# Supplementary material for: Leveraging pQTL-based Mendelian randomization to identify new treatment prospects for primary biliary cholangitis and primary sclerosing cholangitis
Source: publisher site journal article supplement (doi:10.18632/aging.205867), 2024-05-27
Supplement: Supplementary file [file aging-v16i10-205867-supplementary-material-SD3.pdf]

## SUPPLEMENTARY TABLES

**Supplementary Table 2. Information of two outcome datasets (PBC and PSC) from FINNGEN database.**

| Name                                  | Ncase | Ncontrol | Url                                                                                                                                                                                                         |
|---------------------------------------|-------|----------|-------------------------------------------------------------------------------------------------------------------------------------------------------------------------------------------------------------|
| Primary biliary cholangitis (PBC)     | 557   | 281127   | <a href="https://storage.googleapis.com/finngen-public-data-r9/summary_stats/finngen_R9_CHIRBIL_PRIM.gz">https://storage.googleapis.com/finngen-public-data-r9/summary_stats/finngen_R9_CHIRBIL_PRIM.gz</a> |
| Cholangitis (primary sclerosing, PSC) | 1715  | 330903   | <a href="https://storage.googleapis.com/finngen-public-data-r9/summary_stats/finngen_R9_K11_CHOLANGI.gz">https://storage.googleapis.com/finngen-public-data-r9/summary_stats/finngen_R9_K11_CHOLANGI.gz</a> |

**Supplementary Table 6. The results of reverse Mendelian randomization between ERAP1 coded protein and PBC.**

| id.exposure | id.outcome | Outcome | Exposure | Method                    | nsnp | b        | se       | p-val    |
|-------------|------------|---------|----------|---------------------------|------|----------|----------|----------|
| KxOEMA      | ERAP1      | ERAP1   | PBC      | MR Egger                  | 3    | -0.01979 | 0.089422 | 0.861327 |
| KxOEMA      | ERAP1      | ERAP1   | PBC      | Weighted median           | 3    | 0.013847 | 0.012106 | 0.252686 |
| KxOEMA      | ERAP1      | ERAP1   | PBC      | Inverse variance weighted | 3    | 0.023478 | 0.017492 | 0.179524 |
| KxOEMA      | ERAP1      | ERAP1   | PBC      | Simple mode               | 3    | 0.010633 | 0.016608 | 0.587571 |
| KxOEMA      | ERAP1      | ERAP1   | PBC      | Weighted mode             | 3    | 0.00895  | 0.014435 | 0.598468 |
