# Supplementary material for: Leveraging pQTL-based Mendelian randomization to identify new treatment prospects for primary biliary cholangitis and primary sclerosing cholangitis
Source: publisher site journal article supplement (doi:10.18632/aging.205867), 2024-05-27
Supplement: Supplementary file [file aging-v16i10-205867-supplementary-material-SD6.pdf]

**Supplementary Table 5. The detailed results of Mendelian randomization between 1046 druggable proteins and primary sclerosing cholangitis.**

| id.exposur | id.outcom | outcome | exposure | method     | nsnp | b        | se       | pval     |
|------------|-----------|---------|----------|------------|------|----------|----------|----------|
| 10037_98   | finngen_R | outcome | 10037_98 | MR Egger   | 128  | 0.038122 | 0.039215 | 0.33285  |
| 10037_98   | finngen_R | outcome | 10037_98 | Weighted   | 128  | 0.036696 | 0.04522  | 0.417072 |
| 10037_98   | finngen_R | outcome | 10037_98 | Inverse va | 128  | 0.020002 | 0.026433 | 0.449221 |
| 10037_98   | finngen_R | outcome | 10037_98 | Simple mc  | 128  | 0.106074 | 0.077898 | 0.175701 |
| 10037_98   | finngen_R | outcome | 10037_98 | Weighted   | 128  | 0.057225 | 0.036959 | 0.124027 |
| 10042_8    | finngen_R | outcome | 10042_8  | Wald ratio | 1    | 0.060078 | 1.420504 | 0.966265 |
| 10070_22   | finngen_R | outcome | 10070_22 | MR Egger   | 9    | -0.21015 | 0.394866 | 0.611044 |
| 10070_22   | finngen_R | outcome | 10070_22 | Weighted   | 9    | -0.38704 | 0.213252 | 0.069535 |
| 10070_22   | finngen_R | outcome | 10070_22 | Inverse va | 9    | -0.22141 | 0.165647 | 0.181344 |
| 10070_22   | finngen_R | outcome | 10070_22 | Simple mc  | 9    | -0.44334 | 0.33474  | 0.221944 |
| 10070_22   | finngen_R | outcome | 10070_22 | Weighted   | 9    | -0.44334 | 0.275924 | 0.146777 |
| 10346_5    | finngen_R | outcome | 10346_5  | MR Egger   | 11   | 0.795964 | 0.507678 | 0.151359 |
| 10346_5    | finngen_R | outcome | 10346_5  | Weighted   | 11   | 0.352169 | 0.196277 | 0.072774 |
| 10346_5    | finngen_R | outcome | 10346_5  | Inverse va | 11   | 0.356831 | 0.165518 | 0.031095 |
| 10346_5    | finngen_R | outcome | 10346_5  | Simple mc  | 11   | 0.056106 | 0.289231 | 0.850072 |
| 10346_5    | finngen_R | outcome | 10346_5  | Weighted   | 11   | 0.403337 | 0.206864 | 0.079779 |
| 10366_11   | finngen_R | outcome | 10366_11 | MR Egger   | 6    | 0.664376 | 1.22145  | 0.615392 |
| 10366_11   | finngen_R | outcome | 10366_11 | Weighted   | 6    | 0.311927 | 0.298318 | 0.295736 |
| 10366_11   | finngen_R | outcome | 10366_11 | Inverse va | 6    | 0.176544 | 0.260927 | 0.498658 |
| 10366_11   | finngen_R | outcome | 10366_11 | Simple mc  | 6    | 0.275095 | 0.398801 | 0.521019 |
| 10366_11   | finngen_R | outcome | 10366_11 | Weighted   | 6    | 0.293837 | 0.313433 | 0.39155  |
| 10372_18   | finngen_R | outcome | 10372_18 | MR Egger   | 11   | 0.19275  | 0.537315 | 0.72807  |
| 10372_18   | finngen_R | outcome | 10372_18 | Weighted   | 11   | 0.087411 | 0.238346 | 0.713812 |
| 10372_18   | finngen_R | outcome | 10372_18 | Inverse va | 11   | -0.09325 | 0.234308 | 0.690645 |
| 10372_18   | finngen_R | outcome | 10372_18 | Simple mc  | 11   | 0.092041 | 0.384587 | 0.815689 |
| 10372_18   | finngen_R | outcome | 10372_18 | Weighted   | 11   | 0.068864 | 0.298593 | 0.822253 |
| 10391_1    | finngen_R | outcome | 10391_1  | MR Egger   | 42   | 0.101819 | 0.116612 | 0.3878   |
| 10391_1    | finngen_R | outcome | 10391_1  | Weighted   | 42   | -0.05365 | 0.09925  | 0.588787 |
| 10391_1    | finngen_R | outcome | 10391_1  | Inverse va | 42   | 0.074818 | 0.071615 | 0.296147 |
| 10391_1    | finngen_R | outcome | 10391_1  | Simple mc  | 42   | -0.19168 | 0.20289  | 0.350323 |
| 10391_1    | finngen_R | outcome | 10391_1  | Weighted   | 42   | 0.030246 | 0.108309 | 0.78145  |
| 10396_6    | finngen_R | outcome | 10396_6  | MR Egger   | 3    | -0.0585  | 0.722256 | 0.948552 |
| 10396_6    | finngen_R | outcome | 10396_6  | Weighted   | 3    | -0.07523 | 0.232884 | 0.746661 |
| 10396_6    | finngen_R | outcome | 10396_6  | Inverse va | 3    | -0.02905 | 0.24621  | 0.906066 |
| 10396_6    | finngen_R | outcome | 10396_6  | Simple mc  | 3    | -0.14083 | 0.325286 | 0.707266 |
| 10396_6    | finngen_R | outcome | 10396_6  | Weighted   | 3    | -0.08314 | 0.239004 | 0.761155 |
| 10451_11   | finngen_R | outcome | 10451_11 | MR Egger   | 9    | -0.75648 | 0.363163 | 0.075744 |
| 10451_11   | finngen_R | outcome | 10451_11 | Weighted   | 9    | -0.24414 | 0.212981 | 0.251663 |
| 10451_11   | finngen_R | outcome | 10451_11 | Inverse va | 9    | -0.16799 | 0.174854 | 0.336668 |
| 10451_11   | finngen_R | outcome | 10451_11 | Simple mc  | 9    | -0.15697 | 0.312835 | 0.629347 |
| 10451_11   | finngen_R | outcome | 10451_11 | Weighted   | 9    | -0.32704 | 0.219672 | 0.174877 |
| 10462_14   | finngen_R | outcome | 10462_14 | Wald ratio | 1    | -0.96266 | 0.619432 | 0.12016  |
| 10490_3    | finngen_R | outcome | 10490_3  | MR Egger   | 9    | -0.5025  | 0.499402 | 0.347824 |
| 10490_3    | finngen_R | outcome | 10490_3  | Weighted   | 9    | -0.21229 | 0.211265 | 0.31496  |
| 10490_3    | finngen_R | outcome | 10490_3  | Inverse va | 9    | -0.13718 | 0.171506 | 0.423793 |
| 10490_3    | finngen_R | outcome | 10490_3  | Simple mc  | 9    | -0.30734 | 0.31807  | 0.362203 |
| 10490_3    | finngen_R | outcome | 10490_3  | Weighted   | 9    | -0.23435 | 0.211278 | 0.299572 |
| 10511_10   | finngen_R | outcome | 10511_10 | MR Egger   | 6    | -0.40169 | 1.050758 | 0.721693 |
| 10511_10   | finngen_R | outcome | 10511_10 | Weighted   | 6    | -0.14648 | 0.286741 | 0.609455 |
| 10511_10   | finngen_R | outcome | 10511_10 | Inverse va | 6    | -0.21793 | 0.255853 | 0.394339 |
| 10511_10   | finngen_R | outcome | 10511_10 | Simple mc  | 6    | 0.013692 | 0.491417 | 0.97885  |
| 10511_10   | finngen_R | outcome | 10511_10 | Weighted   | 6    | -0.05799 | 0.308881 | 0.85845  |
| 10512_13   | finngen_R | outcome | 10512_13 | MR Egger   | 70   | 0.012909 | 0.113951 | 0.910138 |
| 10512_13   | finngen_R | outcome | 10512_13 | Weighted   | 70   | -0.12243 | 0.083512 | 0.142648 |
| 10512_13   | finngen_R | outcome | 10512_13 | Inverse va | 70   | -0.054   | 0.058588 | 0.356684 |
| 10512_13   | finngen_R | outcome | 10512_13 | Simple mc  | 70   | -0.15855 | 0.144686 | 0.276981 |
| 10512_13   | finngen_R | outcome | 10512_13 | Weighted   | 70   | -0.13221 | 0.095047 | 0.16868  |

|                             |                      |    |          |          |          |
|-----------------------------|----------------------|----|----------|----------|----------|
| 10514_5_Ffinngen_R outcome  | 10514_5_FMR Egger    | 7  | -0.07375 | 0.431274 | 0.870919 |
| 10514_5_Ffinngen_R outcome  | 10514_5_FWeighted    | 7  | 0.1469   | 0.197394 | 0.456758 |
| 10514_5_Ffinngen_R outcome  | 10514_5_FInverse va  | 7  | 0.157012 | 0.166889 | 0.346798 |
| 10514_5_Ffinngen_R outcome  | 10514_5_FSimple mc   | 7  | 0.089486 | 0.275978 | 0.756755 |
| 10514_5_Ffinngen_R outcome  | 10514_5_FWeighted    | 7  | 0.104672 | 0.22759  | 0.661771 |
| 10534_40_finngen_R outcome  | 10534_40_Wald ratio  | 1  | -0.68681 | 0.642801 | 0.285313 |
| 10554_23_finngen_R outcome  | 10554_23_Inverse va  | 2  | -0.1499  | 0.573869 | 0.793932 |
| 10561_5_Ffinngen_R outcome  | 10561_5_FMR Egger    | 3  | 0.125103 | 0.716985 | 0.890027 |
| 10561_5_Ffinngen_R outcome  | 10561_5_FWeighted    | 3  | -0.68983 | 0.430916 | 0.109409 |
| 10561_5_Ffinngen_R outcome  | 10561_5_FInverse va  | 3  | -0.60411 | 0.39679  | 0.127885 |
| 10561_5_Ffinngen_R outcome  | 10561_5_FSimple mc   | 3  | -1.17014 | 0.696124 | 0.234794 |
| 10561_5_Ffinngen_R outcome  | 10561_5_FWeighted    | 3  | -0.0608  | 0.462817 | 0.907507 |
| 10569_28_finngen_R outcome  | 10569_28_MR Egger    | 32 | 0.2009   | 0.203741 | 0.331992 |
| 10569_28_finngen_R outcome  | 10569_28_Weighted    | 32 | 0.121265 | 0.128869 | 0.34671  |
| 10569_28_finngen_R outcome  | 10569_28_Inverse va  | 32 | 0.054659 | 0.088641 | 0.537472 |
| 10569_28_finngen_R outcome  | 10569_28_Simple mc   | 32 | 0.098043 | 0.225379 | 0.666567 |
| 10569_28_finngen_R outcome  | 10569_28_Weighted    | 32 | 0.113162 | 0.147481 | 0.448709 |
| 10603_1_Ffinngen_R outcome  | 10603_1_FMR Egger    | 4  | 0.313917 | 0.617738 | 0.661837 |
| 10603_1_Ffinngen_R outcome  | 10603_1_FWeighted    | 4  | 0.077055 | 0.242523 | 0.750695 |
| 10603_1_Ffinngen_R outcome  | 10603_1_FInverse va  | 4  | 0.169556 | 0.299222 | 0.570947 |
| 10603_1_Ffinngen_R outcome  | 10603_1_FSimple mc   | 4  | -0.0397  | 0.340318 | 0.914504 |
| 10603_1_Ffinngen_R outcome  | 10603_1_FWeighted    | 4  | 0.073486 | 0.253832 | 0.791049 |
| 10620_21_finngen_R outcome  | 10620_21_MR Egger    | 93 | 0.049711 | 0.039855 | 0.21549  |
| 10620_21_finngen_R outcome  | 10620_21_Weighted    | 93 | 0.048306 | 0.034443 | 0.160771 |
| 10620_21_finngen_R outcome  | 10620_21_Inverse va  | 93 | -0.00196 | 0.022036 | 0.928949 |
| 10620_21_finngen_R outcome  | 10620_21_Simple mc   | 93 | 0.048687 | 0.062804 | 0.440196 |
| 10620_21_finngen_R outcome  | 10620_21_Weighted    | 93 | 0.02916  | 0.032918 | 0.378018 |
| 10666_7_Cfinngen_R outcome  | 10666_7_CMR Egger    | 26 | 0.16907  | 0.139796 | 0.238285 |
| 10666_7_Cfinngen_R outcome  | 10666_7_CWeighted    | 26 | 0.101521 | 0.118928 | 0.393309 |
| 10666_7_Cfinngen_R outcome  | 10666_7_CInverse va  | 26 | 0.062262 | 0.084608 | 0.461801 |
| 10666_7_Cfinngen_R outcome  | 10666_7_CSimple mc   | 26 | -0.00264 | 0.211276 | 0.990126 |
| 10666_7_Cfinngen_R outcome  | 10666_7_CWeighted    | 26 | 0.078569 | 0.111381 | 0.487077 |
| 10672_75_finngen_R outcome  | 10672_75_MR Egger    | 37 | 0.023042 | 0.106636 | 0.830177 |
| 10672_75_finngen_R outcome  | 10672_75_Weighted    | 37 | 0.051486 | 0.081981 | 0.529987 |
| 10672_75_finngen_R outcome  | 10672_75_Inverse va  | 37 | 0.039923 | 0.061901 | 0.518963 |
| 10672_75_finngen_R outcome  | 10672_75_Simple mc   | 37 | 0.074153 | 0.172792 | 0.670373 |
| 10672_75_finngen_R outcome  | 10672_75_Weighted    | 37 | 0.057582 | 0.082847 | 0.491489 |
| 10708_3_Cfinngen_R outcome  | 10708_3_CMR Egger    | 7  | 0.370432 | 0.28248  | 0.246725 |
| 10708_3_Cfinngen_R outcome  | 10708_3_CWeighted    | 7  | 0.286861 | 0.198338 | 0.148087 |
| 10708_3_Cfinngen_R outcome  | 10708_3_CInverse va  | 7  | 0.283864 | 0.168635 | 0.092316 |
| 10708_3_Cfinngen_R outcome  | 10708_3_CSimple mc   | 7  | -0.0431  | 0.322512 | 0.898065 |
| 10708_3_Cfinngen_R outcome  | 10708_3_CWeighted    | 7  | 0.291472 | 0.206956 | 0.208668 |
| 10714_7_ffinngen_R outcome  | 10714_7_fMR Egger    | 85 | 0.064661 | 0.05913  | 0.277319 |
| 10714_7_ffinngen_R outcome  | 10714_7_fWeighted    | 85 | 0.029937 | 0.05197  | 0.564588 |
| 10714_7_ffinngen_R outcome  | 10714_7_fInverse va  | 85 | 0.050158 | 0.03285  | 0.126787 |
| 10714_7_ffinngen_R outcome  | 10714_7_fSimple mc   | 85 | -0.01295 | 0.09205  | 0.888415 |
| 10714_7_ffinngen_R outcome  | 10714_7_fWeighted    | 85 | 0.056379 | 0.04175  | 0.180513 |
| 10722_13_finngen_R outcome  | 10722_13_MR Egger    | 4  | 1.572483 | 0.976873 | 0.248747 |
| 10722_13_finngen_R outcome  | 10722_13_Weighted    | 4  | -0.65824 | 0.361732 | 0.068807 |
| 10722_13_finngen_R outcome  | 10722_13_Inverse va  | 4  | -0.69707 | 0.401337 | 0.082409 |
| 10722_13_finngen_R outcome  | 10722_13_Simple mc   | 4  | -0.62474 | 0.601604 | 0.375404 |
| 10722_13_finngen_R outcome  | 10722_13_Weighted    | 4  | -0.49534 | 0.488523 | 0.385269 |
| 10737_96_finngen_R outcome  | 10737_96_Wald ratio  | 1  | 0.62062  | 0.438878 | 0.15733  |
| 10754_11_ffinngen_R outcome | 10754_11_fMR Egger   | 74 | 0.024568 | 0.059524 | 0.68102  |
| 10754_11_ffinngen_R outcome | 10754_11_fWeighted   | 74 | 0.008441 | 0.056772 | 0.881804 |
| 10754_11_ffinngen_R outcome | 10754_11_fInverse va | 74 | -0.01856 | 0.037649 | 0.621959 |
| 10754_11_ffinngen_R outcome | 10754_11_fSimple mc  | 74 | -0.40592 | 0.118584 | 0.001019 |
| 10754_11_ffinngen_R outcome | 10754_11_fWeighted   | 74 | 0.015353 | 0.050094 | 0.760105 |

|                              |                      |     |          |          |          |
|------------------------------|----------------------|-----|----------|----------|----------|
| 10809_14_finningen_R outcome | 10809_14_Inverse va  | 2   | 0.699582 | 0.782587 | 0.371357 |
| 10815_2_finningen_R outcome  | 10815_2_f MR Egger   | 35  | -0.03939 | 0.195652 | 0.841697 |
| 10815_2_finningen_R outcome  | 10815_2_f Weighted   | 35  | -0.20824 | 0.121797 | 0.087313 |
| 10815_2_finningen_R outcome  | 10815_2_f Inverse va | 35  | -0.2357  | 0.086066 | 0.006169 |
| 10815_2_finningen_R outcome  | 10815_2_f Simple mc  | 35  | -0.50404 | 0.202747 | 0.017991 |
| 10815_2_finningen_R outcome  | 10815_2_f Weighted   | 35  | -0.13688 | 0.166812 | 0.417616 |
| 10818_36_finningen_R outcome | 10818_36 MR Egger    | 43  | 0.048995 | 0.123574 | 0.693803 |
| 10818_36_finningen_R outcome | 10818_36 Weighted    | 43  | 0.043097 | 0.103664 | 0.677599 |
| 10818_36_finningen_R outcome | 10818_36 Inverse va  | 43  | -0.00251 | 0.069289 | 0.97106  |
| 10818_36_finningen_R outcome | 10818_36 Simple mc   | 43  | 0.162388 | 0.215431 | 0.455184 |
| 10818_36_finningen_R outcome | 10818_36 Weighted    | 43  | 0.056783 | 0.112946 | 0.617768 |
| 10833_64_finningen_R outcome | 10833_64 MR Egger    | 9   | -0.27324 | 0.346932 | 0.456767 |
| 10833_64_finningen_R outcome | 10833_64 Weighted    | 9   | -0.19397 | 0.224254 | 0.387056 |
| 10833_64_finningen_R outcome | 10833_64 Inverse va  | 9   | -0.09037 | 0.171266 | 0.597717 |
| 10833_64_finningen_R outcome | 10833_64 Simple mc   | 9   | -0.09119 | 0.365231 | 0.809121 |
| 10833_64_finningen_R outcome | 10833_64 Weighted    | 9   | -0.25077 | 0.246183 | 0.338185 |
| 10851_77_finningen_R outcome | 10851_77 MR Egger    | 181 | 0.023801 | 0.04338  | 0.583924 |
| 10851_77_finningen_R outcome | 10851_77 Weighted    | 181 | -0.01472 | 0.044639 | 0.741664 |
| 10851_77_finningen_R outcome | 10851_77 Inverse va  | 181 | -0.00768 | 0.02788  | 0.783023 |
| 10851_77_finningen_R outcome | 10851_77 Simple mc   | 181 | 0.048914 | 0.095929 | 0.610752 |
| 10851_77_finningen_R outcome | 10851_77 Weighted    | 181 | 0.003144 | 0.047555 | 0.94736  |
| 10907_11_finningen_R outcome | 10907_11 MR Egger    | 73  | 0.020364 | 0.090026 | 0.821696 |
| 10907_11_finningen_R outcome | 10907_11 Weighted    | 73  | 0.020083 | 0.077758 | 0.796198 |
| 10907_11_finningen_R outcome | 10907_11 Inverse va  | 73  | 0.058811 | 0.049398 | 0.233834 |
| 10907_11_finningen_R outcome | 10907_11 Simple mc   | 73  | 0.102505 | 0.167911 | 0.543472 |
| 10907_11_finningen_R outcome | 10907_11 Weighted    | 73  | 0.019176 | 0.080634 | 0.8127   |
| 10916_44_finningen_R outcome | 10916_44 MR Egger    | 120 | -0.00677 | 0.047943 | 0.887891 |
| 10916_44_finningen_R outcome | 10916_44 Weighted    | 120 | -0.04792 | 0.037677 | 0.203374 |
| 10916_44_finningen_R outcome | 10916_44 Inverse va  | 120 | -0.04041 | 0.024867 | 0.104142 |
| 10916_44_finningen_R outcome | 10916_44 Simple mc   | 120 | 0.015216 | 0.075024 | 0.839631 |
| 10916_44_finningen_R outcome | 10916_44 Weighted    | 120 | 0.005576 | 0.040667 | 0.891178 |
| 10924_25_finningen_R outcome | 10924_25 MR Egger    | 14  | -0.00708 | 0.157845 | 0.964975 |
| 10924_25_finningen_R outcome | 10924_25 Weighted    | 14  | -0.01965 | 0.112854 | 0.861767 |
| 10924_25_finningen_R outcome | 10924_25 Inverse va  | 14  | -0.00231 | 0.088665 | 0.979255 |
| 10924_25_finningen_R outcome | 10924_25 Simple mc   | 14  | -0.08596 | 0.166574 | 0.614504 |
| 10924_25_finningen_R outcome | 10924_25 Weighted    | 14  | -0.0136  | 0.120028 | 0.911534 |
| 10938_13_finningen_R outcome | 10938_13 MR Egger    | 4   | -0.15884 | 0.186794 | 0.484697 |
| 10938_13_finningen_R outcome | 10938_13 Weighted    | 4   | -0.10289 | 0.126119 | 0.414617 |
| 10938_13_finningen_R outcome | 10938_13 Inverse va  | 4   | -0.091   | 0.120821 | 0.451335 |
| 10938_13_finningen_R outcome | 10938_13 Simple mc   | 4   | -0.11486 | 0.196336 | 0.599642 |
| 10938_13_finningen_R outcome | 10938_13 Weighted    | 4   | -0.10444 | 0.142168 | 0.515799 |
| 10977_55_finningen_R outcome | 10977_55 MR Egger    | 63  | 0.056372 | 0.106539 | 0.598638 |
| 10977_55_finningen_R outcome | 10977_55 Weighted    | 63  | 0.045417 | 0.083223 | 0.585251 |
| 10977_55_finningen_R outcome | 10977_55 Inverse va  | 63  | -0.0366  | 0.054036 | 0.498187 |
| 10977_55_finningen_R outcome | 10977_55 Simple mc   | 63  | -0.00039 | 0.157526 | 0.998039 |
| 10977_55_finningen_R outcome | 10977_55 Weighted    | 63  | 0.089212 | 0.118199 | 0.453249 |
| 11102_22_finningen_R outcome | 11102_22 MR Egger    | 10  | -0.13263 | 0.429896 | 0.765578 |
| 11102_22_finningen_R outcome | 11102_22 Weighted    | 10  | 0.14662  | 0.181529 | 0.419267 |
| 11102_22_finningen_R outcome | 11102_22 Inverse va  | 10  | 0.312267 | 0.146122 | 0.032596 |
| 11102_22_finningen_R outcome | 11102_22 Simple mc   | 10  | 0.30768  | 0.300128 | 0.332051 |
| 11102_22_finningen_R outcome | 11102_22 Weighted    | 10  | 0.097303 | 0.204556 | 0.645638 |
| 11103_24_finningen_R outcome | 11103_24 MR Egger    | 55  | 0.067619 | 0.096619 | 0.487079 |
| 11103_24_finningen_R outcome | 11103_24 Weighted    | 55  | 0.060711 | 0.073792 | 0.41066  |
| 11103_24_finningen_R outcome | 11103_24 Inverse va  | 55  | 0.045909 | 0.051573 | 0.373371 |
| 11103_24_finningen_R outcome | 11103_24 Simple mc   | 55  | 0.109007 | 0.120768 | 0.370739 |
| 11103_24_finningen_R outcome | 11103_24 Weighted    | 55  | 0.015724 | 0.080862 | 0.846553 |
| 11104_13_finningen_R outcome | 11104_13 MR Egger    | 149 | -0.04779 | 0.043754 | 0.276491 |
| 11104_13_finningen_R outcome | 11104_13 Weighted    | 149 | -0.06787 | 0.039144 | 0.082948 |

|                              |                     |     |          |          |          |
|------------------------------|---------------------|-----|----------|----------|----------|
| 11104_13_finningen_R outcome | 11104_13_Inverse va | 149 | -0.06609 | 0.025078 | 0.008408 |
| 11104_13_finningen_R outcome | 11104_13_Simple mc  | 149 | -0.00669 | 0.081535 | 0.934727 |
| 11104_13_finningen_R outcome | 11104_13_Weighted   | 149 | -0.07883 | 0.041632 | 0.06024  |
| 11126_10_finningen_R outcome | 11126_10_Wald ratio | 1   | 0.321494 | 0.795018 | 0.685929 |
| 11140_56_finningen_R outcome | 11140_56_MR Egger   | 8   | -0.22997 | 0.266857 | 0.421908 |
| 11140_56_finningen_R outcome | 11140_56_Weighted   | 8   | 0.059426 | 0.166821 | 0.721673 |
| 11140_56_finningen_R outcome | 11140_56_Inverse va | 8   | -0.07145 | 0.156783 | 0.648575 |
| 11140_56_finningen_R outcome | 11140_56_Simple mc  | 8   | 0.061141 | 0.268721 | 0.826518 |
| 11140_56_finningen_R outcome | 11140_56_Weighted   | 8   | 0.094672 | 0.21142  | 0.667835 |
| 11142_11_finningen_R outcome | 11142_11_MR Egger   | 51  | -0.09691 | 0.111046 | 0.387099 |
| 11142_11_finningen_R outcome | 11142_11_Weighted   | 51  | -0.01922 | 0.075134 | 0.79812  |
| 11142_11_finningen_R outcome | 11142_11_Inverse va | 51  | -0.043   | 0.056534 | 0.446946 |
| 11142_11_finningen_R outcome | 11142_11_Simple mc  | 51  | 0.068379 | 0.134122 | 0.612417 |
| 11142_11_finningen_R outcome | 11142_11_Weighted   | 51  | -0.03023 | 0.074107 | 0.685076 |
| 11152_46_finningen_R outcome | 11152_46_MR Egger   | 32  | 0.179902 | 0.090189 | 0.055228 |
| 11152_46_finningen_R outcome | 11152_46_Weighted   | 32  | 0.104245 | 0.075393 | 0.16676  |
| 11152_46_finningen_R outcome | 11152_46_Inverse va | 32  | 0.105206 | 0.054463 | 0.053396 |
| 11152_46_finningen_R outcome | 11152_46_Simple mc  | 32  | 0.000877 | 0.169662 | 0.995908 |
| 11152_46_finningen_R outcome | 11152_46_Weighted   | 32  | 0.097987 | 0.073525 | 0.192342 |
| 11192_16_finningen_R outcome | 11192_16_MR Egger   | 3   | 0.922308 | 0.69063  | 0.409179 |
| 11192_16_finningen_R outcome | 11192_16_Weighted   | 3   | 0.041662 | 0.354555 | 0.90646  |
| 11192_16_finningen_R outcome | 11192_16_Inverse va | 3   | 0.184101 | 0.290539 | 0.526307 |
| 11192_16_finningen_R outcome | 11192_16_Simple mc  | 3   | -0.14038 | 0.476415 | 0.79602  |
| 11192_16_finningen_R outcome | 11192_16_Weighted   | 3   | -0.12129 | 0.479776 | 0.824035 |
| 11196_31_finningen_R outcome | 11196_31_MR Egger   | 3   | 0.790434 | 2.315282 | 0.790557 |
| 11196_31_finningen_R outcome | 11196_31_Weighted   | 3   | -0.17262 | 0.414511 | 0.677093 |
| 11196_31_finningen_R outcome | 11196_31_Inverse va | 3   | -0.21183 | 0.368049 | 0.564912 |
| 11196_31_finningen_R outcome | 11196_31_Simple mc  | 3   | -0.17849 | 0.509189 | 0.759414 |
| 11196_31_finningen_R outcome | 11196_31_Weighted   | 3   | -0.12247 | 0.477021 | 0.821375 |
| 11219_95_finningen_R outcome | 11219_95_MR Egger   | 27  | -0.04789 | 0.211182 | 0.82245  |
| 11219_95_finningen_R outcome | 11219_95_Weighted   | 27  | 0.205448 | 0.141503 | 0.146529 |
| 11219_95_finningen_R outcome | 11219_95_Inverse va | 27  | 0.206581 | 0.10751  | 0.054668 |
| 11219_95_finningen_R outcome | 11219_95_Simple mc  | 27  | 0.152    | 0.229119 | 0.512907 |
| 11219_95_finningen_R outcome | 11219_95_Weighted   | 27  | 0.152    | 0.185047 | 0.418881 |
| 11237_49_finningen_R outcome | 11237_49_MR Egger   | 15  | 0.119431 | 0.275893 | 0.67219  |
| 11237_49_finningen_R outcome | 11237_49_Weighted   | 15  | -0.29713 | 0.171377 | 0.082953 |
| 11237_49_finningen_R outcome | 11237_49_Inverse va | 15  | -0.13612 | 0.125297 | 0.27731  |
| 11237_49_finningen_R outcome | 11237_49_Simple mc  | 15  | -0.17061 | 0.318336 | 0.600417 |
| 11237_49_finningen_R outcome | 11237_49_Weighted   | 15  | -0.30257 | 0.216004 | 0.183057 |
| 11257_1_finningen_R outcome  | 11257_1_MR Egger    | 36  | 0.019956 | 0.115599 | 0.863967 |
| 11257_1_finningen_R outcome  | 11257_1_Weighted    | 36  | -0.01015 | 0.093326 | 0.913415 |
| 11257_1_finningen_R outcome  | 11257_1_Inverse va  | 36  | 0.034739 | 0.0655   | 0.595861 |
| 11257_1_finningen_R outcome  | 11257_1_Simple mc   | 36  | -0.03858 | 0.16572  | 0.81726  |
| 11257_1_finningen_R outcome  | 11257_1_Weighted    | 36  | -0.002   | 0.083374 | 0.981016 |
| 11265_8_finningen_R outcome  | 11265_8_MR Egger    | 5   | -1.03854 | 0.799711 | 0.284874 |
| 11265_8_finningen_R outcome  | 11265_8_Weighted    | 5   | -0.39843 | 0.319823 | 0.212846 |
| 11265_8_finningen_R outcome  | 11265_8_Inverse va  | 5   | -0.36934 | 0.272944 | 0.176007 |
| 11265_8_finningen_R outcome  | 11265_8_Simple mc   | 5   | -0.47645 | 0.486979 | 0.38328  |
| 11265_8_finningen_R outcome  | 11265_8_Weighted    | 5   | -0.39094 | 0.379533 | 0.361196 |
| 11266_8_finningen_R outcome  | 11266_8_MR Egger    | 32  | 0.15701  | 0.125482 | 0.220512 |
| 11266_8_finningen_R outcome  | 11266_8_Weighted    | 32  | -0.043   | 0.112625 | 0.702605 |
| 11266_8_finningen_R outcome  | 11266_8_Inverse va  | 32  | -0.12938 | 0.07779  | 0.096283 |
| 11266_8_finningen_R outcome  | 11266_8_Simple mc   | 32  | -0.03265 | 0.167108 | 0.846374 |
| 11266_8_finningen_R outcome  | 11266_8_Weighted    | 32  | 0.031142 | 0.104334 | 0.767323 |
| 11273_17_finningen_R outcome | 11273_17_MR Egger   | 23  | -0.10702 | 0.153143 | 0.492316 |
| 11273_17_finningen_R outcome | 11273_17_Weighted   | 23  | -0.15685 | 0.121328 | 0.1961   |
| 11273_17_finningen_R outcome | 11273_17_Inverse va | 23  | -0.25691 | 0.089196 | 0.003973 |
| 11273_17_finningen_R outcome | 11273_17_Simple mc  | 23  | -0.35845 | 0.217777 | 0.113992 |

|           |                   |           |            |    |          |          |          |
|-----------|-------------------|-----------|------------|----|----------|----------|----------|
| 11273_17f | finngen_R outcome | 11273_17f | Weighted   | 23 | -0.24396 | 0.117069 | 0.04899  |
| 11302_23f | finngen_R outcome | 11302_23f | MR Egger   | 5  | 0.040455 | 0.746982 | 0.960215 |
| 11302_23f | finngen_R outcome | 11302_23f | Weighted   | 5  | -0.24695 | 0.224575 | 0.271499 |
| 11302_23f | finngen_R outcome | 11302_23f | Inverse va | 5  | -0.21507 | 0.220563 | 0.329524 |
| 11302_23f | finngen_R outcome | 11302_23f | Simple mc  | 5  | -0.25531 | 0.321665 | 0.471782 |
| 11302_23f | finngen_R outcome | 11302_23f | Weighted   | 5  | -0.26278 | 0.252132 | 0.356151 |
| 11360_39f | finngen_R outcome | 11360_39f | Wald ratio | 1  | -0.58924 | 0.626349 | 0.34683  |
| 11369_23f | finngen_R outcome | 11369_23f | MR Egger   | 15 | -0.08138 | 0.266799 | 0.765164 |
| 11369_23f | finngen_R outcome | 11369_23f | Weighted   | 15 | -0.15986 | 0.179318 | 0.372657 |
| 11369_23f | finngen_R outcome | 11369_23f | Inverse va | 15 | -0.04315 | 0.132599 | 0.744884 |
| 11369_23f | finngen_R outcome | 11369_23f | Simple mc  | 15 | 0.502313 | 0.333066 | 0.153749 |
| 11369_23f | finngen_R outcome | 11369_23f | Weighted   | 15 | -0.20974 | 0.22196  | 0.360709 |
| 11377_19f | finngen_R outcome | 11377_19f | MR Egger   | 29 | 0.05993  | 0.153841 | 0.699921 |
| 11377_19f | finngen_R outcome | 11377_19f | Weighted   | 29 | 0.135183 | 0.108179 | 0.211434 |
| 11377_19f | finngen_R outcome | 11377_19f | Inverse va | 29 | 0.206722 | 0.093824 | 0.027575 |
| 11377_19f | finngen_R outcome | 11377_19f | Simple mc  | 29 | 0.183808 | 0.224432 | 0.419707 |
| 11377_19f | finngen_R outcome | 11377_19f | Weighted   | 29 | 0.117238 | 0.10807  | 0.287246 |
| 11378_37f | finngen_R outcome | 11378_37f | MR Egger   | 6  | -0.1517  | 0.647053 | 0.826148 |
| 11378_37f | finngen_R outcome | 11378_37f | Weighted   | 6  | -0.46944 | 0.292296 | 0.108263 |
| 11378_37f | finngen_R outcome | 11378_37f | Inverse va | 6  | -0.41895 | 0.231969 | 0.070907 |
| 11378_37f | finngen_R outcome | 11378_37f | Simple mc  | 6  | -0.73581 | 0.447976 | 0.161404 |
| 11378_37f | finngen_R outcome | 11378_37f | Weighted   | 6  | -0.74977 | 0.468192 | 0.170185 |
| 11388_75f | finngen_R outcome | 11388_75f | Inverse va | 2  | -0.09554 | 0.719996 | 0.894432 |
| 11390_24f | finngen_R outcome | 11390_24f | MR Egger   | 55 | 0.078593 | 0.095451 | 0.41398  |
| 11390_24f | finngen_R outcome | 11390_24f | Weighted   | 55 | 0.040852 | 0.073827 | 0.580022 |
| 11390_24f | finngen_R outcome | 11390_24f | Inverse va | 55 | -0.02739 | 0.052741 | 0.603556 |
| 11390_24f | finngen_R outcome | 11390_24f | Simple mc  | 55 | -0.13921 | 0.145142 | 0.341766 |
| 11390_24f | finngen_R outcome | 11390_24f | Weighted   | 55 | -0.0083  | 0.07253  | 0.909271 |
| 11431_23f | finngen_R outcome | 11431_23f | MR Egger   | 34 | 0.098009 | 0.116219 | 0.405313 |
| 11431_23f | finngen_R outcome | 11431_23f | Weighted   | 34 | 0.165722 | 0.109708 | 0.130897 |
| 11431_23f | finngen_R outcome | 11431_23f | Inverse va | 34 | 0.209407 | 0.074213 | 0.004777 |
| 11431_23f | finngen_R outcome | 11431_23f | Simple mc  | 34 | 0.175481 | 0.190789 | 0.36437  |
| 11431_23f | finngen_R outcome | 11431_23f | Weighted   | 34 | 0.189664 | 0.157375 | 0.236709 |
| 11441_11f | finngen_R outcome | 11441_11f | MR Egger   | 3  | 0.043585 | 0.527858 | 0.947554 |
| 11441_11f | finngen_R outcome | 11441_11f | Weighted   | 3  | 0.060824 | 0.238204 | 0.798459 |
| 11441_11f | finngen_R outcome | 11441_11f | Inverse va | 3  | 0.065312 | 0.225909 | 0.7725   |
| 11441_11f | finngen_R outcome | 11441_11f | Simple mc  | 3  | 0.139354 | 0.301841 | 0.689662 |
| 11441_11f | finngen_R outcome | 11441_11f | Weighted   | 3  | 0.074686 | 0.294434 | 0.823454 |
| 11480_1_f | finngen_R outcome | 11480_1_f | MR Egger   | 3  | -0.10133 | 0.683695 | 0.906327 |
| 11480_1_f | finngen_R outcome | 11480_1_f | Weighted   | 3  | -0.23211 | 0.262206 | 0.376032 |
| 11480_1_f | finngen_R outcome | 11480_1_f | Inverse va | 3  | -0.26748 | 0.2473   | 0.279426 |
| 11480_1_f | finngen_R outcome | 11480_1_f | Simple mc  | 3  | -0.12653 | 0.359485 | 0.758487 |
| 11480_1_f | finngen_R outcome | 11480_1_f | Weighted   | 3  | -0.20693 | 0.295597 | 0.556367 |
| 11510_31f | finngen_R outcome | 11510_31f | MR Egger   | 34 | -0.02709 | 0.126868 | 0.832254 |
| 11510_31f | finngen_R outcome | 11510_31f | Weighted   | 34 | -0.09951 | 0.093896 | 0.289253 |
| 11510_31f | finngen_R outcome | 11510_31f | Inverse va | 34 | 0.006607 | 0.075935 | 0.930662 |
| 11510_31f | finngen_R outcome | 11510_31f | Simple mc  | 34 | -0.10732 | 0.194099 | 0.584054 |
| 11510_31f | finngen_R outcome | 11510_31f | Weighted   | 34 | -0.09474 | 0.085952 | 0.278355 |
| 11514_19f | finngen_R outcome | 11514_19f | MR Egger   | 8  | -0.29024 | 0.29357  | 0.361004 |
| 11514_19f | finngen_R outcome | 11514_19f | Weighted   | 8  | 0.14127  | 0.158015 | 0.371306 |
| 11514_19f | finngen_R outcome | 11514_19f | Inverse va | 8  | 0.15112  | 0.134663 | 0.261772 |
| 11514_19f | finngen_R outcome | 11514_19f | Simple mc  | 8  | 0.299724 | 0.263171 | 0.292217 |
| 11514_19f | finngen_R outcome | 11514_19f | Weighted   | 8  | 0.143698 | 0.161254 | 0.402449 |
| 11516_7_F | finngen_R outcome | 11516_7_F | Wald ratio | 1  | -0.43672 | 0.314486 | 0.164934 |
| 11531_24f | finngen_R outcome | 11531_24f | MR Egger   | 26 | 0.080678 | 0.177439 | 0.653423 |
| 11531_24f | finngen_R outcome | 11531_24f | Weighted   | 26 | 0.108432 | 0.114447 | 0.343414 |
| 11531_24f | finngen_R outcome | 11531_24f | Inverse va | 26 | 0.084727 | 0.089184 | 0.3421   |
| 11531_24f | finngen_R outcome | 11531_24f | Simple mc  | 26 | 0.056509 | 0.215612 | 0.795401 |

|                             |                      |     |          |          |          |
|-----------------------------|----------------------|-----|----------|----------|----------|
| 11531_24_finngen_R outcome  | 11531_24 Weighted    | 26  | 0.130848 | 0.114953 | 0.265796 |
| 11547_84_finngen_R outcome  | 11547_84 Inverse va  | 2   | 0.733813 | 0.405896 | 0.070624 |
| 11568_2_Ffinngen_R outcome  | 11568_2_FMR Egger    | 17  | 0.355768 | 0.20255  | 0.099402 |
| 11568_2_Ffinngen_R outcome  | 11568_2_FWeighted    | 17  | 0.278038 | 0.13387  | 0.037809 |
| 11568_2_Ffinngen_R outcome  | 11568_2_FInverse va  | 17  | 0.325357 | 0.097872 | 0.000886 |
| 11568_2_Ffinngen_R outcome  | 11568_2_FSimple mc   | 17  | 0.215202 | 0.229595 | 0.362533 |
| 11568_2_Ffinngen_R outcome  | 11568_2_FWeighted    | 17  | 0.28918  | 0.150727 | 0.073062 |
| 11646_4_Cfinngen_R outcome  | 11646_4_CMR Egger    | 30  | 0.013327 | 0.189363 | 0.944392 |
| 11646_4_Cfinngen_R outcome  | 11646_4_CWeighted    | 30  | 0.092865 | 0.121568 | 0.444931 |
| 11646_4_Cfinngen_R outcome  | 11646_4_CInverse va  | 30  | 0.081333 | 0.081743 | 0.319745 |
| 11646_4_Cfinngen_R outcome  | 11646_4_CSimple mc   | 30  | 0.176297 | 0.178412 | 0.331255 |
| 11646_4_Cfinngen_R outcome  | 11646_4_CWeighted    | 30  | 0.080213 | 0.116153 | 0.495317 |
| 11708_2_Lfinngen_R outcome  | 11708_2_LWald ratio  | 1   | -1.20379 | 0.541698 | 0.026266 |
| 12008_3_Cfinngen_R outcome  | 12008_3_CMR Egger    | 12  | 0.193946 | 0.21398  | 0.386058 |
| 12008_3_Cfinngen_R outcome  | 12008_3_CWeighted    | 12  | 0.155719 | 0.170234 | 0.360332 |
| 12008_3_Cfinngen_R outcome  | 12008_3_CInverse va  | 12  | 0.10595  | 0.126796 | 0.403382 |
| 12008_3_Cfinngen_R outcome  | 12008_3_CSimple mc   | 12  | 0.212388 | 0.272706 | 0.452515 |
| 12008_3_Cfinngen_R outcome  | 12008_3_CWeighted    | 12  | 0.187437 | 0.170177 | 0.294231 |
| 12329_21_finngen_R outcome  | 12329_21_MR Egger    | 4   | 2.169619 | 1.170966 | 0.20509  |
| 12329_21_finngen_R outcome  | 12329_21_Weighted    | 4   | -0.63077 | 0.313354 | 0.044117 |
| 12329_21_finngen_R outcome  | 12329_21_Inverse va  | 4   | -0.79595 | 0.439235 | 0.069968 |
| 12329_21_finngen_R outcome  | 12329_21_Simple mc   | 4   | -0.55777 | 0.453951 | 0.306781 |
| 12329_21_finngen_R outcome  | 12329_21_Weighted    | 4   | -0.54566 | 0.346968 | 0.213848 |
| 12338_27_finngen_R outcome  | 12338_27_MR Egger    | 16  | -0.01459 | 0.172342 | 0.933746 |
| 12338_27_finngen_R outcome  | 12338_27_Weighted    | 16  | -0.21835 | 0.15719  | 0.164805 |
| 12338_27_finngen_R outcome  | 12338_27_Inverse va  | 16  | -0.34161 | 0.104759 | 0.00111  |
| 12338_27_finngen_R outcome  | 12338_27_Simple mc   | 16  | -0.34885 | 0.28938  | 0.246681 |
| 12338_27_finngen_R outcome  | 12338_27_Weighted    | 16  | -0.06976 | 0.1881   | 0.715903 |
| 12357_41_finngen_R outcome  | 12357_41_Inverse va  | 2   | 0.127136 | 0.358982 | 0.723222 |
| 12370_30_finngen_R outcome  | 12370_30_MR Egger    | 16  | -0.06496 | 0.338965 | 0.850777 |
| 12370_30_finngen_R outcome  | 12370_30_Weighted    | 16  | -0.12828 | 0.192348 | 0.504834 |
| 12370_30_finngen_R outcome  | 12370_30_Inverse va  | 16  | -0.21151 | 0.189768 | 0.265024 |
| 12370_30_finngen_R outcome  | 12370_30_Simple mc   | 16  | -0.21438 | 0.424775 | 0.621104 |
| 12370_30_finngen_R outcome  | 12370_30_Weighted    | 16  | -0.04621 | 0.210664 | 0.829332 |
| 12381_26_finngen_R outcome  | 12381_26_MR Egger    | 18  | 0.235677 | 0.206169 | 0.269804 |
| 12381_26_finngen_R outcome  | 12381_26_Weighted    | 18  | 0.245535 | 0.174082 | 0.158407 |
| 12381_26_finngen_R outcome  | 12381_26_Inverse va  | 18  | 0.074114 | 0.118643 | 0.532181 |
| 12381_26_finngen_R outcome  | 12381_26_Simple mc   | 18  | 0.336646 | 0.283972 | 0.252132 |
| 12381_26_finngen_R outcome  | 12381_26_Weighted    | 18  | 0.211393 | 0.179473 | 0.255083 |
| 12386_11_finngen_R outcome  | 12386_11_MR Egger    | 53  | 0.176935 | 0.103078 | 0.092138 |
| 12386_11_finngen_R outcome  | 12386_11_Weighted    | 53  | 0.087176 | 0.082356 | 0.289818 |
| 12386_11_finngen_R outcome  | 12386_11_Inverse va  | 53  | 0.119357 | 0.056175 | 0.033609 |
| 12386_11_finngen_R outcome  | 12386_11_Simple mc   | 53  | 0.02933  | 0.143772 | 0.839149 |
| 12386_11_finngen_R outcome  | 12386_11_Weighted    | 53  | 0.098304 | 0.084967 | 0.252571 |
| 12422_14_Cfinngen_R outcome | 12422_14_CWald ratio | 1   | 0.23893  | 0.509713 | 0.639245 |
| 12436_84_finngen_R outcome  | 12436_84_MR Egger    | 112 | -0.11984 | 0.049966 | 0.018151 |
| 12436_84_finngen_R outcome  | 12436_84_Weighted    | 112 | -0.10658 | 0.041902 | 0.010972 |
| 12436_84_finngen_R outcome  | 12436_84_Inverse va  | 112 | -0.15523 | 0.028185 | 3.64E-08 |
| 12436_84_finngen_R outcome  | 12436_84_Simple mc   | 112 | -0.16005 | 0.072936 | 0.030293 |
| 12436_84_finngen_R outcome  | 12436_84_Weighted    | 112 | -0.14886 | 0.037381 | 0.000122 |
| 12437_18_finngen_R outcome  | 12437_18_Wald ratio  | 1   | -0.22504 | 0.423068 | 0.594771 |
| 12449_16_finngen_R outcome  | 12449_16_MR Egger    | 3   | 0.61299  | 2.927389 | 0.868592 |
| 12449_16_finngen_R outcome  | 12449_16_Weighted    | 3   | 0.593431 | 0.388551 | 0.126688 |
| 12449_16_finngen_R outcome  | 12449_16_Inverse va  | 3   | 0.597775 | 0.339657 | 0.078418 |
| 12449_16_finngen_R outcome  | 12449_16_Simple mc   | 3   | 0.515505 | 0.458537 | 0.377715 |
| 12449_16_finngen_R outcome  | 12449_16_Weighted    | 3   | 0.651264 | 0.471415 | 0.301213 |
| 12549_33_finngen_R outcome  | 12549_33_MR Egger    | 65  | 0.00552  | 0.055968 | 0.921741 |
| 12549_33_finngen_R outcome  | 12549_33_Weighted    | 65  | 0.025931 | 0.05568  | 0.641423 |

|                             |                      |     |          |          |          |
|-----------------------------|----------------------|-----|----------|----------|----------|
| 12549_33_finngen_R outcome  | 12549_33_Inverse va  | 65  | 0.020871 | 0.03946  | 0.596866 |
| 12549_33_finngen_R outcome  | 12549_33_Simple mc   | 65  | 0.171175 | 0.131509 | 0.197713 |
| 12549_33_finngen_R outcome  | 12549_33_Weighted    | 65  | 0.037069 | 0.049423 | 0.455987 |
| 12612_37_finngen_R outcome  | 12612_37_MR Egger    | 25  | -0.20801 | 0.166274 | 0.2235   |
| 12612_37_finngen_R outcome  | 12612_37_Weighted    | 25  | -0.15975 | 0.103913 | 0.124212 |
| 12612_37_finngen_R outcome  | 12612_37_Inverse va  | 25  | -0.10567 | 0.076192 | 0.165473 |
| 12612_37_finngen_R outcome  | 12612_37_Simple mc   | 25  | -0.28241 | 0.208981 | 0.189183 |
| 12612_37_finngen_R outcome  | 12612_37_Weighted    | 25  | -0.14495 | 0.095952 | 0.143937 |
| 12616_45_finngen_R outcome  | 12616_45_Wald ratio  | 1   | -0.64236 | 0.716342 | 0.369871 |
| 12703_6_↑finngen_R outcome  | 12703_6_↑Wald ratio  | 1   | 0.298038 | 0.509651 | 0.558689 |
| 12727_7_↓finngen_R outcome  | 12727_7_↓MR Egger    | 100 | 0.092232 | 0.041243 | 0.027602 |
| 12727_7_↓finngen_R outcome  | 12727_7_↓Weighted    | 100 | 0.067965 | 0.045032 | 0.131228 |
| 12727_7_↓finngen_R outcome  | 12727_7_↓Inverse va  | 100 | 0.075664 | 0.027134 | 0.005295 |
| 12727_7_↓finngen_R outcome  | 12727_7_↓Simple mc   | 100 | -0.00322 | 0.082975 | 0.969143 |
| 12727_7_↓finngen_R outcome  | 12727_7_↓Weighted    | 100 | 0.099876 | 0.03714  | 0.008407 |
| 12940_35_finngen_R outcome  | 12940_35_MR Egger    | 3   | 0.156766 | 0.911746 | 0.891599 |
| 12940_35_finngen_R outcome  | 12940_35_Weighted    | 3   | 0.248806 | 0.268764 | 0.354581 |
| 12940_35_finngen_R outcome  | 12940_35_Inverse va  | 3   | 0.27124  | 0.288304 | 0.346801 |
| 12940_35_finngen_R outcome  | 12940_35_Simple mc   | 3   | 0.024695 | 0.417728 | 0.958235 |
| 12940_35_finngen_R outcome  | 12940_35_Weighted    | 3   | 0.197845 | 0.308502 | 0.587005 |
| 12990_39_finngen_R outcome  | 12990_39_Wald ratio  | 1   | -0.16075 | 0.747552 | 0.829736 |
| 13044_5_↑finngen_R outcome  | 13044_5_↑MR Egger    | 6   | -0.56645 | 0.603108 | 0.400797 |
| 13044_5_↑finngen_R outcome  | 13044_5_↑Weighted    | 6   | -0.62367 | 0.221798 | 0.004925 |
| 13044_5_↑finngen_R outcome  | 13044_5_↑Inverse va  | 6   | -0.60958 | 0.233229 | 0.008959 |
| 13044_5_↑finngen_R outcome  | 13044_5_↑Simple mc   | 6   | 0.102115 | 0.485471 | 0.841703 |
| 13044_5_↑finngen_R outcome  | 13044_5_↑Weighted    | 6   | -0.62516 | 0.224927 | 0.03893  |
| 13088_39_↓finngen_R outcome | 13088_39_↓MR Egger   | 11  | 0.123878 | 0.33968  | 0.723765 |
| 13088_39_↓finngen_R outcome | 13088_39_↓Weighted   | 11  | -0.09135 | 0.173707 | 0.598949 |
| 13088_39_↓finngen_R outcome | 13088_39_↓Inverse va | 11  | -0.17862 | 0.135542 | 0.187566 |
| 13088_39_↓finngen_R outcome | 13088_39_↓Simple mc  | 11  | -0.22452 | 0.240922 | 0.373333 |
| 13088_39_↓finngen_R outcome | 13088_39_↓Weighted   | 11  | -0.04445 | 0.189751 | 0.819528 |
| 13093_6_§finngen_R outcome  | 13093_6_§MR Egger    | 15  | 0.237261 | 0.268629 | 0.393152 |
| 13093_6_§finngen_R outcome  | 13093_6_§Weighted    | 15  | 0.345123 | 0.140299 | 0.013897 |
| 13093_6_§finngen_R outcome  | 13093_6_§Inverse va  | 15  | 0.354278 | 0.11508  | 0.00208  |
| 13093_6_§finngen_R outcome  | 13093_6_§Simple mc   | 15  | 0.314562 | 0.22623  | 0.1861   |
| 13093_6_§finngen_R outcome  | 13093_6_§Weighted    | 15  | 0.328425 | 0.131008 | 0.025129 |
| 13094_75_finngen_R outcome  | 13094_75_MR Egger    | 17  | 0.366708 | 0.253929 | 0.169264 |
| 13094_75_finngen_R outcome  | 13094_75_Weighted    | 17  | 0.215109 | 0.13886  | 0.121357 |
| 13094_75_finngen_R outcome  | 13094_75_Inverse va  | 17  | 0.386964 | 0.108718 | 0.000372 |
| 13094_75_finngen_R outcome  | 13094_75_Simple mc   | 17  | 0.504922 | 0.220754 | 0.036139 |
| 13094_75_finngen_R outcome  | 13094_75_Weighted    | 17  | 0.25057  | 0.135385 | 0.08275  |
| 13095_51_finngen_R outcome  | 13095_51_MR Egger    | 48  | 0.119504 | 0.116129 | 0.308831 |
| 13095_51_finngen_R outcome  | 13095_51_Weighted    | 48  | 0.126597 | 0.093772 | 0.177003 |
| 13095_51_finngen_R outcome  | 13095_51_Inverse va  | 48  | 0.142354 | 0.064008 | 0.026149 |
| 13095_51_finngen_R outcome  | 13095_51_Simple mc   | 48  | 0.125362 | 0.181319 | 0.492721 |
| 13095_51_finngen_R outcome  | 13095_51_Weighted    | 48  | 0.192167 | 0.109851 | 0.08676  |
| 13109_82_finngen_R outcome  | 13109_82_MR Egger    | 10  | 0.362859 | 0.517523 | 0.503093 |
| 13109_82_finngen_R outcome  | 13109_82_Weighted    | 10  | 0.028447 | 0.224903 | 0.899347 |
| 13109_82_finngen_R outcome  | 13109_82_Inverse va  | 10  | 0.055353 | 0.164344 | 0.73626  |
| 13109_82_finngen_R outcome  | 13109_82_Simple mc   | 10  | 0.288346 | 0.331507 | 0.407007 |
| 13109_82_finngen_R outcome  | 13109_82_Weighted    | 10  | 0.05135  | 0.240687 | 0.835809 |
| 13112_17_‡finngen_R outcome | 13112_17_‡MR Egger   | 8   | 0.285053 | 0.81162  | 0.737431 |
| 13112_17_‡finngen_R outcome | 13112_17_‡Weighted   | 8   | 0.380898 | 0.21158  | 0.071821 |
| 13112_17_‡finngen_R outcome | 13112_17_‡Inverse va | 8   | 0.36645  | 0.224981 | 0.103354 |
| 13112_17_‡finngen_R outcome | 13112_17_‡Simple mc  | 8   | 0.046297 | 0.490812 | 0.927493 |
| 13112_17_‡finngen_R outcome | 13112_17_‡Weighted   | 8   | 0.470438 | 0.238527 | 0.089194 |
| 13113_7_§finngen_R outcome  | 13113_7_§MR Egger    | 8   | -0.52176 | 0.802635 | 0.539729 |
| 13113_7_§finngen_R outcome  | 13113_7_§Weighted    | 8   | 0.165322 | 0.288849 | 0.567087 |

|                            |                     |     |          |          |          |
|----------------------------|---------------------|-----|----------|----------|----------|
| 13113_7_§finngen_R outcome | 13113_7_§Inverse va | 8   | 0.17158  | 0.244437 | 0.482719 |
| 13113_7_§finngen_R outcome | 13113_7_§Simple mc  | 8   | 0.653921 | 0.489135 | 0.223069 |
| 13113_7_§finngen_R outcome | 13113_7_§Weighted   | 8   | 0.583621 | 0.478436 | 0.26202  |
| 13114_50_finngen_R outcome | 13114_50_MR Egger   | 17  | 0.210939 | 0.181289 | 0.26278  |
| 13114_50_finngen_R outcome | 13114_50_Weighted   | 17  | 0.14728  | 0.156661 | 0.347155 |
| 13114_50_finngen_R outcome | 13114_50_Inverse va | 17  | 0.084012 | 0.113018 | 0.457269 |
| 13114_50_finngen_R outcome | 13114_50_Simple mc  | 17  | 0.154013 | 0.256387 | 0.55645  |
| 13114_50_finngen_R outcome | 13114_50_Weighted   | 17  | 0.17662  | 0.185244 | 0.354547 |
| 13116_25_finngen_R outcome | 13116_25_MR Egger   | 126 | -0.09278 | 0.038119 | 0.016366 |
| 13116_25_finngen_R outcome | 13116_25_Weighted   | 126 | -0.0303  | 0.033292 | 0.362823 |
| 13116_25_finngen_R outcome | 13116_25_Inverse va | 126 | -0.0643  | 0.023283 | 0.005748 |
| 13116_25_finngen_R outcome | 13116_25_Simple mc  | 126 | -0.00375 | 0.065624 | 0.954462 |
| 13116_25_finngen_R outcome | 13116_25_Weighted   | 126 | -0.03905 | 0.031868 | 0.222694 |
| 13118_5_§finngen_R outcome | 13118_5_§MR Egger   | 21  | 0.188429 | 0.237248 | 0.436872 |
| 13118_5_§finngen_R outcome | 13118_5_§Weighted   | 21  | -0.10261 | 0.140428 | 0.464978 |
| 13118_5_§finngen_R outcome | 13118_5_§Inverse va | 21  | -0.07559 | 0.097871 | 0.439894 |
| 13118_5_§finngen_R outcome | 13118_5_§Simple mc  | 21  | -0.31533 | 0.237272 | 0.19882  |
| 13118_5_§finngen_R outcome | 13118_5_§Weighted   | 21  | -0.19753 | 0.186397 | 0.301898 |
| 13119_26_finngen_R outcome | 13119_26_MR Egger   | 119 | 0.111655 | 0.04756  | 0.020571 |
| 13119_26_finngen_R outcome | 13119_26_Weighted   | 119 | 0.085078 | 0.051847 | 0.100804 |
| 13119_26_finngen_R outcome | 13119_26_Inverse va | 119 | 0.093492 | 0.029684 | 0.001635 |
| 13119_26_finngen_R outcome | 13119_26_Simple mc  | 119 | 0.119971 | 0.098686 | 0.226532 |
| 13119_26_finngen_R outcome | 13119_26_Weighted   | 119 | 0.106924 | 0.048471 | 0.029327 |
| 13122_19_finngen_R outcome | 13122_19_MR Egger   | 43  | -0.01422 | 0.178546 | 0.936923 |
| 13122_19_finngen_R outcome | 13122_19_Weighted   | 43  | -0.0122  | 0.115109 | 0.915582 |
| 13122_19_finngen_R outcome | 13122_19_Inverse va | 43  | -0.01276 | 0.081015 | 0.874827 |
| 13122_19_finngen_R outcome | 13122_19_Simple mc  | 43  | 0.10597  | 0.191596 | 0.583132 |
| 13122_19_finngen_R outcome | 13122_19_Weighted   | 43  | 0.027187 | 0.123634 | 0.827018 |
| 13124_20_finngen_R outcome | 13124_20_MR Egger   | 32  | 0.13753  | 0.248075 | 0.583422 |
| 13124_20_finngen_R outcome | 13124_20_Weighted   | 32  | 0.093709 | 0.136361 | 0.49195  |
| 13124_20_finngen_R outcome | 13124_20_Inverse va | 32  | -0.08964 | 0.10152  | 0.37726  |
| 13124_20_finngen_R outcome | 13124_20_Simple mc  | 32  | 0.040945 | 0.25415  | 0.873055 |
| 13124_20_finngen_R outcome | 13124_20_Weighted   | 32  | 0.081003 | 0.144464 | 0.579024 |
| 13133_73_finngen_R outcome | 13133_73_Inverse va | 2   | -0.03067 | 0.256904 | 0.904974 |
| 13381_49_finngen_R outcome | 13381_49_MR Egger   | 13  | -0.0901  | 0.261504 | 0.736924 |
| 13381_49_finngen_R outcome | 13381_49_Weighted   | 13  | -0.13333 | 0.157182 | 0.396301 |
| 13381_49_finngen_R outcome | 13381_49_Inverse va | 13  | -0.1226  | 0.135259 | 0.36474  |
| 13381_49_finngen_R outcome | 13381_49_Simple mc  | 13  | -0.2891  | 0.238703 | 0.249163 |
| 13381_49_finngen_R outcome | 13381_49_Weighted   | 13  | -0.14476 | 0.149067 | 0.35065  |
| 13388_57_finngen_R outcome | 13388_57_MR Egger   | 124 | 0.113202 | 0.048788 | 0.021986 |
| 13388_57_finngen_R outcome | 13388_57_Weighted   | 124 | 0.079294 | 0.044377 | 0.073962 |
| 13388_57_finngen_R outcome | 13388_57_Inverse va | 124 | 0.071007 | 0.027666 | 0.010272 |
| 13388_57_finngen_R outcome | 13388_57_Simple mc  | 124 | -0.03012 | 0.086367 | 0.727913 |
| 13388_57_finngen_R outcome | 13388_57_Weighted   | 124 | 0.042561 | 0.043242 | 0.326915 |
| 13397_88_finngen_R outcome | 13397_88_MR Egger   | 20  | 0.520225 | 0.373758 | 0.180921 |
| 13397_88_finngen_R outcome | 13397_88_Weighted   | 20  | -0.25754 | 0.215314 | 0.231642 |
| 13397_88_finngen_R outcome | 13397_88_Inverse va | 20  | -0.21225 | 0.193688 | 0.273142 |
| 13397_88_finngen_R outcome | 13397_88_Simple mc  | 20  | -0.49701 | 0.443741 | 0.27665  |
| 13397_88_finngen_R outcome | 13397_88_Weighted   | 20  | -0.2387  | 0.296886 | 0.431338 |
| 13405_61_finngen_R outcome | 13405_61_MR Egger   | 47  | -0.10659 | 0.098814 | 0.286478 |
| 13405_61_finngen_R outcome | 13405_61_Weighted   | 47  | -0.0158  | 0.087877 | 0.857329 |
| 13405_61_finngen_R outcome | 13405_61_Inverse va | 47  | -0.0053  | 0.057758 | 0.926823 |
| 13405_61_finngen_R outcome | 13405_61_Simple mc  | 47  | 0.008662 | 0.143087 | 0.951991 |
| 13405_61_finngen_R outcome | 13405_61_Weighted   | 47  | -0.01494 | 0.096251 | 0.877343 |
| 13438_11‡finngen_R outcome | 13438_11‡Inverse va | 2   | 0.386583 | 0.638903 | 0.54513  |
| 13460_4_Çfinngen_R outcome | 13460_4_ÇWald ratio | 1   | -0.38125 | 0.748466 | 0.610489 |
| 13463_1_Ffinngen_R outcome | 13463_1_FMR Egger   | 11  | -0.70881 | 0.460797 | 0.158375 |
| 13463_1_Ffinngen_R outcome | 13463_1_FWeighted   | 11  | -0.17351 | 0.188358 | 0.356966 |



|                               |                        |     |          |          |          |
|-------------------------------|------------------------|-----|----------|----------|----------|
| 13463_1_F finngen_R outcome   | 13463_1_F Inverse va   | 11  | -0.16031 | 0.176478 | 0.363663 |
| 13463_1_F finngen_R outcome   | 13463_1_F Simple mc    | 11  | 0.217563 | 0.321403 | 0.513813 |
| 13463_1_F finngen_R outcome   | 13463_1_F Weighted     | 11  | -0.16001 | 0.195982 | 0.433267 |
| 13666_22_ finngen_R outcome   | 13666_22_ MR Egger     | 18  | 0.276307 | 0.128785 | 0.047604 |
| 13666_22_ finngen_R outcome   | 13666_22_ Weighted     | 18  | 0.096324 | 0.113167 | 0.394677 |
| 13666_22_ finngen_R outcome   | 13666_22_ Inverse va   | 18  | 0.048227 | 0.091988 | 0.600084 |
| 13666_22_ finngen_R outcome   | 13666_22_ Simple mc    | 18  | -0.43338 | 0.247977 | 0.098562 |
| 13666_22_ finngen_R outcome   | 13666_22_ Weighted     | 18  | 0.10567  | 0.112437 | 0.360476 |
| 13669_6_F finngen_R outcome   | 13669_6_F MR Egger     | 23  | 0.410289 | 0.33083  | 0.228587 |
| 13669_6_F finngen_R outcome   | 13669_6_F Weighted     | 23  | 0.142872 | 0.167299 | 0.39311  |
| 13669_6_F finngen_R outcome   | 13669_6_F Inverse va   | 23  | 0.15392  | 0.130485 | 0.238159 |
| 13669_6_F finngen_R outcome   | 13669_6_F Simple mc    | 23  | 0.010203 | 0.274944 | 0.970732 |
| 13669_6_F finngen_R outcome   | 13669_6_F Weighted     | 23  | 0.221251 | 0.180462 | 0.233152 |
| 13671_40_ finngen_R outcome   | 13671_40_ MR Egger     | 60  | 0.171531 | 0.098145 | 0.085804 |
| 13671_40_ finngen_R outcome   | 13671_40_ Weighted     | 60  | 0.066382 | 0.079075 | 0.401195 |
| 13671_40_ finngen_R outcome   | 13671_40_ Inverse va   | 60  | 0.049375 | 0.055942 | 0.377445 |
| 13671_40_ finngen_R outcome   | 13671_40_ Simple mc    | 60  | 0.040599 | 0.144315 | 0.779449 |
| 13671_40_ finngen_R outcome   | 13671_40_ Weighted     | 60  | 0.067304 | 0.080409 | 0.40596  |
| 13676_46_ finngen_R outcome   | 13676_46_ MR Egger     | 23  | 0.031493 | 0.129473 | 0.81018  |
| 13676_46_ finngen_R outcome   | 13676_46_ Weighted     | 23  | 0.032986 | 0.091696 | 0.719043 |
| 13676_46_ finngen_R outcome   | 13676_46_ Inverse va   | 23  | 0.061869 | 0.069235 | 0.371535 |
| 13676_46_ finngen_R outcome   | 13676_46_ Simple mc    | 23  | 0.127214 | 0.199914 | 0.531118 |
| 13676_46_ finngen_R outcome   | 13676_46_ Weighted     | 23  | 0.030589 | 0.089105 | 0.734639 |
| 13682_47_ finngen_R outcome   | 13682_47_ MR Egger     | 10  | 0.5267   | 0.534885 | 0.353613 |
| 13682_47_ finngen_R outcome   | 13682_47_ Weighted     | 10  | 0.236049 | 0.232207 | 0.30937  |
| 13682_47_ finngen_R outcome   | 13682_47_ Inverse va   | 10  | -0.05902 | 0.177841 | 0.73999  |
| 13682_47_ finngen_R outcome   | 13682_47_ Simple mc    | 10  | 0.33327  | 0.384086 | 0.408101 |
| 13682_47_ finngen_R outcome   | 13682_47_ Weighted     | 10  | 0.288547 | 0.293291 | 0.350909 |
| 13686_2_ II finngen_R outcome | 13686_2_ II MR Egger   | 86  | -0.05522 | 0.063609 | 0.387797 |
| 13686_2_ II finngen_R outcome | 13686_2_ II Weighted   | 86  | -0.09232 | 0.054417 | 0.089778 |
| 13686_2_ II finngen_R outcome | 13686_2_ II Inverse va | 86  | -0.02696 | 0.036957 | 0.465754 |
| 13686_2_ II finngen_R outcome | 13686_2_ II Simple mc  | 86  | -0.0869  | 0.101133 | 0.392602 |
| 13686_2_ II finngen_R outcome | 13686_2_ II Weighted   | 86  | -0.09899 | 0.061987 | 0.11398  |
| 13692_15_ finngen_R outcome   | 13692_15_ MR Egger     | 125 | -0.11759 | 0.056069 | 0.038021 |
| 13692_15_ finngen_R outcome   | 13692_15_ Weighted     | 125 | -0.03224 | 0.049675 | 0.516342 |
| 13692_15_ finngen_R outcome   | 13692_15_ Inverse va   | 125 | -0.01171 | 0.0313   | 0.708267 |
| 13692_15_ finngen_R outcome   | 13692_15_ Simple mc    | 125 | 0.042054 | 0.092119 | 0.648819 |
| 13692_15_ finngen_R outcome   | 13692_15_ Weighted     | 125 | -0.0425  | 0.046727 | 0.364879 |
| 13700_10_ finngen_R outcome   | 13700_10_ MR Egger     | 110 | 0.056327 | 0.051515 | 0.276649 |
| 13700_10_ finngen_R outcome   | 13700_10_ Weighted     | 110 | -0.00862 | 0.052269 | 0.86907  |
| 13700_10_ finngen_R outcome   | 13700_10_ Inverse va   | 110 | 0.037555 | 0.031478 | 0.232855 |
| 13700_10_ finngen_R outcome   | 13700_10_ Simple mc    | 110 | -0.02252 | 0.106206 | 0.832496 |
| 13700_10_ finngen_R outcome   | 13700_10_ Weighted     | 110 | 0.003672 | 0.05194  | 0.943772 |
| 13717_15_ finngen_R outcome   | 13717_15_ MR Egger     | 131 | -0.03228 | 0.042403 | 0.447939 |
| 13717_15_ finngen_R outcome   | 13717_15_ Weighted     | 131 | -0.00156 | 0.04574  | 0.972815 |
| 13717_15_ finngen_R outcome   | 13717_15_ Inverse va   | 131 | -0.03304 | 0.027436 | 0.228522 |
| 13717_15_ finngen_R outcome   | 13717_15_ Simple mc    | 131 | 0.06299  | 0.081859 | 0.442996 |
| 13717_15_ finngen_R outcome   | 13717_15_ Weighted     | 131 | -0.00995 | 0.038532 | 0.796717 |
| 13719_19_ finngen_R outcome   | 13719_19_ Wald ratio   | 1   | 0.418633 | 0.77589  | 0.589506 |
| 13720_95_ finngen_R outcome   | 13720_95_ MR Egger     | 65  | -0.065   | 0.108724 | 0.552066 |
| 13720_95_ finngen_R outcome   | 13720_95_ Weighted     | 65  | -0.0719  | 0.081984 | 0.380463 |
| 13720_95_ finngen_R outcome   | 13720_95_ Inverse va   | 65  | -0.01922 | 0.053508 | 0.719507 |
| 13720_95_ finngen_R outcome   | 13720_95_ Simple mc    | 65  | -0.20452 | 0.153975 | 0.188813 |
| 13720_95_ finngen_R outcome   | 13720_95_ Weighted     | 65  | -0.14652 | 0.109739 | 0.186546 |
| 13733_5_ II finngen_R outcome | 13733_5_ II MR Egger   | 52  | -0.06169 | 0.077195 | 0.427994 |
| 13733_5_ II finngen_R outcome | 13733_5_ II Weighted   | 52  | 0.002446 | 0.067687 | 0.971175 |
| 13733_5_ II finngen_R outcome | 13733_5_ II Inverse va | 52  | -0.00963 | 0.049831 | 0.846736 |
| 13733_5_ II finngen_R outcome | 13733_5_ II Simple mc  | 52  | 0.11     | 0.137149 | 0.426246 |

|                               |                        |     |          |          |          |
|-------------------------------|------------------------|-----|----------|----------|----------|
| 13733_5_II finngen_R outcome  | 13733_5_II Weighted    | 52  | 0.000903 | 0.064187 | 0.98883  |
| 13738_8_II finngen_R outcome  | 13738_8_II Wald ratio  | 1   | 0.368978 | 0.409441 | 0.367496 |
| 13740_51_ finngen_R outcome   | 13740_51_ MR Egger     | 55  | 0.091291 | 0.09732  | 0.352476 |
| 13740_51_ finngen_R outcome   | 13740_51_ Weighted     | 55  | 0.098694 | 0.093946 | 0.29347  |
| 13740_51_ finngen_R outcome   | 13740_51_ Inverse va   | 55  | 0.116018 | 0.055836 | 0.037723 |
| 13740_51_ finngen_R outcome   | 13740_51_ Simple mc    | 55  | 0.315271 | 0.204596 | 0.12917  |
| 13740_51_ finngen_R outcome   | 13740_51_ Weighted     | 55  | 0.094188 | 0.102138 | 0.360546 |
| 13748_4_C finngen_R outcome   | 13748_4_C MR Egger     | 159 | -0.0599  | 0.036464 | 0.102453 |
| 13748_4_C finngen_R outcome   | 13748_4_C Weighted     | 159 | -0.04907 | 0.038956 | 0.207772 |
| 13748_4_C finngen_R outcome   | 13748_4_C Inverse va   | 159 | -0.07535 | 0.023891 | 0.00161  |
| 13748_4_C finngen_R outcome   | 13748_4_C Simple mc    | 159 | -0.05656 | 0.076514 | 0.460901 |
| 13748_4_C finngen_R outcome   | 13748_4_C Weighted     | 159 | -0.06728 | 0.034753 | 0.054676 |
| 13930_3_ f finngen_R outcome  | 13930_3_ f MR Egger    | 4   | 0.158231 | 0.74866  | 0.852193 |
| 13930_3_ f finngen_R outcome  | 13930_3_ f Weighted    | 4   | 0.055876 | 0.244156 | 0.818982 |
| 13930_3_ f finngen_R outcome  | 13930_3_ f Inverse va  | 4   | 0.0958   | 0.217076 | 0.658981 |
| 13930_3_ f finngen_R outcome  | 13930_3_ f Simple mc   | 4   | 0.000212 | 0.338402 | 0.99954  |
| 13930_3_ f finngen_R outcome  | 13930_3_ f Weighted    | 4   | 0.015907 | 0.286659 | 0.959235 |
| 13944_3_ S finngen_R outcome  | 13944_3_ S MR Egger    | 17  | -0.29288 | 0.272357 | 0.299217 |
| 13944_3_ S finngen_R outcome  | 13944_3_ S Weighted    | 17  | -0.0699  | 0.169124 | 0.679391 |
| 13944_3_ S finngen_R outcome  | 13944_3_ S Inverse va  | 17  | 0.02711  | 0.12593  | 0.829551 |
| 13944_3_ S finngen_R outcome  | 13944_3_ S Simple mc   | 17  | -0.19524 | 0.248548 | 0.443619 |
| 13944_3_ S finngen_R outcome  | 13944_3_ S Weighted    | 17  | -0.08722 | 0.197589 | 0.664807 |
| 13959_7_L finngen_R outcome   | 13959_7_L MR Egger     | 8   | 0.341886 | 0.307821 | 0.309229 |
| 13959_7_L finngen_R outcome   | 13959_7_L Weighted     | 8   | 0.072725 | 0.245608 | 0.767152 |
| 13959_7_L finngen_R outcome   | 13959_7_L Inverse va   | 8   | 0.174322 | 0.197735 | 0.377998 |
| 13959_7_L finngen_R outcome   | 13959_7_L Simple mc    | 8   | 0.068688 | 0.376207 | 0.860301 |
| 13959_7_L finngen_R outcome   | 13959_7_L Weighted     | 8   | 0.051663 | 0.305326 | 0.870421 |
| 13972_4_ f finngen_R outcome  | 13972_4_ f MR Egger    | 4   | 0.029954 | 1.533402 | 0.986188 |
| 13972_4_ f finngen_R outcome  | 13972_4_ f Weighted    | 4   | -0.05339 | 0.472594 | 0.910055 |
| 13972_4_ f finngen_R outcome  | 13972_4_ f Inverse va  | 4   | 0.005457 | 0.491947 | 0.991149 |
| 13972_4_ f finngen_R outcome  | 13972_4_ f Simple mc   | 4   | 0.813515 | 0.857434 | 0.412729 |
| 13972_4_ f finngen_R outcome  | 13972_4_ f Weighted    | 4   | -0.24177 | 0.574029 | 0.701977 |
| 13973_62_ finngen_R outcome   | 13973_62_ Wald ratio   | 1   | -0.49588 | 0.882597 | 0.57422  |
| 14047_78_ finngen_R outcome   | 14047_78_ Inverse va   | 2   | 0.304868 | 0.285972 | 0.28639  |
| 14048_7_ II finngen_R outcome | 14048_7_ II MR Egger   | 142 | 0.034753 | 0.026498 | 0.191824 |
| 14048_7_ II finngen_R outcome | 14048_7_ II Weighted   | 142 | -0.00021 | 0.032013 | 0.994648 |
| 14048_7_ II finngen_R outcome | 14048_7_ II Inverse va | 142 | 0.008171 | 0.020075 | 0.683992 |
| 14048_7_ II finngen_R outcome | 14048_7_ II Simple mc  | 142 | -0.02969 | 0.068073 | 0.663431 |
| 14048_7_ II finngen_R outcome | 14048_7_ II Weighted   | 142 | 0.007362 | 0.025231 | 0.770877 |
| 14054_17_ finngen_R outcome   | 14054_17_ MR Egger     | 86  | -0.04547 | 0.066656 | 0.496975 |
| 14054_17_ finngen_R outcome   | 14054_17_ Weighted     | 86  | -0.04603 | 0.053126 | 0.386235 |
| 14054_17_ finngen_R outcome   | 14054_17_ Inverse va   | 86  | -0.0342  | 0.035236 | 0.331807 |
| 14054_17_ finngen_R outcome   | 14054_17_ Simple mc    | 86  | -0.04055 | 0.096667 | 0.675921 |
| 14054_17_ finngen_R outcome   | 14054_17_ Weighted     | 86  | -0.04055 | 0.054168 | 0.456163 |
| 14076_74_ finngen_R outcome   | 14076_74_ MR Egger     | 42  | 0.172249 | 0.158816 | 0.2846   |
| 14076_74_ finngen_R outcome   | 14076_74_ Weighted     | 42  | 0.1536   | 0.106385 | 0.148794 |
| 14076_74_ finngen_R outcome   | 14076_74_ Inverse va   | 42  | 0.039735 | 0.079374 | 0.61665  |
| 14076_74_ finngen_R outcome   | 14076_74_ Simple mc    | 42  | 0.046363 | 0.185596 | 0.803983 |
| 14076_74_ finngen_R outcome   | 14076_74_ Weighted     | 42  | 0.123959 | 0.105614 | 0.24729  |
| 14079_14_ finngen_R outcome   | 14079_14_ MR Egger     | 71  | -0.0371  | 0.059632 | 0.535912 |
| 14079_14_ finngen_R outcome   | 14079_14_ Weighted     | 71  | -0.08172 | 0.050336 | 0.104479 |
| 14079_14_ finngen_R outcome   | 14079_14_ Inverse va   | 71  | -0.04903 | 0.032557 | 0.132098 |
| 14079_14_ finngen_R outcome   | 14079_14_ Simple mc    | 71  | -0.06895 | 0.087434 | 0.432982 |
| 14079_14_ finngen_R outcome   | 14079_14_ Weighted     | 71  | -0.07616 | 0.049459 | 0.128104 |
| 14091_42_ finngen_R outcome   | 14091_42_ MR Egger     | 40  | -0.14062 | 0.086598 | 0.112684 |
| 14091_42_ finngen_R outcome   | 14091_42_ Weighted     | 40  | -0.02744 | 0.076543 | 0.719952 |
| 14091_42_ finngen_R outcome   | 14091_42_ Inverse va   | 40  | -0.04954 | 0.053434 | 0.353828 |
| 14091_42_ finngen_R outcome   | 14091_42_ Simple mc    | 40  | -0.00895 | 0.147173 | 0.951841 |

|                             |                      |    |          |          |          |
|-----------------------------|----------------------|----|----------|----------|----------|
| 14091_42_finngen_R outcome  | 14091_42_Weighted    | 40 | -0.0811  | 0.065054 | 0.219935 |
| 14094_29_finngen_R outcome  | 14094_29_Wald ratio  | 1  | -0.19847 | 0.688745 | 0.773221 |
| 14100_63_finngen_R outcome  | 14100_63_MR Egger    | 97 | -0.1444  | 0.051357 | 0.005986 |
| 14100_63_finngen_R outcome  | 14100_63_Weighted    | 97 | -0.13564 | 0.054317 | 0.012519 |
| 14100_63_finngen_R outcome  | 14100_63_Inverse va  | 97 | -0.05042 | 0.033063 | 0.12725  |
| 14100_63_finngen_R outcome  | 14100_63_Simple mc   | 97 | 0.005831 | 0.093279 | 0.950282 |
| 14100_63_finngen_R outcome  | 14100_63_Weighted    | 97 | -0.13522 | 0.046559 | 0.004569 |
| 14101_2_C_finngen_R outcome | 14101_2_C_MR Egger   | 13 | 0.074547 | 0.154082 | 0.638007 |
| 14101_2_C_finngen_R outcome | 14101_2_C_Weighted   | 13 | 0.047314 | 0.122827 | 0.700081 |
| 14101_2_C_finngen_R outcome | 14101_2_C_Inverse va | 13 | 0.108664 | 0.094633 | 0.250862 |
| 14101_2_C_finngen_R outcome | 14101_2_C_Simple mc  | 13 | 0.062197 | 0.191095 | 0.750424 |
| 14101_2_C_finngen_R outcome | 14101_2_C_Weighted   | 13 | 0.051886 | 0.122131 | 0.678472 |
| 14111_15_finngen_R outcome  | 14111_15_Wald ratio  | 1  | 0.041198 | 0.44487  | 0.926216 |
| 14112_40_finngen_R outcome  | 14112_40_Wald ratio  | 1  | 0.12542  | 0.632635 | 0.842849 |
| 14123_34_finngen_R outcome  | 14123_34_MR Egger    | 35 | 0.035188 | 0.133407 | 0.793603 |
| 14123_34_finngen_R outcome  | 14123_34_Weighted    | 35 | 0.062837 | 0.101126 | 0.534351 |
| 14123_34_finngen_R outcome  | 14123_34_Inverse va  | 35 | 0.049545 | 0.075218 | 0.510095 |
| 14123_34_finngen_R outcome  | 14123_34_Simple mc   | 35 | 0.185511 | 0.202504 | 0.366074 |
| 14123_34_finngen_R outcome  | 14123_34_Weighted    | 35 | 0.110628 | 0.086441 | 0.209277 |
| 14133_93_finngen_R outcome  | 14133_93_MR Egger    | 64 | 0.011486 | 0.098874 | 0.907897 |
| 14133_93_finngen_R outcome  | 14133_93_Weighted    | 64 | -0.03421 | 0.069238 | 0.621274 |
| 14133_93_finngen_R outcome  | 14133_93_Inverse va  | 64 | -0.02562 | 0.043856 | 0.559129 |
| 14133_93_finngen_R outcome  | 14133_93_Simple mc   | 64 | -0.09104 | 0.110367 | 0.412532 |
| 14133_93_finngen_R outcome  | 14133_93_Weighted    | 64 | -0.04337 | 0.068784 | 0.53064  |
| 14151_4_!_finngen_R outcome | 14151_4_!_MR Egger   | 25 | 0.116163 | 0.159285 | 0.473193 |
| 14151_4_!_finngen_R outcome | 14151_4_!_Weighted   | 25 | 0.133756 | 0.101004 | 0.185417 |
| 14151_4_!_finngen_R outcome | 14151_4_!_Inverse va | 25 | 0.132325 | 0.076839 | 0.085049 |
| 14151_4_!_finngen_R outcome | 14151_4_!_Simple mc  | 25 | 0.042601 | 0.22834  | 0.853566 |
| 14151_4_!_finngen_R outcome | 14151_4_!_Weighted   | 25 | 0.128791 | 0.095408 | 0.189647 |
| 14273_19_finngen_R outcome  | 14273_19_MR Egger    | 15 | 0.064618 | 0.328845 | 0.847257 |
| 14273_19_finngen_R outcome  | 14273_19_Weighted    | 15 | 0.08271  | 0.178481 | 0.643072 |
| 14273_19_finngen_R outcome  | 14273_19_Inverse va  | 15 | 0.012902 | 0.134744 | 0.923717 |
| 14273_19_finngen_R outcome  | 14273_19_Simple mc   | 15 | -0.0997  | 0.343149 | 0.775664 |
| 14273_19_finngen_R outcome  | 14273_19_Weighted    | 15 | 0.070252 | 0.199563 | 0.73006  |
| 14684_17_finngen_R outcome  | 14684_17_MR Egger    | 14 | 0.234369 | 0.179827 | 0.216924 |
| 14684_17_finngen_R outcome  | 14684_17_Weighted    | 14 | 0.161489 | 0.157337 | 0.304708 |
| 14684_17_finngen_R outcome  | 14684_17_Inverse va  | 14 | 0.149583 | 0.123675 | 0.226479 |
| 14684_17_finngen_R outcome  | 14684_17_Simple mc   | 14 | 0.081492 | 0.246043 | 0.745765 |
| 14684_17_finngen_R outcome  | 14684_17_Weighted    | 14 | 0.153792 | 0.163372 | 0.363685 |
| 14688_6_F_finngen_R outcome | 14688_6_F_MR Egger   | 3  | 3.303065 | 4.263059 | 0.580345 |
| 14688_6_F_finngen_R outcome | 14688_6_F_Weighted   | 3  | -0.35239 | 0.507312 | 0.487296 |
| 14688_6_F_finngen_R outcome | 14688_6_F_Inverse va | 3  | -0.27638 | 0.472245 | 0.558379 |
| 14688_6_F_finngen_R outcome | 14688_6_F_Simple mc  | 3  | -0.34378 | 0.571878 | 0.608803 |
| 14688_6_F_finngen_R outcome | 14688_6_F_Weighted   | 3  | -0.36219 | 0.545259 | 0.574861 |
| 14708_59_finngen_R outcome  | 14708_59_MR Egger    | 77 | 0.130055 | 0.082096 | 0.117362 |
| 14708_59_finngen_R outcome  | 14708_59_Weighted    | 77 | 0.114818 | 0.081948 | 0.161182 |
| 14708_59_finngen_R outcome  | 14708_59_Inverse va  | 77 | 0.064878 | 0.046776 | 0.165448 |
| 14708_59_finngen_R outcome  | 14708_59_Simple mc   | 77 | 0.110827 | 0.131636 | 0.402475 |
| 14708_59_finngen_R outcome  | 14708_59_Weighted    | 77 | 0.121235 | 0.077915 | 0.123866 |
| 14711_27_finngen_R outcome  | 14711_27_MR Egger    | 6  | -0.0107  | 0.246252 | 0.967438 |
| 14711_27_finngen_R outcome  | 14711_27_Weighted    | 6  | -0.06962 | 0.187982 | 0.711116 |
| 14711_27_finngen_R outcome  | 14711_27_Inverse va  | 6  | -0.16347 | 0.163287 | 0.316761 |
| 14711_27_finngen_R outcome  | 14711_27_Simple mc   | 6  | -0.33675 | 0.376357 | 0.411909 |
| 14711_27_finngen_R outcome  | 14711_27_Weighted    | 6  | -0.04189 | 0.189059 | 0.833399 |
| 14747_9_C_finngen_R outcome | 14747_9_C_MR Egger   | 27 | 0.063746 | 0.188625 | 0.738221 |
| 14747_9_C_finngen_R outcome | 14747_9_C_Weighted   | 27 | 0.092218 | 0.125438 | 0.462237 |
| 14747_9_C_finngen_R outcome | 14747_9_C_Inverse va | 27 | 0.124544 | 0.089954 | 0.166197 |
| 14747_9_C_finngen_R outcome | 14747_9_C_Simple mc  | 27 | 0.164574 | 0.191588 | 0.398192 |

|                              |                       |    |          |          |          |
|------------------------------|-----------------------|----|----------|----------|----------|
| 14747_9_C finngen_R outcome  | 14747_9_C Weighted    | 27 | 0.105555 | 0.130152 | 0.424722 |
| 15304_1_F finngen_R outcome  | 15304_1_F MR Egger    | 34 | 0.108085 | 0.143979 | 0.458318 |
| 15304_1_F finngen_R outcome  | 15304_1_F Weighted    | 34 | 0.144773 | 0.112828 | 0.199446 |
| 15304_1_F finngen_R outcome  | 15304_1_F Inverse va  | 34 | 0.098315 | 0.076137 | 0.196602 |
| 15304_1_F finngen_R outcome  | 15304_1_F Simple mc   | 34 | 0.033304 | 0.19565  | 0.865873 |
| 15304_1_F finngen_R outcome  | 15304_1_F Weighted    | 34 | 0.179489 | 0.129279 | 0.174321 |
| 15305_7_S finngen_R outcome  | 15305_7_S MR Egger    | 3  | -1.29774 | 2.890326 | 0.731335 |
| 15305_7_S finngen_R outcome  | 15305_7_S Weighted    | 3  | -0.86908 | 0.453862 | 0.055512 |
| 15305_7_S finngen_R outcome  | 15305_7_S Inverse va  | 3  | -1.03116 | 0.401504 | 0.010221 |
| 15305_7_S finngen_R outcome  | 15305_7_S Simple mc   | 3  | -0.8571  | 0.537728 | 0.251981 |
| 15305_7_S finngen_R outcome  | 15305_7_S Weighted    | 3  | -0.8249  | 0.473221 | 0.223428 |
| 15308_10_f finngen_R outcome | 15308_10_f MR Egger   | 44 | 0.063142 | 0.131434 | 0.633431 |
| 15308_10_f finngen_R outcome | 15308_10_f Weighted   | 44 | 0.098369 | 0.104294 | 0.345587 |
| 15308_10_f finngen_R outcome | 15308_10_f Inverse va | 44 | 0.161506 | 0.068411 | 0.018235 |
| 15308_10_f finngen_R outcome | 15308_10_f Simple mc  | 44 | 0.136322 | 0.176588 | 0.44435  |
| 15308_10_f finngen_R outcome | 15308_10_f Weighted   | 44 | 0.146433 | 0.120862 | 0.232294 |
| 15333_11_ finngen_R outcome  | 15333_11_ MR Egger    | 20 | 0.099206 | 0.256622 | 0.703597 |
| 15333_11_ finngen_R outcome  | 15333_11_ Weighted    | 20 | 0.13344  | 0.129302 | 0.302071 |
| 15333_11_ finngen_R outcome  | 15333_11_ Inverse va  | 20 | 0.115828 | 0.102684 | 0.259317 |
| 15333_11_ finngen_R outcome  | 15333_11_ Simple mc   | 20 | 0.023282 | 0.24058  | 0.923919 |
| 15333_11_ finngen_R outcome  | 15333_11_ Weighted    | 20 | 0.081472 | 0.143398 | 0.576584 |
| 15343_33_f finngen_R outcome | 15343_33_f MR Egger   | 45 | -0.08058 | 0.081295 | 0.327126 |
| 15343_33_f finngen_R outcome | 15343_33_f Weighted   | 45 | -0.01983 | 0.071201 | 0.78065  |
| 15343_33_f finngen_R outcome | 15343_33_f Inverse va | 45 | 0.040906 | 0.052724 | 0.437839 |
| 15343_33_f finngen_R outcome | 15343_33_f Simple mc  | 45 | 0.020686 | 0.131508 | 0.875726 |
| 15343_33_f finngen_R outcome | 15343_33_f Weighted   | 45 | -0.01367 | 0.06531  | 0.835222 |
| 15363_32_ finngen_R outcome  | 15363_32_ MR Egger    | 72 | 0.144484 | 0.048491 | 0.003965 |
| 15363_32_ finngen_R outcome  | 15363_32_ Weighted    | 72 | 0.126344 | 0.048254 | 0.008837 |
| 15363_32_ finngen_R outcome  | 15363_32_ Inverse va  | 72 | 0.09369  | 0.03337  | 0.004992 |
| 15363_32_ finngen_R outcome  | 15363_32_ Simple mc   | 72 | 0.106308 | 0.085824 | 0.219545 |
| 15363_32_ finngen_R outcome  | 15363_32_ Weighted    | 72 | 0.121727 | 0.042235 | 0.005222 |
| 15364_10_f finngen_R outcome | 15364_10_f MR Egger   | 38 | 0.065552 | 0.209754 | 0.75645  |
| 15364_10_f finngen_R outcome | 15364_10_f Weighted   | 38 | 0.031603 | 0.13532  | 0.815338 |
| 15364_10_f finngen_R outcome | 15364_10_f Inverse va | 38 | 0.064235 | 0.104259 | 0.537824 |
| 15364_10_f finngen_R outcome | 15364_10_f Simple mc  | 38 | 0.187658 | 0.294179 | 0.527464 |
| 15364_10_f finngen_R outcome | 15364_10_f Weighted   | 38 | -0.02923 | 0.20823  | 0.889128 |
| 15367_38_ finngen_R outcome  | 15367_38_ MR Egger    | 56 | -0.08009 | 0.091811 | 0.386866 |
| 15367_38_ finngen_R outcome  | 15367_38_ Weighted    | 56 | -0.08846 | 0.075761 | 0.242964 |
| 15367_38_ finngen_R outcome  | 15367_38_ Inverse va  | 56 | -0.04387 | 0.046895 | 0.349567 |
| 15367_38_ finngen_R outcome  | 15367_38_ Simple mc   | 56 | 0.030976 | 0.143441 | 0.829827 |
| 15367_38_ finngen_R outcome  | 15367_38_ Weighted    | 56 | -0.05993 | 0.077283 | 0.441368 |
| 15368_3_E finngen_R outcome  | 15368_3_E MR Egger    | 12 | -0.45865 | 0.390894 | 0.267854 |
| 15368_3_E finngen_R outcome  | 15368_3_E Weighted    | 12 | -0.23205 | 0.181897 | 0.202055 |
| 15368_3_E finngen_R outcome  | 15368_3_E Inverse va  | 12 | -0.13067 | 0.145911 | 0.370496 |
| 15368_3_E finngen_R outcome  | 15368_3_E Simple mc   | 12 | -0.0897  | 0.271923 | 0.747704 |
| 15368_3_E finngen_R outcome  | 15368_3_E Weighted    | 12 | -0.2347  | 0.197732 | 0.260246 |
| 15370_5_E finngen_R outcome  | 15370_5_E MR Egger    | 18 | 0.007409 | 0.121204 | 0.952017 |
| 15370_5_E finngen_R outcome  | 15370_5_E Weighted    | 18 | 0.009829 | 0.076508 | 0.897776 |
| 15370_5_E finngen_R outcome  | 15370_5_E Inverse va  | 18 | 0.023621 | 0.087671 | 0.787606 |
| 15370_5_E finngen_R outcome  | 15370_5_E Simple mc   | 18 | 0.160866 | 0.167453 | 0.350187 |
| 15370_5_E finngen_R outcome  | 15370_5_E Weighted    | 18 | 0.022663 | 0.065665 | 0.734225 |
| 15375_49_ finngen_R outcome  | 15375_49_ MR Egger    | 11 | -0.0749  | 0.424024 | 0.863697 |
| 15375_49_ finngen_R outcome  | 15375_49_ Weighted    | 11 | -0.06133 | 0.160286 | 0.701987 |
| 15375_49_ finngen_R outcome  | 15375_49_ Inverse va  | 11 | 0.06702  | 0.205794 | 0.744679 |
| 15375_49_ finngen_R outcome  | 15375_49_ Simple mc   | 11 | 0.336507 | 0.342173 | 0.348585 |
| 15375_49_ finngen_R outcome  | 15375_49_ Weighted    | 11 | -0.05362 | 0.160713 | 0.745563 |
| 15376_13_c finngen_R outcome | 15376_13_c MR Egger   | 12 | 0.178695 | 0.111558 | 0.140278 |
| 15376_13_c finngen_R outcome | 15376_13_c Weighted   | 12 | 0.136665 | 0.080167 | 0.088239 |

|            |                   |            |            |     |          |          |          |
|------------|-------------------|------------|------------|-----|----------|----------|----------|
| 15376_13_4 | finngen_R outcome | 15376_13_4 | Inverse va | 12  | 0.108334 | 0.073566 | 0.140856 |
| 15376_13_4 | finngen_R outcome | 15376_13_4 | Simple mc  | 12  | 0.032667 | 0.182747 | 0.861379 |
| 15376_13_4 | finngen_R outcome | 15376_13_4 | Weighted   | 12  | 0.127468 | 0.078639 | 0.133319 |
| 15384_15_  | finngen_R outcome | 15384_15_  | MR Egger   | 24  | -0.09681 | 0.184847 | 0.605713 |
| 15384_15_  | finngen_R outcome | 15384_15_  | Weighted   | 24  | -0.1441  | 0.125202 | 0.249773 |
| 15384_15_  | finngen_R outcome | 15384_15_  | Inverse va | 24  | -0.06716 | 0.091914 | 0.464947 |
| 15384_15_  | finngen_R outcome | 15384_15_  | Simple mc  | 24  | -0.15483 | 0.178382 | 0.394374 |
| 15384_15_  | finngen_R outcome | 15384_15_  | Weighted   | 24  | -0.13701 | 0.135981 | 0.324138 |
| 15385_11_6 | finngen_R outcome | 15385_11_6 | MR Egger   | 89  | -0.00452 | 0.058306 | 0.938335 |
| 15385_11_6 | finngen_R outcome | 15385_11_6 | Weighted   | 89  | -0.00135 | 0.046211 | 0.976638 |
| 15385_11_6 | finngen_R outcome | 15385_11_6 | Inverse va | 89  | -0.02201 | 0.030625 | 0.472284 |
| 15385_11_6 | finngen_R outcome | 15385_11_6 | Simple mc  | 89  | 0.020796 | 0.074096 | 0.779627 |
| 15385_11_6 | finngen_R outcome | 15385_11_6 | Weighted   | 89  | 0.007886 | 0.042199 | 0.852182 |
| 15388_24_  | finngen_R outcome | 15388_24_  | MR Egger   | 176 | 0.137299 | 0.035905 | 0.000183 |
| 15388_24_  | finngen_R outcome | 15388_24_  | Weighted   | 176 | 0.108587 | 0.030967 | 0.000454 |
| 15388_24_  | finngen_R outcome | 15388_24_  | Inverse va | 176 | 0.108086 | 0.019236 | 1.92E-08 |
| 15388_24_  | finngen_R outcome | 15388_24_  | Simple mc  | 176 | 0.054903 | 0.054818 | 0.317951 |
| 15388_24_  | finngen_R outcome | 15388_24_  | Weighted   | 176 | 0.103029 | 0.029912 | 0.000716 |
| 15391_11_4 | finngen_R outcome | 15391_11_4 | MR Egger   | 25  | -0.15083 | 0.185395 | 0.424237 |
| 15391_11_4 | finngen_R outcome | 15391_11_4 | Weighted   | 25  | -0.0255  | 0.126908 | 0.840778 |
| 15391_11_4 | finngen_R outcome | 15391_11_4 | Inverse va | 25  | -0.07508 | 0.091439 | 0.411614 |
| 15391_11_4 | finngen_R outcome | 15391_11_4 | Simple mc  | 25  | -0.00413 | 0.248605 | 0.986869 |
| 15391_11_4 | finngen_R outcome | 15391_11_4 | Weighted   | 25  | -0.01841 | 0.135787 | 0.893291 |
| 15395_15_  | finngen_R outcome | 15395_15_  | MR Egger   | 132 | -0.04311 | 0.041061 | 0.295759 |
| 15395_15_  | finngen_R outcome | 15395_15_  | Weighted   | 132 | -0.01579 | 0.043196 | 0.714764 |
| 15395_15_  | finngen_R outcome | 15395_15_  | Inverse va | 132 | -0.02864 | 0.028087 | 0.307901 |
| 15395_15_  | finngen_R outcome | 15395_15_  | Simple mc  | 132 | -0.06774 | 0.088628 | 0.446063 |
| 15395_15_  | finngen_R outcome | 15395_15_  | Weighted   | 132 | -0.03275 | 0.037661 | 0.386086 |
| 15398_2_   | finngen_R outcome | 15398_2_   | Wald ratio | 1   | -0.0328  | 0.610812 | 0.957178 |
| 15414_31_6 | finngen_R outcome | 15414_31_6 | Inverse va | 2   | -0.20508 | 0.7913   | 0.795501 |
| 15417_3_5  | finngen_R outcome | 15417_3_5  | MR Egger   | 5   | -0.01174 | 0.481624 | 0.982091 |
| 15417_3_5  | finngen_R outcome | 15417_3_5  | Weighted   | 5   | 0.183768 | 0.245546 | 0.454214 |
| 15417_3_5  | finngen_R outcome | 15417_3_5  | Inverse va | 5   | 0.165332 | 0.223373 | 0.459204 |
| 15417_3_5  | finngen_R outcome | 15417_3_5  | Simple mc  | 5   | 0.155557 | 0.360235 | 0.68813  |
| 15417_3_5  | finngen_R outcome | 15417_3_5  | Weighted   | 5   | 0.187074 | 0.264693 | 0.518713 |
| 15427_35_  | finngen_R outcome | 15427_35_  | Inverse va | 2   | -0.31385 | 0.620296 | 0.612883 |
| 15435_4_   | finngen_R outcome | 15435_4_   | MR Egger   | 10  | -0.17102 | 0.318008 | 0.605353 |
| 15435_4_   | finngen_R outcome | 15435_4_   | Weighted   | 10  | -0.1151  | 0.200983 | 0.566867 |
| 15435_4_   | finngen_R outcome | 15435_4_   | Inverse va | 10  | -0.03396 | 0.153477 | 0.824903 |
| 15435_4_   | finngen_R outcome | 15435_4_   | Simple mc  | 10  | 0.151888 | 0.305465 | 0.630942 |
| 15435_4_   | finngen_R outcome | 15435_4_   | Weighted   | 10  | -0.21546 | 0.248257 | 0.408009 |
| 15440_57_  | finngen_R outcome | 15440_57_  | MR Egger   | 5   | 1.880771 | 1.326096 | 0.251143 |
| 15440_57_  | finngen_R outcome | 15440_57_  | Weighted   | 5   | 0.491299 | 0.340919 | 0.149556 |
| 15440_57_  | finngen_R outcome | 15440_57_  | Inverse va | 5   | 0.369516 | 0.275225 | 0.179403 |
| 15440_57_  | finngen_R outcome | 15440_57_  | Simple mc  | 5   | 0.684126 | 0.472029 | 0.220838 |
| 15440_57_  | finngen_R outcome | 15440_57_  | Weighted   | 5   | 0.467806 | 0.395561 | 0.302446 |
| 15444_45_  | finngen_R outcome | 15444_45_  | MR Egger   | 13  | -0.04647 | 0.206732 | 0.826266 |
| 15444_45_  | finngen_R outcome | 15444_45_  | Weighted   | 13  | -0.07245 | 0.179749 | 0.686886 |
| 15444_45_  | finngen_R outcome | 15444_45_  | Inverse va | 13  | 0.008317 | 0.135153 | 0.950931 |
| 15444_45_  | finngen_R outcome | 15444_45_  | Simple mc  | 13  | 0.009741 | 0.282604 | 0.973071 |
| 15444_45_  | finngen_R outcome | 15444_45_  | Weighted   | 13  | -0.08558 | 0.189911 | 0.660295 |
| 15447_45_  | finngen_R outcome | 15447_45_  | MR Egger   | 33  | -0.04762 | 0.161856 | 0.770556 |
| 15447_45_  | finngen_R outcome | 15447_45_  | Weighted   | 33  | 0.021208 | 0.140176 | 0.879745 |
| 15447_45_  | finngen_R outcome | 15447_45_  | Inverse va | 33  | -0.11011 | 0.091673 | 0.229706 |
| 15447_45_  | finngen_R outcome | 15447_45_  | Simple mc  | 33  | 0.034916 | 0.236661 | 0.883634 |
| 15447_45_  | finngen_R outcome | 15447_45_  | Weighted   | 33  | 0.020834 | 0.153284 | 0.892736 |
| 15452_5_1  | finngen_R outcome | 15452_5_1  | MR Egger   | 46  | -0.21903 | 0.093641 | 0.023942 |
| 15452_5_1  | finngen_R outcome | 15452_5_1  | Weighted   | 46  | -0.11278 | 0.076709 | 0.14149  |

|                             |                      |     |          |          |          |
|-----------------------------|----------------------|-----|----------|----------|----------|
| 15452_5_↑finngen_R outcome  | 15452_5_↑Inverse va  | 46  | -0.07559 | 0.051996 | 0.146021 |
| 15452_5_↑finngen_R outcome  | 15452_5_↑Simple mc   | 46  | -0.13242 | 0.132717 | 0.32373  |
| 15452_5_↑finngen_R outcome  | 15452_5_↑Weighted    | 46  | -0.10807 | 0.077319 | 0.169055 |
| 15453_3_↓finngen_R outcome  | 15453_3_↓MR Egger    | 6   | 0.311002 | 0.839391 | 0.729789 |
| 15453_3_↓finngen_R outcome  | 15453_3_↓Weighted    | 6   | 0.065531 | 0.284904 | 0.818082 |
| 15453_3_↓finngen_R outcome  | 15453_3_↓Inverse va  | 6   | -0.0807  | 0.244696 | 0.741542 |
| 15453_3_↓finngen_R outcome  | 15453_3_↓Simple mc   | 6   | -0.01209 | 0.45629  | 0.979889 |
| 15453_3_↓finngen_R outcome  | 15453_3_↓Weighted    | 6   | 0.051157 | 0.316869 | 0.878065 |
| 15462_28_finngen_R outcome  | 15462_28_MR Egger    | 31  | -0.22504 | 0.133552 | 0.102716 |
| 15462_28_finngen_R outcome  | 15462_28_Weighted    | 31  | -0.04865 | 0.109382 | 0.656479 |
| 15462_28_finngen_R outcome  | 15462_28_Inverse va  | 31  | 0.06798  | 0.090874 | 0.454421 |
| 15462_28_finngen_R outcome  | 15462_28_Simple mc   | 31  | -0.06537 | 0.218517 | 0.766869 |
| 15462_28_finngen_R outcome  | 15462_28_Weighted    | 31  | -0.10737 | 0.118932 | 0.373811 |
| 15466_30_finngen_R outcome  | 15466_30_MR Egger    | 5   | -0.34293 | 1.720467 | 0.854754 |
| 15466_30_finngen_R outcome  | 15466_30_Weighted    | 5   | -0.55689 | 0.35474  | 0.116448 |
| 15466_30_finngen_R outcome  | 15466_30_Inverse va  | 5   | -0.6571  | 0.30149  | 0.029293 |
| 15466_30_finngen_R outcome  | 15466_30_Simple mc   | 5   | -0.51207 | 0.476051 | 0.34263  |
| 15466_30_finngen_R outcome  | 15466_30_Weighted    | 5   | -0.4504  | 0.451331 | 0.37479  |
| 15468_14_finngen_R outcome  | 15468_14_MR Egger    | 61  | 0.060839 | 0.066985 | 0.367439 |
| 15468_14_finngen_R outcome  | 15468_14_Weighted    | 61  | 0.061416 | 0.056113 | 0.273734 |
| 15468_14_finngen_R outcome  | 15468_14_Inverse va  | 61  | 0.026803 | 0.040183 | 0.504759 |
| 15468_14_finngen_R outcome  | 15468_14_Simple mc   | 61  | 0.055305 | 0.088076 | 0.532439 |
| 15468_14_finngen_R outcome  | 15468_14_Weighted    | 61  | 0.049586 | 0.04906  | 0.316207 |
| 15471_29_finngen_R outcome  | 15471_29_MR Egger    | 149 | -0.099   | 0.043017 | 0.022769 |
| 15471_29_finngen_R outcome  | 15471_29_Weighted    | 149 | -0.02341 | 0.042245 | 0.579477 |
| 15471_29_finngen_R outcome  | 15471_29_Inverse va  | 149 | -0.0654  | 0.025538 | 0.010446 |
| 15471_29_finngen_R outcome  | 15471_29_Simple mc   | 149 | -0.22354 | 0.089634 | 0.013733 |
| 15471_29_finngen_R outcome  | 15471_29_Weighted    | 149 | -0.07195 | 0.042824 | 0.095031 |
| 15475_4_↓finngen_R outcome  | 15475_4_↓MR Egger    | 78  | 0.11122  | 0.078806 | 0.162235 |
| 15475_4_↓finngen_R outcome  | 15475_4_↓Weighted    | 78  | 0.092849 | 0.069695 | 0.182787 |
| 15475_4_↓finngen_R outcome  | 15475_4_↓Inverse va  | 78  | 0.119351 | 0.043399 | 0.005958 |
| 15475_4_↓finngen_R outcome  | 15475_4_↓Simple mc   | 78  | 0.181442 | 0.130876 | 0.169636 |
| 15475_4_↓finngen_R outcome  | 15475_4_↓Weighted    | 78  | 0.11768  | 0.065078 | 0.074467 |
| 15476_6_↓finngen_R outcome  | 15476_6_↓MR Egger    | 86  | -0.07892 | 0.057069 | 0.170348 |
| 15476_6_↓finngen_R outcome  | 15476_6_↓Weighted    | 86  | -0.13361 | 0.053957 | 0.013278 |
| 15476_6_↓finngen_R outcome  | 15476_6_↓Inverse va  | 86  | -0.08846 | 0.034212 | 0.00972  |
| 15476_6_↓finngen_R outcome  | 15476_6_↓Simple mc   | 86  | -0.13116 | 0.096403 | 0.177263 |
| 15476_6_↓finngen_R outcome  | 15476_6_↓Weighted    | 86  | -0.11264 | 0.046499 | 0.017537 |
| 15481_45_finngen_R outcome  | 15481_45_Wald ratio  | 1   | -0.24031 | 0.384131 | 0.531589 |
| 15483_37_↓finngen_R outcome | 15483_37_↓MR Egger   | 29  | 0.1128   | 0.168603 | 0.509158 |
| 15483_37_↓finngen_R outcome | 15483_37_↓Weighted   | 29  | -0.04335 | 0.114685 | 0.705461 |
| 15483_37_↓finngen_R outcome | 15483_37_↓Inverse va | 29  | -0.07312 | 0.078715 | 0.352941 |
| 15483_37_↓finngen_R outcome | 15483_37_↓Simple mc  | 29  | 0.043119 | 0.183493 | 0.815925 |
| 15483_37_↓finngen_R outcome | 15483_37_↓Weighted   | 29  | -0.01384 | 0.115078 | 0.905125 |
| 15486_12_↓finngen_R outcome | 15486_12_↓MR Egger   | 191 | -0.02024 | 0.033094 | 0.541518 |
| 15486_12_↓finngen_R outcome | 15486_12_↓Weighted   | 191 | -0.02252 | 0.034118 | 0.509134 |
| 15486_12_↓finngen_R outcome | 15486_12_↓Inverse va | 191 | -0.0044  | 0.021344 | 0.83652  |
| 15486_12_↓finngen_R outcome | 15486_12_↓Simple mc  | 191 | -0.05751 | 0.064284 | 0.372107 |
| 15486_12_↓finngen_R outcome | 15486_12_↓Weighted   | 191 | -0.00369 | 0.03155  | 0.907008 |
| 15487_16_↓finngen_R outcome | 15487_16_↓Wald ratio | 1   | -0.29814 | 0.682436 | 0.662202 |
| 15491_20_finngen_R outcome  | 15491_20_Inverse va  | 2   | -0.18429 | 0.320049 | 0.564746 |
| 15494_11_finngen_R outcome  | 15494_11_MR Egger    | 4   | 0.066268 | 0.857711 | 0.945449 |
| 15494_11_finngen_R outcome  | 15494_11_Weighted    | 4   | -0.53639 | 0.391573 | 0.170739 |
| 15494_11_finngen_R outcome  | 15494_11_Inverse va  | 4   | -0.46092 | 0.322887 | 0.153438 |
| 15494_11_finngen_R outcome  | 15494_11_Simple mc   | 4   | -0.55253 | 0.49867  | 0.348707 |
| 15494_11_finngen_R outcome  | 15494_11_Weighted    | 4   | -0.57103 | 0.450201 | 0.294141 |
| 15495_9_↓finngen_R outcome  | 15495_9_↓MR Egger    | 77  | 0.020588 | 0.034932 | 0.557383 |
| 15495_9_↓finngen_R outcome  | 15495_9_↓Weighted    | 77  | 0.020497 | 0.034333 | 0.550498 |

|                             |                      |     |          |          |          |
|-----------------------------|----------------------|-----|----------|----------|----------|
| 15495_9_F finngen_R outcome | 15495_9_F Inverse va | 77  | 0.01553  | 0.023942 | 0.516585 |
| 15495_9_F finngen_R outcome | 15495_9_F Simple mc  | 77  | 0.03131  | 0.050179 | 0.534513 |
| 15495_9_F finngen_R outcome | 15495_9_F Weighted   | 77  | 0.0237   | 0.032387 | 0.466554 |
| 15499_11_ finngen_R outcome | 15499_11_ MR Egger   | 57  | 0.049138 | 0.056603 | 0.389108 |
| 15499_11_ finngen_R outcome | 15499_11_ Weighted   | 57  | 0.017696 | 0.056491 | 0.754087 |
| 15499_11_ finngen_R outcome | 15499_11_ Inverse va | 57  | -0.01328 | 0.04098  | 0.745933 |
| 15499_11_ finngen_R outcome | 15499_11_ Simple mc  | 57  | -0.02715 | 0.109552 | 0.805189 |
| 15499_11_ finngen_R outcome | 15499_11_ Weighted   | 57  | -0.00076 | 0.048144 | 0.987425 |
| 15503_15_ finngen_R outcome | 15503_15_ MR Egger   | 16  | 0.137982 | 0.312688 | 0.665751 |
| 15503_15_ finngen_R outcome | 15503_15_ Weighted   | 16  | 0.153896 | 0.168854 | 0.362075 |
| 15503_15_ finngen_R outcome | 15503_15_ Inverse va | 16  | 0.240389 | 0.125624 | 0.055676 |
| 15503_15_ finngen_R outcome | 15503_15_ Simple mc  | 16  | 0.257662 | 0.241603 | 0.303078 |
| 15503_15_ finngen_R outcome | 15503_15_ Weighted   | 16  | 0.151593 | 0.158722 | 0.354675 |
| 15503_20_ finngen_R outcome | 15503_20_ MR Egger   | 115 | 0.031596 | 0.041002 | 0.44256  |
| 15503_20_ finngen_R outcome | 15503_20_ Weighted   | 115 | 0.014493 | 0.042842 | 0.735154 |
| 15503_20_ finngen_R outcome | 15503_20_ Inverse va | 115 | 0.019041 | 0.024736 | 0.441428 |
| 15503_20_ finngen_R outcome | 15503_20_ Simple mc  | 115 | 0.006079 | 0.064929 | 0.925573 |
| 15503_20_ finngen_R outcome | 15503_20_ Weighted   | 115 | 0.027964 | 0.034468 | 0.418877 |
| 15509_2_† finngen_R outcome | 15509_2_† MR Egger   | 50  | 0.010282 | 0.064809 | 0.874615 |
| 15509_2_† finngen_R outcome | 15509_2_† Weighted   | 50  | 0.01724  | 0.053299 | 0.746347 |
| 15509_2_† finngen_R outcome | 15509_2_† Inverse va | 50  | 0.025937 | 0.047978 | 0.58878  |
| 15509_2_† finngen_R outcome | 15509_2_† Simple mc  | 50  | -0.00669 | 0.111727 | 0.952486 |
| 15509_2_† finngen_R outcome | 15509_2_† Weighted   | 50  | 0.018686 | 0.04578  | 0.684931 |
| 15513_10‡ finngen_R outcome | 15513_10‡ MR Egger   | 4   | -0.66373 | 0.596005 | 0.38133  |
| 15513_10‡ finngen_R outcome | 15513_10‡ Weighted   | 4   | -0.16192 | 0.342616 | 0.636503 |
| 15513_10‡ finngen_R outcome | 15513_10‡ Inverse va | 4   | -0.16191 | 0.296609 | 0.585159 |
| 15513_10‡ finngen_R outcome | 15513_10‡ Simple mc  | 4   | -0.02499 | 0.489657 | 0.962498 |
| 15513_10‡ finngen_R outcome | 15513_10‡ Weighted   | 4   | -0.16076 | 0.434136 | 0.735763 |
| 15514_26_ finngen_R outcome | 15514_26_ MR Egger   | 52  | -0.12764 | 0.075188 | 0.095807 |
| 15514_26_ finngen_R outcome | 15514_26_ Weighted   | 52  | -0.08595 | 0.062976 | 0.172333 |
| 15514_26_ finngen_R outcome | 15514_26_ Inverse va | 52  | -0.03994 | 0.04305  | 0.353563 |
| 15514_26_ finngen_R outcome | 15514_26_ Simple mc  | 52  | 0.061054 | 0.120226 | 0.613767 |
| 15514_26_ finngen_R outcome | 15514_26_ Weighted   | 52  | -0.04991 | 0.060078 | 0.40996  |
| 15515_2_§ finngen_R outcome | 15515_2_§ MR Egger   | 51  | 0.092383 | 0.112549 | 0.415723 |
| 15515_2_§ finngen_R outcome | 15515_2_§ Weighted   | 51  | 0.07492  | 0.097116 | 0.440442 |
| 15515_2_§ finngen_R outcome | 15515_2_§ Inverse va | 51  | 0.065547 | 0.064255 | 0.307681 |
| 15515_2_§ finngen_R outcome | 15515_2_§ Simple mc  | 51  | -0.04811 | 0.18042  | 0.790821 |
| 15515_2_§ finngen_R outcome | 15515_2_§ Weighted   | 51  | 0.053186 | 0.097143 | 0.586473 |
| 15516_12_ finngen_R outcome | 15516_12_ MR Egger   | 93  | -0.1419  | 0.037913 | 0.000318 |
| 15516_12_ finngen_R outcome | 15516_12_ Weighted   | 93  | -0.07107 | 0.036877 | 0.053938 |
| 15516_12_ finngen_R outcome | 15516_12_ Inverse va | 93  | -0.05022 | 0.025036 | 0.044856 |
| 15516_12_ finngen_R outcome | 15516_12_ Simple mc  | 93  | -0.05705 | 0.066245 | 0.391357 |
| 15516_12_ finngen_R outcome | 15516_12_ Weighted   | 93  | -0.08904 | 0.036695 | 0.0172   |
| 15521_4_¶ finngen_R outcome | 15521_4_¶ MR Egger   | 20  | 0.034733 | 0.143549 | 0.811544 |
| 15521_4_¶ finngen_R outcome | 15521_4_¶ Weighted   | 20  | 0.066137 | 0.124134 | 0.594181 |
| 15521_4_¶ finngen_R outcome | 15521_4_¶ Inverse va | 20  | -0.02127 | 0.09567  | 0.824092 |
| 15521_4_¶ finngen_R outcome | 15521_4_¶ Simple mc  | 20  | -0.26288 | 0.210914 | 0.227763 |
| 15521_4_¶ finngen_R outcome | 15521_4_¶ Weighted   | 20  | -0.0423  | 0.14448  | 0.772868 |
| 15525_29‡ finngen_R outcome | 15525_29‡ MR Egger   | 5   | 1.538553 | 0.587303 | 0.079023 |
| 15525_29‡ finngen_R outcome | 15525_29‡ Weighted   | 5   | 0.139169 | 0.248704 | 0.575767 |
| 15525_29‡ finngen_R outcome | 15525_29‡ Inverse va | 5   | -0.03399 | 0.30296  | 0.91067  |
| 15525_29‡ finngen_R outcome | 15525_29‡ Simple mc  | 5   | -0.03882 | 0.389815 | 0.925466 |
| 15525_29‡ finngen_R outcome | 15525_29‡ Weighted   | 5   | 0.174762 | 0.233014 | 0.494956 |
| 15526_33_ finngen_R outcome | 15526_33_ MR Egger   | 11  | 0.047347 | 0.634563 | 0.942154 |
| 15526_33_ finngen_R outcome | 15526_33_ Weighted   | 11  | 0.020067 | 0.219191 | 0.927054 |
| 15526_33_ finngen_R outcome | 15526_33_ Inverse va | 11  | -0.01334 | 0.204122 | 0.947887 |
| 15526_33_ finngen_R outcome | 15526_33_ Simple mc  | 11  | -0.05527 | 0.306493 | 0.860499 |
| 15526_33_ finngen_R outcome | 15526_33_ Weighted   | 11  | 0.109191 | 0.268708 | 0.69304  |

|                            |                     |     |          |          |          |
|----------------------------|---------------------|-----|----------|----------|----------|
| 15530_33_finngen_R outcome | 15530_33_MR Egger   | 7   | 0.021431 | 0.682766 | 0.976174 |
| 15530_33_finngen_R outcome | 15530_33_Weighted   | 7   | -0.21477 | 0.266726 | 0.420708 |
| 15530_33_finngen_R outcome | 15530_33_Inverse va | 7   | -0.17254 | 0.20234  | 0.393826 |
| 15530_33_finngen_R outcome | 15530_33_Simple mc  | 7   | -0.2135  | 0.398435 | 0.611331 |
| 15530_33_finngen_R outcome | 15530_33_Weighted   | 7   | -0.19652 | 0.278006 | 0.506143 |
| 15533_97_finngen_R outcome | 15533_97_MR Egger   | 27  | -0.08524 | 0.164925 | 0.609819 |
| 15533_97_finngen_R outcome | 15533_97_Weighted   | 27  | -0.00982 | 0.13373  | 0.941468 |
| 15533_97_finngen_R outcome | 15533_97_Inverse va | 27  | -0.09359 | 0.089724 | 0.29692  |
| 15533_97_finngen_R outcome | 15533_97_Simple mc  | 27  | -0.10021 | 0.214153 | 0.643738 |
| 15533_97_finngen_R outcome | 15533_97_Weighted   | 27  | 0.013831 | 0.134204 | 0.918704 |
| 15535_3_Ffinngen_R outcome | 15535_3_FMR Egger   | 9   | -0.10764 | 0.230082 | 0.654115 |
| 15535_3_Ffinngen_R outcome | 15535_3_FWeighted   | 9   | -0.0443  | 0.160535 | 0.782599 |
| 15535_3_Ffinngen_R outcome | 15535_3_FInverse va | 9   | -0.05919 | 0.14022  | 0.672924 |
| 15535_3_Ffinngen_R outcome | 15535_3_FSimple mc  | 9   | -0.07631 | 0.279136 | 0.791491 |
| 15535_3_Ffinngen_R outcome | 15535_3_FWeighted   | 9   | -0.02174 | 0.171675 | 0.90236  |
| 15540_6_\finngen_R outcome | 15540_6_\MR Egger   | 5   | 0.098808 | 0.874301 | 0.917158 |
| 15540_6_\finngen_R outcome | 15540_6_\Weighted   | 5   | -0.0949  | 0.330314 | 0.773888 |
| 15540_6_\finngen_R outcome | 15540_6_\Inverse va | 5   | -0.20548 | 0.272151 | 0.450228 |
| 15540_6_\finngen_R outcome | 15540_6_\Simple mc  | 5   | -0.03151 | 0.468599 | 0.949619 |
| 15540_6_\finngen_R outcome | 15540_6_\Weighted   | 5   | 0.001549 | 0.401404 | 0.997106 |
| 15544_25_finngen_R outcome | 15544_25_MR Egger   | 43  | -0.0728  | 0.133793 | 0.589279 |
| 15544_25_finngen_R outcome | 15544_25_Weighted   | 43  | -0.09313 | 0.093946 | 0.321533 |
| 15544_25_finngen_R outcome | 15544_25_Inverse va | 43  | -0.04347 | 0.063884 | 0.496242 |
| 15544_25_finngen_R outcome | 15544_25_Simple mc  | 43  | -0.03321 | 0.160956 | 0.83755  |
| 15544_25_finngen_R outcome | 15544_25_Weighted   | 43  | -0.1188  | 0.108514 | 0.279846 |
| 15556_49_finngen_R outcome | 15556_49_MR Egger   | 52  | 0.023953 | 0.089852 | 0.790889 |
| 15556_49_finngen_R outcome | 15556_49_Weighted   | 52  | -0.00042 | 0.070396 | 0.995251 |
| 15556_49_finngen_R outcome | 15556_49_Inverse va | 52  | 0.044666 | 0.047057 | 0.342522 |
| 15556_49_finngen_R outcome | 15556_49_Simple mc  | 52  | 0.056028 | 0.101985 | 0.585145 |
| 15556_49_finngen_R outcome | 15556_49_Weighted   | 52  | 0.006097 | 0.070913 | 0.931823 |
| 15558_63_finngen_R outcome | 15558_63_MR Egger   | 88  | -0.08103 | 0.078389 | 0.304182 |
| 15558_63_finngen_R outcome | 15558_63_Weighted   | 88  | -0.08973 | 0.061495 | 0.144536 |
| 15558_63_finngen_R outcome | 15558_63_Inverse va | 88  | -0.00914 | 0.04657  | 0.84439  |
| 15558_63_finngen_R outcome | 15558_63_Simple mc  | 88  | 0.044286 | 0.116264 | 0.704196 |
| 15558_63_finngen_R outcome | 15558_63_Weighted   | 88  | -0.10539 | 0.062423 | 0.094928 |
| 15559_5_/finngen_R outcome | 15559_5_/MR Egger   | 16  | 0.105625 | 0.252678 | 0.682271 |
| 15559_5_/finngen_R outcome | 15559_5_/Weighted   | 16  | 0.01273  | 0.138547 | 0.926791 |
| 15559_5_/finngen_R outcome | 15559_5_/Inverse va | 16  | -0.02945 | 0.117646 | 0.802338 |
| 15559_5_/finngen_R outcome | 15559_5_/Simple mc  | 16  | -0.27903 | 0.212357 | 0.208601 |
| 15559_5_/finngen_R outcome | 15559_5_/Weighted   | 16  | 0.008866 | 0.133541 | 0.947946 |
| 15560_52_finngen_R outcome | 15560_52_MR Egger   | 108 | 0.011864 | 0.036932 | 0.748663 |
| 15560_52_finngen_R outcome | 15560_52_Weighted   | 108 | 0.020792 | 0.026623 | 0.434807 |
| 15560_52_finngen_R outcome | 15560_52_Inverse va | 108 | 0.027399 | 0.018201 | 0.132223 |
| 15560_52_finngen_R outcome | 15560_52_Simple mc  | 108 | -0.0041  | 0.047146 | 0.930797 |
| 15560_52_finngen_R outcome | 15560_52_Weighted   | 108 | 0.017769 | 0.032058 | 0.580558 |
| 15562_24_finngen_R outcome | 15562_24_MR Egger   | 9   | -0.43765 | 0.519045 | 0.426993 |
| 15562_24_finngen_R outcome | 15562_24_Weighted   | 9   | -0.52148 | 0.185222 | 0.004872 |
| 15562_24_finngen_R outcome | 15562_24_Inverse va | 9   | -0.46357 | 0.145012 | 0.00139  |
| 15562_24_finngen_R outcome | 15562_24_Simple mc  | 9   | -0.50376 | 0.238619 | 0.067752 |
| 15562_24_finngen_R outcome | 15562_24_Weighted   | 9   | -0.52967 | 0.204455 | 0.032082 |
| 15565_10;finngen_R outcome | 15565_10;MR Egger   | 5   | 0.781073 | 0.777628 | 0.389174 |
| 15565_10;finngen_R outcome | 15565_10;Weighted   | 5   | -0.34941 | 0.272975 | 0.20054  |
| 15565_10;finngen_R outcome | 15565_10;Inverse va | 5   | -0.48841 | 0.244301 | 0.045584 |
| 15565_10;finngen_R outcome | 15565_10;Simple mc  | 5   | -0.61955 | 0.60048  | 0.360485 |
| 15565_10;finngen_R outcome | 15565_10;Weighted   | 5   | -0.31843 | 0.26926  | 0.302452 |
| 15570_99_finngen_R outcome | 15570_99_MR Egger   | 34  | -0.22681 | 0.201584 | 0.268905 |
| 15570_99_finngen_R outcome | 15570_99_Weighted   | 34  | -0.09739 | 0.125349 | 0.437186 |
| 15570_99_finngen_R outcome | 15570_99_Inverse va | 34  | -0.00351 | 0.087074 | 0.967806 |



|                             |                      |     |          |          |          |
|-----------------------------|----------------------|-----|----------|----------|----------|
| 15570_99_finngen_R outcome  | 15570_99_Simple mc   | 34  | -0.14335 | 0.214574 | 0.508727 |
| 15570_99_finngen_R outcome  | 15570_99_Weighted    | 34  | -0.12239 | 0.146337 | 0.408983 |
| 15573_11(finngen_R outcome  | 15573_11(MR Egger    | 9   | -0.03061 | 0.235901 | 0.900421 |
| 15573_11(finngen_R outcome  | 15573_11(Weighted    | 9   | 0.081992 | 0.173879 | 0.63725  |
| 15573_11(finngen_R outcome  | 15573_11(Inverse va  | 9   | 0.072627 | 0.14536  | 0.617331 |
| 15573_11(finngen_R outcome  | 15573_11(Simple mc   | 9   | 0.120539 | 0.263574 | 0.659599 |
| 15573_11(finngen_R outcome  | 15573_11(Weighted    | 9   | 0.087533 | 0.186127 | 0.650706 |
| 15576_15(finngen_R outcome  | 15576_15(MR Egger    | 41  | -0.11673 | 0.120442 | 0.338437 |
| 15576_15(finngen_R outcome  | 15576_15(Weighted    | 41  | -0.14585 | 0.097091 | 0.13304  |
| 15576_15(finngen_R outcome  | 15576_15(Inverse va  | 41  | -0.14454 | 0.072318 | 0.045652 |
| 15576_15(finngen_R outcome  | 15576_15(Simple mc   | 41  | -0.09804 | 0.169845 | 0.567025 |
| 15576_15(finngen_R outcome  | 15576_15(Weighted    | 41  | -0.19735 | 0.09307  | 0.040221 |
| 15579_26_finngen_R outcome  | 15579_26_Inverse va  | 2   | -0.93614 | 0.453089 | 0.038816 |
| 15582_25_finngen_R outcome  | 15582_25_MR Egger    | 60  | 0.058316 | 0.113186 | 0.608352 |
| 15582_25_finngen_R outcome  | 15582_25_Weighted    | 60  | 0.032287 | 0.092189 | 0.726167 |
| 15582_25_finngen_R outcome  | 15582_25_Inverse va  | 60  | 0.019869 | 0.062741 | 0.751491 |
| 15582_25_finngen_R outcome  | 15582_25_Simple mc   | 60  | 0.331689 | 0.203258 | 0.108034 |
| 15582_25_finngen_R outcome  | 15582_25_Weighted    | 60  | 0.016362 | 0.086915 | 0.85132  |
| 15584_9_C(finngen_R outcome | 15584_9_C(MR Egger   | 87  | 0.062947 | 0.036182 | 0.085523 |
| 15584_9_C(finngen_R outcome | 15584_9_C(Weighted   | 87  | 0.024719 | 0.031839 | 0.437518 |
| 15584_9_C(finngen_R outcome | 15584_9_C(Inverse va | 87  | 0.013383 | 0.021639 | 0.536268 |
| 15584_9_C(finngen_R outcome | 15584_9_C(Simple mc  | 87  | 0.05543  | 0.048308 | 0.254381 |
| 15584_9_C(finngen_R outcome | 15584_9_C(Weighted   | 87  | 0.037925 | 0.030471 | 0.216648 |
| 15585_30(finngen_R outcome  | 15585_30(MR Egger    | 4   | 0.137369 | 1.161913 | 0.916692 |
| 15585_30(finngen_R outcome  | 15585_30(Weighted    | 4   | 0.563378 | 0.368935 | 0.126752 |
| 15585_30(finngen_R outcome  | 15585_30(Inverse va  | 4   | 0.459687 | 0.317196 | 0.147276 |
| 15585_30(finngen_R outcome  | 15585_30(Simple mc   | 4   | 0.560766 | 0.485647 | 0.331849 |
| 15585_30(finngen_R outcome  | 15585_30(Weighted    | 4   | 0.570509 | 0.443712 | 0.288784 |
| 15587_20_finngen_R outcome  | 15587_20_MR Egger    | 4   | -0.21303 | 0.487002 | 0.704498 |
| 15587_20_finngen_R outcome  | 15587_20_Weighted    | 4   | -0.05277 | 0.311346 | 0.86541  |
| 15587_20_finngen_R outcome  | 15587_20_Inverse va  | 4   | 0.075103 | 0.279405 | 0.788085 |
| 15587_20_finngen_R outcome  | 15587_20_Simple mc   | 4   | -0.0343  | 0.457264 | 0.944934 |
| 15587_20_finngen_R outcome  | 15587_20_Weighted    | 4   | -0.09224 | 0.351259 | 0.809868 |
| 15589_1_C(finngen_R outcome | 15589_1_C(MR Egger   | 8   | 0.308415 | 0.763976 | 0.700429 |
| 15589_1_C(finngen_R outcome | 15589_1_C(Weighted   | 8   | 0.174897 | 0.247259 | 0.479353 |
| 15589_1_C(finngen_R outcome | 15589_1_C(Inverse va | 8   | 0.21856  | 0.200365 | 0.275357 |
| 15589_1_C(finngen_R outcome | 15589_1_C(Simple mc  | 8   | 0.21347  | 0.324769 | 0.531999 |
| 15589_1_C(finngen_R outcome | 15589_1_C(Weighted   | 8   | 0.181905 | 0.24322  | 0.478886 |
| 15594_47_finngen_R outcome  | 15594_47_MR Egger    | 8   | -0.10514 | 0.593475 | 0.86521  |
| 15594_47_finngen_R outcome  | 15594_47_Weighted    | 8   | 0.176694 | 0.216031 | 0.413407 |
| 15594_47_finngen_R outcome  | 15594_47_Inverse va  | 8   | 0.195506 | 0.180775 | 0.27948  |
| 15594_47_finngen_R outcome  | 15594_47_Simple mc   | 8   | 0.151944 | 0.304797 | 0.633405 |
| 15594_47_finngen_R outcome  | 15594_47_Weighted    | 8   | 0.173707 | 0.286944 | 0.564038 |
| 15602_43_finngen_R outcome  | 15602_43_MR Egger    | 118 | -0.03295 | 0.040101 | 0.412886 |
| 15602_43_finngen_R outcome  | 15602_43_Weighted    | 118 | -0.02794 | 0.039411 | 0.478396 |
| 15602_43_finngen_R outcome  | 15602_43_Inverse va  | 118 | -0.00865 | 0.024164 | 0.720276 |
| 15602_43_finngen_R outcome  | 15602_43_Simple mc   | 118 | -0.07443 | 0.070334 | 0.292146 |
| 15602_43_finngen_R outcome  | 15602_43_Weighted    | 118 | -0.02717 | 0.03508  | 0.440119 |
| 15603_20_finngen_R outcome  | 15603_20_Inverse va  | 2   | -0.27556 | 0.350915 | 0.432301 |
| 15604_18_finngen_R outcome  | 15604_18_MR Egger    | 10  | 0.608906 | 0.329028 | 0.10138  |
| 15604_18_finngen_R outcome  | 15604_18_Weighted    | 10  | 0.539616 | 0.188041 | 0.004109 |
| 15604_18_finngen_R outcome  | 15604_18_Inverse va  | 10  | 0.553985 | 0.150652 | 0.000236 |
| 15604_18_finngen_R outcome  | 15604_18_Simple mc   | 10  | 0.463538 | 0.276615 | 0.128106 |
| 15604_18_finngen_R outcome  | 15604_18_Weighted    | 10  | 0.529887 | 0.218614 | 0.038368 |
| 15607_56_finngen_R outcome  | 15607_56_MR Egger    | 6   | -0.10855 | 0.350663 | 0.772357 |
| 15607_56_finngen_R outcome  | 15607_56_Weighted    | 6   | -0.03376 | 0.239197 | 0.887752 |
| 15607_56_finngen_R outcome  | 15607_56_Inverse va  | 6   | 0.011241 | 0.206129 | 0.956509 |
| 15607_56_finngen_R outcome  | 15607_56_Simple mc   | 6   | -0.09188 | 0.353998 | 0.805568 |

|                            |                     |     |          |          |          |
|----------------------------|---------------------|-----|----------|----------|----------|
| 15607_56_finngen_R outcome | 15607_56_Weighted   | 6   | -0.03162 | 0.261455 | 0.908459 |
| 15610_72_finngen_R outcome | 15610_72_MR Egger   | 8   | 0.494799 | 0.386617 | 0.247864 |
| 15610_72_finngen_R outcome | 15610_72_Weighted   | 8   | 0.074743 | 0.260697 | 0.77434  |
| 15610_72_finngen_R outcome | 15610_72_Inverse va | 8   | 0.062995 | 0.262153 | 0.810099 |
| 15610_72_finngen_R outcome | 15610_72_Simple mc  | 8   | 0.066434 | 0.333388 | 0.847716 |
| 15610_72_finngen_R outcome | 15610_72_Weighted   | 8   | 0.057754 | 0.269199 | 0.836242 |
| 15613_16_finngen_R outcome | 15613_16_MR Egger   | 5   | 0.905487 | 2.263923 | 0.715959 |
| 15613_16_finngen_R outcome | 15613_16_Weighted   | 5   | 0.555844 | 0.313905 | 0.076604 |
| 15613_16_finngen_R outcome | 15613_16_Inverse va | 5   | 0.649774 | 0.357552 | 0.069173 |
| 15613_16_finngen_R outcome | 15613_16_Simple mc  | 5   | 0.831404 | 0.516058 | 0.182456 |
| 15613_16_finngen_R outcome | 15613_16_Weighted   | 5   | 0.613681 | 0.346877 | 0.151587 |
| 15614_16{finngen_R outcome | 15614_16{MR Egger   | 70  | 0.082602 | 0.073774 | 0.266792 |
| 15614_16{finngen_R outcome | 15614_16{Weighted   | 70  | 0.035968 | 0.070895 | 0.611915 |
| 15614_16{finngen_R outcome | 15614_16{Inverse va | 70  | 0.040769 | 0.04736  | 0.389338 |
| 15614_16{finngen_R outcome | 15614_16{Simple mc  | 70  | 0.032927 | 0.119452 | 0.78364  |
| 15614_16{finngen_R outcome | 15614_16{Weighted   | 70  | 0.052977 | 0.064675 | 0.415537 |
| 15620_4_†finngen_R outcome | 15620_4_†MR Egger   | 8   | -0.75503 | 0.534707 | 0.20764  |
| 15620_4_†finngen_R outcome | 15620_4_†Weighted   | 8   | -0.39586 | 0.25366  | 0.118624 |
| 15620_4_†finngen_R outcome | 15620_4_†Inverse va | 8   | -0.27183 | 0.185909 | 0.143698 |
| 15620_4_†finngen_R outcome | 15620_4_†Simple mc  | 8   | -0.46316 | 0.40983  | 0.29565  |
| 15620_4_†finngen_R outcome | 15620_4_†Weighted   | 8   | -0.49123 | 0.257673 | 0.098274 |
| 15622_13_finngen_R outcome | 15622_13_MR Egger   | 14  | 0.36942  | 0.529035 | 0.498304 |
| 15622_13_finngen_R outcome | 15622_13_Weighted   | 14  | -0.17337 | 0.24144  | 0.47272  |
| 15622_13_finngen_R outcome | 15622_13_Inverse va | 14  | 0.112295 | 0.18684  | 0.547824 |
| 15622_13_finngen_R outcome | 15622_13_Simple mc  | 14  | -0.38591 | 0.426916 | 0.382468 |
| 15622_13_finngen_R outcome | 15622_13_Weighted   | 14  | -0.3667  | 0.392309 | 0.366966 |
| 15626_22{finngen_R outcome | 15626_22{MR Egger   | 26  | 0.159147 | 0.142126 | 0.273899 |
| 15626_22{finngen_R outcome | 15626_22{Weighted   | 26  | 0.063074 | 0.13725  | 0.645834 |
| 15626_22{finngen_R outcome | 15626_22{Inverse va | 26  | 0.121453 | 0.085306 | 0.154523 |
| 15626_22{finngen_R outcome | 15626_22{Simple mc  | 26  | 0.209905 | 0.257113 | 0.421987 |
| 15626_22{finngen_R outcome | 15626_22{Weighted   | 26  | 0.089706 | 0.148765 | 0.551937 |
| 15633_6_Ffinngen_R outcome | 15633_6_FInverse va | 2   | 0.332022 | 0.37221  | 0.372378 |
| 15635_4_§finngen_R outcome | 15635_4_§MR Egger   | 64  | 0.111865 | 0.103435 | 0.283663 |
| 15635_4_§finngen_R outcome | 15635_4_§Weighted   | 64  | 0.067629 | 0.088947 | 0.44706  |
| 15635_4_§finngen_R outcome | 15635_4_§Inverse va | 64  | 0.015671 | 0.054426 | 0.773402 |
| 15635_4_§finngen_R outcome | 15635_4_§Simple mc  | 64  | -0.13681 | 0.17921  | 0.448066 |
| 15635_4_§finngen_R outcome | 15635_4_§Weighted   | 64  | 0.019589 | 0.096565 | 0.8399   |
| 15644_1_Efinngen_R outcome | 15644_1_EMR Egger   | 71  | -0.05708 | 0.065183 | 0.384229 |
| 15644_1_Efinngen_R outcome | 15644_1_EWeighted   | 71  | -0.0405  | 0.060569 | 0.503701 |
| 15644_1_Efinngen_R outcome | 15644_1_EInverse va | 71  | -0.03253 | 0.044485 | 0.464663 |
| 15644_1_Efinngen_R outcome | 15644_1_ESimple mc  | 71  | -0.05595 | 0.147346 | 0.705325 |
| 15644_1_Efinngen_R outcome | 15644_1_EWeighted   | 71  | -0.04655 | 0.056159 | 0.409934 |
| 15653_9_Cfinngen_R outcome | 15653_9_CMR Egger   | 28  | -0.21789 | 0.174451 | 0.222792 |
| 15653_9_Cfinngen_R outcome | 15653_9_CWeighted   | 28  | -0.12019 | 0.128361 | 0.349096 |
| 15653_9_Cfinngen_R outcome | 15653_9_CInverse va | 28  | -0.12872 | 0.08879  | 0.147138 |
| 15653_9_Cfinngen_R outcome | 15653_9_CSimple mc  | 28  | -0.32834 | 0.220412 | 0.1479   |
| 15653_9_Cfinngen_R outcome | 15653_9_CWeighted   | 28  | -0.14716 | 0.132345 | 0.275965 |
| 15686_49_finngen_R outcome | 15686_49_MR Egger   | 113 | 0.039799 | 0.037731 | 0.293803 |
| 15686_49_finngen_R outcome | 15686_49_Weighted   | 113 | -0.01462 | 0.030691 | 0.633859 |
| 15686_49_finngen_R outcome | 15686_49_Inverse va | 113 | -0.00568 | 0.018946 | 0.764149 |
| 15686_49_finngen_R outcome | 15686_49_Simple mc  | 113 | -0.09335 | 0.056062 | 0.098685 |
| 15686_49_finngen_R outcome | 15686_49_Weighted   | 113 | -0.03604 | 0.03647  | 0.325124 |
| 16035_8_Ffinngen_R outcome | 16035_8_FMR Egger   | 10  | -0.64143 | 0.411717 | 0.15786  |
| 16035_8_Ffinngen_R outcome | 16035_8_FWeighted   | 10  | -0.39546 | 0.219463 | 0.071552 |
| 16035_8_Ffinngen_R outcome | 16035_8_FInverse va | 10  | -0.2802  | 0.174856 | 0.109052 |
| 16035_8_Ffinngen_R outcome | 16035_8_FSimple mc  | 10  | -0.34532 | 0.345182 | 0.343257 |
| 16035_8_Ffinngen_R outcome | 16035_8_FWeighted   | 10  | -0.40775 | 0.243279 | 0.128041 |
| 16049_43_finngen_R outcome | 16049_43_Wald ratio | 1   | 0.22488  | 0.750083 | 0.764324 |

|                             |                      |    |          |          |          |
|-----------------------------|----------------------|----|----------|----------|----------|
| 16055_3_C finngen_R outcome | 16055_3_C MR Egger   | 38 | 0.0558   | 0.061895 | 0.373303 |
| 16055_3_C finngen_R outcome | 16055_3_C Weighted   | 38 | 0.038362 | 0.058467 | 0.511742 |
| 16055_3_C finngen_R outcome | 16055_3_C Inverse va | 38 | -0.00353 | 0.042149 | 0.933246 |
| 16055_3_C finngen_R outcome | 16055_3_C Simple mc  | 38 | -0.07654 | 0.105265 | 0.471722 |
| 16055_3_C finngen_R outcome | 16055_3_C Weighted   | 38 | 0.016868 | 0.052823 | 0.751271 |
| 16057_6_I finngen_R outcome | 16057_6_I MR Egger   | 62 | -0.00258 | 0.076391 | 0.97314  |
| 16057_6_I finngen_R outcome | 16057_6_I Weighted   | 62 | -0.00184 | 0.069128 | 0.978801 |
| 16057_6_I finngen_R outcome | 16057_6_I Inverse va | 62 | 0.00859  | 0.047016 | 0.855023 |
| 16057_6_I finngen_R outcome | 16057_6_I Simple mc  | 62 | -0.08637 | 0.135212 | 0.525341 |
| 16057_6_I finngen_R outcome | 16057_6_I Weighted   | 62 | -0.0146  | 0.065145 | 0.823468 |
| 16060_99 finngen_R outcome  | 16060_99 MR Egger    | 94 | 0.068961 | 0.058139 | 0.238623 |
| 16060_99 finngen_R outcome  | 16060_99 Weighted    | 94 | 0.077956 | 0.049126 | 0.112548 |
| 16060_99 finngen_R outcome  | 16060_99 Inverse va  | 94 | 0.066692 | 0.033454 | 0.046204 |
| 16060_99 finngen_R outcome  | 16060_99 Simple mc   | 94 | 0.139319 | 0.088274 | 0.117901 |
| 16060_99 finngen_R outcome  | 16060_99 Weighted    | 94 | 0.078921 | 0.048315 | 0.105749 |
| 16070_7_V finngen_R outcome | 16070_7_V Inverse va | 2  | -0.75378 | 0.475174 | 0.112665 |
| 16079_2_T finngen_R outcome | 16079_2_T MR Egger   | 10 | -0.32748 | 0.526352 | 0.551147 |
| 16079_2_T finngen_R outcome | 16079_2_T Weighted   | 10 | 0.295878 | 0.205958 | 0.150833 |
| 16079_2_T finngen_R outcome | 16079_2_T Inverse va | 10 | 0.20003  | 0.16756  | 0.232564 |
| 16079_2_T finngen_R outcome | 16079_2_T Simple mc  | 10 | 0.416315 | 0.295331 | 0.192248 |
| 16079_2_T finngen_R outcome | 16079_2_T Weighted   | 10 | 0.354988 | 0.266397 | 0.21543  |
| 16288_17 finngen_R outcome  | 16288_17 MR Egger    | 22 | -0.1901  | 0.210528 | 0.377286 |
| 16288_17 finngen_R outcome  | 16288_17 Weighted    | 22 | 0.017914 | 0.155096 | 0.908048 |
| 16288_17 finngen_R outcome  | 16288_17 Inverse va  | 22 | -0.01725 | 0.10496  | 0.869452 |
| 16288_17 finngen_R outcome  | 16288_17 Simple mc   | 22 | 0.015149 | 0.251638 | 0.952564 |
| 16288_17 finngen_R outcome  | 16288_17 Weighted    | 22 | #####    | 0.22206  | 0.999697 |
| 16296_43 finngen_R outcome  | 16296_43 Inverse va  | 2  | 0.057188 | 0.485173 | 0.906169 |
| 16302_11 finngen_R outcome  | 16302_11 MR Egger    | 5  | 0.356769 | 0.865445 | 0.707853 |
| 16302_11 finngen_R outcome  | 16302_11 Weighted    | 5  | 0.44415  | 0.325637 | 0.172586 |
| 16302_11 finngen_R outcome  | 16302_11 Inverse va  | 5  | 0.358486 | 0.274519 | 0.191596 |
| 16302_11 finngen_R outcome  | 16302_11 Simple mc   | 5  | 0.489659 | 0.434682 | 0.32297  |
| 16302_11 finngen_R outcome  | 16302_11 Weighted    | 5  | 0.519876 | 0.365786 | 0.22829  |
| 16304_6_L finngen_R outcome | 16304_6_L Inverse va | 2  | 0.095045 | 0.423674 | 0.822496 |
| 16318_12 finngen_R outcome  | 16318_12 MR Egger    | 14 | -0.10044 | 0.236536 | 0.678608 |
| 16318_12 finngen_R outcome  | 16318_12 Weighted    | 14 | -0.03396 | 0.153639 | 0.825049 |
| 16318_12 finngen_R outcome  | 16318_12 Inverse va  | 14 | -0.02122 | 0.117099 | 0.856199 |
| 16318_12 finngen_R outcome  | 16318_12 Simple mc   | 14 | -0.12846 | 0.277461 | 0.651033 |
| 16318_12 finngen_R outcome  | 16318_12 Weighted    | 14 | -0.06959 | 0.160121 | 0.670976 |
| 16323_8_I finngen_R outcome | 16323_8_I MR Egger   | 21 | -0.16612 | 0.225502 | 0.470316 |
| 16323_8_I finngen_R outcome | 16323_8_I Weighted   | 21 | 0.102877 | 0.139521 | 0.460904 |
| 16323_8_I finngen_R outcome | 16323_8_I Inverse va | 21 | 0.183528 | 0.100878 | 0.068865 |
| 16323_8_I finngen_R outcome | 16323_8_I Simple mc  | 21 | 0.090503 | 0.221991 | 0.687833 |
| 16323_8_I finngen_R outcome | 16323_8_I Weighted   | 21 | 0.021879 | 0.166146 | 0.896551 |
| 16324_38 finngen_R outcome  | 16324_38 MR Egger    | 8  | 1.102188 | 0.595697 | 0.113751 |
| 16324_38 finngen_R outcome  | 16324_38 Weighted    | 8  | 0.814642 | 0.2768   | 0.00325  |
| 16324_38 finngen_R outcome  | 16324_38 Inverse va  | 8  | 0.782341 | 0.221857 | 0.000421 |
| 16324_38 finngen_R outcome  | 16324_38 Simple mc   | 8  | 0.876643 | 0.393072 | 0.06095  |
| 16324_38 finngen_R outcome  | 16324_38 Weighted    | 8  | 0.808595 | 0.302742 | 0.031958 |
| 16558_2_M finngen_R outcome | 16558_2_M MR Egger   | 47 | -0.00324 | 0.127993 | 0.979936 |
| 16558_2_M finngen_R outcome | 16558_2_M Weighted   | 47 | 0.073362 | 0.088145 | 0.405248 |
| 16558_2_M finngen_R outcome | 16558_2_M Inverse va | 47 | 0.05387  | 0.059493 | 0.365205 |
| 16558_2_M finngen_R outcome | 16558_2_M Simple mc  | 47 | -0.00783 | 0.156451 | 0.960287 |
| 16558_2_M finngen_R outcome | 16558_2_M Weighted   | 47 | 0.052801 | 0.100181 | 0.600689 |
| 16561_9_F finngen_R outcome | 16561_9_F MR Egger   | 19 | -0.09176 | 0.111967 | 0.423825 |
| 16561_9_F finngen_R outcome | 16561_9_F Weighted   | 19 | -0.10982 | 0.113258 | 0.332223 |
| 16561_9_F finngen_R outcome | 16561_9_F Inverse va | 19 | -0.13655 | 0.079182 | 0.084618 |
| 16561_9_F finngen_R outcome | 16561_9_F Simple mc  | 19 | -0.29618 | 0.171277 | 0.100874 |
| 16561_9_F finngen_R outcome | 16561_9_F Weighted   | 19 | -0.13533 | 0.111233 | 0.239452 |

|                              |                       |     |          |          |          |
|------------------------------|-----------------------|-----|----------|----------|----------|
| 16605_2_C finngen_R outcome  | 16605_2_C MR Egger    | 15  | 0.290354 | 0.234544 | 0.237626 |
| 16605_2_C finngen_R outcome  | 16605_2_C Weighted    | 15  | 0.324446 | 0.154245 | 0.035427 |
| 16605_2_C finngen_R outcome  | 16605_2_C Inverse va  | 15  | 0.310338 | 0.117982 | 0.008529 |
| 16605_2_C finngen_R outcome  | 16605_2_C Simple mc   | 15  | 0.200919 | 0.248583 | 0.432463 |
| 16605_2_C finngen_R outcome  | 16605_2_C Weighted    | 15  | 0.314308 | 0.169905 | 0.085546 |
| 16606_85_ finngen_R outcome  | 16606_85_ Inverse va  | 2   | -0.69586 | 0.358033 | 0.051948 |
| 16607_78_ finngen_R outcome  | 16607_78_ MR Egger    | 14  | -0.08222 | 0.156069 | 0.607916 |
| 16607_78_ finngen_R outcome  | 16607_78_ Weighted    | 14  | -0.11956 | 0.140091 | 0.393411 |
| 16607_78_ finngen_R outcome  | 16607_78_ Inverse va  | 14  | -0.0141  | 0.104592 | 0.892756 |
| 16607_78_ finngen_R outcome  | 16607_78_ Simple mc   | 14  | 0.026222 | 0.278888 | 0.926525 |
| 16607_78_ finngen_R outcome  | 16607_78_ Weighted    | 14  | -0.12564 | 0.147732 | 0.410456 |
| 16609_10_ finngen_R outcome  | 16609_10_ MR Egger    | 53  | 0.146983 | 0.065164 | 0.028414 |
| 16609_10_ finngen_R outcome  | 16609_10_ Weighted    | 53  | 0.127023 | 0.071474 | 0.075539 |
| 16609_10_ finngen_R outcome  | 16609_10_ Inverse va  | 53  | 0.082934 | 0.045879 | 0.070658 |
| 16609_10_ finngen_R outcome  | 16609_10_ Simple mc   | 53  | 0.06196  | 0.129592 | 0.63457  |
| 16609_10_ finngen_R outcome  | 16609_10_ Weighted    | 53  | 0.125984 | 0.064325 | 0.055537 |
| 16614_27_ finngen_R outcome  | 16614_27_ MR Egger    | 7   | -0.07442 | 0.221551 | 0.750578 |
| 16614_27_ finngen_R outcome  | 16614_27_ Weighted    | 7   | -0.01399 | 0.200009 | 0.944233 |
| 16614_27_ finngen_R outcome  | 16614_27_ Inverse va  | 7   | -0.08593 | 0.156243 | 0.582341 |
| 16614_27_ finngen_R outcome  | 16614_27_ Simple mc   | 7   | -0.13059 | 0.290196 | 0.668499 |
| 16614_27_ finngen_R outcome  | 16614_27_ Weighted    | 7   | 0.004605 | 0.20772  | 0.983031 |
| 16620_26_ finngen_R outcome  | 16620_26_ MR Egger    | 119 | -0.0217  | 0.041994 | 0.606314 |
| 16620_26_ finngen_R outcome  | 16620_26_ Weighted    | 119 | 0.018907 | 0.032694 | 0.563069 |
| 16620_26_ finngen_R outcome  | 16620_26_ Inverse va  | 119 | -0.00315 | 0.021813 | 0.885051 |
| 16620_26_ finngen_R outcome  | 16620_26_ Simple mc   | 119 | -0.00266 | 0.051214 | 0.95866  |
| 16620_26_ finngen_R outcome  | 16620_26_ Weighted    | 119 | 0.01424  | 0.029351 | 0.628468 |
| 16621_77_ finngen_R outcome  | 16621_77_ Inverse va  | 2   | -0.38221 | 0.195573 | 0.050665 |
| 16751_15_ finngen_R outcome  | 16751_15_ MR Egger    | 3   | 1.609598 | 1.149539 | 0.394818 |
| 16751_15_ finngen_R outcome  | 16751_15_ Weighted    | 3   | 0.295225 | 0.34505  | 0.392219 |
| 16751_15_ finngen_R outcome  | 16751_15_ Inverse va  | 3   | 0.154273 | 0.306384 | 0.614594 |
| 16751_15_ finngen_R outcome  | 16751_15_ Simple mc   | 3   | 0.39095  | 0.476608 | 0.498267 |
| 16751_15_ finngen_R outcome  | 16751_15_ Weighted    | 3   | 0.331708 | 0.391055 | 0.485632 |
| 16753_46_ finngen_R outcome  | 16753_46_ MR Egger    | 37  | 0.186664 | 0.133639 | 0.171274 |
| 16753_46_ finngen_R outcome  | 16753_46_ Weighted    | 37  | 0.124826 | 0.109234 | 0.253147 |
| 16753_46_ finngen_R outcome  | 16753_46_ Inverse va  | 37  | 0.093975 | 0.074214 | 0.205416 |
| 16753_46_ finngen_R outcome  | 16753_46_ Simple mc   | 37  | -0.07076 | 0.214327 | 0.743187 |
| 16753_46_ finngen_R outcome  | 16753_46_ Weighted    | 37  | 0.075408 | 0.133086 | 0.574493 |
| 16758_96_ finngen_R outcome  | 16758_96_ Wald ratio  | 1   | -0.88141 | 0.477662 | 0.065001 |
| 16763_11_ finngen_R outcome  | 16763_11_ MR Egger    | 102 | 0.002061 | 0.046969 | 0.96509  |
| 16763_11_ finngen_R outcome  | 16763_11_ Weighted    | 102 | -0.00985 | 0.048745 | 0.83993  |
| 16763_11_ finngen_R outcome  | 16763_11_ Inverse va  | 102 | 0.018624 | 0.029988 | 0.534568 |
| 16763_11_ finngen_R outcome  | 16763_11_ Simple mc   | 102 | 0.02011  | 0.112414 | 0.858384 |
| 16763_11_ finngen_R outcome  | 16763_11_ Weighted    | 102 | 0.02011  | 0.046166 | 0.664062 |
| 16770_3_ F finngen_R outcome | 16770_3_ F MR Egger   | 56  | 0.134648 | 0.096912 | 0.170421 |
| 16770_3_ F finngen_R outcome | 16770_3_ F Weighted   | 56  | 0.138706 | 0.087766 | 0.114016 |
| 16770_3_ F finngen_R outcome | 16770_3_ F Inverse va | 56  | 0.096039 | 0.0567   | 0.090304 |
| 16770_3_ F finngen_R outcome | 16770_3_ F Simple mc  | 56  | -0.01871 | 0.177847 | 0.916618 |
| 16770_3_ F finngen_R outcome | 16770_3_ F Weighted   | 56  | 0.18458  | 0.094112 | 0.054917 |
| 16773_29_ finngen_R outcome  | 16773_29_ MR Egger    | 18  | -0.26726 | 0.272569 | 0.341428 |
| 16773_29_ finngen_R outcome  | 16773_29_ Weighted    | 18  | -0.39188 | 0.158125 | 0.013201 |
| 16773_29_ finngen_R outcome  | 16773_29_ Inverse va  | 18  | -0.41743 | 0.14531  | 0.00407  |
| 16773_29_ finngen_R outcome  | 16773_29_ Simple mc   | 18  | -0.76694 | 0.333437 | 0.03438  |
| 16773_29_ finngen_R outcome  | 16773_29_ Weighted    | 18  | -0.4108  | 0.158032 | 0.018699 |
| 16781_2_ E finngen_R outcome | 16781_2_ E MR Egger   | 92  | 0.005657 | 0.053554 | 0.916113 |
| 16781_2_ E finngen_R outcome | 16781_2_ E Weighted   | 92  | -0.05231 | 0.049121 | 0.286938 |
| 16781_2_ E finngen_R outcome | 16781_2_ E Inverse va | 92  | -0.08573 | 0.035793 | 0.016609 |
| 16781_2_ E finngen_R outcome | 16781_2_ E Simple mc  | 92  | -0.21473 | 0.092443 | 0.022417 |
| 16781_2_ E finngen_R outcome | 16781_2_ E Weighted   | 92  | -0.03707 | 0.048388 | 0.445651 |

|                            |                            |     |          |          |          |
|----------------------------|----------------------------|-----|----------|----------|----------|
| 16785_45_finngen_R outcome | 16785_45_Inverse va        | 2   | 0.34315  | 0.29544  | 0.245443 |
| 16792_4_§finngen_R outcome | 16792_4_§MR Egger          | 195 | -0.04742 | 0.024282 | 0.052268 |
| 16792_4_§finngen_R outcome | 16792_4_§Weighted          | 195 | -0.04324 | 0.028235 | 0.12563  |
| 16792_4_§finngen_R outcome | 16792_4_§Inverse va        | 195 | -0.01623 | 0.016407 | 0.322587 |
| 16792_4_§finngen_R outcome | 16792_4_§Simple mc         | 195 | -0.00508 | 0.044498 | 0.909159 |
| 16792_4_§finngen_R outcome | 16792_4_§Weighted          | 195 | -0.03217 | 0.023242 | 0.167977 |
| 16805_5_Ffinngen_R outcome | 16805_5_FMR Egger          | 26  | -0.32502 | 0.253769 | 0.212511 |
| 16805_5_Ffinngen_R outcome | 16805_5_FWeighted          | 26  | -0.22279 | 0.147474 | 0.130862 |
| 16805_5_Ffinngen_R outcome | 16805_5_FInverse va        | 26  | -0.14682 | 0.10795  | 0.173812 |
| 16805_5_Ffinngen_R outcome | 16805_5_FSimple mc         | 26  | 0.02677  | 0.276971 | 0.923772 |
| 16805_5_Ffinngen_R outcome | 16805_5_FWeighted          | 26  | -0.20251 | 0.153459 | 0.198905 |
| 16818_20(finngen_R outcome | 16818_20(finngen_R outcome | 32  | -0.17953 | 0.165457 | 0.286536 |
| 16818_20(finngen_R outcome | 16818_20(finngen_R outcome | 32  | -0.04539 | 0.12589  | 0.718415 |
| 16818_20(finngen_R outcome | 16818_20(finngen_R outcome | 32  | -0.05461 | 0.078399 | 0.486054 |
| 16818_20(finngen_R outcome | 16818_20(finngen_R outcome | 32  | 0.033875 | 0.205499 | 0.87014  |
| 16818_20(finngen_R outcome | 16818_20(finngen_R outcome | 32  | -0.02793 | 0.128142 | 0.828907 |
| 16828_8_Cfinngen_R outcome | 16828_8_Cfinngen_R outcome | 151 | 0.015902 | 0.031789 | 0.617652 |
| 16828_8_Cfinngen_R outcome | 16828_8_Cfinngen_R outcome | 151 | 0.010624 | 0.028466 | 0.708978 |
| 16828_8_Cfinngen_R outcome | 16828_8_Cfinngen_R outcome | 151 | 0.005611 | 0.018267 | 0.758727 |
| 16828_8_Cfinngen_R outcome | 16828_8_Cfinngen_R outcome | 151 | 0.004581 | 0.049324 | 0.926127 |
| 16828_8_Cfinngen_R outcome | 16828_8_Cfinngen_R outcome | 151 | 0.004581 | 0.026201 | 0.861444 |
| 16836_1_Cfinngen_R outcome | 16836_1_Cfinngen_R outcome | 4   | 0.142421 | 0.745498 | 0.866129 |
| 16836_1_Cfinngen_R outcome | 16836_1_Cfinngen_R outcome | 4   | 0.15864  | 0.297289 | 0.593602 |
| 16836_1_Cfinngen_R outcome | 16836_1_Cfinngen_R outcome | 4   | 0.134656 | 0.268196 | 0.61561  |
| 16836_1_Cfinngen_R outcome | 16836_1_Cfinngen_R outcome | 4   | -0.27972 | 0.434115 | 0.565235 |
| 16836_1_Cfinngen_R outcome | 16836_1_Cfinngen_R outcome | 4   | 0.17251  | 0.324528 | 0.631867 |
| 16872_24(finngen_R outcome | 16872_24(finngen_R outcome | 178 | 0.025575 | 0.026313 | 0.332416 |
| 16872_24(finngen_R outcome | 16872_24(finngen_R outcome | 178 | -0.00927 | 0.023795 | 0.696854 |
| 16872_24(finngen_R outcome | 16872_24(finngen_R outcome | 178 | 0.003404 | 0.015787 | 0.82927  |
| 16872_24(finngen_R outcome | 16872_24(finngen_R outcome | 178 | 0.006581 | 0.039369 | 0.867429 |
| 16872_24(finngen_R outcome | 16872_24(finngen_R outcome | 178 | 0.006581 | 0.020704 | 0.750955 |
| 16890_37_finngen_R outcome | 16890_37_finngen_R outcome | 53  | -0.10847 | 0.106694 | 0.314121 |
| 16890_37_finngen_R outcome | 16890_37_finngen_R outcome | 53  | -0.06291 | 0.088323 | 0.476294 |
| 16890_37_finngen_R outcome | 16890_37_finngen_R outcome | 53  | -0.0353  | 0.057192 | 0.53713  |
| 16890_37_finngen_R outcome | 16890_37_finngen_R outcome | 53  | -0.12131 | 0.141533 | 0.395309 |
| 16890_37_finngen_R outcome | 16890_37_finngen_R outcome | 53  | -0.10967 | 0.103469 | 0.294067 |
| 16892_23_finngen_R outcome | 16892_23_finngen_R outcome | 20  | 0.227405 | 0.389412 | 0.566488 |
| 16892_23_finngen_R outcome | 16892_23_finngen_R outcome | 20  | 0.06341  | 0.163494 | 0.698134 |
| 16892_23_finngen_R outcome | 16892_23_finngen_R outcome | 20  | 0.095168 | 0.119863 | 0.42721  |
| 16892_23_finngen_R outcome | 16892_23_finngen_R outcome | 20  | 0.029259 | 0.257799 | 0.910827 |
| 16892_23_finngen_R outcome | 16892_23_finngen_R outcome | 20  | 0.005773 | 0.230965 | 0.980318 |
| 16908_5_Cfinngen_R outcome | 16908_5_Cfinngen_R outcome | 1   | -0.25524 | 0.937832 | 0.785501 |
| 16913_8_Ffinngen_R outcome | 16913_8_Ffinngen_R outcome | 54  | -0.32115 | 0.081896 | 0.000259 |
| 16913_8_Ffinngen_R outcome | 16913_8_Ffinngen_R outcome | 54  | -0.22554 | 0.074574 | 0.002492 |
| 16913_8_Ffinngen_R outcome | 16913_8_Ffinngen_R outcome | 54  | -0.22506 | 0.050975 | 1.01E-05 |
| 16913_8_Ffinngen_R outcome | 16913_8_Ffinngen_R outcome | 54  | -0.15065 | 0.124301 | 0.230912 |
| 16913_8_Ffinngen_R outcome | 16913_8_Ffinngen_R outcome | 54  | -0.23324 | 0.070146 | 0.00161  |
| 16914_10(finngen_R outcome | 16914_10(finngen_R outcome | 32  | -0.21561 | 0.198476 | 0.28599  |
| 16914_10(finngen_R outcome | 16914_10(finngen_R outcome | 32  | -0.33063 | 0.123318 | 0.007338 |
| 16914_10(finngen_R outcome | 16914_10(finngen_R outcome | 32  | -0.16904 | 0.089884 | 0.060015 |
| 16914_10(finngen_R outcome | 16914_10(finngen_R outcome | 32  | -0.57637 | 0.228595 | 0.017045 |
| 16914_10(finngen_R outcome | 16914_10(finngen_R outcome | 32  | -0.38886 | 0.132193 | 0.006129 |
| 16918_19(finngen_R outcome | 16918_19(finngen_R outcome | 161 | -0.02761 | 0.052943 | 0.602721 |
| 16918_19(finngen_R outcome | 16918_19(finngen_R outcome | 161 | -0.0383  | 0.048193 | 0.426806 |
| 16918_19(finngen_R outcome | 16918_19(finngen_R outcome | 161 | -0.0694  | 0.029286 | 0.017802 |
| 16918_19(finngen_R outcome | 16918_19(finngen_R outcome | 161 | -0.03061 | 0.092972 | 0.742412 |
| 16918_19(finngen_R outcome | 16918_19(finngen_R outcome | 161 | -0.03061 | 0.04992  | 0.540639 |
| 17138_8_Cfinngen_R outcome | 17138_8_Cfinngen_R outcome | 39  | 0.101616 | 0.110052 | 0.361807 |

|                               |                        |     |          |          |          |
|-------------------------------|------------------------|-----|----------|----------|----------|
| 17138_8_C finngen_R outcome   | 17138_8_C Weighted     | 39  | 0.051218 | 0.091256 | 0.574619 |
| 17138_8_C finngen_R outcome   | 17138_8_C Inverse va   | 39  | -0.0161  | 0.065122 | 0.804676 |
| 17138_8_C finngen_R outcome   | 17138_8_C Simple mc    | 39  | -0.00558 | 0.159706 | 0.972316 |
| 17138_8_C finngen_R outcome   | 17138_8_C Weighted     | 39  | 0.00835  | 0.083252 | 0.920638 |
| 17140_57_ finngen_R outcome   | 17140_57_ MR Egger     | 57  | -0.15916 | 0.109189 | 0.150619 |
| 17140_57_ finngen_R outcome   | 17140_57_ Weighted     | 57  | -0.03657 | 0.086517 | 0.672484 |
| 17140_57_ finngen_R outcome   | 17140_57_ Inverse va   | 57  | 0.008567 | 0.053131 | 0.871897 |
| 17140_57_ finngen_R outcome   | 17140_57_ Simple mc    | 57  | -0.12861 | 0.136015 | 0.348422 |
| 17140_57_ finngen_R outcome   | 17140_57_ Weighted     | 57  | -0.08682 | 0.074649 | 0.249724 |
| 17153_46_ finngen_R outcome   | 17153_46_ MR Egger     | 117 | -0.09475 | 0.062363 | 0.131424 |
| 17153_46_ finngen_R outcome   | 17153_46_ Weighted     | 117 | -0.05015 | 0.055588 | 0.366694 |
| 17153_46_ finngen_R outcome   | 17153_46_ Inverse va   | 117 | -0.00466 | 0.037235 | 0.90048  |
| 17153_46_ finngen_R outcome   | 17153_46_ Simple mc    | 117 | -0.04849 | 0.104114 | 0.642305 |
| 17153_46_ finngen_R outcome   | 17153_46_ Weighted     | 117 | -0.1318  | 0.061908 | 0.035379 |
| 17156_72_ finngen_R outcome   | 17156_72_ MR Egger     | 9   | 0.225875 | 0.301739 | 0.478504 |
| 17156_72_ finngen_R outcome   | 17156_72_ Weighted     | 9   | 0.036812 | 0.167349 | 0.825893 |
| 17156_72_ finngen_R outcome   | 17156_72_ Inverse va   | 9   | -0.02956 | 0.134451 | 0.825984 |
| 17156_72_ finngen_R outcome   | 17156_72_ Simple mc    | 9   | 0.066295 | 0.23512  | 0.78513  |
| 17156_72_ finngen_R outcome   | 17156_72_ Weighted     | 9   | 0.038779 | 0.17573  | 0.830873 |
| 17161_1_[] finngen_R outcome  | 17161_1_[] MR Egger    | 3   | -0.91549 | 1.190393 | 0.582637 |
| 17161_1_[] finngen_R outcome  | 17161_1_[] Weighted    | 3   | 0.253123 | 0.404789 | 0.531761 |
| 17161_1_[] finngen_R outcome  | 17161_1_[] Inverse va  | 3   | 0.355379 | 0.355401 | 0.317341 |
| 17161_1_[] finngen_R outcome  | 17161_1_[] Simple mc   | 3   | -0.05912 | 0.60825  | 0.931437 |
| 17161_1_[] finngen_R outcome  | 17161_1_[] Weighted    | 3   | -0.04442 | 0.585092 | 0.946393 |
| 17170_15_ finngen_R outcome   | 17170_15_ MR Egger     | 18  | 0.115131 | 0.254919 | 0.657591 |
| 17170_15_ finngen_R outcome   | 17170_15_ Weighted     | 18  | -0.11846 | 0.158048 | 0.453534 |
| 17170_15_ finngen_R outcome   | 17170_15_ Inverse va   | 18  | -0.00354 | 0.13308  | 0.978793 |
| 17170_15_ finngen_R outcome   | 17170_15_ Simple mc    | 18  | -0.2736  | 0.266331 | 0.318682 |
| 17170_15_ finngen_R outcome   | 17170_15_ Weighted     | 18  | -0.17306 | 0.158673 | 0.290636 |
| 17224_12_ finngen_R outcome   | 17224_12_ MR Egger     | 63  | -0.03574 | 0.106774 | 0.738979 |
| 17224_12_ finngen_R outcome   | 17224_12_ Weighted     | 63  | -0.0489  | 0.079117 | 0.536512 |
| 17224_12_ finngen_R outcome   | 17224_12_ Inverse va   | 63  | -0.11353 | 0.051798 | 0.028395 |
| 17224_12_ finngen_R outcome   | 17224_12_ Simple mc    | 63  | -0.2857  | 0.159738 | 0.078573 |
| 17224_12_ finngen_R outcome   | 17224_12_ Weighted     | 63  | -0.09761 | 0.082815 | 0.243039 |
| 17377_1_ / finngen_R outcome  | 17377_1_ / MR Egger    | 31  | -0.06572 | 0.21806  | 0.765275 |
| 17377_1_ / finngen_R outcome  | 17377_1_ / Weighted    | 31  | 0.012682 | 0.149974 | 0.932609 |
| 17377_1_ / finngen_R outcome  | 17377_1_ / Inverse va  | 31  | 0.085395 | 0.10694  | 0.424565 |
| 17377_1_ / finngen_R outcome  | 17377_1_ / Simple mc   | 31  | 0.02502  | 0.277603 | 0.928784 |
| 17377_1_ / finngen_R outcome  | 17377_1_ / Weighted    | 31  | 0.006386 | 0.235288 | 0.978525 |
| 17396_23_ finngen_R outcome   | 17396_23_ MR Egger     | 4   | -0.95722 | 0.537821 | 0.217066 |
| 17396_23_ finngen_R outcome   | 17396_23_ Weighted     | 4   | -1.21691 | 0.39386  | 0.002004 |
| 17396_23_ finngen_R outcome   | 17396_23_ Inverse va   | 4   | -1.15377 | 0.320784 | 0.000322 |
| 17396_23_ finngen_R outcome   | 17396_23_ Simple mc    | 4   | -1.43486 | 0.522731 | 0.071043 |
| 17396_23_ finngen_R outcome   | 17396_23_ Weighted     | 4   | -0.82643 | 0.460959 | 0.1709   |
| 17398_55_ finngen_R outcome   | 17398_55_ MR Egger     | 9   | -0.87251 | 0.402227 | 0.066697 |
| 17398_55_ finngen_R outcome   | 17398_55_ Weighted     | 9   | -0.23149 | 0.298172 | 0.437537 |
| 17398_55_ finngen_R outcome   | 17398_55_ Inverse va   | 9   | -0.12891 | 0.218173 | 0.554615 |
| 17398_55_ finngen_R outcome   | 17398_55_ Simple mc    | 9   | -0.28317 | 0.421463 | 0.520593 |
| 17398_55_ finngen_R outcome   | 17398_55_ Weighted     | 9   | -0.35752 | 0.371878 | 0.364511 |
| 17447_52_ finngen_R outcome   | 17447_52_ MR Egger     | 8   | -0.01409 | 0.234046 | 0.953942 |
| 17447_52_ finngen_R outcome   | 17447_52_ Weighted     | 8   | 0.079804 | 0.147957 | 0.58963  |
| 17447_52_ finngen_R outcome   | 17447_52_ Inverse va   | 8   | 0.015585 | 0.130308 | 0.904797 |
| 17447_52_ finngen_R outcome   | 17447_52_ Simple mc    | 8   | 0.152481 | 0.205419 | 0.48207  |
| 17447_52_ finngen_R outcome   | 17447_52_ Weighted     | 8   | 0.071582 | 0.161817 | 0.671572 |
| 17453_34_ finngen_R outcome   | 17453_34_ Wald ratio   | 1   | -1.12124 | 0.819902 | 0.17146  |
| 17672_18_ / finngen_R outcome | 17672_18_ / MR Egger   | 10  | 0.135558 | 0.188152 | 0.491748 |
| 17672_18_ / finngen_R outcome | 17672_18_ / Weighted   | 10  | 0.102277 | 0.169986 | 0.547388 |
| 17672_18_ / finngen_R outcome | 17672_18_ / Inverse va | 10  | 0.24638  | 0.139636 | 0.077657 |

|            |                   |            |            |    |          |          |          |
|------------|-------------------|------------|------------|----|----------|----------|----------|
| 17672_18_4 | finngen_R outcome | 17672_18_4 | Simple mc  | 10 | 0.406501 | 0.347    | 0.271487 |
| 17672_18_4 | finngen_R outcome | 17672_18_4 | Weighted   | 10 | 0.082857 | 0.188421 | 0.670492 |
| 17677_47_  | finngen_R outcome | 17677_47_  | MR Egger   | 4  | 1.238555 | 2.259234 | 0.638558 |
| 17677_47_  | finngen_R outcome | 17677_47_  | Weighted   | 4  | -0.09819 | 0.250541 | 0.695135 |
| 17677_47_  | finngen_R outcome | 17677_47_  | Inverse va | 4  | -0.17974 | 0.301806 | 0.55147  |
| 17677_47_  | finngen_R outcome | 17677_47_  | Simple mc  | 4  | -0.03678 | 0.433806 | 0.937773 |
| 17677_47_  | finngen_R outcome | 17677_47_  | Weighted   | 4  | -0.04876 | 0.2657   | 0.866105 |
| 17680_12_  | finngen_R outcome | 17680_12_  | MR Egger   | 39 | -0.14378 | 0.141704 | 0.316863 |
| 17680_12_  | finngen_R outcome | 17680_12_  | Weighted   | 39 | -0.15342 | 0.095313 | 0.107474 |
| 17680_12_  | finngen_R outcome | 17680_12_  | Inverse va | 39 | -0.02501 | 0.065641 | 0.703192 |
| 17680_12_  | finngen_R outcome | 17680_12_  | Simple mc  | 39 | -0.12804 | 0.187907 | 0.499757 |
| 17680_12_  | finngen_R outcome | 17680_12_  | Weighted   | 39 | -0.13529 | 0.101849 | 0.191989 |
| 17682_1_() | finngen_R outcome | 17682_1_() | MR Egger   | 16 | -0.2631  | 0.249117 | 0.308797 |
| 17682_1_() | finngen_R outcome | 17682_1_() | Weighted   | 16 | 0.020213 | 0.126408 | 0.872958 |
| 17682_1_() | finngen_R outcome | 17682_1_() | Inverse va | 16 | 0.002377 | 0.088187 | 0.978492 |
| 17682_1_() | finngen_R outcome | 17682_1_() | Simple mc  | 16 | 0.17398  | 0.187418 | 0.367951 |
| 17682_1_() | finngen_R outcome | 17682_1_() | Weighted   | 16 | 0.024824 | 0.130415 | 0.851593 |
| 17685_9_#  | finngen_R outcome | 17685_9_#  | MR Egger   | 6  | 0.688823 | 0.418812 | 0.175376 |
| 17685_9_#  | finngen_R outcome | 17685_9_#  | Weighted   | 6  | 0.44048  | 0.301122 | 0.143523 |
| 17685_9_#  | finngen_R outcome | 17685_9_#  | Inverse va | 6  | 0.20436  | 0.23351  | 0.381482 |
| 17685_9_#  | finngen_R outcome | 17685_9_#  | Simple mc  | 6  | 0.356015 | 0.432436 | 0.447823 |
| 17685_9_#  | finngen_R outcome | 17685_9_#  | Weighted   | 6  | 0.451652 | 0.346729 | 0.249475 |
| 17691_1_() | finngen_R outcome | 17691_1_() | MR Egger   | 12 | -0.13293 | 0.302386 | 0.669577 |
| 17691_1_() | finngen_R outcome | 17691_1_() | Weighted   | 12 | 0.199544 | 0.202264 | 0.323864 |
| 17691_1_() | finngen_R outcome | 17691_1_() | Inverse va | 12 | 0.070744 | 0.15461  | 0.647265 |
| 17691_1_() | finngen_R outcome | 17691_1_() | Simple mc  | 12 | 0.311628 | 0.329703 | 0.364868 |
| 17691_1_() | finngen_R outcome | 17691_1_() | Weighted   | 12 | 0.145895 | 0.249602 | 0.570671 |
| 17692_2_#  | finngen_R outcome | 17692_2_#  | MR Egger   | 24 | -0.25842 | 0.107045 | 0.024539 |
| 17692_2_#  | finngen_R outcome | 17692_2_#  | Weighted   | 24 | -0.27816 | 0.074303 | 0.000181 |
| 17692_2_#  | finngen_R outcome | 17692_2_#  | Inverse va | 24 | -0.19912 | 0.063372 | 0.001678 |
| 17692_2_#  | finngen_R outcome | 17692_2_#  | Simple mc  | 24 | -0.03271 | 0.161764 | 0.841544 |
| 17692_2_#  | finngen_R outcome | 17692_2_#  | Weighted   | 24 | -0.27292 | 0.073658 | 0.001166 |
| 17702_53_  | finngen_R outcome | 17702_53_  | MR Egger   | 17 | -0.46616 | 0.270959 | 0.105917 |
| 17702_53_  | finngen_R outcome | 17702_53_  | Weighted   | 17 | -0.21233 | 0.145875 | 0.145515 |
| 17702_53_  | finngen_R outcome | 17702_53_  | Inverse va | 17 | -0.14919 | 0.117008 | 0.202289 |
| 17702_53_  | finngen_R outcome | 17702_53_  | Simple mc  | 17 | -0.12742 | 0.298962 | 0.675627 |
| 17702_53_  | finngen_R outcome | 17702_53_  | Weighted   | 17 | -0.22528 | 0.149559 | 0.151474 |
| 17722_5_#  | finngen_R outcome | 17722_5_#  | Inverse va | 2  | -0.09416 | 1.029114 | 0.927099 |
| 17786_5_() | finngen_R outcome | 17786_5_() | Inverse va | 2  | -0.6545  | 0.365344 | 0.073219 |
| 17813_21_  | finngen_R outcome | 17813_21_  | MR Egger   | 3  | 0.7631   | 0.727646 | 0.484862 |
| 17813_21_  | finngen_R outcome | 17813_21_  | Weighted   | 3  | -0.00466 | 0.260848 | 0.985755 |
| 17813_21_  | finngen_R outcome | 17813_21_  | Inverse va | 3  | -0.0027  | 0.250159 | 0.991378 |
| 17813_21_  | finngen_R outcome | 17813_21_  | Simple mc  | 3  | 0.256838 | 0.363322 | 0.552883 |
| 17813_21_  | finngen_R outcome | 17813_21_  | Weighted   | 3  | 0.055758 | 0.283279 | 0.862149 |
| 17814_8_#  | finngen_R outcome | 17814_8_#  | Wald ratio | 1  | 0.024753 | 0.614586 | 0.967874 |
| 18162_16_# | finngen_R outcome | 18162_16_# | Wald ratio | 1  | -0.21141 | 0.544678 | 0.697917 |
| 18206_18_  | finngen_R outcome | 18206_18_  | MR Egger   | 15 | -0.04365 | 0.255893 | 0.867179 |
| 18206_18_  | finngen_R outcome | 18206_18_  | Weighted   | 15 | -0.1376  | 0.177473 | 0.438146 |
| 18206_18_  | finngen_R outcome | 18206_18_  | Inverse va | 15 | -0.05337 | 0.129033 | 0.67916  |
| 18206_18_  | finngen_R outcome | 18206_18_  | Simple mc  | 15 | -0.16073 | 0.305021 | 0.606478 |
| 18206_18_  | finngen_R outcome | 18206_18_  | Weighted   | 15 | -0.18026 | 0.213088 | 0.411813 |
| 18216_22_  | finngen_R outcome | 18216_22_  | MR Egger   | 22 | 0.117841 | 0.093543 | 0.222261 |
| 18216_22_  | finngen_R outcome | 18216_22_  | Weighted   | 22 | 0.056644 | 0.08567  | 0.508495 |
| 18216_22_  | finngen_R outcome | 18216_22_  | Inverse va | 22 | 0.007624 | 0.064488 | 0.905888 |
| 18216_22_  | finngen_R outcome | 18216_22_  | Simple mc  | 22 | -0.0073  | 0.125678 | 0.954212 |
| 18216_22_  | finngen_R outcome | 18216_22_  | Weighted   | 22 | 0.069135 | 0.085454 | 0.427567 |
| 18225_13_  | finngen_R outcome | 18225_13_  | MR Egger   | 59 | -0.017   | 0.056575 | 0.764924 |
| 18225_13_  | finngen_R outcome | 18225_13_  | Weighted   | 59 | -0.03888 | 0.057322 | 0.497612 |

|                             |                      |     |          |          |          |
|-----------------------------|----------------------|-----|----------|----------|----------|
| 18225_13_finngen_R outcome  | 18225_13_Inverse va  | 59  | 0.006354 | 0.039932 | 0.873567 |
| 18225_13_finngen_R outcome  | 18225_13_Simple mc   | 59  | 0.162209 | 0.116805 | 0.170229 |
| 18225_13_finngen_R outcome  | 18225_13_Weighted    | 59  | -0.04687 | 0.050335 | 0.355583 |
| 18340_2_Ffinngen_R outcome  | 18340_2_FMR Egger    | 38  | -0.10229 | 0.072306 | 0.16577  |
| 18340_2_Ffinngen_R outcome  | 18340_2_FWeighted    | 38  | -0.11587 | 0.06466  | 0.073147 |
| 18340_2_Ffinngen_R outcome  | 18340_2_FInverse va  | 38  | -0.16711 | 0.050654 | 0.00097  |
| 18340_2_Ffinngen_R outcome  | 18340_2_FSimple mc   | 38  | -0.10239 | 0.148043 | 0.493472 |
| 18340_2_Ffinngen_R outcome  | 18340_2_FWeighted    | 38  | -0.12209 | 0.062183 | 0.057142 |
| 18381_16_finngen_R outcome  | 18381_16_MR Egger    | 6   | -0.23827 | 0.753688 | 0.767709 |
| 18381_16_finngen_R outcome  | 18381_16_Weighted    | 6   | -0.26555 | 0.311938 | 0.3946   |
| 18381_16_finngen_R outcome  | 18381_16_Inverse va  | 6   | -0.21388 | 0.299965 | 0.475835 |
| 18381_16_finngen_R outcome  | 18381_16_Simple mc   | 6   | -0.52179 | 0.512721 | 0.355519 |
| 18381_16_finngen_R outcome  | 18381_16_Weighted    | 6   | -0.38894 | 0.439527 | 0.416724 |
| 18382_10f_finngen_R outcome | 18382_10f_Wald ratio | 1   | 0.575033 | 0.420103 | 0.171065 |
| 18422_41_finngen_R outcome  | 18422_41_Inverse va  | 2   | 1.100354 | 0.634239 | 0.082755 |
| 18819_21_finngen_R outcome  | 18819_21_MR Egger    | 80  | -0.03694 | 0.082699 | 0.65631  |
| 18819_21_finngen_R outcome  | 18819_21_Weighted    | 80  | 0.017039 | 0.066729 | 0.798451 |
| 18819_21_finngen_R outcome  | 18819_21_Inverse va  | 80  | 0.034384 | 0.040382 | 0.394512 |
| 18819_21_finngen_R outcome  | 18819_21_Simple mc   | 80  | 0.08103  | 0.119889 | 0.501096 |
| 18819_21_finngen_R outcome  | 18819_21_Weighted    | 80  | 0.054718 | 0.071073 | 0.443669 |
| 18830_1_l_finngen_R outcome | 18830_1_l_MR Egger   | 9   | -0.11922 | 0.410349 | 0.779823 |
| 18830_1_l_finngen_R outcome | 18830_1_l_Weighted   | 9   | -0.19775 | 0.276437 | 0.474397 |
| 18830_1_l_finngen_R outcome | 18830_1_l_Inverse va | 9   | -0.06702 | 0.218311 | 0.758859 |
| 18830_1_l_finngen_R outcome | 18830_1_l_Simple mc  | 9   | -0.11155 | 0.39936  | 0.787082 |
| 18830_1_l_finngen_R outcome | 18830_1_l_Weighted   | 9   | -0.16106 | 0.336314 | 0.644825 |
| 18832_65_finngen_R outcome  | 18832_65_MR Egger    | 45  | -0.04195 | 0.103373 | 0.686908 |
| 18832_65_finngen_R outcome  | 18832_65_Weighted    | 45  | -0.1239  | 0.0799   | 0.120972 |
| 18832_65_finngen_R outcome  | 18832_65_Inverse va  | 45  | 0.011137 | 0.068069 | 0.87003  |
| 18832_65_finngen_R outcome  | 18832_65_Simple mc   | 45  | -0.08105 | 0.164958 | 0.62562  |
| 18832_65_finngen_R outcome  | 18832_65_Weighted    | 45  | -0.06986 | 0.070645 | 0.32816  |
| 18839_24_finngen_R outcome  | 18839_24_Wald ratio  | 1   | 0.156334 | 0.711258 | 0.826027 |
| 18841_1_s_finngen_R outcome | 18841_1_s_MR Egger   | 15  | 0.315996 | 0.275594 | 0.272213 |
| 18841_1_s_finngen_R outcome | 18841_1_s_Weighted   | 15  | 0.202899 | 0.180513 | 0.261008 |
| 18841_1_s_finngen_R outcome | 18841_1_s_Inverse va | 15  | 0.118497 | 0.138543 | 0.392382 |
| 18841_1_s_finngen_R outcome | 18841_1_s_Simple mc  | 15  | 0.129907 | 0.268368 | 0.635825 |
| 18841_1_s_finngen_R outcome | 18841_1_s_Weighted   | 15  | 0.177095 | 0.216673 | 0.427427 |
| 18864_7_Ffinngen_R outcome  | 18864_7_FMR Egger    | 52  | 0.052111 | 0.08882  | 0.560041 |
| 18864_7_Ffinngen_R outcome  | 18864_7_FWeighted    | 52  | 0.059929 | 0.059621 | 0.314813 |
| 18864_7_Ffinngen_R outcome  | 18864_7_FInverse va  | 52  | 0.068864 | 0.048669 | 0.157081 |
| 18864_7_Ffinngen_R outcome  | 18864_7_FSimple mc   | 52  | 0.043224 | 0.102421 | 0.67478  |
| 18864_7_Ffinngen_R outcome  | 18864_7_FWeighted    | 52  | 0.043224 | 0.055866 | 0.442675 |
| 18873_8_Cfinngen_R outcome  | 18873_8_CMR Egger    | 4   | -1.37479 | 1.162806 | 0.358603 |
| 18873_8_Cfinngen_R outcome  | 18873_8_CWeighted    | 4   | -0.63516 | 0.372222 | 0.087936 |
| 18873_8_Cfinngen_R outcome  | 18873_8_CInverse va  | 4   | -0.57377 | 0.316234 | 0.069618 |
| 18873_8_Cfinngen_R outcome  | 18873_8_CSimple mc   | 4   | -0.67333 | 0.479288 | 0.254705 |
| 18873_8_Cfinngen_R outcome  | 18873_8_CWeighted    | 4   | -0.66353 | 0.44453  | 0.232353 |
| 18875_12f_finngen_R outcome | 18875_12f_MR Egger   | 107 | -0.08684 | 0.051002 | 0.091595 |
| 18875_12f_finngen_R outcome | 18875_12f_Weighted   | 107 | -0.06945 | 0.050787 | 0.171455 |
| 18875_12f_finngen_R outcome | 18875_12f_Inverse va | 107 | -0.03868 | 0.031532 | 0.219928 |
| 18875_12f_finngen_R outcome | 18875_12f_Simple mc  | 107 | -0.01039 | 0.095187 | 0.913261 |
| 18875_12f_finngen_R outcome | 18875_12f_Weighted   | 107 | -0.0624  | 0.04572  | 0.175176 |
| 18876_77_finngen_R outcome  | 18876_77_Inverse va  | 2   | 0.237487 | 0.370713 | 0.521768 |
| 18878_15_finngen_R outcome  | 18878_15_MR Egger    | 78  | 0.039484 | 0.059084 | 0.505988 |
| 18878_15_finngen_R outcome  | 18878_15_Weighted    | 78  | -0.06382 | 0.055682 | 0.251734 |
| 18878_15_finngen_R outcome  | 18878_15_Inverse va  | 78  | -0.03186 | 0.035663 | 0.37162  |
| 18878_15_finngen_R outcome  | 18878_15_Simple mc   | 78  | -0.11211 | 0.106232 | 0.294578 |
| 18878_15_finngen_R outcome  | 18878_15_Weighted    | 78  | -0.02032 | 0.054006 | 0.707766 |
| 18880_81_finngen_R outcome  | 18880_81_MR Egger    | 3   | 2.270944 | 2.062842 | 0.469454 |



|                             |                      |     |          |          |          |
|-----------------------------|----------------------|-----|----------|----------|----------|
| 18880_81_finngen_R outcome  | 18880_81_Weighted    | 3   | -0.36175 | 0.483312 | 0.454164 |
| 18880_81_finngen_R outcome  | 18880_81_Inverse va  | 3   | -0.39439 | 0.42625  | 0.354827 |
| 18880_81_finngen_R outcome  | 18880_81_Simple mc   | 3   | -0.03299 | 0.60897  | 0.961718 |
| 18880_81_finngen_R outcome  | 18880_81_Weighted    | 3   | -0.26832 | 0.534945 | 0.665728 |
| 18881_7_Cfinngen_R outcome  | 18881_7_CMR Egger    | 11  | 0.264955 | 0.242718 | 0.303361 |
| 18881_7_Cfinngen_R outcome  | 18881_7_CWeighted    | 11  | 0.051967 | 0.199459 | 0.794447 |
| 18881_7_Cfinngen_R outcome  | 18881_7_CInverse va  | 11  | 0.13856  | 0.146894 | 0.345544 |
| 18881_7_Cfinngen_R outcome  | 18881_7_CSimple mc   | 11  | -0.17729 | 0.316296 | 0.587455 |
| 18881_7_Cfinngen_R outcome  | 18881_7_CWeighted    | 11  | -0.06615 | 0.268047 | 0.810056 |
| 18893_26_finngen_R outcome  | 18893_26_Wald ratio  | 1   | 0.623702 | 0.575099 | 0.278138 |
| 18895_54_finngen_R outcome  | 18895_54_MR Egger    | 128 | -0.00454 | 0.039481 | 0.908642 |
| 18895_54_finngen_R outcome  | 18895_54_Weighted    | 128 | -0.01107 | 0.04129  | 0.788577 |
| 18895_54_finngen_R outcome  | 18895_54_Inverse va  | 128 | 0.007773 | 0.026437 | 0.768738 |
| 18895_54_finngen_R outcome  | 18895_54_Simple mc   | 128 | -0.00184 | 0.078107 | 0.981203 |
| 18895_54_finngen_R outcome  | 18895_54_Weighted    | 128 | -0.00184 | 0.037761 | 0.961131 |
| 18917_53_finngen_R outcome  | 18917_53_MR Egger    | 50  | 0.052925 | 0.078238 | 0.501993 |
| 18917_53_finngen_R outcome  | 18917_53_Weighted    | 50  | 0.103601 | 0.073758 | 0.160137 |
| 18917_53_finngen_R outcome  | 18917_53_Inverse va  | 50  | 0.071966 | 0.049843 | 0.148779 |
| 18917_53_finngen_R outcome  | 18917_53_Simple mc   | 50  | 0.078246 | 0.113127 | 0.492414 |
| 18917_53_finngen_R outcome  | 18917_53_Weighted    | 50  | 0.092357 | 0.072732 | 0.210141 |
| 18918_86_finngen_R outcome  | 18918_86_MR Egger    | 6   | 0.574558 | 0.498397 | 0.313191 |
| 18918_86_finngen_R outcome  | 18918_86_Weighted    | 6   | 0.28741  | 0.292321 | 0.325509 |
| 18918_86_finngen_R outcome  | 18918_86_Inverse va  | 6   | 0.210994 | 0.229353 | 0.357597 |
| 18918_86_finngen_R outcome  | 18918_86_Simple mc   | 6   | 0.360959 | 0.369203 | 0.373138 |
| 18918_86_finngen_R outcome  | 18918_86_Weighted    | 6   | 0.31148  | 0.391588 | 0.462437 |
| 18922_27_finngen_R outcome  | 18922_27_MR Egger    | 9   | 0.792693 | 0.487121 | 0.147699 |
| 18922_27_finngen_R outcome  | 18922_27_Weighted    | 9   | 0.345195 | 0.290729 | 0.235091 |
| 18922_27_finngen_R outcome  | 18922_27_Inverse va  | 9   | 0.068627 | 0.209798 | 0.743586 |
| 18922_27_finngen_R outcome  | 18922_27_Simple mc   | 9   | 0.433502 | 0.489022 | 0.401227 |
| 18922_27_finngen_R outcome  | 18922_27_Weighted    | 9   | 0.485725 | 0.42225  | 0.283231 |
| 18930_28_finngen_R outcome  | 18930_28_MR Egger    | 8   | 0.971154 | 0.866726 | 0.305342 |
| 18930_28_finngen_R outcome  | 18930_28_Weighted    | 8   | 0.530565 | 0.224488 | 0.018106 |
| 18930_28_finngen_R outcome  | 18930_28_Inverse va  | 8   | 0.328354 | 0.169161 | 0.052249 |
| 18930_28_finngen_R outcome  | 18930_28_Simple mc   | 8   | -0.13212 | 0.368898 | 0.730788 |
| 18930_28_finngen_R outcome  | 18930_28_Weighted    | 8   | 0.618199 | 0.294924 | 0.074295 |
| 18934_50_finngen_R outcome  | 18934_50_MR Egger    | 5   | 0.20173  | 0.482532 | 0.704021 |
| 18934_50_finngen_R outcome  | 18934_50_Weighted    | 5   | 0.226863 | 0.277166 | 0.413066 |
| 18934_50_finngen_R outcome  | 18934_50_Inverse va  | 5   | 0.195214 | 0.226673 | 0.38912  |
| 18934_50_finngen_R outcome  | 18934_50_Simple mc   | 5   | 0.230069 | 0.364712 | 0.562403 |
| 18934_50_finngen_R outcome  | 18934_50_Weighted    | 5   | 0.244426 | 0.338446 | 0.510136 |
| 19130_81_finngen_R outcome  | 19130_81_MR Egger    | 16  | 0.109894 | 0.286576 | 0.70713  |
| 19130_81_finngen_R outcome  | 19130_81_Weighted    | 16  | 0.007189 | 0.13637  | 0.957958 |
| 19130_81_finngen_R outcome  | 19130_81_Inverse va  | 16  | 0.127818 | 0.101034 | 0.205837 |
| 19130_81_finngen_R outcome  | 19130_81_Simple mc   | 16  | -0.03518 | 0.219688 | 0.874911 |
| 19130_81_finngen_R outcome  | 19130_81_Weighted    | 16  | -0.01309 | 0.140785 | 0.927127 |
| 19136_22_finngen_R outcome  | 19136_22_MR Egger    | 6   | -0.89078 | 3.019118 | 0.78264  |
| 19136_22_finngen_R outcome  | 19136_22_Weighted    | 6   | 0.124772 | 0.316577 | 0.693486 |
| 19136_22_finngen_R outcome  | 19136_22_Inverse va  | 6   | 0.111192 | 0.263171 | 0.672655 |
| 19136_22_finngen_R outcome  | 19136_22_Simple mc   | 6   | 0.366879 | 0.448397 | 0.45046  |
| 19136_22_finngen_R outcome  | 19136_22_Weighted    | 6   | 0.127716 | 0.376482 | 0.748217 |
| 19154_41_finngen_R outcome  | 19154_41_MR Egger    | 78  | -0.00097 | 0.07578  | 0.98987  |
| 19154_41_finngen_R outcome  | 19154_41_Weighted    | 78  | 0.051519 | 0.060519 | 0.394616 |
| 19154_41_finngen_R outcome  | 19154_41_Inverse va  | 78  | 0.073516 | 0.045029 | 0.102548 |
| 19154_41_finngen_R outcome  | 19154_41_Simple mc   | 78  | 0.200388 | 0.131389 | 0.131317 |
| 19154_41_finngen_R outcome  | 19154_41_Weighted    | 78  | 0.047982 | 0.055598 | 0.39081  |
| 19207_11_Cfinngen_R outcome | 19207_11_CInverse va | 2   | 0.028038 | 0.549425 | 0.959301 |
| 19213_1_Σfinngen_R outcome  | 19213_1_ΣMR Egger    | 10  | 0.272555 | 0.223408 | 0.257211 |
| 19213_1_Σfinngen_R outcome  | 19213_1_ΣWeighted    | 10  | 0.128078 | 0.165839 | 0.439937 |

|                            |                     |     |          |          |          |
|----------------------------|---------------------|-----|----------|----------|----------|
| 19213_1_§finngen_R outcome | 19213_1_§Inverse va | 10  | 0.16871  | 0.139832 | 0.227617 |
| 19213_1_§finngen_R outcome | 19213_1_§Simple mc  | 10  | 0.13371  | 0.346049 | 0.708183 |
| 19213_1_§finngen_R outcome | 19213_1_§Weighted   | 10  | 0.126923 | 0.172493 | 0.480579 |
| 19238_12_finngen_R outcome | 19238_12_Wald ratio | 1   | 0.543526 | 0.712879 | 0.445799 |
| 19251_56_finngen_R outcome | 19251_56_MR Egger   | 20  | 0.140475 | 0.232342 | 0.55299  |
| 19251_56_finngen_R outcome | 19251_56_Weighted   | 20  | 0.178894 | 0.163489 | 0.273858 |
| 19251_56_finngen_R outcome | 19251_56_Inverse va | 20  | -0.00683 | 0.121835 | 0.955301 |
| 19251_56_finngen_R outcome | 19251_56_Simple mc  | 20  | 0.084892 | 0.348673 | 0.81025  |
| 19251_56_finngen_R outcome | 19251_56_Weighted   | 20  | 0.150581 | 0.188917 | 0.435256 |
| 19267_14_finngen_R outcome | 19267_14_MR Egger   | 10  | 0.179011 | 0.300144 | 0.567386 |
| 19267_14_finngen_R outcome | 19267_14_Weighted   | 10  | 0.032199 | 0.17562  | 0.854528 |
| 19267_14_finngen_R outcome | 19267_14_Inverse va | 10  | -0.05186 | 0.144799 | 0.720215 |
| 19267_14_finngen_R outcome | 19267_14_Simple mc  | 10  | -0.07992 | 0.279095 | 0.781084 |
| 19267_14_finngen_R outcome | 19267_14_Weighted   | 10  | 0.071522 | 0.200076 | 0.728975 |
| 19273_3_⊂finngen_R outcome | 19273_3_⊂MR Egger   | 7   | 0.228001 | 0.581924 | 0.711344 |
| 19273_3_⊂finngen_R outcome | 19273_3_⊂Weighted   | 7   | 0.469809 | 0.262777 | 0.073798 |
| 19273_3_⊂finngen_R outcome | 19273_3_⊂Inverse va | 7   | 0.353775 | 0.217531 | 0.103882 |
| 19273_3_⊂finngen_R outcome | 19273_3_⊂Simple mc  | 7   | 0.455727 | 0.357025 | 0.248972 |
| 19273_3_⊂finngen_R outcome | 19273_3_⊂Weighted   | 7   | 0.512492 | 0.278388 | 0.11523  |
| 19334_62_finngen_R outcome | 19334_62_Inverse va | 2   | 0.511144 | 0.3366   | 0.128876 |
| 19347_37_finngen_R outcome | 19347_37_Wald ratio | 1   | 0.138122 | 0.764067 | 0.856546 |
| 19361_78_finngen_R outcome | 19361_78_MR Egger   | 138 | 0.034368 | 0.043538 | 0.431258 |
| 19361_78_finngen_R outcome | 19361_78_Weighted   | 138 | 0.052044 | 0.048579 | 0.284023 |
| 19361_78_finngen_R outcome | 19361_78_Inverse va | 138 | 0.074899 | 0.026971 | 0.005486 |
| 19361_78_finngen_R outcome | 19361_78_Simple mc  | 138 | 0.102567 | 0.081439 | 0.210016 |
| 19361_78_finngen_R outcome | 19361_78_Weighted   | 138 | 0.063089 | 0.0427   | 0.14184  |
| 19376_74_finngen_R outcome | 19376_74_Inverse va | 2   | -0.62849 | 0.957999 | 0.511797 |
| 19377_14_finngen_R outcome | 19377_14_MR Egger   | 84  | 0.009514 | 0.070512 | 0.892999 |
| 19377_14_finngen_R outcome | 19377_14_Weighted   | 84  | 0.026623 | 0.054712 | 0.626539 |
| 19377_14_finngen_R outcome | 19377_14_Inverse va | 84  | 0.04296  | 0.038525 | 0.264801 |
| 19377_14_finngen_R outcome | 19377_14_Simple mc  | 84  | -0.12234 | 0.104949 | 0.247057 |
| 19377_14_finngen_R outcome | 19377_14_Weighted   | 84  | 0.060961 | 0.049069 | 0.217608 |
| 19437_61_finngen_R outcome | 19437_61_MR Egger   | 86  | -0.14829 | 0.084159 | 0.081699 |
| 19437_61_finngen_R outcome | 19437_61_Weighted   | 86  | -0.05211 | 0.0647   | 0.420611 |
| 19437_61_finngen_R outcome | 19437_61_Inverse va | 86  | -0.10925 | 0.049381 | 0.026937 |
| 19437_61_finngen_R outcome | 19437_61_Simple mc  | 86  | -0.14284 | 0.142276 | 0.318259 |
| 19437_61_finngen_R outcome | 19437_61_Weighted   | 86  | -0.10444 | 0.064198 | 0.107457 |
| 19448_10⊂finngen_R outcome | 19448_10⊂MR Egger   | 4   | -1.10644 | 0.690414 | 0.250203 |
| 19448_10⊂finngen_R outcome | 19448_10⊂Weighted   | 4   | -0.1521  | 0.27428  | 0.579202 |
| 19448_10⊂finngen_R outcome | 19448_10⊂Inverse va | 4   | -0.20728 | 0.231466 | 0.370507 |
| 19448_10⊂finngen_R outcome | 19448_10⊂Simple mc  | 4   | 0.078236 | 0.388765 | 0.853381 |
| 19448_10⊂finngen_R outcome | 19448_10⊂Weighted   | 4   | -0.16572 | 0.302217 | 0.62162  |
| 19556_12_finngen_R outcome | 19556_12_MR Egger   | 85  | 0.023823 | 0.065064 | 0.715183 |
| 19556_12_finngen_R outcome | 19556_12_Weighted   | 85  | 0.015809 | 0.062912 | 0.801588 |
| 19556_12_finngen_R outcome | 19556_12_Inverse va | 85  | 0.012179 | 0.042447 | 0.77417  |
| 19556_12_finngen_R outcome | 19556_12_Simple mc  | 85  | 0.017073 | 0.105869 | 0.872274 |
| 19556_12_finngen_R outcome | 19556_12_Weighted   | 85  | 0.005074 | 0.053568 | 0.924758 |
| 19581_15_finngen_R outcome | 19581_15_Inverse va | 2   | 0.809727 | 0.557223 | 0.146183 |
| 19590_46_finngen_R outcome | 19590_46_MR Egger   | 91  | -0.01707 | 0.064492 | 0.791813 |
| 19590_46_finngen_R outcome | 19590_46_Weighted   | 91  | 0.029832 | 0.057794 | 0.605727 |
| 19590_46_finngen_R outcome | 19590_46_Inverse va | 91  | 0.037679 | 0.038158 | 0.323422 |
| 19590_46_finngen_R outcome | 19590_46_Simple mc  | 91  | 0.090809 | 0.084993 | 0.288188 |
| 19590_46_finngen_R outcome | 19590_46_Weighted   | 91  | 0.029806 | 0.053778 | 0.580787 |
| 19606_28_finngen_R outcome | 19606_28_MR Egger   | 3   | 1.960522 | 1.028791 | 0.307649 |
| 19606_28_finngen_R outcome | 19606_28_Weighted   | 3   | 0.920342 | 0.543966 | 0.090663 |
| 19606_28_finngen_R outcome | 19606_28_Inverse va | 3   | 0.747122 | 0.453095 | 0.099162 |
| 19606_28_finngen_R outcome | 19606_28_Simple mc  | 3   | 1.271324 | 0.729985 | 0.223708 |
| 19606_28_finngen_R outcome | 19606_28_Weighted   | 3   | 1.259338 | 0.79294  | 0.253172 |

|                             |                      |     |          |          |          |
|-----------------------------|----------------------|-----|----------|----------|----------|
| 19614_8_Tfinngen_R outcome  | 19614_8_TMR Egger    | 58  | 0.057801 | 0.070697 | 0.417059 |
| 19614_8_Tfinngen_R outcome  | 19614_8_TWeighted    | 58  | 0.02195  | 0.069053 | 0.750577 |
| 19614_8_Tfinngen_R outcome  | 19614_8_TInverse va  | 58  | -0.0465  | 0.045343 | 0.305068 |
| 19614_8_Tfinngen_R outcome  | 19614_8_TSimple mc   | 58  | 0.038949 | 0.113772 | 0.733354 |
| 19614_8_Tfinngen_R outcome  | 19614_8_TWeighted    | 58  | 0.023115 | 0.063514 | 0.71725  |
| 19622_7_Ifinngen_R outcome  | 19622_7_IfWald ratio | 1   | 0.372128 | 0.412937 | 0.367496 |
| 19631_13_finngen_R outcome  | 19631_13_MR Egger    | 20  | -0.16574 | 0.186971 | 0.387065 |
| 19631_13_finngen_R outcome  | 19631_13_Weighted    | 20  | -0.05821 | 0.126812 | 0.646225 |
| 19631_13_finngen_R outcome  | 19631_13_Inverse va  | 20  | -0.05823 | 0.090489 | 0.519893 |
| 19631_13_finngen_R outcome  | 19631_13_Simple mc   | 20  | -0.00121 | 0.195677 | 0.99512  |
| 19631_13_finngen_R outcome  | 19631_13_Weighted    | 20  | -0.04786 | 0.130025 | 0.716886 |
| 19635_69_finngen_R outcome  | 19635_69_Wald ratio  | 1   | 0.128855 | 0.81363  | 0.874165 |
| 19637_9_Cfinngen_R outcome  | 19637_9_CWald ratio  | 1   | -0.5563  | 1.035643 | 0.591158 |
| 2190_55_Ffinngen_R outcome  | 2190_55_FMR Egger    | 39  | -0.0102  | 0.099138 | 0.918624 |
| 2190_55_Ffinngen_R outcome  | 2190_55_FWeighted    | 39  | -0.03243 | 0.078887 | 0.681034 |
| 2190_55_Ffinngen_R outcome  | 2190_55_FInverse va  | 39  | 0.004356 | 0.054147 | 0.935884 |
| 2190_55_Ffinngen_R outcome  | 2190_55_FSimple mc   | 39  | 0.032483 | 0.135451 | 0.811763 |
| 2190_55_Ffinngen_R outcome  | 2190_55_FWeighted    | 39  | -0.0427  | 0.079232 | 0.593125 |
| 2192_63_Cfinngen_R outcome  | 2192_63_CWald ratio  | 1   | -0.69653 | 0.708966 | 0.325873 |
| 2201_17_Cfinngen_R outcome  | 2201_17_CMR Egger    | 23  | -0.44932 | 0.211052 | 0.045259 |
| 2201_17_Cfinngen_R outcome  | 2201_17_CWeighted    | 23  | -0.15006 | 0.14582  | 0.303441 |
| 2201_17_Cfinngen_R outcome  | 2201_17_CInverse va  | 23  | 0.012353 | 0.103386 | 0.904895 |
| 2201_17_Cfinngen_R outcome  | 2201_17_CSimple mc   | 23  | -0.22977 | 0.241077 | 0.350899 |
| 2201_17_Cfinngen_R outcome  | 2201_17_CWeighted    | 23  | -0.22318 | 0.175443 | 0.216624 |
| 2212_69_Ffinngen_R outcome  | 2212_69_FMR Egger    | 13  | -0.22286 | 0.287307 | 0.454286 |
| 2212_69_Ffinngen_R outcome  | 2212_69_FWeighted    | 13  | -0.11687 | 0.211493 | 0.580554 |
| 2212_69_Ffinngen_R outcome  | 2212_69_FInverse va  | 13  | -0.01952 | 0.169227 | 0.908178 |
| 2212_69_Ffinngen_R outcome  | 2212_69_FSimple mc   | 13  | -0.40209 | 0.337512 | 0.256554 |
| 2212_69_Ffinngen_R outcome  | 2212_69_FWeighted    | 13  | -0.19153 | 0.296301 | 0.53018  |
| 2278_61_Tfinngen_R outcome  | 2278_61_TInverse va  | 2   | 0.294296 | 0.376098 | 0.433922 |
| 2381_52_Cfinngen_R outcome  | 2381_52_CMR Egger    | 14  | -0.30715 | 0.328073 | 0.367613 |
| 2381_52_Cfinngen_R outcome  | 2381_52_CWeighted    | 14  | -0.18214 | 0.183606 | 0.321192 |
| 2381_52_Cfinngen_R outcome  | 2381_52_CInverse va  | 14  | -0.11174 | 0.138268 | 0.419002 |
| 2381_52_Cfinngen_R outcome  | 2381_52_CSimple mc   | 14  | -0.26774 | 0.288323 | 0.370014 |
| 2381_52_Cfinngen_R outcome  | 2381_52_CWeighted    | 14  | -0.23009 | 0.247478 | 0.36945  |
| 2418_55_ffinngen_R outcome  | 2418_55_fMR Egger    | 35  | 0.147771 | 0.155234 | 0.348058 |
| 2418_55_ffinngen_R outcome  | 2418_55_fWeighted    | 35  | 0.026152 | 0.105854 | 0.804861 |
| 2418_55_ffinngen_R outcome  | 2418_55_fInverse va  | 35  | -0.01715 | 0.072049 | 0.811808 |
| 2418_55_ffinngen_R outcome  | 2418_55_fSimple mc   | 35  | -0.11733 | 0.183427 | 0.526696 |
| 2418_55_ffinngen_R outcome  | 2418_55_fWeighted    | 35  | 0.027513 | 0.104683 | 0.794277 |
| 2421_7_BI finngen_R outcome | 2421_7_BI Inverse va | 2   | 0.373328 | 0.353596 | 0.291057 |
| 2436_49_Cfinngen_R outcome  | 2436_49_CMR Egger    | 27  | -0.0853  | 0.169619 | 0.619436 |
| 2436_49_Cfinngen_R outcome  | 2436_49_CWeighted    | 27  | 0.015877 | 0.127416 | 0.900832 |
| 2436_49_Cfinngen_R outcome  | 2436_49_CInverse va  | 27  | -0.09531 | 0.085955 | 0.267505 |
| 2436_49_Cfinngen_R outcome  | 2436_49_CSimple mc   | 27  | -0.29869 | 0.23186  | 0.209018 |
| 2436_49_Cfinngen_R outcome  | 2436_49_CWeighted    | 27  | -0.0047  | 0.158094 | 0.976492 |
| 2474_54_ffinngen_R outcome  | 2474_54_ffMR Egger   | 14  | 0.284684 | 0.176518 | 0.132766 |
| 2474_54_ffinngen_R outcome  | 2474_54_ffWeighted   | 14  | 0.184117 | 0.140335 | 0.189526 |
| 2474_54_ffinngen_R outcome  | 2474_54_ffInverse va | 14  | 0.198016 | 0.108867 | 0.068928 |
| 2474_54_ffinngen_R outcome  | 2474_54_ffSimple mc  | 14  | 0.437762 | 0.232008 | 0.081714 |
| 2474_54_ffinngen_R outcome  | 2474_54_ffWeighted   | 14  | 0.187776 | 0.127534 | 0.164718 |
| 2475_1_KI finngen_R outcome | 2475_1_KI Wald ratio | 1   | 1.264562 | 0.75367  | 0.093372 |
| 2480_58_Tfinngen_R outcome  | 2480_58_TMR Egger    | 109 | 0.041471 | 0.057017 | 0.468606 |
| 2480_58_Tfinngen_R outcome  | 2480_58_TWeighted    | 109 | 0.066168 | 0.054304 | 0.22305  |
| 2480_58_Tfinngen_R outcome  | 2480_58_TInverse va  | 109 | 0.053257 | 0.034132 | 0.118679 |
| 2480_58_Tfinngen_R outcome  | 2480_58_TSimple mc   | 109 | 0.117806 | 0.106249 | 0.269993 |
| 2480_58_Tfinngen_R outcome  | 2480_58_TWeighted    | 109 | 0.088047 | 0.046388 | 0.060359 |
| 2516_57_Cfinngen_R outcome  | 2516_57_CMR Egger    | 7   | -0.08855 | 0.774876 | 0.913466 |

|                              |                       |    |          |          |          |
|------------------------------|-----------------------|----|----------|----------|----------|
| 2516_57_C finngen_R outcome  | 2516_57_C Weighted    | 7  | -0.3256  | 0.234184 | 0.164413 |
| 2516_57_C finngen_R outcome  | 2516_57_C Inverse va  | 7  | -0.28409 | 0.228881 | 0.214523 |
| 2516_57_C finngen_R outcome  | 2516_57_C Simple mc   | 7  | -0.19771 | 0.348713 | 0.591306 |
| 2516_57_C finngen_R outcome  | 2516_57_C Weighted    | 7  | -0.30132 | 0.274831 | 0.31496  |
| 2567_5_Cf finngen_R outcome  | 2567_5_Cf MR Egger    | 14 | -0.37085 | 0.55207  | 0.514469 |
| 2567_5_Cf finngen_R outcome  | 2567_5_Cf Weighted    | 14 | 0.092542 | 0.206678 | 0.654327 |
| 2567_5_Cf finngen_R outcome  | 2567_5_Cf Inverse va  | 14 | 0.110966 | 0.159342 | 0.48618  |
| 2567_5_Cf finngen_R outcome  | 2567_5_Cf Simple mc   | 14 | 0.132249 | 0.333337 | 0.697992 |
| 2567_5_Cf finngen_R outcome  | 2567_5_Cf Weighted    | 14 | 0.104324 | 0.283276 | 0.718593 |
| 2571_12_If finngen_R outcome | 2571_12_If MR Egger   | 37 | 0.037463 | 0.100897 | 0.71265  |
| 2571_12_If finngen_R outcome | 2571_12_If Weighted   | 37 | 0.04453  | 0.093738 | 0.634755 |
| 2571_12_If finngen_R outcome | 2571_12_If Inverse va | 37 | 0.117909 | 0.06982  | 0.091265 |
| 2571_12_If finngen_R outcome | 2571_12_If Simple mc  | 37 | 0.160236 | 0.225063 | 0.481077 |
| 2571_12_If finngen_R outcome | 2571_12_If Weighted   | 37 | 0.042275 | 0.089419 | 0.639229 |
| 2579_17_M finngen_R outcome  | 2579_17_M Wald ratio  | 1  | -0.42665 | 0.39372  | 0.278523 |
| 2580_83_M finngen_R outcome  | 2580_83_M MR Egger    | 42 | 0.119462 | 0.07581  | 0.122945 |
| 2580_83_M finngen_R outcome  | 2580_83_M Weighted    | 42 | 0.13016  | 0.071685 | 0.069414 |
| 2580_83_M finngen_R outcome  | 2580_83_M Inverse va  | 42 | 0.138544 | 0.051042 | 0.006641 |
| 2580_83_M finngen_R outcome  | 2580_83_M Simple mc   | 42 | 0.094404 | 0.110762 | 0.398989 |
| 2580_83_M finngen_R outcome  | 2580_83_M Weighted    | 42 | 0.139816 | 0.065724 | 0.039456 |
| 2590_69_F finngen_R outcome  | 2590_69_F MR Egger    | 32 | -0.03196 | 0.139791 | 0.820731 |
| 2590_69_F finngen_R outcome  | 2590_69_F Weighted    | 32 | -0.12251 | 0.099137 | 0.216538 |
| 2590_69_F finngen_R outcome  | 2590_69_F Inverse va  | 32 | -0.02858 | 0.070921 | 0.68691  |
| 2590_69_F finngen_R outcome  | 2590_69_F Simple mc   | 32 | -0.14448 | 0.193742 | 0.461431 |
| 2590_69_F finngen_R outcome  | 2590_69_F Weighted    | 32 | -0.07033 | 0.088934 | 0.435045 |
| 2597_8_Vf finngen_R outcome  | 2597_8_Vf MR Egger    | 23 | -0.15863 | 0.196106 | 0.427654 |
| 2597_8_Vf finngen_R outcome  | 2597_8_Vf Weighted    | 23 | -0.12493 | 0.110406 | 0.257826 |
| 2597_8_Vf finngen_R outcome  | 2597_8_Vf Inverse va  | 23 | -0.22011 | 0.10093  | 0.029201 |
| 2597_8_Vf finngen_R outcome  | 2597_8_Vf Simple mc   | 23 | -0.25253 | 0.27095  | 0.361435 |
| 2597_8_Vf finngen_R outcome  | 2597_8_Vf Weighted    | 23 | -0.12634 | 0.112501 | 0.273521 |
| 2602_2_Af finngen_R outcome  | 2602_2_Af MR Egger    | 7  | 0.11594  | 0.549161 | 0.841128 |
| 2602_2_Af finngen_R outcome  | 2602_2_Af Weighted    | 7  | -0.14122 | 0.248539 | 0.569887 |
| 2602_2_Af finngen_R outcome  | 2602_2_Af Inverse va  | 7  | -0.17112 | 0.203986 | 0.401536 |
| 2602_2_Af finngen_R outcome  | 2602_2_Af Simple mc   | 7  | -0.12262 | 0.373396 | 0.753783 |
| 2602_2_Af finngen_R outcome  | 2602_2_Af Weighted    | 7  | -0.13257 | 0.253668 | 0.619968 |
| 2609_59_C finngen_R outcome  | 2609_59_C MR Egger    | 21 | 0.255656 | 0.185761 | 0.184747 |
| 2609_59_C finngen_R outcome  | 2609_59_C Weighted    | 21 | 0.346268 | 0.12541  | 0.005761 |
| 2609_59_C finngen_R outcome  | 2609_59_C Inverse va  | 21 | 0.207221 | 0.089208 | 0.020186 |
| 2609_59_C finngen_R outcome  | 2609_59_C Simple mc   | 21 | 0.2519   | 0.24804  | 0.321967 |
| 2609_59_C finngen_R outcome  | 2609_59_C Weighted    | 21 | 0.323221 | 0.138003 | 0.029634 |
| 2611_72_T finngen_R outcome  | 2611_72_T MR Egger    | 8  | -0.27117 | 0.311738 | 0.417809 |
| 2611_72_T finngen_R outcome  | 2611_72_T Weighted    | 8  | -0.27955 | 0.195118 | 0.151942 |
| 2611_72_T finngen_R outcome  | 2611_72_T Inverse va  | 8  | -0.20145 | 0.165304 | 0.222962 |
| 2611_72_T finngen_R outcome  | 2611_72_T Simple mc   | 8  | -0.32981 | 0.268517 | 0.259043 |
| 2611_72_T finngen_R outcome  | 2611_72_T Weighted    | 8  | -0.29699 | 0.218502 | 0.216237 |
| 2615_60_E finngen_R outcome  | 2615_60_E MR Egger    | 11 | 0.736271 | 0.626458 | 0.270033 |
| 2615_60_E finngen_R outcome  | 2615_60_E Weighted    | 11 | -0.1402  | 0.232567 | 0.546626 |
| 2615_60_E finngen_R outcome  | 2615_60_E Inverse va  | 11 | -0.07311 | 0.228495 | 0.748986 |
| 2615_60_E finngen_R outcome  | 2615_60_E Simple mc   | 11 | -0.44341 | 0.379684 | 0.269957 |
| 2615_60_E finngen_R outcome  | 2615_60_E Weighted    | 11 | -0.16338 | 0.286235 | 0.58075  |
| 2617_56_E finngen_R outcome  | 2617_56_E Inverse va  | 2  | 0.529284 | 0.319986 | 0.09811  |
| 2620_4_ILf finngen_R outcome | 2620_4_ILf MR Egger   | 30 | -0.04478 | 0.144869 | 0.75954  |
| 2620_4_ILf finngen_R outcome | 2620_4_ILf Weighted   | 30 | -0.13317 | 0.119979 | 0.267032 |
| 2620_4_ILf finngen_R outcome | 2620_4_ILf Inverse va | 30 | 0.007649 | 0.081498 | 0.925224 |
| 2620_4_ILf finngen_R outcome | 2620_4_ILf Simple mc  | 30 | -0.06396 | 0.238123 | 0.790147 |
| 2620_4_ILf finngen_R outcome | 2620_4_ILf Weighted   | 30 | -0.08483 | 0.12865  | 0.514866 |
| 2631_50_If finngen_R outcome | 2631_50_If Inverse va | 2  | 0.996673 | 0.353806 | 0.004847 |
| 2632_5_ILf finngen_R outcome | 2632_5_ILf Inverse va | 2  | 0.462447 | 0.406129 | 0.254841 |

|                            |                     |     |          |          |          |
|----------------------------|---------------------|-----|----------|----------|----------|
| 2637_77_␣finngen_R outcome | 2637_77_␣MR Egger   | 100 | -0.00526 | 0.042788 | 0.90235  |
| 2637_77_␣finngen_R outcome | 2637_77_␣Weighted   | 100 | 0.059789 | 0.048239 | 0.215187 |
| 2637_77_␣finngen_R outcome | 2637_77_␣Inverse va | 100 | -0.01527 | 0.02855  | 0.592718 |
| 2637_77_␣finngen_R outcome | 2637_77_␣Simple mc  | 100 | -0.01276 | 0.092474 | 0.890559 |
| 2637_77_␣finngen_R outcome | 2637_77_␣Weighted   | 100 | 0.030098 | 0.040928 | 0.463837 |
| 2644_11_␣finngen_R outcome | 2644_11_␣MR Egger   | 3   | 1.138608 | 1.512958 | 0.589288 |
| 2644_11_␣finngen_R outcome | 2644_11_␣Weighted   | 3   | 0.296372 | 0.354551 | 0.403208 |
| 2644_11_␣finngen_R outcome | 2644_11_␣Inverse va | 3   | 0.328459 | 0.333238 | 0.3243   |
| 2644_11_␣finngen_R outcome | 2644_11_␣Simple mc  | 3   | -0.06423 | 0.488996 | 0.907513 |
| 2644_11_␣finngen_R outcome | 2644_11_␣Weighted   | 3   | 0.625753 | 0.458092 | 0.305261 |
| 2652_15_␣finngen_R outcome | 2652_15_␣MR Egger   | 17  | -0.00618 | 0.269045 | 0.981977 |
| 2652_15_␣finngen_R outcome | 2652_15_␣Weighted   | 17  | -0.00476 | 0.161872 | 0.976534 |
| 2652_15_␣finngen_R outcome | 2652_15_␣Inverse va | 17  | -0.13443 | 0.132892 | 0.311743 |
| 2652_15_␣finngen_R outcome | 2652_15_␣Simple mc  | 17  | 0.057005 | 0.266856 | 0.833545 |
| 2652_15_␣finngen_R outcome | 2652_15_␣Weighted   | 17  | 0.019622 | 0.175576 | 0.912404 |
| 2654_19_␣finngen_R outcome | 2654_19_␣MR Egger   | 3   | 0.463024 | 0.472157 | 0.506217 |
| 2654_19_␣finngen_R outcome | 2654_19_␣Weighted   | 3   | 0.11457  | 0.302214 | 0.704612 |
| 2654_19_␣finngen_R outcome | 2654_19_␣Inverse va | 3   | 0.098596 | 0.281555 | 0.7262   |
| 2654_19_␣finngen_R outcome | 2654_19_␣Simple mc  | 3   | 0.366522 | 0.43241  | 0.485907 |
| 2654_19_␣finngen_R outcome | 2654_19_␣Weighted   | 3   | 0.32577  | 0.364717 | 0.465996 |
| 2658_27_␣finngen_R outcome | 2658_27_␣MR Egger   | 24  | -0.01122 | 0.210364 | 0.957949 |
| 2658_27_␣finngen_R outcome | 2658_27_␣Weighted   | 24  | 0.024363 | 0.143006 | 0.864724 |
| 2658_27_␣finngen_R outcome | 2658_27_␣Inverse va | 24  | 0.092937 | 0.098766 | 0.346714 |
| 2658_27_␣finngen_R outcome | 2658_27_␣Simple mc  | 24  | 0.055888 | 0.257742 | 0.830248 |
| 2658_27_␣finngen_R outcome | 2658_27_␣Weighted   | 24  | -0.09278 | 0.16959  | 0.589598 |
| 2665_26_␣finngen_R outcome | 2665_26_␣MR Egger   | 4   | -0.23165 | 0.563826 | 0.721018 |
| 2665_26_␣finngen_R outcome | 2665_26_␣Weighted   | 4   | 0.130388 | 0.230958 | 0.572379 |
| 2665_26_␣finngen_R outcome | 2665_26_␣Inverse va | 4   | 0.193918 | 0.213188 | 0.36303  |
| 2665_26_␣finngen_R outcome | 2665_26_␣Simple mc  | 4   | 0.158852 | 0.338605 | 0.670962 |
| 2665_26_␣finngen_R outcome | 2665_26_␣Weighted   | 4   | 0.12236  | 0.256151 | 0.66552  |
| 2677_1_␣finngen_R outcome  | 2677_1_␣MR Egger    | 11  | -0.29718 | 0.471752 | 0.544389 |
| 2677_1_␣finngen_R outcome  | 2677_1_␣Weighted    | 11  | -0.47908 | 0.204858 | 0.019357 |
| 2677_1_␣finngen_R outcome  | 2677_1_␣Inverse va  | 11  | -0.58693 | 0.155552 | 0.000161 |
| 2677_1_␣finngen_R outcome  | 2677_1_␣Simple mc   | 11  | -0.56775 | 0.298369 | 0.086217 |
| 2677_1_␣finngen_R outcome  | 2677_1_␣Weighted    | 11  | -0.49905 | 0.256262 | 0.080092 |
| 2681_23_␣finngen_R outcome | 2681_23_␣Inverse va | 2   | 0.50355  | 0.280765 | 0.072894 |
| 2683_1_␣finngen_R outcome  | 2683_1_␣Wald ratio  | 1   | 0.731646 | 0.537305 | 0.173294 |
| 2687_2_␣finngen_R outcome  | 2687_2_␣MR Egger    | 79  | -0.00826 | 0.03756  | 0.826506 |
| 2687_2_␣finngen_R outcome  | 2687_2_␣Weighted    | 79  | 0.000913 | 0.042247 | 0.982757 |
| 2687_2_␣finngen_R outcome  | 2687_2_␣Inverse va  | 79  | 0.024464 | 0.026672 | 0.359041 |
| 2687_2_␣finngen_R outcome  | 2687_2_␣Simple mc   | 79  | 0.001957 | 0.073284 | 0.978764 |
| 2687_2_␣finngen_R outcome  | 2687_2_␣Weighted    | 79  | -0.01517 | 0.036046 | 0.675018 |
| 2692_74_␣finngen_R outcome | 2692_74_␣MR Egger   | 109 | -0.12692 | 0.059973 | 0.036632 |
| 2692_74_␣finngen_R outcome | 2692_74_␣Weighted   | 109 | -0.11301 | 0.05222  | 0.030463 |
| 2692_74_␣finngen_R outcome | 2692_74_␣Inverse va | 109 | -0.07687 | 0.03299  | 0.019807 |
| 2692_74_␣finngen_R outcome | 2692_74_␣Simple mc  | 109 | -0.07285 | 0.088253 | 0.410958 |
| 2692_74_␣finngen_R outcome | 2692_74_␣Weighted   | 109 | -0.11298 | 0.051306 | 0.029778 |
| 2697_7_␣finngen_R outcome  | 2697_7_␣MR Egger    | 3   | 0.827332 | 1.657217 | 0.705225 |
| 2697_7_␣finngen_R outcome  | 2697_7_␣Weighted    | 3   | -0.32659 | 0.324146 | 0.313668 |
| 2697_7_␣finngen_R outcome  | 2697_7_␣Inverse va  | 3   | -0.31273 | 0.287873 | 0.277323 |
| 2697_7_␣finngen_R outcome  | 2697_7_␣Simple mc   | 3   | -0.51424 | 0.404285 | 0.331272 |
| 2697_7_␣finngen_R outcome  | 2697_7_␣Weighted    | 3   | -0.50902 | 0.387652 | 0.319581 |
| 2700_56_␣finngen_R outcome | 2700_56_␣Inverse va | 2   | 0.111142 | 0.451998 | 0.805767 |
| 2705_5_␣finngen_R outcome  | 2705_5_␣MR Egger    | 92  | 0.024815 | 0.049415 | 0.616768 |
| 2705_5_␣finngen_R outcome  | 2705_5_␣Weighted    | 92  | 0.041494 | 0.048484 | 0.392089 |
| 2705_5_␣finngen_R outcome  | 2705_5_␣Inverse va  | 92  | 0.008382 | 0.032128 | 0.794165 |
| 2705_5_␣finngen_R outcome  | 2705_5_␣Simple mc   | 92  | -0.17172 | 0.076878 | 0.027958 |
| 2705_5_␣finngen_R outcome  | 2705_5_␣Weighted    | 92  | 0.032765 | 0.041372 | 0.430448 |

|                               |                        |     |          |          |          |
|-------------------------------|------------------------|-----|----------|----------|----------|
| 2731_29_F finngen_R outcome   | 2731_29_F MR Egger     | 14  | 0.134621 | 0.30958  | 0.671389 |
| 2731_29_F finngen_R outcome   | 2731_29_F Weighted     | 14  | -0.05109 | 0.170836 | 0.764913 |
| 2731_29_F finngen_R outcome   | 2731_29_F Inverse va   | 14  | -0.09174 | 0.140269 | 0.513092 |
| 2731_29_F finngen_R outcome   | 2731_29_F Simple mc    | 14  | -0.15459 | 0.265171 | 0.56987  |
| 2731_29_F finngen_R outcome   | 2731_29_F Weighted     | 14  | -0.0458  | 0.172939 | 0.795296 |
| 2737_22_I finngen_R outcome   | 2737_22_I Wald ratio   | 1   | -0.25634 | 0.579271 | 0.658113 |
| 2741_22_S finngen_R outcome   | 2741_22_S MR Egger     | 130 | -0.01451 | 0.044661 | 0.745835 |
| 2741_22_S finngen_R outcome   | 2741_22_S Weighted     | 130 | -0.00223 | 0.048802 | 0.963504 |
| 2741_22_S finngen_R outcome   | 2741_22_S Inverse va   | 130 | 0.0051   | 0.028598 | 0.858458 |
| 2741_22_S finngen_R outcome   | 2741_22_S Simple mc    | 130 | -0.01926 | 0.09163  | 0.833814 |
| 2741_22_S finngen_R outcome   | 2741_22_S Weighted     | 130 | 0.007632 | 0.041397 | 0.854027 |
| 2742_68_S finngen_R outcome   | 2742_68_S MR Egger     | 25  | -0.16868 | 0.126532 | 0.195543 |
| 2742_68_S finngen_R outcome   | 2742_68_S Weighted     | 25  | -0.10866 | 0.101822 | 0.285904 |
| 2742_68_S finngen_R outcome   | 2742_68_S Inverse va   | 25  | 0.005503 | 0.072412 | 0.939421 |
| 2742_68_S finngen_R outcome   | 2742_68_S Simple mc    | 25  | 0.02061  | 0.18018  | 0.909883 |
| 2742_68_S finngen_R outcome   | 2742_68_S Weighted     | 25  | -0.10963 | 0.104999 | 0.306825 |
| 2743_5_S_I finngen_R outcome  | 2743_5_S_I MR Egger    | 6   | -0.33896 | 0.716572 | 0.660854 |
| 2743_5_S_I finngen_R outcome  | 2743_5_S_I Weighted    | 6   | -0.08594 | 0.278404 | 0.757565 |
| 2743_5_S_I finngen_R outcome  | 2743_5_S_I Inverse va  | 6   | -0.07006 | 0.220065 | 0.750196 |
| 2743_5_S_I finngen_R outcome  | 2743_5_S_I Simple mc   | 6   | -0.10961 | 0.379766 | 0.784449 |
| 2743_5_S_I finngen_R outcome  | 2743_5_S_I Weighted    | 6   | -0.12092 | 0.334    | 0.732126 |
| 2750_3_Af finngen_R outcome   | 2750_3_Af MR Egger     | 24  | 0.045591 | 0.169952 | 0.791    |
| 2750_3_Af finngen_R outcome   | 2750_3_Af Weighted     | 24  | 0.09802  | 0.12263  | 0.424108 |
| 2750_3_Af finngen_R outcome   | 2750_3_Af Inverse va   | 24  | -0.04637 | 0.109779 | 0.672732 |
| 2750_3_Af finngen_R outcome   | 2750_3_Af Simple mc    | 24  | 0.236595 | 0.197898 | 0.244058 |
| 2750_3_Af finngen_R outcome   | 2750_3_Af Weighted     | 24  | 0.162611 | 0.123384 | 0.200504 |
| 2754_50_C finngen_R outcome   | 2754_50_C Wald ratio   | 1   | 0.619371 | 0.454853 | 0.173294 |
| 2771_35_I_I finngen_R outcome | 2771_35_I_I MR Egger   | 3   | -2.79298 | 9.192493 | 0.812217 |
| 2771_35_I_I finngen_R outcome | 2771_35_I_I Weighted   | 3   | -0.34061 | 0.34834  | 0.328167 |
| 2771_35_I_I finngen_R outcome | 2771_35_I_I Inverse va | 3   | -0.31493 | 0.329714 | 0.339497 |
| 2771_35_I_I finngen_R outcome | 2771_35_I_I Simple mc  | 3   | -0.32763 | 0.432082 | 0.527468 |
| 2771_35_I_I finngen_R outcome | 2771_35_I_I Weighted   | 3   | -0.37277 | 0.444041 | 0.489547 |
| 2774_10_II finngen_R outcome  | 2774_10_II MR Egger    | 48  | -0.17622 | 0.110389 | 0.11725  |
| 2774_10_II finngen_R outcome  | 2774_10_II Weighted    | 48  | -0.15068 | 0.099165 | 0.12864  |
| 2774_10_II finngen_R outcome  | 2774_10_II Inverse va  | 48  | -0.11887 | 0.065191 | 0.068244 |
| 2774_10_II finngen_R outcome  | 2774_10_II Simple mc   | 48  | -0.01086 | 0.193143 | 0.955383 |
| 2774_10_II finngen_R outcome  | 2774_10_II Weighted    | 48  | -0.14078 | 0.116051 | 0.231173 |
| 2778_10_II finngen_R outcome  | 2778_10_II Inverse va  | 2   | 0.121397 | 0.678516 | 0.858004 |
| 2780_35_L finngen_R outcome   | 2780_35_L MR Egger     | 15  | 0.27201  | 0.185663 | 0.166663 |
| 2780_35_L finngen_R outcome   | 2780_35_L Weighted     | 15  | 0.107864 | 0.14782  | 0.465573 |
| 2780_35_L finngen_R outcome   | 2780_35_L Inverse va   | 15  | 0.109037 | 0.112013 | 0.33034  |
| 2780_35_L finngen_R outcome   | 2780_35_L Simple mc    | 15  | 0.151754 | 0.214718 | 0.491313 |
| 2780_35_L finngen_R outcome   | 2780_35_L Weighted     | 15  | 0.110393 | 0.171143 | 0.529337 |
| 2783_18_C finngen_R outcome   | 2783_18_C Inverse va   | 2   | 0.016029 | 0.415792 | 0.969248 |
| 2789_26_I finngen_R outcome   | 2789_26_I MR Egger     | 34  | 0.048741 | 0.119499 | 0.686082 |
| 2789_26_I finngen_R outcome   | 2789_26_I Weighted     | 34  | 0.029033 | 0.092511 | 0.75365  |
| 2789_26_I finngen_R outcome   | 2789_26_I Inverse va   | 34  | -0.0642  | 0.062836 | 0.306926 |
| 2789_26_I finngen_R outcome   | 2789_26_I Simple mc    | 34  | -0.14197 | 0.158845 | 0.377935 |
| 2789_26_I finngen_R outcome   | 2789_26_I Weighted     | 34  | 0.010453 | 0.101142 | 0.918313 |
| 2797_56_f finngen_R outcome   | 2797_56_f Wald ratio   | 1   | 0.147347 | 0.503387 | 0.769743 |
| 2811_27_f finngen_R outcome   | 2811_27_f Wald ratio   | 1   | -0.63953 | 0.525805 | 0.223873 |
| 2813_11_f finngen_R outcome   | 2813_11_f MR Egger     | 10  | 0.033408 | 0.179783 | 0.857208 |
| 2813_11_f finngen_R outcome   | 2813_11_f Weighted     | 10  | -0.00313 | 0.150752 | 0.983435 |
| 2813_11_f finngen_R outcome   | 2813_11_f Inverse va   | 10  | -0.07618 | 0.121731 | 0.531452 |
| 2813_11_f finngen_R outcome   | 2813_11_f Simple mc    | 10  | -0.08436 | 0.266584 | 0.758891 |
| 2813_11_f finngen_R outcome   | 2813_11_f Weighted     | 10  | -0.01039 | 0.148487 | 0.945747 |
| 2816_50_E finngen_R outcome   | 2816_50_E MR Egger     | 34  | -0.1142  | 0.094494 | 0.235711 |
| 2816_50_E finngen_R outcome   | 2816_50_E Weighted     | 34  | -0.21395 | 0.092255 | 0.020389 |

|                             |                      |    |          |          |          |
|-----------------------------|----------------------|----|----------|----------|----------|
| 2816_50_E finngen_R outcome | 2816_50_E Inverse va | 34 | -0.18459 | 0.06367  | 0.003742 |
| 2816_50_E finngen_R outcome | 2816_50_E Simple mc  | 34 | -0.08706 | 0.161937 | 0.59444  |
| 2816_50_E finngen_R outcome | 2816_50_E Weighted   | 34 | -0.17961 | 0.091321 | 0.057666 |
| 2819_23_C finngen_R outcome | 2819_23_C MR Egger   | 7  | 0.390758 | 0.551664 | 0.510389 |
| 2819_23_C finngen_R outcome | 2819_23_C Weighted   | 7  | 0.274909 | 0.201874 | 0.173266 |
| 2819_23_C finngen_R outcome | 2819_23_C Inverse va | 7  | 0.160033 | 0.16861  | 0.342553 |
| 2819_23_C finngen_R outcome | 2819_23_C Simple mc  | 7  | 0.322714 | 0.317817 | 0.349094 |
| 2819_23_C finngen_R outcome | 2819_23_C Weighted   | 7  | 0.297618 | 0.222268 | 0.229066 |
| 2827_23_C finngen_R outcome | 2827_23_C Inverse va | 2  | 0.130263 | 0.353966 | 0.712866 |
| 2828_82_S finngen_R outcome | 2828_82_S MR Egger   | 8  | 0.521276 | 0.315218 | 0.149273 |
| 2828_82_S finngen_R outcome | 2828_82_S Weighted   | 8  | 0.207874 | 0.261991 | 0.427523 |
| 2828_82_S finngen_R outcome | 2828_82_S Inverse va | 8  | 0.00557  | 0.238497 | 0.981366 |
| 2828_82_S finngen_R outcome | 2828_82_S Simple mc  | 8  | -0.00287 | 0.540364 | 0.995917 |
| 2828_82_S finngen_R outcome | 2828_82_S Weighted   | 8  | 0.46123  | 0.26012  | 0.119486 |
| 2831_29_k finngen_R outcome | 2831_29_k MR Egger   | 73 | 0.067005 | 0.078849 | 0.3983   |
| 2831_29_k finngen_R outcome | 2831_29_k Weighted   | 73 | 0.07409  | 0.078608 | 0.345924 |
| 2831_29_k finngen_R outcome | 2831_29_k Inverse va | 73 | 0.049768 | 0.046496 | 0.284454 |
| 2831_29_k finngen_R outcome | 2831_29_k Simple mc  | 73 | 0.00966  | 0.129895 | 0.940924 |
| 2831_29_k finngen_R outcome | 2831_29_k Weighted   | 73 | 0.067836 | 0.071193 | 0.343856 |
| 2834_54_k finngen_R outcome | 2834_54_k MR Egger   | 29 | -0.05071 | 0.119325 | 0.674199 |
| 2834_54_k finngen_R outcome | 2834_54_k Weighted   | 29 | 0.053432 | 0.109475 | 0.625496 |
| 2834_54_k finngen_R outcome | 2834_54_k Inverse va | 29 | 0.040481 | 0.084282 | 0.631007 |
| 2834_54_k finngen_R outcome | 2834_54_k Simple mc  | 29 | 0.116349 | 0.217268 | 0.596525 |
| 2834_54_k finngen_R outcome | 2834_54_k Weighted   | 29 | 0.005243 | 0.117412 | 0.964701 |
| 2836_68_L finngen_R outcome | 2836_68_L Inverse va | 2  | -0.13732 | 0.40968  | 0.737475 |
| 2837_3_M finngen_R outcome  | 2837_3_M MR Egger    | 16 | 0.751097 | 0.483451 | 0.142585 |
| 2837_3_M finngen_R outcome  | 2837_3_M Weighted    | 16 | 0.506051 | 0.198466 | 0.010778 |
| 2837_3_M finngen_R outcome  | 2837_3_M Inverse va  | 16 | 0.378523 | 0.149459 | 0.011321 |
| 2837_3_M finngen_R outcome  | 2837_3_M Simple mc   | 16 | 0.428344 | 0.326299 | 0.209003 |
| 2837_3_M finngen_R outcome  | 2837_3_M Weighted    | 16 | 0.535628 | 0.234719 | 0.037506 |
| 2843_13_S finngen_R outcome | 2843_13_S MR Egger   | 79 | 0.124085 | 0.054188 | 0.024766 |
| 2843_13_S finngen_R outcome | 2843_13_S Weighted   | 79 | 0.12659  | 0.052718 | 0.016338 |
| 2843_13_S finngen_R outcome | 2843_13_S Inverse va | 79 | 0.096771 | 0.034244 | 0.004714 |
| 2843_13_S finngen_R outcome | 2843_13_S Simple mc  | 79 | 0.115513 | 0.102417 | 0.262829 |
| 2843_13_S finngen_R outcome | 2843_13_S Weighted   | 79 | 0.115513 | 0.044713 | 0.01165  |
| 2844_53_T finngen_R outcome | 2844_53_T MR Egger   | 26 | -0.03915 | 0.197454 | 0.844501 |
| 2844_53_T finngen_R outcome | 2844_53_T Weighted   | 26 | 0.120062 | 0.12509  | 0.337154 |
| 2844_53_T finngen_R outcome | 2844_53_T Inverse va | 26 | 0.16692  | 0.089253 | 0.061458 |
| 2844_53_T finngen_R outcome | 2844_53_T Simple mc  | 26 | 0.218286 | 0.22481  | 0.340861 |
| 2844_53_T finngen_R outcome | 2844_53_T Weighted   | 26 | 0.100786 | 0.151714 | 0.512571 |
| 2851_63_C finngen_R outcome | 2851_63_C MR Egger   | 11 | 0.149612 | 0.398146 | 0.715791 |
| 2851_63_C finngen_R outcome | 2851_63_C Weighted   | 11 | -0.02285 | 0.219146 | 0.916949 |
| 2851_63_C finngen_R outcome | 2851_63_C Inverse va | 11 | -0.04727 | 0.172237 | 0.783728 |
| 2851_63_C finngen_R outcome | 2851_63_C Simple mc  | 11 | -0.24264 | 0.319453 | 0.465057 |
| 2851_63_C finngen_R outcome | 2851_63_C Weighted   | 11 | -0.03037 | 0.236478 | 0.900345 |
| 2855_49_N finngen_R outcome | 2855_49_N MR Egger   | 17 | 0.1733   | 0.598057 | 0.775958 |
| 2855_49_N finngen_R outcome | 2855_49_N Weighted   | 17 | 0.051701 | 0.211975 | 0.807307 |
| 2855_49_N finngen_R outcome | 2855_49_N Inverse va | 17 | -0.02107 | 0.171597 | 0.902259 |
| 2855_49_N finngen_R outcome | 2855_49_N Simple mc  | 17 | 0.382688 | 0.401962 | 0.355234 |
| 2855_49_N finngen_R outcome | 2855_49_N Weighted   | 17 | 0.199652 | 0.27242  | 0.474231 |
| 2864_2_M finngen_R outcome  | 2864_2_M Inverse va  | 2  | -0.22564 | 1.387199 | 0.870784 |
| 2879_9_SE finngen_R outcome | 2879_9_SE MR Egger   | 21 | -0.15192 | 0.207517 | 0.473054 |
| 2879_9_SE finngen_R outcome | 2879_9_SE Weighted   | 21 | -0.04507 | 0.164355 | 0.783915 |
| 2879_9_SE finngen_R outcome | 2879_9_SE Inverse va | 21 | -0.05187 | 0.110553 | 0.638935 |
| 2879_9_SE finngen_R outcome | 2879_9_SE Simple mc  | 21 | 0.269484 | 0.26156  | 0.315171 |
| 2879_9_SE finngen_R outcome | 2879_9_SE Weighted   | 21 | 0.029376 | 0.177015 | 0.869859 |
| 2888_49_C finngen_R outcome | 2888_49_C MR Egger   | 60 | 0.011752 | 0.103833 | 0.910275 |
| 2888_49_C finngen_R outcome | 2888_49_C Weighted   | 60 | 0.115692 | 0.071051 | 0.103465 |

|                             |                      |    |          |          |          |
|-----------------------------|----------------------|----|----------|----------|----------|
| 2888_49_C finngen_R outcome | 2888_49_C Inverse va | 60 | 0.052807 | 0.0464   | 0.255092 |
| 2888_49_C finngen_R outcome | 2888_49_C Simple mc  | 60 | 0.180191 | 0.137038 | 0.193631 |
| 2888_49_C finngen_R outcome | 2888_49_C Weighted   | 60 | 0.124643 | 0.08276  | 0.137382 |
| 2890_59_C finngen_R outcome | 2890_59_C Inverse va | 2  | 0.272557 | 0.483417 | 0.572881 |
| 2900_53_C finngen_R outcome | 2900_53_C MR Egger   | 37 | -0.00511 | 0.084985 | 0.952399 |
| 2900_53_C finngen_R outcome | 2900_53_C Weighted   | 37 | -0.02671 | 0.080849 | 0.741109 |
| 2900_53_C finngen_R outcome | 2900_53_C Inverse va | 37 | -0.01696 | 0.055959 | 0.761857 |
| 2900_53_C finngen_R outcome | 2900_53_C Simple mc  | 37 | -0.03644 | 0.162264 | 0.823564 |
| 2900_53_C finngen_R outcome | 2900_53_C Weighted   | 37 | 0.008642 | 0.073226 | 0.906715 |
| 2911_27_I finngen_R outcome | 2911_27_I MR Egger   | 4  | -0.65146 | 0.683573 | 0.441162 |
| 2911_27_I finngen_R outcome | 2911_27_I Weighted   | 4  | -0.02946 | 0.421794 | 0.944311 |
| 2911_27_I finngen_R outcome | 2911_27_I Inverse va | 4  | -0.12593 | 0.365835 | 0.730671 |
| 2911_27_I finngen_R outcome | 2911_27_I Simple mc  | 4  | 0.079957 | 0.554558 | 0.894498 |
| 2911_27_I finngen_R outcome | 2911_27_I Weighted   | 4  | -0.07935 | 0.509666 | 0.88617  |
| 2913_1_C finngen_R outcome  | 2913_1_C MR Egger    | 35 | -0.06746 | 0.077824 | 0.392301 |
| 2913_1_C finngen_R outcome  | 2913_1_C Weighted    | 35 | -0.12593 | 0.068005 | 0.064048 |
| 2913_1_C finngen_R outcome  | 2913_1_C Inverse va  | 35 | -0.08184 | 0.049645 | 0.099239 |
| 2913_1_C finngen_R outcome  | 2913_1_C Simple mc   | 35 | -0.23501 | 0.126785 | 0.072495 |
| 2913_1_C finngen_R outcome  | 2913_1_C Weighted    | 35 | -0.13266 | 0.064583 | 0.047721 |
| 2925_9_SE finngen_R outcome | 2925_9_SE MR Egger   | 3  | -3.00118 | 3.169504 | 0.517362 |
| 2925_9_SE finngen_R outcome | 2925_9_SE Weighted   | 3  | 0.467269 | 0.470991 | 0.321149 |
| 2925_9_SE finngen_R outcome | 2925_9_SE Inverse va | 3  | 0.311667 | 0.568266 | 0.583381 |
| 2925_9_SE finngen_R outcome | 2925_9_SE Simple mc  | 3  | 1.001567 | 0.680839 | 0.279097 |
| 2925_9_SE finngen_R outcome | 2925_9_SE Weighted   | 3  | 0.932026 | 0.714336 | 0.321912 |
| 2944_66_I finngen_R outcome | 2944_66_I Wald ratio | 1  | -0.35426 | 0.693583 | 0.609516 |
| 2946_52_C finngen_R outcome | 2946_52_C MR Egger   | 32 | -0.03335 | 0.19414  | 0.864772 |
| 2946_52_C finngen_R outcome | 2946_52_C Weighted   | 32 | -0.10357 | 0.123679 | 0.402356 |
| 2946_52_C finngen_R outcome | 2946_52_C Inverse va | 32 | -0.07436 | 0.088012 | 0.398153 |
| 2946_52_C finngen_R outcome | 2946_52_C Simple mc  | 32 | -0.15355 | 0.202951 | 0.455007 |
| 2946_52_C finngen_R outcome | 2946_52_C Weighted   | 32 | -0.17394 | 0.163551 | 0.295748 |
| 2948_58_C finngen_R outcome | 2948_58_C MR Egger   | 14 | -0.16441 | 0.273199 | 0.558512 |
| 2948_58_C finngen_R outcome | 2948_58_C Weighted   | 14 | -0.11727 | 0.164992 | 0.477248 |
| 2948_58_C finngen_R outcome | 2948_58_C Inverse va | 14 | -0.19243 | 0.121596 | 0.11352  |
| 2948_58_C finngen_R outcome | 2948_58_C Simple mc  | 14 | -0.22333 | 0.261718 | 0.408923 |
| 2948_58_C finngen_R outcome | 2948_58_C Weighted   | 14 | -0.19531 | 0.193877 | 0.332138 |
| 2950_57_I finngen_R outcome | 2950_57_I Wald ratio | 1  | 1.326532 | 0.623788 | 0.033455 |
| 2961_1_PF finngen_R outcome | 2961_1_PF MR Egger   | 15 | -0.06424 | 0.472067 | 0.893845 |
| 2961_1_PF finngen_R outcome | 2961_1_PF Weighted   | 15 | 0.072399 | 0.194135 | 0.7092   |
| 2961_1_PF finngen_R outcome | 2961_1_PF Inverse va | 15 | 0.007858 | 0.157345 | 0.960167 |
| 2961_1_PF finngen_R outcome | 2961_1_PF Simple mc  | 15 | -0.01224 | 0.29624  | 0.967633 |
| 2961_1_PF finngen_R outcome | 2961_1_PF Weighted   | 15 | 0.028881 | 0.198931 | 0.886638 |
| 2962_50_F finngen_R outcome | 2962_50_F MR Egger   | 7  | -0.14146 | 0.542835 | 0.804802 |
| 2962_50_F finngen_R outcome | 2962_50_F Weighted   | 7  | -0.15779 | 0.262396 | 0.547602 |
| 2962_50_F finngen_R outcome | 2962_50_F Inverse va | 7  | 0.029936 | 0.201961 | 0.882163 |
| 2962_50_F finngen_R outcome | 2962_50_F Simple mc  | 7  | -0.15847 | 0.461102 | 0.742806 |
| 2962_50_F finngen_R outcome | 2962_50_F Weighted   | 7  | -0.30081 | 0.339048 | 0.40911  |
| 2966_65_C finngen_R outcome | 2966_65_C MR Egger   | 17 | 0.044984 | 0.146479 | 0.762988 |
| 2966_65_C finngen_R outcome | 2966_65_C Weighted   | 17 | -0.00817 | 0.106777 | 0.939029 |
| 2966_65_C finngen_R outcome | 2966_65_C Inverse va | 17 | 0.033864 | 0.107696 | 0.753189 |
| 2966_65_C finngen_R outcome | 2966_65_C Simple mc  | 17 | 0.292768 | 0.266579 | 0.288352 |
| 2966_65_C finngen_R outcome | 2966_65_C Weighted   | 17 | -0.00844 | 0.102335 | 0.935309 |
| 2968_61_T finngen_R outcome | 2968_61_T Wald ratio | 1  | -0.29128 | 0.785804 | 0.710879 |
| 2972_57_E finngen_R outcome | 2972_57_E Wald ratio | 1  | 0.312896 | 0.637471 | 0.62354  |
| 2973_15_C finngen_R outcome | 2973_15_C MR Egger   | 20 | -0.25519 | 0.204387 | 0.227821 |
| 2973_15_C finngen_R outcome | 2973_15_C Weighted   | 20 | -0.07299 | 0.12887  | 0.571112 |
| 2973_15_C finngen_R outcome | 2973_15_C Inverse va | 20 | 0.005994 | 0.098347 | 0.951401 |
| 2973_15_C finngen_R outcome | 2973_15_C Simple mc  | 20 | -0.07987 | 0.204659 | 0.700678 |
| 2973_15_C finngen_R outcome | 2973_15_C Weighted   | 20 | -0.07987 | 0.13618  | 0.564432 |



|                               |                        |     |          |          |          |
|-------------------------------|------------------------|-----|----------|----------|----------|
| 2974_61_C finngen_R outcome   | 2974_61_C MR Egger     | 49  | -0.42714 | 0.158642 | 0.009796 |
| 2974_61_C finngen_R outcome   | 2974_61_C Weighted     | 49  | -0.2158  | 0.091033 | 0.017758 |
| 2974_61_C finngen_R outcome   | 2974_61_C Inverse va   | 49  | -0.08225 | 0.078575 | 0.295228 |
| 2974_61_C finngen_R outcome   | 2974_61_C Simple mc    | 49  | -0.15159 | 0.206203 | 0.465828 |
| 2974_61_C finngen_R outcome   | 2974_61_C Weighted     | 49  | -0.27212 | 0.096739 | 0.007093 |
| 2977_7_EC finngen_R outcome   | 2977_7_EC MR Egger     | 41  | 0.023952 | 0.090671 | 0.793043 |
| 2977_7_EC finngen_R outcome   | 2977_7_EC Weighted     | 41  | 0.054976 | 0.086712 | 0.526075 |
| 2977_7_EC finngen_R outcome   | 2977_7_EC Inverse va   | 41  | 0.011645 | 0.062598 | 0.85242  |
| 2977_7_EC finngen_R outcome   | 2977_7_EC Simple mc    | 41  | -0.00588 | 0.170969 | 0.97273  |
| 2977_7_EC finngen_R outcome   | 2977_7_EC Weighted     | 41  | -0.00588 | 0.08461  | 0.944931 |
| 2979_8_C> finngen_R outcome   | 2979_8_C> MR Egger     | 6   | 0.147962 | 0.460971 | 0.764297 |
| 2979_8_C> finngen_R outcome   | 2979_8_C> Weighted     | 6   | -0.2136  | 0.241715 | 0.376875 |
| 2979_8_C> finngen_R outcome   | 2979_8_C> Inverse va   | 6   | -0.18709 | 0.210938 | 0.375113 |
| 2979_8_C> finngen_R outcome   | 2979_8_C> Simple mc    | 6   | -0.54753 | 0.396108 | 0.225446 |
| 2979_8_C> finngen_R outcome   | 2979_8_C> Weighted     | 6   | -0.17961 | 0.266755 | 0.530605 |
| 2985_35_C finngen_R outcome   | 2985_35_C MR Egger     | 74  | -0.0489  | 0.049742 | 0.328838 |
| 2985_35_C finngen_R outcome   | 2985_35_C Weighted     | 74  | -0.04819 | 0.052314 | 0.356949 |
| 2985_35_C finngen_R outcome   | 2985_35_C Inverse va   | 74  | -0.01142 | 0.035854 | 0.75     |
| 2985_35_C finngen_R outcome   | 2985_35_C Simple mc    | 74  | -0.02052 | 0.09765  | 0.834114 |
| 2985_35_C finngen_R outcome   | 2985_35_C Weighted     | 74  | -0.04512 | 0.044807 | 0.317296 |
| 2991_9_IL: finngen_R outcome  | 2991_9_IL: MR Egger    | 27  | -0.22522 | 0.200781 | 0.272644 |
| 2991_9_IL: finngen_R outcome  | 2991_9_IL: Weighted    | 27  | -0.08112 | 0.130129 | 0.533011 |
| 2991_9_IL: finngen_R outcome  | 2991_9_IL: Inverse va  | 27  | 0.064236 | 0.092088 | 0.485455 |
| 2991_9_IL: finngen_R outcome  | 2991_9_IL: Simple mc   | 27  | -0.04591 | 0.202911 | 0.822774 |
| 2991_9_IL: finngen_R outcome  | 2991_9_IL: Weighted    | 27  | -0.04591 | 0.141326 | 0.747897 |
| 2992_59_II finngen_R outcome  | 2992_59_II MR Egger    | 157 | -0.00821 | 0.032892 | 0.803224 |
| 2992_59_II finngen_R outcome  | 2992_59_II Weighted    | 157 | 0.01112  | 0.030729 | 0.717451 |
| 2992_59_II finngen_R outcome  | 2992_59_II Inverse va  | 157 | 0.004327 | 0.019963 | 0.828413 |
| 2992_59_II finngen_R outcome  | 2992_59_II Simple mc   | 157 | -0.02003 | 0.060938 | 0.74286  |
| 2992_59_II finngen_R outcome  | 2992_59_II Weighted    | 157 | -0.00242 | 0.028564 | 0.932524 |
| 2993_1_IL: finngen_R outcome  | 2993_1_IL: Inverse va  | 2   | -0.01693 | 0.394508 | 0.965777 |
| 2994_71_II finngen_R outcome  | 2994_71_II MR Egger    | 16  | -0.42416 | 0.281036 | 0.15346  |
| 2994_71_II finngen_R outcome  | 2994_71_II Weighted    | 16  | -0.28346 | 0.154805 | 0.067093 |
| 2994_71_II finngen_R outcome  | 2994_71_II Inverse va  | 16  | -0.40635 | 0.129382 | 0.001685 |
| 2994_71_II finngen_R outcome  | 2994_71_II Simple mc   | 16  | -0.63503 | 0.242949 | 0.019552 |
| 2994_71_II finngen_R outcome  | 2994_71_II Weighted    | 16  | -0.31795 | 0.151587 | 0.053311 |
| 3000_66_III finngen_R outcome | 3000_66_III MR Egger   | 153 | -0.00299 | 0.035975 | 0.933806 |
| 3000_66_III finngen_R outcome | 3000_66_III Weighted   | 153 | -0.00381 | 0.036628 | 0.917093 |
| 3000_66_III finngen_R outcome | 3000_66_III Inverse va | 153 | 0.011479 | 0.021933 | 0.600715 |
| 3000_66_III finngen_R outcome | 3000_66_III Simple mc  | 153 | -0.04684 | 0.066223 | 0.480448 |
| 3000_66_III finngen_R outcome | 3000_66_III Weighted   | 153 | -0.00405 | 0.032339 | 0.900593 |
| 3004_67_F finngen_R outcome   | 3004_67_F MR Egger     | 46  | 0.139456 | 0.114957 | 0.231558 |
| 3004_67_F finngen_R outcome   | 3004_67_F Weighted     | 46  | 0.17133  | 0.09455  | 0.069977 |
| 3004_67_F finngen_R outcome   | 3004_67_F Inverse va   | 46  | 0.192759 | 0.059596 | 0.001219 |
| 3004_67_F finngen_R outcome   | 3004_67_F Simple mc    | 46  | 0.338411 | 0.170918 | 0.053843 |
| 3004_67_F finngen_R outcome   | 3004_67_F Weighted     | 46  | 0.168676 | 0.094518 | 0.081072 |
| 3007_7_SII finngen_R outcome  | 3007_7_SII MR Egger    | 179 | 0.00899  | 0.030081 | 0.765391 |
| 3007_7_SII finngen_R outcome  | 3007_7_SII Weighted    | 179 | 0.033416 | 0.032461 | 0.303278 |
| 3007_7_SII finngen_R outcome  | 3007_7_SII Inverse va  | 179 | 0.008505 | 0.018488 | 0.645509 |
| 3007_7_SII finngen_R outcome  | 3007_7_SII Simple mc   | 179 | 0.046647 | 0.062373 | 0.455523 |
| 3007_7_SII finngen_R outcome  | 3007_7_SII Weighted    | 179 | 0.039143 | 0.029772 | 0.190275 |
| 3009_3_TC finngen_R outcome   | 3009_3_TC MR Egger     | 8   | -0.35322 | 0.612    | 0.584826 |
| 3009_3_TC finngen_R outcome   | 3009_3_TC Weighted     | 8   | -0.03171 | 0.230184 | 0.890437 |
| 3009_3_TC finngen_R outcome   | 3009_3_TC Inverse va   | 8   | -0.09583 | 0.184904 | 0.604278 |
| 3009_3_TC finngen_R outcome   | 3009_3_TC Simple mc    | 8   | 0.045202 | 0.381398 | 0.908987 |
| 3009_3_TC finngen_R outcome   | 3009_3_TC Weighted     | 8   | 0.112261 | 0.304068 | 0.722894 |
| 3024_18_S finngen_R outcome   | 3024_18_S MR Egger     | 17  | -0.23968 | 0.329584 | 0.478295 |
| 3024_18_S finngen_R outcome   | 3024_18_S Weighted     | 17  | 0.128388 | 0.184428 | 0.486341 |

|                            |                      |    |          |          |          |
|----------------------------|----------------------|----|----------|----------|----------|
| 3024_18_§finngen_R outcome | 3024_18_§Inverse va  | 17 | 0.196444 | 0.143258 | 0.170294 |
| 3024_18_§finngen_R outcome | 3024_18_§Simple mc   | 17 | 0.270257 | 0.307972 | 0.39318  |
| 3024_18_§finngen_R outcome | 3024_18_§Weighted    | 17 | 0.06847  | 0.195332 | 0.730512 |
| 3025_50_Ffinngen_R outcome | 3025_50_FMR Egger    | 81 | 0.154802 | 0.082161 | 0.063228 |
| 3025_50_Ffinngen_R outcome | 3025_50_FWeighted    | 81 | 0.132407 | 0.073417 | 0.071311 |
| 3025_50_Ffinngen_R outcome | 3025_50_FInverse va  | 81 | 0.122723 | 0.045543 | 0.007047 |
| 3025_50_Ffinngen_R outcome | 3025_50_FSimple mc   | 81 | 0.214343 | 0.137793 | 0.123765 |
| 3025_50_Ffinngen_R outcome | 3025_50_FWeighted    | 81 | 0.147873 | 0.063209 | 0.021808 |
| 3028_36_Cfinngen_R outcome | 3028_36_CMR Egger    | 48 | -0.00134 | 0.052067 | 0.979579 |
| 3028_36_Cfinngen_R outcome | 3028_36_CWeighted    | 48 | -0.06347 | 0.050886 | 0.212288 |
| 3028_36_Cfinngen_R outcome | 3028_36_CInverse va  | 48 | -0.06022 | 0.037511 | 0.108397 |
| 3028_36_Cfinngen_R outcome | 3028_36_CSimple mc   | 48 | -0.13352 | 0.110299 | 0.232125 |
| 3028_36_Cfinngen_R outcome | 3028_36_CWeighted    | 48 | -0.06041 | 0.039404 | 0.131931 |
| 3029_52_Cfinngen_R outcome | 3029_52_CMR Egger    | 33 | 0.011088 | 0.099285 | 0.9118   |
| 3029_52_Cfinngen_R outcome | 3029_52_CWeighted    | 33 | 0.019088 | 0.083384 | 0.818934 |
| 3029_52_Cfinngen_R outcome | 3029_52_CInverse va  | 33 | 0.058747 | 0.059319 | 0.321994 |
| 3029_52_Cfinngen_R outcome | 3029_52_CSimple mc   | 33 | 0.058154 | 0.157022 | 0.713557 |
| 3029_52_Cfinngen_R outcome | 3029_52_CWeighted    | 33 | 0.015537 | 0.068581 | 0.82222  |
| 3038_9_C)finngen_R outcome | 3038_9_C)MR Egger    | 45 | -0.1787  | 0.130797 | 0.178976 |
| 3038_9_C)finngen_R outcome | 3038_9_C)Weighted    | 45 | 0.001532 | 0.098773 | 0.987626 |
| 3038_9_C)finngen_R outcome | 3038_9_C)Inverse va  | 45 | 0.011374 | 0.069014 | 0.869093 |
| 3038_9_C)finngen_R outcome | 3038_9_C)Simple mc   | 45 | 0.214852 | 0.193032 | 0.271737 |
| 3038_9_C)finngen_R outcome | 3038_9_C)Weighted    | 45 | 0.004046 | 0.089729 | 0.964242 |
| 3040_59_Cfinngen_R outcome | 3040_59_CMR Egger    | 10 | -0.05732 | 0.117164 | 0.637832 |
| 3040_59_Cfinngen_R outcome | 3040_59_CWeighted    | 10 | -0.03784 | 0.098021 | 0.699504 |
| 3040_59_Cfinngen_R outcome | 3040_59_CInverse va  | 10 | -0.05786 | 0.076935 | 0.452007 |
| 3040_59_Cfinngen_R outcome | 3040_59_CSimple mc   | 10 | -0.30015 | 0.174937 | 0.120344 |
| 3040_59_Cfinngen_R outcome | 3040_59_CWeighted    | 10 | 0.02091  | 0.098703 | 0.836946 |
| 3041_55_Μfinngen_R outcome | 3041_55_ΜMR Egger    | 20 | -0.17318 | 0.180366 | 0.349705 |
| 3041_55_Μfinngen_R outcome | 3041_55_ΜWeighted    | 20 | -0.01895 | 0.141537 | 0.893476 |
| 3041_55_Μfinngen_R outcome | 3041_55_ΜInverse va  | 20 | -0.13121 | 0.101886 | 0.197825 |
| 3041_55_Μfinngen_R outcome | 3041_55_ΜSimple mc   | 20 | 0.002367 | 0.237917 | 0.992165 |
| 3041_55_Μfinngen_R outcome | 3041_55_ΜWeighted    | 20 | 0.021468 | 0.196329 | 0.914073 |
| 3043_49_§finngen_R outcome | 3043_49_§Wald ratio  | 1  | 1.236276 | 1.396476 | 0.376004 |
| 3044_3_Cfinngen_R outcome  | 3044_3_C)MR Egger    | 49 | -0.00854 | 0.055314 | 0.877932 |
| 3044_3_Cfinngen_R outcome  | 3044_3_C)Weighted    | 49 | 0.010153 | 0.05486  | 0.853169 |
| 3044_3_Cfinngen_R outcome  | 3044_3_C)Inverse va  | 49 | -0.00901 | 0.040462 | 0.823737 |
| 3044_3_Cfinngen_R outcome  | 3044_3_C)Simple mc   | 49 | -0.03659 | 0.11012  | 0.741152 |
| 3044_3_Cfinngen_R outcome  | 3044_3_C)Weighted    | 49 | -0.00478 | 0.047273 | 0.919819 |
| 3045_72_Ffinngen_R outcome | 3045_72_FMR Egger    | 22 | -0.01985 | 0.231325 | 0.93248  |
| 3045_72_Ffinngen_R outcome | 3045_72_FWeighted    | 22 | 0.023552 | 0.156509 | 0.880386 |
| 3045_72_Ffinngen_R outcome | 3045_72_FInverse va  | 22 | -0.06908 | 0.110999 | 0.533725 |
| 3045_72_Ffinngen_R outcome | 3045_72_FSimple mc   | 22 | 0.097618 | 0.268626 | 0.719941 |
| 3045_72_Ffinngen_R outcome | 3045_72_FWeighted    | 22 | 0.030166 | 0.158975 | 0.851327 |
| 3046_31_Ffinngen_R outcome | 3046_31_FMR Egger    | 50 | -0.17822 | 0.109826 | 0.111204 |
| 3046_31_Ffinngen_R outcome | 3046_31_FWeighted    | 50 | -0.1738  | 0.086684 | 0.044961 |
| 3046_31_Ffinngen_R outcome | 3046_31_FInverse va  | 50 | -0.10367 | 0.06183  | 0.093614 |
| 3046_31_Ffinngen_R outcome | 3046_31_FSimple mc   | 50 | -0.21923 | 0.15207  | 0.155757 |
| 3046_31_Ffinngen_R outcome | 3046_31_FWeighted    | 50 | -0.16986 | 0.110422 | 0.130405 |
| 3049_61_Ffinngen_R outcome | 3049_61_FWald ratio  | 1  | 0.222267 | 0.718141 | 0.756939 |
| 3050_7_∨finngen_R outcome  | 3050_7_∨MR Egger     | 7  | 0.285291 | 0.433936 | 0.539947 |
| 3050_7_∨finngen_R outcome  | 3050_7_∨Weighted     | 7  | 0.077815 | 0.214795 | 0.717147 |
| 3050_7_∨finngen_R outcome  | 3050_7_∨Inverse va   | 7  | -0.0094  | 0.178492 | 0.957984 |
| 3050_7_∨finngen_R outcome  | 3050_7_∨Simple mc    | 7  | 0.036116 | 0.279787 | 0.90151  |
| 3050_7_∨finngen_R outcome  | 3050_7_∨Weighted     | 7  | 0.075627 | 0.25442  | 0.776297 |
| 3054_3_HIfinngen_R outcome | 3054_3_HI)MR Egger   | 81 | 0.026454 | 0.046846 | 0.573874 |
| 3054_3_HIfinngen_R outcome | 3054_3_HI)Weighted   | 81 | -0.00484 | 0.039894 | 0.903348 |
| 3054_3_HIfinngen_R outcome | 3054_3_HI)Inverse va | 81 | -0.00687 | 0.025963 | 0.791243 |

|                             |                      |     |          |          |          |
|-----------------------------|----------------------|-----|----------|----------|----------|
| 3054_3_HI finngen_R outcome | 3054_3_HI Simple mc  | 81  | 0.004011 | 0.067476 | 0.952744 |
| 3054_3_HI finngen_R outcome | 3054_3_HI Weighted   | 81  | 0.004011 | 0.044595 | 0.928552 |
| 3059_50_T finngen_R outcome | 3059_50_T MR Egger   | 3   | 1.333659 | 0.841723 | 0.358417 |
| 3059_50_T finngen_R outcome | 3059_50_T Weighted   | 3   | -0.96193 | 0.480877 | 0.04546  |
| 3059_50_T finngen_R outcome | 3059_50_T Inverse va | 3   | -0.62663 | 0.685617 | 0.360733 |
| 3059_50_T finngen_R outcome | 3059_50_T Simple mc  | 3   | -1.41197 | 0.819807 | 0.227153 |
| 3059_50_T finngen_R outcome | 3059_50_T Weighted   | 3   | -1.45281 | 1.059089 | 0.30375  |
| 3060_43_C finngen_R outcome | 3060_43_C MR Egger   | 19  | -0.03493 | 0.166944 | 0.836756 |
| 3060_43_C finngen_R outcome | 3060_43_C Weighted   | 19  | -0.01821 | 0.141011 | 0.897256 |
| 3060_43_C finngen_R outcome | 3060_43_C Inverse va | 19  | 0.020067 | 0.098285 | 0.838216 |
| 3060_43_C finngen_R outcome | 3060_43_C Simple mc  | 19  | -0.09161 | 0.234062 | 0.700106 |
| 3060_43_C finngen_R outcome | 3060_43_C Weighted   | 19  | -0.08667 | 0.179605 | 0.635218 |
| 3066_12_L finngen_R outcome | 3066_12_L MR Egger   | 23  | 0.031697 | 0.149494 | 0.834131 |
| 3066_12_L finngen_R outcome | 3066_12_L Weighted   | 23  | 0.010966 | 0.113025 | 0.922711 |
| 3066_12_L finngen_R outcome | 3066_12_L Inverse va | 23  | -0.00853 | 0.089504 | 0.924114 |
| 3066_12_L finngen_R outcome | 3066_12_L Simple mc  | 23  | -0.19563 | 0.194203 | 0.324726 |
| 3066_12_L finngen_R outcome | 3066_12_L Weighted   | 23  | 0.019531 | 0.109283 | 0.859797 |
| 3074_6_LE finngen_R outcome | 3074_6_LE MR Egger   | 80  | -0.00055 | 0.052646 | 0.991662 |
| 3074_6_LE finngen_R outcome | 3074_6_LE Weighted   | 80  | 0.003172 | 0.046001 | 0.945027 |
| 3074_6_LE finngen_R outcome | 3074_6_LE Inverse va | 80  | 0.000149 | 0.031799 | 0.996269 |
| 3074_6_LE finngen_R outcome | 3074_6_LE Simple mc  | 80  | 0.041769 | 0.086887 | 0.632036 |
| 3074_6_LE finngen_R outcome | 3074_6_LE Weighted   | 80  | -0.01188 | 0.047977 | 0.805112 |
| 3077_66_F finngen_R outcome | 3077_66_F MR Egger   | 15  | 0.262001 | 0.2805   | 0.367303 |
| 3077_66_F finngen_R outcome | 3077_66_F Weighted   | 15  | 0.126776 | 0.194359 | 0.514222 |
| 3077_66_F finngen_R outcome | 3077_66_F Inverse va | 15  | 0.159382 | 0.141174 | 0.258909 |
| 3077_66_F finngen_R outcome | 3077_66_F Simple mc  | 15  | 0.205895 | 0.293561 | 0.494566 |
| 3077_66_F finngen_R outcome | 3077_66_F Weighted   | 15  | 0.185825 | 0.207858 | 0.386433 |
| 3132_1_VE finngen_R outcome | 3132_1_VE Wald ratio | 1   | 0.015375 | 0.184937 | 0.933745 |
| 3143_3_CI finngen_R outcome | 3143_3_CI Wald ratio | 1   | 0.075238 | 0.706007 | 0.915131 |
| 3151_6_IL finngen_R outcome | 3151_6_IL Wald ratio | 1   | 0.717015 | 0.643978 | 0.26553  |
| 3152_57_T finngen_R outcome | 3152_57_T MR Egger   | 6   | 0.606167 | 0.35053  | 0.158815 |
| 3152_57_T finngen_R outcome | 3152_57_T Weighted   | 6   | 0.487549 | 0.268705 | 0.069611 |
| 3152_57_T finngen_R outcome | 3152_57_T Inverse va | 6   | 0.393349 | 0.212691 | 0.064401 |
| 3152_57_T finngen_R outcome | 3152_57_T Simple mc  | 6   | 0.692064 | 0.364535 | 0.116089 |
| 3152_57_T finngen_R outcome | 3152_57_T Weighted   | 6   | 0.453398 | 0.344508 | 0.245253 |
| 3166_92_C finngen_R outcome | 3166_92_C MR Egger   | 182 | -0.10196 | 0.033918 | 0.003024 |
| 3166_92_C finngen_R outcome | 3166_92_C Weighted   | 182 | -0.04888 | 0.032935 | 0.137812 |
| 3166_92_C finngen_R outcome | 3166_92_C Inverse va | 182 | -0.05107 | 0.020622 | 0.013273 |
| 3166_92_C finngen_R outcome | 3166_92_C Simple mc  | 182 | -0.08076 | 0.067409 | 0.23244  |
| 3166_92_C finngen_R outcome | 3166_92_C Weighted   | 182 | -0.07408 | 0.031901 | 0.021341 |
| 3168_8_AI finngen_R outcome | 3168_8_AI MR Egger   | 20  | -0.11934 | 0.140971 | 0.408349 |
| 3168_8_AI finngen_R outcome | 3168_8_AI Weighted   | 20  | -0.0163  | 0.11569  | 0.887978 |
| 3168_8_AI finngen_R outcome | 3168_8_AI Inverse va | 20  | -0.0876  | 0.084975 | 0.302588 |
| 3168_8_AI finngen_R outcome | 3168_8_AI Simple mc  | 20  | -0.03468 | 0.226763 | 0.880047 |
| 3168_8_AI finngen_R outcome | 3168_8_AI Weighted   | 20  | 0.020652 | 0.131152 | 0.876538 |
| 3171_57_f finngen_R outcome | 3171_57_f Inverse va | 2   | 0.194948 | 0.380691 | 0.608588 |
| 3173_49_f finngen_R outcome | 3173_49_f MR Egger   | 89  | -0.06897 | 0.047012 | 0.145972 |
| 3173_49_f finngen_R outcome | 3173_49_f Weighted   | 89  | -0.04648 | 0.05192  | 0.370702 |
| 3173_49_f finngen_R outcome | 3173_49_f Inverse va | 89  | -0.01925 | 0.029346 | 0.511857 |
| 3173_49_f finngen_R outcome | 3173_49_f Simple mc  | 89  | 0.015124 | 0.107195 | 0.888119 |
| 3173_49_f finngen_R outcome | 3173_49_f Weighted   | 89  | -0.04136 | 0.047519 | 0.386422 |
| 3175_51_f finngen_R outcome | 3175_51_f MR Egger   | 139 | -0.09966 | 0.049197 | 0.044724 |
| 3175_51_f finngen_R outcome | 3175_51_f Weighted   | 139 | -0.08542 | 0.05107  | 0.094393 |
| 3175_51_f finngen_R outcome | 3175_51_f Inverse va | 139 | -0.05685 | 0.030342 | 0.060995 |
| 3175_51_f finngen_R outcome | 3175_51_f Simple mc  | 139 | -0.0446  | 0.113906 | 0.695972 |
| 3175_51_f finngen_R outcome | 3175_51_f Weighted   | 139 | -0.10117 | 0.052095 | 0.054161 |
| 3181_50_C finngen_R outcome | 3181_50_C MR Egger   | 34  | -0.09822 | 0.111368 | 0.384386 |
| 3181_50_C finngen_R outcome | 3181_50_C Weighted   | 34  | -0.04365 | 0.080655 | 0.58837  |

|                             |                      |    |          |          |          |
|-----------------------------|----------------------|----|----------|----------|----------|
| 3181_50_C finngen_R outcome | 3181_50_C Inverse va | 34 | -0.01377 | 0.059332 | 0.816513 |
| 3181_50_C finngen_R outcome | 3181_50_C Simple mc  | 34 | 0.006295 | 0.126611 | 0.960646 |
| 3181_50_C finngen_R outcome | 3181_50_C Weighted   | 34 | -0.05071 | 0.082123 | 0.54117  |
| 3184_25_F finngen_R outcome | 3184_25_F MR Egger   | 97 | 0.059972 | 0.042507 | 0.161544 |
| 3184_25_F finngen_R outcome | 3184_25_F Weighted   | 97 | 0.044465 | 0.044193 | 0.314336 |
| 3184_25_F finngen_R outcome | 3184_25_F Inverse va | 97 | 0.082391 | 0.027057 | 0.002326 |
| 3184_25_F finngen_R outcome | 3184_25_F Simple mc  | 97 | 0.17413  | 0.071091 | 0.016122 |
| 3184_25_F finngen_R outcome | 3184_25_F Weighted   | 97 | 0.077321 | 0.037512 | 0.041986 |
| 3191_50_V finngen_R outcome | 3191_50_V MR Egger   | 8  | -0.08237 | 0.502936 | 0.875276 |
| 3191_50_V finngen_R outcome | 3191_50_V Weighted   | 8  | 0.033441 | 0.203681 | 0.869586 |
| 3191_50_V finngen_R outcome | 3191_50_V Inverse va | 8  | 0.093972 | 0.168633 | 0.577351 |
| 3191_50_V finngen_R outcome | 3191_50_V Simple mc  | 8  | 0.113333 | 0.301649 | 0.718259 |
| 3191_50_V finngen_R outcome | 3191_50_V Weighted   | 8  | -0.01727 | 0.221933 | 0.940142 |
| 3195_50_C finngen_R outcome | 3195_50_C MR Egger   | 90 | 0.049589 | 0.048305 | 0.307432 |
| 3195_50_C finngen_R outcome | 3195_50_C Weighted   | 90 | 0.086494 | 0.050648 | 0.087686 |
| 3195_50_C finngen_R outcome | 3195_50_C Inverse va | 90 | 0.011577 | 0.031145 | 0.710093 |
| 3195_50_C finngen_R outcome | 3195_50_C Simple mc  | 90 | -0.00905 | 0.094579 | 0.923979 |
| 3195_50_C finngen_R outcome | 3195_50_C Weighted   | 90 | 0.058755 | 0.042243 | 0.167724 |
| 3196_6_H finngen_R outcome  | 3196_6_H MR Egger    | 12 | -0.1913  | 0.503687 | 0.712041 |
| 3196_6_H finngen_R outcome  | 3196_6_H Weighted    | 12 | 0.06245  | 0.216964 | 0.773471 |
| 3196_6_H finngen_R outcome  | 3196_6_H Inverse va  | 12 | 0.150503 | 0.170193 | 0.37653  |
| 3196_6_H finngen_R outcome  | 3196_6_H Simple mc   | 12 | 0.056744 | 0.307469 | 0.856938 |
| 3196_6_H finngen_R outcome  | 3196_6_H Weighted    | 12 | -0.00688 | 0.268367 | 0.980003 |
| 3199_54_K finngen_R outcome | 3199_54_K Inverse va | 2  | 0.497495 | 0.229866 | 0.030442 |
| 3210_1_M finngen_R outcome  | 3210_1_M Wald ratio  | 1  | -1.1847  | 0.53291  | 0.02621  |
| 3213_65_I finngen_R outcome | 3213_65_I MR Egger   | 20 | 0.140461 | 0.218269 | 0.528    |
| 3213_65_I finngen_R outcome | 3213_65_I Weighted   | 20 | -0.14155 | 0.170179 | 0.405539 |
| 3213_65_I finngen_R outcome | 3213_65_I Inverse va | 20 | -0.18112 | 0.137404 | 0.187458 |
| 3213_65_I finngen_R outcome | 3213_65_I Simple mc  | 20 | -0.11694 | 0.404361 | 0.775565 |
| 3213_65_I finngen_R outcome | 3213_65_I Weighted   | 20 | 0.027687 | 0.163257 | 0.867126 |
| 3216_2_PI finngen_R outcome | 3216_2_PI MR Egger   | 4  | -0.10995 | 0.916108 | 0.915436 |
| 3216_2_PI finngen_R outcome | 3216_2_PI Weighted   | 4  | -0.08829 | 0.197539 | 0.654895 |
| 3216_2_PI finngen_R outcome | 3216_2_PI Inverse va | 4  | -0.05539 | 0.186027 | 0.765875 |
| 3216_2_PI finngen_R outcome | 3216_2_PI Simple mc  | 4  | -0.07265 | 0.285239 | 0.815419 |
| 3216_2_PI finngen_R outcome | 3216_2_PI Weighted   | 4  | -0.11415 | 0.231836 | 0.656226 |
| 3220_40_F finngen_R outcome | 3220_40_F MR Egger   | 48 | 0.242329 | 0.090544 | 0.010278 |
| 3220_40_F finngen_R outcome | 3220_40_F Weighted   | 48 | 0.142397 | 0.072465 | 0.049408 |
| 3220_40_F finngen_R outcome | 3220_40_F Inverse va | 48 | 0.104763 | 0.047165 | 0.026336 |
| 3220_40_F finngen_R outcome | 3220_40_F Simple mc  | 48 | 0.118439 | 0.111288 | 0.292652 |
| 3220_40_F finngen_R outcome | 3220_40_F Weighted   | 48 | 0.154307 | 0.069664 | 0.031642 |
| 3221_54_S finngen_R outcome | 3221_54_S MR Egger   | 27 | 0.059913 | 0.260057 | 0.819668 |
| 3221_54_S finngen_R outcome | 3221_54_S Weighted   | 27 | 0.106254 | 0.148098 | 0.473092 |
| 3221_54_S finngen_R outcome | 3221_54_S Inverse va | 27 | 0.123199 | 0.094289 | 0.191344 |
| 3221_54_S finngen_R outcome | 3221_54_S Simple mc  | 27 | -0.07329 | 0.270981 | 0.788953 |
| 3221_54_S finngen_R outcome | 3221_54_S Weighted   | 27 | -0.0282  | 0.197825 | 0.887736 |
| 3232_28_F finngen_R outcome | 3232_28_F MR Egger   | 17 | -0.27991 | 0.190025 | 0.161421 |
| 3232_28_F finngen_R outcome | 3232_28_F Weighted   | 17 | -0.21374 | 0.105284 | 0.042348 |
| 3232_28_F finngen_R outcome | 3232_28_F Inverse va | 17 | -0.18931 | 0.084793 | 0.025577 |
| 3232_28_F finngen_R outcome | 3232_28_F Simple mc  | 17 | -0.30724 | 0.160408 | 0.073492 |
| 3232_28_F finngen_R outcome | 3232_28_F Weighted   | 17 | -0.22874 | 0.11847  | 0.07143  |
| 3234_23_C finngen_R outcome | 3234_23_C MR Egger   | 5  | 0.050127 | 1.131647 | 0.967452 |
| 3234_23_C finngen_R outcome | 3234_23_C Weighted   | 5  | 0.697673 | 0.297571 | 0.01905  |
| 3234_23_C finngen_R outcome | 3234_23_C Inverse va | 5  | 0.550441 | 0.250456 | 0.027967 |
| 3234_23_C finngen_R outcome | 3234_23_C Simple mc  | 5  | 0.618855 | 0.39564  | 0.19282  |
| 3234_23_C finngen_R outcome | 3234_23_C Weighted   | 5  | 0.677624 | 0.326026 | 0.10621  |
| 3235_50_V finngen_R outcome | 3235_50_V MR Egger   | 72 | 0.179533 | 0.065993 | 0.008216 |
| 3235_50_V finngen_R outcome | 3235_50_V Weighted   | 72 | 0.137247 | 0.066934 | 0.040316 |
| 3235_50_V finngen_R outcome | 3235_50_V Inverse va | 72 | 0.046883 | 0.042698 | 0.2722   |

|                             |                      |     |          |          |          |
|-----------------------------|----------------------|-----|----------|----------|----------|
| 3235_50_v finngen_R outcome | 3235_50_v Simple mc  | 72  | 0.037648 | 0.113664 | 0.74145  |
| 3235_50_v finngen_R outcome | 3235_50_v Weighted   | 72  | 0.12806  | 0.057603 | 0.029389 |
| 3280_49_f finngen_R outcome | 3280_49_f MR Egger   | 3   | -1.00637 | 0.685182 | 0.380543 |
| 3280_49_f finngen_R outcome | 3280_49_f Weighted   | 3   | -0.69866 | 0.306846 | 0.022792 |
| 3280_49_f finngen_R outcome | 3280_49_f Inverse va | 3   | -0.62496 | 0.288757 | 0.030441 |
| 3280_49_f finngen_R outcome | 3280_49_f Simple mc  | 3   | -0.71937 | 0.41709  | 0.226716 |
| 3280_49_f finngen_R outcome | 3280_49_f Weighted   | 3   | -0.70642 | 0.364987 | 0.192576 |
| 3283_21_T finngen_R outcome | 3283_21_T MR Egger   | 74  | 0.051521 | 0.074193 | 0.489656 |
| 3283_21_T finngen_R outcome | 3283_21_T Weighted   | 74  | -0.00168 | 0.061423 | 0.978241 |
| 3283_21_T finngen_R outcome | 3283_21_T Inverse va | 74  | -0.01979 | 0.041776 | 0.635709 |
| 3283_21_T finngen_R outcome | 3283_21_T Simple mc  | 74  | -0.06038 | 0.134249 | 0.654198 |
| 3283_21_T finngen_R outcome | 3283_21_T Weighted   | 74  | 0.022726 | 0.061229 | 0.711594 |
| 3285_23_C finngen_R outcome | 3285_23_C MR Egger   | 4   | 0.054982 | 0.756794 | 0.948696 |
| 3285_23_C finngen_R outcome | 3285_23_C Weighted   | 4   | 0.377252 | 0.374595 | 0.31389  |
| 3285_23_C finngen_R outcome | 3285_23_C Inverse va | 4   | 0.243094 | 0.352511 | 0.490442 |
| 3285_23_C finngen_R outcome | 3285_23_C Simple mc  | 4   | 0.511922 | 0.501096 | 0.382165 |
| 3285_23_C finngen_R outcome | 3285_23_C Weighted   | 4   | 0.359221 | 0.440488 | 0.474509 |
| 3290_50_C finngen_R outcome | 3290_50_C MR Egger   | 97  | 0.001599 | 0.060672 | 0.979035 |
| 3290_50_C finngen_R outcome | 3290_50_C Weighted   | 97  | 0.003059 | 0.051113 | 0.952283 |
| 3290_50_C finngen_R outcome | 3290_50_C Inverse va | 97  | 0.007902 | 0.033282 | 0.812322 |
| 3290_50_C finngen_R outcome | 3290_50_C Simple mc  | 97  | 0.060782 | 0.083388 | 0.467833 |
| 3290_50_C finngen_R outcome | 3290_50_C Weighted   | 97  | -0.00713 | 0.046892 | 0.879457 |
| 3291_30_F finngen_R outcome | 3291_30_F MR Egger   | 47  | -0.0471  | 0.105753 | 0.658186 |
| 3291_30_F finngen_R outcome | 3291_30_F Weighted   | 47  | 0.015879 | 0.086354 | 0.854102 |
| 3291_30_F finngen_R outcome | 3291_30_F Inverse va | 47  | 0.013915 | 0.060404 | 0.81781  |
| 3291_30_F finngen_R outcome | 3291_30_F Simple mc  | 47  | 0.041121 | 0.154368 | 0.791137 |
| 3291_30_F finngen_R outcome | 3291_30_F Weighted   | 47  | 0.02167  | 0.079245 | 0.785728 |
| 3292_75_C finngen_R outcome | 3292_75_C MR Egger   | 25  | -0.24699 | 0.145344 | 0.102744 |
| 3292_75_C finngen_R outcome | 3292_75_C Weighted   | 25  | -0.1123  | 0.114742 | 0.32773  |
| 3292_75_C finngen_R outcome | 3292_75_C Inverse va | 25  | -0.04031 | 0.082578 | 0.625435 |
| 3292_75_C finngen_R outcome | 3292_75_C Simple mc  | 25  | -0.01956 | 0.19294  | 0.92009  |
| 3292_75_C finngen_R outcome | 3292_75_C Weighted   | 25  | -0.09199 | 0.116951 | 0.439256 |
| 3293_2_CI finngen_R outcome | 3293_2_CI MR Egger   | 50  | -0.13327 | 0.119464 | 0.27016  |
| 3293_2_CI finngen_R outcome | 3293_2_CI Weighted   | 50  | -0.02035 | 0.098183 | 0.835823 |
| 3293_2_CI finngen_R outcome | 3293_2_CI Inverse va | 50  | -0.00797 | 0.060165 | 0.894653 |
| 3293_2_CI finngen_R outcome | 3293_2_CI Simple mc  | 50  | 0.036553 | 0.174041 | 0.834519 |
| 3293_2_CI finngen_R outcome | 3293_2_CI Weighted   | 50  | -0.02678 | 0.09406  | 0.777061 |
| 3296_92_C finngen_R outcome | 3296_92_C MR Egger   | 119 | 0.019103 | 0.048921 | 0.696889 |
| 3296_92_C finngen_R outcome | 3296_92_C Weighted   | 119 | -0.01147 | 0.043562 | 0.792278 |
| 3296_92_C finngen_R outcome | 3296_92_C Inverse va | 119 | -0.01303 | 0.029539 | 0.659226 |
| 3296_92_C finngen_R outcome | 3296_92_C Simple mc  | 119 | -0.13524 | 0.087164 | 0.123448 |
| 3296_92_C finngen_R outcome | 3296_92_C Weighted   | 119 | -0.02775 | 0.038272 | 0.469804 |
| 3298_52_C finngen_R outcome | 3298_52_C MR Egger   | 69  | 0.040244 | 0.103489 | 0.698602 |
| 3298_52_C finngen_R outcome | 3298_52_C Weighted   | 69  | 0.057488 | 0.082279 | 0.484741 |
| 3298_52_C finngen_R outcome | 3298_52_C Inverse va | 69  | 0.027325 | 0.053132 | 0.607046 |
| 3298_52_C finngen_R outcome | 3298_52_C Simple mc  | 69  | -0.14604 | 0.146154 | 0.321233 |
| 3298_52_C finngen_R outcome | 3298_52_C Weighted   | 69  | -0.01055 | 0.084217 | 0.900647 |
| 3302_58_C finngen_R outcome | 3302_58_C MR Egger   | 80  | -0.01788 | 0.066897 | 0.789934 |
| 3302_58_C finngen_R outcome | 3302_58_C Weighted   | 80  | -0.03944 | 0.055696 | 0.47885  |
| 3302_58_C finngen_R outcome | 3302_58_C Inverse va | 80  | -0.00877 | 0.035487 | 0.804838 |
| 3302_58_C finngen_R outcome | 3302_58_C Simple mc  | 80  | -0.02937 | 0.097594 | 0.764252 |
| 3302_58_C finngen_R outcome | 3302_58_C Weighted   | 80  | -0.03887 | 0.054679 | 0.479295 |
| 3305_6_DI finngen_R outcome | 3305_6_DI Wald ratio | 1   | 0.131915 | 0.607595 | 0.828123 |
| 3309_2_FC finngen_R outcome | 3309_2_FC MR Egger   | 158 | -0.08514 | 0.031888 | 0.008385 |
| 3309_2_FC finngen_R outcome | 3309_2_FC Weighted   | 158 | -0.11462 | 0.031755 | 0.000307 |
| 3309_2_FC finngen_R outcome | 3309_2_FC Inverse va | 158 | -0.09644 | 0.018821 | 2.99E-07 |
| 3309_2_FC finngen_R outcome | 3309_2_FC Simple mc  | 158 | -0.08931 | 0.060211 | 0.139985 |
| 3309_2_FC finngen_R outcome | 3309_2_FC Weighted   | 158 | -0.07978 | 0.032102 | 0.013998 |

|                             |                      |     |          |          |          |
|-----------------------------|----------------------|-----|----------|----------|----------|
| 3310_62_F finngen_R outcome | 3310_62_F MR Egger   | 164 | -0.0908  | 0.031284 | 0.004217 |
| 3310_62_F finngen_R outcome | 3310_62_F Weighted   | 164 | -0.08563 | 0.028572 | 0.002726 |
| 3310_62_F finngen_R outcome | 3310_62_F Inverse va | 164 | -0.09129 | 0.019245 | 2.10E-06 |
| 3310_62_F finngen_R outcome | 3310_62_F Simple mc  | 164 | -0.07979 | 0.056967 | 0.16321  |
| 3310_62_F finngen_R outcome | 3310_62_F Weighted   | 164 | -0.07979 | 0.027238 | 0.003882 |
| 3311_27_F finngen_R outcome | 3311_27_F MR Egger   | 45  | 0.155322 | 0.109315 | 0.162566 |
| 3311_27_F finngen_R outcome | 3311_27_F Weighted   | 45  | 0.333063 | 0.083785 | 7.03E-05 |
| 3311_27_F finngen_R outcome | 3311_27_F Inverse va | 45  | 0.271596 | 0.064005 | 2.20E-05 |
| 3311_27_F finngen_R outcome | 3311_27_F Simple mc  | 45  | 0.415843 | 0.183498 | 0.02841  |
| 3311_27_F finngen_R outcome | 3311_27_F Weighted   | 45  | 0.3411   | 0.083882 | 0.000194 |
| 3313_21_F finngen_R outcome | 3313_21_F MR Egger   | 69  | 0.012472 | 0.076622 | 0.871191 |
| 3313_21_F finngen_R outcome | 3313_21_F Weighted   | 69  | -0.00584 | 0.069335 | 0.932897 |
| 3313_21_F finngen_R outcome | 3313_21_F Inverse va | 69  | 0.005986 | 0.046769 | 0.89816  |
| 3313_21_F finngen_R outcome | 3313_21_F Simple mc  | 69  | 0.227315 | 0.126953 | 0.077816 |
| 3313_21_F finngen_R outcome | 3313_21_F Weighted   | 69  | 0.042087 | 0.061017 | 0.492686 |
| 3320_49_I finngen_R outcome | 3320_49_I MR Egger   | 53  | 0.084416 | 0.092725 | 0.366899 |
| 3320_49_I finngen_R outcome | 3320_49_I Weighted   | 53  | 0.008172 | 0.075679 | 0.914012 |
| 3320_49_I finngen_R outcome | 3320_49_I Inverse va | 53  | 0.031016 | 0.052406 | 0.55395  |
| 3320_49_I finngen_R outcome | 3320_49_I Simple mc  | 53  | #####    | 0.147879 | 0.999589 |
| 3320_49_I finngen_R outcome | 3320_49_I Weighted   | 53  | 0.008231 | 0.074084 | 0.91196  |
| 3322_52_L finngen_R outcome | 3322_52_L MR Egger   | 56  | -0.19774 | 0.082641 | 0.02023  |
| 3322_52_L finngen_R outcome | 3322_52_L Weighted   | 56  | -0.05    | 0.068729 | 0.466881 |
| 3322_52_L finngen_R outcome | 3322_52_L Inverse va | 56  | -0.04383 | 0.052239 | 0.401453 |
| 3322_52_L finngen_R outcome | 3322_52_L Simple mc  | 56  | -0.04227 | 0.101126 | 0.677574 |
| 3322_52_L finngen_R outcome | 3322_52_L Weighted   | 56  | -0.09262 | 0.076007 | 0.228219 |
| 3323_37_L finngen_R outcome | 3323_37_L MR Egger   | 10  | 0.936967 | 0.630192 | 0.17538  |
| 3323_37_L finngen_R outcome | 3323_37_L Weighted   | 10  | 0.252541 | 0.179859 | 0.160287 |
| 3323_37_L finngen_R outcome | 3323_37_L Inverse va | 10  | 0.218833 | 0.180474 | 0.225303 |
| 3323_37_L finngen_R outcome | 3323_37_L Simple mc  | 10  | -0.0869  | 0.448871 | 0.850789 |
| 3323_37_L finngen_R outcome | 3323_37_L Weighted   | 10  | 0.29919  | 0.18947  | 0.148771 |
| 3324_51_L finngen_R outcome | 3324_51_L MR Egger   | 59  | -0.07928 | 0.069385 | 0.257956 |
| 3324_51_L finngen_R outcome | 3324_51_L Weighted   | 59  | -0.08364 | 0.060093 | 0.163947 |
| 3324_51_L finngen_R outcome | 3324_51_L Inverse va | 59  | -0.02953 | 0.041999 | 0.48198  |
| 3324_51_L finngen_R outcome | 3324_51_L Simple mc  | 59  | -0.08914 | 0.111819 | 0.428595 |
| 3324_51_L finngen_R outcome | 3324_51_L Weighted   | 59  | -0.08914 | 0.054677 | 0.108455 |
| 3325_2_M finngen_R outcome  | 3325_2_M MR Egger    | 9   | 0.531927 | 0.510017 | 0.331642 |
| 3325_2_M finngen_R outcome  | 3325_2_M Weighted    | 9   | -0.34006 | 0.21467  | 0.113166 |
| 3325_2_M finngen_R outcome  | 3325_2_M Inverse va  | 9   | -0.22532 | 0.204103 | 0.269622 |
| 3325_2_M finngen_R outcome  | 3325_2_M Simple mc   | 9   | -0.51636 | 0.307759 | 0.131906 |
| 3325_2_M finngen_R outcome  | 3325_2_M Weighted    | 9   | -0.42354 | 0.267754 | 0.152346 |
| 3327_27_I finngen_R outcome | 3327_27_I MR Egger   | 21  | 0.090862 | 0.14274  | 0.53201  |
| 3327_27_I finngen_R outcome | 3327_27_I Weighted   | 21  | 0.02579  | 0.114722 | 0.822128 |
| 3327_27_I finngen_R outcome | 3327_27_I Inverse va | 21  | -0.0598  | 0.083462 | 0.473676 |
| 3327_27_I finngen_R outcome | 3327_27_I Simple mc  | 21  | 0.002459 | 0.17677  | 0.989038 |
| 3327_27_I finngen_R outcome | 3327_27_I Weighted   | 21  | 0.029271 | 0.115555 | 0.802619 |
| 3329_14_F finngen_R outcome | 3329_14_F MR Egger   | 12  | -0.12153 | 0.309375 | 0.7027   |
| 3329_14_F finngen_R outcome | 3329_14_F Weighted   | 12  | 0.094663 | 0.172912 | 0.58406  |
| 3329_14_F finngen_R outcome | 3329_14_F Inverse va | 12  | 0.063699 | 0.14243  | 0.654708 |
| 3329_14_F finngen_R outcome | 3329_14_F Simple mc  | 12  | 0.146953 | 0.256403 | 0.578083 |
| 3329_14_F finngen_R outcome | 3329_14_F Weighted   | 12  | 0.099192 | 0.184486 | 0.601513 |
| 3336_50_T finngen_R outcome | 3336_50_T Wald ratio | 1   | 0.848154 | 0.956131 | 0.375042 |
| 3339_33_T finngen_R outcome | 3339_33_T MR Egger   | 94  | -0.03534 | 0.060177 | 0.558421 |
| 3339_33_T finngen_R outcome | 3339_33_T Weighted   | 94  | -0.04888 | 0.054174 | 0.366943 |
| 3339_33_T finngen_R outcome | 3339_33_T Inverse va | 94  | -0.06404 | 0.034169 | 0.060918 |
| 3339_33_T finngen_R outcome | 3339_33_T Simple mc  | 94  | -0.08342 | 0.095613 | 0.385205 |
| 3339_33_T finngen_R outcome | 3339_33_T Weighted   | 94  | -0.053   | 0.047044 | 0.262799 |
| 3340_53_T finngen_R outcome | 3340_53_T MR Egger   | 21  | 0.162664 | 0.144663 | 0.274835 |
| 3340_53_T finngen_R outcome | 3340_53_T Weighted   | 21  | 0.014472 | 0.115963 | 0.900684 |

|                              |                       |     |          |          |          |
|------------------------------|-----------------------|-----|----------|----------|----------|
| 3340_53_T finngen_R outcome  | 3340_53_T Inverse va  | 21  | 0.006603 | 0.082603 | 0.936291 |
| 3340_53_T finngen_R outcome  | 3340_53_T Simple mc   | 21  | -0.06169 | 0.175248 | 0.728527 |
| 3340_53_T finngen_R outcome  | 3340_53_T Weighted    | 21  | -0.01973 | 0.123913 | 0.875058 |
| 3344_60_S finngen_R outcome  | 3344_60_S Wald ratio  | 1   | -0.30572 | 0.945022 | 0.746315 |
| 3348_49_E finngen_R outcome  | 3348_49_E MR Egger    | 4   | -1.98806 | 2.326598 | 0.482853 |
| 3348_49_E finngen_R outcome  | 3348_49_E Weighted    | 4   | -0.08891 | 0.335281 | 0.790866 |
| 3348_49_E finngen_R outcome  | 3348_49_E Inverse va  | 4   | -0.11227 | 0.298163 | 0.706511 |
| 3348_49_E finngen_R outcome  | 3348_49_E Simple mc   | 4   | 0.035435 | 0.499618 | 0.947922 |
| 3348_49_E finngen_R outcome  | 3348_49_E Weighted    | 4   | -0.0747  | 0.461218 | 0.881635 |
| 3352_80_C finngen_R outcome  | 3352_80_C MR Egger    | 107 | -0.01498 | 0.056676 | 0.792124 |
| 3352_80_C finngen_R outcome  | 3352_80_C Weighted    | 107 | 0.043718 | 0.046662 | 0.348796 |
| 3352_80_C finngen_R outcome  | 3352_80_C Inverse va  | 107 | 0.04671  | 0.030768 | 0.128974 |
| 3352_80_C finngen_R outcome  | 3352_80_C Simple mc   | 107 | 0.021508 | 0.086294 | 0.80366  |
| 3352_80_C finngen_R outcome  | 3352_80_C Weighted    | 107 | 0.040371 | 0.049551 | 0.417053 |
| 3363_31_C finngen_R outcome  | 3363_31_C Wald ratio  | 1   | 0.040368 | 0.538696 | 0.940265 |
| 3364_76_C finngen_R outcome  | 3364_76_C MR Egger    | 23  | -0.11766 | 0.157304 | 0.462787 |
| 3364_76_C finngen_R outcome  | 3364_76_C Weighted    | 23  | -0.09615 | 0.119702 | 0.42183  |
| 3364_76_C finngen_R outcome  | 3364_76_C Inverse va  | 23  | -0.07705 | 0.087433 | 0.378209 |
| 3364_76_C finngen_R outcome  | 3364_76_C Simple mc   | 23  | -0.0654  | 0.20042  | 0.747259 |
| 3364_76_C finngen_R outcome  | 3364_76_C Weighted    | 23  | -0.10158 | 0.121238 | 0.411111 |
| 3366_51_E finngen_R outcome  | 3366_51_E MR Egger    | 55  | -0.05505 | 0.069934 | 0.434685 |
| 3366_51_E finngen_R outcome  | 3366_51_E Weighted    | 55  | -0.00971 | 0.04401  | 0.825339 |
| 3366_51_E finngen_R outcome  | 3366_51_E Inverse va  | 55  | -0.02611 | 0.030594 | 0.393365 |
| 3366_51_E finngen_R outcome  | 3366_51_E Simple mc   | 55  | 0.044151 | 0.069529 | 0.528113 |
| 3366_51_E finngen_R outcome  | 3366_51_E Weighted    | 55  | 0.012094 | 0.045728 | 0.792413 |
| 3378_49_k finngen_R outcome  | 3378_49_k MR Egger    | 23  | -0.24029 | 0.112413 | 0.044474 |
| 3378_49_k finngen_R outcome  | 3378_49_k Weighted    | 23  | -0.11141 | 0.097499 | 0.253178 |
| 3378_49_k finngen_R outcome  | 3378_49_k Inverse va  | 23  | -0.11586 | 0.071242 | 0.103872 |
| 3378_49_k finngen_R outcome  | 3378_49_k Simple mc   | 23  | -0.25772 | 0.175614 | 0.156375 |
| 3378_49_k finngen_R outcome  | 3378_49_k Weighted    | 23  | -0.14243 | 0.086539 | 0.114018 |
| 3389_7_SE finngen_R outcome  | 3389_7_SE MR Egger    | 23  | 0.002136 | 0.164807 | 0.989783 |
| 3389_7_SE finngen_R outcome  | 3389_7_SE Weighted    | 23  | -0.07654 | 0.117911 | 0.516239 |
| 3389_7_SE finngen_R outcome  | 3389_7_SE Inverse va  | 23  | -0.05542 | 0.084055 | 0.509658 |
| 3389_7_SE finngen_R outcome  | 3389_7_SE Simple mc   | 23  | -0.12861 | 0.191447 | 0.508735 |
| 3389_7_SE finngen_R outcome  | 3389_7_SE Weighted    | 23  | -0.085   | 0.128781 | 0.516095 |
| 3391_10_F finngen_R outcome  | 3391_10_F Wald ratio  | 1   | 0.467386 | 0.708186 | 0.509269 |
| 3396_54_F finngen_R outcome  | 3396_54_F MR Egger    | 8   | 0.941924 | 0.3535   | 0.037296 |
| 3396_54_F finngen_R outcome  | 3396_54_F Weighted    | 8   | 0.605961 | 0.232872 | 0.009265 |
| 3396_54_F finngen_R outcome  | 3396_54_F Inverse va  | 8   | 0.39146  | 0.192445 | 0.041937 |
| 3396_54_F finngen_R outcome  | 3396_54_F Simple mc   | 8   | -0.22772 | 0.394725 | 0.582071 |
| 3396_54_F finngen_R outcome  | 3396_54_F Weighted    | 8   | 0.585329 | 0.263038 | 0.061398 |
| 3415_61_ll finngen_R outcome | 3415_61_ll Inverse va | 2   | -0.48664 | 0.721191 | 0.499819 |
| 3419_49_C finngen_R outcome  | 3419_49_C Wald ratio  | 1   | 0.553178 | 0.790465 | 0.484044 |
| 3420_21_C finngen_R outcome  | 3420_21_C MR Egger    | 22  | 0.006965 | 0.133054 | 0.95877  |
| 3420_21_C finngen_R outcome  | 3420_21_C Weighted    | 22  | 0.021046 | 0.093007 | 0.820983 |
| 3420_21_C finngen_R outcome  | 3420_21_C Inverse va  | 22  | 0.05678  | 0.07179  | 0.428988 |
| 3420_21_C finngen_R outcome  | 3420_21_C Simple mc   | 22  | 0.106761 | 0.165636 | 0.526196 |
| 3420_21_C finngen_R outcome  | 3420_21_C Weighted    | 22  | 0.012952 | 0.097174 | 0.895237 |
| 3421_54_T finngen_R outcome  | 3421_54_T MR Egger    | 10  | -0.10824 | 0.424687 | 0.80525  |
| 3421_54_T finngen_R outcome  | 3421_54_T Weighted    | 10  | -0.2358  | 0.216855 | 0.276878 |
| 3421_54_T finngen_R outcome  | 3421_54_T Inverse va  | 10  | -0.3483  | 0.167744 | 0.03786  |
| 3421_54_T finngen_R outcome  | 3421_54_T Simple mc   | 10  | -0.17999 | 0.335776 | 0.604931 |
| 3421_54_T finngen_R outcome  | 3421_54_T Weighted    | 10  | -0.20038 | 0.231841 | 0.409863 |
| 3431_54_E finngen_R outcome  | 3431_54_E MR Egger    | 64  | 0.04008  | 0.041198 | 0.334397 |
| 3431_54_E finngen_R outcome  | 3431_54_E Weighted    | 64  | -0.00661 | 0.039628 | 0.867585 |
| 3431_54_E finngen_R outcome  | 3431_54_E Inverse va  | 64  | -0.02588 | 0.029075 | 0.373362 |
| 3431_54_E finngen_R outcome  | 3431_54_E Simple mc   | 64  | -0.06096 | 0.078365 | 0.439567 |
| 3431_54_E finngen_R outcome  | 3431_54_E Weighted    | 64  | -0.01889 | 0.035098 | 0.592367 |

|                              |                       |     |          |          |          |
|------------------------------|-----------------------|-----|----------|----------|----------|
| 3434_34_F finngen_R outcome  | 3434_34_F MR Egger    | 8   | -0.14902 | 0.441889 | 0.747427 |
| 3434_34_F finngen_R outcome  | 3434_34_F Weighted    | 8   | -0.26948 | 0.238315 | 0.25815  |
| 3434_34_F finngen_R outcome  | 3434_34_F Inverse va  | 8   | -0.4208  | 0.188573 | 0.02565  |
| 3434_34_F finngen_R outcome  | 3434_34_F Simple mc   | 8   | -0.19219 | 0.359544 | 0.609512 |
| 3434_34_F finngen_R outcome  | 3434_34_F Weighted    | 8   | -0.23632 | 0.249827 | 0.375681 |
| 3435_53_F finngen_R outcome  | 3435_53_F MR Egger    | 10  | 0.038377 | 0.438365 | 0.93239  |
| 3435_53_F finngen_R outcome  | 3435_53_F Weighted    | 10  | -0.25804 | 0.223268 | 0.247785 |
| 3435_53_F finngen_R outcome  | 3435_53_F Inverse va  | 10  | -0.36413 | 0.181894 | 0.045296 |
| 3435_53_F finngen_R outcome  | 3435_53_F Simple mc   | 10  | -0.17904 | 0.407499 | 0.670755 |
| 3435_53_F finngen_R outcome  | 3435_53_F Weighted    | 10  | -0.22809 | 0.257008 | 0.397913 |
| 3438_10_F finngen_R outcome  | 3438_10_F MR Egger    | 9   | -0.18923 | 0.473295 | 0.701213 |
| 3438_10_F finngen_R outcome  | 3438_10_F Weighted    | 9   | 0.072863 | 0.255981 | 0.775917 |
| 3438_10_F finngen_R outcome  | 3438_10_F Inverse va  | 9   | 0.204833 | 0.23878  | 0.390986 |
| 3438_10_F finngen_R outcome  | 3438_10_F Simple mc   | 9   | 0.143988 | 0.427787 | 0.745086 |
| 3438_10_F finngen_R outcome  | 3438_10_F Weighted    | 9   | 0.074601 | 0.310243 | 0.816022 |
| 3440_7_G; finngen_R outcome  | 3440_7_G; MR Egger    | 21  | 0.115029 | 0.225927 | 0.616516 |
| 3440_7_G; finngen_R outcome  | 3440_7_G; Weighted    | 21  | -0.25815 | 0.16617  | 0.120304 |
| 3440_7_G; finngen_R outcome  | 3440_7_G; Inverse va  | 21  | -0.22938 | 0.142194 | 0.106718 |
| 3440_7_G; finngen_R outcome  | 3440_7_G; Simple mc   | 21  | -0.47246 | 0.2832   | 0.110842 |
| 3440_7_G; finngen_R outcome  | 3440_7_G; Weighted    | 21  | -0.38298 | 0.258256 | 0.153675 |
| 3445_53_II finngen_R outcome | 3445_53_II Wald ratio | 1   | -0.16865 | 0.67319  | 0.802187 |
| 3448_13_II finngen_R outcome | 3448_13_II MR Egger   | 3   | 0.54476  | 0.930394 | 0.662782 |
| 3448_13_II finngen_R outcome | 3448_13_II Weighted   | 3   | -0.25795 | 0.34364  | 0.452864 |
| 3448_13_II finngen_R outcome | 3448_13_II Inverse va | 3   | -0.23945 | 0.296222 | 0.418887 |
| 3448_13_II finngen_R outcome | 3448_13_II Simple mc  | 3   | -0.39838 | 0.439313 | 0.460214 |
| 3448_13_II finngen_R outcome | 3448_13_II Weighted   | 3   | -0.34286 | 0.45534  | 0.530034 |
| 3449_58_Σ finngen_R outcome  | 3449_58_Σ MR Egger    | 94  | -0.01196 | 0.071269 | 0.86713  |
| 3449_58_Σ finngen_R outcome  | 3449_58_Σ Weighted    | 94  | -0.10866 | 0.064848 | 0.093803 |
| 3449_58_Σ finngen_R outcome  | 3449_58_Σ Inverse va  | 94  | -0.06264 | 0.040802 | 0.124739 |
| 3449_58_Σ finngen_R outcome  | 3449_58_Σ Simple mc   | 94  | -0.10191 | 0.110656 | 0.359429 |
| 3449_58_Σ finngen_R outcome  | 3449_58_Σ Weighted    | 94  | -0.08132 | 0.061407 | 0.188657 |
| 3457_57_F finngen_R outcome  | 3457_57_F MR Egger    | 29  | 0.180216 | 0.199145 | 0.373498 |
| 3457_57_F finngen_R outcome  | 3457_57_F Weighted    | 29  | 0.120323 | 0.116663 | 0.302364 |
| 3457_57_F finngen_R outcome  | 3457_57_F Inverse va  | 29  | 0.051978 | 0.086619 | 0.548456 |
| 3457_57_F finngen_R outcome  | 3457_57_F Simple mc   | 29  | 0.08001  | 0.187242 | 0.672423 |
| 3457_57_F finngen_R outcome  | 3457_57_F Weighted    | 29  | 0.098079 | 0.140419 | 0.490642 |
| 3459_49_F finngen_R outcome  | 3459_49_F MR Egger    | 167 | 0.012068 | 0.033062 | 0.715573 |
| 3459_49_F finngen_R outcome  | 3459_49_F Weighted    | 167 | 0.034549 | 0.030088 | 0.250864 |
| 3459_49_F finngen_R outcome  | 3459_49_F Inverse va  | 167 | 0.025503 | 0.019048 | 0.180615 |
| 3459_49_F finngen_R outcome  | 3459_49_F Simple mc   | 167 | 0.045144 | 0.053442 | 0.39948  |
| 3459_49_F finngen_R outcome  | 3459_49_F Weighted    | 167 | 0.019729 | 0.02779  | 0.478749 |
| 3461_58_E finngen_R outcome  | 3461_58_E MR Egger    | 12  | -0.35879 | 0.393129 | 0.382898 |
| 3461_58_E finngen_R outcome  | 3461_58_E Weighted    | 12  | -0.17674 | 0.169066 | 0.295849 |
| 3461_58_E finngen_R outcome  | 3461_58_E Inverse va  | 12  | -0.16798 | 0.152431 | 0.270465 |
| 3461_58_E finngen_R outcome  | 3461_58_E Simple mc   | 12  | -0.36773 | 0.357762 | 0.326083 |
| 3461_58_E finngen_R outcome  | 3461_58_E Weighted    | 12  | -0.1162  | 0.181773 | 0.535753 |
| 3470_1_SE finngen_R outcome  | 3470_1_SE MR Egger    | 5   | -0.43892 | 0.803186 | 0.622762 |
| 3470_1_SE finngen_R outcome  | 3470_1_SE Weighted    | 5   | 0.401856 | 0.311995 | 0.197739 |
| 3470_1_SE finngen_R outcome  | 3470_1_SE Inverse va  | 5   | 0.46637  | 0.256931 | 0.0695   |
| 3470_1_SE finngen_R outcome  | 3470_1_SE Simple mc   | 5   | 0.188844 | 0.454256 | 0.698949 |
| 3470_1_SE finngen_R outcome  | 3470_1_SE Weighted    | 5   | 0.304241 | 0.410289 | 0.499548 |
| 3474_19_T finngen_R outcome  | 3474_19_T Wald ratio  | 1   | -0.11393 | 0.8149   | 0.888816 |
| 3484_60_ƒ finngen_R outcome  | 3484_60_ƒ MR Egger    | 15  | 0.163138 | 0.247614 | 0.521498 |
| 3484_60_ƒ finngen_R outcome  | 3484_60_ƒ Weighted    | 15  | 0.207652 | 0.163667 | 0.20453  |
| 3484_60_ƒ finngen_R outcome  | 3484_60_ƒ Inverse va  | 15  | 0.098308 | 0.136043 | 0.469911 |
| 3484_60_ƒ finngen_R outcome  | 3484_60_ƒ Simple mc   | 15  | 0.247158 | 0.285727 | 0.401611 |
| 3484_60_ƒ finngen_R outcome  | 3484_60_ƒ Weighted    | 15  | 0.23797  | 0.165171 | 0.171644 |
| 3488_64_C finngen_R outcome  | 3488_64_C MR Egger    | 10  | 0.314856 | 0.351127 | 0.39606  |



|                              |                       |     |          |          |          |
|------------------------------|-----------------------|-----|----------|----------|----------|
| 3488_64_C finngen_R outcome  | 3488_64_C Weighted    | 10  | 0.299946 | 0.16297  | 0.065696 |
| 3488_64_C finngen_R outcome  | 3488_64_C Inverse va  | 10  | 0.279696 | 0.125122 | 0.025392 |
| 3488_64_C finngen_R outcome  | 3488_64_C Simple mc   | 10  | 0.195196 | 0.223174 | 0.404509 |
| 3488_64_C finngen_R outcome  | 3488_64_C Weighted    | 10  | 0.245648 | 0.164666 | 0.169949 |
| 3495_15_C finngen_R outcome  | 3495_15_C MR Egger    | 88  | -0.09587 | 0.077269 | 0.218098 |
| 3495_15_C finngen_R outcome  | 3495_15_C Weighted    | 88  | 0.003746 | 0.061646 | 0.951549 |
| 3495_15_C finngen_R outcome  | 3495_15_C Inverse va  | 88  | -0.02349 | 0.039734 | 0.554441 |
| 3495_15_C finngen_R outcome  | 3495_15_C Simple mc   | 88  | 0.083002 | 0.11611  | 0.476611 |
| 3495_15_C finngen_R outcome  | 3495_15_C Weighted    | 88  | 0.015973 | 0.073104 | 0.827554 |
| 3499_77_II finngen_R outcome | 3499_77_II Wald ratio | 1   | -0.92166 | 0.547696 | 0.092414 |
| 3508_78_C finngen_R outcome  | 3508_78_C MR Egger    | 42  | -0.16289 | 0.148355 | 0.27877  |
| 3508_78_C finngen_R outcome  | 3508_78_C Weighted    | 42  | 0.023567 | 0.104187 | 0.821049 |
| 3508_78_C finngen_R outcome  | 3508_78_C Inverse va  | 42  | -0.0545  | 0.08132  | 0.502748 |
| 3508_78_C finngen_R outcome  | 3508_78_C Simple mc   | 42  | -0.18215 | 0.187452 | 0.336901 |
| 3508_78_C finngen_R outcome  | 3508_78_C Weighted    | 42  | -0.01454 | 0.128565 | 0.910512 |
| 3516_60_C finngen_R outcome  | 3516_60_C MR Egger    | 9   | 0.996595 | 0.459668 | 0.066807 |
| 3516_60_C finngen_R outcome  | 3516_60_C Weighted    | 9   | 0.530209 | 0.203031 | 0.009015 |
| 3516_60_C finngen_R outcome  | 3516_60_C Inverse va  | 9   | 0.34286  | 0.158304 | 0.030324 |
| 3516_60_C finngen_R outcome  | 3516_60_C Simple mc   | 9   | 0.016962 | 0.325031 | 0.959661 |
| 3516_60_C finngen_R outcome  | 3516_60_C Weighted    | 9   | 0.602356 | 0.245955 | 0.039996 |
| 3518_54_C finngen_R outcome  | 3518_54_C MR Egger    | 68  | 0.019419 | 0.084391 | 0.818719 |
| 3518_54_C finngen_R outcome  | 3518_54_C Weighted    | 68  | -0.00378 | 0.067496 | 0.955394 |
| 3518_54_C finngen_R outcome  | 3518_54_C Inverse va  | 68  | -0.01893 | 0.046032 | 0.680843 |
| 3518_54_C finngen_R outcome  | 3518_54_C Simple mc   | 68  | -0.10627 | 0.129733 | 0.415591 |
| 3518_54_C finngen_R outcome  | 3518_54_C Weighted    | 68  | -0.05596 | 0.072396 | 0.44223  |
| 3519_3_C( finngen_R outcome  | 3519_3_C( MR Egger    | 15  | -0.34663 | 0.193024 | 0.0958   |
| 3519_3_C( finngen_R outcome  | 3519_3_C( Weighted    | 15  | -0.26195 | 0.130311 | 0.044414 |
| 3519_3_C( finngen_R outcome  | 3519_3_C( Inverse va  | 15  | -0.23242 | 0.100871 | 0.021216 |
| 3519_3_C( finngen_R outcome  | 3519_3_C( Simple mc   | 15  | -0.22504 | 0.19989  | 0.279178 |
| 3519_3_C( finngen_R outcome  | 3519_3_C( Weighted    | 15  | -0.2499  | 0.133922 | 0.083131 |
| 3535_84_[] finngen_R outcome | 3535_84_[] MR Egger   | 33  | 0.080946 | 0.107191 | 0.455856 |
| 3535_84_[] finngen_R outcome | 3535_84_[] Weighted   | 33  | 0.054724 | 0.110751 | 0.621221 |
| 3535_84_[] finngen_R outcome | 3535_84_[] Inverse va | 33  | 0.019736 | 0.073035 | 0.786985 |
| 3535_84_[] finngen_R outcome | 3535_84_[] Simple mc  | 33  | 0.126353 | 0.168208 | 0.458038 |
| 3535_84_[] finngen_R outcome | 3535_84_[] Weighted   | 33  | 0.094632 | 0.102137 | 0.361112 |
| 3554_24_# finngen_R outcome  | 3554_24_# MR Egger    | 29  | 0.160459 | 0.140522 | 0.263532 |
| 3554_24_# finngen_R outcome  | 3554_24_# Weighted    | 29  | 0.149333 | 0.112731 | 0.185275 |
| 3554_24_# finngen_R outcome  | 3554_24_# Inverse va  | 29  | 0.049875 | 0.079568 | 0.530776 |
| 3554_24_# finngen_R outcome  | 3554_24_# Simple mc   | 29  | 0.143462 | 0.178102 | 0.427317 |
| 3554_24_# finngen_R outcome  | 3554_24_# Weighted    | 29  | 0.1368   | 0.121755 | 0.270739 |
| 3580_25_§ finngen_R outcome  | 3580_25_§ MR Egger    | 99  | -0.07311 | 0.058003 | 0.210511 |
| 3580_25_§ finngen_R outcome  | 3580_25_§ Weighted    | 99  | -0.09708 | 0.053952 | 0.071967 |
| 3580_25_§ finngen_R outcome  | 3580_25_§ Inverse va  | 99  | -0.05744 | 0.033376 | 0.085255 |
| 3580_25_§ finngen_R outcome  | 3580_25_§ Simple mc   | 99  | -0.06987 | 0.107601 | 0.517615 |
| 3580_25_§ finngen_R outcome  | 3580_25_§ Weighted    | 99  | -0.06987 | 0.048718 | 0.154688 |
| 3581_53_# finngen_R outcome  | 3581_53_# MR Egger    | 63  | -0.14191 | 0.103856 | 0.176838 |
| 3581_53_# finngen_R outcome  | 3581_53_# Weighted    | 63  | -0.03268 | 0.089803 | 0.715955 |
| 3581_53_# finngen_R outcome  | 3581_53_# Inverse va  | 63  | -0.06137 | 0.054323 | 0.258599 |
| 3581_53_# finngen_R outcome  | 3581_53_# Simple mc   | 63  | -0.06378 | 0.145107 | 0.661822 |
| 3581_53_# finngen_R outcome  | 3581_53_# Weighted    | 63  | -0.04496 | 0.083748 | 0.59332  |
| 3583_54_# finngen_R outcome  | 3583_54_# Wald ratio  | 1   | -0.38622 | 1.001155 | 0.699662 |
| 3593_72_C finngen_R outcome  | 3593_72_C MR Egger    | 8   | 0.280932 | 0.479598 | 0.579383 |
| 3593_72_C finngen_R outcome  | 3593_72_C Weighted    | 8   | 0.150394 | 0.247263 | 0.543031 |
| 3593_72_C finngen_R outcome  | 3593_72_C Inverse va  | 8   | 0.136401 | 0.204438 | 0.504647 |
| 3593_72_C finngen_R outcome  | 3593_72_C Simple mc   | 8   | 0.148745 | 0.333239 | 0.668818 |
| 3593_72_C finngen_R outcome  | 3593_72_C Weighted    | 8   | 0.148745 | 0.324307 | 0.660383 |
| 3600_2_Cf finngen_R outcome  | 3600_2_Cf MR Egger    | 129 | 0.004335 | 0.032253 | 0.893301 |
| 3600_2_Cf finngen_R outcome  | 3600_2_Cf Weighted    | 129 | 0.001345 | 0.035552 | 0.969822 |

|                             |                      |     |          |          |          |
|-----------------------------|----------------------|-----|----------|----------|----------|
| 3600_2_Cf finngen_R outcome | 3600_2_Cf Inverse va | 129 | 0.0447   | 0.022212 | 0.044171 |
| 3600_2_Cf finngen_R outcome | 3600_2_Cf Simple mc  | 129 | 0.047301 | 0.07173  | 0.510802 |
| 3600_2_Cf finngen_R outcome | 3600_2_Cf Weighted   | 129 | 0.047301 | 0.034702 | 0.175261 |
| 3605_77_M finngen_R outcome | 3605_77_M MR Egger   | 3   | -0.47853 | 1.727685 | 0.827984 |
| 3605_77_M finngen_R outcome | 3605_77_M Weighted   | 3   | -0.20859 | 0.346236 | 0.546881 |
| 3605_77_M finngen_R outcome | 3605_77_M Inverse va | 3   | -0.09556 | 0.316724 | 0.762876 |
| 3605_77_M finngen_R outcome | 3605_77_M Simple mc  | 3   | -0.28853 | 0.473422 | 0.604236 |
| 3605_77_M finngen_R outcome | 3605_77_M Weighted   | 3   | -0.25249 | 0.431498 | 0.617671 |
| 3607_71_C finngen_R outcome | 3607_71_C MR Egger   | 46  | 0.131466 | 0.117255 | 0.268287 |
| 3607_71_C finngen_R outcome | 3607_71_C Weighted   | 46  | 0.108246 | 0.095381 | 0.256426 |
| 3607_71_C finngen_R outcome | 3607_71_C Inverse va | 46  | 0.119474 | 0.059885 | 0.046036 |
| 3607_71_C finngen_R outcome | 3607_71_C Simple mc  | 46  | 0.06434  | 0.158856 | 0.68738  |
| 3607_71_C finngen_R outcome | 3607_71_C Weighted   | 46  | 0.110269 | 0.09391  | 0.246493 |
| 3617_80_F finngen_R outcome | 3617_80_F MR Egger   | 149 | 0.061222 | 0.036063 | 0.091689 |
| 3617_80_F finngen_R outcome | 3617_80_F Weighted   | 149 | 0.026309 | 0.034034 | 0.439516 |
| 3617_80_F finngen_R outcome | 3617_80_F Inverse va | 149 | 0.006852 | 0.02306  | 0.766355 |
| 3617_80_F finngen_R outcome | 3617_80_F Simple mc  | 149 | -0.00949 | 0.05971  | 0.873939 |
| 3617_80_F finngen_R outcome | 3617_80_F Weighted   | 149 | 0.031885 | 0.030532 | 0.298055 |
| 3622_33_L finngen_R outcome | 3622_33_L MR Egger   | 21  | -0.16765 | 0.181987 | 0.368494 |
| 3622_33_L finngen_R outcome | 3622_33_L Weighted   | 21  | -0.11776 | 0.133494 | 0.37771  |
| 3622_33_L finngen_R outcome | 3622_33_L Inverse va | 21  | -0.15846 | 0.095996 | 0.098805 |
| 3622_33_L finngen_R outcome | 3622_33_L Simple mc  | 21  | -0.05836 | 0.218344 | 0.791991 |
| 3622_33_L finngen_R outcome | 3622_33_L Weighted   | 21  | -0.08254 | 0.161478 | 0.614828 |
| 3640_14_L finngen_R outcome | 3640_14_L MR Egger   | 14  | -0.06819 | 0.203751 | 0.743659 |
| 3640_14_L finngen_R outcome | 3640_14_L Weighted   | 14  | -0.15148 | 0.16372  | 0.354857 |
| 3640_14_L finngen_R outcome | 3640_14_L Inverse va | 14  | -0.15991 | 0.138154 | 0.247069 |
| 3640_14_L finngen_R outcome | 3640_14_L Simple mc  | 14  | -0.36524 | 0.301397 | 0.247141 |
| 3640_14_L finngen_R outcome | 3640_14_L Weighted   | 14  | -0.12176 | 0.162635 | 0.467393 |
| 3651_50_k finngen_R outcome | 3651_50_k MR Egger   | 25  | 0.084327 | 0.0993   | 0.404517 |
| 3651_50_k finngen_R outcome | 3651_50_k Weighted   | 25  | 0.039559 | 0.092608 | 0.669258 |
| 3651_50_k finngen_R outcome | 3651_50_k Inverse va | 25  | 0.063631 | 0.068984 | 0.356318 |
| 3651_50_k finngen_R outcome | 3651_50_k Simple mc  | 25  | -0.02238 | 0.160138 | 0.890018 |
| 3651_50_k finngen_R outcome | 3651_50_k Weighted   | 25  | 0.030085 | 0.083457 | 0.721637 |
| 3710_49_F finngen_R outcome | 3710_49_F MR Egger   | 47  | 0.074532 | 0.110365 | 0.502924 |
| 3710_49_F finngen_R outcome | 3710_49_F Weighted   | 47  | -0.04079 | 0.087296 | 0.640308 |
| 3710_49_F finngen_R outcome | 3710_49_F Inverse va | 47  | -0.06448 | 0.057831 | 0.264871 |
| 3710_49_F finngen_R outcome | 3710_49_F Simple mc  | 47  | 0.197999 | 0.170874 | 0.252541 |
| 3710_49_F finngen_R outcome | 3710_49_F Weighted   | 47  | -0.05772 | 0.127667 | 0.653306 |
| 3727_35_F finngen_R outcome | 3727_35_F MR Egger   | 3   | -0.73005 | 1.651708 | 0.735053 |
| 3727_35_F finngen_R outcome | 3727_35_F Weighted   | 3   | 0.356606 | 0.480186 | 0.457699 |
| 3727_35_F finngen_R outcome | 3727_35_F Inverse va | 3   | 0.336886 | 0.412733 | 0.414367 |
| 3727_35_F finngen_R outcome | 3727_35_F Simple mc  | 3   | 0.298077 | 0.584612 | 0.660836 |
| 3727_35_F finngen_R outcome | 3727_35_F Weighted   | 3   | 0.41728  | 0.566871 | 0.538291 |
| 3773_15_T finngen_R outcome | 3773_15_T MR Egger   | 19  | 0.036973 | 0.189335 | 0.847491 |
| 3773_15_T finngen_R outcome | 3773_15_T Weighted   | 19  | -0.06463 | 0.13758  | 0.638546 |
| 3773_15_T finngen_R outcome | 3773_15_T Inverse va | 19  | -0.12797 | 0.102319 | 0.211063 |
| 3773_15_T finngen_R outcome | 3773_15_T Simple mc  | 19  | -0.13006 | 0.224343 | 0.569275 |
| 3773_15_T finngen_R outcome | 3773_15_T Weighted   | 19  | -0.04223 | 0.158031 | 0.792318 |
| 3795_6_AI finngen_R outcome | 3795_6_AI Wald ratio | 1   | -0.43781 | 1.005111 | 0.66314  |
| 3796_79_F finngen_R outcome | 3796_79_F Wald ratio | 1   | 0.096569 | 0.326395 | 0.767333 |
| 3799_11_C finngen_R outcome | 3799_11_C MR Egger   | 25  | 0.275758 | 0.215274 | 0.212972 |
| 3799_11_C finngen_R outcome | 3799_11_C Weighted   | 25  | 0.123692 | 0.149365 | 0.407604 |
| 3799_11_C finngen_R outcome | 3799_11_C Inverse va | 25  | 0.043298 | 0.108865 | 0.690836 |
| 3799_11_C finngen_R outcome | 3799_11_C Simple mc  | 25  | -0.06459 | 0.248221 | 0.79692  |
| 3799_11_C finngen_R outcome | 3799_11_C Weighted   | 25  | 0.088558 | 0.193529 | 0.651359 |
| 3803_10_C finngen_R outcome | 3803_10_C MR Egger   | 103 | -0.02678 | 0.050598 | 0.597747 |
| 3803_10_C finngen_R outcome | 3803_10_C Weighted   | 103 | -0.04679 | 0.051922 | 0.367521 |
| 3803_10_C finngen_R outcome | 3803_10_C Inverse va | 103 | -0.06828 | 0.029405 | 0.020239 |

|                             |                      |     |          |          |          |
|-----------------------------|----------------------|-----|----------|----------|----------|
| 3803_10_C finngen_R outcome | 3803_10_C Simple mc  | 103 | -0.11526 | 0.100972 | 0.256331 |
| 3803_10_C finngen_R outcome | 3803_10_C Weighted   | 103 | -0.03797 | 0.045677 | 0.407784 |
| 3805_16_E finngen_R outcome | 3805_16_E MR Egger   | 8   | -0.03463 | 0.525184 | 0.949573 |
| 3805_16_E finngen_R outcome | 3805_16_E Weighted   | 8   | 0.051697 | 0.198893 | 0.794922 |
| 3805_16_E finngen_R outcome | 3805_16_E Inverse va | 8   | 0.055932 | 0.160649 | 0.727717 |
| 3805_16_E finngen_R outcome | 3805_16_E Simple mc  | 8   | 0.181261 | 0.267682 | 0.520054 |
| 3805_16_E finngen_R outcome | 3805_16_E Weighted   | 8   | 0.079938 | 0.215577 | 0.721745 |
| 3806_55_E finngen_R outcome | 3806_55_E MR Egger   | 5   | -0.48996 | 0.844805 | 0.602621 |
| 3806_55_E finngen_R outcome | 3806_55_E Weighted   | 5   | 0.127889 | 0.269214 | 0.634753 |
| 3806_55_E finngen_R outcome | 3806_55_E Inverse va | 5   | 0.179612 | 0.294386 | 0.54178  |
| 3806_55_E finngen_R outcome | 3806_55_E Simple mc  | 5   | 0.219345 | 0.37221  | 0.587332 |
| 3806_55_E finngen_R outcome | 3806_55_E Weighted   | 5   | 0.179489 | 0.343705 | 0.629105 |
| 3807_1_FC finngen_R outcome | 3807_1_FC Wald ratio | 1   | 1.115853 | 0.698692 | 0.110252 |
| 3810_50_F finngen_R outcome | 3810_50_F MR Egger   | 8   | -0.58853 | 0.371535 | 0.164272 |
| 3810_50_F finngen_R outcome | 3810_50_F Weighted   | 8   | -0.12995 | 0.23773  | 0.584625 |
| 3810_50_F finngen_R outcome | 3810_50_F Inverse va | 8   | 0.06683  | 0.191931 | 0.72769  |
| 3810_50_F finngen_R outcome | 3810_50_F Simple mc  | 8   | -0.15607 | 0.414752 | 0.717842 |
| 3810_50_F finngen_R outcome | 3810_50_F Weighted   | 8   | -0.16728 | 0.243585 | 0.514341 |
| 3820_68_M finngen_R outcome | 3820_68_M MR Egger   | 9   | 0.439659 | 0.457529 | 0.368591 |
| 3820_68_M finngen_R outcome | 3820_68_M Weighted   | 9   | -0.23606 | 0.187999 | 0.209253 |
| 3820_68_M finngen_R outcome | 3820_68_M Inverse va | 9   | -0.22797 | 0.158549 | 0.150472 |
| 3820_68_M finngen_R outcome | 3820_68_M Simple mc  | 9   | -0.53134 | 0.344585 | 0.16165  |
| 3820_68_M finngen_R outcome | 3820_68_M Weighted   | 9   | -0.1426  | 0.188187 | 0.47033  |
| 3825_18_M finngen_R outcome | 3825_18_M Wald ratio | 1   | -0.52918 | 0.634767 | 0.404469 |
| 3835_11_T finngen_R outcome | 3835_11_T Wald ratio | 1   | -0.57094 | 0.507872 | 0.260934 |
| 3848_14_C finngen_R outcome | 3848_14_C Wald ratio | 1   | 0.159654 | 0.704263 | 0.820659 |
| 3858_5_A finngen_R outcome  | 3858_5_A MR Egger    | 98  | 0.018018 | 0.041516 | 0.665258 |
| 3858_5_A finngen_R outcome  | 3858_5_A Weighted    | 98  | 0.025806 | 0.03626  | 0.476656 |
| 3858_5_A finngen_R outcome  | 3858_5_A Inverse va  | 98  | 0.031429 | 0.025625 | 0.220018 |
| 3858_5_A finngen_R outcome  | 3858_5_A Simple mc   | 98  | 0.092558 | 0.059019 | 0.120073 |
| 3858_5_A finngen_R outcome  | 3858_5_A Weighted    | 98  | 0.03998  | 0.033607 | 0.237083 |
| 3890_8_LC finngen_R outcome | 3890_8_LC MR Egger   | 4   | 0.531285 | 0.890405 | 0.611268 |
| 3890_8_LC finngen_R outcome | 3890_8_LC Weighted   | 4   | 0.316054 | 0.373299 | 0.39719  |
| 3890_8_LC finngen_R outcome | 3890_8_LC Inverse va | 4   | 0.424116 | 0.299758 | 0.157108 |
| 3890_8_LC finngen_R outcome | 3890_8_LC Simple mc  | 4   | 0.170725 | 0.587184 | 0.790182 |
| 3890_8_LC finngen_R outcome | 3890_8_LC Weighted   | 4   | 0.090602 | 0.573214 | 0.884449 |
| 3905_62_U finngen_R outcome | 3905_62_U Wald ratio | 1   | 0.409776 | 0.715929 | 0.567072 |
| 4126_22_E finngen_R outcome | 4126_22_E MR Egger   | 88  | -0.06129 | 0.05704  | 0.285633 |
| 4126_22_E finngen_R outcome | 4126_22_E Weighted   | 88  | -0.01311 | 0.053946 | 0.808032 |
| 4126_22_E finngen_R outcome | 4126_22_E Inverse va | 88  | -0.03577 | 0.035296 | 0.310883 |
| 4126_22_E finngen_R outcome | 4126_22_E Simple mc  | 88  | 0.069542 | 0.098202 | 0.480748 |
| 4126_22_E finngen_R outcome | 4126_22_E Weighted   | 88  | -0.05003 | 0.054584 | 0.361884 |
| 4127_75_C finngen_R outcome | 4127_75_C MR Egger   | 16  | 0.097566 | 0.309535 | 0.757258 |
| 4127_75_C finngen_R outcome | 4127_75_C Weighted   | 16  | 0.146933 | 0.204881 | 0.473275 |
| 4127_75_C finngen_R outcome | 4127_75_C Inverse va | 16  | 0.055764 | 0.151235 | 0.712336 |
| 4127_75_C finngen_R outcome | 4127_75_C Simple mc  | 16  | 0.462208 | 0.416288 | 0.284348 |
| 4127_75_C finngen_R outcome | 4127_75_C Weighted   | 16  | 0.30381  | 0.336704 | 0.381155 |
| 4131_72_F finngen_R outcome | 4131_72_F MR Egger   | 11  | -0.14273 | 0.364223 | 0.704262 |
| 4131_72_F finngen_R outcome | 4131_72_F Weighted   | 11  | -0.25759 | 0.207717 | 0.214936 |
| 4131_72_F finngen_R outcome | 4131_72_F Inverse va | 11  | -0.43049 | 0.167676 | 0.010247 |
| 4131_72_F finngen_R outcome | 4131_72_F Simple mc  | 11  | -0.97028 | 0.384118 | 0.030077 |
| 4131_72_F finngen_R outcome | 4131_72_F Weighted   | 11  | -0.22579 | 0.226456 | 0.342259 |
| 4133_54_C finngen_R outcome | 4133_54_C Wald ratio | 1   | 0.017869 | 0.452659 | 0.968511 |
| 4141_79_C finngen_R outcome | 4141_79_C MR Egger   | 3   | 1.470869 | 1.853939 | 0.573027 |
| 4141_79_C finngen_R outcome | 4141_79_C Weighted   | 3   | 0.08573  | 0.39056  | 0.826256 |
| 4141_79_C finngen_R outcome | 4141_79_C Inverse va | 3   | 0.218219 | 0.421404 | 0.604571 |
| 4141_79_C finngen_R outcome | 4141_79_C Simple mc  | 3   | 0.006833 | 0.529281 | 0.990872 |
| 4141_79_C finngen_R outcome | 4141_79_C Weighted   | 3   | 0.017428 | 0.439376 | 0.971963 |

|                             |                      |     |          |          |          |
|-----------------------------|----------------------|-----|----------|----------|----------|
| 4145_58_I finngen_R outcome | 4145_58_I MR Egger   | 9   | -0.32842 | 0.599409 | 0.600783 |
| 4145_58_I finngen_R outcome | 4145_58_I Weighted   | 9   | -0.16724 | 0.290854 | 0.565298 |
| 4145_58_I finngen_R outcome | 4145_58_I Inverse va | 9   | -0.24289 | 0.234391 | 0.300085 |
| 4145_58_I finngen_R outcome | 4145_58_I Simple mc  | 9   | -0.11495 | 0.453586 | 0.806333 |
| 4145_58_I finngen_R outcome | 4145_58_I Weighted   | 9   | -0.12362 | 0.339436 | 0.725144 |
| 4151_6_PL finngen_R outcome | 4151_6_PL MR Egger   | 37  | -0.1143  | 0.121301 | 0.352486 |
| 4151_6_PL finngen_R outcome | 4151_6_PL Weighted   | 37  | -0.18    | 0.102381 | 0.078726 |
| 4151_6_PL finngen_R outcome | 4151_6_PL Inverse va | 37  | -0.11642 | 0.068565 | 0.08952  |
| 4151_6_PL finngen_R outcome | 4151_6_PL Simple mc  | 37  | -0.2094  | 0.176576 | 0.24343  |
| 4151_6_PL finngen_R outcome | 4151_6_PL Weighted   | 37  | -0.16496 | 0.117471 | 0.168821 |
| 4152_58_k finngen_R outcome | 4152_58_k MR Egger   | 48  | 0.04607  | 0.097787 | 0.639776 |
| 4152_58_k finngen_R outcome | 4152_58_k Weighted   | 48  | -0.007   | 0.083595 | 0.933296 |
| 4152_58_k finngen_R outcome | 4152_58_k Inverse va | 48  | 0.014577 | 0.060109 | 0.80839  |
| 4152_58_k finngen_R outcome | 4152_58_k Simple mc  | 48  | 0.066068 | 0.159214 | 0.680055 |
| 4152_58_k finngen_R outcome | 4152_58_k Weighted   | 48  | -0.01282 | 0.074816 | 0.864684 |
| 4153_11_S finngen_R outcome | 4153_11_S MR Egger   | 41  | -0.13447 | 0.147112 | 0.366304 |
| 4153_11_S finngen_R outcome | 4153_11_S Weighted   | 41  | -0.0391  | 0.121075 | 0.746766 |
| 4153_11_S finngen_R outcome | 4153_11_S Inverse va | 41  | -0.03061 | 0.080037 | 0.702139 |
| 4153_11_S finngen_R outcome | 4153_11_S Simple mc  | 41  | 0.1148   | 0.209548 | 0.586844 |
| 4153_11_S finngen_R outcome | 4153_11_S Weighted   | 41  | -0.01753 | 0.127226 | 0.891091 |
| 4154_57_S finngen_R outcome | 4154_57_S MR Egger   | 25  | 0.042745 | 0.136913 | 0.757696 |
| 4154_57_S finngen_R outcome | 4154_57_S Weighted   | 25  | 0.167167 | 0.108404 | 0.123057 |
| 4154_57_S finngen_R outcome | 4154_57_S Inverse va | 25  | 0.11427  | 0.081991 | 0.163413 |
| 4154_57_S finngen_R outcome | 4154_57_S Simple mc  | 25  | 0.050357 | 0.200612 | 0.803936 |
| 4154_57_S finngen_R outcome | 4154_57_S Weighted   | 25  | 0.101638 | 0.106501 | 0.349427 |
| 4155_3_TM finngen_R outcome | 4155_3_TM MR Egger   | 134 | 0.045005 | 0.039983 | 0.262377 |
| 4155_3_TM finngen_R outcome | 4155_3_TM Weighted   | 134 | 0.008201 | 0.039794 | 0.836726 |
| 4155_3_TM finngen_R outcome | 4155_3_TM Inverse va | 134 | 0.038021 | 0.024531 | 0.121158 |
| 4155_3_TM finngen_R outcome | 4155_3_TM Simple mc  | 134 | 0.009093 | 0.075634 | 0.904489 |
| 4155_3_TM finngen_R outcome | 4155_3_TM Weighted   | 134 | 0.009093 | 0.035443 | 0.79792  |
| 4157_2_F2 finngen_R outcome | 4157_2_F2 MR Egger   | 6   | 0.108291 | 1.652076 | 0.950883 |
| 4157_2_F2 finngen_R outcome | 4157_2_F2 Weighted   | 6   | -0.71539 | 0.261706 | 0.006265 |
| 4157_2_F2 finngen_R outcome | 4157_2_F2 Inverse va | 6   | -0.65983 | 0.3146   | 0.035961 |
| 4157_2_F2 finngen_R outcome | 4157_2_F2 Simple mc  | 6   | -0.47693 | 0.413017 | 0.300385 |
| 4157_2_F2 finngen_R outcome | 4157_2_F2 Weighted   | 6   | -0.59982 | 0.242441 | 0.056248 |
| 4158_54_F finngen_R outcome | 4158_54_F MR Egger   | 25  | -0.19788 | 0.155072 | 0.214673 |
| 4158_54_F finngen_R outcome | 4158_54_F Weighted   | 25  | -0.25485 | 0.100998 | 0.011624 |
| 4158_54_F finngen_R outcome | 4158_54_F Inverse va | 25  | -0.20564 | 0.071094 | 0.003822 |
| 4158_54_F finngen_R outcome | 4158_54_F Simple mc  | 25  | -0.20632 | 0.142489 | 0.160571 |
| 4158_54_F finngen_R outcome | 4158_54_F Weighted   | 25  | -0.25427 | 0.105894 | 0.02445  |
| 4159_130_ finngen_R outcome | 4159_130_ MR Egger   | 19  | 0.020049 | 0.229951 | 0.93154  |
| 4159_130_ finngen_R outcome | 4159_130_ Weighted   | 19  | -0.07027 | 0.132394 | 0.595587 |
| 4159_130_ finngen_R outcome | 4159_130_ Inverse va | 19  | -0.05035 | 0.101672 | 0.620465 |
| 4159_130_ finngen_R outcome | 4159_130_ Simple mc  | 19  | -0.03948 | 0.217812 | 0.858185 |
| 4159_130_ finngen_R outcome | 4159_130_ Weighted   | 19  | -0.0528  | 0.135964 | 0.702337 |
| 4160_49_I finngen_R outcome | 4160_49_I MR Egger   | 4   | -0.72904 | 1.460881 | 0.667235 |
| 4160_49_I finngen_R outcome | 4160_49_I Weighted   | 4   | 0.469281 | 0.333487 | 0.15937  |
| 4160_49_I finngen_R outcome | 4160_49_I Inverse va | 4   | 0.486083 | 0.280031 | 0.082596 |
| 4160_49_I finngen_R outcome | 4160_49_I Simple mc  | 4   | 0.861403 | 0.463292 | 0.159939 |
| 4160_49_I finngen_R outcome | 4160_49_I Weighted   | 4   | 0.323966 | 0.346967 | 0.419332 |
| 4162_54_T finngen_R outcome | 4162_54_T MR Egger   | 9   | -0.3822  | 0.294189 | 0.235035 |
| 4162_54_T finngen_R outcome | 4162_54_T Weighted   | 9   | -0.00378 | 0.212781 | 0.985842 |
| 4162_54_T finngen_R outcome | 4162_54_T Inverse va | 9   | -0.06131 | 0.151047 | 0.684794 |
| 4162_54_T finngen_R outcome | 4162_54_T Simple mc  | 9   | 0.171445 | 0.339082 | 0.626762 |
| 4162_54_T finngen_R outcome | 4162_54_T Weighted   | 9   | 0.15804  | 0.246344 | 0.539114 |
| 4187_49_F finngen_R outcome | 4187_49_F Wald ratio | 1   | 0.523475 | 0.370234 | 0.15739  |
| 4192_10_f finngen_R outcome | 4192_10_f MR Egger   | 41  | -0.23389 | 0.081403 | 0.006543 |
| 4192_10_f finngen_R outcome | 4192_10_f Weighted   | 41  | -0.19174 | 0.070763 | 0.006737 |

|                             |                      |     |          |          |          |
|-----------------------------|----------------------|-----|----------|----------|----------|
| 4192_10_#finngen_R outcome  | 4192_10_#Inverse va  | 41  | -0.0649  | 0.051769 | 0.209936 |
| 4192_10_#finngen_R outcome  | 4192_10_#Simple mc   | 41  | 0.056365 | 0.119875 | 0.64077  |
| 4192_10_#finngen_R outcome  | 4192_10_#Weighted    | 41  | -0.20366 | 0.065843 | 0.003604 |
| 4220_39_#finngen_R outcome  | 4220_39_#Inverse va  | 2   | 0.443169 | 0.416399 | 0.287198 |
| 4232_19_#finngen_R outcome  | 4232_19_#MR Egger    | 11  | 0.306621 | 0.793247 | 0.708077 |
| 4232_19_#finngen_R outcome  | 4232_19_#Weighted    | 11  | -0.28287 | 0.270438 | 0.29558  |
| 4232_19_#finngen_R outcome  | 4232_19_#Inverse va  | 11  | -0.27382 | 0.207693 | 0.187372 |
| 4232_19_#finngen_R outcome  | 4232_19_#Simple mc   | 11  | -0.39547 | 0.452607 | 0.402741 |
| 4232_19_#finngen_R outcome  | 4232_19_#Weighted    | 11  | -0.31956 | 0.385197 | 0.426119 |
| 4234_8_IL:finngen_R outcome | 4234_8_IL:MR Egger   | 90  | -0.08282 | 0.05271  | 0.119732 |
| 4234_8_IL:finngen_R outcome | 4234_8_IL:Weighted   | 90  | -0.06671 | 0.044408 | 0.133037 |
| 4234_8_IL:finngen_R outcome | 4234_8_IL:Inverse va | 90  | -0.0367  | 0.029461 | 0.212836 |
| 4234_8_IL:finngen_R outcome | 4234_8_IL:Simple mc  | 90  | -0.11598 | 0.073075 | 0.116025 |
| 4234_8_IL:finngen_R outcome | 4234_8_IL:Weighted   | 90  | -0.06534 | 0.040721 | 0.11213  |
| 4278_14_#finngen_R outcome  | 4278_14_#MR Egger    | 4   | 1.376144 | 0.754968 | 0.209912 |
| 4278_14_#finngen_R outcome  | 4278_14_#Weighted    | 4   | 0.247992 | 0.24484  | 0.31112  |
| 4278_14_#finngen_R outcome  | 4278_14_#Inverse va  | 4   | 0.234522 | 0.21887  | 0.283941 |
| 4278_14_#finngen_R outcome  | 4278_14_#Simple mc   | 4   | -0.26214 | 0.489593 | 0.629505 |
| 4278_14_#finngen_R outcome  | 4278_14_#Weighted    | 4   | 0.534367 | 0.287602 | 0.160146 |
| 4294_16_#finngen_R outcome  | 4294_16_#MR Egger    | 3   | -0.52167 | 0.422157 | 0.433123 |
| 4294_16_#finngen_R outcome  | 4294_16_#Weighted    | 3   | -0.0096  | 0.281743 | 0.972824 |
| 4294_16_#finngen_R outcome  | 4294_16_#Inverse va  | 3   | 0.110011 | 0.370916 | 0.766778 |
| 4294_16_#finngen_R outcome  | 4294_16_#Simple mc   | 3   | 0.124468 | 0.560335 | 0.844831 |
| 4294_16_#finngen_R outcome  | 4294_16_#Weighted    | 3   | -0.12876 | 0.283352 | 0.694085 |
| 4324_33_#finngen_R outcome  | 4324_33_#MR Egger    | 86  | 0.024852 | 0.08551  | 0.772053 |
| 4324_33_#finngen_R outcome  | 4324_33_#Weighted    | 86  | -0.02499 | 0.066351 | 0.706478 |
| 4324_33_#finngen_R outcome  | 4324_33_#Inverse va  | 86  | 0.033097 | 0.045693 | 0.468862 |
| 4324_33_#finngen_R outcome  | 4324_33_#Simple mc   | 86  | 0.018593 | 0.113695 | 0.870483 |
| 4324_33_#finngen_R outcome  | 4324_33_#Weighted    | 86  | -0.00984 | 0.069847 | 0.888317 |
| 4328_2_#BCfinngen_R outcome | 4328_2_#BCMR Egger   | 22  | -0.09095 | 0.159141 | 0.574008 |
| 4328_2_#BCfinngen_R outcome | 4328_2_#BCWeighted   | 22  | 0.00224  | 0.124686 | 0.985668 |
| 4328_2_#BCfinngen_R outcome | 4328_2_#BCInverse va | 22  | 0.095697 | 0.091356 | 0.294863 |
| 4328_2_#BCfinngen_R outcome | 4328_2_#BCSimple mc  | 22  | -0.05754 | 0.236257 | 0.80995  |
| 4328_2_#BCfinngen_R outcome | 4328_2_#BCWeighted   | 22  | -0.01264 | 0.126195 | 0.921192 |
| 4337_49_#finngen_R outcome  | 4337_49_#MR Egger    | 11  | 0.38895  | 0.265414 | 0.176842 |
| 4337_49_#finngen_R outcome  | 4337_49_#Weighted    | 11  | 0.378389 | 0.168072 | 0.024364 |
| 4337_49_#finngen_R outcome  | 4337_49_#Inverse va  | 11  | 0.330711 | 0.119965 | 0.005838 |
| 4337_49_#finngen_R outcome  | 4337_49_#Simple mc   | 11  | 0.335469 | 0.257656 | 0.222105 |
| 4337_49_#finngen_R outcome  | 4337_49_#Weighted    | 11  | 0.335469 | 0.190791 | 0.109202 |
| 4342_10_#finngen_R outcome  | 4342_10_#MR Egger    | 136 | -0.02195 | 0.0288   | 0.447373 |
| 4342_10_#finngen_R outcome  | 4342_10_#Weighted    | 136 | -0.03151 | 0.029897 | 0.291873 |
| 4342_10_#finngen_R outcome  | 4342_10_#Inverse va  | 136 | -0.03188 | 0.018181 | 0.079505 |
| 4342_10_#finngen_R outcome  | 4342_10_#Simple mc   | 136 | -0.04015 | 0.058178 | 0.491355 |
| 4342_10_#finngen_R outcome  | 4342_10_#Weighted    | 136 | -0.04015 | 0.025662 | 0.120071 |
| 4355_13_#finngen_R outcome  | 4355_13_#MR Egger    | 22  | 0.241114 | 0.171286 | 0.174583 |
| 4355_13_#finngen_R outcome  | 4355_13_#Weighted    | 22  | 0.092197 | 0.122727 | 0.452511 |
| 4355_13_#finngen_R outcome  | 4355_13_#Inverse va  | 22  | -0.00457 | 0.086014 | 0.957661 |
| 4355_13_#finngen_R outcome  | 4355_13_#Simple mc   | 22  | 0.118922 | 0.242505 | 0.628943 |
| 4355_13_#finngen_R outcome  | 4355_13_#Weighted    | 22  | 0.118922 | 0.126557 | 0.358069 |
| 4374_45_#finngen_R outcome  | 4374_45_#MR Egger    | 64  | 0.053148 | 0.073052 | 0.469634 |
| 4374_45_#finngen_R outcome  | 4374_45_#Weighted    | 64  | -0.10263 | 0.067435 | 0.128039 |
| 4374_45_#finngen_R outcome  | 4374_45_#Inverse va  | 64  | -0.05371 | 0.042738 | 0.208821 |
| 4374_45_#finngen_R outcome  | 4374_45_#Simple mc   | 64  | -0.15266 | 0.132459 | 0.253476 |
| 4374_45_#finngen_R outcome  | 4374_45_#Weighted    | 64  | -0.07914 | 0.069639 | 0.260078 |
| 4407_10_#finngen_R outcome  | 4407_10_#MR Egger    | 52  | -0.06962 | 0.055607 | 0.216386 |
| 4407_10_#finngen_R outcome  | 4407_10_#Weighted    | 52  | -0.01763 | 0.032848 | 0.591452 |
| 4407_10_#finngen_R outcome  | 4407_10_#Inverse va  | 52  | -0.01737 | 0.022137 | 0.43272  |
| 4407_10_#finngen_R outcome  | 4407_10_#Simple mc   | 52  | -0.04836 | 0.048954 | 0.327928 |

|                             |                      |     |          |          |          |
|-----------------------------|----------------------|-----|----------|----------|----------|
| 4407_10_M finngen_R outcome | 4407_10_M Weighted   | 52  | -0.02702 | 0.037569 | 0.4753   |
| 4413_3_SL finngen_R outcome | 4413_3_SL MR Egger   | 6   | -0.55947 | 1.448617 | 0.719006 |
| 4413_3_SL finngen_R outcome | 4413_3_SL Weighted   | 6   | 0.193891 | 0.334309 | 0.561932 |
| 4413_3_SL finngen_R outcome | 4413_3_SL Inverse va | 6   | -0.04964 | 0.333288 | 0.881603 |
| 4413_3_SL finngen_R outcome | 4413_3_SL Simple mc  | 6   | 0.261674 | 0.533672 | 0.64466  |
| 4413_3_SL finngen_R outcome | 4413_3_SL Weighted   | 6   | 0.347254 | 0.607569 | 0.592362 |
| 4435_66_E finngen_R outcome | 4435_66_E MR Egger   | 136 | -0.07252 | 0.0331   | 0.030194 |
| 4435_66_E finngen_R outcome | 4435_66_E Weighted   | 136 | -0.03744 | 0.035473 | 0.291243 |
| 4435_66_E finngen_R outcome | 4435_66_E Inverse va | 136 | -0.05754 | 0.023333 | 0.013668 |
| 4435_66_E finngen_R outcome | 4435_66_E Simple mc  | 136 | -0.07393 | 0.076306 | 0.334339 |
| 4435_66_E finngen_R outcome | 4435_66_E Weighted   | 136 | -0.05372 | 0.030878 | 0.084179 |
| 4440_15_F finngen_R outcome | 4440_15_F MR Egger   | 108 | 0.029505 | 0.086875 | 0.73481  |
| 4440_15_F finngen_R outcome | 4440_15_F Weighted   | 108 | -0.10763 | 0.062553 | 0.085331 |
| 4440_15_F finngen_R outcome | 4440_15_F Inverse va | 108 | -0.11858 | 0.040351 | 0.003295 |
| 4440_15_F finngen_R outcome | 4440_15_F Simple mc  | 108 | -0.36477 | 0.130465 | 0.006137 |
| 4440_15_F finngen_R outcome | 4440_15_F Weighted   | 108 | -0.10935 | 0.080161 | 0.175387 |
| 4455_89_M finngen_R outcome | 4455_89_M MR Egger   | 26  | -0.17689 | 0.230529 | 0.450382 |
| 4455_89_M finngen_R outcome | 4455_89_M Weighted   | 26  | 0.046805 | 0.14008  | 0.738282 |
| 4455_89_M finngen_R outcome | 4455_89_M Inverse va | 26  | 0.020086 | 0.111277 | 0.856759 |
| 4455_89_M finngen_R outcome | 4455_89_M Simple mc  | 26  | 0.028336 | 0.25001  | 0.910667 |
| 4455_89_M finngen_R outcome | 4455_89_M Weighted   | 26  | 0.015781 | 0.136757 | 0.909052 |
| 4459_68_F finngen_R outcome | 4459_68_F MR Egger   | 166 | 0.049956 | 0.044524 | 0.263499 |
| 4459_68_F finngen_R outcome | 4459_68_F Weighted   | 166 | 0.020633 | 0.044094 | 0.639834 |
| 4459_68_F finngen_R outcome | 4459_68_F Inverse va | 166 | -0.00335 | 0.027847 | 0.904179 |
| 4459_68_F finngen_R outcome | 4459_68_F Simple mc  | 166 | -0.13924 | 0.090517 | 0.125884 |
| 4459_68_F finngen_R outcome | 4459_68_F Weighted   | 166 | 0.002931 | 0.04342  | 0.946259 |
| 4464_10_S finngen_R outcome | 4464_10_S MR Egger   | 3   | -0.4343  | 1.451548 | 0.81492  |
| 4464_10_S finngen_R outcome | 4464_10_S Weighted   | 3   | 0.820056 | 0.576145 | 0.154635 |
| 4464_10_S finngen_R outcome | 4464_10_S Inverse va | 3   | 0.954041 | 0.445972 | 0.032416 |
| 4464_10_S finngen_R outcome | 4464_10_S Simple mc  | 3   | 0.682939 | 0.652744 | 0.405252 |
| 4464_10_S finngen_R outcome | 4464_10_S Weighted   | 3   | 0.69772  | 0.658217 | 0.400233 |
| 4467_49_S finngen_R outcome | 4467_49_S MR Egger   | 82  | -0.07046 | 0.061593 | 0.256039 |
| 4467_49_S finngen_R outcome | 4467_49_S Weighted   | 82  | -0.11019 | 0.053266 | 0.038578 |
| 4467_49_S finngen_R outcome | 4467_49_S Inverse va | 82  | -0.05435 | 0.033498 | 0.104731 |
| 4467_49_S finngen_R outcome | 4467_49_S Simple mc  | 82  | -0.12272 | 0.097331 | 0.210993 |
| 4467_49_S finngen_R outcome | 4467_49_S Weighted   | 82  | -0.12272 | 0.053578 | 0.024595 |
| 4471_50_T finngen_R outcome | 4471_50_T MR Egger   | 35  | 0.113637 | 0.120309 | 0.351755 |
| 4471_50_T finngen_R outcome | 4471_50_T Weighted   | 35  | 0.037096 | 0.098457 | 0.706345 |
| 4471_50_T finngen_R outcome | 4471_50_T Inverse va | 35  | -0.0168  | 0.064755 | 0.795315 |
| 4471_50_T finngen_R outcome | 4471_50_T Simple mc  | 35  | 0.094317 | 0.169945 | 0.582539 |
| 4471_50_T finngen_R outcome | 4471_50_T Weighted   | 35  | 0.073453 | 0.090003 | 0.420114 |
| 4479_14_S finngen_R outcome | 4479_14_S MR Egger   | 64  | 0.007383 | 0.068607 | 0.914644 |
| 4479_14_S finngen_R outcome | 4479_14_S Weighted   | 64  | 0.010413 | 0.052435 | 0.84259  |
| 4479_14_S finngen_R outcome | 4479_14_S Inverse va | 64  | 0.020304 | 0.035423 | 0.566511 |
| 4479_14_S finngen_R outcome | 4479_14_S Simple mc  | 64  | -0.0279  | 0.081583 | 0.733536 |
| 4479_14_S finngen_R outcome | 4479_14_S Weighted   | 64  | 0.011451 | 0.05011  | 0.819991 |
| 4480_59_C finngen_R outcome | 4480_59_C Wald ratio | 1   | -0.61512 | 0.435393 | 0.157715 |
| 4498_62_I finngen_R outcome | 4498_62_I MR Egger   | 40  | 0.11081  | 0.1278   | 0.391352 |
| 4498_62_I finngen_R outcome | 4498_62_I Weighted   | 40  | 0.059237 | 0.096492 | 0.539277 |
| 4498_62_I finngen_R outcome | 4498_62_I Inverse va | 40  | 0.030987 | 0.065039 | 0.633764 |
| 4498_62_I finngen_R outcome | 4498_62_I Simple mc  | 40  | -0.08272 | 0.165597 | 0.620213 |
| 4498_62_I finngen_R outcome | 4498_62_I Weighted   | 40  | 0.070921 | 0.099314 | 0.479413 |
| 4499_21_F finngen_R outcome | 4499_21_F MR Egger   | 3   | -1.715   | 1.155541 | 0.377462 |
| 4499_21_F finngen_R outcome | 4499_21_F Weighted   | 3   | -0.37936 | 0.295251 | 0.19884  |
| 4499_21_F finngen_R outcome | 4499_21_F Inverse va | 3   | -0.3179  | 0.352413 | 0.367016 |
| 4499_21_F finngen_R outcome | 4499_21_F Simple mc  | 3   | -0.13253 | 0.657685 | 0.85894  |
| 4499_21_F finngen_R outcome | 4499_21_F Weighted   | 3   | -0.41018 | 0.275272 | 0.274671 |
| 4500_50_C finngen_R outcome | 4500_50_C MR Egger   | 20  | 0.428006 | 0.374433 | 0.267982 |

|                             |                      |     |          |          |          |
|-----------------------------|----------------------|-----|----------|----------|----------|
| 4500_50_C finngen_R outcome | 4500_50_C Weighted   | 20  | 0.088868 | 0.200822 | 0.658113 |
| 4500_50_C finngen_R outcome | 4500_50_C Inverse va | 20  | 0.271688 | 0.17585  | 0.122346 |
| 4500_50_C finngen_R outcome | 4500_50_C Simple mc  | 20  | 0.302739 | 0.352495 | 0.401131 |
| 4500_50_C finngen_R outcome | 4500_50_C Weighted   | 20  | 0.052767 | 0.229311 | 0.820465 |
| 4534_10_F finngen_R outcome | 4534_10_F MR Egger   | 19  | 0.140929 | 0.209028 | 0.509241 |
| 4534_10_F finngen_R outcome | 4534_10_F Weighted   | 19  | -0.00512 | 0.143685 | 0.971579 |
| 4534_10_F finngen_R outcome | 4534_10_F Inverse va | 19  | -0.07358 | 0.104295 | 0.480518 |
| 4534_10_F finngen_R outcome | 4534_10_F Simple mc  | 19  | 0.048641 | 0.237116 | 0.839767 |
| 4534_10_F finngen_R outcome | 4534_10_F Weighted   | 19  | 0.017823 | 0.146822 | 0.904728 |
| 4535_50_E finngen_R outcome | 4535_50_E MR Egger   | 169 | -0.02372 | 0.032034 | 0.459964 |
| 4535_50_E finngen_R outcome | 4535_50_E Weighted   | 169 | -0.01435 | 0.030125 | 0.633863 |
| 4535_50_E finngen_R outcome | 4535_50_E Inverse va | 169 | -0.0215  | 0.020255 | 0.288385 |
| 4535_50_E finngen_R outcome | 4535_50_E Simple mc  | 169 | -0.00735 | 0.05935  | 0.901586 |
| 4535_50_E finngen_R outcome | 4535_50_E Weighted   | 169 | -0.03491 | 0.028395 | 0.220683 |
| 4559_64_k finngen_R outcome | 4559_64_k MR Egger   | 44  | 0.156551 | 0.13127  | 0.239725 |
| 4559_64_k finngen_R outcome | 4559_64_k Weighted   | 44  | 0.050444 | 0.089463 | 0.572853 |
| 4559_64_k finngen_R outcome | 4559_64_k Inverse va | 44  | -0.02833 | 0.075817 | 0.708696 |
| 4559_64_k finngen_R outcome | 4559_64_k Simple mc  | 44  | 0.170946 | 0.17695  | 0.339411 |
| 4559_64_k finngen_R outcome | 4559_64_k Weighted   | 44  | 0.088168 | 0.088665 | 0.325591 |
| 4564_2_PL finngen_R outcome | 4564_2_PL MR Egger   | 119 | 0.032942 | 0.036387 | 0.367159 |
| 4564_2_PL finngen_R outcome | 4564_2_PL Weighted   | 119 | 0.083143 | 0.040253 | 0.038876 |
| 4564_2_PL finngen_R outcome | 4564_2_PL Inverse va | 119 | 0.081535 | 0.02583  | 0.001596 |
| 4564_2_PL finngen_R outcome | 4564_2_PL Simple mc  | 119 | 0.110504 | 0.087787 | 0.210595 |
| 4564_2_PL finngen_R outcome | 4564_2_PL Weighted   | 119 | 0.038914 | 0.03431  | 0.259018 |
| 4721_54_T finngen_R outcome | 4721_54_T MR Egger   | 7   | 0.315262 | 0.532785 | 0.579775 |
| 4721_54_T finngen_R outcome | 4721_54_T Weighted   | 7   | -0.03805 | 0.269515 | 0.887732 |
| 4721_54_T finngen_R outcome | 4721_54_T Inverse va | 7   | -0.06684 | 0.225266 | 0.766679 |
| 4721_54_T finngen_R outcome | 4721_54_T Simple mc  | 7   | -0.08404 | 0.364745 | 0.825428 |
| 4721_54_T finngen_R outcome | 4721_54_T Weighted   | 7   | 0.063698 | 0.342064 | 0.858412 |
| 4763_31_f finngen_R outcome | 4763_31_f MR Egger   | 6   | 0.071356 | 0.219588 | 0.761501 |
| 4763_31_f finngen_R outcome | 4763_31_f Weighted   | 6   | -0.00703 | 0.171452 | 0.967305 |
| 4763_31_f finngen_R outcome | 4763_31_f Inverse va | 6   | -0.03473 | 0.14941  | 0.816201 |
| 4763_31_f finngen_R outcome | 4763_31_f Simple mc  | 6   | -0.01354 | 0.25653  | 0.959946 |
| 4763_31_f finngen_R outcome | 4763_31_f Weighted   | 6   | -0.00875 | 0.18314  | 0.963738 |
| 4771_10_ξ finngen_R outcome | 4771_10_ξ MR Egger   | 10  | -0.30215 | 0.203053 | 0.175057 |
| 4771_10_ξ finngen_R outcome | 4771_10_ξ Weighted   | 10  | -0.19203 | 0.129613 | 0.138447 |
| 4771_10_ξ finngen_R outcome | 4771_10_ξ Inverse va | 10  | -0.14093 | 0.110633 | 0.202713 |
| 4771_10_ξ finngen_R outcome | 4771_10_ξ Simple mc  | 10  | -0.16719 | 0.200822 | 0.426637 |
| 4771_10_ξ finngen_R outcome | 4771_10_ξ Weighted   | 10  | -0.16719 | 0.122954 | 0.206977 |
| 4775_34_C finngen_R outcome | 4775_34_C MR Egger   | 17  | 0.018674 | 0.190722 | 0.923296 |
| 4775_34_C finngen_R outcome | 4775_34_C Weighted   | 17  | -0.05955 | 0.142891 | 0.676837 |
| 4775_34_C finngen_R outcome | 4775_34_C Inverse va | 17  | 0.063643 | 0.112036 | 0.569994 |
| 4775_34_C finngen_R outcome | 4775_34_C Simple mc  | 17  | 0.181171 | 0.244945 | 0.470233 |
| 4775_34_C finngen_R outcome | 4775_34_C Weighted   | 17  | -0.06314 | 0.159392 | 0.697256 |
| 4801_13_L finngen_R outcome | 4801_13_L MR Egger   | 17  | 0.213246 | 0.19358  | 0.288002 |
| 4801_13_L finngen_R outcome | 4801_13_L Weighted   | 17  | 0.192833 | 0.108955 | 0.076756 |
| 4801_13_L finngen_R outcome | 4801_13_L Inverse va | 17  | 0.092982 | 0.092605 | 0.315343 |
| 4801_13_L finngen_R outcome | 4801_13_L Simple mc  | 17  | 0.266424 | 0.198331 | 0.197909 |
| 4801_13_L finngen_R outcome | 4801_13_L Weighted   | 17  | 0.183898 | 0.09971  | 0.083733 |
| 4811_33_l finngen_R outcome | 4811_33_l MR Egger   | 8   | 0.500457 | 0.756412 | 0.532786 |
| 4811_33_l finngen_R outcome | 4811_33_l Weighted   | 8   | -0.10671 | 0.255338 | 0.676002 |
| 4811_33_l finngen_R outcome | 4811_33_l Inverse va | 8   | 0.028438 | 0.190404 | 0.881274 |
| 4811_33_l finngen_R outcome | 4811_33_l Simple mc  | 8   | -0.2055  | 0.390917 | 0.615338 |
| 4811_33_l finngen_R outcome | 4811_33_l Weighted   | 8   | -0.26504 | 0.352621 | 0.476774 |
| 4831_4_SE finngen_R outcome | 4831_4_SE MR Egger   | 58  | 0.066807 | 0.104896 | 0.526795 |
| 4831_4_SE finngen_R outcome | 4831_4_SE Weighted   | 58  | 0.056386 | 0.083692 | 0.500483 |
| 4831_4_SE finngen_R outcome | 4831_4_SE Inverse va | 58  | 0.090885 | 0.054277 | 0.094036 |
| 4831_4_SE finngen_R outcome | 4831_4_SE Simple mc  | 58  | 0.051854 | 0.152258 | 0.734681 |

|                              |                       |     |          |          |          |
|------------------------------|-----------------------|-----|----------|----------|----------|
| 4831_4_SE finngen_R outcome  | 4831_4_SE Weighted    | 58  | 0.074396 | 0.077104 | 0.338681 |
| 4834_61_E finngen_R outcome  | 4834_61_E MR Egger    | 26  | -0.0399  | 0.205004 | 0.847312 |
| 4834_61_E finngen_R outcome  | 4834_61_E Weighted    | 26  | -0.0152  | 0.14267  | 0.915153 |
| 4834_61_E finngen_R outcome  | 4834_61_E Inverse va  | 26  | 0.005776 | 0.099414 | 0.953671 |
| 4834_61_E finngen_R outcome  | 4834_61_E Simple mc   | 26  | 0.100576 | 0.266215 | 0.708767 |
| 4834_61_E finngen_R outcome  | 4834_61_E Weighted    | 26  | -0.06163 | 0.225606 | 0.786954 |
| 4866_59_I finngen_R outcome  | 4866_59_I Wald ratio  | 1   | 0.476878 | 0.588786 | 0.417978 |
| 4867_15_I finngen_R outcome  | 4867_15_I MR Egger    | 74  | -0.27048 | 0.121179 | 0.028721 |
| 4867_15_I finngen_R outcome  | 4867_15_I Weighted    | 74  | -0.25989 | 0.084699 | 0.002152 |
| 4867_15_I finngen_R outcome  | 4867_15_I Inverse va  | 74  | -0.17221 | 0.065774 | 0.008839 |
| 4867_15_I finngen_R outcome  | 4867_15_I Simple mc   | 74  | -0.22053 | 0.172674 | 0.205596 |
| 4867_15_I finngen_R outcome  | 4867_15_I Weighted    | 74  | -0.31737 | 0.094304 | 0.001221 |
| 4874_3_AI finngen_R outcome  | 4874_3_AI MR Egger    | 107 | -0.03147 | 0.058325 | 0.590644 |
| 4874_3_AI finngen_R outcome  | 4874_3_AI Weighted    | 107 | -0.14081 | 0.054531 | 0.009814 |
| 4874_3_AI finngen_R outcome  | 4874_3_AI Inverse va  | 107 | -0.08538 | 0.035969 | 0.017612 |
| 4874_3_AI finngen_R outcome  | 4874_3_AI Simple mc   | 107 | -0.15752 | 0.104277 | 0.133867 |
| 4874_3_AI finngen_R outcome  | 4874_3_AI Weighted    | 107 | -0.14717 | 0.054925 | 0.008551 |
| 4878_3_F1 finngen_R outcome  | 4878_3_F1 MR Egger    | 12  | 0.404633 | 0.284218 | 0.184986 |
| 4878_3_F1 finngen_R outcome  | 4878_3_F1 Weighted    | 12  | 0.122884 | 0.187819 | 0.51294  |
| 4878_3_F1 finngen_R outcome  | 4878_3_F1 Inverse va  | 12  | 0.083988 | 0.14993  | 0.575357 |
| 4878_3_F1 finngen_R outcome  | 4878_3_F1 Simple mc   | 12  | 0.081753 | 0.291404 | 0.784263 |
| 4878_3_F1 finngen_R outcome  | 4878_3_F1 Weighted    | 12  | 0.143852 | 0.210589 | 0.508681 |
| 4886_3_CI finngen_R outcome  | 4886_3_CI MR Egger    | 72  | -0.06201 | 0.05916  | 0.298174 |
| 4886_3_CI finngen_R outcome  | 4886_3_CI Weighted    | 72  | -0.09797 | 0.057887 | 0.090571 |
| 4886_3_CI finngen_R outcome  | 4886_3_CI Inverse va  | 72  | -0.0987  | 0.040202 | 0.01408  |
| 4886_3_CI finngen_R outcome  | 4886_3_CI Simple mc   | 72  | -0.04463 | 0.109081 | 0.683665 |
| 4886_3_CI finngen_R outcome  | 4886_3_CI Weighted    | 72  | -0.09478 | 0.053351 | 0.07993  |
| 4900_8_CI finngen_R outcome  | 4900_8_CI Wald ratio  | 1   | 0.735176 | 0.539897 | 0.173294 |
| 4906_35_F finngen_R outcome  | 4906_35_F MR Egger    | 36  | -0.04384 | 0.106068 | 0.681943 |
| 4906_35_F finngen_R outcome  | 4906_35_F Weighted    | 36  | 0.003562 | 0.101197 | 0.971921 |
| 4906_35_F finngen_R outcome  | 4906_35_F Inverse va  | 36  | 0.013529 | 0.06642  | 0.838598 |
| 4906_35_F finngen_R outcome  | 4906_35_F Simple mc   | 36  | 0.242625 | 0.197883 | 0.228344 |
| 4906_35_F finngen_R outcome  | 4906_35_F Weighted    | 36  | 0.003488 | 0.085079 | 0.967535 |
| 4908_6_EN finngen_R outcome  | 4908_6_EN MR Egger    | 17  | 0.070339 | 0.191699 | 0.718801 |
| 4908_6_EN finngen_R outcome  | 4908_6_EN Weighted    | 17  | 0.126522 | 0.126925 | 0.31885  |
| 4908_6_EN finngen_R outcome  | 4908_6_EN Inverse va  | 17  | 0.193838 | 0.105699 | 0.066675 |
| 4908_6_EN finngen_R outcome  | 4908_6_EN Simple mc   | 17  | -0.26844 | 0.266813 | 0.329337 |
| 4908_6_EN finngen_R outcome  | 4908_6_EN Weighted    | 17  | 0.146988 | 0.131095 | 0.278737 |
| 4911_49_CI finngen_R outcome | 4911_49_CI MR Egger   | 10  | -0.66472 | 0.380236 | 0.118562 |
| 4911_49_CI finngen_R outcome | 4911_49_CI Weighted   | 10  | -0.37384 | 0.189107 | 0.048056 |
| 4911_49_CI finngen_R outcome | 4911_49_CI Inverse va | 10  | -0.41632 | 0.145641 | 0.004256 |
| 4911_49_CI finngen_R outcome | 4911_49_CI Simple mc  | 10  | -0.34412 | 0.252819 | 0.206572 |
| 4911_49_CI finngen_R outcome | 4911_49_CI Weighted   | 10  | -0.34929 | 0.235606 | 0.172355 |
| 4913_78_CI finngen_R outcome | 4913_78_CI MR Egger   | 79  | -0.04251 | 0.06133  | 0.490274 |
| 4913_78_CI finngen_R outcome | 4913_78_CI Weighted   | 79  | -0.07948 | 0.063431 | 0.21021  |
| 4913_78_CI finngen_R outcome | 4913_78_CI Inverse va | 79  | 0.019509 | 0.03938  | 0.620317 |
| 4913_78_CI finngen_R outcome | 4913_78_CI Simple mc  | 79  | -0.07613 | 0.137853 | 0.582377 |
| 4913_78_CI finngen_R outcome | 4913_78_CI Weighted   | 79  | -0.13369 | 0.068068 | 0.053081 |
| 4920_10_LI finngen_R outcome | 4920_10_LI MR Egger   | 94  | 0.026166 | 0.074073 | 0.724718 |
| 4920_10_LI finngen_R outcome | 4920_10_LI Weighted   | 94  | -0.00034 | 0.066185 | 0.995957 |
| 4920_10_LI finngen_R outcome | 4920_10_LI Inverse va | 94  | 0.061643 | 0.04025  | 0.125642 |
| 4920_10_LI finngen_R outcome | 4920_10_LI Simple mc  | 94  | -0.02109 | 0.136259 | 0.877318 |
| 4920_10_LI finngen_R outcome | 4920_10_LI Weighted   | 94  | 0.018002 | 0.059688 | 0.763631 |
| 4922_13_CI finngen_R outcome | 4922_13_CI Wald ratio | 1   | -0.40967 | 0.748803 | 0.584313 |
| 4924_32_I finngen_R outcome  | 4924_32_I MR Egger    | 120 | 0.134173 | 0.058827 | 0.024354 |
| 4924_32_I finngen_R outcome  | 4924_32_I Weighted    | 120 | 0.044887 | 0.048898 | 0.35863  |
| 4924_32_I finngen_R outcome  | 4924_32_I Inverse va  | 120 | 0.019272 | 0.031494 | 0.54059  |
| 4924_32_I finngen_R outcome  | 4924_32_I Simple mc   | 120 | -0.06951 | 0.106991 | 0.517123 |



|           |                   |           |            |     |          |          |          |
|-----------|-------------------|-----------|------------|-----|----------|----------|----------|
| 4924_32_M | finngen_R outcome | 4924_32_M | Weighted   | 120 | 0.030412 | 0.065166 | 0.641583 |
| 4925_54_M | finngen_R outcome | 4925_54_M | Wald ratio | 1   | -0.34303 | 0.59061  | 0.561368 |
| 4929_55_S | finngen_R outcome | 4929_55_S | MR Egger   | 17  | 0.052982 | 0.313603 | 0.868097 |
| 4929_55_S | finngen_R outcome | 4929_55_S | Weighted   | 17  | 0.047256 | 0.14842  | 0.750189 |
| 4929_55_S | finngen_R outcome | 4929_55_S | Inverse va | 17  | 0.018492 | 0.106616 | 0.862305 |
| 4929_55_S | finngen_R outcome | 4929_55_S | Simple mc  | 17  | 0.053046 | 0.227183 | 0.818339 |
| 4929_55_S | finngen_R outcome | 4929_55_S | Weighted   | 17  | 0.050044 | 0.171212 | 0.77382  |
| 4930_21_S | finngen_R outcome | 4930_21_S | MR Egger   | 6   | -0.091   | 0.614005 | 0.889356 |
| 4930_21_S | finngen_R outcome | 4930_21_S | Weighted   | 6   | 0.075343 | 0.334323 | 0.8217   |
| 4930_21_S | finngen_R outcome | 4930_21_S | Inverse va | 6   | 0.267942 | 0.268541 | 0.31839  |
| 4930_21_S | finngen_R outcome | 4930_21_S | Simple mc  | 6   | 0.946279 | 0.54052  | 0.140399 |
| 4930_21_S | finngen_R outcome | 4930_21_S | Weighted   | 6   | -0.11519 | 0.404632 | 0.787312 |
| 4960_72_F | finngen_R outcome | 4960_72_F | MR Egger   | 4   | -0.13783 | 0.345573 | 0.728557 |
| 4960_72_F | finngen_R outcome | 4960_72_F | Weighted   | 4   | -0.29332 | 0.232363 | 0.206828 |
| 4960_72_F | finngen_R outcome | 4960_72_F | Inverse va | 4   | -0.31142 | 0.207252 | 0.132944 |
| 4960_72_F | finngen_R outcome | 4960_72_F | Simple mc  | 4   | -0.25914 | 0.332403 | 0.49248  |
| 4960_72_F | finngen_R outcome | 4960_72_F | Weighted   | 4   | -0.28133 | 0.251443 | 0.344718 |
| 4961_17_F | finngen_R outcome | 4961_17_F | MR Egger   | 80  | 0.062743 | 0.06665  | 0.349418 |
| 4961_17_F | finngen_R outcome | 4961_17_F | Weighted   | 80  | 7.71E-05 | 0.063591 | 0.999033 |
| 4961_17_F | finngen_R outcome | 4961_17_F | Inverse va | 80  | 0.0422   | 0.038656 | 0.274975 |
| 4961_17_F | finngen_R outcome | 4961_17_F | Simple mc  | 80  | 0.020316 | 0.125448 | 0.871762 |
| 4961_17_F | finngen_R outcome | 4961_17_F | Weighted   | 80  | 0.01251  | 0.057981 | 0.829731 |
| 4962_52_C | finngen_R outcome | 4962_52_C | MR Egger   | 34  | -0.1212  | 0.115988 | 0.303894 |
| 4962_52_C | finngen_R outcome | 4962_52_C | Weighted   | 34  | -0.07261 | 0.098892 | 0.462806 |
| 4962_52_C | finngen_R outcome | 4962_52_C | Inverse va | 34  | -0.02335 | 0.079122 | 0.767935 |
| 4962_52_C | finngen_R outcome | 4962_52_C | Simple mc  | 34  | 0.082662 | 0.244107 | 0.737034 |
| 4962_52_C | finngen_R outcome | 4962_52_C | Weighted   | 34  | -0.08304 | 0.105119 | 0.435213 |
| 4964_67_E | finngen_R outcome | 4964_67_E | MR Egger   | 138 | -0.00254 | 0.025458 | 0.92053  |
| 4964_67_E | finngen_R outcome | 4964_67_E | Weighted   | 138 | -0.00535 | 0.023816 | 0.82234  |
| 4964_67_E | finngen_R outcome | 4964_67_E | Inverse va | 138 | -0.0015  | 0.015701 | 0.923824 |
| 4964_67_E | finngen_R outcome | 4964_67_E | Simple mc  | 138 | 0.006434 | 0.046636 | 0.890471 |
| 4964_67_E | finngen_R outcome | 4964_67_E | Weighted   | 138 | -0.00334 | 0.022065 | 0.879881 |
| 4969_2_C  | finngen_R outcome | 4969_2_C  | MR Egger   | 9   | 0.106021 | 0.221886 | 0.647339 |
| 4969_2_C  | finngen_R outcome | 4969_2_C  | Weighted   | 9   | 0.17805  | 0.170064 | 0.29512  |
| 4969_2_C  | finngen_R outcome | 4969_2_C  | Inverse va | 9   | 0.124528 | 0.12772  | 0.329556 |
| 4969_2_C  | finngen_R outcome | 4969_2_C  | Simple mc  | 9   | 0.2679   | 0.256826 | 0.327388 |
| 4969_2_C  | finngen_R outcome | 4969_2_C  | Weighted   | 9   | 0.164091 | 0.236395 | 0.507247 |
| 4971_1_C  | finngen_R outcome | 4971_1_C  | MR Egger   | 28  | -0.06496 | 0.106367 | 0.546719 |
| 4971_1_C  | finngen_R outcome | 4971_1_C  | Weighted   | 28  | -0.01    | 0.100962 | 0.921117 |
| 4971_1_C  | finngen_R outcome | 4971_1_C  | Inverse va | 28  | -0.05461 | 0.073094 | 0.455014 |
| 4971_1_C  | finngen_R outcome | 4971_1_C  | Simple mc  | 28  | 0.008939 | 0.150234 | 0.95299  |
| 4971_1_C  | finngen_R outcome | 4971_1_C  | Weighted   | 28  | -0.00949 | 0.099248 | 0.924512 |
| 4979_34_I | finngen_R outcome | 4979_34_I | MR Egger   | 70  | -0.13232 | 0.070228 | 0.063826 |
| 4979_34_I | finngen_R outcome | 4979_34_I | Weighted   | 70  | -0.1471  | 0.069051 | 0.033143 |
| 4979_34_I | finngen_R outcome | 4979_34_I | Inverse va | 70  | -0.07558 | 0.043385 | 0.081484 |
| 4979_34_I | finngen_R outcome | 4979_34_I | Simple mc  | 70  | -0.01306 | 0.116819 | 0.911276 |
| 4979_34_I | finngen_R outcome | 4979_34_I | Weighted   | 70  | -0.13075 | 0.067723 | 0.05764  |
| 4982_54_F | finngen_R outcome | 4982_54_F | MR Egger   | 24  | -0.20601 | 0.145543 | 0.170941 |
| 4982_54_F | finngen_R outcome | 4982_54_F | Weighted   | 24  | -0.0863  | 0.118303 | 0.465702 |
| 4982_54_F | finngen_R outcome | 4982_54_F | Inverse va | 24  | -0.09168 | 0.079909 | 0.251238 |
| 4982_54_F | finngen_R outcome | 4982_54_F | Simple mc  | 24  | 0.105492 | 0.21457  | 0.627632 |
| 4982_54_F | finngen_R outcome | 4982_54_F | Weighted   | 24  | -0.17799 | 0.125616 | 0.169914 |
| 4989_7_FC | finngen_R outcome | 4989_7_FC | MR Egger   | 5   | -0.30062 | 0.397178 | 0.504129 |
| 4989_7_FC | finngen_R outcome | 4989_7_FC | Weighted   | 5   | -0.39182 | 0.223055 | 0.078988 |
| 4989_7_FC | finngen_R outcome | 4989_7_FC | Inverse va | 5   | -0.34719 | 0.201808 | 0.08536  |
| 4989_7_FC | finngen_R outcome | 4989_7_FC | Simple mc  | 5   | -0.40847 | 0.324457 | 0.276513 |
| 4989_7_FC | finngen_R outcome | 4989_7_FC | Weighted   | 5   | -0.39301 | 0.23595  | 0.171111 |
| 4990_87_C | finngen_R outcome | 4990_87_C | MR Egger   | 17  | -0.37363 | 0.196417 | 0.076521 |

|                             |                      |     |          |          |          |
|-----------------------------|----------------------|-----|----------|----------|----------|
| 4990_87_C finngen_R outcome | 4990_87_C Weighted   | 17  | -0.12068 | 0.170518 | 0.479122 |
| 4990_87_C finngen_R outcome | 4990_87_C Inverse va | 17  | -0.08476 | 0.111073 | 0.445401 |
| 4990_87_C finngen_R outcome | 4990_87_C Simple mc  | 17  | 0.070714 | 0.302149 | 0.817924 |
| 4990_87_C finngen_R outcome | 4990_87_C Weighted   | 17  | -0.27099 | 0.173512 | 0.137897 |
| 4991_12_C finngen_R outcome | 4991_12_C MR Egger   | 121 | -0.05388 | 0.054507 | 0.324921 |
| 4991_12_C finngen_R outcome | 4991_12_C Weighted   | 121 | -0.01473 | 0.057247 | 0.796956 |
| 4991_12_C finngen_R outcome | 4991_12_C Inverse va | 121 | -0.00744 | 0.033369 | 0.823527 |
| 4991_12_C finngen_R outcome | 4991_12_C Simple mc  | 121 | -0.04163 | 0.090562 | 0.646574 |
| 4991_12_C finngen_R outcome | 4991_12_C Weighted   | 121 | -0.02039 | 0.042166 | 0.629496 |
| 4992_49_C finngen_R outcome | 4992_49_C MR Egger   | 13  | 0.040658 | 0.31784  | 0.90052  |
| 4992_49_C finngen_R outcome | 4992_49_C Weighted   | 13  | -0.22534 | 0.15391  | 0.143167 |
| 4992_49_C finngen_R outcome | 4992_49_C Inverse va | 13  | -0.27302 | 0.140414 | 0.05185  |
| 4992_49_C finngen_R outcome | 4992_49_C Simple mc  | 13  | -0.45502 | 0.357087 | 0.226697 |
| 4992_49_C finngen_R outcome | 4992_49_C Weighted   | 13  | -0.27887 | 0.160435 | 0.107738 |
| 4996_66_F finngen_R outcome | 4996_66_F MR Egger   | 141 | -0.06114 | 0.044277 | 0.169515 |
| 4996_66_F finngen_R outcome | 4996_66_F Weighted   | 141 | -0.07926 | 0.042926 | 0.064831 |
| 4996_66_F finngen_R outcome | 4996_66_F Inverse va | 141 | -0.0678  | 0.026951 | 0.011881 |
| 4996_66_F finngen_R outcome | 4996_66_F Simple mc  | 141 | -0.11038 | 0.078348 | 0.161109 |
| 4996_66_F finngen_R outcome | 4996_66_F Weighted   | 141 | -0.07222 | 0.041623 | 0.084932 |
| 5000_52_L finngen_R outcome | 5000_52_L MR Egger   | 18  | -0.03129 | 0.225988 | 0.891617 |
| 5000_52_L finngen_R outcome | 5000_52_L Weighted   | 18  | -0.0951  | 0.151646 | 0.530588 |
| 5000_52_L finngen_R outcome | 5000_52_L Inverse va | 18  | -0.11651 | 0.107374 | 0.277876 |
| 5000_52_L finngen_R outcome | 5000_52_L Simple mc  | 18  | -0.17746 | 0.265262 | 0.512482 |
| 5000_52_L finngen_R outcome | 5000_52_L Weighted   | 18  | 0.004416 | 0.199961 | 0.982636 |
| 5005_4_M finngen_R outcome  | 5005_4_M MR Egger    | 24  | -0.01829 | 0.331417 | 0.956491 |
| 5005_4_M finngen_R outcome  | 5005_4_M Weighted    | 24  | 0.060495 | 0.142675 | 0.671564 |
| 5005_4_M finngen_R outcome  | 5005_4_M Inverse va  | 24  | 0.059103 | 0.104871 | 0.573039 |
| 5005_4_M finngen_R outcome  | 5005_4_M Simple mc   | 24  | 0.054872 | 0.206454 | 0.792773 |
| 5005_4_M finngen_R outcome  | 5005_4_M Weighted    | 24  | 0.046479 | 0.164602 | 0.780182 |
| 5006_71_M finngen_R outcome | 5006_71_M Inverse va | 2   | -0.60284 | 0.349488 | 0.084543 |
| 5015_15_F finngen_R outcome | 5015_15_F MR Egger   | 17  | 0.398335 | 0.415492 | 0.352905 |
| 5015_15_F finngen_R outcome | 5015_15_F Weighted   | 17  | 0.361039 | 0.209904 | 0.085429 |
| 5015_15_F finngen_R outcome | 5015_15_F Inverse va | 17  | 0.277837 | 0.181955 | 0.126772 |
| 5015_15_F finngen_R outcome | 5015_15_F Simple mc  | 17  | 0.372588 | 0.2647   | 0.178385 |
| 5015_15_F finngen_R outcome | 5015_15_F Weighted   | 17  | 0.329534 | 0.234069 | 0.178307 |
| 5029_3_FA finngen_R outcome | 5029_3_FA MR Egger   | 10  | 0.176572 | 0.190882 | 0.382004 |
| 5029_3_FA finngen_R outcome | 5029_3_FA Weighted   | 10  | 0.145688 | 0.170968 | 0.394136 |
| 5029_3_FA finngen_R outcome | 5029_3_FA Inverse va | 10  | 0.049128 | 0.138218 | 0.72226  |
| 5029_3_FA finngen_R outcome | 5029_3_FA Simple mc  | 10  | -0.19244 | 0.320807 | 0.563398 |
| 5029_3_FA finngen_R outcome | 5029_3_FA Weighted   | 10  | 0.181156 | 0.172125 | 0.320021 |
| 5036_50_T finngen_R outcome | 5036_50_T MR Egger   | 79  | 0.014228 | 0.059337 | 0.811132 |
| 5036_50_T finngen_R outcome | 5036_50_T Weighted   | 79  | -0.03227 | 0.054991 | 0.557374 |
| 5036_50_T finngen_R outcome | 5036_50_T Inverse va | 79  | 0.004248 | 0.035139 | 0.903779 |
| 5036_50_T finngen_R outcome | 5036_50_T Simple mc  | 79  | -0.06805 | 0.105314 | 0.520068 |
| 5036_50_T finngen_R outcome | 5036_50_T Weighted   | 79  | -0.01919 | 0.047676 | 0.688388 |
| 5060_62_C finngen_R outcome | 5060_62_C MR Egger   | 23  | 0.001735 | 0.175917 | 0.992224 |
| 5060_62_C finngen_R outcome | 5060_62_C Weighted   | 23  | -0.03994 | 0.135155 | 0.76759  |
| 5060_62_C finngen_R outcome | 5060_62_C Inverse va | 23  | -0.09757 | 0.090448 | 0.280689 |
| 5060_62_C finngen_R outcome | 5060_62_C Simple mc  | 23  | 0.115062 | 0.250866 | 0.65098  |
| 5060_62_C finngen_R outcome | 5060_62_C Weighted   | 23  | -0.07775 | 0.137637 | 0.577887 |
| 5063_12_C finngen_R outcome | 5063_12_C Wald ratio | 1   | -0.37056 | 1.084692 | 0.73263  |
| 5066_134_finngen_R outcome  | 5066_134_MR Egger    | 16  | -0.05275 | 0.194957 | 0.790662 |
| 5066_134_finngen_R outcome  | 5066_134_Weighted    | 16  | -0.19266 | 0.157789 | 0.222095 |
| 5066_134_finngen_R outcome  | 5066_134_Inverse va  | 16  | -0.2145  | 0.135595 | 0.113669 |
| 5066_134_finngen_R outcome  | 5066_134_Simple mc   | 16  | -0.66644 | 0.275024 | 0.0285   |
| 5066_134_finngen_R outcome  | 5066_134_Weighted    | 16  | -0.15688 | 0.138791 | 0.276084 |
| 5069_9_CI finngen_R outcome | 5069_9_CI MR Egger   | 40  | -0.05163 | 0.141016 | 0.716282 |
| 5069_9_CI finngen_R outcome | 5069_9_CI Weighted   | 40  | -0.14697 | 0.101922 | 0.149314 |

|                              |                       |     |          |          |          |
|------------------------------|-----------------------|-----|----------|----------|----------|
| 5069_9_CI finngen_R outcome  | 5069_9_CI Inverse va  | 40  | -0.20653 | 0.071162 | 0.003705 |
| 5069_9_CI finngen_R outcome  | 5069_9_CI Simple mc   | 40  | -0.20843 | 0.172194 | 0.233403 |
| 5069_9_CI finngen_R outcome  | 5069_9_CI Weighted    | 40  | -0.15245 | 0.134141 | 0.26269  |
| 5076_53_E finngen_R outcome  | 5076_53_E Inverse va  | 2   | 0.398502 | 0.676201 | 0.555644 |
| 5078_82_E finngen_R outcome  | 5078_82_E MR Egger    | 26  | -0.50078 | 0.216319 | 0.02948  |
| 5078_82_E finngen_R outcome  | 5078_82_E Weighted    | 26  | -0.35117 | 0.143725 | 0.014553 |
| 5078_82_E finngen_R outcome  | 5078_82_E Inverse va  | 26  | -0.32124 | 0.096181 | 0.000838 |
| 5078_82_E finngen_R outcome  | 5078_82_E Simple mc   | 26  | -0.48537 | 0.231326 | 0.046157 |
| 5078_82_E finngen_R outcome  | 5078_82_E Weighted    | 26  | -0.38129 | 0.13979  | 0.011498 |
| 5085_18_II finngen_R outcome | 5085_18_II Wald ratio | 1   | 0.200412 | 0.661949 | 0.762073 |
| 5087_5_IL: finngen_R outcome | 5087_5_IL: MR Egger   | 15  | 0.120592 | 0.22075  | 0.594123 |
| 5087_5_IL: finngen_R outcome | 5087_5_IL: Weighted   | 15  | -0.05301 | 0.17192  | 0.757801 |
| 5087_5_IL: finngen_R outcome | 5087_5_IL: Inverse va | 15  | 0.068537 | 0.126269 | 0.587281 |
| 5087_5_IL: finngen_R outcome | 5087_5_IL: Simple mc  | 15  | -0.02089 | 0.234624 | 0.930318 |
| 5087_5_IL: finngen_R outcome | 5087_5_IL: Weighted   | 15  | -0.05038 | 0.201011 | 0.805725 |
| 5089_11_II finngen_R outcome | 5089_11_II Wald ratio | 1   | 0.560923 | 0.642423 | 0.382589 |
| 5090_49_L finngen_R outcome  | 5090_49_L MR Egger    | 154 | -0.02958 | 0.033876 | 0.383941 |
| 5090_49_L finngen_R outcome  | 5090_49_L Weighted    | 154 | -0.0454  | 0.038845 | 0.242532 |
| 5090_49_L finngen_R outcome  | 5090_49_L Inverse va  | 154 | -0.01857 | 0.02405  | 0.439988 |
| 5090_49_L finngen_R outcome  | 5090_49_L Simple mc   | 154 | 0.025477 | 0.094129 | 0.787016 |
| 5090_49_L finngen_R outcome  | 5090_49_L Weighted    | 154 | -0.0194  | 0.034791 | 0.577882 |
| 5091_28_L finngen_R outcome  | 5091_28_L MR Egger    | 110 | 0.004157 | 0.035025 | 0.905734 |
| 5091_28_L finngen_R outcome  | 5091_28_L Weighted    | 110 | 0.017607 | 0.035517 | 0.620091 |
| 5091_28_L finngen_R outcome  | 5091_28_L Inverse va  | 110 | -0.01569 | 0.026294 | 0.550596 |
| 5091_28_L finngen_R outcome  | 5091_28_L Simple mc   | 110 | 0.058236 | 0.111203 | 0.601556 |
| 5091_28_L finngen_R outcome  | 5091_28_L Weighted    | 110 | 0.001353 | 0.031442 | 0.965744 |
| 5092_51_J finngen_R outcome  | 5092_51_J Inverse va  | 2   | 0.280094 | 0.846567 | 0.740751 |
| 5095_21_k finngen_R outcome  | 5095_21_k MR Egger    | 23  | -0.17961 | 0.16534  | 0.289649 |
| 5095_21_k finngen_R outcome  | 5095_21_k Weighted    | 23  | -0.14638 | 0.101777 | 0.150372 |
| 5095_21_k finngen_R outcome  | 5095_21_k Inverse va  | 23  | -0.17113 | 0.074579 | 0.021754 |
| 5095_21_k finngen_R outcome  | 5095_21_k Simple mc   | 23  | -0.2575  | 0.139726 | 0.078859 |
| 5095_21_k finngen_R outcome  | 5095_21_k Weighted    | 23  | -0.17048 | 0.099683 | 0.101293 |
| 5103_30_C finngen_R outcome  | 5103_30_C MR Egger    | 4   | 2.22402  | 1.184326 | 0.201187 |
| 5103_30_C finngen_R outcome  | 5103_30_C Weighted    | 4   | 0.317357 | 0.278303 | 0.254149 |
| 5103_30_C finngen_R outcome  | 5103_30_C Inverse va  | 4   | 0.356924 | 0.244979 | 0.145128 |
| 5103_30_C finngen_R outcome  | 5103_30_C Simple mc   | 4   | -0.04892 | 0.445297 | 0.919451 |
| 5103_30_C finngen_R outcome  | 5103_30_C Weighted    | 4   | 0.45019  | 0.298638 | 0.228797 |
| 5105_2_RI finngen_R outcome  | 5105_2_RI MR Egger    | 54  | 0.120238 | 0.106285 | 0.263127 |
| 5105_2_RI finngen_R outcome  | 5105_2_RI Weighted    | 54  | 0.082368 | 0.07301  | 0.25925  |
| 5105_2_RI finngen_R outcome  | 5105_2_RI Inverse va  | 54  | 0.035078 | 0.052348 | 0.502799 |
| 5105_2_RI finngen_R outcome  | 5105_2_RI Simple mc   | 54  | 0.080437 | 0.136332 | 0.557695 |
| 5105_2_RI finngen_R outcome  | 5105_2_RI Weighted    | 54  | 0.080437 | 0.07732  | 0.302921 |
| 5107_7_NI finngen_R outcome  | 5107_7_NI MR Egger    | 9   | 0.168508 | 0.417786 | 0.698737 |
| 5107_7_NI finngen_R outcome  | 5107_7_NI Weighted    | 9   | 0.032986 | 0.221593 | 0.881664 |
| 5107_7_NI finngen_R outcome  | 5107_7_NI Inverse va  | 9   | 0.169227 | 0.175766 | 0.335649 |
| 5107_7_NI finngen_R outcome  | 5107_7_NI Simple mc   | 9   | -0.03445 | 0.30853  | 0.913835 |
| 5107_7_NI finngen_R outcome  | 5107_7_NI Weighted    | 9   | 0.009125 | 0.262666 | 0.973137 |
| 5108_72_I finngen_R outcome  | 5108_72_I MR Egger    | 3   | -0.71711 | 0.88537  | 0.5666   |
| 5108_72_I finngen_R outcome  | 5108_72_I Weighted    | 3   | -0.60397 | 0.38987  | 0.121341 |
| 5108_72_I finngen_R outcome  | 5108_72_I Inverse va  | 3   | -0.58263 | 0.345739 | 0.091954 |
| 5108_72_I finngen_R outcome  | 5108_72_I Simple mc   | 3   | -0.82242 | 0.45889  | 0.214974 |
| 5108_72_I finngen_R outcome  | 5108_72_I Weighted    | 3   | -0.78462 | 0.458027 | 0.228835 |
| 5111_15_I finngen_R outcome  | 5111_15_I MR Egger    | 24  | -0.09155 | 0.207176 | 0.662893 |
| 5111_15_I finngen_R outcome  | 5111_15_I Weighted    | 24  | 0.054447 | 0.128577 | 0.671961 |
| 5111_15_I finngen_R outcome  | 5111_15_I Inverse va  | 24  | 0.119371 | 0.093416 | 0.201306 |
| 5111_15_I finngen_R outcome  | 5111_15_I Simple mc   | 24  | 0.100771 | 0.206714 | 0.630525 |
| 5111_15_I finngen_R outcome  | 5111_15_I Weighted    | 24  | 0.032434 | 0.150712 | 0.831507 |
| 5112_73_C finngen_R outcome  | 5112_73_C MR Egger    | 3   | -0.12564 | 0.878671 | 0.909586 |

|                             |                      |    |          |          |          |
|-----------------------------|----------------------|----|----------|----------|----------|
| 5112_73_C finngen_R outcome | 5112_73_C Weighted   | 3  | -0.31661 | 0.333037 | 0.341769 |
| 5112_73_C finngen_R outcome | 5112_73_C Inverse va | 3  | -0.34386 | 0.291453 | 0.238082 |
| 5112_73_C finngen_R outcome | 5112_73_C Simple mc  | 3  | -0.32319 | 0.405596 | 0.50911  |
| 5112_73_C finngen_R outcome | 5112_73_C Weighted   | 3  | -0.29512 | 0.335033 | 0.471303 |
| 5121_3_SE finngen_R outcome | 5121_3_SE MR Egger   | 4  | -0.7725  | 0.983434 | 0.514433 |
| 5121_3_SE finngen_R outcome | 5121_3_SE Weighted   | 4  | 0.212817 | 0.333058 | 0.522837 |
| 5121_3_SE finngen_R outcome | 5121_3_SE Inverse va | 4  | 0.119421 | 0.279297 | 0.668959 |
| 5121_3_SE finngen_R outcome | 5121_3_SE Simple mc  | 4  | 0.342153 | 0.439715 | 0.493227 |
| 5121_3_SE finngen_R outcome | 5121_3_SE Weighted   | 4  | 0.197508 | 0.376644 | 0.636287 |
| 5128_53_S finngen_R outcome | 5128_53_S MR Egger   | 3  | 0.290359 | 0.559693 | 0.695339 |
| 5128_53_S finngen_R outcome | 5128_53_S Weighted   | 3  | 0.126156 | 0.191711 | 0.510506 |
| 5128_53_S finngen_R outcome | 5128_53_S Inverse va | 3  | 0.092595 | 0.196653 | 0.637742 |
| 5128_53_S finngen_R outcome | 5128_53_S Simple mc  | 3  | -0.00185 | 0.391849 | 0.996662 |
| 5128_53_S finngen_R outcome | 5128_53_S Weighted   | 3  | 0.139732 | 0.192848 | 0.544016 |
| 5131_15_T finngen_R outcome | 5131_15_T MR Egger   | 6  | 1.181718 | 0.719113 | 0.175666 |
| 5131_15_T finngen_R outcome | 5131_15_T Weighted   | 6  | 0.55921  | 0.297627 | 0.060259 |
| 5131_15_T finngen_R outcome | 5131_15_T Inverse va | 6  | 0.276312 | 0.235703 | 0.241082 |
| 5131_15_T finngen_R outcome | 5131_15_T Simple mc  | 6  | 0.558676 | 0.482791 | 0.299473 |
| 5131_15_T finngen_R outcome | 5131_15_T Weighted   | 6  | 0.558676 | 0.371514 | 0.192964 |
| 5196_7_NI finngen_R outcome | 5196_7_NI Wald ratic | 1  | -0.39848 | 0.749445 | 0.594932 |
| 5202_4_PF finngen_R outcome | 5202_4_PF MR Egger   | 20 | 0.053968 | 0.165167 | 0.747627 |
| 5202_4_PF finngen_R outcome | 5202_4_PF Weighted   | 20 | 0.135888 | 0.112615 | 0.227563 |
| 5202_4_PF finngen_R outcome | 5202_4_PF Inverse va | 20 | 0.026253 | 0.097339 | 0.787387 |
| 5202_4_PF finngen_R outcome | 5202_4_PF Simple mc  | 20 | 0.245679 | 0.232825 | 0.304564 |
| 5202_4_PF finngen_R outcome | 5202_4_PF Weighted   | 20 | 0.068942 | 0.104248 | 0.516346 |
| 5227_60_F finngen_R outcome | 5227_60_F MR Egger   | 13 | 0.056675 | 0.420551 | 0.895233 |
| 5227_60_F finngen_R outcome | 5227_60_F Weighted   | 13 | 0.305095 | 0.208207 | 0.142827 |
| 5227_60_F finngen_R outcome | 5227_60_F Inverse va | 13 | 0.261056 | 0.154285 | 0.09064  |
| 5227_60_F finngen_R outcome | 5227_60_F Simple mc  | 13 | 0.330412 | 0.297887 | 0.289085 |
| 5227_60_F finngen_R outcome | 5227_60_F Weighted   | 13 | 0.330412 | 0.258056 | 0.224605 |
| 5231_79_F finngen_R outcome | 5231_79_F MR Egger   | 25 | 0.082148 | 0.098887 | 0.414668 |
| 5231_79_F finngen_R outcome | 5231_79_F Weighted   | 25 | 0.078491 | 0.09076  | 0.387141 |
| 5231_79_F finngen_R outcome | 5231_79_F Inverse va | 25 | -0.0173  | 0.067988 | 0.799087 |
| 5231_79_F finngen_R outcome | 5231_79_F Simple mc  | 25 | -0.35381 | 0.200791 | 0.090786 |
| 5231_79_F finngen_R outcome | 5231_79_F Weighted   | 25 | 0.0602   | 0.089305 | 0.506697 |
| 5238_26_F finngen_R outcome | 5238_26_F MR Egger   | 29 | 0.578578 | 0.239266 | 0.02262  |
| 5238_26_F finngen_R outcome | 5238_26_F Weighted   | 29 | 0.301897 | 0.149891 | 0.043997 |
| 5238_26_F finngen_R outcome | 5238_26_F Inverse va | 29 | 0.197556 | 0.100115 | 0.048462 |
| 5238_26_F finngen_R outcome | 5238_26_F Simple mc  | 29 | 0.149676 | 0.302956 | 0.625123 |
| 5238_26_F finngen_R outcome | 5238_26_F Weighted   | 29 | 0.301028 | 0.200856 | 0.145137 |
| 5256_86_F finngen_R outcome | 5256_86_F MR Egger   | 29 | -0.04401 | 0.228323 | 0.848598 |
| 5256_86_F finngen_R outcome | 5256_86_F Weighted   | 29 | -0.2857  | 0.142138 | 0.044429 |
| 5256_86_F finngen_R outcome | 5256_86_F Inverse va | 29 | -0.19963 | 0.097053 | 0.03969  |
| 5256_86_F finngen_R outcome | 5256_86_F Simple mc  | 29 | -0.23548 | 0.250338 | 0.354926 |
| 5256_86_F finngen_R outcome | 5256_86_F Weighted   | 29 | -0.26238 | 0.144218 | 0.079574 |
| 5301_7_C( finngen_R outcome | 5301_7_C( MR Egger   | 4  | 0.190092 | 1.830902 | 0.926782 |
| 5301_7_C( finngen_R outcome | 5301_7_C( Weighted   | 4  | 0.14798  | 0.350295 | 0.672702 |
| 5301_7_C( finngen_R outcome | 5301_7_C( Inverse va | 4  | -0.00632 | 0.284342 | 0.982255 |
| 5301_7_C( finngen_R outcome | 5301_7_C( Simple mc  | 4  | 0.129875 | 0.456829 | 0.794678 |
| 5301_7_C( finngen_R outcome | 5301_7_C( Weighted   | 4  | 0.234345 | 0.373186 | 0.574582 |
| 5316_54_F finngen_R outcome | 5316_54_F MR Egger   | 5  | -1.37533 | 0.971647 | 0.251884 |
| 5316_54_F finngen_R outcome | 5316_54_F Weighted   | 5  | -0.715   | 0.282948 | 0.011506 |
| 5316_54_F finngen_R outcome | 5316_54_F Inverse va | 5  | -0.66323 | 0.242972 | 0.00634  |
| 5316_54_F finngen_R outcome | 5316_54_F Simple mc  | 5  | -0.63123 | 0.425846 | 0.212398 |
| 5316_54_F finngen_R outcome | 5316_54_F Weighted   | 5  | -0.8163  | 0.326186 | 0.066584 |
| 5337_64_C finngen_R outcome | 5337_64_C Inverse va | 2  | -0.45207 | 0.483344 | 0.349631 |
| 5339_49_S finngen_R outcome | 5339_49_S Wald ratic | 1  | -1.03673 | 0.73503  | 0.158403 |
| 5350_14_C finngen_R outcome | 5350_14_C Inverse va | 2  | 0.578631 | 0.47241  | 0.220632 |

|                              |                       |     |          |          |          |
|------------------------------|-----------------------|-----|----------|----------|----------|
| 5353_89_II finngen_R outcome | 5353_89_II MR Egger   | 18  | -0.34367 | 0.234027 | 0.161357 |
| 5353_89_II finngen_R outcome | 5353_89_II Weighted   | 18  | -0.12983 | 0.142061 | 0.360769 |
| 5353_89_II finngen_R outcome | 5353_89_II Inverse va | 18  | -0.08115 | 0.104531 | 0.437559 |
| 5353_89_II finngen_R outcome | 5353_89_II Simple mc  | 18  | -0.20932 | 0.211339 | 0.33584  |
| 5353_89_II finngen_R outcome | 5353_89_II Weighted   | 18  | -0.13535 | 0.124066 | 0.29051  |
| 5355_69_T finngen_R outcome  | 5355_69_T MR Egger    | 8   | -0.54353 | 0.394397 | 0.217354 |
| 5355_69_T finngen_R outcome  | 5355_69_T Weighted    | 8   | -0.0802  | 0.196385 | 0.682981 |
| 5355_69_T finngen_R outcome  | 5355_69_T Inverse va  | 8   | -0.08948 | 0.157124 | 0.569024 |
| 5355_69_T finngen_R outcome  | 5355_69_T Simple mc   | 8   | 0.069447 | 0.28195  | 0.812509 |
| 5355_69_T finngen_R outcome  | 5355_69_T Weighted    | 8   | -0.11228 | 0.206224 | 0.603026 |
| 5358_3_OI finngen_R outcome  | 5358_3_OI Inverse va  | 2   | 0.351727 | 1.223619 | 0.773769 |
| 5363_51_S finngen_R outcome  | 5363_51_S MR Egger    | 142 | -0.04123 | 0.043183 | 0.341301 |
| 5363_51_S finngen_R outcome  | 5363_51_S Weighted    | 142 | -0.01561 | 0.037071 | 0.673767 |
| 5363_51_S finngen_R outcome  | 5363_51_S Inverse va  | 142 | -0.01294 | 0.024147 | 0.59211  |
| 5363_51_S finngen_R outcome  | 5363_51_S Simple mc   | 142 | 0.004559 | 0.069293 | 0.947633 |
| 5363_51_S finngen_R outcome  | 5363_51_S Weighted    | 142 | -0.03434 | 0.035957 | 0.341133 |
| 5392_73_F finngen_R outcome  | 5392_73_F MR Egger    | 23  | -0.15462 | 0.168197 | 0.368402 |
| 5392_73_F finngen_R outcome  | 5392_73_F Weighted    | 23  | 0.081125 | 0.126384 | 0.520943 |
| 5392_73_F finngen_R outcome  | 5392_73_F Inverse va  | 23  | 0.1697   | 0.096978 | 0.08014  |
| 5392_73_F finngen_R outcome  | 5392_73_F Simple mc   | 23  | 0.272466 | 0.213493 | 0.215183 |
| 5392_73_F finngen_R outcome  | 5392_73_F Weighted    | 23  | 0.08869  | 0.130534 | 0.503945 |
| 5400_52_L finngen_R outcome  | 5400_52_L MR Egger    | 140 | 0.042846 | 0.03705  | 0.249502 |
| 5400_52_L finngen_R outcome  | 5400_52_L Weighted    | 140 | 0.051233 | 0.036177 | 0.156721 |
| 5400_52_L finngen_R outcome  | 5400_52_L Inverse va  | 140 | 0.032823 | 0.023496 | 0.162425 |
| 5400_52_L finngen_R outcome  | 5400_52_L Simple mc   | 140 | -0.00749 | 0.064823 | 0.908237 |
| 5400_52_L finngen_R outcome  | 5400_52_L Weighted    | 140 | 0.04024  | 0.029908 | 0.180672 |
| 5404_53_T finngen_R outcome  | 5404_53_T MR Egger    | 8   | 1.327151 | 0.770873 | 0.13592  |
| 5404_53_T finngen_R outcome  | 5404_53_T Weighted    | 8   | -0.18622 | 0.283321 | 0.511    |
| 5404_53_T finngen_R outcome  | 5404_53_T Inverse va  | 8   | -0.17247 | 0.272019 | 0.526046 |
| 5404_53_T finngen_R outcome  | 5404_53_T Simple mc   | 8   | -0.39669 | 0.431096 | 0.388085 |
| 5404_53_T finngen_R outcome  | 5404_53_T Weighted    | 8   | -0.13613 | 0.318918 | 0.682313 |
| 5430_66_S finngen_R outcome  | 5430_66_S MR Egger    | 232 | -0.01717 | 0.032928 | 0.602558 |
| 5430_66_S finngen_R outcome  | 5430_66_S Weighted    | 232 | 0.006694 | 0.032214 | 0.83538  |
| 5430_66_S finngen_R outcome  | 5430_66_S Inverse va  | 232 | -0.00378 | 0.019528 | 0.846609 |
| 5430_66_S finngen_R outcome  | 5430_66_S Simple mc   | 232 | -0.02024 | 0.056414 | 0.720087 |
| 5430_66_S finngen_R outcome  | 5430_66_S Weighted    | 232 | -0.00093 | 0.030973 | 0.975976 |
| 5443_62_I finngen_R outcome  | 5443_62_I Wald ratio  | 1   | -0.28876 | 0.457328 | 0.527777 |
| 5451_1_AI finngen_R outcome  | 5451_1_AI MR Egger    | 13  | -0.29679 | 0.426334 | 0.500778 |
| 5451_1_AI finngen_R outcome  | 5451_1_AI Weighted    | 13  | 0.390366 | 0.207248 | 0.059623 |
| 5451_1_AI finngen_R outcome  | 5451_1_AI Inverse va  | 13  | 0.313975 | 0.171455 | 0.067065 |
| 5451_1_AI finngen_R outcome  | 5451_1_AI Simple mc   | 13  | 0.533446 | 0.302519 | 0.103263 |
| 5451_1_AI finngen_R outcome  | 5451_1_AI Weighted    | 13  | 0.469086 | 0.278362 | 0.117763 |
| 5452_71_I finngen_R outcome  | 5452_71_I Inverse va  | 2   | -0.05307 | 0.290504 | 0.855039 |
| 5456_59_C finngen_R outcome  | 5456_59_C MR Egger    | 60  | 0.009518 | 0.098442 | 0.923308 |
| 5456_59_C finngen_R outcome  | 5456_59_C Weighted    | 60  | -0.11326 | 0.081845 | 0.166408 |
| 5456_59_C finngen_R outcome  | 5456_59_C Inverse va  | 60  | #####    | 0.052016 | 0.998603 |
| 5456_59_C finngen_R outcome  | 5456_59_C Simple mc   | 60  | -0.06336 | 0.17116  | 0.712581 |
| 5456_59_C finngen_R outcome  | 5456_59_C Weighted    | 60  | -0.03943 | 0.084726 | 0.643408 |
| 5459_33_C finngen_R outcome  | 5459_33_C MR Egger    | 90  | 0.01348  | 0.069005 | 0.845576 |
| 5459_33_C finngen_R outcome  | 5459_33_C Weighted    | 90  | -0.02225 | 0.057951 | 0.700999 |
| 5459_33_C finngen_R outcome  | 5459_33_C Inverse va  | 90  | -0.01679 | 0.040263 | 0.676599 |
| 5459_33_C finngen_R outcome  | 5459_33_C Simple mc   | 90  | -0.02039 | 0.109614 | 0.852821 |
| 5459_33_C finngen_R outcome  | 5459_33_C Weighted    | 90  | -0.02039 | 0.052625 | 0.699273 |
| 5462_62_F finngen_R outcome  | 5462_62_F MR Egger    | 21  | 0.200792 | 0.109313 | 0.081928 |
| 5462_62_F finngen_R outcome  | 5462_62_F Weighted    | 21  | 0.114423 | 0.095047 | 0.228646 |
| 5462_62_F finngen_R outcome  | 5462_62_F Inverse va  | 21  | 0.050934 | 0.092069 | 0.580119 |
| 5462_62_F finngen_R outcome  | 5462_62_F Simple mc   | 21  | 0.182893 | 0.164909 | 0.280564 |
| 5462_62_F finngen_R outcome  | 5462_62_F Weighted    | 21  | 0.127023 | 0.084446 | 0.148162 |

|                             |                      |     |          |          |          |
|-----------------------------|----------------------|-----|----------|----------|----------|
| 5475_10_F finngen_R outcome | 5475_10_F Wald ratio | 1   | -0.6513  | 0.576156 | 0.258297 |
| 5478_50_F finngen_R outcome | 5478_50_F MR Egger   | 3   | -0.24629 | 0.329159 | 0.591055 |
| 5478_50_F finngen_R outcome | 5478_50_F Weighted   | 3   | -0.3722  | 0.197809 | 0.05989  |
| 5478_50_F finngen_R outcome | 5478_50_F Inverse va | 3   | -0.38174 | 0.185615 | 0.039724 |
| 5478_50_F finngen_R outcome | 5478_50_F Simple mc  | 3   | -0.40613 | 0.260745 | 0.259639 |
| 5478_50_F finngen_R outcome | 5478_50_F Weighted   | 3   | -0.37994 | 0.248737 | 0.266213 |
| 5480_49_C finngen_R outcome | 5480_49_C MR Egger   | 9   | 0.563395 | 0.269347 | 0.074781 |
| 5480_49_C finngen_R outcome | 5480_49_C Weighted   | 9   | 0.392348 | 0.164968 | 0.017391 |
| 5480_49_C finngen_R outcome | 5480_49_C Inverse va | 9   | 0.406505 | 0.140382 | 0.003783 |
| 5480_49_C finngen_R outcome | 5480_49_C Simple mc  | 9   | 0.506832 | 0.30781  | 0.138262 |
| 5480_49_C finngen_R outcome | 5480_49_C Weighted   | 9   | 0.391511 | 0.16728  | 0.047381 |
| 5487_7_SL finngen_R outcome | 5487_7_SL MR Egger   | 99  | 0.013055 | 0.045257 | 0.773601 |
| 5487_7_SL finngen_R outcome | 5487_7_SL Weighted   | 99  | -0.00036 | 0.043219 | 0.99341  |
| 5487_7_SL finngen_R outcome | 5487_7_SL Inverse va | 99  | 0.003987 | 0.027792 | 0.885936 |
| 5487_7_SL finngen_R outcome | 5487_7_SL Simple mc  | 99  | -0.01637 | 0.076817 | 0.83165  |
| 5487_7_SL finngen_R outcome | 5487_7_SL Weighted   | 99  | -0.00579 | 0.036064 | 0.872673 |
| 5491_12_S finngen_R outcome | 5491_12_S MR Egger   | 13  | 0.606812 | 0.27118  | 0.046892 |
| 5491_12_S finngen_R outcome | 5491_12_S Weighted   | 13  | 0.417289 | 0.157138 | 0.007918 |
| 5491_12_S finngen_R outcome | 5491_12_S Inverse va | 13  | 0.3824   | 0.115403 | 0.000921 |
| 5491_12_S finngen_R outcome | 5491_12_S Simple mc  | 13  | 0.359869 | 0.243708 | 0.165526 |
| 5491_12_S finngen_R outcome | 5491_12_S Weighted   | 13  | 0.424571 | 0.166628 | 0.025559 |
| 5508_62_C finngen_R outcome | 5508_62_C MR Egger   | 39  | 0.196514 | 0.172962 | 0.263192 |
| 5508_62_C finngen_R outcome | 5508_62_C Weighted   | 39  | 0.112336 | 0.114986 | 0.32859  |
| 5508_62_C finngen_R outcome | 5508_62_C Inverse va | 39  | 0.081986 | 0.082193 | 0.318535 |
| 5508_62_C finngen_R outcome | 5508_62_C Simple mc  | 39  | 0.273257 | 0.189524 | 0.157547 |
| 5508_62_C finngen_R outcome | 5508_62_C Weighted   | 39  | 0.172166 | 0.137599 | 0.218504 |
| 5509_7_EC finngen_R outcome | 5509_7_EC MR Egger   | 10  | 0.080935 | 0.379884 | 0.836616 |
| 5509_7_EC finngen_R outcome | 5509_7_EC Weighted   | 10  | -0.02431 | 0.229247 | 0.915542 |
| 5509_7_EC finngen_R outcome | 5509_7_EC Inverse va | 10  | 0.034622 | 0.176003 | 0.844053 |
| 5509_7_EC finngen_R outcome | 5509_7_EC Simple mc  | 10  | 0.072008 | 0.331076 | 0.832673 |
| 5509_7_EC finngen_R outcome | 5509_7_EC Weighted   | 10  | -0.01476 | 0.242989 | 0.952894 |
| 5532_53_F finngen_R outcome | 5532_53_F MR Egger   | 5   | 0.92418  | 1.680596 | 0.620673 |
| 5532_53_F finngen_R outcome | 5532_53_F Weighted   | 5   | -0.1443  | 0.322558 | 0.654611 |
| 5532_53_F finngen_R outcome | 5532_53_F Inverse va | 5   | -0.35732 | 0.344895 | 0.300186 |
| 5532_53_F finngen_R outcome | 5532_53_F Simple mc  | 5   | -0.18939 | 0.405173 | 0.664528 |
| 5532_53_F finngen_R outcome | 5532_53_F Weighted   | 5   | -0.14533 | 0.346034 | 0.696071 |
| 5542_22_I finngen_R outcome | 5542_22_I MR Egger   | 34  | 0.003573 | 0.13066  | 0.978355 |
| 5542_22_I finngen_R outcome | 5542_22_I Weighted   | 34  | 0.044806 | 0.098128 | 0.647953 |
| 5542_22_I finngen_R outcome | 5542_22_I Inverse va | 34  | -0.00262 | 0.064863 | 0.967799 |
| 5542_22_I finngen_R outcome | 5542_22_I Simple mc  | 34  | -0.12579 | 0.168396 | 0.460361 |
| 5542_22_I finngen_R outcome | 5542_22_I Weighted   | 34  | 0.0441   | 0.093542 | 0.640421 |
| 5581_28_F finngen_R outcome | 5581_28_F MR Egger   | 115 | 0.007621 | 0.05272  | 0.885324 |
| 5581_28_F finngen_R outcome | 5581_28_F Weighted   | 115 | 0.060945 | 0.05422  | 0.260996 |
| 5581_28_F finngen_R outcome | 5581_28_F Inverse va | 115 | 0.061581 | 0.035397 | 0.081909 |
| 5581_28_F finngen_R outcome | 5581_28_F Simple mc  | 115 | 0.020658 | 0.115901 | 0.858854 |
| 5581_28_F finngen_R outcome | 5581_28_F Weighted   | 115 | 0.05269  | 0.054753 | 0.337923 |
| 5584_21_T finngen_R outcome | 5584_21_T MR Egger   | 80  | 0.127691 | 0.054448 | 0.021561 |
| 5584_21_T finngen_R outcome | 5584_21_T Weighted   | 80  | 0.084042 | 0.050869 | 0.098506 |
| 5584_21_T finngen_R outcome | 5584_21_T Inverse va | 80  | 0.078792 | 0.030765 | 0.010434 |
| 5584_21_T finngen_R outcome | 5584_21_T Simple mc  | 80  | 0.027288 | 0.086263 | 0.752584 |
| 5584_21_T finngen_R outcome | 5584_21_T Weighted   | 80  | 0.082214 | 0.048338 | 0.092915 |
| 5586_66_M finngen_R outcome | 5586_66_M MR Egger   | 6   | -0.32846 | 0.987745 | 0.756183 |
| 5586_66_M finngen_R outcome | 5586_66_M Weighted   | 6   | 0.226761 | 0.308018 | 0.461612 |
| 5586_66_M finngen_R outcome | 5586_66_M Inverse va | 6   | 0.487165 | 0.262456 | 0.063428 |
| 5586_66_M finngen_R outcome | 5586_66_M Simple mc  | 6   | 0.505096 | 0.509406 | 0.36695  |
| 5586_66_M finngen_R outcome | 5586_66_M Weighted   | 6   | 0.231875 | 0.341007 | 0.526724 |
| 5598_3_GI finngen_R outcome | 5598_3_GI Wald ratio | 1   | 1.778827 | 0.899232 | 0.04791  |
| 5601_2_PC finngen_R outcome | 5601_2_PC MR Egger   | 40  | -0.02268 | 0.117468 | 0.847945 |

|                             |                      |    |          |          |          |
|-----------------------------|----------------------|----|----------|----------|----------|
| 5601_2_PC finngen_R outcome | 5601_2_PC Weighted   | 40 | -0.07818 | 0.101952 | 0.443163 |
| 5601_2_PC finngen_R outcome | 5601_2_PC Inverse va | 40 | -0.01728 | 0.064524 | 0.788839 |
| 5601_2_PC finngen_R outcome | 5601_2_PC Simple mc  | 40 | -0.17596 | 0.175051 | 0.320988 |
| 5601_2_PC finngen_R outcome | 5601_2_PC Weighted   | 40 | -0.10162 | 0.099669 | 0.31421  |
| 5604_30_F finngen_R outcome | 5604_30_F MR Egger   | 4  | -0.41275 | 1.402206 | 0.796227 |
| 5604_30_F finngen_R outcome | 5604_30_F Weighted   | 4  | -0.15564 | 0.413032 | 0.7063   |
| 5604_30_F finngen_R outcome | 5604_30_F Inverse va | 4  | -0.20672 | 0.365133 | 0.571287 |
| 5604_30_F finngen_R outcome | 5604_30_F Simple mc  | 4  | -0.81202 | 0.612044 | 0.276543 |
| 5604_30_F finngen_R outcome | 5604_30_F Weighted   | 4  | 0.128418 | 0.571713 | 0.836705 |
| 5605_77_M finngen_R outcome | 5605_77_M MR Egger   | 5  | -0.07123 | 0.282458 | 0.817198 |
| 5605_77_M finngen_R outcome | 5605_77_M Weighted   | 5  | -0.10491 | 0.205099 | 0.608991 |
| 5605_77_M finngen_R outcome | 5605_77_M Inverse va | 5  | -0.05812 | 0.181416 | 0.748704 |
| 5605_77_M finngen_R outcome | 5605_77_M Simple mc  | 5  | -0.07371 | 0.343263 | 0.840483 |
| 5605_77_M finngen_R outcome | 5605_77_M Weighted   | 5  | -0.10457 | 0.237119 | 0.682003 |
| 5609_92_F finngen_R outcome | 5609_92_F Wald ratio | 1  | -0.87492 | 0.704757 | 0.214441 |
| 5618_50_F finngen_R outcome | 5618_50_F MR Egger   | 16 | -0.0266  | 0.163412 | 0.87304  |
| 5618_50_F finngen_R outcome | 5618_50_F Weighted   | 16 | 0.013909 | 0.141237 | 0.921551 |
| 5618_50_F finngen_R outcome | 5618_50_F Inverse va | 16 | 0.081276 | 0.109537 | 0.45809  |
| 5618_50_F finngen_R outcome | 5618_50_F Simple mc  | 16 | -0.22999 | 0.267529 | 0.403502 |
| 5618_50_F finngen_R outcome | 5618_50_F Weighted   | 16 | 0.01186  | 0.151423 | 0.938607 |
| 5620_13_F finngen_R outcome | 5620_13_F MR Egger   | 82 | -0.00326 | 0.046524 | 0.944323 |
| 5620_13_F finngen_R outcome | 5620_13_F Weighted   | 82 | -0.00535 | 0.04089  | 0.895906 |
| 5620_13_F finngen_R outcome | 5620_13_F Inverse va | 82 | -0.00125 | 0.02786  | 0.964154 |
| 5620_13_F finngen_R outcome | 5620_13_F Simple mc  | 82 | 0.077562 | 0.058149 | 0.185994 |
| 5620_13_F finngen_R outcome | 5620_13_F Weighted   | 82 | -0.00742 | 0.036965 | 0.84134  |
| 5621_64_T finngen_R outcome | 5621_64_T MR Egger   | 35 | 0.059059 | 0.078287 | 0.455964 |
| 5621_64_T finngen_R outcome | 5621_64_T Weighted   | 35 | -0.04838 | 0.075665 | 0.522549 |
| 5621_64_T finngen_R outcome | 5621_64_T Inverse va | 35 | 0.01953  | 0.055318 | 0.724057 |
| 5621_64_T finngen_R outcome | 5621_64_T Simple mc  | 35 | -0.17745 | 0.161125 | 0.278499 |
| 5621_64_T finngen_R outcome | 5621_64_T Weighted   | 35 | -0.02975 | 0.074338 | 0.691509 |
| 5628_21_S finngen_R outcome | 5628_21_S MR Egger   | 22 | 0.049955 | 0.187718 | 0.792874 |
| 5628_21_S finngen_R outcome | 5628_21_S Weighted   | 22 | -0.06964 | 0.13085  | 0.594597 |
| 5628_21_S finngen_R outcome | 5628_21_S Inverse va | 22 | -0.01515 | 0.09647  | 0.875209 |
| 5628_21_S finngen_R outcome | 5628_21_S Simple mc  | 22 | -0.08333 | 0.204364 | 0.687579 |
| 5628_21_S finngen_R outcome | 5628_21_S Weighted   | 22 | -0.05771 | 0.133715 | 0.670454 |
| 5630_48_C finngen_R outcome | 5630_48_C MR Egger   | 94 | -0.14966 | 0.055514 | 0.008348 |
| 5630_48_C finngen_R outcome | 5630_48_C Weighted   | 94 | -0.12585 | 0.062269 | 0.043277 |
| 5630_48_C finngen_R outcome | 5630_48_C Inverse va | 94 | -0.09697 | 0.035837 | 0.00681  |
| 5630_48_C finngen_R outcome | 5630_48_C Simple mc  | 94 | -0.17935 | 0.114848 | 0.12177  |
| 5630_48_C finngen_R outcome | 5630_48_C Weighted   | 94 | -0.13406 | 0.045838 | 0.004333 |
| 5631_83_M finngen_R outcome | 5631_83_M MR Egger   | 15 | 0.198802 | 0.370145 | 0.600276 |
| 5631_83_M finngen_R outcome | 5631_83_M Weighted   | 15 | -0.18135 | 0.219728 | 0.409184 |
| 5631_83_M finngen_R outcome | 5631_83_M Inverse va | 15 | -0.05294 | 0.162515 | 0.744603 |
| 5631_83_M finngen_R outcome | 5631_83_M Simple mc  | 15 | -0.1357  | 0.323976 | 0.681679 |
| 5631_83_M finngen_R outcome | 5631_83_M Weighted   | 15 | -0.19378 | 0.286751 | 0.5102   |
| 5632_6_Cf finngen_R outcome | 5632_6_Cf MR Egger   | 53 | -0.1792  | 0.110925 | 0.112371 |
| 5632_6_Cf finngen_R outcome | 5632_6_Cf Weighted   | 53 | -0.10631 | 0.084652 | 0.209162 |
| 5632_6_Cf finngen_R outcome | 5632_6_Cf Inverse va | 53 | -0.08858 | 0.059853 | 0.138899 |
| 5632_6_Cf finngen_R outcome | 5632_6_Cf Simple mc  | 53 | 0.237453 | 0.194681 | 0.228082 |
| 5632_6_Cf finngen_R outcome | 5632_6_Cf Weighted   | 53 | -0.06955 | 0.081451 | 0.397119 |
| 5636_10_M finngen_R outcome | 5636_10_M MR Egger   | 12 | 0.342796 | 0.163305 | 0.062169 |
| 5636_10_M finngen_R outcome | 5636_10_M Weighted   | 12 | 0.235911 | 0.149681 | 0.115005 |
| 5636_10_M finngen_R outcome | 5636_10_M Inverse va | 12 | 0.092789 | 0.136554 | 0.496817 |
| 5636_10_M finngen_R outcome | 5636_10_M Simple mc  | 12 | 0.15264  | 0.268624 | 0.581293 |
| 5636_10_M finngen_R outcome | 5636_10_M Weighted   | 12 | 0.223452 | 0.13763  | 0.132753 |
| 5637_81_M finngen_R outcome | 5637_81_M MR Egger   | 70 | -0.06028 | 0.051615 | 0.246903 |
| 5637_81_M finngen_R outcome | 5637_81_M Weighted   | 70 | -0.05472 | 0.046726 | 0.241556 |
| 5637_81_M finngen_R outcome | 5637_81_M Inverse va | 70 | -0.03774 | 0.034635 | 0.275857 |

|                            |                     |     |          |          |          |
|----------------------------|---------------------|-----|----------|----------|----------|
| 5637_81_↑finngen_R outcome | 5637_81_↑Simple mc  | 70  | -0.04402 | 0.082378 | 0.594772 |
| 5637_81_↑finngen_R outcome | 5637_81_↑Weighted   | 70  | -0.04402 | 0.039986 | 0.274729 |
| 5644_60_↓finngen_R outcome | 5644_60_↓MR Egger   | 40  | -0.19461 | 0.112539 | 0.091886 |
| 5644_60_↓finngen_R outcome | 5644_60_↓Weighted   | 40  | -0.10184 | 0.090052 | 0.258097 |
| 5644_60_↓finngen_R outcome | 5644_60_↓Inverse va | 40  | -0.08812 | 0.062324 | 0.157387 |
| 5644_60_↓finngen_R outcome | 5644_60_↓Simple mc  | 40  | 0.050086 | 0.169398 | 0.769052 |
| 5644_60_↓finngen_R outcome | 5644_60_↓Weighted   | 40  | -0.11394 | 0.091103 | 0.218499 |
| 5646_20_↓finngen_R outcome | 5646_20_↓MR Egger   | 150 | -0.16205 | 0.041718 | 0.000154 |
| 5646_20_↓finngen_R outcome | 5646_20_↓Weighted   | 150 | -0.1252  | 0.040594 | 0.002042 |
| 5646_20_↓finngen_R outcome | 5646_20_↓Inverse va | 150 | -0.11669 | 0.02594  | 6.84E-06 |
| 5646_20_↓finngen_R outcome | 5646_20_↓Simple mc  | 150 | -0.13774 | 0.073136 | 0.061611 |
| 5646_20_↓finngen_R outcome | 5646_20_↓Weighted   | 150 | -0.12316 | 0.038774 | 0.001813 |
| 5648_28_↘finngen_R outcome | 5648_28_↘MR Egger   | 106 | -0.00714 | 0.040137 | 0.859136 |
| 5648_28_↘finngen_R outcome | 5648_28_↘Weighted   | 106 | -0.00537 | 0.040417 | 0.89427  |
| 5648_28_↘finngen_R outcome | 5648_28_↘Inverse va | 106 | 0.031948 | 0.025409 | 0.208626 |
| 5648_28_↘finngen_R outcome | 5648_28_↘Simple mc  | 106 | 0.081774 | 0.075721 | 0.282645 |
| 5648_28_↘finngen_R outcome | 5648_28_↘Weighted   | 106 | -0.00743 | 0.036537 | 0.839353 |
| 5656_53_↗finngen_R outcome | 5656_53_↗Inverse va | 2   | 0.123221 | 0.469429 | 0.792943 |
| 5657_28_↘finngen_R outcome | 5657_28_↘MR Egger   | 29  | 0.124863 | 0.161747 | 0.446843 |
| 5657_28_↘finngen_R outcome | 5657_28_↘Weighted   | 29  | 0.000431 | 0.121552 | 0.997169 |
| 5657_28_↘finngen_R outcome | 5657_28_↘Inverse va | 29  | -0.02091 | 0.079827 | 0.793384 |
| 5657_28_↘finngen_R outcome | 5657_28_↘Simple mc  | 29  | 0.095798 | 0.210802 | 0.653012 |
| 5657_28_↘finngen_R outcome | 5657_28_↘Weighted   | 29  | 0.06044  | 0.118044 | 0.612655 |
| 5658_64_↓finngen_R outcome | 5658_64_↓MR Egger   | 37  | 0.139841 | 0.10448  | 0.18938  |
| 5658_64_↓finngen_R outcome | 5658_64_↓Weighted   | 37  | -0.00704 | 0.089939 | 0.937637 |
| 5658_64_↓finngen_R outcome | 5658_64_↓Inverse va | 37  | -0.0218  | 0.057849 | 0.706231 |
| 5658_64_↓finngen_R outcome | 5658_64_↓Simple mc  | 37  | -0.04821 | 0.160465 | 0.765577 |
| 5658_64_↓finngen_R outcome | 5658_64_↓Weighted   | 37  | 0.001167 | 0.08443  | 0.98905  |
| 5660_51_↘finngen_R outcome | 5660_51_↘MR Egger   | 91  | 0.016643 | 0.058792 | 0.77777  |
| 5660_51_↘finngen_R outcome | 5660_51_↘Weighted   | 91  | 0.017511 | 0.055548 | 0.752575 |
| 5660_51_↘finngen_R outcome | 5660_51_↘Inverse va | 91  | 0.000561 | 0.037964 | 0.988206 |
| 5660_51_↘finngen_R outcome | 5660_51_↘Simple mc  | 91  | 0.013758 | 0.097745 | 0.888377 |
| 5660_51_↘finngen_R outcome | 5660_51_↘Weighted   | 91  | 0.022442 | 0.06046  | 0.711368 |
| 5663_18_↓finngen_R outcome | 5663_18_↓MR Egger   | 21  | -0.11818 | 0.130935 | 0.378034 |
| 5663_18_↓finngen_R outcome | 5663_18_↓Weighted   | 21  | -0.12443 | 0.108202 | 0.250153 |
| 5663_18_↓finngen_R outcome | 5663_18_↓Inverse va | 21  | -0.07573 | 0.076265 | 0.320706 |
| 5663_18_↓finngen_R outcome | 5663_18_↓Simple mc  | 21  | 0.063568 | 0.218917 | 0.774517 |
| 5663_18_↓finngen_R outcome | 5663_18_↓Weighted   | 21  | -0.16383 | 0.105659 | 0.1367   |
| 5671_1_↘finngen_R outcome  | 5671_1_↘MR Egger    | 53  | 0.057409 | 0.083408 | 0.494384 |
| 5671_1_↘finngen_R outcome  | 5671_1_↘Weighted    | 53  | 0.108484 | 0.075995 | 0.153428 |
| 5671_1_↘finngen_R outcome  | 5671_1_↘Inverse va  | 53  | 0.080152 | 0.052714 | 0.128379 |
| 5671_1_↘finngen_R outcome  | 5671_1_↘Simple mc   | 53  | 0.15039  | 0.152256 | 0.327852 |
| 5671_1_↘finngen_R outcome  | 5671_1_↘Weighted    | 53  | 0.126056 | 0.0821   | 0.13075  |
| 5676_54_↘finngen_R outcome | 5676_54_↘MR Egger   | 20  | -0.20539 | 0.143943 | 0.170729 |
| 5676_54_↘finngen_R outcome | 5676_54_↘Weighted   | 20  | -0.19676 | 0.116931 | 0.092437 |
| 5676_54_↘finngen_R outcome | 5676_54_↘Inverse va | 20  | -0.17943 | 0.082072 | 0.028799 |
| 5676_54_↘finngen_R outcome | 5676_54_↘Simple mc  | 20  | -0.13428 | 0.186043 | 0.479211 |
| 5676_54_↘finngen_R outcome | 5676_54_↘Weighted   | 20  | -0.16062 | 0.138434 | 0.260314 |
| 5680_54_↘finngen_R outcome | 5680_54_↘MR Egger   | 35  | 0.052928 | 0.139086 | 0.705983 |
| 5680_54_↘finngen_R outcome | 5680_54_↘Weighted   | 35  | -0.13211 | 0.092887 | 0.154947 |
| 5680_54_↘finngen_R outcome | 5680_54_↘Inverse va | 35  | -0.12046 | 0.085676 | 0.15974  |
| 5680_54_↘finngen_R outcome | 5680_54_↘Simple mc  | 35  | 0.041734 | 0.241417 | 0.863777 |
| 5680_54_↘finngen_R outcome | 5680_54_↘Weighted   | 35  | -0.06838 | 0.096951 | 0.48545  |
| 5682_13_↘finngen_R outcome | 5682_13_↘MR Egger   | 3   | 1.481349 | 1.357318 | 0.472201 |
| 5682_13_↘finngen_R outcome | 5682_13_↘Weighted   | 3   | 0.071776 | 0.378744 | 0.849693 |
| 5682_13_↘finngen_R outcome | 5682_13_↘Inverse va | 3   | 0.20448  | 0.353652 | 0.563132 |
| 5682_13_↘finngen_R outcome | 5682_13_↘Simple mc  | 3   | 0.069536 | 0.493861 | 0.900928 |
| 5682_13_↘finngen_R outcome | 5682_13_↘Weighted   | 3   | 0.05154  | 0.434675 | 0.916451 |



|                              |                       |    |          |          |          |
|------------------------------|-----------------------|----|----------|----------|----------|
| 5687_5_Pf finngen_R outcome  | 5687_5_Pf MR Egger    | 3  | -0.07147 | 1.609804 | 0.971753 |
| 5687_5_Pf finngen_R outcome  | 5687_5_Pf Weighted    | 3  | -0.41018 | 0.33818  | 0.225171 |
| 5687_5_Pf finngen_R outcome  | 5687_5_Pf Inverse va  | 3  | -0.44274 | 0.340949 | 0.1941   |
| 5687_5_Pf finngen_R outcome  | 5687_5_Pf Simple mc   | 3  | -0.23872 | 0.5134   | 0.687657 |
| 5687_5_Pf finngen_R outcome  | 5687_5_Pf Weighted    | 3  | -0.39748 | 0.346669 | 0.370232 |
| 5688_65_C finngen_R outcome  | 5688_65_C MR Egger    | 35 | 0.071448 | 0.333565 | 0.831714 |
| 5688_65_C finngen_R outcome  | 5688_65_C Weighted    | 35 | 0.091433 | 0.125198 | 0.465204 |
| 5688_65_C finngen_R outcome  | 5688_65_C Inverse va  | 35 | 0.134046 | 0.107456 | 0.212232 |
| 5688_65_C finngen_R outcome  | 5688_65_C Simple mc   | 35 | 0.23581  | 0.195139 | 0.235223 |
| 5688_65_C finngen_R outcome  | 5688_65_C Weighted    | 35 | 0.193998 | 0.146586 | 0.19452  |
| 5691_2_Cf finngen_R outcome  | 5691_2_Cf MR Egger    | 43 | 0.190264 | 0.115255 | 0.10642  |
| 5691_2_Cf finngen_R outcome  | 5691_2_Cf Weighted    | 43 | 0.018321 | 0.096949 | 0.850111 |
| 5691_2_Cf finngen_R outcome  | 5691_2_Cf Inverse va  | 43 | 0.071555 | 0.063592 | 0.2605   |
| 5691_2_Cf finngen_R outcome  | 5691_2_Cf Simple mc   | 43 | -0.05828 | 0.165605 | 0.726649 |
| 5691_2_Cf finngen_R outcome  | 5691_2_Cf Weighted    | 43 | -0.00639 | 0.101324 | 0.949991 |
| 5701_81_C finngen_R outcome  | 5701_81_C MR Egger    | 18 | -0.03369 | 0.28301  | 0.906722 |
| 5701_81_C finngen_R outcome  | 5701_81_C Weighted    | 18 | 0.114463 | 0.178475 | 0.521301 |
| 5701_81_C finngen_R outcome  | 5701_81_C Inverse va  | 18 | 0.143031 | 0.121786 | 0.240219 |
| 5701_81_C finngen_R outcome  | 5701_81_C Simple mc   | 18 | 0.146399 | 0.307385 | 0.639945 |
| 5701_81_C finngen_R outcome  | 5701_81_C Weighted    | 18 | 0.146399 | 0.187942 | 0.446713 |
| 5704_74_C finngen_R outcome  | 5704_74_C MR Egger    | 3  | -0.77473 | 3.781463 | 0.871352 |
| 5704_74_C finngen_R outcome  | 5704_74_C Weighted    | 3  | -0.24016 | 0.538515 | 0.655619 |
| 5704_74_C finngen_R outcome  | 5704_74_C Inverse va  | 3  | -0.34676 | 0.580652 | 0.550383 |
| 5704_74_C finngen_R outcome  | 5704_74_C Simple mc   | 3  | 0.010017 | 0.801888 | 0.991167 |
| 5704_74_C finngen_R outcome  | 5704_74_C Weighted    | 3  | 0.17079  | 0.939859 | 0.872554 |
| 5708_1_LE finngen_R outcome  | 5708_1_LE MR Egger    | 37 | 0.136841 | 0.131383 | 0.304767 |
| 5708_1_LE finngen_R outcome  | 5708_1_LE Weighted    | 37 | 0.12876  | 0.117354 | 0.272555 |
| 5708_1_LE finngen_R outcome  | 5708_1_LE Inverse va  | 37 | 0.108522 | 0.075698 | 0.151679 |
| 5708_1_LE finngen_R outcome  | 5708_1_LE Simple mc   | 37 | 0.030475 | 0.20451  | 0.882372 |
| 5708_1_LE finngen_R outcome  | 5708_1_LE Weighted    | 37 | 0.123524 | 0.112181 | 0.278157 |
| 5713_9_IFI finngen_R outcome | 5713_9_IFI Wald ratio | 1  | 0.006829 | 0.710765 | 0.992335 |
| 5722_78_F finngen_R outcome  | 5722_78_F MR Egger    | 14 | -0.35618 | 0.289802 | 0.242613 |
| 5722_78_F finngen_R outcome  | 5722_78_F Weighted    | 14 | -0.0395  | 0.178614 | 0.824966 |
| 5722_78_F finngen_R outcome  | 5722_78_F Inverse va  | 14 | 0.208995 | 0.13749  | 0.128493 |
| 5722_78_F finngen_R outcome  | 5722_78_F Simple mc   | 14 | 0.062259 | 0.349361 | 0.861307 |
| 5722_78_F finngen_R outcome  | 5722_78_F Weighted    | 14 | 0.003427 | 0.213279 | 0.987423 |
| 5728_60_F finngen_R outcome  | 5728_60_F MR Egger    | 55 | 0.037109 | 0.102647 | 0.719144 |
| 5728_60_F finngen_R outcome  | 5728_60_F Weighted    | 55 | -0.04612 | 0.088195 | 0.601034 |
| 5728_60_F finngen_R outcome  | 5728_60_F Inverse va  | 55 | -0.05926 | 0.054142 | 0.273706 |
| 5728_60_F finngen_R outcome  | 5728_60_F Simple mc   | 55 | -0.32634 | 0.15344  | 0.038019 |
| 5728_60_F finngen_R outcome  | 5728_60_F Weighted    | 55 | -0.05025 | 0.078535 | 0.524989 |
| 5731_1_SF finngen_R outcome  | 5731_1_SF MR Egger    | 64 | -0.07225 | 0.046159 | 0.122616 |
| 5731_1_SF finngen_R outcome  | 5731_1_SF Weighted    | 64 | -0.05169 | 0.047737 | 0.278924 |
| 5731_1_SF finngen_R outcome  | 5731_1_SF Inverse va  | 64 | -0.05406 | 0.034153 | 0.113472 |
| 5731_1_SF finngen_R outcome  | 5731_1_SF Simple mc   | 64 | -0.10262 | 0.102953 | 0.322685 |
| 5731_1_SF finngen_R outcome  | 5731_1_SF Weighted    | 64 | -0.06508 | 0.040598 | 0.113916 |
| 5734_13_F finngen_R outcome  | 5734_13_F Wald ratio  | 1  | -1.17577 | 0.649934 | 0.070441 |
| 5737_61_S finngen_R outcome  | 5737_61_S MR Egger    | 65 | 0.019126 | 0.045844 | 0.677958 |
| 5737_61_S finngen_R outcome  | 5737_61_S Weighted    | 65 | 0.055777 | 0.045137 | 0.216557 |
| 5737_61_S finngen_R outcome  | 5737_61_S Inverse va  | 65 | 0.042177 | 0.029943 | 0.158965 |
| 5737_61_S finngen_R outcome  | 5737_61_S Simple mc   | 65 | 0.046992 | 0.073088 | 0.522553 |
| 5737_61_S finngen_R outcome  | 5737_61_S Weighted    | 65 | 0.046992 | 0.03808  | 0.221705 |
| 5742_14_f finngen_R outcome  | 5742_14_f MR Egger    | 82 | 0.001099 | 0.049841 | 0.982455 |
| 5742_14_f finngen_R outcome  | 5742_14_f Weighted    | 82 | -0.04973 | 0.043004 | 0.247567 |
| 5742_14_f finngen_R outcome  | 5742_14_f Inverse va  | 82 | -0.08458 | 0.025991 | 0.001137 |
| 5742_14_f finngen_R outcome  | 5742_14_f Simple mc   | 82 | -0.03821 | 0.073172 | 0.602998 |
| 5742_14_f finngen_R outcome  | 5742_14_f Weighted    | 82 | -0.06103 | 0.043686 | 0.166243 |
| 5749_53_C finngen_R outcome  | 5749_53_C MR Egger    | 79 | 0.029237 | 0.104398 | 0.780185 |

|                              |                       |    |          |          |          |
|------------------------------|-----------------------|----|----------|----------|----------|
| 5749_53_C finngen_R outcome  | 5749_53_C Weighted    | 79 | -0.00711 | 0.081647 | 0.930619 |
| 5749_53_C finngen_R outcome  | 5749_53_C Inverse va  | 79 | -0.01454 | 0.055404 | 0.792997 |
| 5749_53_C finngen_R outcome  | 5749_53_C Simple mc   | 79 | -0.14488 | 0.146226 | 0.324847 |
| 5749_53_C finngen_R outcome  | 5749_53_C Weighted    | 79 | 0.016669 | 0.081277 | 0.838034 |
| 5763_67_L finngen_R outcome  | 5763_67_L MR Egger    | 22 | -0.05339 | 0.312919 | 0.866227 |
| 5763_67_L finngen_R outcome  | 5763_67_L Weighted    | 22 | -0.16533 | 0.206424 | 0.423171 |
| 5763_67_L finngen_R outcome  | 5763_67_L Inverse va  | 22 | -0.04791 | 0.154956 | 0.757164 |
| 5763_67_L finngen_R outcome  | 5763_67_L Simple mc   | 22 | -0.18968 | 0.370857 | 0.614356 |
| 5763_67_L finngen_R outcome  | 5763_67_L Weighted    | 22 | -0.15099 | 0.320975 | 0.642921 |
| 5803_24_C finngen_R outcome  | 5803_24_C MR Egger    | 3  | -0.25984 | 4.061469 | 0.959326 |
| 5803_24_C finngen_R outcome  | 5803_24_C Weighted    | 3  | 0.526365 | 0.284653 | 0.064437 |
| 5803_24_C finngen_R outcome  | 5803_24_C Inverse va  | 3  | 0.4687   | 0.245191 | 0.055931 |
| 5803_24_C finngen_R outcome  | 5803_24_C Simple mc   | 3  | 0.578368 | 0.333993 | 0.22547  |
| 5803_24_C finngen_R outcome  | 5803_24_C Weighted    | 3  | 0.569648 | 0.353391 | 0.248292 |
| 5810_25_T finngen_R outcome  | 5810_25_T MR Egger    | 88 | -0.04218 | 0.030609 | 0.171731 |
| 5810_25_T finngen_R outcome  | 5810_25_T Weighted    | 88 | -0.00418 | 0.029888 | 0.888894 |
| 5810_25_T finngen_R outcome  | 5810_25_T Inverse va  | 88 | 0.020378 | 0.017958 | 0.256456 |
| 5810_25_T finngen_R outcome  | 5810_25_T Simple mc   | 88 | 0.093551 | 0.065924 | 0.159448 |
| 5810_25_T finngen_R outcome  | 5810_25_T Weighted    | 88 | -0.00362 | 0.025332 | 0.886746 |
| 5825_49_II finngen_R outcome | 5825_49_II Inverse va | 2  | 0.629596 | 0.525708 | 0.231067 |
| 5834_18_II finngen_R outcome | 5834_18_II Wald ratio | 1  | 0.263199 | 0.636202 | 0.679091 |
| 5837_49_L finngen_R outcome  | 5837_49_L MR Egger    | 18 | -0.01371 | 0.291447 | 0.963053 |
| 5837_49_L finngen_R outcome  | 5837_49_L Weighted    | 18 | -0.27789 | 0.159544 | 0.08155  |
| 5837_49_L finngen_R outcome  | 5837_49_L Inverse va  | 18 | -0.21131 | 0.145371 | 0.146059 |
| 5837_49_L finngen_R outcome  | 5837_49_L Simple mc   | 18 | -0.40064 | 0.282999 | 0.174922 |
| 5837_49_L finngen_R outcome  | 5837_49_L Weighted    | 18 | -0.34325 | 0.163543 | 0.051077 |
| 5852_6_S1 finngen_R outcome  | 5852_6_S1 MR Egger    | 11 | -0.10654 | 0.266269 | 0.69839  |
| 5852_6_S1 finngen_R outcome  | 5852_6_S1 Weighted    | 11 | -0.27977 | 0.158923 | 0.078334 |
| 5852_6_S1 finngen_R outcome  | 5852_6_S1 Inverse va  | 11 | -0.27446 | 0.135012 | 0.042065 |
| 5852_6_S1 finngen_R outcome  | 5852_6_S1 Simple mc   | 11 | -0.42228 | 0.287369 | 0.172447 |
| 5852_6_S1 finngen_R outcome  | 5852_6_S1 Weighted    | 11 | -0.29408 | 0.166414 | 0.107651 |
| 5939_42_T finngen_R outcome  | 5939_42_T MR Egger    | 30 | 0.16379  | 0.117682 | 0.174942 |
| 5939_42_T finngen_R outcome  | 5939_42_T Weighted    | 30 | 0.064773 | 0.097741 | 0.507522 |
| 5939_42_T finngen_R outcome  | 5939_42_T Inverse va  | 30 | -0.01334 | 0.066541 | 0.841059 |
| 5939_42_T finngen_R outcome  | 5939_42_T Simple mc   | 30 | -0.01506 | 0.16926  | 0.929707 |
| 5939_42_T finngen_R outcome  | 5939_42_T Weighted    | 30 | 0.083015 | 0.087333 | 0.349682 |
| 5963_9_DI finngen_R outcome  | 5963_9_DI MR Egger    | 4  | -1.46758 | 1.102149 | 0.314488 |
| 5963_9_DI finngen_R outcome  | 5963_9_DI Weighted    | 4  | 0.00991  | 0.389379 | 0.979696 |
| 5963_9_DI finngen_R outcome  | 5963_9_DI Inverse va  | 4  | 0.295855 | 0.415591 | 0.476534 |
| 5963_9_DI finngen_R outcome  | 5963_9_DI Simple mc   | 4  | -0.12473 | 0.507315 | 0.821652 |
| 5963_9_DI finngen_R outcome  | 5963_9_DI Weighted    | 4  | -0.10372 | 0.444083 | 0.830361 |
| 5980_55_E finngen_R outcome  | 5980_55_E Inverse va  | 2  | 0.514082 | 0.265707 | 0.053019 |
| 5988_49_T finngen_R outcome  | 5988_49_T Wald ratio  | 1  | -0.95735 | 0.646528 | 0.13867  |
| 6039_24_C finngen_R outcome  | 6039_24_C MR Egger    | 83 | 0.064019 | 0.068814 | 0.35497  |
| 6039_24_C finngen_R outcome  | 6039_24_C Weighted    | 83 | 0.011625 | 0.067426 | 0.863113 |
| 6039_24_C finngen_R outcome  | 6039_24_C Inverse va  | 83 | -0.04597 | 0.039864 | 0.248812 |
| 6039_24_C finngen_R outcome  | 6039_24_C Simple mc   | 83 | 0.011285 | 0.113107 | 0.92077  |
| 6039_24_C finngen_R outcome  | 6039_24_C Weighted    | 83 | 0.022142 | 0.063542 | 0.728388 |
| 6049_64_F finngen_R outcome  | 6049_64_F MR Egger    | 3  | -0.11089 | 0.535415 | 0.869993 |
| 6049_64_F finngen_R outcome  | 6049_64_F Weighted    | 3  | 0.092646 | 0.262417 | 0.724051 |
| 6049_64_F finngen_R outcome  | 6049_64_F Inverse va  | 3  | 0.114559 | 0.25199  | 0.649384 |
| 6049_64_F finngen_R outcome  | 6049_64_F Simple mc   | 3  | 0.20224  | 0.388638 | 0.654671 |
| 6049_64_F finngen_R outcome  | 6049_64_F Weighted    | 3  | 0.045393 | 0.312296 | 0.897758 |
| 6060_2_PI finngen_R outcome  | 6060_2_PI MR Egger    | 46 | 0.059199 | 0.058204 | 0.314667 |
| 6060_2_PI finngen_R outcome  | 6060_2_PI Weighted    | 46 | 0.113907 | 0.068725 | 0.097431 |
| 6060_2_PI finngen_R outcome  | 6060_2_PI Inverse va  | 46 | 0.048132 | 0.041937 | 0.251079 |
| 6060_2_PI finngen_R outcome  | 6060_2_PI Simple mc   | 46 | 0.126988 | 0.127836 | 0.325845 |
| 6060_2_PI finngen_R outcome  | 6060_2_PI Weighted    | 46 | 0.070127 | 0.057535 | 0.229243 |

|                              |                       |     |          |          |          |
|------------------------------|-----------------------|-----|----------|----------|----------|
| 6077_63_C finngen_R outcome  | 6077_63_C MR Egger    | 78  | 0.117448 | 0.072266 | 0.108253 |
| 6077_63_C finngen_R outcome  | 6077_63_C Weighted    | 78  | 0.05081  | 0.060107 | 0.397932 |
| 6077_63_C finngen_R outcome  | 6077_63_C Inverse va  | 78  | 0.089619 | 0.039284 | 0.022531 |
| 6077_63_C finngen_R outcome  | 6077_63_C Simple mc   | 78  | 0.041438 | 0.115528 | 0.720814 |
| 6077_63_C finngen_R outcome  | 6077_63_C Weighted    | 78  | 0.033228 | 0.065657 | 0.614245 |
| 6081_52_F finngen_R outcome  | 6081_52_F MR Egger    | 74  | 0.07368  | 0.068346 | 0.284608 |
| 6081_52_F finngen_R outcome  | 6081_52_F Weighted    | 74  | 0.079085 | 0.07213  | 0.272898 |
| 6081_52_F finngen_R outcome  | 6081_52_F Inverse va  | 74  | 0.103914 | 0.043206 | 0.016168 |
| 6081_52_F finngen_R outcome  | 6081_52_F Simple mc   | 74  | 0.068531 | 0.129404 | 0.598006 |
| 6081_52_F finngen_R outcome  | 6081_52_F Weighted    | 74  | 0.068531 | 0.070527 | 0.334414 |
| 6086_15_C finngen_R outcome  | 6086_15_C MR Egger    | 26  | 0.341849 | 0.129475 | 0.014334 |
| 6086_15_C finngen_R outcome  | 6086_15_C Weighted    | 26  | 0.225305 | 0.10832  | 0.037526 |
| 6086_15_C finngen_R outcome  | 6086_15_C Inverse va  | 26  | 0.234723 | 0.072287 | 0.001166 |
| 6086_15_C finngen_R outcome  | 6086_15_C Simple mc   | 26  | 0.321581 | 0.164212 | 0.061438 |
| 6086_15_C finngen_R outcome  | 6086_15_C Weighted    | 26  | 0.224428 | 0.107678 | 0.047511 |
| 6151_18_I finngen_R outcome  | 6151_18_I Wald ratio  | 1   | -1.19419 | 0.781712 | 0.126596 |
| 6207_10_F finngen_R outcome  | 6207_10_F MR Egger    | 43  | 0.015252 | 0.105036 | 0.885256 |
| 6207_10_F finngen_R outcome  | 6207_10_F Weighted    | 43  | 0.003906 | 0.084372 | 0.963074 |
| 6207_10_F finngen_R outcome  | 6207_10_F Inverse va  | 43  | 0.074399 | 0.054202 | 0.169871 |
| 6207_10_F finngen_R outcome  | 6207_10_F Simple mc   | 43  | -0.03785 | 0.147285 | 0.798455 |
| 6207_10_F finngen_R outcome  | 6207_10_F Weighted    | 43  | -0.00382 | 0.07953  | 0.961935 |
| 6223_5_GI finngen_R outcome  | 6223_5_GI MR Egger    | 7   | 0.343163 | 0.398684 | 0.428716 |
| 6223_5_GI finngen_R outcome  | 6223_5_GI Weighted    | 7   | 0.257076 | 0.233644 | 0.271207 |
| 6223_5_GI finngen_R outcome  | 6223_5_GI Inverse va  | 7   | 0.30553  | 0.19443  | 0.116087 |
| 6223_5_GI finngen_R outcome  | 6223_5_GI Simple mc   | 7   | 0.381693 | 0.346607 | 0.313002 |
| 6223_5_GI finngen_R outcome  | 6223_5_GI Weighted    | 7   | 0.162609 | 0.299298 | 0.606503 |
| 6227_1_KL finngen_R outcome  | 6227_1_KL MR Egger    | 120 | 0.056963 | 0.054138 | 0.294866 |
| 6227_1_KL finngen_R outcome  | 6227_1_KL Weighted    | 120 | 0.068878 | 0.05598  | 0.218543 |
| 6227_1_KL finngen_R outcome  | 6227_1_KL Inverse va  | 120 | 0.039681 | 0.0342   | 0.245945 |
| 6227_1_KL finngen_R outcome  | 6227_1_KL Simple mc   | 120 | -0.16414 | 0.105455 | 0.122238 |
| 6227_1_KL finngen_R outcome  | 6227_1_KL Weighted    | 120 | 0.048804 | 0.047712 | 0.308445 |
| 6234_74_V finngen_R outcome  | 6234_74_V MR Egger    | 76  | 0.155615 | 0.080685 | 0.057607 |
| 6234_74_V finngen_R outcome  | 6234_74_V Weighted    | 76  | 0.049942 | 0.065264 | 0.444133 |
| 6234_74_V finngen_R outcome  | 6234_74_V Inverse va  | 76  | 0.014112 | 0.042349 | 0.738967 |
| 6234_74_V finngen_R outcome  | 6234_74_V Simple mc   | 76  | 0.113543 | 0.127873 | 0.377415 |
| 6234_74_V finngen_R outcome  | 6234_74_V Weighted    | 76  | 0.066911 | 0.068849 | 0.334251 |
| 6245_4_PV finngen_R outcome  | 6245_4_PV Inverse va  | 2   | -0.77382 | 0.58725  | 0.187602 |
| 6247_9_SII finngen_R outcome | 6247_9_SII MR Egger   | 255 | -0.06455 | 0.024973 | 0.010305 |
| 6247_9_SII finngen_R outcome | 6247_9_SII Weighted   | 255 | -0.05451 | 0.029083 | 0.060867 |
| 6247_9_SII finngen_R outcome | 6247_9_SII Inverse va | 255 | -0.04621 | 0.016344 | 0.004698 |
| 6247_9_SII finngen_R outcome | 6247_9_SII Simple mc  | 255 | -0.10611 | 0.054783 | 0.053859 |
| 6247_9_SII finngen_R outcome | 6247_9_SII Weighted   | 255 | -0.06594 | 0.026402 | 0.013135 |
| 6252_62_S finngen_R outcome  | 6252_62_S MR Egger    | 9   | 0.383546 | 0.290189 | 0.227819 |
| 6252_62_S finngen_R outcome  | 6252_62_S Weighted    | 9   | -0.03719 | 0.192047 | 0.84643  |
| 6252_62_S finngen_R outcome  | 6252_62_S Inverse va  | 9   | 0.064649 | 0.151557 | 0.669696 |
| 6252_62_S finngen_R outcome  | 6252_62_S Simple mc   | 9   | -0.08514 | 0.288022 | 0.775072 |
| 6252_62_S finngen_R outcome  | 6252_62_S Weighted    | 9   | -0.02114 | 0.235515 | 0.930668 |
| 6255_74_C finngen_R outcome  | 6255_74_C MR Egger    | 70  | -0.01193 | 0.08159  | 0.884216 |
| 6255_74_C finngen_R outcome  | 6255_74_C Weighted    | 70  | 0.045283 | 0.081988 | 0.580737 |
| 6255_74_C finngen_R outcome  | 6255_74_C Inverse va  | 70  | 0.002735 | 0.049057 | 0.955533 |
| 6255_74_C finngen_R outcome  | 6255_74_C Simple mc   | 70  | 0.048604 | 0.146673 | 0.741362 |
| 6255_74_C finngen_R outcome  | 6255_74_C Weighted    | 70  | 0.033369 | 0.074323 | 0.654864 |
| 6342_10_I finngen_R outcome  | 6342_10_I MR Egger    | 11  | -0.33734 | 0.400697 | 0.421666 |
| 6342_10_I finngen_R outcome  | 6342_10_I Weighted    | 11  | -0.12445 | 0.182369 | 0.494994 |
| 6342_10_I finngen_R outcome  | 6342_10_I Inverse va  | 11  | -0.06535 | 0.146286 | 0.655094 |
| 6342_10_I finngen_R outcome  | 6342_10_I Simple mc   | 11  | 0.305504 | 0.338389 | 0.387852 |
| 6342_10_I finngen_R outcome  | 6342_10_I Weighted    | 11  | -0.10721 | 0.188631 | 0.582333 |
| 6364_7_TF finngen_R outcome  | 6364_7_TF MR Egger    | 137 | -0.0371  | 0.02966  | 0.213181 |

|                              |                       |     |          |          |          |
|------------------------------|-----------------------|-----|----------|----------|----------|
| 6364_7_TA finngen_R outcome  | 6364_7_TA Weighted    | 137 | -0.02524 | 0.033664 | 0.453474 |
| 6364_7_TA finngen_R outcome  | 6364_7_TA Inverse va  | 137 | 0.005371 | 0.019404 | 0.781957 |
| 6364_7_TA finngen_R outcome  | 6364_7_TA Simple mc   | 137 | -0.06802 | 0.053451 | 0.205335 |
| 6364_7_TA finngen_R outcome  | 6364_7_TA Weighted    | 137 | -0.04663 | 0.029016 | 0.110373 |
| 6367_66_FF finngen_R outcome | 6367_66_FF MR Egger   | 10  | 0.007309 | 0.287304 | 0.980327 |
| 6367_66_FF finngen_R outcome | 6367_66_FF Weighted   | 10  | -0.25472 | 0.201374 | 0.20591  |
| 6367_66_FF finngen_R outcome | 6367_66_FF Inverse va | 10  | -0.33744 | 0.180328 | 0.061309 |
| 6367_66_FF finngen_R outcome | 6367_66_FF Simple mc  | 10  | -0.39412 | 0.296223 | 0.216079 |
| 6367_66_FF finngen_R outcome | 6367_66_FF Weighted   | 10  | -0.26087 | 0.196682 | 0.217394 |
| 6373_54_S finngen_R outcome  | 6373_54_S MR Egger    | 73  | -0.03896 | 0.071761 | 0.588919 |
| 6373_54_S finngen_R outcome  | 6373_54_S Weighted    | 73  | 0.058588 | 0.060123 | 0.329826 |
| 6373_54_S finngen_R outcome  | 6373_54_S Inverse va  | 73  | 0.021088 | 0.038418 | 0.583063 |
| 6373_54_S finngen_R outcome  | 6373_54_S Simple mc   | 73  | -0.00871 | 0.104812 | 0.933975 |
| 6373_54_S finngen_R outcome  | 6373_54_S Weighted    | 73  | 0.034365 | 0.052817 | 0.517342 |
| 6382_17_M finngen_R outcome  | 6382_17_M MR Egger    | 57  | 0.000298 | 0.090181 | 0.997375 |
| 6382_17_M finngen_R outcome  | 6382_17_M Weighted    | 57  | 0.020592 | 0.0725   | 0.776391 |
| 6382_17_M finngen_R outcome  | 6382_17_M Inverse va  | 57  | -0.06791 | 0.047824 | 0.155607 |
| 6382_17_M finngen_R outcome  | 6382_17_M Simple mc   | 57  | -0.07912 | 0.13464  | 0.559152 |
| 6382_17_M finngen_R outcome  | 6382_17_M Weighted    | 57  | 0.006827 | 0.068464 | 0.920925 |
| 6383_90_T finngen_R outcome  | 6383_90_T Wald ratio  | 1   | 0.651643 | 0.623399 | 0.295881 |
| 6385_63_\ finngen_R outcome  | 6385_63_\ MR Egger    | 38  | -0.02027 | 0.082617 | 0.807565 |
| 6385_63_\ finngen_R outcome  | 6385_63_\ Weighted    | 38  | 0.010525 | 0.078925 | 0.893913 |
| 6385_63_\ finngen_R outcome  | 6385_63_\ Inverse va  | 38  | -0.03011 | 0.062606 | 0.630512 |
| 6385_63_\ finngen_R outcome  | 6385_63_\ Simple mc   | 38  | 0.243221 | 0.189838 | 0.208094 |
| 6385_63_\ finngen_R outcome  | 6385_63_\ Weighted    | 38  | 0.007197 | 0.075486 | 0.924559 |
| 6392_7_W finngen_R outcome   | 6392_7_W MR Egger     | 67  | 0.11206  | 0.09834  | 0.258669 |
| 6392_7_W finngen_R outcome   | 6392_7_W Weighted     | 67  | -0.02149 | 0.075512 | 0.775941 |
| 6392_7_W finngen_R outcome   | 6392_7_W Inverse va   | 67  | 0.082722 | 0.049657 | 0.095743 |
| 6392_7_W finngen_R outcome   | 6392_7_W Simple mc    | 67  | -0.00294 | 0.139788 | 0.983278 |
| 6392_7_W finngen_R outcome   | 6392_7_W Weighted     | 67  | -0.03623 | 0.091954 | 0.694876 |
| 6393_63_F finngen_R outcome  | 6393_63_F MR Egger    | 119 | -0.00968 | 0.055084 | 0.860846 |
| 6393_63_F finngen_R outcome  | 6393_63_F Weighted    | 119 | -0.02817 | 0.050111 | 0.573961 |
| 6393_63_F finngen_R outcome  | 6393_63_F Inverse va  | 119 | 0.030411 | 0.030945 | 0.325732 |
| 6393_63_F finngen_R outcome  | 6393_63_F Simple mc   | 119 | -0.05118 | 0.090581 | 0.573164 |
| 6393_63_F finngen_R outcome  | 6393_63_F Weighted    | 119 | -0.02387 | 0.055627 | 0.668614 |
| 6404_20_C finngen_R outcome  | 6404_20_C MR Egger    | 23  | -0.04018 | 0.206333 | 0.847475 |
| 6404_20_C finngen_R outcome  | 6404_20_C Weighted    | 23  | 0.127822 | 0.130959 | 0.32904  |
| 6404_20_C finngen_R outcome  | 6404_20_C Inverse va  | 23  | -0.00238 | 0.10364  | 0.981673 |
| 6404_20_C finngen_R outcome  | 6404_20_C Simple mc   | 23  | 0.226816 | 0.230368 | 0.335534 |
| 6404_20_C finngen_R outcome  | 6404_20_C Weighted    | 23  | 0.114532 | 0.143358 | 0.432876 |
| 6408_2_IN finngen_R outcome  | 6408_2_IN MR Egger    | 7   | 0.092514 | 0.59318  | 0.882163 |
| 6408_2_IN finngen_R outcome  | 6408_2_IN Weighted    | 7   | 0.563857 | 0.265586 | 0.033748 |
| 6408_2_IN finngen_R outcome  | 6408_2_IN Inverse va  | 7   | 0.660841 | 0.207502 | 0.001449 |
| 6408_2_IN finngen_R outcome  | 6408_2_IN Simple mc   | 7   | 0.439556 | 0.439099 | 0.355454 |
| 6408_2_IN finngen_R outcome  | 6408_2_IN Weighted    | 7   | 0.504367 | 0.321866 | 0.168155 |
| 6415_90_C finngen_R outcome  | 6415_90_C MR Egger    | 45  | -0.14253 | 0.089489 | 0.118544 |
| 6415_90_C finngen_R outcome  | 6415_90_C Weighted    | 45  | -0.02173 | 0.071467 | 0.761115 |
| 6415_90_C finngen_R outcome  | 6415_90_C Inverse va  | 45  | -0.05753 | 0.060177 | 0.339096 |
| 6415_90_C finngen_R outcome  | 6415_90_C Simple mc   | 45  | -0.10635 | 0.176853 | 0.550694 |
| 6415_90_C finngen_R outcome  | 6415_90_C Weighted    | 45  | -0.02536 | 0.061222 | 0.680724 |
| 6416_8_GI finngen_R outcome  | 6416_8_GI MR Egger    | 41  | -0.06394 | 0.099923 | 0.525988 |
| 6416_8_GI finngen_R outcome  | 6416_8_GI Weighted    | 41  | -0.20379 | 0.089376 | 0.022598 |
| 6416_8_GI finngen_R outcome  | 6416_8_GI Inverse va  | 41  | -0.03779 | 0.063901 | 0.554222 |
| 6416_8_GI finngen_R outcome  | 6416_8_GI Simple mc   | 41  | 0.172183 | 0.205829 | 0.407825 |
| 6416_8_GI finngen_R outcome  | 6416_8_GI Weighted    | 41  | -0.16932 | 0.08655  | 0.057434 |
| 6425_87_M finngen_R outcome  | 6425_87_M MR Egger    | 9   | 0.758225 | 0.343522 | 0.063056 |
| 6425_87_M finngen_R outcome  | 6425_87_M Weighted    | 9   | 0.545013 | 0.246777 | 0.027208 |
| 6425_87_M finngen_R outcome  | 6425_87_M Inverse va  | 9   | 0.518519 | 0.191513 | 0.006779 |

|                             |                     |    |          |          |          |
|-----------------------------|---------------------|----|----------|----------|----------|
| 6425_87_Mfinngen_R outcome  | 6425_87_MSimple mc  | 9  | 0.543333 | 0.37789  | 0.18843  |
| 6425_87_Mfinngen_R outcome  | 6425_87_MWeighted   | 9  | 0.699919 | 0.323688 | 0.062562 |
| 6431_68_Ffinngen_R outcome  | 6431_68_FMREgger    | 77 | 0.033684 | 0.059121 | 0.570548 |
| 6431_68_Ffinngen_R outcome  | 6431_68_FWeighted   | 77 | -0.05898 | 0.058617 | 0.314345 |
| 6431_68_Ffinngen_R outcome  | 6431_68_FInverse va | 77 | -0.02025 | 0.037294 | 0.587205 |
| 6431_68_Ffinngen_R outcome  | 6431_68_FSimple mc  | 77 | 0.02005  | 0.107328 | 0.852307 |
| 6431_68_Ffinngen_R outcome  | 6431_68_FWeighted   | 77 | -0.02607 | 0.047736 | 0.586506 |
| 6433_57_Ffinngen_R outcome  | 6433_57_FMREgger    | 12 | 0.150957 | 0.27831  | 0.599418 |
| 6433_57_Ffinngen_R outcome  | 6433_57_FWeighted   | 12 | -0.07083 | 0.171186 | 0.679053 |
| 6433_57_Ffinngen_R outcome  | 6433_57_FInverse va | 12 | -0.07429 | 0.132282 | 0.574378 |
| 6433_57_Ffinngen_R outcome  | 6433_57_FSimple mc  | 12 | -0.03519 | 0.230475 | 0.881401 |
| 6433_57_Ffinngen_R outcome  | 6433_57_FWeighted   | 12 | -0.05893 | 0.17732  | 0.745887 |
| 6434_18_ffinngen_R outcome  | 6434_18_fInverse va | 2  | 0.176229 | 0.583145 | 0.762496 |
| 6448_36_sfinngen_R outcome  | 6448_36_sInverse va | 2  | -0.32521 | 0.380282 | 0.39245  |
| 6451_64_ffinngen_R outcome  | 6451_64_fMREgger    | 62 | 0.159846 | 0.118975 | 0.184161 |
| 6451_64_ffinngen_R outcome  | 6451_64_fWeighted   | 62 | 0.111838 | 0.076864 | 0.145667 |
| 6451_64_ffinngen_R outcome  | 6451_64_fInverse va | 62 | 0.114885 | 0.051908 | 0.02688  |
| 6451_64_ffinngen_R outcome  | 6451_64_fSimple mc  | 62 | 0.1413   | 0.16264  | 0.388366 |
| 6451_64_ffinngen_R outcome  | 6451_64_fWeighted   | 62 | 0.077443 | 0.127742 | 0.546599 |
| 6461_54_ffinngen_R outcome  | 6461_54_fMREgger    | 12 | 0.081431 | 0.269678 | 0.768873 |
| 6461_54_ffinngen_R outcome  | 6461_54_fWeighted   | 12 | 0.189463 | 0.187097 | 0.31123  |
| 6461_54_ffinngen_R outcome  | 6461_54_fInverse va | 12 | 0.171093 | 0.140725 | 0.22406  |
| 6461_54_ffinngen_R outcome  | 6461_54_fSimple mc  | 12 | 0.285683 | 0.266356 | 0.306436 |
| 6461_54_ffinngen_R outcome  | 6461_54_fWeighted   | 12 | 0.255466 | 0.21107  | 0.251515 |
| 6462_12_Tfinngen_R outcome  | 6462_12_TMREgger    | 51 | -0.06583 | 0.098365 | 0.506513 |
| 6462_12_Tfinngen_R outcome  | 6462_12_TWeighted   | 51 | 0.034975 | 0.076281 | 0.646585 |
| 6462_12_Tfinngen_R outcome  | 6462_12_TInverse va | 51 | -0.02475 | 0.056387 | 0.660672 |
| 6462_12_Tfinngen_R outcome  | 6462_12_TSimple mc  | 51 | -0.08137 | 0.148108 | 0.585177 |
| 6462_12_Tfinngen_R outcome  | 6462_12_TWeighted   | 51 | -0.00215 | 0.081799 | 0.979184 |
| 6467_65_Ffinngen_R outcome  | 6467_65_FMREgger    | 15 | 0.196331 | 0.195933 | 0.334614 |
| 6467_65_Ffinngen_R outcome  | 6467_65_FWeighted   | 15 | 0.028899 | 0.155306 | 0.852384 |
| 6467_65_Ffinngen_R outcome  | 6467_65_FInverse va | 15 | 0.045155 | 0.11173  | 0.686105 |
| 6467_65_Ffinngen_R outcome  | 6467_65_FSimple mc  | 15 | -0.09266 | 0.252999 | 0.719653 |
| 6467_65_Ffinngen_R outcome  | 6467_65_FWeighted   | 15 | 0.07096  | 0.146211 | 0.63495  |
| 6470_19_Ffinngen_R outcome  | 6470_19_FMREgger    | 13 | 0.038522 | 0.204747 | 0.854188 |
| 6470_19_Ffinngen_R outcome  | 6470_19_FWeighted   | 13 | -0.07624 | 0.153684 | 0.619839 |
| 6470_19_Ffinngen_R outcome  | 6470_19_FInverse va | 13 | -0.06836 | 0.1213   | 0.573067 |
| 6470_19_Ffinngen_R outcome  | 6470_19_FSimple mc  | 13 | -0.14344 | 0.289758 | 0.629508 |
| 6470_19_Ffinngen_R outcome  | 6470_19_FWeighted   | 13 | -0.037   | 0.178458 | 0.839209 |
| 6471_53_Cfinngen_R outcome  | 6471_53_CMREgger    | 84 | -0.00211 | 0.036713 | 0.954302 |
| 6471_53_Cfinngen_R outcome  | 6471_53_CWeighted   | 84 | -0.0442  | 0.03328  | 0.184184 |
| 6471_53_Cfinngen_R outcome  | 6471_53_CInverse va | 84 | -0.02226 | 0.023369 | 0.340747 |
| 6471_53_Cfinngen_R outcome  | 6471_53_CSimple mc  | 84 | -0.0222  | 0.051012 | 0.664603 |
| 6471_53_Cfinngen_R outcome  | 6471_53_CWeighted   | 84 | -0.05309 | 0.035851 | 0.142401 |
| 6472_40_Ffinngen_R outcome  | 6472_40_FMREgger    | 17 | -0.01036 | 0.154948 | 0.947579 |
| 6472_40_Ffinngen_R outcome  | 6472_40_FWeighted   | 17 | 0.062424 | 0.135077 | 0.643984 |
| 6472_40_Ffinngen_R outcome  | 6472_40_FInverse va | 17 | 0.142012 | 0.102216 | 0.164731 |
| 6472_40_Ffinngen_R outcome  | 6472_40_FSimple mc  | 17 | 0.161587 | 0.223374 | 0.479882 |
| 6472_40_Ffinngen_R outcome  | 6472_40_FWeighted   | 17 | 0.08917  | 0.136443 | 0.522695 |
| 6485_59_Ifinngen_R outcome  | 6485_59_IMREgger    | 51 | -0.12445 | 0.071474 | 0.087932 |
| 6485_59_Ifinngen_R outcome  | 6485_59_IWeighted   | 51 | -0.03987 | 0.073801 | 0.58906  |
| 6485_59_Ifinngen_R outcome  | 6485_59_IInverse va | 51 | 0.027236 | 0.051221 | 0.594912 |
| 6485_59_Ifinngen_R outcome  | 6485_59_ISimple mc  | 51 | 0.100042 | 0.152797 | 0.515639 |
| 6485_59_Ifinngen_R outcome  | 6485_59_IWeighted   | 51 | -0.0609  | 0.066647 | 0.365196 |
| 6493_9_Cf finngen_R outcome | 6493_9_CfInverse va | 2  | -0.01912 | 0.403905 | 0.962244 |
| 6496_60_Lfinngen_R outcome  | 6496_60_LMREgger    | 74 | -0.01249 | 0.071157 | 0.861125 |
| 6496_60_Lfinngen_R outcome  | 6496_60_LWeighted   | 74 | 0.026804 | 0.059062 | 0.649948 |
| 6496_60_Lfinngen_R outcome  | 6496_60_LInverse va | 74 | 0.047697 | 0.037285 | 0.200813 |

|                             |                      |     |          |          |          |
|-----------------------------|----------------------|-----|----------|----------|----------|
| 6496_60_└finngen_R outcome  | 6496_60_└Simple mc   | 74  | 0.015812 | 0.099898 | 0.874676 |
| 6496_60_└finngen_R outcome  | 6496_60_└Weighted    | 74  | 0.015812 | 0.05165  | 0.760378 |
| 6520_87_└finngen_R outcome  | 6520_87_└MR Egger    | 26  | -0.36757 | 0.290826 | 0.21841  |
| 6520_87_└finngen_R outcome  | 6520_87_└Weighted    | 26  | -0.06252 | 0.13471  | 0.642569 |
| 6520_87_└finngen_R outcome  | 6520_87_└Inverse va  | 26  | -0.18351 | 0.113299 | 0.105297 |
| 6520_87_└finngen_R outcome  | 6520_87_└Simple mc   | 26  | -0.42079 | 0.237903 | 0.089138 |
| 6520_87_└finngen_R outcome  | 6520_87_└Weighted    | 26  | -0.16313 | 0.142079 | 0.261776 |
| 6521_35_└finngen_R outcome  | 6521_35_└MR Egger    | 6   | -0.34425 | 1.253208 | 0.797155 |
| 6521_35_└finngen_R outcome  | 6521_35_└Weighted    | 6   | 0.169009 | 0.398887 | 0.671784 |
| 6521_35_└finngen_R outcome  | 6521_35_└Inverse va  | 6   | 0.22405  | 0.312076 | 0.472797 |
| 6521_35_└finngen_R outcome  | 6521_35_└Simple mc   | 6   | -0.02717 | 0.589162 | 0.965    |
| 6521_35_└finngen_R outcome  | 6521_35_└Weighted    | 6   | 0.105872 | 0.588123 | 0.864207 |
| 6544_33_└finngen_R outcome  | 6544_33_└MR Egger    | 86  | 0.060068 | 0.061951 | 0.335022 |
| 6544_33_└finngen_R outcome  | 6544_33_└Weighted    | 86  | 0.06439  | 0.061632 | 0.296141 |
| 6544_33_└finngen_R outcome  | 6544_33_└Inverse va  | 86  | 0.047205 | 0.039681 | 0.234208 |
| 6544_33_└finngen_R outcome  | 6544_33_└Simple mc   | 86  | 0.217563 | 0.124361 | 0.083824 |
| 6544_33_└finngen_R outcome  | 6544_33_└Weighted    | 86  | 0.068147 | 0.064422 | 0.293138 |
| 6550_4_IC finngen_R outcome | 6550_4_IC MR Egger   | 4   | -0.75047 | 0.893602 | 0.4894   |
| 6550_4_IC finngen_R outcome | 6550_4_IC Weighted   | 4   | -0.11918 | 0.269595 | 0.658448 |
| 6550_4_IC finngen_R outcome | 6550_4_IC Inverse va | 4   | -0.12787 | 0.239636 | 0.593625 |
| 6550_4_IC finngen_R outcome | 6550_4_IC Simple mc  | 4   | 0.071907 | 0.469611 | 0.888022 |
| 6550_4_IC finngen_R outcome | 6550_4_IC Weighted   | 4   | -0.37493 | 0.307138 | 0.309382 |
| 6551_94_└finngen_R outcome  | 6551_94_└MR Egger    | 106 | -0.05745 | 0.059404 | 0.335703 |
| 6551_94_└finngen_R outcome  | 6551_94_└Weighted    | 106 | -0.07768 | 0.055982 | 0.165259 |
| 6551_94_└finngen_R outcome  | 6551_94_└Inverse va  | 106 | -0.10401 | 0.036649 | 0.00454  |
| 6551_94_└finngen_R outcome  | 6551_94_└Simple mc   | 106 | -0.10917 | 0.111727 | 0.330774 |
| 6551_94_└finngen_R outcome  | 6551_94_└Weighted    | 106 | -0.06344 | 0.055364 | 0.254466 |
| 6556_5_EM finngen_R outcome | 6556_5_EM MR Egger   | 124 | 0.02862  | 0.037239 | 0.443639 |
| 6556_5_EM finngen_R outcome | 6556_5_EM Weighted   | 124 | 0.003801 | 0.03836  | 0.921076 |
| 6556_5_EM finngen_R outcome | 6556_5_EM Inverse va | 124 | -0.00768 | 0.025457 | 0.762818 |
| 6556_5_EM finngen_R outcome | 6556_5_EM Simple mc  | 124 | -0.06342 | 0.076366 | 0.407865 |
| 6556_5_EM finngen_R outcome | 6556_5_EM Weighted   | 124 | -0.00909 | 0.034417 | 0.792123 |
| 6558_5_C(finngen_R outcome  | 6558_5_C Inverse va  | 2   | 0.822073 | 0.636428 | 0.196461 |
| 6576_1_Af finngen_R outcome | 6576_1_Af MR Egger   | 133 | 0.001558 | 0.039352 | 0.968477 |
| 6576_1_Af finngen_R outcome | 6576_1_Af Weighted   | 133 | -0.01433 | 0.039955 | 0.719871 |
| 6576_1_Af finngen_R outcome | 6576_1_Af Inverse va | 133 | -0.02419 | 0.022984 | 0.292546 |
| 6576_1_Af finngen_R outcome | 6576_1_Af Simple mc  | 133 | -0.01311 | 0.072365 | 0.856494 |
| 6576_1_Af finngen_R outcome | 6576_1_Af Weighted   | 133 | -0.02962 | 0.033828 | 0.382837 |
| 6580_29_F finngen_R outcome | 6580_29_F MR Egger   | 24  | -0.30759 | 0.240173 | 0.213636 |
| 6580_29_F finngen_R outcome | 6580_29_F Weighted   | 24  | 0.016158 | 0.162066 | 0.920582 |
| 6580_29_F finngen_R outcome | 6580_29_F Inverse va | 24  | -0.1004  | 0.116103 | 0.387176 |
| 6580_29_F finngen_R outcome | 6580_29_F Simple mc  | 24  | -0.12225 | 0.329364 | 0.713914 |
| 6580_29_F finngen_R outcome | 6580_29_F Weighted   | 24  | 0.109692 | 0.271003 | 0.689391 |
| 6605_17_└finngen_R outcome  | 6605_17_└MR Egger    | 20  | 0.168187 | 0.183148 | 0.370597 |
| 6605_17_└finngen_R outcome  | 6605_17_└Weighted    | 20  | -0.07175 | 0.129706 | 0.580155 |
| 6605_17_└finngen_R outcome  | 6605_17_└Inverse va  | 20  | -0.03479 | 0.094024 | 0.711394 |
| 6605_17_└finngen_R outcome  | 6605_17_└Simple mc   | 20  | 0.140204 | 0.198954 | 0.489543 |
| 6605_17_└finngen_R outcome  | 6605_17_└Weighted    | 20  | -0.07985 | 0.164047 | 0.632013 |
| 6609_22_C finngen_R outcome | 6609_22_C Inverse va | 2   | 0.092999 | 0.358623 | 0.795386 |
| 6617_12_F finngen_R outcome | 6617_12_F MR Egger   | 3   | 0.423701 | 0.626991 | 0.621671 |
| 6617_12_F finngen_R outcome | 6617_12_F Weighted   | 3   | -0.13633 | 0.293836 | 0.642683 |
| 6617_12_F finngen_R outcome | 6617_12_F Inverse va | 3   | -0.15102 | 0.276836 | 0.585384 |
| 6617_12_F finngen_R outcome | 6617_12_F Simple mc  | 3   | 0.028486 | 0.445599 | 0.954843 |
| 6617_12_F finngen_R outcome | 6617_12_F Weighted   | 3   | -0.10288 | 0.31383  | 0.774187 |
| 6620_82_L finngen_R outcome | 6620_82_L MR Egger   | 3   | -2.2055  | 2.663519 | 0.559711 |
| 6620_82_L finngen_R outcome | 6620_82_L Weighted   | 3   | -0.19049 | 0.316382 | 0.547112 |
| 6620_82_L finngen_R outcome | 6620_82_L Inverse va | 3   | -0.2824  | 0.293    | 0.335132 |
| 6620_82_L finngen_R outcome | 6620_82_L Simple mc  | 3   | -0.18906 | 0.388866 | 0.674899 |

|                              |                       |     |          |          |          |
|------------------------------|-----------------------|-----|----------|----------|----------|
| 6620_82_L finngen_R outcome  | 6620_82_L Weighted    | 3   | -0.19067 | 0.371059 | 0.658491 |
| 6626_81_C finngen_R outcome  | 6626_81_C MR Egger    | 8   | 0.088604 | 0.443491 | 0.848246 |
| 6626_81_C finngen_R outcome  | 6626_81_C Weighted    | 8   | -0.42892 | 0.190002 | 0.023981 |
| 6626_81_C finngen_R outcome  | 6626_81_C Inverse va  | 8   | -0.28862 | 0.138073 | 0.036588 |
| 6626_81_C finngen_R outcome  | 6626_81_C Simple mc   | 8   | -0.43696 | 0.299539 | 0.187993 |
| 6626_81_C finngen_R outcome  | 6626_81_C Weighted    | 8   | -0.50765 | 0.245078 | 0.07706  |
| 6627_25_F finngen_R outcome  | 6627_25_F MR Egger    | 7   | -1.33368 | 0.498915 | 0.044181 |
| 6627_25_F finngen_R outcome  | 6627_25_F Weighted    | 7   | -0.36217 | 0.207045 | 0.080248 |
| 6627_25_F finngen_R outcome  | 6627_25_F Inverse va  | 7   | -0.3264  | 0.191743 | 0.088707 |
| 6627_25_F finngen_R outcome  | 6627_25_F Simple mc   | 7   | -0.24125 | 0.331379 | 0.494028 |
| 6627_25_F finngen_R outcome  | 6627_25_F Weighted    | 7   | -0.3564  | 0.209663 | 0.140061 |
| 6629_3_Df finngen_R outcome  | 6629_3_Df MR Egger    | 57  | -0.01649 | 0.102714 | 0.873036 |
| 6629_3_Df finngen_R outcome  | 6629_3_Df Weighted    | 57  | 0.055951 | 0.0814   | 0.491858 |
| 6629_3_Df finngen_R outcome  | 6629_3_Df Inverse va  | 57  | 0.091488 | 0.051521 | 0.075774 |
| 6629_3_Df finngen_R outcome  | 6629_3_Df Simple mc   | 57  | 0.226392 | 0.14924  | 0.134899 |
| 6629_3_Df finngen_R outcome  | 6629_3_Df Weighted    | 57  | 0.051601 | 0.080464 | 0.523948 |
| 6649_51_↑ finngen_R outcome  | 6649_51_↑ MR Egger    | 41  | -0.09313 | 0.097248 | 0.344128 |
| 6649_51_↑ finngen_R outcome  | 6649_51_↑ Weighted    | 41  | -0.0738  | 0.083409 | 0.376298 |
| 6649_51_↑ finngen_R outcome  | 6649_51_↑ Inverse va  | 41  | -0.05012 | 0.056393 | 0.374136 |
| 6649_51_↑ finngen_R outcome  | 6649_51_↑ Simple mc   | 41  | -0.13138 | 0.137278 | 0.344309 |
| 6649_51_↑ finngen_R outcome  | 6649_51_↑ Weighted    | 41  | -0.09752 | 0.074829 | 0.199958 |
| 6706_18_∕ finngen_R outcome  | 6706_18_∕ Inverse va  | 2   | 0.762711 | 0.581447 | 0.189606 |
| 6715_63_∕ finngen_R outcome  | 6715_63_∕ MR Egger    | 19  | 0.038049 | 0.201291 | 0.852313 |
| 6715_63_∕ finngen_R outcome  | 6715_63_∕ Weighted    | 19  | 0.133413 | 0.141171 | 0.344637 |
| 6715_63_∕ finngen_R outcome  | 6715_63_∕ Inverse va  | 19  | 0.140187 | 0.1031   | 0.173919 |
| 6715_63_∕ finngen_R outcome  | 6715_63_∕ Simple mc   | 19  | 0.020208 | 0.209696 | 0.924292 |
| 6715_63_∕ finngen_R outcome  | 6715_63_∕ Weighted    | 19  | 0.105996 | 0.162589 | 0.522685 |
| 6984_6_IG finngen_R outcome  | 6984_6_IG MR Egger    | 4   | -0.14916 | 0.409993 | 0.750854 |
| 6984_6_IG finngen_R outcome  | 6984_6_IG Weighted    | 4   | -0.22892 | 0.215283 | 0.287632 |
| 6984_6_IG finngen_R outcome  | 6984_6_IG Inverse va  | 4   | -0.24911 | 0.204836 | 0.223921 |
| 6984_6_IG finngen_R outcome  | 6984_6_IG Simple mc   | 4   | -0.41262 | 0.339364 | 0.310983 |
| 6984_6_IG finngen_R outcome  | 6984_6_IG Weighted    | 4   | -0.19057 | 0.23591  | 0.478317 |
| 7009_8_Cf finngen_R outcome  | 7009_8_Cf MR Egger    | 5   | -1.04324 | 0.499741 | 0.128075 |
| 7009_8_Cf finngen_R outcome  | 7009_8_Cf Weighted    | 5   | -0.33479 | 0.31028  | 0.280594 |
| 7009_8_Cf finngen_R outcome  | 7009_8_Cf Inverse va  | 5   | -0.28462 | 0.269536 | 0.290991 |
| 7009_8_Cf finngen_R outcome  | 7009_8_Cf Simple mc   | 5   | 0.183399 | 0.478459 | 0.72099  |
| 7009_8_Cf finngen_R outcome  | 7009_8_Cf Weighted    | 5   | -0.4791  | 0.47339  | 0.368756 |
| 7015_8_LII finngen_R outcome | 7015_8_LII MR Egger   | 205 | 0.013727 | 0.028039 | 0.624972 |
| 7015_8_LII finngen_R outcome | 7015_8_LII Weighted   | 205 | 0.019042 | 0.030382 | 0.530814 |
| 7015_8_LII finngen_R outcome | 7015_8_LII Inverse va | 205 | 0.003399 | 0.017791 | 0.848489 |
| 7015_8_LII finngen_R outcome | 7015_8_LII Simple mc  | 205 | -0.02802 | 0.055825 | 0.616269 |
| 7015_8_LII finngen_R outcome | 7015_8_LII Weighted   | 205 | 0.029665 | 0.026116 | 0.257335 |
| 7019_13_§ finngen_R outcome  | 7019_13_§ Wald ratio  | 1   | 0.127514 | 0.517206 | 0.805261 |
| 7049_2_AI finngen_R outcome  | 7049_2_AI MR Egger    | 110 | 0.084821 | 0.050891 | 0.098467 |
| 7049_2_AI finngen_R outcome  | 7049_2_AI Weighted    | 110 | 0.006378 | 0.05453  | 0.906891 |
| 7049_2_AI finngen_R outcome  | 7049_2_AI Inverse va  | 110 | 0.024434 | 0.032425 | 0.451121 |
| 7049_2_AI finngen_R outcome  | 7049_2_AI Simple mc   | 110 | -0.11328 | 0.103094 | 0.274283 |
| 7049_2_AI finngen_R outcome  | 7049_2_AI Weighted    | 110 | 0.045282 | 0.058401 | 0.439803 |
| 7050_5_NI finngen_R outcome  | 7050_5_NI MR Egger    | 9   | 0.521099 | 0.619732 | 0.428219 |
| 7050_5_NI finngen_R outcome  | 7050_5_NI Weighted    | 9   | 0.043178 | 0.247128 | 0.861301 |
| 7050_5_NI finngen_R outcome  | 7050_5_NI Inverse va  | 9   | 0.040722 | 0.19158  | 0.831672 |
| 7050_5_NI finngen_R outcome  | 7050_5_NI Simple mc   | 9   | 0.295957 | 0.400916 | 0.481483 |
| 7050_5_NI finngen_R outcome  | 7050_5_NI Weighted    | 9   | 0.06698  | 0.265961 | 0.807514 |
| 7059_14_L finngen_R outcome  | 7059_14_L MR Egger    | 239 | -0.03937 | 0.030611 | 0.199674 |
| 7059_14_L finngen_R outcome  | 7059_14_L Weighted    | 239 | -0.03643 | 0.033271 | 0.273561 |
| 7059_14_L finngen_R outcome  | 7059_14_L Inverse va  | 239 | -0.01565 | 0.018925 | 0.408182 |
| 7059_14_L finngen_R outcome  | 7059_14_L Simple mc   | 239 | -0.06259 | 0.069285 | 0.367217 |
| 7059_14_L finngen_R outcome  | 7059_14_L Weighted    | 239 | -0.03836 | 0.036736 | 0.297463 |

|                              |                       |    |          |          |          |
|------------------------------|-----------------------|----|----------|----------|----------|
| 7083_74_M finngen_R outcome  | 7083_74_M MR Egger    | 27 | -0.28129 | 0.151441 | 0.075068 |
| 7083_74_M finngen_R outcome  | 7083_74_M Weighted    | 27 | -0.27464 | 0.107027 | 0.010285 |
| 7083_74_M finngen_R outcome  | 7083_74_M Inverse va  | 27 | -0.27514 | 0.074956 | 0.000242 |
| 7083_74_M finngen_R outcome  | 7083_74_M Simple mc   | 27 | -0.50049 | 0.191438 | 0.014675 |
| 7083_74_M finngen_R outcome  | 7083_74_M Weighted    | 27 | -0.30875 | 0.112603 | 0.010905 |
| 7110_2_DI finngen_R outcome  | 7110_2_DI MR Egger    | 4  | 2.10555  | 1.745012 | 0.350938 |
| 7110_2_DI finngen_R outcome  | 7110_2_DI Weighted    | 4  | -0.12591 | 0.457729 | 0.783261 |
| 7110_2_DI finngen_R outcome  | 7110_2_DI Inverse va  | 4  | 0.074689 | 0.391766 | 0.848802 |
| 7110_2_DI finngen_R outcome  | 7110_2_DI Simple mc   | 4  | -0.15011 | 0.552546 | 0.803503 |
| 7110_2_DI finngen_R outcome  | 7110_2_DI Weighted    | 4  | -0.15011 | 0.481306 | 0.775555 |
| 7128_9_VA finngen_R outcome  | 7128_9_VA MR Egger    | 31 | -0.13738 | 0.15123  | 0.37113  |
| 7128_9_VA finngen_R outcome  | 7128_9_VA Weighted    | 31 | -0.0896  | 0.124955 | 0.473357 |
| 7128_9_VA finngen_R outcome  | 7128_9_VA Inverse va  | 31 | -0.14812 | 0.08381  | 0.077175 |
| 7128_9_VA finngen_R outcome  | 7128_9_VA Simple mc   | 31 | -0.05369 | 0.22143  | 0.810061 |
| 7128_9_VA finngen_R outcome  | 7128_9_VA Weighted    | 31 | -0.04056 | 0.170102 | 0.81317  |
| 7140_1_CI finngen_R outcome  | 7140_1_CI MR Egger    | 6  | -0.48555 | 0.600322 | 0.463983 |
| 7140_1_CI finngen_R outcome  | 7140_1_CI Weighted    | 6  | -0.00999 | 0.383509 | 0.979214 |
| 7140_1_CI finngen_R outcome  | 7140_1_CI Inverse va  | 6  | -0.04828 | 0.300622 | 0.872419 |
| 7140_1_CI finngen_R outcome  | 7140_1_CI Simple mc   | 6  | 0.159425 | 0.526985 | 0.774435 |
| 7140_1_CI finngen_R outcome  | 7140_1_CI Weighted    | 6  | 0.197781 | 0.468714 | 0.690579 |
| 7145_1_ITI finngen_R outcome | 7145_1_ITI MR Egger   | 85 | -0.02306 | 0.055815 | 0.680615 |
| 7145_1_ITI finngen_R outcome | 7145_1_ITI Weighted   | 85 | 0.022452 | 0.049866 | 0.652536 |
| 7145_1_ITI finngen_R outcome | 7145_1_ITI Inverse va | 85 | 0.014183 | 0.033684 | 0.673724 |
| 7145_1_ITI finngen_R outcome | 7145_1_ITI Simple mc  | 85 | -0.01456 | 0.08514  | 0.864594 |
| 7145_1_ITI finngen_R outcome | 7145_1_ITI Weighted   | 85 | 0.008333 | 0.050247 | 0.868681 |
| 7161_25_H finngen_R outcome  | 7161_25_H MR Egger    | 97 | -0.01655 | 0.055289 | 0.765334 |
| 7161_25_H finngen_R outcome  | 7161_25_H Weighted    | 97 | -0.04631 | 0.050956 | 0.363451 |
| 7161_25_H finngen_R outcome  | 7161_25_H Inverse va  | 97 | -0.03521 | 0.033342 | 0.290995 |
| 7161_25_H finngen_R outcome  | 7161_25_H Simple mc   | 97 | -0.03616 | 0.086905 | 0.678244 |
| 7161_25_H finngen_R outcome  | 7161_25_H Weighted    | 97 | -0.05055 | 0.043366 | 0.246611 |
| 7185_29_C finngen_R outcome  | 7185_29_C MR Egger    | 4  | 0.830149 | 1.229675 | 0.569203 |
| 7185_29_C finngen_R outcome  | 7185_29_C Weighted    | 4  | -0.16443 | 0.323734 | 0.611516 |
| 7185_29_C finngen_R outcome  | 7185_29_C Inverse va  | 4  | -0.18779 | 0.277837 | 0.499114 |
| 7185_29_C finngen_R outcome  | 7185_29_C Simple mc   | 4  | -0.22464 | 0.442955 | 0.646993 |
| 7185_29_C finngen_R outcome  | 7185_29_C Weighted    | 4  | -0.15813 | 0.341672 | 0.675012 |
| 7206_20_F finngen_R outcome  | 7206_20_F MR Egger    | 3  | -0.93501 | 0.797495 | 0.449576 |
| 7206_20_F finngen_R outcome  | 7206_20_F Weighted    | 3  | -0.5246  | 0.297458 | 0.077799 |
| 7206_20_F finngen_R outcome  | 7206_20_F Inverse va  | 3  | -0.52273 | 0.282567 | 0.064326 |
| 7206_20_F finngen_R outcome  | 7206_20_F Simple mc   | 3  | -0.35914 | 0.395487 | 0.459678 |
| 7206_20_F finngen_R outcome  | 7206_20_F Weighted    | 3  | -0.54307 | 0.374861 | 0.284418 |
| 7211_2_RT finngen_R outcome  | 7211_2_RT MR Egger    | 25 | -0.17099 | 0.164862 | 0.310444 |
| 7211_2_RT finngen_R outcome  | 7211_2_RT Weighted    | 25 | 0.085321 | 0.14066  | 0.544132 |
| 7211_2_RT finngen_R outcome  | 7211_2_RT Inverse va  | 25 | 0.131743 | 0.08968  | 0.14182  |
| 7211_2_RT finngen_R outcome  | 7211_2_RT Simple mc   | 25 | -0.05139 | 0.259844 | 0.844891 |
| 7211_2_RT finngen_R outcome  | 7211_2_RT Weighted    | 25 | -0.00337 | 0.152065 | 0.982504 |
| 7218_87_F finngen_R outcome  | 7218_87_F MR Egger    | 38 | -0.01903 | 0.159779 | 0.905859 |
| 7218_87_F finngen_R outcome  | 7218_87_F Weighted    | 38 | -0.03562 | 0.09668  | 0.71254  |
| 7218_87_F finngen_R outcome  | 7218_87_F Inverse va  | 38 | 0.009322 | 0.067655 | 0.890405 |
| 7218_87_F finngen_R outcome  | 7218_87_F Simple mc   | 38 | 0.058986 | 0.194109 | 0.76292  |
| 7218_87_F finngen_R outcome  | 7218_87_F Weighted    | 38 | 0.025285 | 0.113975 | 0.825653 |
| 7227_75_C finngen_R outcome  | 7227_75_C MR Egger    | 22 | 0.058304 | 0.116526 | 0.62229  |
| 7227_75_C finngen_R outcome  | 7227_75_C Weighted    | 22 | 0.077363 | 0.100692 | 0.442301 |
| 7227_75_C finngen_R outcome  | 7227_75_C Inverse va  | 22 | 0.08591  | 0.072546 | 0.236323 |
| 7227_75_C finngen_R outcome  | 7227_75_C Simple mc   | 22 | 0.157883 | 0.160665 | 0.336949 |
| 7227_75_C finngen_R outcome  | 7227_75_C Weighted    | 22 | 0.092168 | 0.093774 | 0.336858 |
| 7266_4_SE finngen_R outcome  | 7266_4_SE MR Egger    | 24 | 0.205257 | 0.208882 | 0.336466 |
| 7266_4_SE finngen_R outcome  | 7266_4_SE Weighted    | 24 | -0.09383 | 0.124926 | 0.45262  |
| 7266_4_SE finngen_R outcome  | 7266_4_SE Inverse va  | 24 | -0.12286 | 0.089578 | 0.170214 |



|                             |                      |    |          |          |          |
|-----------------------------|----------------------|----|----------|----------|----------|
| 7266_4_SE finngen_R outcome | 7266_4_SE Simple mc  | 24 | -0.02338 | 0.194172 | 0.90519  |
| 7266_4_SE finngen_R outcome | 7266_4_SE Weighted   | 24 | -0.0072  | 0.156895 | 0.963793 |
| 7655_11_I finngen_R outcome | 7655_11_I MR Egger   | 20 | 0.105295 | 0.172737 | 0.549765 |
| 7655_11_I finngen_R outcome | 7655_11_I Weighted   | 20 | 0.060185 | 0.121351 | 0.61992  |
| 7655_11_I finngen_R outcome | 7655_11_I Inverse va | 20 | 0.070483 | 0.088294 | 0.424712 |
| 7655_11_I finngen_R outcome | 7655_11_I Simple mc  | 20 | -0.18214 | 0.205038 | 0.38547  |
| 7655_11_I finngen_R outcome | 7655_11_I Weighted   | 20 | 0.017359 | 0.130375 | 0.895476 |
| 7779_86_C finngen_R outcome | 7779_86_C MR Egger   | 47 | 0.088769 | 0.157023 | 0.57466  |
| 7779_86_C finngen_R outcome | 7779_86_C Weighted   | 47 | -0.01909 | 0.098227 | 0.845907 |
| 7779_86_C finngen_R outcome | 7779_86_C Inverse va | 47 | -0.11598 | 0.066719 | 0.082144 |
| 7779_86_C finngen_R outcome | 7779_86_C Simple mc  | 47 | 0.079037 | 0.162536 | 0.629081 |
| 7779_86_C finngen_R outcome | 7779_86_C Weighted   | 47 | 0.031187 | 0.115161 | 0.78775  |
| 7784_1_KI finngen_R outcome | 7784_1_KI MR Egger   | 28 | -0.03968 | 0.118364 | 0.740145 |
| 7784_1_KI finngen_R outcome | 7784_1_KI Weighted   | 28 | -0.03704 | 0.114981 | 0.747333 |
| 7784_1_KI finngen_R outcome | 7784_1_KI Inverse va | 28 | -0.01843 | 0.076245 | 0.808991 |
| 7784_1_KI finngen_R outcome | 7784_1_KI Simple mc  | 28 | 0.017137 | 0.185914 | 0.927237 |
| 7784_1_KI finngen_R outcome | 7784_1_KI Weighted   | 28 | -0.02512 | 0.103852 | 0.810689 |
| 7787_25_L finngen_R outcome | 7787_25_L MR Egger   | 30 | 0.038953 | 0.115877 | 0.73926  |
| 7787_25_L finngen_R outcome | 7787_25_L Weighted   | 30 | 0.001879 | 0.091768 | 0.983664 |
| 7787_25_L finngen_R outcome | 7787_25_L Inverse va | 30 | -0.01665 | 0.067329 | 0.80466  |
| 7787_25_L finngen_R outcome | 7787_25_L Simple mc  | 30 | 0.174982 | 0.169109 | 0.309347 |
| 7787_25_L finngen_R outcome | 7787_25_L Weighted   | 30 | 0.04462  | 0.088602 | 0.61835  |
| 7810_20_C finngen_R outcome | 7810_20_C MR Egger   | 7  | -0.38819 | 0.247487 | 0.177545 |
| 7810_20_C finngen_R outcome | 7810_20_C Weighted   | 7  | 0.038811 | 0.152263 | 0.798802 |
| 7810_20_C finngen_R outcome | 7810_20_C Inverse va | 7  | 0.299834 | 0.17917  | 0.094237 |
| 7810_20_C finngen_R outcome | 7810_20_C Simple mc  | 7  | 0.801106 | 0.339611 | 0.056369 |
| 7810_20_C finngen_R outcome | 7810_20_C Weighted   | 7  | 0.073943 | 0.158557 | 0.657417 |
| 7841_84_E finngen_R outcome | 7841_84_E MR Egger   | 26 | 0.08978  | 0.170164 | 0.602616 |
| 7841_84_E finngen_R outcome | 7841_84_E Weighted   | 26 | 0.332884 | 0.138202 | 0.01601  |
| 7841_84_E finngen_R outcome | 7841_84_E Inverse va | 26 | 0.210599 | 0.093749 | 0.024678 |
| 7841_84_E finngen_R outcome | 7841_84_E Simple mc  | 26 | 0.323701 | 0.239637 | 0.18886  |
| 7841_84_E finngen_R outcome | 7841_84_E Weighted   | 26 | 0.291895 | 0.149609 | 0.062344 |
| 7849_3_QI finngen_R outcome | 7849_3_QI MR Egger   | 32 | -0.10621 | 0.140128 | 0.454408 |
| 7849_3_QI finngen_R outcome | 7849_3_QI Weighted   | 32 | -0.0888  | 0.103041 | 0.388806 |
| 7849_3_QI finngen_R outcome | 7849_3_QI Inverse va | 32 | -0.0434  | 0.07147  | 0.543677 |
| 7849_3_QI finngen_R outcome | 7849_3_QI Simple mc  | 32 | -0.10046 | 0.159669 | 0.533854 |
| 7849_3_QI finngen_R outcome | 7849_3_QI Weighted   | 32 | -0.10965 | 0.103806 | 0.298994 |
| 7861_9_RC finngen_R outcome | 7861_9_RC MR Egger   | 20 | -0.07907 | 0.437191 | 0.858491 |
| 7861_9_RC finngen_R outcome | 7861_9_RC Weighted   | 20 | -0.35933 | 0.16655  | 0.030969 |
| 7861_9_RC finngen_R outcome | 7861_9_RC Inverse va | 20 | -0.2585  | 0.145121 | 0.074868 |
| 7861_9_RC finngen_R outcome | 7861_9_RC Simple mc  | 20 | 0.267131 | 0.368586 | 0.477439 |
| 7861_9_RC finngen_R outcome | 7861_9_RC Weighted   | 20 | -0.25321 | 0.212603 | 0.248325 |
| 7875_86_F finngen_R outcome | 7875_86_F MR Egger   | 11 | 0.379915 | 0.430401 | 0.40036  |
| 7875_86_F finngen_R outcome | 7875_86_F Weighted   | 11 | 0.557578 | 0.233442 | 0.016917 |
| 7875_86_F finngen_R outcome | 7875_86_F Inverse va | 11 | 0.20962  | 0.19113  | 0.272755 |
| 7875_86_F finngen_R outcome | 7875_86_F Simple mc  | 11 | 0.458102 | 0.448863 | 0.331508 |
| 7875_86_F finngen_R outcome | 7875_86_F Weighted   | 11 | 0.561157 | 0.275621 | 0.069111 |
| 7891_45_L finngen_R outcome | 7891_45_L MR Egger   | 23 | -0.31045 | 0.175868 | 0.092066 |
| 7891_45_L finngen_R outcome | 7891_45_L Weighted   | 23 | -0.18651 | 0.123688 | 0.131583 |
| 7891_45_L finngen_R outcome | 7891_45_L Inverse va | 23 | 0.015408 | 0.088241 | 0.861381 |
| 7891_45_L finngen_R outcome | 7891_45_L Simple mc  | 23 | 0.170304 | 0.271015 | 0.536215 |
| 7891_45_L finngen_R outcome | 7891_45_L Weighted   | 23 | -0.19113 | 0.117272 | 0.117374 |
| 7905_30_I finngen_R outcome | 7905_30_I MR Egger   | 77 | -0.00087 | 0.050905 | 0.986457 |
| 7905_30_I finngen_R outcome | 7905_30_I Weighted   | 77 | 0.007426 | 0.041752 | 0.858835 |
| 7905_30_I finngen_R outcome | 7905_30_I Inverse va | 77 | -0.00571 | 0.027437 | 0.835166 |
| 7905_30_I finngen_R outcome | 7905_30_I Simple mc  | 77 | -0.03813 | 0.070011 | 0.587583 |
| 7905_30_I finngen_R outcome | 7905_30_I Weighted   | 77 | 0.021954 | 0.045058 | 0.627492 |
| 7916_10_S finngen_R outcome | 7916_10_S MR Egger   | 55 | -0.059   | 0.043431 | 0.180076 |

|                            |                      |    |          |          |          |
|----------------------------|----------------------|----|----------|----------|----------|
| 7916_10_§finngen_R outcome | 7916_10_§Weighted    | 55 | -0.07182 | 0.044596 | 0.107316 |
| 7916_10_§finngen_R outcome | 7916_10_§Inverse va  | 55 | -0.04107 | 0.0331   | 0.214733 |
| 7916_10_§finngen_R outcome | 7916_10_§Simple mc   | 55 | -0.04447 | 0.087882 | 0.614903 |
| 7916_10_§finngen_R outcome | 7916_10_§Weighted    | 55 | -0.07723 | 0.039807 | 0.057605 |
| 7918_114_finngen_R outcome | 7918_114_MR Egger    | 70 | 0.004621 | 0.071599 | 0.948727 |
| 7918_114_finngen_R outcome | 7918_114_Weighted    | 70 | 0.026882 | 0.054121 | 0.619391 |
| 7918_114_finngen_R outcome | 7918_114_Inverse va  | 70 | 0.033708 | 0.035874 | 0.347416 |
| 7918_114_finngen_R outcome | 7918_114_Simple mc   | 70 | 0.075266 | 0.096554 | 0.438336 |
| 7918_114_finngen_R outcome | 7918_114_Weighted    | 70 | 0.035397 | 0.074115 | 0.634449 |
| 7921_65_Ffinngen_R outcome | 7921_65_FMR Egger    | 27 | 0.076362 | 0.235725 | 0.748672 |
| 7921_65_Ffinngen_R outcome | 7921_65_FWeighted    | 27 | -0.0495  | 0.141097 | 0.725711 |
| 7921_65_Ffinngen_R outcome | 7921_65_FInverse va  | 27 | 0.111125 | 0.093338 | 0.233823 |
| 7921_65_Ffinngen_R outcome | 7921_65_FSimple mc   | 27 | 0.373588 | 0.286255 | 0.203295 |
| 7921_65_Ffinngen_R outcome | 7921_65_FWeighted    | 27 | -0.06109 | 0.192576 | 0.753598 |
| 7926_13_§finngen_R outcome | 7926_13_§MR Egger    | 43 | 0.138895 | 0.159011 | 0.387484 |
| 7926_13_§finngen_R outcome | 7926_13_§Weighted    | 43 | 0.191225 | 0.109778 | 0.081522 |
| 7926_13_§finngen_R outcome | 7926_13_§Inverse va  | 43 | 0.211322 | 0.073173 | 0.003877 |
| 7926_13_§finngen_R outcome | 7926_13_§Simple mc   | 43 | 0.261772 | 0.207412 | 0.21388  |
| 7926_13_§finngen_R outcome | 7926_13_§Weighted    | 43 | 0.194193 | 0.10911  | 0.082347 |
| 7955_195_finngen_R outcome | 7955_195_MR Egger    | 65 | -0.00567 | 0.07325  | 0.938588 |
| 7955_195_finngen_R outcome | 7955_195_Weighted    | 65 | -0.00165 | 0.064818 | 0.979675 |
| 7955_195_finngen_R outcome | 7955_195_Inverse va  | 65 | -0.01346 | 0.040766 | 0.741321 |
| 7955_195_finngen_R outcome | 7955_195_Simple mc   | 65 | -0.03597 | 0.11558  | 0.756659 |
| 7955_195_finngen_R outcome | 7955_195_Weighted    | 65 | 0.004144 | 0.053289 | 0.938256 |
| 7957_2_§Cfinngen_R outcome | 7957_2_§C MR Egger   | 55 | -0.04562 | 0.097572 | 0.642015 |
| 7957_2_§Cfinngen_R outcome | 7957_2_§C Weighted   | 55 | -0.00595 | 0.087231 | 0.945663 |
| 7957_2_§Cfinngen_R outcome | 7957_2_§C Inverse va | 55 | 0.022896 | 0.055372 | 0.679241 |
| 7957_2_§Cfinngen_R outcome | 7957_2_§C Simple mc  | 55 | 0.085606 | 0.15765  | 0.589356 |
| 7957_2_§Cfinngen_R outcome | 7957_2_§C Weighted   | 55 | 0.007392 | 0.091455 | 0.935882 |
| 7968_15_Cfinngen_R outcome | 7968_15_C MR Egger   | 41 | 0.209584 | 0.114456 | 0.074729 |
| 7968_15_Cfinngen_R outcome | 7968_15_C Weighted   | 41 | 0.149735 | 0.091015 | 0.099935 |
| 7968_15_Cfinngen_R outcome | 7968_15_C Inverse va | 41 | 0.124325 | 0.06496  | 0.055638 |
| 7968_15_Cfinngen_R outcome | 7968_15_C Simple mc  | 41 | 0.237369 | 0.149415 | 0.120012 |
| 7968_15_Cfinngen_R outcome | 7968_15_C Weighted   | 41 | 0.153098 | 0.082811 | 0.071891 |
| 7999_23_Efinngen_R outcome | 7999_23_E MR Egger   | 9  | -0.11691 | 0.316011 | 0.722348 |
| 7999_23_Efinngen_R outcome | 7999_23_E Weighted   | 9  | 0.011526 | 0.224518 | 0.959058 |
| 7999_23_Efinngen_R outcome | 7999_23_E Inverse va | 9  | 0.018147 | 0.171234 | 0.915602 |
| 7999_23_Efinngen_R outcome | 7999_23_E Simple mc  | 9  | 0.212727 | 0.327959 | 0.534744 |
| 7999_23_Efinngen_R outcome | 7999_23_E Weighted   | 9  | -0.02136 | 0.243156 | 0.932159 |
| 8007_19_Cfinngen_R outcome | 8007_19_C MR Egger   | 87 | -0.04649 | 0.056059 | 0.409299 |
| 8007_19_Cfinngen_R outcome | 8007_19_C Weighted   | 87 | -0.13251 | 0.052117 | 0.011004 |
| 8007_19_Cfinngen_R outcome | 8007_19_C Inverse va | 87 | -0.16702 | 0.032993 | 4.14E-07 |
| 8007_19_Cfinngen_R outcome | 8007_19_C Simple mc  | 87 | -0.18888 | 0.085201 | 0.029272 |
| 8007_19_Cfinngen_R outcome | 8007_19_C Weighted   | 87 | -0.14757 | 0.044153 | 0.001232 |
| 8028_22_§finngen_R outcome | 8028_22_§MR Egger    | 6  | -0.23554 | 0.409794 | 0.596227 |
| 8028_22_§finngen_R outcome | 8028_22_§Weighted    | 6  | -0.15592 | 0.206759 | 0.450773 |
| 8028_22_§finngen_R outcome | 8028_22_§Inverse va  | 6  | -0.24803 | 0.161052 | 0.123541 |
| 8028_22_§finngen_R outcome | 8028_22_§Simple mc   | 6  | -0.75396 | 0.330016 | 0.071125 |
| 8028_22_§finngen_R outcome | 8028_22_§Weighted    | 6  | -0.07823 | 0.233565 | 0.751268 |
| 8043_153_finngen_R outcome | 8043_153_MR Egger    | 14 | 0.198559 | 0.239089 | 0.422483 |
| 8043_153_finngen_R outcome | 8043_153_Weighted    | 14 | 0.203218 | 0.168868 | 0.228815 |
| 8043_153_finngen_R outcome | 8043_153_Inverse va  | 14 | 0.089649 | 0.124883 | 0.472842 |
| 8043_153_finngen_R outcome | 8043_153_Simple mc   | 14 | -0.18853 | 0.261154 | 0.483136 |
| 8043_153_finngen_R outcome | 8043_153_Weighted    | 14 | 0.149108 | 0.167637 | 0.389915 |
| 8065_245_finngen_R outcome | 8065_245_MR Egger    | 5  | -0.19635 | 0.555435 | 0.747093 |
| 8065_245_finngen_R outcome | 8065_245_Weighted    | 5  | -0.14097 | 0.239854 | 0.556703 |
| 8065_245_finngen_R outcome | 8065_245_Inverse va  | 5  | -0.17409 | 0.208739 | 0.404272 |
| 8065_245_finngen_R outcome | 8065_245_Simple mc   | 5  | -0.14522 | 0.335193 | 0.687181 |

|                             |                      |     |          |          |          |
|-----------------------------|----------------------|-----|----------|----------|----------|
| 8065_245_finngen_R outcome  | 8065_245_Weighted    | 5   | -0.13834 | 0.27563  | 0.642111 |
| 8080_24_Mfinngen_R outcome  | 8080_24_MWald ratio  | 1   | -0.43959 | 0.555131 | 0.428439 |
| 8097_77_Lfinngen_R outcome  | 8097_77_LMR Egger    | 133 | 0.066662 | 0.047942 | 0.166741 |
| 8097_77_Lfinngen_R outcome  | 8097_77_LWeighted    | 133 | 0.100178 | 0.044564 | 0.024579 |
| 8097_77_Lfinngen_R outcome  | 8097_77_LInverse va  | 133 | 0.093609 | 0.027698 | 0.000726 |
| 8097_77_Lfinngen_R outcome  | 8097_77_LSimple mc   | 133 | -0.00945 | 0.081047 | 0.907384 |
| 8097_77_Lfinngen_R outcome  | 8097_77_LWeighted    | 133 | 0.07665  | 0.044756 | 0.089132 |
| 8099_42_Sfinngen_R outcome  | 8099_42_SMR Egger    | 31  | -0.23609 | 0.124778 | 0.068508 |
| 8099_42_Sfinngen_R outcome  | 8099_42_SWeighted    | 31  | -0.17259 | 0.09866  | 0.080239 |
| 8099_42_Sfinngen_R outcome  | 8099_42_SInverse va  | 31  | -0.15187 | 0.067161 | 0.023741 |
| 8099_42_Sfinngen_R outcome  | 8099_42_SSimple mc   | 31  | -0.19667 | 0.163132 | 0.237391 |
| 8099_42_Sfinngen_R outcome  | 8099_42_SWeighted    | 31  | -0.1655  | 0.095775 | 0.094276 |
| 8100_15_ffinngen_R outcome  | 8100_15_fMR Egger    | 5   | -0.42433 | 0.482733 | 0.444112 |
| 8100_15_ffinngen_R outcome  | 8100_15_fWeighted    | 5   | -0.13345 | 0.28065  | 0.634435 |
| 8100_15_ffinngen_R outcome  | 8100_15_fInverse va  | 5   | -0.19594 | 0.238256 | 0.41086  |
| 8100_15_ffinngen_R outcome  | 8100_15_fSimple mc   | 5   | -0.20982 | 0.436496 | 0.655852 |
| 8100_15_ffinngen_R outcome  | 8100_15_fWeighted    | 5   | -0.13759 | 0.287747 | 0.657497 |
| 8221_19_Mfinngen_R outcome  | 8221_19_MWald ratio  | 1   | -1.38618 | 0.764295 | 0.069729 |
| 8225_86_Efinngen_R outcome  | 8225_86_EMR Egger    | 16  | -0.17963 | 0.347285 | 0.61306  |
| 8225_86_Efinngen_R outcome  | 8225_86_EWeighted    | 16  | 0.197254 | 0.194362 | 0.310163 |
| 8225_86_Efinngen_R outcome  | 8225_86_EInverse va  | 16  | 0.106739 | 0.138835 | 0.441999 |
| 8225_86_Efinngen_R outcome  | 8225_86_ESimple mc   | 16  | 0.223116 | 0.322738 | 0.499923 |
| 8225_86_Efinngen_R outcome  | 8225_86_EWeighted    | 16  | 0.291571 | 0.267769 | 0.293389 |
| 8231_122_finngen_R outcome  | 8231_122_Wald ratio  | 1   | -1.01618 | 0.69143  | 0.141648 |
| 8233_2_ITIfinngen_R outcome | 8233_2_ITIMR Egger   | 94  | 0.10472  | 0.088208 | 0.238208 |
| 8233_2_ITIfinngen_R outcome | 8233_2_ITIWeighted   | 94  | 0.026518 | 0.065534 | 0.685741 |
| 8233_2_ITIfinngen_R outcome | 8233_2_ITIInverse va | 94  | 0.039834 | 0.043747 | 0.362535 |
| 8233_2_ITIfinngen_R outcome | 8233_2_ITISimple mc  | 94  | -0.0629  | 0.13271  | 0.63663  |
| 8233_2_ITIfinngen_R outcome | 8233_2_ITIWeighted   | 94  | 0.051731 | 0.075256 | 0.493541 |
| 8235_48_Cfinngen_R outcome  | 8235_48_CWald ratio  | 1   | 0.684974 | 0.404525 | 0.090402 |
| 8243_55_Sfinngen_R outcome  | 8243_55_SMR Egger    | 4   | 1.099564 | 0.733958 | 0.272821 |
| 8243_55_Sfinngen_R outcome  | 8243_55_SWeighted    | 4   | 0.265436 | 0.29146  | 0.362448 |
| 8243_55_Sfinngen_R outcome  | 8243_55_SInverse va  | 4   | 0.095951 | 0.267073 | 0.719394 |
| 8243_55_Sfinngen_R outcome  | 8243_55_SSimple mc   | 4   | 0.183162 | 0.521751 | 0.748755 |
| 8243_55_Sfinngen_R outcome  | 8243_55_SWeighted    | 4   | 0.288897 | 0.307776 | 0.417152 |
| 8250_2_PTfinngen_R outcome  | 8250_2_PTMR Egger    | 8   | 0.017132 | 0.312738 | 0.958093 |
| 8250_2_PTfinngen_R outcome  | 8250_2_PTWeighted    | 8   | -0.0594  | 0.226839 | 0.793418 |
| 8250_2_PTfinngen_R outcome  | 8250_2_PTInverse va  | 8   | -0.13876 | 0.180926 | 0.443101 |
| 8250_2_PTfinngen_R outcome  | 8250_2_PTSimple mc   | 8   | -0.07681 | 0.31936  | 0.816814 |
| 8250_2_PTfinngen_R outcome  | 8250_2_PTWeighted    | 8   | -0.04086 | 0.279445 | 0.887864 |
| 8252_2_Nfinngen_R outcome   | 8252_2_NMR Egger     | 10  | 0.210597 | 0.351174 | 0.565305 |
| 8252_2_Nfinngen_R outcome   | 8252_2_NWeighted     | 10  | -0.11145 | 0.220083 | 0.612576 |
| 8252_2_Nfinngen_R outcome   | 8252_2_NInverse va   | 10  | -0.04867 | 0.16854  | 0.772766 |
| 8252_2_Nfinngen_R outcome   | 8252_2_NSimple mc    | 10  | -0.02508 | 0.282542 | 0.931212 |
| 8252_2_Nfinngen_R outcome   | 8252_2_NWeighted     | 10  | -0.06001 | 0.225518 | 0.796147 |
| 8288_27_ffinngen_R outcome  | 8288_27_fMR Egger    | 18  | 0.11984  | 0.106503 | 0.27709  |
| 8288_27_ffinngen_R outcome  | 8288_27_fWeighted    | 18  | 0.095221 | 0.100066 | 0.341312 |
| 8288_27_ffinngen_R outcome  | 8288_27_fInverse va  | 18  | 0.112429 | 0.080633 | 0.163219 |
| 8288_27_ffinngen_R outcome  | 8288_27_fSimple mc   | 18  | 0.115234 | 0.196673 | 0.565631 |
| 8288_27_ffinngen_R outcome  | 8288_27_fWeighted    | 18  | 0.088922 | 0.105911 | 0.412793 |
| 8289_8_Gfinngen_R outcome   | 8289_8_GfMR Egger    | 26  | -0.22868 | 0.167016 | 0.183617 |
| 8289_8_Gfinngen_R outcome   | 8289_8_GfWeighted    | 26  | -0.03662 | 0.127552 | 0.774055 |
| 8289_8_Gfinngen_R outcome   | 8289_8_GfInverse va  | 26  | -0.05758 | 0.089377 | 0.519431 |
| 8289_8_Gfinngen_R outcome   | 8289_8_GfSimple mc   | 26  | -0.11259 | 0.207281 | 0.591806 |
| 8289_8_Gfinngen_R outcome   | 8289_8_GfWeighted    | 26  | -0.06235 | 0.121433 | 0.612172 |
| 8299_66_Lfinngen_R outcome  | 8299_66_LMR Egger    | 58  | 0.130025 | 0.089066 | 0.149913 |
| 8299_66_Lfinngen_R outcome  | 8299_66_LWeighted    | 58  | 0.069148 | 0.072361 | 0.339275 |
| 8299_66_Lfinngen_R outcome  | 8299_66_LInverse va  | 58  | 0.123793 | 0.050125 | 0.013524 |

|                             |                      |    |          |          |          |
|-----------------------------|----------------------|----|----------|----------|----------|
| 8299_66_L finngen_R outcome | 8299_66_L Simple mc  | 58 | 0.08388  | 0.134659 | 0.535829 |
| 8299_66_L finngen_R outcome | 8299_66_L Weighted   | 58 | 0.117085 | 0.076369 | 0.130772 |
| 8304_50_T finngen_R outcome | 8304_50_T MR Egger   | 27 | -0.14483 | 0.276706 | 0.605296 |
| 8304_50_T finngen_R outcome | 8304_50_T Weighted   | 27 | -0.19391 | 0.155362 | 0.211983 |
| 8304_50_T finngen_R outcome | 8304_50_T Inverse va | 27 | -0.15236 | 0.10473  | 0.145727 |
| 8304_50_T finngen_R outcome | 8304_50_T Simple mc  | 27 | -0.13541 | 0.312497 | 0.668349 |
| 8304_50_T finngen_R outcome | 8304_50_T Weighted   | 27 | -0.21172 | 0.197917 | 0.294569 |
| 8309_12_T finngen_R outcome | 8309_12_T MR Egger   | 4  | 0.904919 | 0.405263 | 0.155186 |
| 8309_12_T finngen_R outcome | 8309_12_T Weighted   | 4  | 0.726469 | 0.283685 | 0.010442 |
| 8309_12_T finngen_R outcome | 8309_12_T Inverse va | 4  | 0.701168 | 0.259373 | 0.006865 |
| 8309_12_T finngen_R outcome | 8309_12_T Simple mc  | 4  | 0.603814 | 0.4402   | 0.263746 |
| 8309_12_T finngen_R outcome | 8309_12_T Weighted   | 4  | 0.737014 | 0.28835  | 0.083507 |
| 8323_163_finngen_R outcome  | 8323_163_Inverse va  | 2  | 0.475822 | 0.407809 | 0.243301 |
| 8325_37_F finngen_R outcome | 8325_37_F MR Egger   | 3  | -0.23569 | 1.090806 | 0.864529 |
| 8325_37_F finngen_R outcome | 8325_37_F Weighted   | 3  | -0.04419 | 0.355268 | 0.90101  |
| 8325_37_F finngen_R outcome | 8325_37_F Inverse va | 3  | -0.036   | 0.31012  | 0.907591 |
| 8325_37_F finngen_R outcome | 8325_37_F Simple mc  | 3  | 0.011535 | 0.397652 | 0.979493 |
| 8325_37_F finngen_R outcome | 8325_37_F Weighted   | 3  | -0.05827 | 0.422012 | 0.902825 |
| 8327_26_C finngen_R outcome | 8327_26_C MR Egger   | 7  | -0.32291 | 0.556279 | 0.586763 |
| 8327_26_C finngen_R outcome | 8327_26_C Weighted   | 7  | 0.084722 | 0.18819  | 0.652568 |
| 8327_26_C finngen_R outcome | 8327_26_C Inverse va | 7  | 0.030239 | 0.148557 | 0.838706 |
| 8327_26_C finngen_R outcome | 8327_26_C Simple mc  | 7  | 0.060133 | 0.215954 | 0.790012 |
| 8327_26_C finngen_R outcome | 8327_26_C Weighted   | 7  | 0.097535 | 0.176341 | 0.600175 |
| 8345_27_C finngen_R outcome | 8345_27_C MR Egger   | 51 | 0.105382 | 0.077793 | 0.181744 |
| 8345_27_C finngen_R outcome | 8345_27_C Weighted   | 51 | 0.127828 | 0.066606 | 0.054962 |
| 8345_27_C finngen_R outcome | 8345_27_C Inverse va | 51 | 0.030247 | 0.049525 | 0.541377 |
| 8345_27_C finngen_R outcome | 8345_27_C Simple mc  | 51 | 0.156987 | 0.128219 | 0.226551 |
| 8345_27_C finngen_R outcome | 8345_27_C Weighted   | 51 | 0.129983 | 0.060606 | 0.036859 |
| 8346_9_Df finngen_R outcome | 8346_9_Df MR Egger   | 63 | 0.023503 | 0.068471 | 0.732588 |
| 8346_9_Df finngen_R outcome | 8346_9_Df Weighted   | 63 | 0.047191 | 0.068451 | 0.490564 |
| 8346_9_Df finngen_R outcome | 8346_9_Df Inverse va | 63 | 0.059942 | 0.043573 | 0.168928 |
| 8346_9_Df finngen_R outcome | 8346_9_Df Simple mc  | 63 | 0.144714 | 0.120227 | 0.23329  |
| 8346_9_Df finngen_R outcome | 8346_9_Df Weighted   | 63 | 0.054203 | 0.060113 | 0.370712 |
| 8356_88_C finngen_R outcome | 8356_88_C MR Egger   | 41 | -0.1008  | 0.115837 | 0.389529 |
| 8356_88_C finngen_R outcome | 8356_88_C Weighted   | 41 | -0.05944 | 0.095673 | 0.534414 |
| 8356_88_C finngen_R outcome | 8356_88_C Inverse va | 41 | -0.06718 | 0.064035 | 0.294155 |
| 8356_88_C finngen_R outcome | 8356_88_C Simple mc  | 41 | -0.12432 | 0.186882 | 0.50972  |
| 8356_88_C finngen_R outcome | 8356_88_C Weighted   | 41 | -0.08602 | 0.087152 | 0.329558 |
| 8360_169_finngen_R outcome  | 8360_169_MR Egger    | 23 | 0.162579 | 0.141669 | 0.264043 |
| 8360_169_finngen_R outcome  | 8360_169_Weighted    | 23 | 0.154043 | 0.100361 | 0.12481  |
| 8360_169_finngen_R outcome  | 8360_169_Inverse va  | 23 | 0.094913 | 0.075054 | 0.206016 |
| 8360_169_finngen_R outcome  | 8360_169_Simple mc   | 23 | 0.099927 | 0.153007 | 0.520466 |
| 8360_169_finngen_R outcome  | 8360_169_Weighted    | 23 | 0.148713 | 0.096091 | 0.135979 |
| 8368_102_finngen_R outcome  | 8368_102_MR Egger    | 8  | 0.288004 | 0.206162 | 0.211902 |
| 8368_102_finngen_R outcome  | 8368_102_Weighted    | 8  | 0.237307 | 0.155295 | 0.126487 |
| 8368_102_finngen_R outcome  | 8368_102_Inverse va  | 8  | 0.150194 | 0.121542 | 0.216557 |
| 8368_102_finngen_R outcome  | 8368_102_Simple mc   | 8  | 0.340787 | 0.26045  | 0.232041 |
| 8368_102_finngen_R outcome  | 8368_102_Weighted    | 8  | 0.210243 | 0.213068 | 0.356639 |
| 8376_25_L finngen_R outcome | 8376_25_L MR Egger   | 25 | -0.24844 | 0.124093 | 0.057207 |
| 8376_25_L finngen_R outcome | 8376_25_L Weighted   | 25 | -0.13996 | 0.104951 | 0.18235  |
| 8376_25_L finngen_R outcome | 8376_25_L Inverse va | 25 | -0.16611 | 0.079132 | 0.035808 |
| 8376_25_L finngen_R outcome | 8376_25_L Simple mc  | 25 | -0.31095 | 0.215703 | 0.162353 |
| 8376_25_L finngen_R outcome | 8376_25_L Weighted   | 25 | -0.19532 | 0.108865 | 0.085394 |
| 8394_56_F finngen_R outcome | 8394_56_F MR Egger   | 4  | 0.122107 | 0.45008  | 0.811596 |
| 8394_56_F finngen_R outcome | 8394_56_F Weighted   | 4  | -0.40566 | 0.215517 | 0.059801 |
| 8394_56_F finngen_R outcome | 8394_56_F Inverse va | 4  | -0.41147 | 0.198433 | 0.038118 |
| 8394_56_F finngen_R outcome | 8394_56_F Simple mc  | 4  | -0.74592 | 0.438935 | 0.187809 |
| 8394_56_F finngen_R outcome | 8394_56_F Weighted   | 4  | -0.23387 | 0.237195 | 0.396847 |

|                             |                      |     |          |          |          |
|-----------------------------|----------------------|-----|----------|----------|----------|
| 8397_147_finngen_R outcome  | 8397_147_MR Egger    | 53  | -0.07732 | 0.099048 | 0.438616 |
| 8397_147_finngen_R outcome  | 8397_147_Weighted    | 53  | -0.05357 | 0.086817 | 0.537203 |
| 8397_147_finngen_R outcome  | 8397_147_Inverse va  | 53  | -0.10082 | 0.055384 | 0.068705 |
| 8397_147_finngen_R outcome  | 8397_147_Simple mc   | 53  | -0.0584  | 0.145895 | 0.690562 |
| 8397_147_finngen_R outcome  | 8397_147_Weighted    | 53  | -0.04228 | 0.077524 | 0.58784  |
| 8402_22_C finngen_R outcome | 8402_22_C MR Egger   | 37  | -0.08964 | 0.080222 | 0.271453 |
| 8402_22_C finngen_R outcome | 8402_22_C Weighted   | 37  | -0.09848 | 0.078364 | 0.20888  |
| 8402_22_C finngen_R outcome | 8402_22_C Inverse va | 37  | -0.10924 | 0.055018 | 0.047087 |
| 8402_22_C finngen_R outcome | 8402_22_C Simple mc  | 37  | -0.121   | 0.142555 | 0.401591 |
| 8402_22_C finngen_R outcome | 8402_22_C Weighted   | 37  | -0.08946 | 0.066711 | 0.188333 |
| 8403_18_F finngen_R outcome | 8403_18_F MR Egger   | 8   | -0.70459 | 0.652506 | 0.321704 |
| 8403_18_F finngen_R outcome | 8403_18_F Weighted   | 8   | -0.55057 | 0.296024 | 0.062904 |
| 8403_18_F finngen_R outcome | 8403_18_F Inverse va | 8   | -0.48132 | 0.221571 | 0.029833 |
| 8403_18_F finngen_R outcome | 8403_18_F Simple mc  | 8   | -0.66037 | 0.444764 | 0.181184 |
| 8403_18_F finngen_R outcome | 8403_18_F Weighted   | 8   | -0.61959 | 0.336151 | 0.10784  |
| 8427_118_finngen_R outcome  | 8427_118_MR Egger    | 23  | 0.28688  | 0.206333 | 0.178977 |
| 8427_118_finngen_R outcome  | 8427_118_Weighted    | 23  | 0.230963 | 0.125764 | 0.066288 |
| 8427_118_finngen_R outcome  | 8427_118_Inverse va  | 23  | 0.374251 | 0.102491 | 0.000261 |
| 8427_118_finngen_R outcome  | 8427_118_Simple mc   | 23  | 0.556874 | 0.202543 | 0.011702 |
| 8427_118_finngen_R outcome  | 8427_118_Weighted    | 23  | 0.241628 | 0.125114 | 0.066434 |
| 8428_102_finngen_R outcome  | 8428_102_MR Egger    | 86  | 0.002344 | 0.079732 | 0.976618 |
| 8428_102_finngen_R outcome  | 8428_102_Weighted    | 86  | -0.00274 | 0.068363 | 0.967974 |
| 8428_102_finngen_R outcome  | 8428_102_Inverse va  | 86  | 0.054183 | 0.04578  | 0.236593 |
| 8428_102_finngen_R outcome  | 8428_102_Simple mc   | 86  | 0.058672 | 0.125319 | 0.640852 |
| 8428_102_finngen_R outcome  | 8428_102_Weighted    | 86  | 0.02727  | 0.062024 | 0.661288 |
| 8458_111_finngen_R outcome  | 8458_111_Wald ratio  | 1   | 0.243393 | 0.755165 | 0.747222 |
| 8464_31_F finngen_R outcome | 8464_31_F MR Egger   | 6   | -0.20774 | 0.624692 | 0.756177 |
| 8464_31_F finngen_R outcome | 8464_31_F Weighted   | 6   | 0.499214 | 0.275002 | 0.069476 |
| 8464_31_F finngen_R outcome | 8464_31_F Inverse va | 6   | 0.372127 | 0.234233 | 0.112127 |
| 8464_31_F finngen_R outcome | 8464_31_F Simple mc  | 6   | 0.621128 | 0.377325 | 0.160654 |
| 8464_31_F finngen_R outcome | 8464_31_F Weighted   | 6   | 0.536748 | 0.323588 | 0.158065 |
| 8465_52_C finngen_R outcome | 8465_52_C MR Egger   | 151 | 0.032986 | 0.044899 | 0.463702 |
| 8465_52_C finngen_R outcome | 8465_52_C Weighted   | 151 | 0.018241 | 0.041156 | 0.657605 |
| 8465_52_C finngen_R outcome | 8465_52_C Inverse va | 151 | 0.036279 | 0.027447 | 0.186246 |
| 8465_52_C finngen_R outcome | 8465_52_C Simple mc  | 151 | -0.02301 | 0.082663 | 0.781127 |
| 8465_52_C finngen_R outcome | 8465_52_C Weighted   | 151 | 0.022863 | 0.040734 | 0.575439 |
| 8468_19_k finngen_R outcome | 8468_19_k Inverse va | 2   | 0.75716  | 0.536463 | 0.158128 |
| 8469_41_l finngen_R outcome | 8469_41_l Inverse va | 2   | -0.06955 | 0.602842 | 0.908153 |
| 8476_11_C finngen_R outcome | 8476_11_C MR Egger   | 20  | 0.139518 | 0.155197 | 0.380536 |
| 8476_11_C finngen_R outcome | 8476_11_C Weighted   | 20  | 0.016875 | 0.131017 | 0.897513 |
| 8476_11_C finngen_R outcome | 8476_11_C Inverse va | 20  | 0.035911 | 0.096435 | 0.709607 |
| 8476_11_C finngen_R outcome | 8476_11_C Simple mc  | 20  | -0.05264 | 0.255365 | 0.838872 |
| 8476_11_C finngen_R outcome | 8476_11_C Weighted   | 20  | 0.017754 | 0.13752  | 0.898633 |
| 8479_4_M finngen_R outcome  | 8479_4_M MR Egger    | 85  | -0.01446 | 0.08999  | 0.87272  |
| 8479_4_M finngen_R outcome  | 8479_4_M Weighted    | 85  | 0.007542 | 0.069899 | 0.914071 |
| 8479_4_M finngen_R outcome  | 8479_4_M Inverse va  | 85  | -0.00419 | 0.045783 | 0.927074 |
| 8479_4_M finngen_R outcome  | 8479_4_M Simple mc   | 85  | 0.058004 | 0.124608 | 0.642785 |
| 8479_4_M finngen_R outcome  | 8479_4_M Weighted    | 85  | 0.017327 | 0.072334 | 0.811269 |
| 8480_29_E finngen_R outcome | 8480_29_E MR Egger   | 10  | -0.3184  | 0.350868 | 0.390675 |
| 8480_29_E finngen_R outcome | 8480_29_E Weighted   | 10  | -0.18904 | 0.204367 | 0.354969 |
| 8480_29_E finngen_R outcome | 8480_29_E Inverse va | 10  | -0.05469 | 0.155158 | 0.72446  |
| 8480_29_E finngen_R outcome | 8480_29_E Simple mc  | 10  | -0.12086 | 0.328223 | 0.721228 |
| 8480_29_E finngen_R outcome | 8480_29_E Weighted   | 10  | -0.16359 | 0.21209  | 0.460283 |
| 8606_39_C finngen_R outcome | 8606_39_C MR Egger   | 43  | -0.05864 | 0.085295 | 0.495655 |
| 8606_39_C finngen_R outcome | 8606_39_C Weighted   | 43  | 0.083524 | 0.088393 | 0.344702 |
| 8606_39_C finngen_R outcome | 8606_39_C Inverse va | 43  | 0.032246 | 0.056978 | 0.571435 |
| 8606_39_C finngen_R outcome | 8606_39_C Simple mc  | 43  | 0.34618  | 0.206039 | 0.10035  |
| 8606_39_C finngen_R outcome | 8606_39_C Weighted   | 43  | 0.063795 | 0.081988 | 0.440874 |

|                             |                      |    |          |          |          |
|-----------------------------|----------------------|----|----------|----------|----------|
| 8660_5_OI finngen_R outcome | 8660_5_OI MR Egger   | 3  | 0.171816 | 1.564805 | 0.930378 |
| 8660_5_OI finngen_R outcome | 8660_5_OI Weighted   | 3  | 0.141044 | 0.3477   | 0.685    |
| 8660_5_OI finngen_R outcome | 8660_5_OI Inverse va | 3  | 0.276975 | 0.306659 | 0.366419 |
| 8660_5_OI finngen_R outcome | 8660_5_OI Simple mc  | 3  | 0.05613  | 0.479362 | 0.917485 |
| 8660_5_OI finngen_R outcome | 8660_5_OI Weighted   | 3  | 0.06194  | 0.415982 | 0.89529  |
| 8697_38_C finngen_R outcome | 8697_38_C MR Egger   | 53 | 0.090381 | 0.083553 | 0.284464 |
| 8697_38_C finngen_R outcome | 8697_38_C Weighted   | 53 | 0.073111 | 0.074303 | 0.325135 |
| 8697_38_C finngen_R outcome | 8697_38_C Inverse va | 53 | 0.078483 | 0.055199 | 0.15508  |
| 8697_38_C finngen_R outcome | 8697_38_C Simple mc  | 53 | 0.144577 | 0.158712 | 0.366531 |
| 8697_38_C finngen_R outcome | 8697_38_C Weighted   | 53 | 0.088079 | 0.068512 | 0.20428  |
| 8766_29_L finngen_R outcome | 8766_29_L MR Egger   | 47 | -0.02914 | 0.089918 | 0.747354 |
| 8766_29_L finngen_R outcome | 8766_29_L Weighted   | 47 | -0.00295 | 0.071928 | 0.967249 |
| 8766_29_L finngen_R outcome | 8766_29_L Inverse va | 47 | -0.0123  | 0.052326 | 0.814196 |
| 8766_29_L finngen_R outcome | 8766_29_L Simple mc  | 47 | 0.131323 | 0.15262  | 0.394001 |
| 8766_29_L finngen_R outcome | 8766_29_L Weighted   | 47 | 0.026325 | 0.065428 | 0.689288 |
| 8773_172_finngen_R outcome  | 8773_172 MR Egger    | 36 | 0.226949 | 0.115991 | 0.058647 |
| 8773_172_finngen_R outcome  | 8773_172 Weighted    | 36 | 0.088149 | 0.09922  | 0.374314 |
| 8773_172_finngen_R outcome  | 8773_172 Inverse va  | 36 | 0.06329  | 0.067059 | 0.345274 |
| 8773_172_finngen_R outcome  | 8773_172 Simple mc   | 36 | 0.10186  | 0.145999 | 0.489987 |
| 8773_172_finngen_R outcome  | 8773_172 Weighted    | 36 | 0.074918 | 0.102687 | 0.470504 |
| 8778_3_NI finngen_R outcome | 8778_3_NI MR Egger   | 17 | -0.00215 | 0.146521 | 0.988501 |
| 8778_3_NI finngen_R outcome | 8778_3_NI Weighted   | 17 | -0.04049 | 0.113571 | 0.721438 |
| 8778_3_NI finngen_R outcome | 8778_3_NI Inverse va | 17 | -0.02152 | 0.110174 | 0.845127 |
| 8778_3_NI finngen_R outcome | 8778_3_NI Simple mc  | 17 | 0.047198 | 0.211921 | 0.826576 |
| 8778_3_NI finngen_R outcome | 8778_3_NI Weighted   | 17 | -0.04488 | 0.107381 | 0.681527 |
| 8794_13_L finngen_R outcome | 8794_13_L MR Egger   | 87 | -0.00732 | 0.07671  | 0.92424  |
| 8794_13_L finngen_R outcome | 8794_13_L Weighted   | 87 | -0.06355 | 0.064413 | 0.323813 |
| 8794_13_L finngen_R outcome | 8794_13_L Inverse va | 87 | -0.06219 | 0.038679 | 0.107846 |
| 8794_13_L finngen_R outcome | 8794_13_L Simple mc  | 87 | -0.00746 | 0.115914 | 0.948853 |
| 8794_13_L finngen_R outcome | 8794_13_L Weighted   | 87 | -0.0747  | 0.067352 | 0.270459 |
| 8795_48_T finngen_R outcome | 8795_48_T MR Egger   | 3  | 4.839327 | 7.163457 | 0.621763 |
| 8795_48_T finngen_R outcome | 8795_48_T Weighted   | 3  | -0.15111 | 0.475225 | 0.7505   |
| 8795_48_T finngen_R outcome | 8795_48_T Inverse va | 3  | -0.21578 | 0.651856 | 0.740626 |
| 8795_48_T finngen_R outcome | 8795_48_T Simple mc  | 3  | -0.00446 | 0.68885  | 0.995425 |
| 8795_48_T finngen_R outcome | 8795_48_T Weighted   | 3  | -0.11819 | 0.593932 | 0.860663 |
| 8840_61_C finngen_R outcome | 8840_61_C MR Egger   | 11 | -0.20644 | 0.282233 | 0.48312  |
| 8840_61_C finngen_R outcome | 8840_61_C Weighted   | 11 | -0.06504 | 0.182993 | 0.722275 |
| 8840_61_C finngen_R outcome | 8840_61_C Inverse va | 11 | -0.07187 | 0.1454   | 0.621098 |
| 8840_61_C finngen_R outcome | 8840_61_C Simple mc  | 11 | -0.1069  | 0.271834 | 0.702376 |
| 8840_61_C finngen_R outcome | 8840_61_C Weighted   | 11 | -0.17024 | 0.221837 | 0.460573 |
| 8841_65_C finngen_R outcome | 8841_65_C MR Egger   | 5  | 0.105152 | 0.944337 | 0.91837  |
| 8841_65_C finngen_R outcome | 8841_65_C Weighted   | 5  | 0.270311 | 0.355769 | 0.447378 |
| 8841_65_C finngen_R outcome | 8841_65_C Inverse va | 5  | 0.110168 | 0.294857 | 0.70868  |
| 8841_65_C finngen_R outcome | 8841_65_C Simple mc  | 5  | 0.425703 | 0.526878 | 0.464415 |
| 8841_65_C finngen_R outcome | 8841_65_C Weighted   | 5  | 0.297845 | 0.417476 | 0.514988 |
| 8859_51_C finngen_R outcome | 8859_51_C MR Egger   | 3  | 0.392807 | 0.458621 | 0.549112 |
| 8859_51_C finngen_R outcome | 8859_51_C Weighted   | 3  | -0.13463 | 0.233211 | 0.563737 |
| 8859_51_C finngen_R outcome | 8859_51_C Inverse va | 3  | -0.22798 | 0.271703 | 0.40143  |
| 8859_51_C finngen_R outcome | 8859_51_C Simple mc  | 3  | -0.27151 | 0.433561 | 0.595107 |
| 8859_51_C finngen_R outcome | 8859_51_C Weighted   | 3  | -0.06462 | 0.251504 | 0.821255 |
| 8885_6_C/ finngen_R outcome | 8885_6_C/ MR Egger   | 62 | -0.0944  | 0.174263 | 0.590041 |
| 8885_6_C/ finngen_R outcome | 8885_6_C/ Weighted   | 62 | 0.039237 | 0.112382 | 0.726982 |
| 8885_6_C/ finngen_R outcome | 8885_6_C/ Inverse va | 62 | 0.079963 | 0.075441 | 0.289173 |
| 8885_6_C/ finngen_R outcome | 8885_6_C/ Simple mc  | 62 | 0.053516 | 0.235782 | 0.821205 |
| 8885_6_C/ finngen_R outcome | 8885_6_C/ Weighted   | 62 | 0.053516 | 0.200018 | 0.789945 |
| 8893_29_F finngen_R outcome | 8893_29_F Wald ratio | 1  | 1.054227 | 0.694251 | 0.128886 |
| 8925_25_F finngen_R outcome | 8925_25_F MR Egger   | 4  | 0.568173 | 0.383912 | 0.277018 |
| 8925_25_F finngen_R outcome | 8925_25_F Weighted   | 4  | 0.478531 | 0.217203 | 0.027584 |

|                             |                      |     |          |          |          |
|-----------------------------|----------------------|-----|----------|----------|----------|
| 8925_25_F finngen_R outcome | 8925_25_F Inverse va | 4   | 0.399806 | 0.211314 | 0.058491 |
| 8925_25_F finngen_R outcome | 8925_25_F Simple mc  | 4   | 0.607734 | 0.315728 | 0.14992  |
| 8925_25_F finngen_R outcome | 8925_25_F Weighted   | 4   | 0.424551 | 0.233465 | 0.166573 |
| 8932_1_EI finngen_R outcome | 8932_1_EI Inverse va | 2   | 0.578676 | 0.314952 | 0.066159 |
| 8953_47_I finngen_R outcome | 8953_47_I Wald ratio | 1   | -0.89084 | 0.482778 | 0.065001 |
| 8958_51_C finngen_R outcome | 8958_51_C MR Egger   | 41  | -0.07536 | 0.151859 | 0.622485 |
| 8958_51_C finngen_R outcome | 8958_51_C Weighted   | 41  | -0.01326 | 0.096631 | 0.890815 |
| 8958_51_C finngen_R outcome | 8958_51_C Inverse va | 41  | 0.039552 | 0.066054 | 0.54932  |
| 8958_51_C finngen_R outcome | 8958_51_C Simple mc  | 41  | -0.13401 | 0.151511 | 0.381707 |
| 8958_51_C finngen_R outcome | 8958_51_C Weighted   | 41  | -0.03847 | 0.103001 | 0.710749 |
| 8969_49_C finngen_R outcome | 8969_49_C MR Egger   | 19  | -0.43947 | 0.266807 | 0.117886 |
| 8969_49_C finngen_R outcome | 8969_49_C Weighted   | 19  | -0.43182 | 0.161205 | 0.007391 |
| 8969_49_C finngen_R outcome | 8969_49_C Inverse va | 19  | -0.2738  | 0.115623 | 0.017883 |
| 8969_49_C finngen_R outcome | 8969_49_C Simple mc  | 19  | -0.54185 | 0.263833 | 0.05482  |
| 8969_49_C finngen_R outcome | 8969_49_C Weighted   | 19  | -0.49943 | 0.173418 | 0.009968 |
| 8970_9_RI finngen_R outcome | 8970_9_RI Wald ratio | 1   | 0.069125 | 0.530731 | 0.896373 |
| 8973_23_F finngen_R outcome | 8973_23_F MR Egger   | 145 | -0.03072 | 0.039867 | 0.442248 |
| 8973_23_F finngen_R outcome | 8973_23_F Weighted   | 145 | -0.06564 | 0.037993 | 0.084025 |
| 8973_23_F finngen_R outcome | 8973_23_F Inverse va | 145 | -0.07143 | 0.024963 | 0.004216 |
| 8973_23_F finngen_R outcome | 8973_23_F Simple mc  | 145 | -0.12651 | 0.070241 | 0.073795 |
| 8973_23_F finngen_R outcome | 8973_23_F Weighted   | 145 | -0.06741 | 0.037829 | 0.076863 |
| 8974_172_finngen_R outcome  | 8974_172_MR Egger    | 21  | -0.22753 | 0.210561 | 0.293399 |
| 8974_172_finngen_R outcome  | 8974_172_Weighted    | 21  | -0.0935  | 0.128474 | 0.466742 |
| 8974_172_finngen_R outcome  | 8974_172_Inverse va  | 21  | -0.00769 | 0.092467 | 0.933728 |
| 8974_172_finngen_R outcome  | 8974_172_Simple mc   | 21  | -0.04478 | 0.223523 | 0.84323  |
| 8974_172_finngen_R outcome  | 8974_172_Weighted    | 21  | -0.12166 | 0.155129 | 0.442069 |
| 8982_65_T finngen_R outcome | 8982_65_T MR Egger   | 6   | 0.534072 | 0.485084 | 0.332701 |
| 8982_65_T finngen_R outcome | 8982_65_T Weighted   | 6   | -0.10847 | 0.338259 | 0.748457 |
| 8982_65_T finngen_R outcome | 8982_65_T Inverse va | 6   | 0.092307 | 0.257399 | 0.719884 |
| 8982_65_T finngen_R outcome | 8982_65_T Simple mc  | 6   | -0.04612 | 0.417339 | 0.916296 |
| 8982_65_T finngen_R outcome | 8982_65_T Weighted   | 6   | -0.114   | 0.368186 | 0.769341 |
| 8989_40_S finngen_R outcome | 8989_40_S MR Egger   | 18  | -0.22754 | 0.333261 | 0.504511 |
| 8989_40_S finngen_R outcome | 8989_40_S Weighted   | 18  | -0.29252 | 0.151669 | 0.053774 |
| 8989_40_S finngen_R outcome | 8989_40_S Inverse va | 18  | -0.1553  | 0.113174 | 0.169984 |
| 8989_40_S finngen_R outcome | 8989_40_S Simple mc  | 18  | -0.32738 | 0.21732  | 0.150307 |
| 8989_40_S finngen_R outcome | 8989_40_S Weighted   | 18  | -0.3455  | 0.174414 | 0.064019 |
| 9002_36_S finngen_R outcome | 9002_36_S MR Egger   | 41  | -0.22966 | 0.140571 | 0.110353 |
| 9002_36_S finngen_R outcome | 9002_36_S Weighted   | 41  | -0.15959 | 0.106177 | 0.132817 |
| 9002_36_S finngen_R outcome | 9002_36_S Inverse va | 41  | -0.17438 | 0.068692 | 0.011131 |
| 9002_36_S finngen_R outcome | 9002_36_S Simple mc  | 41  | -0.07957 | 0.194418 | 0.684506 |
| 9002_36_S finngen_R outcome | 9002_36_S Weighted   | 41  | -0.16672 | 0.107675 | 0.129412 |
| 9017_58_L finngen_R outcome | 9017_58_L MR Egger   | 56  | -0.01555 | 0.03795  | 0.683571 |
| 9017_58_L finngen_R outcome | 9017_58_L Weighted   | 56  | 0.020302 | 0.032354 | 0.530346 |
| 9017_58_L finngen_R outcome | 9017_58_L Inverse va | 56  | 0.027216 | 0.021188 | 0.198963 |
| 9017_58_L finngen_R outcome | 9017_58_L Simple mc  | 56  | 0.052455 | 0.064156 | 0.417108 |
| 9017_58_L finngen_R outcome | 9017_58_L Weighted   | 56  | 0.01337  | 0.044264 | 0.763762 |
| 9026_40_E finngen_R outcome | 9026_40_E Wald ratio | 1   | -0.3731  | 0.628586 | 0.552808 |
| 9076_25_F finngen_R outcome | 9076_25_F MR Egger   | 91  | -0.04101 | 0.066103 | 0.536583 |
| 9076_25_F finngen_R outcome | 9076_25_F Weighted   | 91  | -0.05341 | 0.051498 | 0.299634 |
| 9076_25_F finngen_R outcome | 9076_25_F Inverse va | 91  | -0.02542 | 0.031846 | 0.424679 |
| 9076_25_F finngen_R outcome | 9076_25_F Simple mc  | 91  | -0.07526 | 0.097452 | 0.441975 |
| 9076_25_F finngen_R outcome | 9076_25_F Weighted   | 91  | -0.06259 | 0.057181 | 0.276613 |
| 9092_33_A finngen_R outcome | 9092_33_A MR Egger   | 5   | 0.820789 | 1.072362 | 0.499737 |
| 9092_33_A finngen_R outcome | 9092_33_A Weighted   | 5   | -0.08983 | 0.368899 | 0.807615 |
| 9092_33_A finngen_R outcome | 9092_33_A Inverse va | 5   | -0.41399 | 0.298544 | 0.165537 |
| 9092_33_A finngen_R outcome | 9092_33_A Simple mc  | 5   | -0.22141 | 0.579362 | 0.721773 |
| 9092_33_A finngen_R outcome | 9092_33_A Weighted   | 5   | -0.07666 | 0.450775 | 0.873216 |
| 9094_5_CI finngen_R outcome | 9094_5_CI MR Egger   | 8   | -0.27529 | 0.735354 | 0.721006 |

|                              |                       |    |          |          |          |
|------------------------------|-----------------------|----|----------|----------|----------|
| 9094_5_CI finngen_R outcome  | 9094_5_CI Weighted    | 8  | -0.23139 | 0.29527  | 0.43325  |
| 9094_5_CI finngen_R outcome  | 9094_5_CI Inverse va  | 8  | -0.07203 | 0.221194 | 0.744685 |
| 9094_5_CI finngen_R outcome  | 9094_5_CI Simple mc   | 8  | -0.34322 | 0.468361 | 0.487478 |
| 9094_5_CI finngen_R outcome  | 9094_5_CI Weighted    | 8  | -0.36893 | 0.411686 | 0.39994  |
| 9172_69_M finngen_R outcome  | 9172_69_M MR Egger    | 17 | -0.35553 | 0.210038 | 0.111177 |
| 9172_69_M finngen_R outcome  | 9172_69_M Weighted    | 17 | -0.2001  | 0.151642 | 0.186976 |
| 9172_69_M finngen_R outcome  | 9172_69_M Inverse va  | 17 | -0.17643 | 0.147636 | 0.232074 |
| 9172_69_M finngen_R outcome  | 9172_69_M Simple mc   | 17 | -0.4342  | 0.256403 | 0.109751 |
| 9172_69_M finngen_R outcome  | 9172_69_M Weighted    | 17 | -0.2444  | 0.159847 | 0.145799 |
| 9175_48_C finngen_R outcome  | 9175_48_C MR Egger    | 7  | -0.13137 | 0.26002  | 0.634885 |
| 9175_48_C finngen_R outcome  | 9175_48_C Weighted    | 7  | -0.11668 | 0.189505 | 0.538079 |
| 9175_48_C finngen_R outcome  | 9175_48_C Inverse va  | 7  | -0.04891 | 0.166008 | 0.768294 |
| 9175_48_C finngen_R outcome  | 9175_48_C Simple mc   | 7  | -0.18386 | 0.274093 | 0.527324 |
| 9175_48_C finngen_R outcome  | 9175_48_C Weighted    | 7  | -0.12777 | 0.207292 | 0.560283 |
| 9177_6_FA finngen_R outcome  | 9177_6_FA MR Egger    | 63 | 0.03382  | 0.075569 | 0.656068 |
| 9177_6_FA finngen_R outcome  | 9177_6_FA Weighted    | 63 | -0.00045 | 0.080164 | 0.995515 |
| 9177_6_FA finngen_R outcome  | 9177_6_FA Inverse va  | 63 | 0.059233 | 0.051281 | 0.24806  |
| 9177_6_FA finngen_R outcome  | 9177_6_FA Simple mc   | 63 | -0.05166 | 0.169971 | 0.762197 |
| 9177_6_FA finngen_R outcome  | 9177_6_FA Weighted    | 63 | -0.00326 | 0.077684 | 0.966619 |
| 9183_7_IFI finngen_R outcome | 9183_7_IFI MR Egger   | 89 | -0.02082 | 0.060147 | 0.73012  |
| 9183_7_IFI finngen_R outcome | 9183_7_IFI Weighted   | 89 | -0.06349 | 0.05406  | 0.240233 |
| 9183_7_IFI finngen_R outcome | 9183_7_IFI Inverse va | 89 | -0.06378 | 0.036447 | 0.080129 |
| 9183_7_IFI finngen_R outcome | 9183_7_IFI Simple mc  | 89 | -0.09297 | 0.099155 | 0.351025 |
| 9183_7_IFI finngen_R outcome | 9183_7_IFI Weighted   | 89 | -0.03321 | 0.054104 | 0.540967 |
| 9185_15_T finngen_R outcome  | 9185_15_T MR Egger    | 26 | -0.15708 | 0.136219 | 0.26022  |
| 9185_15_T finngen_R outcome  | 9185_15_T Weighted    | 26 | -0.16969 | 0.11267  | 0.13204  |
| 9185_15_T finngen_R outcome  | 9185_15_T Inverse va  | 26 | -0.07424 | 0.073443 | 0.312058 |
| 9185_15_T finngen_R outcome  | 9185_15_T Simple mc   | 26 | -0.22179 | 0.221969 | 0.327284 |
| 9185_15_T finngen_R outcome  | 9185_15_T Weighted    | 26 | -0.17148 | 0.1164   | 0.153173 |
| 9188_119_ finngen_R outcome  | 9188_119_ Inverse va  | 2  | -0.13721 | 0.562779 | 0.807376 |
| 9191_8_TF finngen_R outcome  | 9191_8_TF MR Egger    | 4  | 1.298048 | 1.118687 | 0.365699 |
| 9191_8_TF finngen_R outcome  | 9191_8_TF Weighted    | 4  | 0.436282 | 0.36723  | 0.234819 |
| 9191_8_TF finngen_R outcome  | 9191_8_TF Inverse va  | 4  | 0.247723 | 0.292922 | 0.397722 |
| 9191_8_TF finngen_R outcome  | 9191_8_TF Simple mc   | 4  | 0.420866 | 0.483328 | 0.447959 |
| 9191_8_TF finngen_R outcome  | 9191_8_TF Weighted    | 4  | 0.468212 | 0.433557 | 0.359252 |
| 9197_4_LC finngen_R outcome  | 9197_4_LC MR Egger    | 5  | -0.45524 | 0.773998 | 0.597767 |
| 9197_4_LC finngen_R outcome  | 9197_4_LC Weighted    | 5  | -0.33408 | 0.251761 | 0.184522 |
| 9197_4_LC finngen_R outcome  | 9197_4_LC Inverse va  | 5  | -0.59353 | 0.239687 | 0.013276 |
| 9197_4_LC finngen_R outcome  | 9197_4_LC Simple mc   | 5  | -1.36148 | 0.580326 | 0.078854 |
| 9197_4_LC finngen_R outcome  | 9197_4_LC Weighted    | 5  | -0.30186 | 0.274184 | 0.332718 |
| 9204_33_F finngen_R outcome  | 9204_33_F MR Egger    | 4  | -0.63709 | 1.001227 | 0.589682 |
| 9204_33_F finngen_R outcome  | 9204_33_F Weighted    | 4  | 0.302948 | 0.306343 | 0.322704 |
| 9204_33_F finngen_R outcome  | 9204_33_F Inverse va  | 4  | 0.383326 | 0.259146 | 0.139089 |
| 9204_33_F finngen_R outcome  | 9204_33_F Simple mc   | 4  | 0.208732 | 0.453183 | 0.676427 |
| 9204_33_F finngen_R outcome  | 9204_33_F Weighted    | 4  | 0.247206 | 0.437715 | 0.611708 |
| 9211_19_S finngen_R outcome  | 9211_19_S MR Egger    | 26 | -0.04505 | 0.141309 | 0.752657 |
| 9211_19_S finngen_R outcome  | 9211_19_S Weighted    | 26 | -0.00568 | 0.106156 | 0.957363 |
| 9211_19_S finngen_R outcome  | 9211_19_S Inverse va  | 26 | 0.146606 | 0.075115 | 0.050969 |
| 9211_19_S finngen_R outcome  | 9211_19_S Simple mc   | 26 | 0.057505 | 0.188884 | 0.763307 |
| 9211_19_S finngen_R outcome  | 9211_19_S Weighted    | 26 | 0.03453  | 0.107942 | 0.751703 |
| 9212_22_C finngen_R outcome  | 9212_22_C MR Egger    | 17 | 0.570338 | 0.449692 | 0.224028 |
| 9212_22_C finngen_R outcome  | 9212_22_C Weighted    | 17 | 0.188618 | 0.197693 | 0.340036 |
| 9212_22_C finngen_R outcome  | 9212_22_C Inverse va  | 17 | 0.109463 | 0.142128 | 0.441198 |
| 9212_22_C finngen_R outcome  | 9212_22_C Simple mc   | 17 | 0.314233 | 0.324335 | 0.347037 |
| 9212_22_C finngen_R outcome  | 9212_22_C Weighted    | 17 | 0.256458 | 0.266425 | 0.350076 |
| 9223_11_M finngen_R outcome  | 9223_11_M Inverse va  | 2  | 0.524865 | 0.444104 | 0.237264 |
| 9233_71_T finngen_R outcome  | 9233_71_T Inverse va  | 2  | -0.49862 | 0.500408 | 0.319047 |
| 9234_8_Tv finngen_R outcome  | 9234_8_Tv MR Egger    | 8  | 0.701745 | 0.718438 | 0.366407 |



|                             |                      |     |          |          |          |
|-----------------------------|----------------------|-----|----------|----------|----------|
| 9234_8_Tv finngen_R outcome | 9234_8_Tv Weighted   | 8   | 0.056446 | 0.244644 | 0.817528 |
| 9234_8_Tv finngen_R outcome | 9234_8_Tv Inverse va | 8   | 0.086899 | 0.195857 | 0.65727  |
| 9234_8_Tv finngen_R outcome | 9234_8_Tv Simple mc  | 8   | -0.07045 | 0.361218 | 0.850902 |
| 9234_8_Tv finngen_R outcome | 9234_8_Tv Weighted   | 8   | -0.04532 | 0.329364 | 0.894439 |
| 9241_40_S finngen_R outcome | 9241_40_S MR Egger   | 7   | 0.45934  | 0.428763 | 0.332992 |
| 9241_40_S finngen_R outcome | 9241_40_S Weighted   | 7   | 0.143534 | 0.219709 | 0.513568 |
| 9241_40_S finngen_R outcome | 9241_40_S Inverse va | 7   | 0.078036 | 0.189726 | 0.680846 |
| 9241_40_S finngen_R outcome | 9241_40_S Simple mc  | 7   | 0.09393  | 0.379916 | 0.812965 |
| 9241_40_S finngen_R outcome | 9241_40_S Weighted   | 7   | 0.162661 | 0.241452 | 0.525602 |
| 9244_27_F finngen_R outcome | 9244_27_F MR Egger   | 11  | 0.098823 | 0.21673  | 0.65921  |
| 9244_27_F finngen_R outcome | 9244_27_F Weighted   | 11  | 0.025716 | 0.140249 | 0.854514 |
| 9244_27_F finngen_R outcome | 9244_27_F Inverse va | 11  | -0.02194 | 0.115444 | 0.849273 |
| 9244_27_F finngen_R outcome | 9244_27_F Simple mc  | 11  | -0.03567 | 0.228734 | 0.879175 |
| 9244_27_F finngen_R outcome | 9244_27_F Weighted   | 11  | 0.024487 | 0.143154 | 0.867592 |
| 9263_57_S finngen_R outcome | 9263_57_S Wald ratio | 1   | -0.17917 | 0.35415  | 0.612913 |
| 9266_1_TF finngen_R outcome | 9266_1_TF MR Egger   | 61  | -0.23177 | 0.088611 | 0.011291 |
| 9266_1_TF finngen_R outcome | 9266_1_TF Weighted   | 61  | -0.1553  | 0.074486 | 0.037075 |
| 9266_1_TF finngen_R outcome | 9266_1_TF Inverse va | 61  | -0.15087 | 0.04996  | 0.00253  |
| 9266_1_TF finngen_R outcome | 9266_1_TF Simple mc  | 61  | -0.14412 | 0.133677 | 0.285303 |
| 9266_1_TF finngen_R outcome | 9266_1_TF Weighted   | 61  | -0.16794 | 0.077199 | 0.033549 |
| 9267_2_Cf finngen_R outcome | 9267_2_Cf MR Egger   | 178 | -0.0344  | 0.02736  | 0.21036  |
| 9267_2_Cf finngen_R outcome | 9267_2_Cf Weighted   | 178 | -0.04029 | 0.031671 | 0.203277 |
| 9267_2_Cf finngen_R outcome | 9267_2_Cf Inverse va | 178 | -0.00081 | 0.017606 | 0.963284 |
| 9267_2_Cf finngen_R outcome | 9267_2_Cf Simple mc  | 178 | 0.125137 | 0.05832  | 0.033258 |
| 9267_2_Cf finngen_R outcome | 9267_2_Cf Weighted   | 178 | -0.02422 | 0.027294 | 0.376111 |
| 9275_2_Cf finngen_R outcome | 9275_2_Cf MR Egger   | 192 | -0.00243 | 0.028622 | 0.932463 |
| 9275_2_Cf finngen_R outcome | 9275_2_Cf Weighted   | 192 | -0.02186 | 0.028511 | 0.44315  |
| 9275_2_Cf finngen_R outcome | 9275_2_Cf Inverse va | 192 | -0.0066  | 0.018177 | 0.7165   |
| 9275_2_Cf finngen_R outcome | 9275_2_Cf Simple mc  | 192 | 0.045977 | 0.056069 | 0.413232 |
| 9275_2_Cf finngen_R outcome | 9275_2_Cf Weighted   | 192 | -0.01196 | 0.027031 | 0.658576 |
| 9278_9_EF finngen_R outcome | 9278_9_EF MR Egger   | 7   | 0.668089 | 1.410856 | 0.655786 |
| 9278_9_EF finngen_R outcome | 9278_9_EF Weighted   | 7   | -0.38335 | 0.32123  | 0.232725 |
| 9278_9_EF finngen_R outcome | 9278_9_EF Inverse va | 7   | -0.60218 | 0.277205 | 0.02983  |
| 9278_9_EF finngen_R outcome | 9278_9_EF Simple mc  | 7   | -0.36493 | 0.493088 | 0.487178 |
| 9278_9_EF finngen_R outcome | 9278_9_EF Weighted   | 7   | -0.32486 | 0.405453 | 0.453557 |
| 9282_12_C finngen_R outcome | 9282_12_C MR Egger   | 73  | -0.05541 | 0.051734 | 0.287781 |
| 9282_12_C finngen_R outcome | 9282_12_C Weighted   | 73  | -0.05983 | 0.043898 | 0.172934 |
| 9282_12_C finngen_R outcome | 9282_12_C Inverse va | 73  | -0.09972 | 0.028561 | 0.00048  |
| 9282_12_C finngen_R outcome | 9282_12_C Simple mc  | 73  | -0.05198 | 0.089618 | 0.56375  |
| 9282_12_C finngen_R outcome | 9282_12_C Weighted   | 73  | -0.02938 | 0.044696 | 0.513084 |
| 9288_7_FK finngen_R outcome | 9288_7_FK MR Egger   | 30  | -0.01078 | 0.122077 | 0.930272 |
| 9288_7_FK finngen_R outcome | 9288_7_FK Weighted   | 30  | 0.048483 | 0.110978 | 0.662203 |
| 9288_7_FK finngen_R outcome | 9288_7_FK Inverse va | 30  | 0.104908 | 0.07362  | 0.154159 |
| 9288_7_FK finngen_R outcome | 9288_7_FK Simple mc  | 30  | 0.177246 | 0.158027 | 0.271224 |
| 9288_7_FK finngen_R outcome | 9288_7_FK Weighted   | 30  | 0.048671 | 0.102661 | 0.638984 |
| 9294_45_M finngen_R outcome | 9294_45_M MR Egger   | 18  | 0.321618 | 0.289223 | 0.282565 |
| 9294_45_M finngen_R outcome | 9294_45_M Weighted   | 18  | 0.122983 | 0.187342 | 0.511527 |
| 9294_45_M finngen_R outcome | 9294_45_M Inverse va | 18  | 0.027174 | 0.130557 | 0.835121 |
| 9294_45_M finngen_R outcome | 9294_45_M Simple mc  | 18  | 0.05039  | 0.265565 | 0.851755 |
| 9294_45_M finngen_R outcome | 9294_45_M Weighted   | 18  | 0.130308 | 0.202917 | 0.529328 |
| 9312_8_Az finngen_R outcome | 9312_8_Az MR Egger   | 16  | 0.19828  | 0.381988 | 0.611817 |
| 9312_8_Az finngen_R outcome | 9312_8_Az Weighted   | 16  | 0.000803 | 0.184827 | 0.996535 |
| 9312_8_Az finngen_R outcome | 9312_8_Az Inverse va | 16  | -0.05102 | 0.141197 | 0.717869 |
| 9312_8_Az finngen_R outcome | 9312_8_Az Simple mc  | 16  | 0.027355 | 0.279566 | 0.923347 |
| 9312_8_Az finngen_R outcome | 9312_8_Az Weighted   | 16  | 0.006077 | 0.231647 | 0.979416 |
| 9313_27_C finngen_R outcome | 9313_27_C MR Egger   | 56  | -0.04898 | 0.147225 | 0.740667 |
| 9313_27_C finngen_R outcome | 9313_27_C Weighted   | 56  | -0.02056 | 0.096236 | 0.830842 |
| 9313_27_C finngen_R outcome | 9313_27_C Inverse va | 56  | -0.05081 | 0.07098  | 0.474067 |

|                              |                       |    |          |          |          |
|------------------------------|-----------------------|----|----------|----------|----------|
| 9313_27_C finngen_R outcome  | 9313_27_C Simple mc   | 56 | 0.102875 | 0.207009 | 0.621199 |
| 9313_27_C finngen_R outcome  | 9313_27_C Weighted    | 56 | -0.0215  | 0.162782 | 0.895403 |
| 9321_400_finngen_R outcome   | 9321_400_MR Egger     | 11 | -0.14423 | 0.533128 | 0.792857 |
| 9321_400_finngen_R outcome   | 9321_400_Weighted     | 11 | 0.071457 | 0.224967 | 0.750764 |
| 9321_400_finngen_R outcome   | 9321_400_Inverse va   | 11 | 0.040235 | 0.163711 | 0.805861 |
| 9321_400_finngen_R outcome   | 9321_400_Simple mc    | 11 | 0.03719  | 0.317338 | 0.909027 |
| 9321_400_finngen_R outcome   | 9321_400_Weighted     | 11 | 0.067727 | 0.238535 | 0.782257 |
| 9326_33_I finngen_R outcome  | 9326_33_I MR Egger    | 80 | 0.045191 | 0.053569 | 0.401478 |
| 9326_33_I finngen_R outcome  | 9326_33_I Weighted    | 80 | 0.00345  | 0.051054 | 0.946131 |
| 9326_33_I finngen_R outcome  | 9326_33_I Inverse va  | 80 | 0.072065 | 0.039012 | 0.064708 |
| 9326_33_I finngen_R outcome  | 9326_33_I Simple mc   | 80 | 0.142207 | 0.111527 | 0.206015 |
| 9326_33_I finngen_R outcome  | 9326_33_I Weighted    | 80 | 0.037518 | 0.044952 | 0.406442 |
| 9337_43_T finngen_R outcome  | 9337_43_T MR Egger    | 20 | 0.012082 | 0.21409  | 0.955619 |
| 9337_43_T finngen_R outcome  | 9337_43_T Weighted    | 20 | 0.05162  | 0.126582 | 0.68342  |
| 9337_43_T finngen_R outcome  | 9337_43_T Inverse va  | 20 | 0.083468 | 0.09627  | 0.385932 |
| 9337_43_T finngen_R outcome  | 9337_43_T Simple mc   | 20 | -0.02277 | 0.190212 | 0.905969 |
| 9337_43_T finngen_R outcome  | 9337_43_T Weighted    | 20 | 0.028231 | 0.13821  | 0.84032  |
| 9339_204_finngen_R outcome   | 9339_204_Wald ratio   | 1  | -0.35327 | 0.786703 | 0.653394 |
| 9341_1_PL finngen_R outcome  | 9341_1_PL MR Egger    | 46 | -0.11295 | 0.123059 | 0.363707 |
| 9341_1_PL finngen_R outcome  | 9341_1_PL Weighted    | 46 | -0.04196 | 0.096274 | 0.662923 |
| 9341_1_PL finngen_R outcome  | 9341_1_PL Inverse va  | 46 | 0.032232 | 0.060688 | 0.595342 |
| 9341_1_PL finngen_R outcome  | 9341_1_PL Simple mc   | 46 | -0.05733 | 0.16522  | 0.730221 |
| 9341_1_PL finngen_R outcome  | 9341_1_PL Weighted    | 46 | -0.07369 | 0.093003 | 0.432319 |
| 9343_16_II finngen_R outcome | 9343_16_II Inverse va | 2  | -0.30021 | 0.328277 | 0.360446 |
| 9348_1_C1 finngen_R outcome  | 9348_1_C1 MR Egger    | 12 | 0.082753 | 0.233289 | 0.730163 |
| 9348_1_C1 finngen_R outcome  | 9348_1_C1 Weighted    | 12 | 0.075956 | 0.199238 | 0.703033 |
| 9348_1_C1 finngen_R outcome  | 9348_1_C1 Inverse va  | 12 | 0.042706 | 0.147983 | 0.772899 |
| 9348_1_C1 finngen_R outcome  | 9348_1_C1 Simple mc   | 12 | -0.22881 | 0.293906 | 0.45268  |
| 9348_1_C1 finngen_R outcome  | 9348_1_C1 Weighted    | 12 | 0.036288 | 0.268968 | 0.895116 |
| 9350_3_FS finngen_R outcome  | 9350_3_FS MR Egger    | 4  | -0.71791 | 1.782855 | 0.726152 |
| 9350_3_FS finngen_R outcome  | 9350_3_FS Weighted    | 4  | 0.278526 | 0.395068 | 0.480806 |
| 9350_3_FS finngen_R outcome  | 9350_3_FS Inverse va  | 4  | 0.312725 | 0.332899 | 0.347525 |
| 9350_3_FS finngen_R outcome  | 9350_3_FS Simple mc   | 4  | 0.305029 | 0.529702 | 0.605074 |
| 9350_3_FS finngen_R outcome  | 9350_3_FS Weighted    | 4  | 0.229065 | 0.450026 | 0.645824 |
| 9357_4_Cf finngen_R outcome  | 9357_4_Cf MR Egger    | 9  | -0.03847 | 0.313789 | 0.905872 |
| 9357_4_Cf finngen_R outcome  | 9357_4_Cf Weighted    | 9  | 0.055832 | 0.18527  | 0.763144 |
| 9357_4_Cf finngen_R outcome  | 9357_4_Cf Inverse va  | 9  | 0.041848 | 0.13807  | 0.761821 |
| 9357_4_Cf finngen_R outcome  | 9357_4_Cf Simple mc   | 9  | 0.219831 | 0.313351 | 0.502855 |
| 9357_4_Cf finngen_R outcome  | 9357_4_Cf Weighted    | 9  | 0.286475 | 0.250026 | 0.285002 |
| 9360_33_E finngen_R outcome  | 9360_33_E MR Egger    | 5  | -0.21087 | 0.810693 | 0.81161  |
| 9360_33_E finngen_R outcome  | 9360_33_E Weighted    | 5  | 0.211953 | 0.382962 | 0.57995  |
| 9360_33_E finngen_R outcome  | 9360_33_E Inverse va  | 5  | 0.390595 | 0.371852 | 0.293532 |
| 9360_33_E finngen_R outcome  | 9360_33_E Simple mc   | 5  | -0.21995 | 0.616938 | 0.739461 |
| 9360_33_E finngen_R outcome  | 9360_33_E Weighted    | 5  | -0.07783 | 0.474811 | 0.877752 |
| 9369_174_finngen_R outcome   | 9369_174_MR Egger     | 18 | 0.109519 | 0.375557 | 0.774327 |
| 9369_174_finngen_R outcome   | 9369_174_Weighted     | 18 | -0.00455 | 0.170513 | 0.978733 |
| 9369_174_finngen_R outcome   | 9369_174_Inverse va   | 18 | 0.025316 | 0.130875 | 0.84662  |
| 9369_174_finngen_R outcome   | 9369_174_Simple mc    | 18 | -0.09239 | 0.281019 | 0.746357 |
| 9369_174_finngen_R outcome   | 9369_174_Weighted     | 18 | 0.016267 | 0.17176  | 0.925655 |
| 9370_69_C finngen_R outcome  | 9370_69_C MR Egger    | 44 | 0.06523  | 0.082206 | 0.431951 |
| 9370_69_C finngen_R outcome  | 9370_69_C Weighted    | 44 | 0.117621 | 0.073358 | 0.108848 |
| 9370_69_C finngen_R outcome  | 9370_69_C Inverse va  | 44 | 0.19274  | 0.051325 | 0.000173 |
| 9370_69_C finngen_R outcome  | 9370_69_C Simple mc   | 44 | 0.187324 | 0.123239 | 0.135829 |
| 9370_69_C finngen_R outcome  | 9370_69_C Weighted    | 44 | 0.119435 | 0.069997 | 0.095171 |
| 9380_2_PL finngen_R outcome  | 9380_2_PL MR Egger    | 4  | -1.24844 | 0.577317 | 0.163081 |
| 9380_2_PL finngen_R outcome  | 9380_2_PL Weighted    | 4  | -0.49405 | 0.327804 | 0.131775 |
| 9380_2_PL finngen_R outcome  | 9380_2_PL Inverse va  | 4  | -0.2285  | 0.306856 | 0.456489 |
| 9380_2_PL finngen_R outcome  | 9380_2_PL Simple mc   | 4  | -0.51927 | 0.448574 | 0.330824 |

|                             |                      |     |          |          |          |
|-----------------------------|----------------------|-----|----------|----------|----------|
| 9380_2_PL finngen_R outcome | 9380_2_PL Weighted   | 4   | -0.50354 | 0.401235 | 0.298352 |
| 9383_24_C finngen_R outcome | 9383_24_C Wald ratio | 1   | -0.36109 | 0.641012 | 0.573222 |
| 9384_17_C finngen_R outcome | 9384_17_C MR Egger   | 5   | -0.42118 | 0.378267 | 0.346701 |
| 9384_17_C finngen_R outcome | 9384_17_C Weighted   | 5   | -0.23791 | 0.226959 | 0.29452  |
| 9384_17_C finngen_R outcome | 9384_17_C Inverse va | 5   | -0.091   | 0.205648 | 0.658131 |
| 9384_17_C finngen_R outcome | 9384_17_C Simple mc  | 5   | -0.27464 | 0.28186  | 0.385046 |
| 9384_17_C finngen_R outcome | 9384_17_C Weighted   | 5   | -0.28517 | 0.261082 | 0.336096 |
| 9385_4_G/ finngen_R outcome | 9385_4_G/ MR Egger   | 91  | -0.00328 | 0.081293 | 0.967919 |
| 9385_4_G/ finngen_R outcome | 9385_4_G/ Weighted   | 91  | -0.04854 | 0.068568 | 0.479013 |
| 9385_4_G/ finngen_R outcome | 9385_4_G/ Inverse va | 91  | #####    | 0.044659 | 0.998769 |
| 9385_4_G/ finngen_R outcome | 9385_4_G/ Simple mc  | 91  | -0.07947 | 0.150462 | 0.598663 |
| 9385_4_G/ finngen_R outcome | 9385_4_G/ Weighted   | 91  | -0.13529 | 0.111967 | 0.230082 |
| 9394_19_C finngen_R outcome | 9394_19_C MR Egger   | 54  | -0.12314 | 0.063249 | 0.056947 |
| 9394_19_C finngen_R outcome | 9394_19_C Weighted   | 54  | -0.07755 | 0.063413 | 0.22134  |
| 9394_19_C finngen_R outcome | 9394_19_C Inverse va | 54  | -0.12239 | 0.040872 | 0.002748 |
| 9394_19_C finngen_R outcome | 9394_19_C Simple mc  | 54  | -0.09691 | 0.095869 | 0.316702 |
| 9394_19_C finngen_R outcome | 9394_19_C Weighted   | 54  | -0.08784 | 0.052762 | 0.101862 |
| 9398_30_C finngen_R outcome | 9398_30_C Wald ratio | 1   | 0.579375 | 0.561594 | 0.302231 |
| 9409_11_T finngen_R outcome | 9409_11_T MR Egger   | 142 | 0.024956 | 0.030554 | 0.415435 |
| 9409_11_T finngen_R outcome | 9409_11_T Weighted   | 142 | 0.009961 | 0.037204 | 0.788902 |
| 9409_11_T finngen_R outcome | 9409_11_T Inverse va | 142 | 0.012538 | 0.02171  | 0.563577 |
| 9409_11_T finngen_R outcome | 9409_11_T Simple mc  | 142 | -0.00796 | 0.074786 | 0.915349 |
| 9409_11_T finngen_R outcome | 9409_11_T Weighted   | 142 | 0.01772  | 0.031505 | 0.574688 |
| 9416_77_C finngen_R outcome | 9416_77_C MR Egger   | 10  | -0.27879 | 0.564604 | 0.634737 |
| 9416_77_C finngen_R outcome | 9416_77_C Weighted   | 10  | -0.31216 | 0.233696 | 0.181625 |
| 9416_77_C finngen_R outcome | 9416_77_C Inverse va | 10  | -0.26601 | 0.179165 | 0.137625 |
| 9416_77_C finngen_R outcome | 9416_77_C Simple mc  | 10  | -0.47613 | 0.390292 | 0.253496 |
| 9416_77_C finngen_R outcome | 9416_77_C Weighted   | 10  | -0.41933 | 0.35273  | 0.264931 |
| 9449_150_ finngen_R outcome | 9449_150_ MR Egger   | 28  | 0.137491 | 0.120653 | 0.264861 |
| 9449_150_ finngen_R outcome | 9449_150_ Weighted   | 28  | 0.153079 | 0.109576 | 0.16241  |
| 9449_150_ finngen_R outcome | 9449_150_ Inverse va | 28  | 0.21098  | 0.079189 | 0.007716 |
| 9449_150_ finngen_R outcome | 9449_150_ Simple mc  | 28  | 0.417716 | 0.220536 | 0.068972 |
| 9449_150_ finngen_R outcome | 9449_150_ Weighted   | 28  | 0.177613 | 0.097656 | 0.080057 |
| 9459_7_FA finngen_R outcome | 9459_7_FA MR Egger   | 23  | -0.03607 | 0.177816 | 0.841219 |
| 9459_7_FA finngen_R outcome | 9459_7_FA Weighted   | 23  | 0.064424 | 0.125368 | 0.607338 |
| 9459_7_FA finngen_R outcome | 9459_7_FA Inverse va | 23  | 0.122332 | 0.096371 | 0.204301 |
| 9459_7_FA finngen_R outcome | 9459_7_FA Simple mc  | 23  | 0.176632 | 0.223124 | 0.437029 |
| 9459_7_FA finngen_R outcome | 9459_7_FA Weighted   | 23  | 0.081359 | 0.131848 | 0.543524 |
| 9525_1_P1 finngen_R outcome | 9525_1_P1 MR Egger   | 4   | -0.81999 | 1.713573 | 0.679482 |
| 9525_1_P1 finngen_R outcome | 9525_1_P1 Weighted   | 4   | -0.63617 | 0.314054 | 0.042799 |
| 9525_1_P1 finngen_R outcome | 9525_1_P1 Inverse va | 4   | -0.63176 | 0.280034 | 0.02407  |
| 9525_1_P1 finngen_R outcome | 9525_1_P1 Simple mc  | 4   | -0.65702 | 0.393561 | 0.193626 |
| 9525_1_P1 finngen_R outcome | 9525_1_P1 Weighted   | 4   | -0.64271 | 0.380237 | 0.189552 |
| 9545_156_ finngen_R outcome | 9545_156_ MR Egger   | 8   | -0.25159 | 0.68366  | 0.725505 |
| 9545_156_ finngen_R outcome | 9545_156_ Weighted   | 8   | -0.21779 | 0.218389 | 0.318639 |
| 9545_156_ finngen_R outcome | 9545_156_ Inverse va | 8   | -0.21807 | 0.266059 | 0.412433 |
| 9545_156_ finngen_R outcome | 9545_156_ Simple mc  | 8   | -0.4271  | 0.424424 | 0.347784 |
| 9545_156_ finngen_R outcome | 9545_156_ Weighted   | 8   | -0.25872 | 0.2156   | 0.269175 |
| 9580_5_LA finngen_R outcome | 9580_5_LA MR Egger   | 71  | 0.07076  | 0.064328 | 0.275161 |
| 9580_5_LA finngen_R outcome | 9580_5_LA Weighted   | 71  | -0.00633 | 0.060713 | 0.91692  |
| 9580_5_LA finngen_R outcome | 9580_5_LA Inverse va | 71  | -0.04377 | 0.041248 | 0.288624 |
| 9580_5_LA finngen_R outcome | 9580_5_LA Simple mc  | 71  | -0.02774 | 0.092999 | 0.76635  |
| 9580_5_LA finngen_R outcome | 9580_5_LA Weighted   | 71  | -0.01761 | 0.050528 | 0.728511 |
| 9713_67_F finngen_R outcome | 9713_67_F MR Egger   | 39  | 0.107462 | 0.092633 | 0.253444 |
| 9713_67_F finngen_R outcome | 9713_67_F Weighted   | 39  | 0.135404 | 0.090265 | 0.133595 |
| 9713_67_F finngen_R outcome | 9713_67_F Inverse va | 39  | 0.121912 | 0.064419 | 0.058428 |
| 9713_67_F finngen_R outcome | 9713_67_F Simple mc  | 39  | 0.099924 | 0.21005  | 0.637001 |
| 9713_67_F finngen_R outcome | 9713_67_F Weighted   | 39  | 0.147228 | 0.086316 | 0.096231 |

|                             |                      |     |          |          |          |
|-----------------------------|----------------------|-----|----------|----------|----------|
| 9747_48_⊥finngen_R outcome  | 9747_48_⊥Inverse va  | 2   | -0.06541 | 0.455894 | 0.885907 |
| 9748_31_⊥finngen_R outcome  | 9748_31_⊥MR Egger    | 115 | 0.007753 | 0.049916 | 0.87684  |
| 9748_31_⊥finngen_R outcome  | 9748_31_⊥Weighted    | 115 | -0.01296 | 0.044319 | 0.769887 |
| 9748_31_⊥finngen_R outcome  | 9748_31_⊥Inverse va  | 115 | 0.015384 | 0.029976 | 0.607811 |
| 9748_31_⊥finngen_R outcome  | 9748_31_⊥Simple mc   | 115 | 0.084452 | 0.086268 | 0.329682 |
| 9748_31_⊥finngen_R outcome  | 9748_31_⊥Weighted    | 115 | 0.005963 | 0.046917 | 0.899092 |
| 9754_33_⊥finngen_R outcome  | 9754_33_⊥MR Egger    | 164 | 0.0754   | 0.035408 | 0.034725 |
| 9754_33_⊥finngen_R outcome  | 9754_33_⊥Weighted    | 164 | 0.050308 | 0.039787 | 0.206079 |
| 9754_33_⊥finngen_R outcome  | 9754_33_⊥Inverse va  | 164 | 0.024697 | 0.022631 | 0.275129 |
| 9754_33_⊥finngen_R outcome  | 9754_33_⊥Simple mc   | 164 | 0.068914 | 0.074099 | 0.353734 |
| 9754_33_⊥finngen_R outcome  | 9754_33_⊥Weighted    | 164 | 0.077229 | 0.033678 | 0.023114 |
| 9759_13_⊥finngen_R outcome  | 9759_13_⊥Wald ratio  | 1   | 0.908494 | 0.640795 | 0.156261 |
| 9772_153_⊥finngen_R outcome | 9772_153_⊥MR Egger   | 7   | -0.92581 | 0.616897 | 0.193716 |
| 9772_153_⊥finngen_R outcome | 9772_153_⊥Weighted   | 7   | -0.05173 | 0.24182  | 0.830613 |
| 9772_153_⊥finngen_R outcome | 9772_153_⊥Inverse va | 7   | -0.09952 | 0.197245 | 0.613891 |
| 9772_153_⊥finngen_R outcome | 9772_153_⊥Simple mc  | 7   | 0.19752  | 0.377728 | 0.619773 |
| 9772_153_⊥finngen_R outcome | 9772_153_⊥Weighted   | 7   | -0.08424 | 0.258    | 0.755129 |
| 9790_28_⊥finngen_R outcome  | 9790_28_⊥MR Egger    | 6   | 0.045506 | 0.326353 | 0.895843 |
| 9790_28_⊥finngen_R outcome  | 9790_28_⊥Weighted    | 6   | 0.061668 | 0.191966 | 0.748025 |
| 9790_28_⊥finngen_R outcome  | 9790_28_⊥Inverse va  | 6   | -0.0808  | 0.16087  | 0.615466 |
| 9790_28_⊥finngen_R outcome  | 9790_28_⊥Simple mc   | 6   | 0.043613 | 0.368984 | 0.910512 |
| 9790_28_⊥finngen_R outcome  | 9790_28_⊥Weighted    | 6   | 0.089146 | 0.201334 | 0.676428 |
| 9796_4_⊥finngen_R outcome   | 9796_4_⊥MR Egger     | 62  | 0.009612 | 0.079618 | 0.90431  |
| 9796_4_⊥finngen_R outcome   | 9796_4_⊥Weighted     | 62  | 0.027249 | 0.070019 | 0.697157 |
| 9796_4_⊥finngen_R outcome   | 9796_4_⊥Inverse va   | 62  | -0.04014 | 0.054927 | 0.464931 |
| 9796_4_⊥finngen_R outcome   | 9796_4_⊥Simple mc    | 62  | -0.00981 | 0.130973 | 0.940515 |
| 9796_4_⊥finngen_R outcome   | 9796_4_⊥Weighted     | 62  | 0.015233 | 0.060726 | 0.802776 |
| 9829_91_⊥finngen_R outcome  | 9829_91_⊥MR Egger    | 5   | 0.465605 | 0.403357 | 0.331973 |
| 9829_91_⊥finngen_R outcome  | 9829_91_⊥Weighted    | 5   | 0.043423 | 0.188431 | 0.817746 |
| 9829_91_⊥finngen_R outcome  | 9829_91_⊥Inverse va  | 5   | -0.03067 | 0.169009 | 0.855983 |
| 9829_91_⊥finngen_R outcome  | 9829_91_⊥Simple mc   | 5   | -0.36422 | 0.317169 | 0.314829 |
| 9829_91_⊥finngen_R outcome  | 9829_91_⊥Weighted    | 5   | 0.122301 | 0.210085 | 0.591699 |
| 9837_60_⊥finngen_R outcome  | 9837_60_⊥MR Egger    | 65  | -0.0395  | 0.07282  | 0.589416 |
| 9837_60_⊥finngen_R outcome  | 9837_60_⊥Weighted    | 65  | -0.07385 | 0.061882 | 0.232691 |
| 9837_60_⊥finngen_R outcome  | 9837_60_⊥Inverse va  | 65  | -0.02448 | 0.042705 | 0.56641  |
| 9837_60_⊥finngen_R outcome  | 9837_60_⊥Simple mc   | 65  | -0.05341 | 0.108662 | 0.62477  |
| 9837_60_⊥finngen_R outcome  | 9837_60_⊥Weighted    | 65  | -0.09257 | 0.068561 | 0.181692 |
| 9848_22_⊥finngen_R outcome  | 9848_22_⊥Wald ratio  | 1   | -0.94505 | 0.413187 | 0.022182 |
| 9869_28_⊥finngen_R outcome  | 9869_28_⊥Wald ratio  | 1   | 0.210164 | 0.54365  | 0.699067 |
| 9883_29_⊥finngen_R outcome  | 9883_29_⊥MR Egger    | 4   | -0.07385 | 0.57084  | 0.9089   |
| 9883_29_⊥finngen_R outcome  | 9883_29_⊥Weighted    | 4   | 0.123719 | 0.299233 | 0.679274 |
| 9883_29_⊥finngen_R outcome  | 9883_29_⊥Inverse va  | 4   | 0.175249 | 0.249689 | 0.48276  |
| 9883_29_⊥finngen_R outcome  | 9883_29_⊥Simple mc   | 4   | -0.01562 | 0.424492 | 0.972961 |
| 9883_29_⊥finngen_R outcome  | 9883_29_⊥Weighted    | 4   | -0.00013 | 0.331929 | 0.999702 |
| 9884_8_⊥finngen_R outcome   | 9884_8_⊥MR Egger     | 63  | 0.033751 | 0.077563 | 0.664989 |
| 9884_8_⊥finngen_R outcome   | 9884_8_⊥Weighted     | 63  | 0.074623 | 0.07867  | 0.342844 |
| 9884_8_⊥finngen_R outcome   | 9884_8_⊥Inverse va   | 63  | 0.009441 | 0.053005 | 0.858635 |
| 9884_8_⊥finngen_R outcome   | 9884_8_⊥Simple mc    | 63  | 0.148015 | 0.181705 | 0.418427 |
| 9884_8_⊥finngen_R outcome   | 9884_8_⊥Weighted     | 63  | 0.060181 | 0.078122 | 0.444021 |
| 9901_28_⊥finngen_R outcome  | 9901_28_⊥MR Egger    | 35  | 0.117459 | 0.172618 | 0.500963 |
| 9901_28_⊥finngen_R outcome  | 9901_28_⊥Weighted    | 35  | 0.017173 | 0.129785 | 0.894735 |
| 9901_28_⊥finngen_R outcome  | 9901_28_⊥Inverse va  | 35  | 0.0712   | 0.098145 | 0.468172 |
| 9901_28_⊥finngen_R outcome  | 9901_28_⊥Simple mc   | 35  | -0.17634 | 0.219403 | 0.427128 |
| 9901_28_⊥finngen_R outcome  | 9901_28_⊥Weighted    | 35  | 0.001167 | 0.168639 | 0.994517 |
| 9906_21_⊥finngen_R outcome  | 9906_21_⊥MR Egger    | 65  | -0.05716 | 0.063369 | 0.370491 |
| 9906_21_⊥finngen_R outcome  | 9906_21_⊥Weighted    | 65  | -0.06844 | 0.064144 | 0.285985 |
| 9906_21_⊥finngen_R outcome  | 9906_21_⊥Inverse va  | 65  | -0.0496  | 0.042022 | 0.237826 |
| 9906_21_⊥finngen_R outcome  | 9906_21_⊥Simple mc   | 65  | 0.017606 | 0.112536 | 0.876175 |

|                             |                      |    |          |          |          |
|-----------------------------|----------------------|----|----------|----------|----------|
| 9906_21_§ finngen_R outcome | 9906_21_§ Weighted   | 65 | -0.04199 | 0.061573 | 0.49773  |
| 9916_146_ finngen_R outcome | 9916_146_ MR Egger   | 6  | 0.514918 | 0.640217 | 0.466313 |
| 9916_146_ finngen_R outcome | 9916_146_ Weighted   | 6  | -0.39401 | 0.334174 | 0.238374 |
| 9916_146_ finngen_R outcome | 9916_146_ Inverse va | 6  | -0.35542 | 0.263311 | 0.177078 |
| 9916_146_ finngen_R outcome | 9916_146_ Simple mc  | 6  | -0.39713 | 0.504892 | 0.467165 |
| 9916_146_ finngen_R outcome | 9916_146_ Weighted   | 6  | -0.40092 | 0.425914 | 0.389766 |
| 9950_229_ finngen_R outcome | 9950_229_ MR Egger   | 6  | 0.681556 | 0.725366 | 0.40062  |
| 9950_229_ finngen_R outcome | 9950_229_ Weighted   | 6  | -0.29192 | 0.22886  | 0.202114 |
| 9950_229_ finngen_R outcome | 9950_229_ Inverse va | 6  | -0.04909 | 0.2744   | 0.858009 |
| 9950_229_ finngen_R outcome | 9950_229_ Simple mc  | 6  | -0.31561 | 0.345832 | 0.403307 |
| 9950_229_ finngen_R outcome | 9950_229_ Weighted   | 6  | -0.38082 | 0.238172 | 0.170729 |
| 9986_14_† finngen_R outcome | 9986_14_† MR Egger   | 38 | -0.01906 | 0.082291 | 0.818134 |
| 9986_14_† finngen_R outcome | 9986_14_† Weighted   | 38 | 0.0348   | 0.075698 | 0.645715 |
| 9986_14_† finngen_R outcome | 9986_14_† Inverse va | 38 | -0.01279 | 0.052337 | 0.806917 |
| 9986_14_† finngen_R outcome | 9986_14_† Simple mc  | 38 | 0.099758 | 0.133673 | 0.460214 |
| 9986_14_† finngen_R outcome | 9986_14_† Weighted   | 38 | 0.014747 | 0.064127 | 0.81938  |
| 9995_6_D† finngen_R outcome | 9995_6_D† Wald ratio | 1  | -0.53022 | 0.595131 | 0.372965 |
