# Supplementary material for: Leveraging pQTL-based Mendelian randomization to identify new treatment prospects for primary biliary cholangitis and primary sclerosing cholangitis
Source: Aging (Albany NY). 2024 May 27;16(10):9228–50. doi: 10.18632/aging.205867 (PMC11164478; doi:10.18632/aging.205867)
Supplement: Supplementary Table 1 [file aging-16-205867-s002.xlsx]

## Sheet: Data
Supplementary Table 1. All the druggable genes, their locations and druggability priority. Additionally, the number of times each gene has overlapped an LD region surrounding a significant GWAS association (P ≤ 5 × 10−8)) is indicated along with the type of molecule that binds to each of the druggable genes.
ensembl_gene_id	druggability_tier	hgnc_names	chr_b37	start_b37	end_b37	strand	description	no_of_gwas_regions	small_mol_druggable	bio_druggable	adme_gene
ENSG00000000938	Tier 1	FGR	1	27938575	27961788	-1	feline Gardner-Rasheed sarcoma viral oncogene homolog [Source:HGNC Symbol;Acc:3697]	0	Y	N	N
ENSG00000001626	Tier 1	CFTR	7	117105838	117356025	1	cystic fibrosis transmembrane conductance regulator (ATP-binding cassette sub-family C, member 7) [Source:HGNC Symbol;Acc:1884]	0	Y	N	Y
ENSG00000001630	Tier 1	CYP51A1	7	91741465	91772266	-1	cytochrome P450, family 51, subfamily A, polypeptide 1 [Source:HGNC Symbol;Acc:2649]	0	Y	N	Y
ENSG00000002549	Tier 1	LAP3	4	17578815	17609595	1	leucine aminopeptidase 3 [Source:HGNC Symbol;Acc:18449]	0	Y	N	N
ENSG00000004468	Tier 1	CD38	4	15779898	15854853	1	CD38 molecule [Source:HGNC Symbol;Acc:1667]	0	N	Y	N
ENSG00000004478	Tier 1	FKBP4	12	2904119	2914576	1	FK506 binding protein 4, 59kDa [Source:HGNC Symbol;Acc:3720]	0	Y	N	N
ENSG00000004660	Tier 1	CAMKK1	17	3763609	3798185	-1	calcium/calmodulin-dependent protein kinase kinase 1, alpha [Source:HGNC Symbol;Acc:1469]	0	Y	N	N
ENSG00000004700	Tier 1	RECQL	12	21621845	21654603	-1	RecQ protein-like (DNA helicase Q1-like) [Source:HGNC Symbol;Acc:9948]	0	Y	N	N
ENSG00000004809	Tier 1	SLC22A16	6	110745890	110797844	-1	solute carrier family 22 (organic cation/carnitine transporter), member 16 [Source:HGNC Symbol;Acc:20302]	0	Y	N	Y
ENSG00000004846	Tier 1	ABCB5	7	20654830	20816658	1	ATP-binding cassette, sub-family B (MDR/TAP), member 5 [Source:HGNC Symbol;Acc:46]	0	Y	N	Y
ENSG00000004948	Tier 1	CALCR	7	93053799	93204042	-1	calcitonin receptor [Source:HGNC Symbol;Acc:1440]	0	Y	Y	N
ENSG00000005381	Tier 1	MPO	17	56347217	56358296	-1	myeloperoxidase [Source:HGNC Symbol;Acc:7218]	1	Y	Y	Y
ENSG00000005421	Tier 1	PON1	7	94926988	95025673	-1	paraoxonase 1 [Source:HGNC Symbol;Acc:9204]	3	N	Y	Y
ENSG00000005471	Tier 1	ABCB4	7	87031013	87109751	-1	ATP-binding cassette, sub-family B (MDR/TAP), member 4 [Source:HGNC Symbol;Acc:45]	0	N	Y	Y
ENSG00000005844	Tier 1	ITGAL	16	30483979	30534506	1	integrin, alpha L (antigen CD11A (p180), lymphocyte function-associated antigen 1; alpha polypeptide) [Source:HGNC Symbol;Acc:6148]	1	Y	Y	N
ENSG00000005961	Tier 1	ITGA2B	17	42449548	42466873	-1	integrin, alpha 2b (platelet glycoprotein IIb of IIb/IIIa complex, antigen CD41) [Source:HGNC Symbol;Acc:6138]	1	Y	Y	N
ENSG00000006071	Tier 1	ABCC8	11	17414432	17498449	-1	ATP-binding cassette, sub-family C (CFTR/MRP), member 8 [Source:HGNC Symbol;Acc:59]	4	Y	Y	Y
ENSG00000006283	Tier 1	CACNA1G	17	48638429	48704835	1	calcium channel, voltage-dependent, T type, alpha 1G subunit [Source:HGNC Symbol;Acc:1394]	1	Y	N	N
ENSG00000006327	Tier 1	TNFRSF12A	16	3068446	3072384	1	tumor necrosis factor receptor superfamily, member 12A [Source:HGNC Symbol;Acc:18152]	0	N	Y	N
ENSG00000006432	Tier 1	MAP3K9	14	71189243	71276251	-1	mitogen-activated protein kinase kinase kinase 9 [Source:HGNC Symbol;Acc:6861]	0	Y	N	N
ENSG00000006638	Tier 1	TBXA2R	19	3594504	3606838	-1	thromboxane A2 receptor [Source:HGNC Symbol;Acc:11608]	0	Y	N	N
ENSG00000007047	Tier 1	MARK4	19	45582546	45808541	1	MAP/microtubule affinity-regulating kinase 4 [Source:HGNC Symbol;Acc:13538]	2	Y	N	N
ENSG00000007171	Tier 1	NOS2	17	26083792	26127525	-1	nitric oxide synthase 2, inducible [Source:HGNC Symbol;Acc:7873]	2	Y	N	Y
ENSG00000007216	Tier 1	SLC13A2	17	26800311	26824799	1	solute carrier family 13 (sodium-dependent dicarboxylate transporter), member 2 [Source:HGNC Symbol;Acc:10917]	0	N	N	Y
ENSG00000007264	Tier 1	MATK	19	3777971	3802127	-1	megakaryocyte-associated tyrosine kinase [Source:HGNC Symbol;Acc:6906]	1	Y	N	N
ENSG00000007312	Tier 1	CD79B	17	62006100	62009714	-1	CD79b molecule, immunoglobulin-associated beta [Source:HGNC Symbol;Acc:1699]	4	N	Y	N
ENSG00000007314	Tier 1	SCN4A	17	62015914	62050278	-1	sodium channel, voltage-gated, type IV, alpha subunit [Source:HGNC Symbol;Acc:10591]	3	Y	N	N
ENSG00000007402	Tier 1	CACNA2D2	3	50400233	50541675	-1	calcium channel, voltage-dependent, alpha 2/delta subunit 2 [Source:HGNC Symbol;Acc:1400]	1	Y	N	N
ENSG00000007908	Tier 1	SELE	1	169691781	169733846	-1	selectin E [Source:HGNC Symbol;Acc:10718]	1	Y	Y	N
ENSG00000007933	Tier 1	FMO3	1	171060018	171086959	1	flavin containing monooxygenase 3 [Source:HGNC Symbol;Acc:3771]	1	N	N	Y
ENSG00000008018	Tier 1	PSMB1	6	170844205	170862429	-1	proteasome (prosome, macropain) subunit, beta type, 1 [Source:HGNC Symbol;Acc:9537]	0	Y	N	N
ENSG00000008086	Tier 1	CDKL5	X	18443703	18671749	1	cyclin-dependent kinase-like 5 [Source:HGNC Symbol;Acc:11411]	0	Y	N	N
ENSG00000008394	Tier 1	MGST1	12	16500076	16762193	1	microsomal glutathione S-transferase 1 [Source:HGNC Symbol;Acc:7061]	0	N	N	Y
ENSG00000010310	Tier 1	GIPR	19	46171502	46186982	1	gastric inhibitory polypeptide receptor [Source:HGNC Symbol;Acc:4271]	7	Y	Y	N
ENSG00000010322	Tier 1	NISCH	3	52489134	52527087	1	nischarin [Source:HGNC Symbol;Acc:18006]	10	Y	N	N
ENSG00000010610	Tier 1	CD4	12	6896024	6929974	1	CD4 molecule [Source:HGNC Symbol;Acc:1678]	0	N	Y	N
ENSG00000010671	Tier 1	BTK	X	100604435	100641183	-1	Bruton agammaglobulinemia tyrosine kinase [Source:HGNC Symbol;Acc:1133]	0	Y	N	N
ENSG00000010810	Tier 1	FYN	6	111981535	112194655	-1	FYN oncogene related to SRC, FGR, YES [Source:HGNC Symbol;Acc:4037]	1	Y	N	N
ENSG00000010932	Tier 1	FMO1	1	171217638	171255117	1	flavin containing monooxygenase 1 [Source:HGNC Symbol;Acc:3769]	0	N	N	Y
ENSG00000011566	Tier 1	MAP4K3	2	39476407	39664453	-1	mitogen-activated protein kinase kinase kinase kinase 3 [Source:HGNC Symbol;Acc:6865]	0	Y	N	N
ENSG00000011677	Tier 1	GABRA3	X	151334706	151619830	-1	gamma-aminobutyric acid (GABA) A receptor, alpha 3 [Source:HGNC Symbol;Acc:4077]	0	Y	Y	N
ENSG00000012124	Tier 1	CD22	19	35810164	35838258	1	CD22 molecule [Source:HGNC Symbol;Acc:1643]	0	N	Y	N
ENSG00000012504	Tier 1	NR1H4	12	100867486	100958191	1	nuclear receptor subfamily 1, group H, member 4 [Source:HGNC Symbol;Acc:7967]	0	Y	N	N
ENSG00000012779	Tier 1	ALOX5	10	45869661	45941561	1	arachidonate 5-lipoxygenase [Source:HGNC Symbol;Acc:435]	6	Y	N	N
ENSG00000012983	Tier 1	MAP4K5	14	50885219	51027844	-1	mitogen-activated protein kinase kinase kinase kinase 5 [Source:HGNC Symbol;Acc:6867]	0	Y	N	N
ENSG00000013441	Tier 1	CLK1	2	201717732	201729422	-1	CDC-like kinase 1 [Source:HGNC Symbol;Acc:2068]	0	Y	N	N
ENSG00000013725	Tier 1	CD6	11	60739115	60787849	1	CD6 molecule [Source:HGNC Symbol;Acc:1691]	3	N	Y	N
ENSG00000015413	Tier 1	DPEP1	16	89679716	89704839	1	dipeptidase 1 (renal) [Source:HGNC Symbol;Acc:3002]	20	Y	Y	Y
ENSG00000015520	Tier 1	NPC1L1	7	44552134	44580914	-1	NPC1-like 1 [Source:HGNC Symbol;Acc:7898]	4	Y	N	N
ENSG00000016490	Tier 1	CLCA1	1	86934051	86965972	1	chloride channel accessory 1 [Source:HGNC Symbol;Acc:2015]	0	Y	Y	N
ENSG00000016602	Tier 1	CLCA4	1	87012761	87046437	1	chloride channel accessory 4 [Source:HGNC Symbol;Acc:2018]	0	Y	Y	N
ENSG00000017427	Tier 1	IGF1	12	102789645	102874423	-1	insulin-like growth factor 1 (somatomedin C) [Source:HGNC Symbol;Acc:5464]	8	N	Y	N
ENSG00000018625	Tier 1	ATP1A2	1	160085549	160113381	1	ATPase, Na+/K+ transporting, alpha 2 polypeptide [Source:HGNC Symbol;Acc:800]	0	Y	N	N
ENSG00000019186	Tier 1	CYP24A1	20	52769988	52790512	-1	cytochrome P450, family 24, subfamily A, polypeptide 1 [Source:HGNC Symbol;Acc:2602]	2	Y	N	Y
ENSG00000019582	Tier 1	CD74	5	149781200	149792492	-1	CD74 molecule, major histocompatibility complex, class II invariant chain [Source:HGNC Symbol;Acc:1697]	0	N	Y	N
ENSG00000019991	Tier 1	HGF	7	81328322	81399754	-1	hepatocyte growth factor (hepapoietin A; scatter factor) [Source:HGNC Symbol;Acc:4893]	0	Y	Y	N
ENSG00000021461	Tier 1	CYP3A43	7	99425636	99463718	1	cytochrome P450, family 3, subfamily A, polypeptide 43 [Source:HGNC Symbol;Acc:17450]	2	Y	N	Y
ENSG00000021826	Tier 1	CPS1	2	211342406	211543831	1	carbamoyl-phosphate synthase 1, mitochondrial [Source:HGNC Symbol;Acc:2323]	17	Y	N	N
ENSG00000022355	Tier 1	GABRA1	5	161274197	161326975	1	gamma-aminobutyric acid (GABA) A receptor, alpha 1 [Source:HGNC Symbol;Acc:4075]	0	Y	Y	N
ENSG00000023445	Tier 1	BIRC3	11	102188215	102210134	1	baculoviral IAP repeat containing 3 [Source:HGNC Symbol;Acc:591]	0	Y	N	N
ENSG00000023839	Tier 1	ABCC2	10	101542489	101611949	1	ATP-binding cassette, sub-family C (CFTR/MRP), member 2 [Source:HGNC Symbol;Acc:53]	0	Y	Y	Y
ENSG00000026025	Tier 1	VIM	10	17270258	17279592	1	vimentin [Source:HGNC Symbol;Acc:12692]	1	N	Y	N
ENSG00000026508	Tier 1	CD44	11	35160417	35253949	1	CD44 molecule (Indian blood group) [Source:HGNC Symbol;Acc:1681]	1	N	Y	N
ENSG00000026751	Tier 1	SLAMF7	1	160709037	160724611	1	SLAM family member 7 [Source:HGNC Symbol;Acc:21394]	0	N	Y	N
ENSG00000027075	Tier 1	PRKCH	14	61654277	62017694	1	protein kinase C, eta [Source:HGNC Symbol;Acc:9403]	3	Y	N	N
ENSG00000027697	Tier 1	IFNGR1	6	137518621	137540586	-1	interferon gamma receptor 1 [Source:HGNC Symbol;Acc:5439]	0	N	Y	N
ENSG00000028116	Tier 1	VRK2	2	58134786	58387055	1	vaccinia related kinase 2 [Source:HGNC Symbol;Acc:12719]	2	Y	N	N
ENSG00000030304	Tier 1	MUSK	9	113431051	113563859	1	muscle, skeletal, receptor tyrosine kinase [Source:HGNC Symbol;Acc:7525]	0	Y	Y	N
ENSG00000034152	Tier 1	MAP2K3	17	21187984	21218552	1	mitogen-activated protein kinase kinase 3 [Source:HGNC Symbol;Acc:6843]	0	Y	N	N
ENSG00000035664	Tier 1	DAPK2	15	64199235	64364232	-1	death-associated protein kinase 2 [Source:HGNC Symbol;Acc:2675]	0	Y	N	N
ENSG00000036530	Tier 1	CYP46A1	14	100150641	100193638	1	cytochrome P450, family 46, subfamily A, polypeptide 1 [Source:HGNC Symbol;Acc:2641]	1	Y	N	Y
ENSG00000036828	Tier 1	CASR	3	121902530	122005342	1	calcium-sensing receptor [Source:HGNC Symbol;Acc:1514]	4	Y	Y	N
ENSG00000037280	Tier 1	FLT4	5	180028506	180076624	-1	fms-related tyrosine kinase 4 [Source:HGNC Symbol;Acc:3767]	0	Y	Y	N
ENSG00000041982	Tier 1	TNC	9	117782806	117880536	-1	tenascin C [Source:HGNC Symbol;Acc:5318]	0	N	Y	N
ENSG00000042088	Tier 1	TDP1	14	90421283	90511106	1	tyrosyl-DNA phosphodiesterase 1 [Source:HGNC Symbol;Acc:18884]	0	Y	N	N
ENSG00000043591	Tier 1	ADRB1	10	115803806	115806667	1	adrenoceptor beta 1 [Source:HGNC Symbol;Acc:285]	1	Y	Y	N
ENSG00000044524	Tier 1	EPHA3	3	89156674	89531284	1	EPH receptor A3 [Source:HGNC Symbol;Acc:3387]	2	Y	Y	N
ENSG00000047936	Tier 1	ROS1	6	117609463	117747018	-1	c-ros oncogene 1 , receptor tyrosine kinase [Source:HGNC Symbol;Acc:10261]	1	Y	N	N
ENSG00000048052	Tier 1	HDAC9	7	18126572	19042039	1	histone deacetylase 9 [Source:HGNC Symbol;Acc:14065]	6	Y	N	N
ENSG00000049249	Tier 1	TNFRSF9	1	7979907	8000926	-1	tumor necrosis factor receptor superfamily, member 9 [Source:HGNC Symbol;Acc:11924]	2	N	Y	N
ENSG00000049319	Tier 1	SRD5A2	2	31747550	31806136	-1	steroid-5-alpha-reductase, alpha polypeptide 2 (3-oxo-5 alpha-steroid delta 4-dehydrogenase alpha 2) [Source:HGNC Symbol;Acc:11285]	4	Y	N	N
ENSG00000050555	Tier 1	LAMC3	9	133884469	133969860	1	laminin, gamma 3 [Source:HGNC Symbol;Acc:6494]	0	N	Y	N
ENSG00000050628	Tier 1	PTGER3	1	71318036	71513491	-1	prostaglandin E receptor 3 (subtype EP3) [Source:HGNC Symbol;Acc:9595]	0	Y	N	N
ENSG00000050748	Tier 1	MAPK9	5	179660143	179719099	-1	mitogen-activated protein kinase 9 [Source:HGNC Symbol;Acc:6886]	1	Y	N	N
ENSG00000051382	Tier 1	PIK3CB	3	138372860	138553780	-1	phosphatidylinositol-4,5-bisphosphate 3-kinase, catalytic subunit beta [Source:HGNC Symbol;Acc:8976]	0	Y	N	N
ENSG00000053747	Tier 1	LAMA3	18	21269407	21535030	1	laminin, alpha 3 [Source:HGNC Symbol;Acc:6483]	0	N	Y	N
ENSG00000053918	Tier 1	KCNQ1	11	2465914	2870339	1	potassium voltage-gated channel, KQT-like subfamily, member 1 [Source:HGNC Symbol;Acc:6294]	21	Y	N	N
ENSG00000055118	Tier 1	KCNH2	7	150642049	150675403	-1	potassium voltage-gated channel, subfamily H (eag-related), member 2 [Source:HGNC Symbol;Acc:6251]	6	Y	N	N
ENSG00000057593	Tier 1	F7	13	113760105	113774995	1	coagulation factor VII (serum prothrombin conversion accelerator) [Source:HGNC Symbol;Acc:3544]	6	Y	Y	N
ENSG00000058085	Tier 1	LAMC2	1	183155373	183214035	1	laminin, gamma 2 [Source:HGNC Symbol;Acc:6493]	0	N	Y	N
ENSG00000058404	Tier 1	CAMK2B	7	44256749	44374176	-1	calcium/calmodulin-dependent protein kinase II beta [Source:HGNC Symbol;Acc:1461]	15	Y	N	N
ENSG00000058729	Tier 1	RIOK2	5	96496571	96518964	-1	RIO kinase 2 [Source:HGNC Symbol;Acc:18999]	0	Y	N	N
ENSG00000059377	Tier 1	TBXAS1	7	139476850	139720125	1	thromboxane A synthase 1 (platelet) [Source:HGNC Symbol;Acc:11609]	0	Y	N	N
ENSG00000061273	Tier 1	HDAC7	12	48176505	48226915	-1	histone deacetylase 7 [Source:HGNC Symbol;Acc:14067]	1	Y	N	N
ENSG00000061918	Tier 1	GUCY1B3	4	156680144	156728743	1	guanylate cyclase 1, soluble, beta 3 [Source:HGNC Symbol;Acc:4687]	0	Y	N	N
ENSG00000061938	Tier 1	TNK2	3	195590235	195638816	-1	tyrosine kinase, non-receptor, 2 [Source:HGNC Symbol;Acc:19297]	0	Y	N	N
ENSG00000062038	Tier 1	CDH3	16	68670092	68756519	1	cadherin 3, type 1, P-cadherin (placental) [Source:HGNC Symbol;Acc:1762]	4	N	Y	N
ENSG00000062524	Tier 1	LTK	15	41795836	41806085	-1	leukocyte receptor tyrosine kinase [Source:HGNC Symbol;Acc:6721]	0	Y	N	N
ENSG00000062822	Tier 1	POLD1	19	50887461	50921273	1	polymerase (DNA directed), delta 1, catalytic subunit [Source:HGNC Symbol;Acc:9175]	0	Y	N	N
ENSG00000063854	Tier 1	HAGH	16	1845621	1877195	-1	hydroxyacylglutathione hydrolase [Source:HGNC Symbol;Acc:4805]	2	N	N	Y
ENSG00000064012	Tier 1	CASP8	2	202098166	202152434	1	caspase 8, apoptosis-related cysteine peptidase [Source:HGNC Symbol;Acc:1509]	5	Y	N	N
ENSG00000064300	Tier 1	NGFR	17	47572655	47592379	1	nerve growth factor receptor [Source:HGNC Symbol;Acc:7809]	0	Y	Y	N
ENSG00000064393	Tier 1	HIPK2	7	139246316	139477577	-1	homeodomain interacting protein kinase 2 [Source:HGNC Symbol;Acc:14402]	0	Y	N	N
ENSG00000064547	Tier 1	LPAR2	19	19734477	19739739	-1	lysophosphatidic acid receptor 2 [Source:HGNC Symbol;Acc:3168]	16	Y	N	N
ENSG00000064989	Tier 1	CALCRL	2	188207856	188313187	-1	calcitonin receptor-like [Source:HGNC Symbol;Acc:16709]	0	Y	Y	N
ENSG00000065243	Tier 1	PKN2	1	89149905	89301938	1	protein kinase N2 [Source:HGNC Symbol;Acc:9406]	2	Y	N	N
ENSG00000065325	Tier 1	GLP2R	17	9725523	9795419	1	glucagon-like peptide 2 receptor [Source:HGNC Symbol;Acc:4325]	0	N	Y	N
ENSG00000065361	Tier 1	ERBB3	12	56473641	56497289	1	v-erb-b2 avian erythroblastic leukemia viral oncogene homolog 3 [Source:HGNC Symbol;Acc:3431]	17	Y	Y	N
ENSG00000065534	Tier 1	MYLK	3	123328896	123603178	-1	myosin light chain kinase [Source:HGNC Symbol;Acc:7590]	0	Y	N	N
ENSG00000065559	Tier 1	MAP2K4	17	11924141	12047147	1	mitogen-activated protein kinase kinase 4 [Source:HGNC Symbol;Acc:6844]	0	Y	N	N
ENSG00000065613	Tier 1	SLK	10	105726959	105788991	1	STE20-like kinase [Source:HGNC Symbol;Acc:11088]	1	Y	N	N
ENSG00000065621	Tier 1	GSTO2	10	106028631	106064703	1	glutathione S-transferase omega 2 [Source:HGNC Symbol;Acc:23064]	1	N	N	Y
ENSG00000065675	Tier 1	PRKCQ	10	6469105	6622263	-1	protein kinase C, theta [Source:HGNC Symbol;Acc:9410]	1	Y	N	N
ENSG00000065883	Tier 1	CDK13	7	39989636	40136733	1	cyclin-dependent kinase 13 [Source:HGNC Symbol;Acc:1733]	0	Y	N	N
ENSG00000065989	Tier 1	PDE4A	19	10527449	10580305	1	phosphodiesterase 4A, cAMP-specific [Source:HGNC Symbol;Acc:8780]	5	Y	N	N
ENSG00000066056	Tier 1	TIE1	1	43766664	43788779	1	tyrosine kinase with immunoglobulin-like and EGF-like domains 1 [Source:HGNC Symbol;Acc:11809]	0	Y	Y	N
ENSG00000066230	Tier 1	SLC9A3	5	473425	524447	-1	solute carrier family 9, subfamily A (NHE3, cation proton antiporter 3), member 3 [Source:HGNC Symbol;Acc:11073]	4	Y	N	N
ENSG00000066405	Tier 1	CLDN18	3	137717577	137752494	1	claudin 18 [Source:HGNC Symbol;Acc:2039]	0	N	Y	N
ENSG00000066468	Tier 1	FGFR2	10	123237848	123357972	-1	fibroblast growth factor receptor 2 [Source:HGNC Symbol;Acc:3689]	10	Y	Y	N
ENSG00000067182	Tier 1	TNFRSF1A	12	6437923	6451280	-1	tumor necrosis factor receptor superfamily, member 1A [Source:HGNC Symbol;Acc:11916]	3	Y	Y	N
ENSG00000067225	Tier 1	PKM	15	72491370	72524164	-1	pyruvate kinase, muscle [Source:HGNC Symbol;Acc:9021]	1	Y	N	N
ENSG00000067606	Tier 1	PRKCZ	1	1981909	2116834	1	protein kinase C, zeta [Source:HGNC Symbol;Acc:9412]	1	Y	N	N
ENSG00000067900	Tier 1	ROCK1	18	18526867	18691812	-1	Rho-associated, coiled-coil containing protein kinase 1 [Source:HGNC Symbol;Acc:10251]	0	Y	N	N
ENSG00000068024	Tier 1	HDAC4	2	239969864	240323348	-1	histone deacetylase 4 [Source:HGNC Symbol;Acc:14063]	0	Y	N	N
ENSG00000068078	Tier 1	FGFR3	4	1795034	1810599	1	fibroblast growth factor receptor 3 [Source:HGNC Symbol;Acc:3690]	0	Y	Y	N
ENSG00000069431	Tier 1	ABCC9	12	21950335	22094336	-1	ATP-binding cassette, sub-family C (CFTR/MRP), member 9 [Source:HGNC Symbol;Acc:60]	1	Y	N	Y
ENSG00000069535	Tier 1	MAOB	X	43625858	43741693	-1	monoamine oxidase B [Source:HGNC Symbol;Acc:6834]	0	Y	N	Y
ENSG00000069696	Tier 1	DRD4	11	637293	640706	1	dopamine receptor D4 [Source:HGNC Symbol;Acc:3025]	0	Y	N	N
ENSG00000069764	Tier 1	PLA2G10	16	14766405	14788526	-1	phospholipase A2, group X [Source:HGNC Symbol;Acc:9029]	0	Y	Y	N
ENSG00000070019	Tier 1	GUCY2C	12	14765576	14849519	-1	guanylate cyclase 2C (heat stable enterotoxin receptor) [Source:HGNC Symbol;Acc:4688]	0	Y	Y	N
ENSG00000070748	Tier 1	CHAT	10	50817141	50901925	1	choline O-acetyltransferase [Source:HGNC Symbol;Acc:1912]	0	Y	N	N
ENSG00000070808	Tier 1	CAMK2A	5	149599054	149669854	-1	calcium/calmodulin-dependent protein kinase II alpha [Source:HGNC Symbol;Acc:1460]	0	Y	N	N
ENSG00000070886	Tier 1	EPHA8	1	22890057	22930087	1	EPH receptor A8 [Source:HGNC Symbol;Acc:3391]	0	Y	N	N
ENSG00000070915	Tier 1	SLC12A3	16	56899119	56949762	1	solute carrier family 12 (sodium/chloride transporter), member 3 [Source:HGNC Symbol;Acc:10912]	0	Y	N	N
ENSG00000071054	Tier 1	MAP4K4	2	102313312	102511149	1	mitogen-activated protein kinase kinase kinase kinase 4 [Source:HGNC Symbol;Acc:6866]	0	Y	N	N
ENSG00000071242	Tier 1	RPS6KA2	6	166822852	167319939	-1	ribosomal protein S6 kinase, 90kDa, polypeptide 2 [Source:HGNC Symbol;Acc:10431]	0	Y	N	N
ENSG00000072062	Tier 1	PRKACA	19	14202500	14228896	-1	protein kinase, cAMP-dependent, catalytic, alpha [Source:HGNC Symbol;Acc:9380]	0	Y	N	N
ENSG00000072133	Tier 1	RPS6KA6	X	83318984	83442933	-1	ribosomal protein S6 kinase, 90kDa, polypeptide 6 [Source:HGNC Symbol;Acc:10435]	0	Y	N	N
ENSG00000072210	Tier 1	ALDH3A2	17	19551449	19580911	1	aldehyde dehydrogenase 3 family, member A2 [Source:HGNC Symbol;Acc:403]	0	N	N	Y
ENSG00000072274	Tier 1	TFRC	3	195754054	195809060	-1	transferrin receptor [Source:HGNC Symbol;Acc:11763]	4	N	Y	N
ENSG00000072506	Tier 1	HSD17B10	X	53458206	53461320	-1	hydroxysteroid (17-beta) dehydrogenase 10 [Source:HGNC Symbol;Acc:4800]	0	Y	N	N
ENSG00000072518	Tier 1	MARK2	11	63606400	63678491	1	MAP/microtubule affinity-regulating kinase 2 [Source:HGNC Symbol;Acc:3332]	0	Y	N	N
ENSG00000072694	Tier 1	FCGR2B	1	161551101	161648444	1	Fc fragment of IgG, low affinity IIb, receptor (CD32) [Source:HGNC Symbol;Acc:3618]	2	N	Y	N
ENSG00000072786	Tier 1	STK10	5	171469077	171615390	-1	serine/threonine kinase 10 [Source:HGNC Symbol;Acc:11388]	0	Y	N	N
ENSG00000073417	Tier 1	PDE8A	15	85523671	85682376	1	phosphodiesterase 8A [Source:HGNC Symbol;Acc:8793]	0	Y	N	N
ENSG00000073734	Tier 1	ABCB11	2	169779448	169887832	-1	ATP-binding cassette, sub-family B (MDR/TAP), member 11 [Source:HGNC Symbol;Acc:42]	18	N	N	Y
ENSG00000073737	Tier 1	DHRS9	2	169921299	169952677	1	dehydrogenase/reductase (SDR family) member 9 [Source:HGNC Symbol;Acc:16888]	0	N	N	Y
ENSG00000073756	Tier 1	PTGS2	1	186640923	186649559	-1	prostaglandin-endoperoxide synthase 2 (prostaglandin G/H synthase and cyclooxygenase) [Source:HGNC Symbol;Acc:9605]	0	Y	N	N
ENSG00000073803	Tier 1	MAP3K13	3	185000729	185206885	1	mitogen-activated protein kinase kinase kinase 13 [Source:HGNC Symbol;Acc:6852]	0	Y	N	N
ENSG00000074319	Tier 1	TSG101	11	18489883	18548779	-1	tumor susceptibility 101 [Source:HGNC Symbol;Acc:15971]	0	N	Y	N
ENSG00000074410	Tier 1	CA12	15	63613577	63674360	-1	carbonic anhydrase XII [Source:HGNC Symbol;Acc:1371]	0	Y	N	N
ENSG00000074590	Tier 1	NUAK1	12	106457118	106533811	-1	NUAK family, SNF1-like kinase, 1 [Source:HGNC Symbol;Acc:14311]	0	Y	N	N
ENSG00000074803	Tier 1	SLC12A1	15	48483861	48596275	1	solute carrier family 12 (sodium/potassium/chloride transporter), member 1 [Source:HGNC Symbol;Acc:10910]	1	Y	N	N
ENSG00000074966	Tier 1	TXK	4	48068410	48136273	-1	TXK tyrosine kinase [Source:HGNC Symbol;Acc:12434]	0	Y	N	N
ENSG00000075043	Tier 1	KCNQ2	20	62037542	62103993	-1	potassium voltage-gated channel, KQT-like subfamily, member 2 [Source:HGNC Symbol;Acc:6296]	0	Y	N	N
ENSG00000075073	Tier 1	TACR2	10	71163659	71176623	-1	tachykinin receptor 2 [Source:HGNC Symbol;Acc:11527]	0	Y	Y	N
ENSG00000075388	Tier 1	FGF4	11	69587797	69590171	-1	fibroblast growth factor 4 [Source:HGNC Symbol;Acc:3682]	0	Y	Y	N
ENSG00000075413	Tier 1	MARK3	14	103851729	103970168	1	MAP/microtubule affinity-regulating kinase 3 [Source:HGNC Symbol;Acc:6897]	2	Y	N	N
ENSG00000075651	Tier 1	PLD1	3	171318195	171528740	-1	phospholipase D1, phosphatidylcholine-specific [Source:HGNC Symbol;Acc:9067]	0	Y	N	N
ENSG00000076258	Tier 1	FMO4	1	171283347	171311223	1	flavin containing monooxygenase 4 [Source:HGNC Symbol;Acc:3772]	0	N	N	Y
ENSG00000076662	Tier 1	ICAM3	19	10444452	10450499	-1	intercellular adhesion molecule 3 [Source:HGNC Symbol;Acc:5346]	4	N	Y	N
ENSG00000076706	Tier 1	MCAM	11	119179241	119192231	-1	melanoma cell adhesion molecule [Source:HGNC Symbol;Acc:6934]	1	N	Y	N
ENSG00000076984	Tier 1	MAP2K7	19	7968728	7979363	1	mitogen-activated protein kinase kinase 7 [Source:HGNC Symbol;Acc:6847]	0	Y	N	N
ENSG00000077092	Tier 1	RARB	3	25215823	25639423	1	retinoic acid receptor, beta [Source:HGNC Symbol;Acc:9865]	2	Y	N	N
ENSG00000077097	Tier 1	TOP2B	3	25639475	25706398	-1	topoisomerase (DNA) II beta 180kDa [Source:HGNC Symbol;Acc:11990]	0	Y	N	N
ENSG00000077238	Tier 1	IL4R	16	27324989	27376099	1	interleukin 4 receptor [Source:HGNC Symbol;Acc:6015]	0	N	Y	N
ENSG00000077264	Tier 1	PAK3	X	110187513	110470589	1	p21 protein (Cdc42/Rac)-activated kinase 3 [Source:HGNC Symbol;Acc:8592]	0	Y	N	N
ENSG00000077498	Tier 1	TYR	11	88910620	89028927	1	tyrosinase [Source:HGNC Symbol;Acc:12442]	11	Y	N	N
ENSG00000077782	Tier 1	FGFR1	8	38268656	38326352	-1	fibroblast growth factor receptor 1 [Source:HGNC Symbol;Acc:3688]	1	Y	Y	N
ENSG00000078098	Tier 1	FAP	2	163027194	163101661	-1	fibroblast activation protein, alpha [Source:HGNC Symbol;Acc:3590]	0	Y	Y	N
ENSG00000079277	Tier 1	MKNK1	1	47023090	47082515	-1	MAP kinase interacting serine/threonine kinase 1 [Source:HGNC Symbol;Acc:7110]	0	Y	N	N
ENSG00000079459	Tier 1	FDFT1	8	11653082	11696818	1	farnesyl-diphosphate farnesyltransferase 1 [Source:HGNC Symbol;Acc:3629]	0	Y	N	N
ENSG00000079999	Tier 1	KEAP1	19	10596796	10614417	-1	kelch-like ECH-associated protein 1 [Source:HGNC Symbol;Acc:23177]	3	Y	N	N
ENSG00000080224	Tier 1	EPHA6	3	96533425	97471304	1	EPH receptor A6 [Source:HGNC Symbol;Acc:19296]	0	Y	N	N
ENSG00000080293	Tier 1	SCTR	2	120197419	120282070	-1	secretin receptor [Source:HGNC Symbol;Acc:10608]	0	N	Y	N
ENSG00000080644	Tier 1	CHRNA3	15	78885394	78913637	-1	cholinergic receptor, nicotinic, alpha 3 (neuronal) [Source:HGNC Symbol;Acc:1957]	28	Y	N	N
ENSG00000080815	Tier 1	PSEN1	14	73603126	73690399	1	presenilin 1 [Source:HGNC Symbol;Acc:9508]	0	Y	N	N
ENSG00000080824	Tier 1	HSP90AA1	14	102547075	102606036	-1	heat shock protein 90kDa alpha (cytosolic), class A member 1 [Source:HGNC Symbol;Acc:5253]	0	Y	N	N
ENSG00000081051	Tier 1	AFP	4	74296855	74321891	1	alpha-fetoprotein [Source:HGNC Symbol;Acc:317]	1	N	Y	N
ENSG00000081237	Tier 1	PTPRC	1	198607801	198726545	1	protein tyrosine phosphatase, receptor type, C [Source:HGNC Symbol;Acc:9666]	1	Y	Y	N
ENSG00000081248	Tier 1	CACNA1S	1	201008642	201081694	-1	calcium channel, voltage-dependent, L type, alpha 1S subunit [Source:HGNC Symbol;Acc:1397]	7	Y	N	N
ENSG00000081320	Tier 1	STK17B	2	196998290	197041227	-1	serine/threonine kinase 17b [Source:HGNC Symbol;Acc:11396]	0	Y	N	N
ENSG00000081800	Tier 1	SLC13A1	7	122753585	122840040	-1	solute carrier family 13 (sodium/sulfate symporter), member 1 [Source:HGNC Symbol;Acc:10916]	0	N	N	Y
ENSG00000082175	Tier 1	PGR	11	100900355	101001255	-1	progesterone receptor [Source:HGNC Symbol;Acc:8910]	0	Y	N	N
ENSG00000082482	Tier 1	KCNK2	1	215179118	215410436	1	potassium channel, subfamily K, member 2 [Source:HGNC Symbol;Acc:6277]	0	Y	N	N
ENSG00000082556	Tier 1	OPRK1	8	54138284	54164257	-1	opioid receptor, kappa 1 [Source:HGNC Symbol;Acc:8154]	0	Y	N	N
ENSG00000082701	Tier 1	GSK3B	3	119540170	119813264	-1	glycogen synthase kinase 3 beta [Source:HGNC Symbol;Acc:4617]	1	Y	N	N
ENSG00000082781	Tier 1	ITGB5	3	124480795	124620265	-1	integrin, beta 5 [Source:HGNC Symbol;Acc:6160]	0	Y	Y	N
ENSG00000083290	Tier 1	ULK2	17	19674142	19771249	-1	unc-51 like autophagy activating kinase 2 [Source:HGNC Symbol;Acc:13480]	0	Y	N	N
ENSG00000083457	Tier 1	ITGAE	17	3617922	3704537	-1	integrin, alpha E (antigen CD103, human mucosal lymphocyte antigen 1; alpha polypeptide) [Source:HGNC Symbol;Acc:6147]	0	N	Y	N
ENSG00000084207	Tier 1	GSTP1	11	67351066	67354131	1	glutathione S-transferase pi 1 [Source:HGNC Symbol;Acc:4638]	0	Y	N	Y
ENSG00000084453	Tier 1	SLCO1A2	12	21417534	21572528	-1	solute carrier organic anion transporter family, member 1A2 [Source:HGNC Symbol;Acc:10956]	15	N	N	Y
ENSG00000084674	Tier 1	APOB	2	21224301	21266945	-1	apolipoprotein B [Source:HGNC Symbol;Acc:603]	36	Y	Y	N
ENSG00000085511	Tier 1	MAP3K4	6	161412759	161538417	1	mitogen-activated protein kinase kinase kinase 4 [Source:HGNC Symbol;Acc:6856]	0	Y	N	N
ENSG00000085563	Tier 1	ABCB1	7	87133175	87342611	-1	ATP-binding cassette, sub-family B (MDR/TAP), member 1 [Source:HGNC Symbol;Acc:40]	0	Y	Y	Y
ENSG00000085662	Tier 1	AKR1B1	7	134127102	134144036	-1	aldo-keto reductase family 1, member B1 (aldose reductase) [Source:HGNC Symbol;Acc:381]	0	Y	Y	N
ENSG00000085871	Tier 1	MGST2	4	140586922	140661899	1	microsomal glutathione S-transferase 2 [Source:HGNC Symbol;Acc:7063]	0	N	N	Y
ENSG00000086205	Tier 1	FOLH1	11	49168187	49230222	-1	folate hydrolase (prostate-specific membrane antigen) 1 [Source:HGNC Symbol;Acc:3788]	2	Y	Y	N
ENSG00000086548	Tier 1	CEACAM6	19	42254885	42276113	1	carcinoembryonic antigen-related cell adhesion molecule 6 (non-specific cross reacting antigen) [Source:HGNC Symbol;Acc:1818]	0	N	Y	N
ENSG00000087076	Tier 1	HSD17B14	19	49316274	49339935	-1	hydroxysteroid (17-beta) dehydrogenase 14 [Source:HGNC Symbol;Acc:23238]	0	N	N	Y
ENSG00000087085	Tier 1	ACHE	7	100487615	100494594	-1	acetylcholinesterase (Yt blood group) [Source:HGNC Symbol;Acc:108]	5	Y	Y	N
ENSG00000087237	Tier 1	CETP	16	56995762	57017757	1	cholesteryl ester transfer protein, plasma [Source:HGNC Symbol;Acc:1869]	48	Y	Y	N
ENSG00000087245	Tier 1	MMP2	16	55423612	55540603	1	matrix metallopeptidase 2 (gelatinase A, 72kDa gelatinase, 72kDa type IV collagenase) [Source:HGNC Symbol;Acc:7166]	0	Y	Y	N
ENSG00000087494	Tier 1	PTHLH	12	28111017	28125638	-1	parathyroid hormone-like hormone [Source:HGNC Symbol;Acc:9607]	0	N	Y	N
ENSG00000087586	Tier 1	AURKA	20	54944445	54967393	-1	aurora kinase A [Source:HGNC Symbol;Acc:11393]	0	Y	N	N
ENSG00000088002	Tier 1	SULT2B1	19	49055332	49102682	1	sulfotransferase family, cytosolic, 2B, member 1 [Source:HGNC Symbol;Acc:11459]	4	N	N	Y
ENSG00000088386	Tier 1	SLC15A1	13	99336055	99404908	-1	solute carrier family 15 (oligopeptide transporter), member 1 [Source:HGNC Symbol;Acc:10920]	1	Y	N	Y
ENSG00000088832	Tier 1	FKBP1A	20	1349622	1373806	-1	FK506 binding protein 1A, 12kDa [Source:HGNC Symbol;Acc:3711]	0	Y	N	N
ENSG00000089250	Tier 1	NOS1	12	117645947	117889975	-1	nitric oxide synthase 1 (neuronal) [Source:HGNC Symbol;Acc:7872]	0	Y	N	Y
ENSG00000089597	Tier 1	GANAB	11	62392298	62414104	-1	glucosidase, alpha; neutral AB [Source:HGNC Symbol;Acc:4138]	0	Y	N	N
ENSG00000090020	Tier 1	SLC9A1	1	27425306	27493472	-1	solute carrier family 9, subfamily A (NHE1, cation proton antiporter 1), member 1 [Source:HGNC Symbol;Acc:11071]	0	Y	N	N
ENSG00000090339	Tier 1	ICAM1	19	10381511	10397291	1	intercellular adhesion molecule 1 [Source:HGNC Symbol;Acc:5344]	7	Y	Y	N
ENSG00000090376	Tier 1	IRAK3	12	66582659	66648402	1	interleukin-1 receptor-associated kinase 3 [Source:HGNC Symbol;Acc:17020]	0	Y	N	N
ENSG00000090402	Tier 1	SI	3	164696686	164796283	-1	sucrase-isomaltase (alpha-glucosidase) [Source:HGNC Symbol;Acc:10856]	0	Y	N	N
ENSG00000090534	Tier 1	THPO	3	184089723	184095932	-1	thrombopoietin [Source:HGNC Symbol;Acc:11795]	1	Y	Y	N
ENSG00000091128	Tier 1	LAMB4	7	107663993	107770801	-1	laminin, beta 4 [Source:HGNC Symbol;Acc:6491]	0	N	Y	N
ENSG00000091136	Tier 1	LAMB1	7	107564244	107643700	-1	laminin, beta 1 [Source:HGNC Symbol;Acc:6486]	4	N	Y	N
ENSG00000091181	Tier 1	IL5RA	3	3111233	3168297	-1	interleukin 5 receptor, alpha [Source:HGNC Symbol;Acc:6017]	0	N	Y	N
ENSG00000091262	Tier 1	ABCC6	16	16242785	16317379	-1	ATP-binding cassette, sub-family C (CFTR/MRP), member 6 [Source:HGNC Symbol;Acc:57]	0	Y	Y	Y
ENSG00000091436	Tier 1		2	173940163	174132738	1	Mitogen-activated protein kinase kinase kinase MLT [Source:UniProtKB/Swiss-Prot;Acc:Q9NYL2]	0	Y	N	N
ENSG00000091831	Tier 1	ESR1	6	151977826	152450754	1	estrogen receptor 1 [Source:HGNC Symbol;Acc:3467]	14	Y	N	N
ENSG00000091879	Tier 1	ANGPT2	8	6357172	6420930	-1	angiopoietin 2 [Source:HGNC Symbol;Acc:485]	0	N	Y	N
ENSG00000091972	Tier 1	CD200	3	112051194	112081659	1	CD200 molecule [Source:HGNC Symbol;Acc:7203]	0	N	Y	N
ENSG00000092009	Tier 1	CMA1	14	24974559	24977471	-1	chymase 1, mast cell [Source:HGNC Symbol;Acc:2097]	0	Y	Y	N
ENSG00000092054	Tier 1	MYH7	14	23881947	23904927	-1	myosin, heavy chain 7, cardiac muscle, beta [Source:HGNC Symbol;Acc:7577]	1	N	Y	N
ENSG00000092068	Tier 1	SLC7A8	14	23594504	23652883	-1	solute carrier family 7 (amino acid transporter light chain, L system), member 8 [Source:HGNC Symbol;Acc:11066]	3	N	N	Y
ENSG00000092096	Tier 1	SLC22A17	14	23815515	23822121	-1	solute carrier family 22, member 17 [Source:HGNC Symbol;Acc:23095]	0	Y	N	Y
ENSG00000092445	Tier 1	TYRO3	15	41849873	41871536	1	TYRO3 protein tyrosine kinase [Source:HGNC Symbol;Acc:12446]	0	Y	N	N
ENSG00000092969	Tier 1	TGFB2	1	218519577	218617961	1	transforming growth factor, beta 2 [Source:HGNC Symbol;Acc:11768]	7	N	Y	N
ENSG00000093010	Tier 1	COMT	22	19929130	19957498	1	catechol-O-methyltransferase [Source:HGNC Symbol;Acc:2228]	2	Y	N	N
ENSG00000094631	Tier 1	HDAC6	X	48659784	48683392	1	histone deacetylase 6 [Source:HGNC Symbol;Acc:14064]	0	Y	N	N
ENSG00000094963	Tier 1	FMO2	1	171154347	171181822	1	flavin containing monooxygenase 2 (non-functional) [Source:HGNC Symbol;Acc:3770]	0	N	N	Y
ENSG00000095303	Tier 1	PTGS1	9	125132824	125157982	1	prostaglandin-endoperoxide synthase 1 (prostaglandin G/H synthase and cyclooxygenase) [Source:HGNC Symbol;Acc:9604]	0	Y	Y	N
ENSG00000095464	Tier 1	PDE6C	10	95372345	95425767	1	phosphodiesterase 6C, cGMP-specific, cone, alpha prime [Source:HGNC Symbol;Acc:8787]	0	Y	N	N
ENSG00000095596	Tier 1	CYP26A1	10	94833232	94837647	1	cytochrome P450, family 26, subfamily A, polypeptide 1 [Source:HGNC Symbol;Acc:2603]	0	Y	N	Y
ENSG00000096060	Tier 1	FKBP5	6	35541362	35696360	-1	FK506 binding protein 5 [Source:HGNC Symbol;Acc:3721]	1	Y	N	N
ENSG00000096063	Tier 1	SRPK1	6	35800743	35889119	-1	SRSF protein kinase 1 [Source:HGNC Symbol;Acc:11305]	1	Y	N	N
ENSG00000096384	Tier 1	HSP90AB1	6	44214824	44221620	1	heat shock protein 90kDa alpha (cytosolic), class B member 1 [Source:HGNC Symbol;Acc:5258]	0	Y	N	N
ENSG00000096717	Tier 1	SIRT1	10	69644427	69678147	1	sirtuin 1 [Source:HGNC Symbol;Acc:14929]	0	Y	N	N
ENSG00000096968	Tier 1	JAK2	9	4985033	5128183	1	Janus kinase 2 [Source:HGNC Symbol;Acc:6192]	5	Y	N	N
ENSG00000096996	Tier 1	IL12RB1	19	18169805	18209754	-1	interleukin 12 receptor, beta 1 [Source:HGNC Symbol;Acc:5971]	0	N	Y	N
ENSG00000097007	Tier 1	ABL1	9	133589333	133763062	1	c-abl oncogene 1, non-receptor tyrosine kinase [Source:HGNC Symbol;Acc:76]	0	Y	N	N
ENSG00000099250	Tier 1	NRP1	10	33466420	33625190	-1	neuropilin 1 [Source:HGNC Symbol;Acc:8004]	0	N	Y	N
ENSG00000099866	Tier 1	MADCAM1	19	489176	505347	1	mucosal vascular addressin cell adhesion molecule 1 [Source:HGNC Symbol;Acc:6765]	0	N	Y	N
ENSG00000099875	Tier 1	MKNK2	19	2037470	2051243	-1	MAP kinase interacting serine/threonine kinase 2 [Source:HGNC Symbol;Acc:7111]	0	Y	N	N
ENSG00000100030	Tier 1	MAPK1	22	22108789	22221970	-1	mitogen-activated protein kinase 1 [Source:HGNC Symbol;Acc:6871]	1	Y	N	N
ENSG00000100170	Tier 1	SLC5A1	22	32439019	32509016	1	solute carrier family 5 (sodium/glucose cotransporter), member 1 [Source:HGNC Symbol;Acc:11036]	0	Y	N	N
ENSG00000100191	Tier 1	SLC5A4	22	32614465	32651328	-1	solute carrier family 5 (glucose activated ion channel), member 4 [Source:HGNC Symbol;Acc:11039]	0	Y	N	N
ENSG00000100197	Tier 1	CYP2D6	22	42522501	42526908	-1	cytochrome P450, family 2, subfamily D, polypeptide 6 [Source:HGNC Symbol;Acc:2625]	5	Y	N	Y
ENSG00000100243	Tier 1	CYB5R3	22	43013846	43045574	-1	cytochrome b5 reductase 3 [Source:HGNC Symbol;Acc:2873]	0	N	N	Y
ENSG00000100299	Tier 1	ARSA	22	51061182	51066607	-1	arylsulfatase A [Source:HGNC Symbol;Acc:713]	2	N	Y	Y
ENSG00000100346	Tier 1	CACNA1I	22	39966758	40085742	1	calcium channel, voltage-dependent, T type, alpha 1I subunit [Source:HGNC Symbol;Acc:1396]	0	Y	N	N
ENSG00000100385	Tier 1	IL2RB	22	37521878	37571094	-1	interleukin 2 receptor, beta [Source:HGNC Symbol;Acc:6009]	1	N	Y	N
ENSG00000100429	Tier 1	HDAC10	22	50683612	50689834	-1	histone deacetylase 10 [Source:HGNC Symbol;Acc:18128]	0	Y	N	N
ENSG00000100433	Tier 1	KCNK10	14	88649113	88793251	-1	potassium channel, subfamily K, member 10 [Source:HGNC Symbol;Acc:6273]	0	Y	N	N
ENSG00000100577	Tier 1	GSTZ1	14	77787227	77797940	1	glutathione S-transferase zeta 1 [Source:HGNC Symbol;Acc:4643]	0	N	N	Y
ENSG00000100612	Tier 1	DHRS7	14	60610838	60636574	-1	dehydrogenase/reductase (SDR family) member 7 [Source:HGNC Symbol;Acc:21524]	0	N	N	Y
ENSG00000100644	Tier 1	HIF1A	14	62162231	62214976	1	hypoxia inducible factor 1, alpha subunit (basic helix-loop-helix transcription factor) [Source:HGNC Symbol;Acc:4910]	0	Y	N	N
ENSG00000100652	Tier 1	SLC10A1	14	70242134	70264006	-1	solute carrier family 10 (sodium/bile acid cotransporter), member 1 [Source:HGNC Symbol;Acc:10905]	0	Y	N	Y
ENSG00000100739	Tier 1	BDKRB1	14	96722161	96735304	1	bradykinin receptor B1 [Source:HGNC Symbol;Acc:1029]	0	Y	Y	N
ENSG00000100784	Tier 1	RPS6KA5	14	91336799	91526980	-1	ribosomal protein S6 kinase, 90kDa, polypeptide 5 [Source:HGNC Symbol;Acc:10434]	1	Y	N	N
ENSG00000100804	Tier 1	PSMB5	14	23485752	23504439	-1	proteasome (prosome, macropain) subunit, beta type, 5 [Source:HGNC Symbol;Acc:9542]	1	Y	Y	N
ENSG00000100823	Tier 1	APEX1	14	20923350	20925927	1	APEX nuclease (multifunctional DNA repair enzyme) 1 [Source:HGNC Symbol;Acc:587]	0	Y	N	N
ENSG00000100867	Tier 1	DHRS2	14	24099324	24114848	1	dehydrogenase/reductase (SDR family) member 2 [Source:HGNC Symbol;Acc:18349]	0	N	N	Y
ENSG00000100983	Tier 1	GSS	20	33516236	33543620	-1	glutathione synthetase [Source:HGNC Symbol;Acc:4624]	11	N	N	Y
ENSG00000100985	Tier 1	MMP9	20	44637547	44645200	1	matrix metallopeptidase 9 (gelatinase B, 92kDa gelatinase, 92kDa type IV collagenase) [Source:HGNC Symbol;Acc:7176]	0	Y	Y	N
ENSG00000100997	Tier 1	ABHD12	20	25275379	25371619	-1	abhydrolase domain containing 12 [Source:HGNC Symbol;Acc:15868]	1	Y	N	N
ENSG00000101017	Tier 1	CD40	20	44746911	44758502	1	CD40 molecule, TNF receptor superfamily member 5 [Source:HGNC Symbol;Acc:11919]	7	N	Y	N
ENSG00000101076	Tier 1	HNF4A	20	42984340	43061485	1	hepatocyte nuclear factor 4, alpha [Source:HGNC Symbol;Acc:5024]	7	Y	N	Y
ENSG00000101109	Tier 1	STK4	20	43595115	43708600	1	serine/threonine kinase 4 [Source:HGNC Symbol;Acc:11408]	0	Y	N	N
ENSG00000101162	Tier 1	TUBB1	20	57594309	57601709	1	tubulin, beta 1 class VI [Source:HGNC Symbol;Acc:16257]	2	Y	Y	N
ENSG00000101180	Tier 1	HRH3	20	60790026	60795323	-1	histamine receptor H3 [Source:HGNC Symbol;Acc:5184]	0	Y	Y	N
ENSG00000101187	Tier 1	SLCO4A1	20	61273797	61317137	1	solute carrier organic anion transporter family, member 4A1 [Source:HGNC Symbol;Acc:10953]	0	N	N	Y
ENSG00000101188	Tier 1	NTSR1	20	61340189	61394123	1	neurotensin receptor 1 (high affinity) [Source:HGNC Symbol;Acc:8039]	0	Y	Y	N
ENSG00000101204	Tier 1	CHRNA4	20	61975420	62009753	-1	cholinergic receptor, nicotinic, alpha 4 (neuronal) [Source:HGNC Symbol;Acc:1958]	0	Y	N	N
ENSG00000101213	Tier 1	PTK6	20	62159778	62168723	-1	protein tyrosine kinase 6 [Source:HGNC Symbol;Acc:9617]	0	Y	N	N
ENSG00000101266	Tier 1	CSNK2A1	20	459116	524465	-1	casein kinase 2, alpha 1 polypeptide [Source:HGNC Symbol;Acc:2457]	0	Y	N	N
ENSG00000101306	Tier 1	MYLK2	20	30407111	30422492	1	myosin light chain kinase 2 [Source:HGNC Symbol;Acc:16243]	0	Y	N	N
ENSG00000101336	Tier 1	HCK	20	30639991	30689659	1	hemopoietic cell kinase [Source:HGNC Symbol;Acc:4840]	0	Y	N	N
ENSG00000101349	Tier 1	PAK7	20	9518036	9819689	-1	p21 protein (Cdc42/Rac)-activated kinase 7 [Source:HGNC Symbol;Acc:15916]	0	Y	N	N
ENSG00000101680	Tier 1	LAMA1	18	6941743	7117813	-1	laminin, alpha 1 [Source:HGNC Symbol;Acc:6481]	2	N	Y	N
ENSG00000101782	Tier 1	RIOK3	18	21032787	21066567	1	RIO kinase 3 [Source:HGNC Symbol;Acc:11451]	0	Y	N	N
ENSG00000101846	Tier 1	STS	X	7137497	7272851	1	steroid sulfatase (microsomal), isozyme S [Source:HGNC Symbol;Acc:11425]	0	Y	Y	N
ENSG00000101868	Tier 1	POLA1	X	24712036	25015103	1	polymerase (DNA directed), alpha 1, catalytic subunit [Source:HGNC Symbol;Acc:9173]	0	Y	N	N
ENSG00000101966	Tier 1	XIAP	X	122993574	123047829	1	X-linked inhibitor of apoptosis [Source:HGNC Symbol;Acc:592]	0	Y	N	N
ENSG00000102001	Tier 1	CACNA1F	X	49061523	49089833	-1	calcium channel, voltage-dependent, L type, alpha 1F subunit [Source:HGNC Symbol;Acc:1393]	0	Y	N	N
ENSG00000102010	Tier 1	BMX	X	15482369	15574652	1	BMX non-receptor tyrosine kinase [Source:HGNC Symbol;Acc:1079]	0	Y	N	N
ENSG00000102096	Tier 1	PIM2	X	48770459	48776301	-1	pim-2 oncogene [Source:HGNC Symbol;Acc:8987]	0	Y	N	N
ENSG00000102225	Tier 1	CDK16	X	47077259	47089396	1	cyclin-dependent kinase 16 [Source:HGNC Symbol;Acc:8749]	0	Y	N	N
ENSG00000102245	Tier 1	CD40LG	X	135730352	135742549	1	CD40 ligand [Source:HGNC Symbol;Acc:11935]	0	N	Y	N
ENSG00000102312	Tier 1	PORCN	X	48367350	48379202	1	porcupine homolog (Drosophila) [Source:HGNC Symbol;Acc:17652]	0	Y	N	N
ENSG00000102393	Tier 1	GLA	X	100652791	100662913	-1	galactosidase, alpha [Source:HGNC Symbol;Acc:4296]	0	Y	Y	N
ENSG00000102468	Tier 1	HTR2A	13	47405685	47471169	-1	5-hydroxytryptamine (serotonin) receptor 2A, G protein-coupled [Source:HGNC Symbol;Acc:5293]	0	Y	Y	N
ENSG00000102524	Tier 1	TNFSF13B	13	108903588	108960832	1	tumor necrosis factor (ligand) superfamily, member 13b [Source:HGNC Symbol;Acc:11929]	0	N	Y	N
ENSG00000102539	Tier 1	MLNR	13	49794474	49796513	1	motilin receptor [Source:HGNC Symbol;Acc:4495]	0	Y	Y	N
ENSG00000102572	Tier 1	STK24	13	99102455	99230194	-1	serine/threonine kinase 24 [Source:HGNC Symbol;Acc:11403]	0	Y	N	N
ENSG00000102755	Tier 1	FLT1	13	28874489	29069265	-1	fms-related tyrosine kinase 1 [Source:HGNC Symbol;Acc:3763]	0	Y	Y	N
ENSG00000102796	Tier 1	DHRS12	13	52342129	52378293	-1	dehydrogenase/reductase (SDR family) member 12 [Source:HGNC Symbol;Acc:25832]	0	N	N	Y
ENSG00000102854	Tier 1	MSLN	16	810762	818865	1	mesothelin [Source:HGNC Symbol;Acc:7371]	0	N	Y	N
ENSG00000102882	Tier 1	MAPK3	16	30125426	30134827	-1	mitogen-activated protein kinase 3 [Source:HGNC Symbol;Acc:6877]	1	Y	N	N
ENSG00000102967	Tier 1	DHODH	16	72042487	72058954	1	dihydroorotate dehydrogenase (quinone) [Source:HGNC Symbol;Acc:2867]	6	Y	N	N
ENSG00000102996	Tier 1	MMP15	16	58059470	58080805	1	matrix metallopeptidase 15 (membrane-inserted) [Source:HGNC Symbol;Acc:7161]	2	Y	N	N
ENSG00000103222	Tier 1	ABCC1	16	16043434	16236931	1	ATP-binding cassette, sub-family C (CFTR/MRP), member 1 [Source:HGNC Symbol;Acc:51]	4	Y	Y	Y
ENSG00000103257	Tier 1	SLC7A5	16	87863629	87903094	-1	solute carrier family 7 (amino acid transporter light chain, L system), member 5 [Source:HGNC Symbol;Acc:11063]	1	N	N	Y
ENSG00000103546	Tier 1	SLC6A2	16	55689516	55740104	1	solute carrier family 6 (neurotransmitter transporter), member 2 [Source:HGNC Symbol;Acc:11048]	0	Y	N	N
ENSG00000103642	Tier 1	LACTB	15	63413999	63434260	1	lactamase, beta [Source:HGNC Symbol;Acc:16468]	2	Y	N	N
ENSG00000103653	Tier 1	CSK	15	75074398	75095539	1	c-src tyrosine kinase [Source:HGNC Symbol;Acc:2444]	9	Y	N	N
ENSG00000103855	Tier 1	CD276	15	73976307	74006859	1	CD276 molecule [Source:HGNC Symbol;Acc:19137]	1	N	Y	N
ENSG00000104205	Tier 1	SGK3	8	67624653	67774257	1	serum/glucocorticoid regulated kinase family, member 3 [Source:HGNC Symbol;Acc:10812]	0	Y	N	N
ENSG00000104267	Tier 1	CA2	8	86376081	86393722	1	carbonic anhydrase II [Source:HGNC Symbol;Acc:1373]	1	Y	N	N
ENSG00000104312	Tier 1	RIPK2	8	90769975	90803291	1	receptor-interacting serine-threonine kinase 2 [Source:HGNC Symbol;Acc:10020]	3	Y	N	N
ENSG00000104321	Tier 1	TRPA1	8	72932152	72987852	-1	transient receptor potential cation channel, subfamily A, member 1 [Source:HGNC Symbol;Acc:497]	0	Y	N	N
ENSG00000104365	Tier 1	IKBKB	8	42128820	42189973	1	inhibitor of kappa light polypeptide gene enhancer in B-cells, kinase beta [Source:HGNC Symbol;Acc:5960]	2	Y	N	N
ENSG00000104368	Tier 1	PLAT	8	42032236	42065242	-1	plasminogen activator, tissue [Source:HGNC Symbol;Acc:9051]	2	Y	Y	N
ENSG00000104375	Tier 1	STK3	8	99413631	99955055	-1	serine/threonine kinase 3 [Source:HGNC Symbol;Acc:11406]	0	Y	N	N
ENSG00000104549	Tier 1	SQLE	8	126010739	126034525	1	squalene epoxidase [Source:HGNC Symbol;Acc:11279]	0	Y	N	N
ENSG00000104687	Tier 1	GSR	8	30535583	30585443	-1	glutathione reductase [Source:HGNC Symbol;Acc:4623]	0	Y	N	Y
ENSG00000104689	Tier 1	TNFRSF10A	8	23047965	23082639	-1	tumor necrosis factor receptor superfamily, member 10a [Source:HGNC Symbol;Acc:11904]	1	N	Y	N
ENSG00000104774	Tier 1	MAN2B1	19	12757325	12777556	-1	mannosidase, alpha, class 2B, member 1 [Source:HGNC Symbol;Acc:6826]	1	Y	Y	N
ENSG00000104783	Tier 1	KCNN4	19	44270685	44285409	-1	potassium intermediate/small conductance calcium-activated channel, subfamily N, member 4 [Source:HGNC Symbol;Acc:6293]	2	Y	N	N
ENSG00000104814	Tier 1	MAP4K1	19	39078281	39109522	-1	mitogen-activated protein kinase kinase kinase kinase 1 [Source:HGNC Symbol;Acc:6863]	0	Y	N	N
ENSG00000104833	Tier 1	TUBB4A	19	6494330	6502859	-1	tubulin, beta 4A class IVa [Source:HGNC Symbol;Acc:20774]	0	Y	Y	N
ENSG00000104894	Tier 1	CD37	19	49838428	49846592	1	CD37 molecule [Source:HGNC Symbol;Acc:1666]	1	N	Y	N
ENSG00000104921	Tier 1	FCER2	19	7753644	7767032	-1	Fc fragment of IgE, low affinity II, receptor for (CD23) [Source:HGNC Symbol;Acc:3612]	0	Y	Y	N
ENSG00000104936	Tier 1	DMPK	19	46272975	46285810	-1	dystrophia myotonica-protein kinase [Source:HGNC Symbol;Acc:2933]	0	Y	N	N
ENSG00000105146	Tier 1	AURKC	19	57742377	57746916	1	aurora kinase C [Source:HGNC Symbol;Acc:11391]	0	Y	N	N
ENSG00000105173	Tier 1	CCNE1	19	30302805	30315215	1	cyclin E1 [Source:HGNC Symbol;Acc:1589]	2	Y	N	N
ENSG00000105204	Tier 1	DYRK1B	19	40315990	40324841	-1	dual-specificity tyrosine-(Y)-phosphorylation regulated kinase 1B [Source:HGNC Symbol;Acc:3092]	0	Y	N	N
ENSG00000105221	Tier 1	AKT2	19	40736224	40791443	-1	v-akt murine thymoma viral oncogene homolog 2 [Source:HGNC Symbol;Acc:392]	0	Y	N	N
ENSG00000105287	Tier 1	PRKD2	19	47177532	47220384	-1	protein kinase D2 [Source:HGNC Symbol;Acc:17293]	2	Y	N	N
ENSG00000105329	Tier 1	TGFB1	19	41807492	41859816	-1	transforming growth factor, beta 1 [Source:HGNC Symbol;Acc:11766]	1	Y	Y	N
ENSG00000105383	Tier 1	CD33	19	51728320	51747115	1	CD33 molecule [Source:HGNC Symbol;Acc:1659]	1	N	Y	N
ENSG00000105388	Tier 1	CEACAM5	19	42212504	42233718	1	carcinoembryonic antigen-related cell adhesion molecule 5 [Source:HGNC Symbol;Acc:1817]	0	N	Y	N
ENSG00000105397	Tier 1	TYK2	19	10461209	10491352	-1	tyrosine kinase 2 [Source:HGNC Symbol;Acc:12440]	7	Y	N	N
ENSG00000105398	Tier 1	SULT2A1	19	48373723	48389654	-1	sulfotransferase family, cytosolic, 2A, dehydroepiandrosterone (DHEA)-preferring, member 1 [Source:HGNC Symbol;Acc:11458]	10	N	N	Y
ENSG00000105409	Tier 1	ATP1A3	19	42470734	42501649	-1	ATPase, Na+/K+ transporting, alpha 3 polypeptide [Source:HGNC Symbol;Acc:801]	0	Y	N	N
ENSG00000105464	Tier 1	GRIN2D	19	48898132	48948188	1	glutamate receptor, ionotropic, N-methyl D-aspartate 2D [Source:HGNC Symbol;Acc:4588]	0	Y	N	N
ENSG00000105613	Tier 1	MAST1	19	12944765	12985765	1	microtubule associated serine/threonine kinase 1 [Source:HGNC Symbol;Acc:19034]	1	Y	N	N
ENSG00000105639	Tier 1	JAK3	19	17935589	17958880	-1	Janus kinase 3 [Source:HGNC Symbol;Acc:6193]	0	Y	N	N
ENSG00000105650	Tier 1	PDE4C	19	18318771	18366229	-1	phosphodiesterase 4C, cAMP-specific [Source:HGNC Symbol;Acc:8782]	1	Y	N	N
ENSG00000105675	Tier 1	ATP4A	19	36040945	36054560	-1	ATPase, H+/K+ exchanging, alpha polypeptide [Source:HGNC Symbol;Acc:819]	0	Y	N	N
ENSG00000105695	Tier 1	MAG	19	35783028	35804707	1	myelin associated glycoprotein [Source:HGNC Symbol;Acc:6783]	0	N	Y	N
ENSG00000105697	Tier 1	HAMP	19	35771619	35776046	1	hepcidin antimicrobial peptide [Source:HGNC Symbol;Acc:15598]	0	N	Y	N
ENSG00000105723	Tier 1	GSK3A	19	42734338	42746777	-1	glycogen synthase kinase 3 alpha [Source:HGNC Symbol;Acc:4616]	0	Y	N	N
ENSG00000105737	Tier 1	GRIK5	19	42502473	42573650	-1	glutamate receptor, ionotropic, kainate 5 [Source:HGNC Symbol;Acc:4583]	0	Y	N	N
ENSG00000105810	Tier 1	CDK6	7	92234235	92465908	-1	cyclin-dependent kinase 6 [Source:HGNC Symbol;Acc:1777]	9	Y	N	N
ENSG00000105851	Tier 1	PIK3CG	7	106505723	106547590	1	phosphatidylinositol-4,5-bisphosphate 3-kinase, catalytic subunit gamma [Source:HGNC Symbol;Acc:8978]	0	Y	N	N
ENSG00000105852	Tier 1	PON3	7	94989256	95025680	-1	paraoxonase 3 [Source:HGNC Symbol;Acc:9206]	0	N	Y	Y
ENSG00000105854	Tier 1	PON2	7	95034175	95064510	-1	paraoxonase 2 [Source:HGNC Symbol;Acc:9205]	0	N	Y	Y
ENSG00000105976	Tier 1	MET	7	116312444	116438440	1	met proto-oncogene [Source:HGNC Symbol;Acc:7029]	1	Y	Y	N
ENSG00000106123	Tier 1	EPHB6	7	142552792	142568847	1	EPH receptor B6 [Source:HGNC Symbol;Acc:3396]	0	Y	Y	N
ENSG00000106128	Tier 1	GHRHR	7	30978284	31032869	1	growth hormone releasing hormone receptor [Source:HGNC Symbol;Acc:4266]	0	Y	Y	N
ENSG00000106211	Tier 1	HSPB1	7	75931861	75933612	1	heat shock 27kDa protein 1 [Source:HGNC Symbol;Acc:5246]	0	Y	N	N
ENSG00000106258	Tier 1	CYP3A5	7	99245817	99277621	-1	cytochrome P450, family 3, subfamily A, polypeptide 5 [Source:HGNC Symbol;Acc:2638]	5	Y	N	Y
ENSG00000106348	Tier 1	IMPDH1	7	128032331	128050306	-1	IMP (inosine 5'-monophosphate) dehydrogenase 1 [Source:HGNC Symbol;Acc:6052]	0	Y	N	N
ENSG00000106546	Tier 1	AHR	7	17338246	17385776	1	aryl hydrocarbon receptor [Source:HGNC Symbol;Acc:348]	1	Y	N	Y
ENSG00000106688	Tier 1	SLC1A1	9	4490444	4587469	1	solute carrier family 1 (neuronal/epithelial high affinity glutamate transporter, system Xag), member 1 [Source:HGNC Symbol;Acc:10939]	0	Y	N	N
ENSG00000106799	Tier 1	TGFBR1	9	101866320	101916474	1	transforming growth factor, beta receptor 1 [Source:HGNC Symbol;Acc:11772]	1	Y	Y	N
ENSG00000106804	Tier 1	C5	9	123714616	123812554	-1	complement component 5 [Source:HGNC Symbol;Acc:1331]	8	N	Y	N
ENSG00000106991	Tier 1	ENG	9	130577291	130617035	-1	endoglin [Source:HGNC Symbol;Acc:3349]	0	N	Y	N
ENSG00000107140	Tier 1	TESK1	9	35605367	35610038	1	testis-specific kinase 1 [Source:HGNC Symbol;Acc:11731]	0	Y	N	N
ENSG00000107159	Tier 1	CA9	9	35673853	35681156	1	carbonic anhydrase IX [Source:HGNC Symbol;Acc:1383]	0	Y	Y	N
ENSG00000107165	Tier 1	TYRP1	9	12685439	12710290	1	tyrosinase-related protein 1 [Source:HGNC Symbol;Acc:12450]	2	Y	Y	N
ENSG00000107643	Tier 1	MAPK8	10	49514698	49647403	1	mitogen-activated protein kinase 8 [Source:HGNC Symbol;Acc:6881]	0	Y	N	N
ENSG00000107854	Tier 1	TNKS2	10	93558069	93625033	1	tankyrase, TRF1-interacting ankyrin-related ADP-ribose polymerase 2 [Source:HGNC Symbol;Acc:15677]	0	Y	N	N
ENSG00000107984	Tier 1	DKK1	10	54074056	54077802	1	dickkopf WNT signaling pathway inhibitor 1 [Source:HGNC Symbol;Acc:2891]	0	Y	Y	N
ENSG00000108242	Tier 1	CYP2C18	10	96443251	96495947	1	cytochrome P450, family 2, subfamily C, polypeptide 18 [Source:HGNC Symbol;Acc:2620]	10	Y	N	Y
ENSG00000108405	Tier 1	P2RX1	17	3799886	3819794	-1	purinergic receptor P2X, ligand-gated ion channel, 1 [Source:HGNC Symbol;Acc:8533]	0	Y	N	N
ENSG00000108443	Tier 1	RPS6KB1	17	57970447	58027925	1	ribosomal protein S6 kinase, 70kDa, polypeptide 1 [Source:HGNC Symbol;Acc:10436]	2	Y	N	N
ENSG00000108556	Tier 1	CHRNE	17	4801069	4806369	-1	cholinergic receptor, nicotinic, epsilon (muscle) [Source:HGNC Symbol;Acc:1966]	2	Y	Y	N
ENSG00000108576	Tier 1	SLC6A4	17	28521337	28563020	-1	solute carrier family 6 (neurotransmitter transporter), member 4 [Source:HGNC Symbol;Acc:11050]	1	Y	N	N
ENSG00000108602	Tier 1	ALDH3A1	17	19641297	19652256	-1	aldehyde dehydrogenase 3 family, member A1 [Source:HGNC Symbol;Acc:405]	0	Y	N	Y
ENSG00000108691	Tier 1	CCL2	17	32582304	32584222	1	chemokine (C-C motif) ligand 2 [Source:HGNC Symbol;Acc:10618]	3	N	Y	N
ENSG00000108786	Tier 1	HSD17B1	17	40701232	40707231	1	hydroxysteroid (17-beta) dehydrogenase 1 [Source:HGNC Symbol;Acc:5210]	1	Y	N	N
ENSG00000108840	Tier 1	HDAC5	17	42154114	42201070	-1	histone deacetylase 5 [Source:HGNC Symbol;Acc:14068]	3	Y	N	N
ENSG00000108846	Tier 1	ABCC3	17	48712138	48769613	1	ATP-binding cassette, sub-family C (CFTR/MRP), member 3 [Source:HGNC Symbol;Acc:54]	1	Y	Y	Y
ENSG00000108984	Tier 1	MAP2K6	17	67410839	67539472	1	mitogen-activated protein kinase kinase 6 [Source:HGNC Symbol;Acc:6846]	0	Y	N	N
ENSG00000109016	Tier 1	DHRS7B	17	21026677	21096578	1	dehydrogenase/reductase (SDR family) member 7B [Source:HGNC Symbol;Acc:24547]	0	N	N	Y
ENSG00000109099	Tier 1	PMP22	17	15133095	15168643	-1	peripheral myelin protein 22 [Source:HGNC Symbol;Acc:9118]	0	Y	N	N
ENSG00000109158	Tier 1	GABRA4	4	46920917	46996424	-1	gamma-aminobutyric acid (GABA) A receptor, alpha 4 [Source:HGNC Symbol;Acc:4078]	0	Y	Y	N
ENSG00000109163	Tier 1	GNRHR	4	68605046	68620078	-1	gonadotropin-releasing hormone receptor [Source:HGNC Symbol;Acc:4421]	0	Y	Y	N
ENSG00000109181	Tier 1	UGT2B10	4	69681711	69696914	1	UDP glucuronosyltransferase 2 family, polypeptide B10 [Source:HGNC Symbol;Acc:12544]	5	N	Y	Y
ENSG00000109193	Tier 1	SULT1E1	4	70676498	70725870	-1	sulfotransferase family 1E, estrogen-preferring, member 1 [Source:HGNC Symbol;Acc:11377]	0	N	N	Y
ENSG00000109320	Tier 1	NFKB1	4	103422486	103538459	1	nuclear factor of kappa light polypeptide gene enhancer in B-cells 1 [Source:HGNC Symbol;Acc:7794]	2	Y	N	N
ENSG00000109339	Tier 1	MAPK10	4	86936276	87515284	-1	mitogen-activated protein kinase 10 [Source:HGNC Symbol;Acc:6872]	0	Y	N	N
ENSG00000109471	Tier 1	IL2	4	123372625	123377880	-1	interleukin 2 [Source:HGNC Symbol;Acc:6001]	9	N	Y	N
ENSG00000109610	Tier 1	SOD3	4	24791534	24802464	1	superoxide dismutase 3, extracellular [Source:HGNC Symbol;Acc:11181]	0	N	Y	Y
ENSG00000110063	Tier 1	DCPS	11	126173647	126215644	1	decapping enzyme, scavenger [Source:HGNC Symbol;Acc:29812]	0	Y	N	N
ENSG00000110092	Tier 1	CCND1	11	69455855	69469242	1	cyclin D1 [Source:HGNC Symbol;Acc:1582]	2	Y	N	N
ENSG00000110148	Tier 1	CCKBR	11	6280966	6293357	1	cholecystokinin B receptor [Source:HGNC Symbol;Acc:1571]	0	Y	Y	N
ENSG00000110195	Tier 1	FOLR1	11	71900602	71907345	1	folate receptor 1 (adult) [Source:HGNC Symbol;Acc:3791]	0	N	Y	N
ENSG00000110330	Tier 1	BIRC2	11	102217942	102249401	1	baculoviral IAP repeat containing 2 [Source:HGNC Symbol;Acc:590]	0	Y	N	N
ENSG00000110422	Tier 1	HIPK3	11	33278218	33378569	1	homeodomain interacting protein kinase 3 [Source:HGNC Symbol;Acc:4915]	0	Y	N	N
ENSG00000110448	Tier 1	CD5	11	60869867	60895324	1	CD5 molecule [Source:HGNC Symbol;Acc:1685]	0	N	Y	N
ENSG00000110628	Tier 1	SLC22A18	11	2920951	2946476	1	solute carrier family 22, member 18 [Source:HGNC Symbol;Acc:10964]	0	N	N	Y
ENSG00000110680	Tier 1	CALCA	11	14988214	14993900	-1	calcitonin-related polypeptide alpha [Source:HGNC Symbol;Acc:1437]	0	Y	Y	N
ENSG00000110799	Tier 1	VWF	12	6058040	6233936	-1	von Willebrand factor [Source:HGNC Symbol;Acc:12726]	1	N	Y	N
ENSG00000110931	Tier 1	CAMKK2	12	121675497	121736111	-1	calcium/calmodulin-dependent protein kinase kinase 2, beta [Source:HGNC Symbol;Acc:1470]	0	Y	N	N
ENSG00000110944	Tier 1	IL23A	12	56732663	56734193	1	interleukin 23, alpha subunit p19 [Source:HGNC Symbol;Acc:15488]	3	N	Y	N
ENSG00000111012	Tier 1	CYP27B1	12	58156117	58162769	-1	cytochrome P450, family 27, subfamily B, polypeptide 1 [Source:HGNC Symbol;Acc:2606]	2	Y	N	Y
ENSG00000111057	Tier 1	KRT18	12	53342655	53346685	1	keratin 18 [Source:HGNC Symbol;Acc:6430]	0	N	Y	N
ENSG00000111142	Tier 1	METAP2	12	95867296	95909615	1	methionyl aminopeptidase 2 [Source:HGNC Symbol;Acc:16672]	0	Y	N	N
ENSG00000111144	Tier 1	LTA4H	12	96394606	96437298	-1	leukotriene A4 hydrolase [Source:HGNC Symbol;Acc:6710]	0	Y	N	N
ENSG00000111275	Tier 1	ALDH2	12	112204691	112247782	1	aldehyde dehydrogenase 2 family (mitochondrial) [Source:HGNC Symbol;Acc:404]	74	Y	N	Y
ENSG00000111319	Tier 1	SCNN1A	12	6456009	6486896	-1	sodium channel, non-voltage-gated 1 alpha subunit [Source:HGNC Symbol;Acc:10599]	0	Y	Y	N
ENSG00000111321	Tier 1	LTBR	12	6484211	6500733	1	lymphotoxin beta receptor (TNFR superfamily, member 3) [Source:HGNC Symbol;Acc:6718]	1	N	Y	N
ENSG00000111424	Tier 1	VDR	12	48235320	48336831	-1	vitamin D (1,25- dihydroxyvitamin D3) receptor [Source:HGNC Symbol;Acc:12679]	0	Y	N	N
ENSG00000111537	Tier 1	IFNG	12	68548548	68553527	-1	interferon, gamma [Source:HGNC Symbol;Acc:5438]	0	N	Y	N
ENSG00000111700	Tier 1	SLCO1B3	12	20963636	21243040	1	solute carrier organic anion transporter family, member 1B3 [Source:HGNC Symbol;Acc:10961]	6	N	N	Y
ENSG00000111816	Tier 1	FRK	6	116252312	116381921	-1	fyn-related kinase [Source:HGNC Symbol;Acc:3955]	4	Y	N	N
ENSG00000111837	Tier 1	MAK	6	10762956	10838764	-1	male germ cell-associated kinase [Source:HGNC Symbol;Acc:6816]	0	Y	N	N
ENSG00000112033	Tier 1	PPARD	6	35310335	35395968	1	peroxisome proliferator-activated receptor delta [Source:HGNC Symbol;Acc:9235]	3	Y	N	Y
ENSG00000112038	Tier 1	OPRM1	6	154331631	154568001	1	opioid receptor, mu 1 [Source:HGNC Symbol;Acc:8156]	1	Y	N	N
ENSG00000112062	Tier 1	MAPK14	6	35995488	36079013	1	mitogen-activated protein kinase 14 [Source:HGNC Symbol;Acc:6876]	0	Y	N	N
ENSG00000112096	Tier 1	SOD2	6	160090089	160183561	-1	superoxide dismutase 2, mitochondrial [Source:HGNC Symbol;Acc:11180]	0	N	N	Y
ENSG00000112115	Tier 1	IL17A	6	52051185	52055436	1	interleukin 17A [Source:HGNC Symbol;Acc:5981]	0	N	Y	N
ENSG00000112116	Tier 1	IL17F	6	52101479	52109335	-1	interleukin 17F [Source:HGNC Symbol;Acc:16404]	1	N	Y	N
ENSG00000112144	Tier 1	ICK	6	52866077	52926600	-1	intestinal cell (MAK-like) kinase [Source:HGNC Symbol;Acc:21219]	0	Y	N	N
ENSG00000112164	Tier 1	GLP1R	6	39016574	39055519	1	glucagon-like peptide 1 receptor [Source:HGNC Symbol;Acc:4324]	0	Y	Y	N
ENSG00000112294	Tier 1	ALDH5A1	6	24495080	24537435	1	aldehyde dehydrogenase 5 family, member A1 [Source:HGNC Symbol;Acc:408]	2	Y	N	Y
ENSG00000112312	Tier 1	GMNN	6	24775159	24786327	1	geminin, DNA replication inhibitor [Source:HGNC Symbol;Acc:17493]	0	Y	N	N
ENSG00000112499	Tier 1	SLC22A2	6	160592093	160698670	-1	solute carrier family 22 (organic cation transporter), member 2 [Source:HGNC Symbol;Acc:10966]	6	Y	N	Y
ENSG00000112541	Tier 1	PDE10A	6	165740776	166400091	-1	phosphodiesterase 10A [Source:HGNC Symbol;Acc:8772]	4	Y	N	N
ENSG00000112576	Tier 1	CCND3	6	41902671	42018095	-1	cyclin D3 [Source:HGNC Symbol;Acc:1585]	8	Y	N	N
ENSG00000112715	Tier 1	VEGFA	6	43737921	43754224	1	vascular endothelial growth factor A [Source:HGNC Symbol;Acc:12680]	0	N	Y	N
ENSG00000112739	Tier 1	PRPF4B	6	4021501	4065217	1	pre-mRNA processing factor 4B [Source:HGNC Symbol;Acc:17346]	0	Y	N	N
ENSG00000112742	Tier 1	TTK	6	80713604	80752244	1	TTK protein kinase [Source:HGNC Symbol;Acc:12401]	0	Y	N	N
ENSG00000112759	Tier 1	SLC29A1	6	44187242	44201888	1	solute carrier family 29 (equilibrative nucleoside transporter), member 1 [Source:HGNC Symbol;Acc:11003]	0	Y	N	Y
ENSG00000112769	Tier 1	LAMA4	6	112429963	112576141	-1	laminin, alpha 4 [Source:HGNC Symbol;Acc:6484]	0	N	Y	N
ENSG00000112964	Tier 1	GHR	5	42423879	42721979	1	growth hormone receptor [Source:HGNC Symbol;Acc:4263]	0	N	Y	N
ENSG00000113070	Tier 1	HBEGF	5	139712428	139726216	-1	heparin-binding EGF-like growth factor [Source:HGNC Symbol;Acc:3059]	0	N	Y	N
ENSG00000113161	Tier 1	HMGCR	5	74632154	74657929	1	3-hydroxy-3-methylglutaryl-CoA reductase [Source:HGNC Symbol;Acc:5006]	13	Y	N	N
ENSG00000113231	Tier 1	PDE8B	5	76506274	76725632	1	phosphodiesterase 8B [Source:HGNC Symbol;Acc:8794]	6	Y	N	N
ENSG00000113240	Tier 1	CLK4	5	178029665	178057616	-1	CDC-like kinase 4 [Source:HGNC Symbol;Acc:13659]	0	Y	N	N
ENSG00000113263	Tier 1	ITK	5	156569944	156682201	1	IL2-inducible T-cell kinase [Source:HGNC Symbol;Acc:6171]	0	Y	N	N
ENSG00000113302	Tier 1	IL12B	5	158741791	158757895	-1	interleukin 12B (natural killer cell stimulatory factor 2, cytotoxic lymphocyte maturation factor 2, p40) [Source:HGNC Symbol;Acc:5970]	5	N	Y	N
ENSG00000113327	Tier 1	GABRG2	5	161494546	161582542	1	gamma-aminobutyric acid (GABA) A receptor, gamma 2 [Source:HGNC Symbol;Acc:4087]	0	Y	Y	N
ENSG00000113448	Tier 1	PDE4D	5	58264865	59817947	-1	phosphodiesterase 4D, cAMP-specific [Source:HGNC Symbol;Acc:8783]	7	Y	N	N
ENSG00000113494	Tier 1	PRLR	5	35048861	35230794	-1	prolactin receptor [Source:HGNC Symbol;Acc:9446]	0	N	Y	N
ENSG00000113520	Tier 1	IL4	5	132009678	132018368	1	interleukin 4 [Source:HGNC Symbol;Acc:6014]	1	N	Y	N
ENSG00000113525	Tier 1	IL5	5	131877136	131892530	-1	interleukin 5 (colony-stimulating factor, eosinophil) [Source:HGNC Symbol;Acc:6016]	1	N	Y	N
ENSG00000113578	Tier 1	FGF1	5	141971743	142077617	-1	fibroblast growth factor 1 (acidic) [Source:HGNC Symbol;Acc:3665]	0	Y	Y	N
ENSG00000113580	Tier 1	NR3C1	5	142657496	142815077	-1	nuclear receptor subfamily 3, group C, member 1 (glucocorticoid receptor) [Source:HGNC Symbol;Acc:7978]	0	Y	N	N
ENSG00000113712	Tier 1	CSNK1A1	5	148871760	148931007	-1	casein kinase 1, alpha 1 [Source:HGNC Symbol;Acc:2451]	1	Y	N	N
ENSG00000113721	Tier 1	PDGFRB	5	149493400	149535435	-1	platelet-derived growth factor receptor, beta polypeptide [Source:HGNC Symbol;Acc:8804]	0	Y	Y	N
ENSG00000113749	Tier 1	HRH2	5	175085033	175113245	1	histamine receptor H2 [Source:HGNC Symbol;Acc:5183]	0	Y	N	N
ENSG00000114013	Tier 1	CD86	3	121774213	121839983	1	CD86 molecule [Source:HGNC Symbol;Acc:1705]	1	N	Y	N
ENSG00000114124	Tier 1	GRK7	3	141496990	141537332	1	G protein-coupled receptor kinase 7 [Source:HGNC Symbol;Acc:17031]	1	Y	N	N
ENSG00000114200	Tier 1	BCHE	3	165490692	165555260	-1	butyrylcholinesterase [Source:HGNC Symbol;Acc:983]	3	Y	Y	N
ENSG00000114770	Tier 1	ABCC5	3	183637722	183735803	-1	ATP-binding cassette, sub-family C (CFTR/MRP), member 5 [Source:HGNC Symbol;Acc:56]	1	Y	N	Y
ENSG00000114859	Tier 1	CLCN2	3	184063973	184079439	-1	chloride channel, voltage-sensitive 2 [Source:HGNC Symbol;Acc:2020]	1	Y	N	N
ENSG00000115008	Tier 1	IL1A	2	113531492	113542167	-1	interleukin 1, alpha [Source:HGNC Symbol;Acc:5991]	0	N	Y	N
ENSG00000115085	Tier 1	ZAP70	2	98330023	98356325	1	zeta-chain (TCR) associated protein kinase 70kDa [Source:HGNC Symbol;Acc:12858]	0	Y	N	N
ENSG00000115159	Tier 1	GPD2	2	157291802	157470247	1	glycerol-3-phosphate dehydrogenase 2 (mitochondrial) [Source:HGNC Symbol;Acc:4456]	0	Y	N	N
ENSG00000115170	Tier 1	ACVR1	2	158592958	158732374	-1	activin A receptor, type I [Source:HGNC Symbol;Acc:171]	0	Y	Y	N
ENSG00000115221	Tier 1	ITGB6	2	160956177	161128399	-1	integrin, beta 6 [Source:HGNC Symbol;Acc:6161]	2	Y	Y	N
ENSG00000115232	Tier 1	ITGA4	2	182321929	182400914	1	integrin, alpha 4 (antigen CD49D, alpha 4 subunit of VLA-4 receptor) [Source:HGNC Symbol;Acc:6140]	3	Y	Y	N
ENSG00000115310	Tier 1	RTN4	2	55199325	55339757	-1	reticulon 4 [Source:HGNC Symbol;Acc:14085]	0	N	Y	N
ENSG00000115353	Tier 1	TACR1	2	75273590	75426826	-1	tachykinin receptor 1 [Source:HGNC Symbol;Acc:11526]	1	Y	Y	N
ENSG00000115414	Tier 1	FN1	2	216225163	216300895	-1	fibronectin 1 [Source:HGNC Symbol;Acc:3778]	1	N	Y	N
ENSG00000115486	Tier 1	GGCX	2	85771846	85788670	-1	gamma-glutamyl carboxylase [Source:HGNC Symbol;Acc:4247]	1	Y	N	N
ENSG00000115526	Tier 1	CHST10	2	101008327	101034118	-1	carbohydrate sulfotransferase 10 [Source:HGNC Symbol;Acc:19650]	0	N	N	Y
ENSG00000115590	Tier 1	IL1R2	2	102608306	102645006	1	interleukin 1 receptor, type II [Source:HGNC Symbol;Acc:5994]	1	N	Y	N
ENSG00000115594	Tier 1	IL1R1	2	102681004	102796334	1	interleukin 1 receptor, type I [Source:HGNC Symbol;Acc:5993]	3	N	Y	N
ENSG00000115657	Tier 1	ABCB6	2	220074490	220083712	-1	ATP-binding cassette, sub-family B (MDR/TAP), member 6 [Source:HGNC Symbol;Acc:47]	0	N	N	Y
ENSG00000115661	Tier 1	STK16	2	220110177	220115059	1	serine/threonine kinase 16 [Source:HGNC Symbol;Acc:11394]	0	Y	N	N
ENSG00000115694	Tier 1	STK25	2	242432089	242449145	-1	serine/threonine kinase 25 [Source:HGNC Symbol;Acc:11404]	3	Y	N	N
ENSG00000115705	Tier 1	TPO	2	1377995	1547483	1	thyroid peroxidase [Source:HGNC Symbol;Acc:12015]	3	Y	N	N
ENSG00000115758	Tier 1	ODC1	2	10580094	10588630	-1	ornithine decarboxylase 1 [Source:HGNC Symbol;Acc:8109]	0	Y	N	N
ENSG00000115825	Tier 1	PRKD3	2	37477645	37551951	-1	protein kinase D3 [Source:HGNC Symbol;Acc:9408]	0	Y	N	N
ENSG00000115884	Tier 1	SDC1	2	20400558	20425194	-1	syndecan 1 [Source:HGNC Symbol;Acc:10658]	0	N	Y	N
ENSG00000115977	Tier 1	AAK1	2	69688532	69901481	-1	AP2 associated kinase 1 [Source:HGNC Symbol;Acc:19679]	0	Y	N	N
ENSG00000116032	Tier 1	GRIN3B	19	1000418	1009731	1	glutamate receptor, ionotropic, N-methyl-D-aspartate 3B [Source:HGNC Symbol;Acc:16768]	1	Y	N	N
ENSG00000116106	Tier 1	EPHA4	2	222282747	222438922	-1	EPH receptor A4 [Source:HGNC Symbol;Acc:3388]	0	Y	N	N
ENSG00000116141	Tier 1	MARK1	1	220701568	220837803	1	MAP/microtubule affinity-regulating kinase 1 [Source:HGNC Symbol;Acc:6896]	0	Y	N	N
ENSG00000116157	Tier 1	GPX7	1	53068044	53074723	1	glutathione peroxidase 7 [Source:HGNC Symbol;Acc:4559]	0	N	N	Y
ENSG00000116329	Tier 1	OPRD1	1	29138654	29190208	1	opioid receptor, delta 1 [Source:HGNC Symbol;Acc:8153]	0	Y	N	N
ENSG00000116478	Tier 1	HDAC1	1	32757687	32799236	1	histone deacetylase 1 [Source:HGNC Symbol;Acc:4852]	0	Y	N	N
ENSG00000116711	Tier 1	PLA2G4A	1	186798085	186958113	1	phospholipase A2, group IVA (cytosolic, calcium-dependent) [Source:HGNC Symbol;Acc:9035]	0	Y	N	N
ENSG00000116783	Tier 1	TNNI3K	1	74663947	75010112	1	TNNI3 interacting kinase [Source:HGNC Symbol;Acc:19661]	5	Y	N	N
ENSG00000116824	Tier 1	CD2	1	117297007	117311850	1	CD2 molecule [Source:HGNC Symbol;Acc:1639]	0	N	Y	N
ENSG00000117013	Tier 1	KCNQ4	1	41249684	41306124	1	potassium voltage-gated channel, KQT-like subfamily, member 4 [Source:HGNC Symbol;Acc:6298]	0	Y	Y	N
ENSG00000117020	Tier 1	AKT3	1	243651535	244014381	-1	v-akt murine thymoma viral oncogene homolog 3 [Source:HGNC Symbol;Acc:393]	1	Y	N	N
ENSG00000117215	Tier 1	PLA2G2D	1	20438432	20446050	-1	phospholipase A2, group IID [Source:HGNC Symbol;Acc:9033]	0	Y	Y	N
ENSG00000117362	Tier 1	APH1A	1	150237804	150241980	-1	APH1A gamma secretase subunit [Source:HGNC Symbol;Acc:29509]	1	Y	N	N
ENSG00000117400	Tier 1	MPL	1	43803478	43818443	1	myeloproliferative leukemia virus oncogene [Source:HGNC Symbol;Acc:7217]	0	Y	Y	N
ENSG00000117448	Tier 1	AKR1A1	1	46016215	46035721	1	aldo-keto reductase family 1, member A1 (aldehyde reductase) [Source:HGNC Symbol;Acc:380]	2	Y	N	N
ENSG00000117480	Tier 1	FAAH	1	46859937	46879520	1	fatty acid amide hydrolase [Source:HGNC Symbol;Acc:3553]	0	Y	N	N
ENSG00000117507	Tier 1	FMO6P	1	171106879	171130707	1	flavin containing monooxygenase 6 pseudogene [Source:HGNC Symbol;Acc:24024]	0	N	N	Y
ENSG00000117525	Tier 1	F3	1	94994781	95007356	-1	coagulation factor III (thromboplastin, tissue factor) [Source:HGNC Symbol;Acc:3541]	0	Y	Y	N
ENSG00000117586	Tier 1	TNFSF4	1	173152873	173176452	-1	tumor necrosis factor (ligand) superfamily, member 4 [Source:HGNC Symbol;Acc:11934]	2	N	Y	N
ENSG00000117594	Tier 1	HSD11B1	1	209859510	209908295	1	hydroxysteroid (11-beta) dehydrogenase 1 [Source:HGNC Symbol;Acc:5208]	0	Y	N	Y
ENSG00000117601	Tier 1	SERPINC1	1	173872947	173886516	-1	serpin peptidase inhibitor, clade C (antithrombin), member 1 [Source:HGNC Symbol;Acc:775]	0	Y	Y	N
ENSG00000117650	Tier 1	NEK2	1	211836114	211848960	-1	NIMA-related kinase 2 [Source:HGNC Symbol;Acc:7745]	0	Y	N	N
ENSG00000117676	Tier 1	RPS6KA1	1	26856252	26901521	1	ribosomal protein S6 kinase, 90kDa, polypeptide 1 [Source:HGNC Symbol;Acc:10430]	0	Y	N	N
ENSG00000117971	Tier 1	CHRNB4	15	78916461	79020096	-1	cholinergic receptor, nicotinic, beta 4 (neuronal) [Source:HGNC Symbol;Acc:1964]	30	Y	N	N
ENSG00000117984	Tier 1	CTSD	11	1773982	1785222	-1	cathepsin D [Source:HGNC Symbol;Acc:2529]	0	Y	Y	N
ENSG00000118046	Tier 1	STK11	19	1189406	1228428	1	serine/threonine kinase 11 [Source:HGNC Symbol;Acc:11389]	0	Y	N	N
ENSG00000118058	Tier 1	KMT2A	11	118307205	118397539	1	lysine (K)-specific methyltransferase 2A [Source:HGNC Symbol;Acc:7132]	0	Y	N	N
ENSG00000118113	Tier 1	MMP8	11	102582526	102597781	-1	matrix metallopeptidase 8 (neutrophil collagenase) [Source:HGNC Symbol;Acc:7175]	1	Y	Y	N
ENSG00000118271	Tier 1	TTR	18	29171689	29178974	1	transthyretin [Source:HGNC Symbol;Acc:12405]	1	Y	Y	N
ENSG00000118298	Tier 1	CA14	1	150229554	150237478	1	carbonic anhydrase XIV [Source:HGNC Symbol;Acc:1372]	1	Y	N	N
ENSG00000118432	Tier 1	CNR1	6	88849583	88876078	-1	cannabinoid receptor 1 (brain) [Source:HGNC Symbol;Acc:2159]	0	Y	N	N
ENSG00000118514	Tier 1	ALDH8A1	6	135238528	135271260	-1	aldehyde dehydrogenase 8 family, member A1 [Source:HGNC Symbol;Acc:15471]	0	Y	N	Y
ENSG00000118523	Tier 1	CTGF	6	132269316	132272513	-1	connective tissue growth factor [Source:HGNC Symbol;Acc:2500]	0	N	Y	N
ENSG00000118777	Tier 1	ABCG2	4	89011416	89152474	-1	ATP-binding cassette, sub-family G (WHITE), member 2 [Source:HGNC Symbol;Acc:74]	13	Y	Y	Y
ENSG00000118785	Tier 1	SPP1	4	88896819	88904562	1	secreted phosphoprotein 1 [Source:HGNC Symbol;Acc:11255]	1	N	Y	N
ENSG00000118971	Tier 1	CCND2	12	4382938	4414516	1	cyclin D2 [Source:HGNC Symbol;Acc:1583]	0	Y	N	N
ENSG00000119004	Tier 1	CYP20A1	2	204103663	204163009	1	cytochrome P450, family 20, subfamily A, polypeptide 1 [Source:HGNC Symbol;Acc:20576]	6	Y	N	Y
ENSG00000119535	Tier 1	CSF3R	1	36931644	36948879	-1	colony stimulating factor 3 receptor (granulocyte) [Source:HGNC Symbol;Acc:2439]	0	N	Y	N
ENSG00000119630	Tier 1	PGF	14	75408537	75422487	-1	placental growth factor [Source:HGNC Symbol;Acc:8893]	0	N	Y	N
ENSG00000119699	Tier 1	TGFB3	14	76424442	76449334	-1	transforming growth factor, beta 3 [Source:HGNC Symbol;Acc:11769]	0	N	Y	N
ENSG00000119711	Tier 1	ALDH6A1	14	74523553	74551196	-1	aldehyde dehydrogenase 6 family, member A1 [Source:HGNC Symbol;Acc:7179]	0	Y	N	Y
ENSG00000119715	Tier 1	ESRRB	14	76776957	76968178	1	estrogen-related receptor beta [Source:HGNC Symbol;Acc:3473]	0	Y	N	N
ENSG00000119772	Tier 1	DNMT3A	2	25455845	25565459	-1	DNA (cytosine-5-)-methyltransferase 3 alpha [Source:HGNC Symbol;Acc:2978]	2	Y	N	N
ENSG00000119782	Tier 1	FKBP1B	2	24272571	24286551	1	FK506 binding protein 1B, 12.6 kDa [Source:HGNC Symbol;Acc:3712]	0	Y	N	N
ENSG00000119888	Tier 1	EPCAM	2	47572297	47614740	1	epithelial cell adhesion molecule [Source:HGNC Symbol;Acc:11529]	0	N	Y	N
ENSG00000120088	Tier 1	CRHR1	17	43699267	43913194	1	corticotropin releasing hormone receptor 1 [Source:HGNC Symbol;Acc:2357]	18	Y	Y	N
ENSG00000120156	Tier 1	TEK	9	27109139	27230173	1	TEK tyrosine kinase, endothelial [Source:HGNC Symbol;Acc:11724]	0	Y	Y	N
ENSG00000120217	Tier 1	CD274	9	5450503	5470566	1	CD274 molecule [Source:HGNC Symbol;Acc:17635]	0	N	Y	N
ENSG00000120235	Tier 1	IFNA6	9	21349834	21351377	-1	interferon, alpha 6 [Source:HGNC Symbol;Acc:5427]	0	N	Y	N
ENSG00000120242	Tier 1	IFNA8	9	21409146	21410184	1	interferon, alpha 8 [Source:HGNC Symbol;Acc:5429]	0	N	Y	N
ENSG00000120251	Tier 1	GRIA2	4	158125334	158287227	1	glutamate receptor, ionotropic, AMPA 2 [Source:HGNC Symbol;Acc:4572]	0	Y	Y	N
ENSG00000120659	Tier 1	TNFSF11	13	43136872	43182149	1	tumor necrosis factor (ligand) superfamily, member 11 [Source:HGNC Symbol;Acc:11926]	6	N	Y	N
ENSG00000120889	Tier 1	TNFRSF10B	8	22877646	22926692	-1	tumor necrosis factor receptor superfamily, member 10b [Source:HGNC Symbol;Acc:11905]	0	N	Y	N
ENSG00000120899	Tier 1	PTK2B	8	27168999	27316903	1	protein tyrosine kinase 2 beta [Source:HGNC Symbol;Acc:9612]	1	Y	N	N
ENSG00000120903	Tier 1	CHRNA2	8	27317279	27337400	-1	cholinergic receptor, nicotinic, alpha 2 (neuronal) [Source:HGNC Symbol;Acc:1956]	0	Y	Y	N
ENSG00000120907	Tier 1	ADRA1A	8	26605667	26724790	-1	adrenoceptor alpha 1A [Source:HGNC Symbol;Acc:277]	1	Y	Y	N
ENSG00000120915	Tier 1	EPHX2	8	27348296	27403081	1	epoxide hydrolase 2, cytoplasmic [Source:HGNC Symbol;Acc:3402]	0	Y	N	Y
ENSG00000120949	Tier 1	TNFRSF8	1	12123434	12204264	1	tumor necrosis factor receptor superfamily, member 8 [Source:HGNC Symbol;Acc:11923]	0	N	Y	N
ENSG00000121270	Tier 1	ABCC11	16	48200821	48281479	-1	ATP-binding cassette, sub-family C (CFTR/MRP), member 11 [Source:HGNC Symbol;Acc:14639]	0	Y	N	Y
ENSG00000121351	Tier 1	IAPP	12	21507893	21532912	1	islet amyloid polypeptide [Source:HGNC Symbol;Acc:5329]	0	N	Y	Y
ENSG00000121361	Tier 1	KCNJ8	12	21917889	21928515	-1	potassium inwardly-rectifying channel, subfamily J, member 8 [Source:HGNC Symbol;Acc:6269]	0	Y	Y	N
ENSG00000121594	Tier 1	CD80	3	119243140	119278449	-1	CD80 molecule [Source:HGNC Symbol;Acc:1700]	6	N	Y	N
ENSG00000121691	Tier 1	CAT	11	34460472	34493609	1	catalase [Source:HGNC Symbol;Acc:1516]	0	N	N	Y
ENSG00000121764	Tier 1	HCRTR1	1	32083287	32098119	1	hypocretin (orexin) receptor 1 [Source:HGNC Symbol;Acc:4848]	0	Y	Y	N
ENSG00000121807	Tier 1	CCR2	3	46395225	46402419	1	chemokine (C-C motif) receptor 2 [Source:HGNC Symbol;Acc:1603]	3	Y	Y	N
ENSG00000121853	Tier 1	GHSR	3	172162923	172166246	-1	growth hormone secretagogue receptor [Source:HGNC Symbol;Acc:4267]	2	Y	Y	N
ENSG00000121879	Tier 1	PIK3CA	3	178865902	178957881	1	phosphatidylinositol-4,5-bisphosphate 3-kinase, catalytic subunit alpha [Source:HGNC Symbol;Acc:8975]	0	Y	N	N
ENSG00000121933	Tier 1	ADORA3	1	112025970	112106584	-1	adenosine A3 receptor [Source:HGNC Symbol;Acc:268]	0	Y	Y	N
ENSG00000121966	Tier 1	CXCR4	2	136871919	136875735	-1	chemokine (C-X-C motif) receptor 4 [Source:HGNC Symbol;Acc:2561]	0	Y	Y	N
ENSG00000122025	Tier 1	FLT3	13	28577411	28674729	-1	fms-related tyrosine kinase 3 [Source:HGNC Symbol;Acc:3765]	0	Y	Y	N
ENSG00000122194	Tier 1	PLG	6	161123270	161174347	1	plasminogen [Source:HGNC Symbol;Acc:9071]	11	Y	Y	N
ENSG00000122420	Tier 1	PTGFR	1	78769568	79005434	1	prostaglandin F receptor (FP) [Source:HGNC Symbol;Acc:9600]	0	Y	Y	N
ENSG00000122641	Tier 1	INHBA	7	41724712	41742706	-1	inhibin, beta A [Source:HGNC Symbol;Acc:6066]	0	N	Y	N
ENSG00000122863	Tier 1	CHST3	10	73724123	73773322	1	carbohydrate (chondroitin 6) sulfotransferase 3 [Source:HGNC Symbol;Acc:1971]	1	N	N	Y
ENSG00000122966	Tier 1	CIT	12	120123595	120315095	-1	citron (rho-interacting, serine/threonine kinase 21) [Source:HGNC Symbol;Acc:1985]	1	Y	N	N
ENSG00000123143	Tier 1	PKN1	19	14543865	14582679	1	protein kinase N1 [Source:HGNC Symbol;Acc:9405]	0	Y	N	N
ENSG00000123179	Tier 1	EBPL	13	50234859	50265611	-1	emopamil binding protein-like [Source:HGNC Symbol;Acc:18061]	0	Y	N	N
ENSG00000123191	Tier 1	ATP7B	13	52506809	52585630	-1	ATPase, Cu++ transporting, beta polypeptide [Source:HGNC Symbol;Acc:870]	0	N	N	Y
ENSG00000123201	Tier 1	GUCY1B2	13	51568647	51654998	-1	guanylate cyclase 1, soluble, beta 2 (pseudogene) [Source:HGNC Symbol;Acc:4686]	0	Y	N	N
ENSG00000123374	Tier 1	CDK2	12	56360553	56366568	1	cyclin-dependent kinase 2 [Source:HGNC Symbol;Acc:1771]	4	Y	N	N
ENSG00000123505	Tier 1	AMD1	6	111195973	111216916	1	adenosylmethionine decarboxylase 1 [Source:HGNC Symbol;Acc:457]	0	Y	N	N
ENSG00000123561	Tier 1	SERPINA7	X	105277197	105282729	-1	serpin peptidase inhibitor, clade A (alpha-1 antiproteinase, antitrypsin), member 7 [Source:HGNC Symbol;Acc:11583]	0	N	Y	Y
ENSG00000123595	Tier 1	RAB9A	X	13707244	13728625	1	RAB9A, member RAS oncogene family [Source:HGNC Symbol;Acc:9792]	0	Y	N	N
ENSG00000124089	Tier 1	MC3R	20	54823788	54824871	1	melanocortin 3 receptor [Source:HGNC Symbol;Acc:6931]	0	Y	Y	N
ENSG00000124302	Tier 1	CHST8	19	34112861	34264414	1	carbohydrate (N-acetylgalactosamine 4-0) sulfotransferase 8 [Source:HGNC Symbol;Acc:15993]	0	N	N	Y
ENSG00000124574	Tier 1	ABCC10	6	43395104	43418168	1	ATP-binding cassette, sub-family C (CFTR/MRP), member 10 [Source:HGNC Symbol;Acc:52]	0	Y	N	Y
ENSG00000124588	Tier 1	NQO2	6	2988221	3019996	1	NAD(P)H dehydrogenase, quinone 2 [Source:HGNC Symbol;Acc:7856]	0	Y	N	N
ENSG00000124610	Tier 1	HIST1H1A	6	26017260	26018040	-1	histone cluster 1, H1a [Source:HGNC Symbol;Acc:4715]	40	N	Y	N
ENSG00000124784	Tier 1	RIOK1	6	7389729	7418270	1	RIO kinase 1 [Source:HGNC Symbol;Acc:18656]	0	Y	N	N
ENSG00000124882	Tier 1	EREG	4	75230860	75254468	1	epiregulin [Source:HGNC Symbol;Acc:3443]	0	N	Y	N
ENSG00000125255	Tier 1	SLC10A2	13	103696350	103719196	-1	solute carrier family 10 (sodium/bile acid cotransporter), member 2 [Source:HGNC Symbol;Acc:10906]	0	Y	N	Y
ENSG00000125257	Tier 1	ABCC4	13	95672083	95953687	-1	ATP-binding cassette, sub-family C (CFTR/MRP), member 4 [Source:HGNC Symbol;Acc:55]	3	Y	N	Y
ENSG00000125384	Tier 1	PTGER2	14	52781023	52795324	1	prostaglandin E receptor 2 (subtype EP2), 53kDa [Source:HGNC Symbol;Acc:9594]	0	Y	N	N
ENSG00000125388	Tier 1	GRK4	4	2965335	3042474	1	G protein-coupled receptor kinase 4 [Source:HGNC Symbol;Acc:4543]	0	Y	N	N
ENSG00000125498	Tier 1	KIR2DL1	19	55281263	55295774	1	killer cell immunoglobulin-like receptor, two domains, long cytoplasmic tail, 1 [Source:HGNC Symbol;Acc:6329]	0	N	Y	N
ENSG00000125508	Tier 1	SRMS	20	62172163	62178857	-1	src-related kinase lacking C-terminal regulatory tyrosine and N-terminal myristylation sites [Source:HGNC Symbol;Acc:11298]	0	Y	N	N
ENSG00000125510	Tier 1	OPRL1	20	62711526	62731996	1	opiate receptor-like 1 [Source:HGNC Symbol;Acc:8155]	0	Y	Y	N
ENSG00000125538	Tier 1	IL1B	2	113587328	113594480	-1	interleukin 1, beta [Source:HGNC Symbol;Acc:5992]	0	N	Y	N
ENSG00000125551	Tier 1	PLGLB2	2	88047606	88058312	1	plasminogen-like B2 [Source:HGNC Symbol;Acc:9073]	0	N	Y	Y
ENSG00000125675	Tier 1	GRIA3	X	122318006	122624766	1	glutamate receptor, ionotropic, AMPA 3 [Source:HGNC Symbol;Acc:4573]	0	Y	Y	N
ENSG00000125726	Tier 1	CD70	19	6583194	6604114	-1	CD70 molecule [Source:HGNC Symbol;Acc:11937]	0	N	Y	N
ENSG00000125735	Tier 1	TNFSF14	19	6663148	6670599	-1	tumor necrosis factor (ligand) superfamily, member 14 [Source:HGNC Symbol;Acc:11930]	1	N	Y	N
ENSG00000125834	Tier 1	STK35	20	2082257	2157684	1	serine/threonine kinase 35 [Source:HGNC Symbol;Acc:16254]	0	Y	N	N
ENSG00000125910	Tier 1	S1PR4	19	3172344	3180329	1	sphingosine-1-phosphate receptor 4 [Source:HGNC Symbol;Acc:3170]	0	Y	Y	N
ENSG00000126067	Tier 1	PSMB2	1	36067185	36107445	-1	proteasome (prosome, macropain) subunit, beta type, 2 [Source:HGNC Symbol;Acc:9539]	1	Y	N	N
ENSG00000126218	Tier 1	F10	13	113777128	113803843	1	coagulation factor X [Source:HGNC Symbol;Acc:3528]	7	Y	Y	N
ENSG00000126266	Tier 1	FFAR1	19	35842445	35843367	1	free fatty acid receptor 1 [Source:HGNC Symbol;Acc:4498]	0	Y	N	N
ENSG00000126351	Tier 1	THRA	17	38214543	38250120	1	thyroid hormone receptor, alpha [Source:HGNC Symbol;Acc:11796]	7	Y	N	N
ENSG00000126583	Tier 1	PRKCG	19	54382444	54410906	1	protein kinase C, gamma [Source:HGNC Symbol;Acc:9402]	0	Y	N	N
ENSG00000126895	Tier 1	AVPR2	X	153167985	153172620	1	arginine vasopressin receptor 2 [Source:HGNC Symbol;Acc:897]	0	Y	Y	N
ENSG00000126934	Tier 1	MAP2K2	19	4090319	4124126	-1	mitogen-activated protein kinase kinase 2 [Source:HGNC Symbol;Acc:6842]	0	Y	N	N
ENSG00000127318	Tier 1	IL22	12	68642022	68647387	-1	interleukin 22 [Source:HGNC Symbol;Acc:14900]	0	N	Y	N
ENSG00000127334	Tier 1	DYRK2	12	68042118	68059186	1	dual-specificity tyrosine-(Y)-phosphorylation regulated kinase 2 [Source:HGNC Symbol;Acc:3093]	0	Y	N	N
ENSG00000127554	Tier 1	GFER	16	2034208	2037750	1	growth factor, augmenter of liver regeneration [Source:HGNC Symbol;Acc:4236]	0	Y	Y	N
ENSG00000127948	Tier 1	POR	7	75528518	75616173	1	P450 (cytochrome) oxidoreductase [Source:HGNC Symbol;Acc:9208]	2	N	N	Y
ENSG00000128039	Tier 1	SRD5A3	4	56212276	56239263	1	steroid 5 alpha-reductase 3 [Source:HGNC Symbol;Acc:25812]	0	Y	N	N
ENSG00000128052	Tier 1	KDR	4	55944644	55991756	-1	kinase insert domain receptor (a type III receptor tyrosine kinase) [Source:HGNC Symbol;Acc:6307]	0	Y	Y	N
ENSG00000128059	Tier 1	PPAT	4	57259528	57301781	-1	phosphoribosyl pyrophosphate amidotransferase [Source:HGNC Symbol;Acc:9238]	0	Y	N	N
ENSG00000128271	Tier 1	ADORA2A	22	24813847	24838328	1	adenosine A2a receptor [Source:HGNC Symbol;Acc:263]	0	Y	Y	N
ENSG00000128602	Tier 1	SMO	7	128828713	128853386	1	smoothened, frizzled family receptor [Source:HGNC Symbol;Acc:11119]	1	Y	N	N
ENSG00000128655	Tier 1	PDE11A	2	178487980	178973066	-1	phosphodiesterase 11A [Source:HGNC Symbol;Acc:8773]	1	Y	N	N
ENSG00000128829	Tier 1	EIF2AK4	15	40226347	40327797	1	eukaryotic translation initiation factor 2 alpha kinase 4 [Source:HGNC Symbol;Acc:19687]	0	Y	N	N
ENSG00000128917	Tier 1	DLL4	15	41221538	41231237	1	delta-like 4 (Drosophila) [Source:HGNC Symbol;Acc:2910]	0	N	Y	N
ENSG00000128918	Tier 1	ALDH1A2	15	58245622	58790065	-1	aldehyde dehydrogenase 1 family, member A2 [Source:HGNC Symbol;Acc:15472]	39	Y	N	Y
ENSG00000129214	Tier 1	SHBG	17	7517382	7536700	1	sex hormone-binding globulin [Source:HGNC Symbol;Acc:10839]	18	Y	Y	N
ENSG00000129315	Tier 1	CCNT1	12	49082247	49110681	-1	cyclin T1 [Source:HGNC Symbol;Acc:1599]	0	Y	N	N
ENSG00000129484	Tier 1	PARP2	14	20811741	20826064	1	poly (ADP-ribose) polymerase 2 [Source:HGNC Symbol;Acc:272]	0	Y	N	N
ENSG00000129521	Tier 1	EGLN3	14	34393437	34931980	-1	egl-9 family hypoxia-inducible factor 3 [Source:HGNC Symbol;Acc:14661]	0	Y	N	N
ENSG00000130304	Tier 1	SLC27A1	19	17579578	17616977	1	solute carrier family 27 (fatty acid transporter), member 1 [Source:HGNC Symbol;Acc:10995]	0	Y	N	Y
ENSG00000130413	Tier 1	STK33	11	8413418	8615836	-1	serine/threonine kinase 33 [Source:HGNC Symbol;Acc:14568]	4	Y	N	N
ENSG00000130540	Tier 1	SULT4A1	22	44220389	44258398	-1	sulfotransferase family 4A, member 1 [Source:HGNC Symbol;Acc:14903]	0	N	N	Y
ENSG00000130649	Tier 1	CYP2E1	10	135333910	135374724	1	cytochrome P450, family 2, subfamily E, polypeptide 1 [Source:HGNC Symbol;Acc:2631]	0	Y	N	Y
ENSG00000130669	Tier 1	PAK4	19	39616410	39673456	1	p21 protein (Cdc42/Rac)-activated kinase 4 [Source:HGNC Symbol;Acc:16059]	0	Y	N	N
ENSG00000130702	Tier 1	LAMA5	20	60883011	60942368	-1	laminin, alpha 5 [Source:HGNC Symbol;Acc:6485]	2	N	Y	N
ENSG00000130758	Tier 1	MAP3K10	19	40697651	40721482	1	mitogen-activated protein kinase kinase kinase 10 [Source:HGNC Symbol;Acc:6849]	0	Y	N	N
ENSG00000130816	Tier 1	DNMT1	19	10244021	10341962	-1	DNA (cytosine-5-)-methyltransferase 1 [Source:HGNC Symbol;Acc:2976]	0	Y	N	N
ENSG00000131023	Tier 1	LATS1	6	149979289	150039392	-1	large tumor suppressor kinase 1 [Source:HGNC Symbol;Acc:6514]	0	Y	N	N
ENSG00000131269	Tier 1	ABCB7	X	74273115	74376567	-1	ATP-binding cassette, sub-family B (MDR/TAP), member 7 [Source:HGNC Symbol;Acc:48]	0	N	N	Y
ENSG00000131389	Tier 1	SLC6A6	3	14444076	14530857	1	solute carrier family 6 (neurotransmitter transporter), member 6 [Source:HGNC Symbol;Acc:11052]	0	Y	N	Y
ENSG00000131471	Tier 1	AOC3	17	41003201	41010147	1	amine oxidase, copper containing 3 [Source:HGNC Symbol;Acc:550]	0	Y	Y	N
ENSG00000131686	Tier 1	CA6	1	9005926	9035151	1	carbonic anhydrase VI [Source:HGNC Symbol;Acc:1380]	0	Y	Y	N
ENSG00000131747	Tier 1	TOP2A	17	38544768	38574202	-1	topoisomerase (DNA) II alpha 170kDa [Source:HGNC Symbol;Acc:11989]	1	Y	N	N
ENSG00000131759	Tier 1	RARA	17	38465444	38513094	1	retinoic acid receptor, alpha [Source:HGNC Symbol;Acc:9864]	1	Y	N	N
ENSG00000131781	Tier 1	FMO5	1	146646930	146714700	-1	flavin containing monooxygenase 5 [Source:HGNC Symbol;Acc:3773]	0	N	N	Y
ENSG00000132155	Tier 1	RAF1	3	12625100	12705725	-1	v-raf-1 murine leukemia viral oncogene homolog 1 [Source:HGNC Symbol;Acc:9829]	2	Y	N	N
ENSG00000132170	Tier 1	PPARG	3	12328867	12475855	1	peroxisome proliferator-activated receptor gamma [Source:HGNC Symbol;Acc:9236]	2	Y	N	Y
ENSG00000132329	Tier 1	RAMP1	2	238767536	238820756	1	receptor (G protein-coupled) activity modifying protein 1 [Source:HGNC Symbol;Acc:9843]	0	Y	Y	N
ENSG00000132356	Tier 1	PRKAA1	5	40759481	40798476	-1	protein kinase, AMP-activated, alpha 1 catalytic subunit [Source:HGNC Symbol;Acc:9376]	1	Y	N	N
ENSG00000132437	Tier 1	DDC	7	50526134	50633154	-1	dopa decarboxylase (aromatic L-amino acid decarboxylase) [Source:HGNC Symbol;Acc:2719]	9	Y	N	N
ENSG00000132639	Tier 1	SNAP25	20	10199478	10288066	1	synaptosomal-associated protein, 25kDa [Source:HGNC Symbol;Acc:11132]	0	N	Y	N
ENSG00000132671	Tier 1	SSTR4	20	23016057	23017314	1	somatostatin receptor 4 [Source:HGNC Symbol;Acc:11333]	0	Y	Y	N
ENSG00000132681	Tier 1	ATP1A4	1	160121360	160156767	1	ATPase, Na+/K+ transporting, alpha 4 polypeptide [Source:HGNC Symbol;Acc:14073]	0	Y	N	N
ENSG00000132746	Tier 1	ALDH3B2	11	67429633	67448671	-1	aldehyde dehydrogenase 3 family, member B2 [Source:HGNC Symbol;Acc:411]	1	N	N	Y
ENSG00000132964	Tier 1	CDK8	13	26828276	26979375	1	cyclin-dependent kinase 8 [Source:HGNC Symbol;Acc:1779]	0	Y	N	N
ENSG00000132965	Tier 1	ALOX5AP	13	31309645	31338556	1	arachidonate 5-lipoxygenase-activating protein [Source:HGNC Symbol;Acc:436]	0	Y	N	N
ENSG00000133019	Tier 1	CHRM3	1	239549865	240078750	1	cholinergic receptor, muscarinic 3 [Source:HGNC Symbol;Acc:1952]	2	Y	Y	N
ENSG00000133059	Tier 1	DSTYK	1	205111632	205180727	-1	dual serine/threonine and tyrosine protein kinase [Source:HGNC Symbol;Acc:29043]	4	Y	N	N
ENSG00000133083	Tier 1	DCLK1	13	36345478	36705443	-1	doublecortin-like kinase 1 [Source:HGNC Symbol;Acc:2700]	1	Y	N	N
ENSG00000133101	Tier 1	CCNA1	13	37005967	37017019	1	cyclin A1 [Source:HGNC Symbol;Acc:1577]	0	Y	N	N
ENSG00000133216	Tier 1	EPHB2	1	23037332	23241818	1	EPH receptor B2 [Source:HGNC Symbol;Acc:3393]	0	Y	N	N
ENSG00000133433	Tier 1	GSTT2B	22	24299601	24303373	-1	glutathione S-transferase theta 2B (gene/pseudogene) [Source:HGNC Symbol;Acc:33437]	0	N	N	Y
ENSG00000133731	Tier 1	IMPA1	8	82570196	82598928	-1	inositol(myo)-1(or 4)-monophosphatase 1 [Source:HGNC Symbol;Acc:6050]	0	Y	N	N
ENSG00000133742	Tier 1	CA1	8	86239837	86291243	-1	carbonic anhydrase I [Source:HGNC Symbol;Acc:1368]	1	Y	N	N
ENSG00000134057	Tier 1	CCNB1	5	68462837	68474072	1	cyclin B1 [Source:HGNC Symbol;Acc:1579]	0	Y	N	N
ENSG00000134058	Tier 1	CDK7	5	68530668	68573250	1	cyclin-dependent kinase 7 [Source:HGNC Symbol;Acc:1778]	0	Y	N	N
ENSG00000134184	Tier 1	GSTM1	1	110230436	110251661	1	glutathione S-transferase mu 1 [Source:HGNC Symbol;Acc:4632]	0	N	N	Y
ENSG00000134201	Tier 1	GSTM5	1	110254864	110318050	1	glutathione S-transferase mu 5 [Source:HGNC Symbol;Acc:4637]	0	N	N	Y
ENSG00000134202	Tier 1	GSTM3	1	110276554	110284384	-1	glutathione S-transferase mu 3 (brain) [Source:HGNC Symbol;Acc:4635]	0	N	N	Y
ENSG00000134259	Tier 1	NGF	1	115828539	115880857	-1	nerve growth factor (beta polypeptide) [Source:HGNC Symbol;Acc:7808]	0	Y	Y	N
ENSG00000134318	Tier 1	ROCK2	2	11319887	11488456	-1	Rho-associated, coiled-coil containing protein kinase 2 [Source:HGNC Symbol;Acc:10252]	0	Y	N	N
ENSG00000134352	Tier 1	IL6ST	5	55230923	55290821	-1	interleukin 6 signal transducer (gp130, oncostatin M receptor) [Source:HGNC Symbol;Acc:6021]	0	N	Y	N
ENSG00000134460	Tier 1	IL2RA	10	6052652	6104288	-1	interleukin 2 receptor, alpha [Source:HGNC Symbol;Acc:6008]	16	N	Y	N
ENSG00000134489	Tier 1	HRH4	18	22040593	22059921	1	histamine receptor H4 [Source:HGNC Symbol;Acc:17383]	0	Y	Y	N
ENSG00000134538	Tier 1	SLCO1B1	12	21284136	21392180	1	solute carrier organic anion transporter family, member 1B1 [Source:HGNC Symbol;Acc:10959]	22	Y	N	Y
ENSG00000134602	Tier 1		X	131157293	131209971	1	Serine/threonine-protein kinase MST4 [Source:UniProtKB/Swiss-Prot;Acc:Q9P289]	0	Y	N	N
ENSG00000134640	Tier 1	MTNR1B	11	92702886	92718232	1	melatonin receptor 1B [Source:HGNC Symbol;Acc:7464]	20	Y	N	N
ENSG00000134716	Tier 1	CYP2J2	1	60358980	60392462	-1	cytochrome P450, family 2, subfamily J, polypeptide 2 [Source:HGNC Symbol;Acc:2634]	0	Y	N	Y
ENSG00000134780	Tier 1	DAGLA	11	61447905	61514473	1	diacylglycerol lipase, alpha [Source:HGNC Symbol;Acc:1165]	1	Y	N	N
ENSG00000134853	Tier 1	PDGFRA	4	55095264	55164414	1	platelet-derived growth factor receptor, alpha polypeptide [Source:HGNC Symbol;Acc:8803]	4	Y	Y	N
ENSG00000135047	Tier 1	CTSL	9	90340434	90346308	1	cathepsin L [Source:HGNC Symbol;Acc:2537]	0	Y	N	N
ENSG00000135090	Tier 1	TAOK3	12	118587606	118810750	-1	TAO kinase 3 [Source:HGNC Symbol;Acc:18133]	0	Y	N	N
ENSG00000135226	Tier 1	UGT2B28	4	70146217	70160768	1	UDP glucuronosyltransferase 2 family, polypeptide B28 [Source:HGNC Symbol;Acc:13479]	0	N	N	Y
ENSG00000135250	Tier 1	SRPK2	7	104751151	105039755	-1	SRSF protein kinase 2 [Source:HGNC Symbol;Acc:11306]	1	Y	N	N
ENSG00000135312	Tier 1	HTR1B	6	78171948	78173490	-1	5-hydroxytryptamine (serotonin) receptor 1B, G protein-coupled [Source:HGNC Symbol;Acc:5287]	0	Y	Y	N
ENSG00000135318	Tier 1	NT5E	6	86159809	86205500	1	5'-nucleotidase, ecto (CD73) [Source:HGNC Symbol;Acc:8021]	2	Y	Y	N
ENSG00000135333	Tier 1	EPHA7	6	93949738	94129265	-1	EPH receptor A7 [Source:HGNC Symbol;Acc:3390]	0	Y	N	N
ENSG00000135341	Tier 1	MAP3K7	6	91223292	91296764	-1	mitogen-activated protein kinase kinase kinase 7 [Source:HGNC Symbol;Acc:6859]	0	Y	N	N
ENSG00000135446	Tier 1	CDK4	12	58141510	58149796	-1	cyclin-dependent kinase 4 [Source:HGNC Symbol;Acc:1773]	2	Y	N	N
ENSG00000135503	Tier 1	ACVR1B	12	52345451	52390862	1	activin A receptor, type IB [Source:HGNC Symbol;Acc:172]	0	Y	N	N
ENSG00000135605	Tier 1	TEC	4	48137800	48271881	-1	tec protein tyrosine kinase [Source:HGNC Symbol;Acc:11719]	1	Y	N	N
ENSG00000135679	Tier 1	MDM2	12	69201956	69239214	1	MDM2 oncogene, E3 ubiquitin protein ligase [Source:HGNC Symbol;Acc:6973]	0	Y	N	N
ENSG00000135702	Tier 1	CHST5	16	75562433	75569145	-1	carbohydrate (N-acetylglucosamine 6-O) sulfotransferase 5 [Source:HGNC Symbol;Acc:1973]	0	N	N	Y
ENSG00000135766	Tier 1	EGLN1	1	231499497	231560790	-1	egl-9 family hypoxia-inducible factor 1 [Source:HGNC Symbol;Acc:1232]	0	Y	N	N
ENSG00000135821	Tier 1	GLUL	1	182350839	182361341	-1	glutamate-ammonia ligase [Source:HGNC Symbol;Acc:4341]	0	Y	N	N
ENSG00000135862	Tier 1	LAMC1	1	182992595	183114727	1	laminin, gamma 1 (formerly LAMB2) [Source:HGNC Symbol;Acc:6492]	0	N	Y	N
ENSG00000135902	Tier 1	CHRND	2	233390703	233401377	1	cholinergic receptor, nicotinic, delta (muscle) [Source:HGNC Symbol;Acc:1965]	2	Y	Y	N
ENSG00000135914	Tier 1	HTR2B	2	231972944	231989832	-1	5-hydroxytryptamine (serotonin) receptor 2B, G protein-coupled [Source:HGNC Symbol;Acc:5294]	0	Y	Y	N
ENSG00000135929	Tier 1	CYP27A1	2	219646472	219680016	1	cytochrome P450, family 27, subfamily A, polypeptide 1 [Source:HGNC Symbol;Acc:2605]	2	Y	N	Y
ENSG00000136160	Tier 1	EDNRB	13	78469616	78493903	-1	endothelin receptor type B [Source:HGNC Symbol;Acc:3180]	1	Y	Y	N
ENSG00000136213	Tier 1	CHST12	7	2443223	2474242	1	carbohydrate (chondroitin 4) sulfotransferase 12 [Source:HGNC Symbol;Acc:17423]	0	N	N	Y
ENSG00000136235	Tier 1	GPNMB	7	23275586	23314727	1	glycoprotein (transmembrane) nmb [Source:HGNC Symbol;Acc:4462]	1	N	Y	N
ENSG00000136244	Tier 1	IL6	7	22765503	22771621	1	interleukin 6 (interferon, beta 2) [Source:HGNC Symbol;Acc:6018]	0	N	Y	N
ENSG00000136531	Tier 1	SCN2A	2	166095912	166248818	1	sodium channel, voltage-gated, type II, alpha subunit [Source:HGNC Symbol;Acc:10588]	1	Y	N	N
ENSG00000136546	Tier 1	SCN7A	2	167260083	167350757	-1	sodium channel, voltage-gated, type VII, alpha subunit [Source:HGNC Symbol;Acc:10594]	0	Y	N	N
ENSG00000136573	Tier 1	BLK	8	11351510	11422113	1	B lymphoid tyrosine kinase [Source:HGNC Symbol;Acc:1057]	11	Y	N	N
ENSG00000136634	Tier 1	IL10	1	206940947	206945839	-1	interleukin 10 [Source:HGNC Symbol;Acc:5962]	10	N	Y	N
ENSG00000136807	Tier 1	CDK9	9	130547958	130553066	1	cyclin-dependent kinase 9 [Source:HGNC Symbol;Acc:1780]	0	Y	N	N
ENSG00000136875	Tier 1	PRPF4	9	116037623	116055185	1	pre-mRNA processing factor 4 [Source:HGNC Symbol;Acc:17349]	0	Y	N	N
ENSG00000136928	Tier 1	GABBR2	9	101050391	101471479	-1	gamma-aminobutyric acid (GABA) B receptor, 2 [Source:HGNC Symbol;Acc:4507]	1	Y	N	N
ENSG00000136943	Tier 1	CTSV	9	99794940	99801925	-1	cathepsin V [Source:HGNC Symbol;Acc:2538]	0	Y	N	N
ENSG00000137070	Tier 1	IL11RA	9	34650699	34661889	1	interleukin 11 receptor, alpha [Source:HGNC Symbol;Acc:5967]	0	N	Y	N
ENSG00000137124	Tier 1	ALDH1B1	9	38392661	38398658	1	aldehyde dehydrogenase 1 family, member B1 [Source:HGNC Symbol;Acc:407]	0	Y	N	Y
ENSG00000137193	Tier 1	PIM1	6	37137979	37143202	1	pim-1 oncogene [Source:HGNC Symbol;Acc:8986]	0	Y	N	N
ENSG00000137204	Tier 1	SLC22A7	6	43263432	43273276	1	solute carrier family 22 (organic anion transporter), member 7 [Source:HGNC Symbol;Acc:10971]	0	Y	N	Y
ENSG00000137252	Tier 1	HCRTR2	6	55039050	55147418	1	hypocretin (orexin) receptor 2 [Source:HGNC Symbol;Acc:4849]	0	Y	Y	N
ENSG00000137267	Tier 1	TUBB2A	6	3153903	3157760	-1	tubulin, beta 2A class IIa [Source:HGNC Symbol;Acc:12412]	0	Y	Y	N
ENSG00000137275	Tier 1	RIPK1	6	3064225	3115421	1	receptor (TNFRSF)-interacting serine-threonine kinase 1 [Source:HGNC Symbol;Acc:10019]	0	Y	N	N
ENSG00000137285	Tier 1	TUBB2B	6	3224495	3231964	-1	tubulin, beta 2B class IIb [Source:HGNC Symbol;Acc:30829]	0	Y	Y	N
ENSG00000137364	Tier 1	TPMT	6	18128542	18155305	-1	thiopurine S-methyltransferase [Source:HGNC Symbol;Acc:12014]	0	Y	N	Y
ENSG00000137491	Tier 1	SLCO2B1	11	74811608	74917594	1	solute carrier organic anion transporter family, member 2B1 [Source:HGNC Symbol;Acc:10962]	0	Y	N	Y
ENSG00000137509	Tier 1	PRCP	11	82534544	82681626	-1	prolylcarboxypeptidase (angiotensinase C) [Source:HGNC Symbol;Acc:9344]	0	Y	N	N
ENSG00000137571	Tier 1	SLCO5A1	8	70579282	70747299	-1	solute carrier organic anion transporter family, member 5A1 [Source:HGNC Symbol;Acc:19046]	0	N	N	Y
ENSG00000137573	Tier 1	SULF1	8	70378859	70573150	1	sulfatase 1 [Source:HGNC Symbol;Acc:20391]	0	N	Y	Y
ENSG00000137673	Tier 1	MMP7	11	102391239	102401484	-1	matrix metallopeptidase 7 (matrilysin, uterine) [Source:HGNC Symbol;Acc:7174]	1	Y	Y	N
ENSG00000137745	Tier 1	MMP13	11	102813724	102826463	-1	matrix metallopeptidase 13 (collagenase 3) [Source:HGNC Symbol;Acc:7159]	0	Y	Y	N
ENSG00000137752	Tier 1	CASP1	11	104896170	104972158	-1	caspase 1, apoptosis-related cysteine peptidase [Source:HGNC Symbol;Acc:1499]	0	Y	N	N
ENSG00000137764	Tier 1	MAP2K5	15	67835047	68099461	1	mitogen-activated protein kinase kinase 5 [Source:HGNC Symbol;Acc:6845]	7	Y	N	N
ENSG00000137843	Tier 1	PAK6	15	40509629	40569688	1	p21 protein (Cdc42/Rac)-activated kinase 6 [Source:HGNC Symbol;Acc:16061]	1	Y	N	N
ENSG00000137845	Tier 1	ADAM10	15	58887403	59042177	-1	ADAM metallopeptidase domain 10 [Source:HGNC Symbol;Acc:188]	0	Y	Y	N
ENSG00000137860	Tier 1	SLC28A2	15	45544428	45568149	1	solute carrier family 28 (concentrative nucleoside transporter), member 2 [Source:HGNC Symbol;Acc:11002]	4	N	N	Y
ENSG00000137869	Tier 1	CYP19A1	15	51500254	51630807	-1	cytochrome P450, family 19, subfamily A, polypeptide 1 [Source:HGNC Symbol;Acc:2594]	7	Y	N	Y
ENSG00000137975	Tier 1	CLCA2	1	86889769	86922241	1	chloride channel accessory 2 [Source:HGNC Symbol;Acc:2016]	0	Y	Y	N
ENSG00000138039	Tier 1	LHCGR	2	48859428	48982880	-1	luteinizing hormone/choriogonadotropin receptor [Source:HGNC Symbol;Acc:6585]	2	Y	Y	N
ENSG00000138061	Tier 1	CYP1B1	2	38294116	38337044	-1	cytochrome P450, family 1, subfamily B, polypeptide 1 [Source:HGNC Symbol;Acc:2597]	0	Y	N	Y
ENSG00000138074	Tier 1	SLC5A6	2	27422455	27435826	-1	solute carrier family 5 (sodium/multivitamin and iodide cotransporter), member 6 [Source:HGNC Symbol;Acc:11041]	1	N	N	Y
ENSG00000138109	Tier 1	CYP2C9	10	96698415	96749147	1	cytochrome P450, family 2, subfamily C, polypeptide 9 [Source:HGNC Symbol;Acc:2623]	12	Y	N	Y
ENSG00000138115	Tier 1	CYP2C8	10	96796530	96829254	-1	cytochrome P450, family 2, subfamily C, polypeptide 8 [Source:HGNC Symbol;Acc:2622]	8	Y	N	Y
ENSG00000138160	Tier 1	KIF11	10	94353043	94415150	1	kinesin family member 11 [Source:HGNC Symbol;Acc:6388]	10	Y	N	N
ENSG00000138356	Tier 1	AOX1	2	201450591	201541787	1	aldehyde oxidase 1 [Source:HGNC Symbol;Acc:553]	0	Y	N	Y
ENSG00000138379	Tier 1	MSTN	2	190920423	190927455	-1	myostatin [Source:HGNC Symbol;Acc:4223]	0	N	Y	N
ENSG00000138435	Tier 1	CHRNA1	2	175612320	175629200	-1	cholinergic receptor, nicotinic, alpha 1 (muscle) [Source:HGNC Symbol;Acc:1955]	0	Y	Y	N
ENSG00000138448	Tier 1	ITGAV	2	187454792	187545628	1	integrin, alpha V [Source:HGNC Symbol;Acc:6150]	0	Y	Y	N
ENSG00000138449	Tier 1	SLC40A1	2	190425305	190448484	-1	solute carrier family 40 (iron-regulated transporter), member 1 [Source:HGNC Symbol;Acc:10909]	0	N	Y	N
ENSG00000138613	Tier 1	APH1B	15	63568217	63601325	1	APH1B gamma secretase subunit [Source:HGNC Symbol;Acc:24080]	2	Y	N	N
ENSG00000138669	Tier 1	PRKG2	4	82009837	82136218	-1	protein kinase, cGMP-dependent, type II [Source:HGNC Symbol;Acc:9416]	4	Y	N	N
ENSG00000138685	Tier 1	FGF2	4	123747863	123819391	1	fibroblast growth factor 2 (basic) [Source:HGNC Symbol;Acc:3676]	0	Y	Y	N
ENSG00000138696	Tier 1	BMPR1B	4	95679119	96079599	1	bone morphogenetic protein receptor, type IB [Source:HGNC Symbol;Acc:1077]	0	Y	Y	N
ENSG00000138735	Tier 1	PDE5A	4	120415550	120550146	-1	phosphodiesterase 5A, cGMP-specific [Source:HGNC Symbol;Acc:8784]	0	Y	N	N
ENSG00000138756	Tier 1	BMP2K	4	79697496	79837526	1	BMP2 inducible kinase [Source:HGNC Symbol;Acc:18041]	0	Y	N	N
ENSG00000138769	Tier 1	CDKL2	4	76503215	76555900	-1	cyclin-dependent kinase-like 2 (CDC2-related kinase) [Source:HGNC Symbol;Acc:1782]	0	Y	N	N
ENSG00000138780	Tier 1	GSTCD	4	106629935	106768885	1	glutathione S-transferase, C-terminal domain containing [Source:HGNC Symbol;Acc:25806]	3	N	N	Y
ENSG00000138814	Tier 1	PPP3CA	4	101944566	102269435	-1	protein phosphatase 3, catalytic subunit, alpha isozyme [Source:HGNC Symbol;Acc:9314]	0	Y	N	N
ENSG00000138823	Tier 1	MTTP	4	100484918	100545156	1	microsomal triglyceride transfer protein [Source:HGNC Symbol;Acc:7467]	0	Y	N	N
ENSG00000139155	Tier 1	SLCO1C1	12	20848289	20906320	1	solute carrier organic anion transporter family, member 1C1 [Source:HGNC Symbol;Acc:13819]	1	N	N	Y
ENSG00000139567	Tier 1	ACVRL1	12	52300692	52317145	1	activin A receptor type II-like 1 [Source:HGNC Symbol;Acc:175]	0	Y	Y	N
ENSG00000139610	Tier 1	CELA1	12	51722227	51740463	-1	chymotrypsin-like elastase family, member 1 [Source:HGNC Symbol;Acc:3308]	0	Y	Y	N
ENSG00000139625	Tier 1	MAP3K12	12	53874274	53893847	-1	mitogen-activated protein kinase kinase kinase 12 [Source:HGNC Symbol;Acc:6851]	0	Y	N	N
ENSG00000139626	Tier 1	ITGB7	12	53585102	53601091	-1	integrin, beta 7 [Source:HGNC Symbol;Acc:6162]	0	Y	Y	N
ENSG00000139874	Tier 1	SSTR1	14	38677204	38682272	1	somatostatin receptor 1 [Source:HGNC Symbol;Acc:11330]	0	Y	Y	N
ENSG00000140009	Tier 1	ESR2	14	64550950	64804830	-1	estrogen receptor 2 (ER beta) [Source:HGNC Symbol;Acc:3468]	1	Y	N	N
ENSG00000140443	Tier 1	IGF1R	15	99192200	99507759	1	insulin-like growth factor 1 receptor [Source:HGNC Symbol;Acc:5465]	4	Y	Y	N
ENSG00000140459	Tier 1	CYP11A1	15	74630100	74660081	-1	cytochrome P450, family 11, subfamily A, polypeptide 1 [Source:HGNC Symbol;Acc:2590]	0	Y	N	Y
ENSG00000140465	Tier 1	CYP1A1	15	75011883	75017951	-1	cytochrome P450, family 1, subfamily A, polypeptide 1 [Source:HGNC Symbol;Acc:2595]	6	Y	N	Y
ENSG00000140474	Tier 1	ULK3	15	75128457	75135687	-1	unc-51 like kinase 3 [Source:HGNC Symbol;Acc:19703]	9	Y	N	N
ENSG00000140505	Tier 1	CYP1A2	15	75041185	75048543	1	cytochrome P450, family 1, subfamily A, polypeptide 2 [Source:HGNC Symbol;Acc:2596]	10	Y	N	Y
ENSG00000140538	Tier 1	NTRK3	15	88418230	88799999	-1	neurotrophic tyrosine kinase, receptor, type 3 [Source:HGNC Symbol;Acc:8033]	0	Y	Y	N
ENSG00000140675	Tier 1	SLC5A2	16	31494323	31502181	1	solute carrier family 5 (sodium/glucose cotransporter), member 2 [Source:HGNC Symbol;Acc:11037]	0	Y	N	N
ENSG00000140795	Tier 1	MYLK3	16	46740891	46824319	-1	myosin light chain kinase 3 [Source:HGNC Symbol;Acc:29826]	0	Y	N	N
ENSG00000140798	Tier 1	ABCC12	16	48116884	48189929	-1	ATP-binding cassette, sub-family C (CFTR/MRP), member 12 [Source:HGNC Symbol;Acc:14640]	0	Y	N	Y
ENSG00000140835	Tier 1	CHST4	16	71559136	71572649	1	carbohydrate (N-acetylglucosamine 6-O) sulfotransferase 4 [Source:HGNC Symbol;Acc:1972]	1	N	N	Y
ENSG00000140992	Tier 1	PDPK1	16	2587965	2653189	1	3-phosphoinositide dependent protein kinase-1 [Source:HGNC Symbol;Acc:8816]	0	Y	N	N
ENSG00000141458	Tier 1	NPC1	18	21086148	21166862	-1	Niemann-Pick disease, type C1 [Source:HGNC Symbol;Acc:7897]	0	Y	N	N
ENSG00000141503	Tier 1	MINK1	17	4736683	4801356	1	misshapen-like kinase 1 [Source:HGNC Symbol;Acc:17565]	1	Y	N	N
ENSG00000141510	Tier 1	TP53	17	7565097	7590856	-1	tumor protein p53 [Source:HGNC Symbol;Acc:11998]	6	Y	N	N
ENSG00000141551	Tier 1	CSNK1D	17	80196899	80231607	-1	casein kinase 1, delta [Source:HGNC Symbol;Acc:2452]	0	Y	N	N
ENSG00000141720	Tier 1	PIP4K2B	17	36921942	36956379	-1	phosphatidylinositol-5-phosphate 4-kinase, type II, beta [Source:HGNC Symbol;Acc:8998]	1	Y	N	N
ENSG00000141736	Tier 1	ERBB2	17	37844167	37886679	1	v-erb-b2 avian erythroblastic leukemia viral oncogene homolog 2 [Source:HGNC Symbol;Acc:3430]	3	Y	Y	N
ENSG00000141744	Tier 1	PNMT	17	37824234	37826728	1	phenylethanolamine N-methyltransferase [Source:HGNC Symbol;Acc:9160]	2	Y	N	Y
ENSG00000142002	Tier 1	DPP9	19	4675236	4724685	-1	dipeptidyl-peptidase 9 [Source:HGNC Symbol;Acc:18648]	1	Y	N	N
ENSG00000142166	Tier 1	IFNAR1	21	34696734	34732168	1	interferon (alpha, beta and omega) receptor 1 [Source:HGNC Symbol;Acc:5432]	1	N	Y	N
ENSG00000142168	Tier 1	SOD1	21	33031935	33041244	1	superoxide dismutase 1, soluble [Source:HGNC Symbol;Acc:11179]	0	N	Y	Y
ENSG00000142178	Tier 1	SIK1	21	44834395	44847008	-1	salt-inducible kinase 1 [Source:HGNC Symbol;Acc:11142]	0	Y	N	N
ENSG00000142192	Tier 1	APP	21	27252861	27543446	-1	amyloid beta (A4) precursor protein [Source:HGNC Symbol;Acc:620]	0	Y	Y	N
ENSG00000142208	Tier 1	AKT1	14	105235686	105262088	-1	v-akt murine thymoma viral oncogene homolog 1 [Source:HGNC Symbol;Acc:391]	1	Y	N	N
ENSG00000142319	Tier 1	SLC6A3	5	1392909	1445545	-1	solute carrier family 6 (neurotransmitter transporter), member 3 [Source:HGNC Symbol;Acc:11049]	0	Y	N	N
ENSG00000142494	Tier 1	SLC47A1	17	19398698	19482347	1	solute carrier family 47 (multidrug and toxin extrusion), member 1 [Source:HGNC Symbol;Acc:25588]	0	Y	N	Y
ENSG00000142583	Tier 1	SLC2A5	1	9095166	9148537	-1	solute carrier family 2 (facilitated glucose/fructose transporter), member 5 [Source:HGNC Symbol;Acc:11010]	0	N	N	Y
ENSG00000142627	Tier 1	EPHA2	1	16450832	16482582	-1	EPH receptor A2 [Source:HGNC Symbol;Acc:3386]	2	Y	N	N
ENSG00000142731	Tier 1	PLK4	4	128802016	128820350	1	polo-like kinase 4 [Source:HGNC Symbol;Acc:11397]	0	Y	N	N
ENSG00000142973	Tier 1	CYP4B1	1	47223510	47285085	1	cytochrome P450, family 4, subfamily B, polypeptide 1 [Source:HGNC Symbol;Acc:2644]	5	Y	N	Y
ENSG00000143149	Tier 1	ALDH9A1	1	165631453	165668100	-1	aldehyde dehydrogenase 9 family, member A1 [Source:HGNC Symbol;Acc:412]	0	Y	N	Y
ENSG00000143167	Tier 1	GPA33	1	167022073	167059868	-1	glycoprotein A33 (transmembrane) [Source:HGNC Symbol;Acc:4445]	0	N	Y	N
ENSG00000143171	Tier 1	RXRG	1	165370159	165414433	-1	retinoid X receptor, gamma [Source:HGNC Symbol;Acc:10479]	2	Y	N	N
ENSG00000143198	Tier 1	MGST3	1	165600098	165631033	1	microsomal glutathione S-transferase 3 [Source:HGNC Symbol;Acc:7064]	0	N	N	Y
ENSG00000143217	Tier 1	PVRL4	1	161040785	161059389	-1	poliovirus receptor-related 4 [Source:HGNC Symbol;Acc:19688]	0	N	Y	N
ENSG00000143257	Tier 1	NR1I3	1	161199456	161208092	-1	nuclear receptor subfamily 1, group I, member 3 [Source:HGNC Symbol;Acc:7969]	1	Y	N	Y
ENSG00000143322	Tier 1	ABL2	1	179068462	179198819	-1	c-abl oncogene 2, non-receptor tyrosine kinase [Source:HGNC Symbol;Acc:77]	0	Y	N	N
ENSG00000143365	Tier 1	RORC	1	151778547	151804348	-1	RAR-related orphan receptor C [Source:HGNC Symbol;Acc:10260]	1	Y	N	N
ENSG00000143387	Tier 1	CTSK	1	150768684	150780799	-1	cathepsin K [Source:HGNC Symbol;Acc:2536]	5	Y	N	N
ENSG00000143398	Tier 1	PIP5K1A	1	151170425	151222012	1	phosphatidylinositol-4-phosphate 5-kinase, type I, alpha [Source:HGNC Symbol;Acc:8994]	0	Y	N	N
ENSG00000143437	Tier 1	ARNT	1	150782181	150849244	-1	aryl hydrocarbon receptor nuclear translocator [Source:HGNC Symbol;Acc:700]	5	N	N	Y
ENSG00000143466	Tier 1	IKBKE	1	206643791	206670223	1	inhibitor of kappa light polypeptide gene enhancer in B-cells, kinase epsilon [Source:HGNC Symbol;Acc:14552]	0	Y	N	N
ENSG00000143498	Tier 1	TAF1A	1	222731244	222763275	-1	TATA box binding protein (TBP)-associated factor, RNA polymerase I, A, 48kDa [Source:HGNC Symbol;Acc:11532]	0	Y	N	N
ENSG00000143799	Tier 1	PARP1	1	226548392	226595780	-1	poly (ADP-ribose) polymerase 1 [Source:HGNC Symbol;Acc:270]	0	Y	N	N
ENSG00000143801	Tier 1	PSEN2	1	227057885	227083806	1	presenilin 2 (Alzheimer disease 4) [Source:HGNC Symbol;Acc:9509]	0	Y	N	N
ENSG00000143819	Tier 1	EPHX1	1	225997794	226033260	1	epoxide hydrolase 1, microsomal (xenobiotic) [Source:HGNC Symbol;Acc:3401]	0	N	N	Y
ENSG00000143839	Tier 1	REN	1	204123944	204135465	-1	renin [Source:HGNC Symbol;Acc:9958]	0	Y	Y	N
ENSG00000143851	Tier 1	PTPN7	1	202116141	202130716	-1	protein tyrosine phosphatase, non-receptor type 7 [Source:HGNC Symbol;Acc:9659]	0	Y	N	N
ENSG00000144230	Tier 1	GPR17	2	128403439	128410213	1	G protein-coupled receptor 17 [Source:HGNC Symbol;Acc:4471]	0	Y	Y	N
ENSG00000144285	Tier 1	SCN1A	2	166845670	166984523	-1	sodium channel, voltage-gated, type I, alpha subunit [Source:HGNC Symbol;Acc:10585]	6	Y	N	N
ENSG00000144481	Tier 1	TRPM8	2	234826043	234928166	1	transient receptor potential cation channel, subfamily M, member 8 [Source:HGNC Symbol;Acc:17961]	6	Y	N	N
ENSG00000144671	Tier 1	SLC22A14	3	38323785	38360066	1	solute carrier family 22, member 14 [Source:HGNC Symbol;Acc:8495]	0	Y	N	Y
ENSG00000144852	Tier 1	NR1I2	3	119499331	119537332	1	nuclear receptor subfamily 1, group I, member 2 [Source:HGNC Symbol;Acc:7968]	1	Y	N	Y
ENSG00000144891	Tier 1	AGTR1	3	148415571	148460795	1	angiotensin II receptor, type 1 [Source:HGNC Symbol;Acc:336]	0	Y	Y	N
ENSG00000145242	Tier 1	EPHA5	4	66185281	66536213	-1	EPH receptor A5 [Source:HGNC Symbol;Acc:3389]	0	Y	Y	N
ENSG00000145321	Tier 1	GC	4	72607410	72669758	-1	group-specific component (vitamin D binding protein) [Source:HGNC Symbol;Acc:4187]	8	Y	Y	N
ENSG00000145349	Tier 1	CAMK2D	4	114372188	114683083	-1	calcium/calmodulin-dependent protein kinase II delta [Source:HGNC Symbol;Acc:1462]	1	Y	N	N
ENSG00000145386	Tier 1	CCNA2	4	122737599	122745087	-1	cyclin A2 [Source:HGNC Symbol;Acc:1578]	0	Y	N	N
ENSG00000145545	Tier 1	SRD5A1	5	6633456	6669675	1	steroid-5-alpha-reductase, alpha polypeptide 1 (3-oxo-5 alpha-steroid delta 4-dehydrogenase alpha 1) [Source:HGNC Symbol;Acc:11284]	0	Y	N	N
ENSG00000145777	Tier 1	TSLP	5	110405760	110413722	1	thymic stromal lymphopoietin [Source:HGNC Symbol;Acc:30743]	5	N	Y	N
ENSG00000145839	Tier 1	IL9	5	135227935	135231516	-1	interleukin 9 [Source:HGNC Symbol;Acc:6029]	0	N	Y	N
ENSG00000145863	Tier 1	GABRA6	5	160974069	161129599	1	gamma-aminobutyric acid (GABA) A receptor, alpha 6 [Source:HGNC Symbol;Acc:4080]	0	Y	Y	N
ENSG00000145864	Tier 1	GABRB2	5	160715436	160976050	-1	gamma-aminobutyric acid (GABA) A receptor, beta 2 [Source:HGNC Symbol;Acc:4082]	0	Y	Y	N
ENSG00000145888	Tier 1	GLRA1	5	151202074	151304403	-1	glycine receptor, alpha 1 [Source:HGNC Symbol;Acc:4326]	0	Y	Y	N
ENSG00000145949	Tier 1	MYLK4	6	2663863	2751200	-1	myosin light chain kinase family, member 4 [Source:HGNC Symbol;Acc:27972]	0	Y	N	N
ENSG00000146070	Tier 1	PLA2G7	6	46671938	46703430	-1	phospholipase A2, group VII (platelet-activating factor acetylhydrolase, plasma) [Source:HGNC Symbol;Acc:9040]	4	Y	Y	N
ENSG00000146233	Tier 1	CYP39A1	6	46517541	46620523	-1	cytochrome P450, family 39, subfamily A, polypeptide 1 [Source:HGNC Symbol;Acc:17449]	4	N	N	Y
ENSG00000146242	Tier 1	TPBG	6	83072923	83080545	1	trophoblast glycoprotein [Source:HGNC Symbol;Acc:12004]	0	Y	Y	N
ENSG00000146399	Tier 1	TAAR1	6	132966123	132967142	-1	trace amine associated receptor 1 [Source:HGNC Symbol;Acc:17734]	0	Y	Y	N
ENSG00000146477	Tier 1	SLC22A3	6	160769300	160876014	1	solute carrier family 22 (organic cation transporter), member 3 [Source:HGNC Symbol;Acc:10967]	10	Y	N	Y
ENSG00000146648	Tier 1	EGFR	7	55086714	55324313	1	epidermal growth factor receptor [Source:HGNC Symbol;Acc:3236]	0	Y	Y	N
ENSG00000146872	Tier 1	TLK2	17	60536019	60692842	1	tousled-like kinase 2 [Source:HGNC Symbol;Acc:11842]	0	Y	N	N
ENSG00000146904	Tier 1	EPHA1	7	143087382	143105985	-1	EPH receptor A1 [Source:HGNC Symbol;Acc:3385]	1	Y	N	N
ENSG00000147082	Tier 1	CCNB3	X	49967364	50094909	1	cyclin B3 [Source:HGNC Symbol;Acc:18709]	0	Y	N	N
ENSG00000147099	Tier 1	HDAC8	X	71549366	71792953	-1	histone deacetylase 8 [Source:HGNC Symbol;Acc:13315]	0	Y	N	N
ENSG00000147119	Tier 1	CHST7	X	46433219	46457843	1	carbohydrate (N-acetylglucosamine 6-O) sulfotransferase 7 [Source:HGNC Symbol;Acc:13817]	0	N	N	Y
ENSG00000147155	Tier 1	EBP	X	48379546	48387104	1	emopamil binding protein (sterol isomerase) [Source:HGNC Symbol;Acc:3133]	0	Y	N	N
ENSG00000147246	Tier 1	HTR2C	X	113818551	114144624	1	5-hydroxytryptamine (serotonin) receptor 2C, G protein-coupled [Source:HGNC Symbol;Acc:5295]	0	Y	Y	N
ENSG00000147257	Tier 1	GPC3	X	132669773	133119922	-1	glypican 3 [Source:HGNC Symbol;Acc:4451]	0	N	Y	N
ENSG00000147576	Tier 1	ADHFE1	8	67342420	67383836	1	alcohol dehydrogenase, iron containing, 1 [Source:HGNC Symbol;Acc:16354]	2	N	N	Y
ENSG00000147873	Tier 1	IFNA5	9	21304613	21305312	-1	interferon, alpha 5 [Source:HGNC Symbol;Acc:5426]	0	N	Y	N
ENSG00000147955	Tier 1	SIGMAR1	9	34634719	34637806	-1	sigma non-opioid intracellular receptor 1 [Source:HGNC Symbol;Acc:8157]	0	Y	N	N
ENSG00000148053	Tier 1	NTRK2	9	87283466	87638505	1	neurotrophic tyrosine kinase, receptor, type 2 [Source:HGNC Symbol;Acc:8032]	0	Y	Y	N
ENSG00000148154	Tier 1	UGCG	9	114659046	114697649	1	UDP-glucose ceramide glucosyltransferase [Source:HGNC Symbol;Acc:12524]	0	Y	N	N
ENSG00000148344	Tier 1	PTGES	9	132500610	132515326	-1	prostaglandin E synthase [Source:HGNC Symbol;Acc:9599]	0	Y	N	N
ENSG00000148400	Tier 1	NOTCH1	9	139388896	139440314	-1	notch 1 [Source:HGNC Symbol;Acc:7881]	0	Y	Y	N
ENSG00000148408	Tier 1	CACNA1B	9	140772241	141019076	1	calcium channel, voltage-dependent, N type, alpha 1B subunit [Source:HGNC Symbol;Acc:1389]	0	Y	Y	N
ENSG00000148660	Tier 1	CAMK2G	10	75572259	75634343	-1	calcium/calmodulin-dependent protein kinase II gamma [Source:HGNC Symbol;Acc:1463]	2	Y	N	N
ENSG00000148680	Tier 1	HTR7	10	92500578	92617671	-1	5-hydroxytryptamine (serotonin) receptor 7, adenylate cyclase-coupled [Source:HGNC Symbol;Acc:5302]	1	Y	Y	N
ENSG00000148795	Tier 1	CYP17A1	10	104590288	104597290	-1	cytochrome P450, family 17, subfamily A, polypeptide 1 [Source:HGNC Symbol;Acc:2593]	24	Y	N	Y
ENSG00000148834	Tier 1	GSTO1	10	105995114	106027217	1	glutathione S-transferase omega 1 [Source:HGNC Symbol;Acc:13312]	1	N	N	Y
ENSG00000148848	Tier 1	ADAM12	10	127700950	128077024	-1	ADAM metallopeptidase domain 12 [Source:HGNC Symbol;Acc:190]	0	Y	Y	N
ENSG00000149269	Tier 1	PAK1	11	77032752	77185680	-1	p21 protein (Cdc42/Rac)-activated kinase 1 [Source:HGNC Symbol;Acc:8590]	0	Y	N	N
ENSG00000149294	Tier 1	NCAM1	11	112831997	113149158	1	neural cell adhesion molecule 1 [Source:HGNC Symbol;Acc:7656]	1	N	Y	N
ENSG00000149295	Tier 1	DRD2	11	113280318	113346413	-1	dopamine receptor D2 [Source:HGNC Symbol;Acc:3023]	1	Y	Y	N
ENSG00000149305	Tier 1	HTR3B	11	113775399	113817287	1	5-hydroxytryptamine (serotonin) receptor 3B, ionotropic [Source:HGNC Symbol;Acc:5298]	1	Y	N	N
ENSG00000149403	Tier 1	GRIK4	11	120382468	120859613	1	glutamate receptor, ionotropic, kainate 4 [Source:HGNC Symbol;Acc:4582]	0	Y	N	N
ENSG00000149452	Tier 1	SLC22A8	11	62756626	62783311	-1	solute carrier family 22 (organic anion transporter), member 8 [Source:HGNC Symbol;Acc:10972]	0	Y	N	Y
ENSG00000149554	Tier 1	CHEK1	11	125495036	125546150	1	checkpoint kinase 1 [Source:HGNC Symbol;Acc:1925]	0	Y	N	N
ENSG00000149742	Tier 1	SLC22A9	11	63137261	63177766	1	solute carrier family 22 (organic anion transporter), member 9 [Source:HGNC Symbol;Acc:16261]	0	Y	N	Y
ENSG00000149968	Tier 1	MMP3	11	102706532	102714534	-1	matrix metallopeptidase 3 (stromelysin 1, progelatinase) [Source:HGNC Symbol;Acc:7173]	7	Y	Y	N
ENSG00000150093	Tier 1	ITGB1	10	33189247	33294720	-1	integrin, beta 1 (fibronectin receptor, beta polypeptide, antigen CD29 includes MDF2, MSK12) [Source:HGNC Symbol;Acc:6153]	0	Y	Y	N
ENSG00000150337	Tier 1	FCGR1A	1	149754227	149764074	1	Fc fragment of IgG, high affinity Ia, receptor (CD64) [Source:HGNC Symbol;Acc:3613]	0	N	Y	N
ENSG00000150457	Tier 1	LATS2	13	21547171	21635686	-1	large tumor suppressor kinase 2 [Source:HGNC Symbol;Acc:6515]	0	Y	N	N
ENSG00000150540	Tier 1	HNMT	2	138721590	138773930	1	histamine N-methyltransferase [Source:HGNC Symbol;Acc:5028]	0	Y	N	Y
ENSG00000150593	Tier 1	PDCD4	10	112631565	112659764	1	programmed cell death 4 (neoplastic transformation inhibitor) [Source:HGNC Symbol;Acc:8763]	0	Y	N	N
ENSG00000150594	Tier 1	ADRA2A	10	112836790	112840658	1	adrenoceptor alpha 2A [Source:HGNC Symbol;Acc:281]	0	Y	Y	N
ENSG00000150782	Tier 1	IL18	11	112013974	112034840	-1	interleukin 18 (interferon-gamma-inducing factor) [Source:HGNC Symbol;Acc:5986]	5	N	Y	N
ENSG00000151067	Tier 1	CACNA1C	12	2079952	2802108	1	calcium channel, voltage-dependent, L type, alpha 1C subunit [Source:HGNC Symbol;Acc:1390]	7	Y	N	N
ENSG00000151090	Tier 1	THRB	3	24158651	24536773	-1	thyroid hormone receptor, beta [Source:HGNC Symbol;Acc:11799]	3	Y	N	N
ENSG00000151224	Tier 1	MAT1A	10	82031576	82049440	-1	methionine adenosyltransferase I, alpha [Source:HGNC Symbol;Acc:6903]	0	N	N	Y
ENSG00000151247	Tier 1	EIF4E	4	99792835	99851788	-1	eukaryotic translation initiation factor 4E [Source:HGNC Symbol;Acc:3287]	0	Y	N	N
ENSG00000151422	Tier 1	FER	5	108083523	108532542	1	fer (fps/fes related) tyrosine kinase [Source:HGNC Symbol;Acc:3655]	1	Y	N	N
ENSG00000151577	Tier 1	DRD3	3	113847499	113918254	-1	dopamine receptor D3 [Source:HGNC Symbol;Acc:3024]	0	Y	Y	N
ENSG00000151617	Tier 1	EDNRA	4	148402069	148466106	1	endothelin receptor type A [Source:HGNC Symbol;Acc:3179]	2	Y	Y	N
ENSG00000151623	Tier 1	NR3C2	4	148999913	149365850	-1	nuclear receptor subfamily 3, group C, member 2 [Source:HGNC Symbol;Acc:7979]	1	Y	N	N
ENSG00000151665	Tier 1	PIGF	2	46808076	46844258	-1	phosphatidylinositol glycan anchor biosynthesis, class F [Source:HGNC Symbol;Acc:8962]	0	N	Y	N
ENSG00000151694	Tier 1	ADAM17	2	9628615	9695921	-1	ADAM metallopeptidase domain 17 [Source:HGNC Symbol;Acc:195]	0	Y	Y	N
ENSG00000151834	Tier 1	GABRA2	4	46250444	46477247	-1	gamma-aminobutyric acid (GABA) A receptor, alpha 2 [Source:HGNC Symbol;Acc:4076]	0	Y	Y	N
ENSG00000152270	Tier 1	PDE3B	11	14665269	14892350	1	phosphodiesterase 3B, cGMP-inhibited [Source:HGNC Symbol;Acc:8779]	5	Y	N	Y
ENSG00000152578	Tier 1	GRIA4	11	105480721	105852819	1	glutamate receptor, ionotropic, AMPA 4 [Source:HGNC Symbol;Acc:4574]	1	Y	Y	N
ENSG00000152601	Tier 1	MBNL1	3	151961617	152183569	1	muscleblind-like splicing regulator 1 [Source:HGNC Symbol;Acc:6923]	0	Y	N	N
ENSG00000152822	Tier 1	GRM1	6	146348782	146758734	1	glutamate receptor, metabotropic 1 [Source:HGNC Symbol;Acc:4593]	0	Y	N	N
ENSG00000153208	Tier 1	MERTK	2	112656056	112787138	1	c-mer proto-oncogene tyrosine kinase [Source:HGNC Symbol;Acc:7027]	2	Y	Y	N
ENSG00000153253	Tier 1	SCN3A	2	165944032	166060577	-1	sodium channel, voltage-gated, type III, alpha subunit [Source:HGNC Symbol;Acc:10590]	0	Y	N	N
ENSG00000153923	Tier 1	CLCA3P	1	87099956	87121059	1	chloride channel accessory 3, pseudogene [Source:HGNC Symbol;Acc:2017]	0	Y	N	N
ENSG00000153956	Tier 1	CACNA2D1	7	81575760	82073114	-1	calcium channel, voltage-dependent, alpha 2/delta subunit 1 [Source:HGNC Symbol;Acc:1399]	0	Y	N	N
ENSG00000154080	Tier 1	CHST9	18	24495595	24765281	-1	carbohydrate (N-acetylgalactosamine 4-0) sulfotransferase 9 [Source:HGNC Symbol;Acc:19898]	1	N	Y	Y
ENSG00000154188	Tier 1	ANGPT1	8	108261721	108510283	-1	angiopoietin 1 [Source:HGNC Symbol;Acc:484]	0	N	Y	N
ENSG00000154229	Tier 1	PRKCA	17	64298754	64806861	1	protein kinase C, alpha [Source:HGNC Symbol;Acc:9393]	3	Y	N	N
ENSG00000154310	Tier 1	TNIK	3	170779128	171178197	-1	TRAF2 and NCK interacting kinase [Source:HGNC Symbol;Acc:30765]	0	Y	N	N
ENSG00000154928	Tier 1	EPHB1	3	134316643	134979309	1	EPH receptor B1 [Source:HGNC Symbol;Acc:3392]	0	Y	Y	N
ENSG00000155111	Tier 1	CDK19	6	110931181	111137161	-1	cyclin-dependent kinase 19 [Source:HGNC Symbol;Acc:19338]	0	Y	N	N
ENSG00000155380	Tier 1	SLC16A1	1	113454469	113499635	-1	solute carrier family 16 (monocarboxylate transporter), member 1 [Source:HGNC Symbol;Acc:10922]	0	Y	N	Y
ENSG00000155465	Tier 1	SLC7A7	14	23242431	23299029	-1	solute carrier family 7 (amino acid transporter light chain, y+L system), member 7 [Source:HGNC Symbol;Acc:11065]	0	N	N	Y
ENSG00000155511	Tier 1	GRIA1	5	152869175	153193429	1	glutamate receptor, ionotropic, AMPA 1 [Source:HGNC Symbol;Acc:4571]	1	Y	Y	N
ENSG00000156006	Tier 1	NAT2	8	18248755	18258728	1	N-acetyltransferase 2 (arylamine N-acetyltransferase) [Source:HGNC Symbol;Acc:7646]	13	N	N	Y
ENSG00000156096	Tier 1	UGT2B4	4	70345883	70391732	-1	UDP glucuronosyltransferase 2 family, polypeptide B4 [Source:HGNC Symbol;Acc:12553]	0	N	Y	Y
ENSG00000156103	Tier 1	MMP16	8	89044237	89340254	-1	matrix metallopeptidase 16 (membrane-inserted) [Source:HGNC Symbol;Acc:7162]	5	Y	Y	N
ENSG00000156222	Tier 1	SLC28A1	15	85427885	85518876	1	solute carrier family 28 (concentrative nucleoside transporter), member 1 [Source:HGNC Symbol;Acc:11001]	0	N	N	Y
ENSG00000156427	Tier 1	FGF18	5	170846660	170884627	1	fibroblast growth factor 18 [Source:HGNC Symbol;Acc:3674]	0	Y	Y	N
ENSG00000156711	Tier 1	MAPK13	6	36095586	36107842	1	mitogen-activated protein kinase 13 [Source:HGNC Symbol;Acc:6875]	0	Y	N	N
ENSG00000156738	Tier 1	MS4A1	11	60223225	60238233	1	membrane-spanning 4-domains, subfamily A, member 1 [Source:HGNC Symbol;Acc:7315]	0	N	Y	N
ENSG00000156873	Tier 1	PHKG2	16	30759591	30772490	1	phosphorylase kinase, gamma 2 (testis) [Source:HGNC Symbol;Acc:8931]	1	Y	N	N
ENSG00000157005	Tier 1	SST	3	187386694	187388187	-1	somatostatin [Source:HGNC Symbol;Acc:11329]	0	N	Y	N
ENSG00000157017	Tier 1	GHRL	3	10327359	10334631	-1	ghrelin/obestatin prepropeptide [Source:HGNC Symbol;Acc:18129]	0	Y	Y	N
ENSG00000157103	Tier 1	SLC6A1	3	11034410	11080933	1	solute carrier family 6 (neurotransmitter transporter), member 1 [Source:HGNC Symbol;Acc:11042]	0	Y	N	N
ENSG00000157219	Tier 1	HTR5A	7	154862034	154877459	1	5-hydroxytryptamine (serotonin) receptor 5A, G protein-coupled [Source:HGNC Symbol;Acc:5300]	0	Y	Y	N
ENSG00000157227	Tier 1	MMP14	14	23305766	23318236	1	matrix metallopeptidase 14 (membrane-inserted) [Source:HGNC Symbol;Acc:7160]	0	Y	N	N
ENSG00000157326	Tier 1	DHRS4	14	24422795	24438488	1	dehydrogenase/reductase (SDR family) member 4 [Source:HGNC Symbol;Acc:16985]	0	N	N	Y
ENSG00000157379	Tier 1	DHRS1	14	24759804	24769039	-1	dehydrogenase/reductase (SDR family) member 1 [Source:HGNC Symbol;Acc:16445]	1	N	N	Y
ENSG00000157388	Tier 1	CACNA1D	3	53528683	53847760	1	calcium channel, voltage-dependent, L type, alpha 1D subunit [Source:HGNC Symbol;Acc:1391]	2	Y	N	N
ENSG00000157404	Tier 1	KIT	4	55524085	55606881	1	v-kit Hardy-Zuckerman 4 feline sarcoma viral oncogene homolog [Source:HGNC Symbol;Acc:6342]	0	Y	Y	N
ENSG00000157456	Tier 1	CCNB2	15	59397277	59417244	1	cyclin B2 [Source:HGNC Symbol;Acc:1580]	0	Y	N	N
ENSG00000157540	Tier 1	DYRK1A	21	38738092	38889753	1	dual-specificity tyrosine-(Y)-phosphorylation regulated kinase 1A [Source:HGNC Symbol;Acc:3091]	0	Y	N	N
ENSG00000157764	Tier 1	BRAF	7	140419127	140624564	-1	v-raf murine sarcoma viral oncogene homolog B [Source:HGNC Symbol;Acc:1097]	0	Y	N	N
ENSG00000157765	Tier 1	SLC34A2	4	25656923	25680370	1	solute carrier family 34 (type II sodium/phosphate contransporter), member 2 [Source:HGNC Symbol;Acc:11020]	0	N	Y	N
ENSG00000158104	Tier 1	HPD	12	122277433	122301502	-1	4-hydroxyphenylpyruvate dioxygenase [Source:HGNC Symbol;Acc:5147]	8	Y	N	N
ENSG00000158125	Tier 1	XDH	2	31557187	31637581	-1	xanthine dehydrogenase [Source:HGNC Symbol;Acc:12805]	1	Y	Y	Y
ENSG00000158296	Tier 1	SLC13A3	20	45186463	45304714	-1	solute carrier family 13 (sodium-dependent dicarboxylate transporter), member 3 [Source:HGNC Symbol;Acc:14430]	2	N	N	Y
ENSG00000158748	Tier 1	HTR6	1	19991780	20006055	1	5-hydroxytryptamine (serotonin) receptor 6, G protein-coupled [Source:HGNC Symbol;Acc:5301]	0	Y	Y	N
ENSG00000158825	Tier 1	CDA	1	20915441	20945401	1	cytidine deaminase [Source:HGNC Symbol;Acc:1712]	0	Y	Y	Y
ENSG00000159110	Tier 1	IFNAR2	21	34602206	34637980	1	interferon (alpha, beta and omega) receptor 2 [Source:HGNC Symbol;Acc:5433]	0	N	Y	N
ENSG00000159128	Tier 1	IFNGR2	21	34775202	34851655	1	interferon gamma receptor 2 (interferon gamma transducer 1) [Source:HGNC Symbol;Acc:5440]	2	N	Y	N
ENSG00000159131	Tier 1	GART	21	34876238	34915797	-1	phosphoribosylglycinamide formyltransferase, phosphoribosylglycinamide synthetase, phosphoribosylaminoimidazole synthetase [Source:HGNC Symbol;Acc:4163]	0	Y	N	N
ENSG00000159164	Tier 1	SV2A	1	149874870	149889434	-1	synaptic vesicle glycoprotein 2A [Source:HGNC Symbol;Acc:20566]	0	Y	N	N
ENSG00000159228	Tier 1	CBR1	21	37442239	37445464	1	carbonyl reductase 1 [Source:HGNC Symbol;Acc:1548]	0	Y	N	Y
ENSG00000159231	Tier 1	CBR3	21	37507210	37518864	1	carbonyl reductase 3 [Source:HGNC Symbol;Acc:1549]	0	N	N	Y
ENSG00000159423	Tier 1	ALDH4A1	1	19197926	19229275	-1	aldehyde dehydrogenase 4 family, member A1 [Source:HGNC Symbol;Acc:406]	0	Y	N	Y
ENSG00000159640	Tier 1	ACE	17	61554422	61599205	1	angiotensin I converting enzyme [Source:HGNC Symbol;Acc:2707]	13	Y	Y	N
ENSG00000159958	Tier 1	TNFRSF13C	22	42321045	42322822	-1	tumor necrosis factor receptor superfamily, member 13C [Source:HGNC Symbol;Acc:17755]	0	N	Y	N
ENSG00000160013	Tier 1	PTGIR	19	47123725	47128375	-1	prostaglandin I2 (prostacyclin) receptor (IP) [Source:HGNC Symbol;Acc:9602]	1	Y	N	N
ENSG00000160179	Tier 1	ABCG1	21	43619799	43717354	1	ATP-binding cassette, sub-family G (WHITE), member 1 [Source:HGNC Symbol;Acc:73]	0	N	Y	Y
ENSG00000160223	Tier 1	ICOSLG	21	45642874	45660849	-1	inducible T-cell co-stimulator ligand [Source:HGNC Symbol;Acc:17087]	1	N	Y	N
ENSG00000160255	Tier 1	ITGB2	21	46305868	46351904	-1	integrin, beta 2 (complement component 3 receptor 3 and 4 subunit) [Source:HGNC Symbol;Acc:6155]	0	Y	Y	N
ENSG00000160396	Tier 1	HIPK4	19	40885178	40896094	-1	homeodomain interacting protein kinase 4 [Source:HGNC Symbol;Acc:19007]	0	Y	N	N
ENSG00000160469	Tier 1	BRSK1	19	55793440	55823901	1	BR serine/threonine kinase 1 [Source:HGNC Symbol;Acc:18994]	4	Y	N	N
ENSG00000160551	Tier 1	TAOK1	17	27717482	27878922	1	TAO kinase 1 [Source:HGNC Symbol;Acc:29259]	6	Y	N	N
ENSG00000160584	Tier 1	SIK3	11	116714118	116969153	-1	SIK family kinase 3 [Source:HGNC Symbol;Acc:29165]	8	Y	N	N
ENSG00000160683	Tier 1	CXCR5	11	118754475	118768508	1	chemokine (C-X-C motif) receptor 5 [Source:HGNC Symbol;Acc:1060]	2	Y	Y	N
ENSG00000160712	Tier 1	IL6R	1	154377669	154441926	1	interleukin 6 receptor [Source:HGNC Symbol;Acc:6019]	9	N	Y	N
ENSG00000160716	Tier 1	CHRNB2	1	154540257	154552502	1	cholinergic receptor, nicotinic, beta 2 (neuronal) [Source:HGNC Symbol;Acc:1962]	0	Y	Y	N
ENSG00000160752	Tier 1	FDPS	1	155278539	155290457	1	farnesyl diphosphate synthase [Source:HGNC Symbol;Acc:3631]	5	Y	N	N
ENSG00000160789	Tier 1	LMNA	1	156052364	156109880	1	lamin A/C [Source:HGNC Symbol;Acc:6636]	1	Y	N	N
ENSG00000160791	Tier 1	CCR5	3	46411633	46417697	1	chemokine (C-C motif) receptor 5 (gene/pseudogene) [Source:HGNC Symbol;Acc:1606]	0	Y	Y	N
ENSG00000160801	Tier 1	PTH1R	3	46919236	46945287	1	parathyroid hormone 1 receptor [Source:HGNC Symbol;Acc:9608]	0	Y	Y	N
ENSG00000160867	Tier 1	FGFR4	5	176513887	176525145	1	fibroblast growth factor receptor 4 [Source:HGNC Symbol;Acc:3691]	1	Y	Y	N
ENSG00000160868	Tier 1	CYP3A4	7	99354604	99381888	-1	cytochrome P450, family 3, subfamily A, polypeptide 4 [Source:HGNC Symbol;Acc:2637]	1	Y	N	Y
ENSG00000160870	Tier 1	CYP3A7	7	99302660	99332819	-1	cytochrome P450, family 3, subfamily A, polypeptide 7 [Source:HGNC Symbol;Acc:2640]	5	Y	N	Y
ENSG00000160882	Tier 1	CYP11B1	8	143953772	143961262	-1	cytochrome P450, family 11, subfamily B, polypeptide 1 [Source:HGNC Symbol;Acc:2591]	0	Y	N	Y
ENSG00000160951	Tier 1	PTGER1	19	14583278	14586174	-1	prostaglandin E receptor 1 (subtype EP1), 42kDa [Source:HGNC Symbol;Acc:9593]	0	Y	N	N
ENSG00000161509	Tier 1	GRIN2C	17	72838162	72857627	-1	glutamate receptor, ionotropic, N-methyl D-aspartate 2C [Source:HGNC Symbol;Acc:4587]	0	Y	N	N
ENSG00000161638	Tier 1	ITGA5	12	54789045	54813244	-1	integrin, alpha 5 (fibronectin receptor, alpha polypeptide) [Source:HGNC Symbol;Acc:6141]	0	Y	Y	N
ENSG00000161905	Tier 1	ALOX15	17	4534197	4545589	-1	arachidonate 15-lipoxygenase [Source:HGNC Symbol;Acc:433]	0	Y	N	N
ENSG00000162009	Tier 1	SSTR5	16	1122756	1131454	1	somatostatin receptor 5 [Source:HGNC Symbol;Acc:11334]	0	Y	Y	N
ENSG00000162302	Tier 1	RPS6KA4	11	64126620	64139687	1	ribosomal protein S6 kinase, 90kDa, polypeptide 4 [Source:HGNC Symbol;Acc:10433]	5	Y	N	N
ENSG00000162409	Tier 1	PRKAA2	1	57110995	57181008	1	protein kinase, AMP-activated, alpha 2 catalytic subunit [Source:HGNC Symbol;Acc:9377]	0	Y	N	N
ENSG00000162434	Tier 1	JAK1	1	65298912	65432187	-1	Janus kinase 1 [Source:HGNC Symbol;Acc:6190]	0	Y	N	N
ENSG00000162496	Tier 1	DHRS3	1	12627939	12677737	-1	dehydrogenase/reductase (SDR family) member 3 [Source:HGNC Symbol;Acc:17693]	0	N	N	Y
ENSG00000162733	Tier 1	DDR2	1	162601163	162757190	1	discoidin domain receptor tyrosine kinase 2 [Source:HGNC Symbol;Acc:2731]	0	Y	Y	N
ENSG00000162736	Tier 1	NCSTN	1	160313062	160328742	1	nicastrin [Source:HGNC Symbol;Acc:17091]	0	Y	N	N
ENSG00000163131	Tier 1	CTSS	1	150702672	150738433	-1	cathepsin S [Source:HGNC Symbol;Acc:2545]	5	Y	N	N
ENSG00000163235	Tier 1	TGFA	2	70674412	70781325	-1	transforming growth factor, alpha [Source:HGNC Symbol;Acc:11765]	0	N	Y	N
ENSG00000163285	Tier 1	GABRG1	4	46037786	46126098	-1	gamma-aminobutyric acid (GABA) A receptor, gamma 1 [Source:HGNC Symbol;Acc:4086]	0	Y	Y	N
ENSG00000163288	Tier 1	GABRB1	4	46995740	47428461	1	gamma-aminobutyric acid (GABA) A receptor, beta 1 [Source:HGNC Symbol;Acc:4081]	0	Y	Y	N
ENSG00000163349	Tier 1	HIPK1	1	114471814	114520426	1	homeodomain interacting protein kinase 1 [Source:HGNC Symbol;Acc:19006]	0	Y	N	N
ENSG00000163393	Tier 1	SLC22A15	1	116519119	116612675	1	solute carrier family 22, member 15 [Source:HGNC Symbol;Acc:20301]	0	Y	N	Y
ENSG00000163394	Tier 1	CCKAR	4	26483022	26492084	-1	cholecystokinin A receptor [Source:HGNC Symbol;Acc:1570]	0	Y	Y	N
ENSG00000163399	Tier 1	ATP1A1	1	116915290	116952883	1	ATPase, Na+/K+ transporting, alpha 1 polypeptide [Source:HGNC Symbol;Acc:799]	0	Y	N	N
ENSG00000163406	Tier 1	SLC15A2	3	121612936	121662949	1	solute carrier family 15 (oligopeptide transporter), member 2 [Source:HGNC Symbol;Acc:10921]	1	Y	N	Y
ENSG00000163464	Tier 1	CXCR1	2	219027568	219031718	-1	chemokine (C-X-C motif) receptor 1 [Source:HGNC Symbol;Acc:6026]	2	Y	Y	N
ENSG00000163485	Tier 1	ADORA1	1	203059782	203136533	1	adenosine A1 receptor [Source:HGNC Symbol;Acc:262]	0	Y	N	N
ENSG00000163513	Tier 1	TGFBR2	3	30647994	30735634	1	transforming growth factor, beta receptor II (70/80kDa) [Source:HGNC Symbol;Acc:11773]	1	Y	Y	N
ENSG00000163517	Tier 1	HDAC11	3	13521224	13547916	1	histone deacetylase 11 [Source:HGNC Symbol;Acc:19086]	1	Y	N	N
ENSG00000163545	Tier 1	NUAK2	1	205271187	205290883	-1	NUAK family, SNF1-like kinase, 2 [Source:HGNC Symbol;Acc:29558]	0	Y	N	N
ENSG00000163558	Tier 1	PRKCI	3	169940153	170023769	1	protein kinase C, iota [Source:HGNC Symbol;Acc:9404]	0	Y	N	N
ENSG00000163586	Tier 1	FABP1	2	88422510	88427635	-1	fatty acid binding protein 1, liver [Source:HGNC Symbol;Acc:3555]	0	Y	N	N
ENSG00000163599	Tier 1	CTLA4	2	204732509	204738683	1	cytotoxic T-lymphocyte-associated protein 4 [Source:HGNC Symbol;Acc:2505]	9	N	Y	N
ENSG00000163600	Tier 1	ICOS	2	204801471	204826300	1	inducible T-cell co-stimulator [Source:HGNC Symbol;Acc:5351]	1	N	Y	N
ENSG00000163673	Tier 1	DCLK3	3	36753913	36781352	-1	doublecortin-like kinase 3 [Source:HGNC Symbol;Acc:19005]	0	Y	N	N
ENSG00000163823	Tier 1	CCR1	3	46243200	46249887	-1	chemokine (C-C motif) receptor 1 [Source:HGNC Symbol;Acc:1602]	3	Y	Y	N
ENSG00000163873	Tier 1	GRIK3	1	37261128	37499730	-1	glutamate receptor, ionotropic, kainate 3 [Source:HGNC Symbol;Acc:4581]	0	Y	N	N
ENSG00000163932	Tier 1	PRKCD	3	53190025	53226733	1	protein kinase C, delta [Source:HGNC Symbol;Acc:9399]	0	Y	N	N
ENSG00000164024	Tier 1	METAP1	4	99916771	99983964	1	methionyl aminopeptidase 1 [Source:HGNC Symbol;Acc:15789]	0	Y	N	Y
ENSG00000164078	Tier 1	MST1R	3	49924435	49941299	-1	macrophage stimulating 1 receptor (c-met-related tyrosine kinase) [Source:HGNC Symbol;Acc:7381]	3	Y	Y	N
ENSG00000164082	Tier 1	GRM2	3	51741086	51752629	1	glutamate receptor, metabotropic 2 [Source:HGNC Symbol;Acc:4594]	1	Y	N	N
ENSG00000164129	Tier 1	NPY5R	4	164265091	164273086	1	neuropeptide Y receptor Y5 [Source:HGNC Symbol;Acc:7958]	0	Y	Y	N
ENSG00000164136	Tier 1	IL15	4	142557752	142655140	1	interleukin 15 [Source:HGNC Symbol;Acc:5977]	0	N	Y	N
ENSG00000164171	Tier 1	ITGA2	5	52285156	52390609	1	integrin, alpha 2 (CD49B, alpha 2 subunit of VLA-2 receptor) [Source:HGNC Symbol;Acc:6137]	0	Y	Y	N
ENSG00000164270	Tier 1	HTR4	5	147830595	148056798	-1	5-hydroxytryptamine (serotonin) receptor 4, G protein-coupled [Source:HGNC Symbol;Acc:5299]	4	Y	Y	N
ENSG00000164344	Tier 1	KLKB1	4	187130133	187179625	1	kallikrein B, plasma (Fletcher factor) 1 [Source:HGNC Symbol;Acc:6371]	10	Y	Y	N
ENSG00000164400	Tier 1	CSF2	5	131409483	131411859	1	colony stimulating factor 2 (granulocyte-macrophage) [Source:HGNC Symbol;Acc:2434]	8	N	Y	N
ENSG00000164418	Tier 1	GRIK2	6	101846664	102517958	1	glutamate receptor, ionotropic, kainate 2 [Source:HGNC Symbol;Acc:4580]	0	Y	N	N
ENSG00000164535	Tier 1	DAGLB	7	6448757	6523821	-1	diacylglycerol lipase, beta [Source:HGNC Symbol;Acc:28923]	1	Y	N	N
ENSG00000164543	Tier 1	STK17A	7	43622357	43666385	1	serine/threonine kinase 17a [Source:HGNC Symbol;Acc:11395]	0	Y	N	N
ENSG00000164647	Tier 1	STEAP1	7	89783689	89794143	1	six transmembrane epithelial antigen of the prostate 1 [Source:HGNC Symbol;Acc:11378]	1	N	Y	N
ENSG00000164690	Tier 1	SHH	7	155592680	155604967	-1	sonic hedgehog [Source:HGNC Symbol;Acc:10848]	0	Y	Y	N
ENSG00000164733	Tier 1	CTSB	8	11700033	11726957	-1	cathepsin B [Source:HGNC Symbol;Acc:2527]	0	Y	N	N
ENSG00000164742	Tier 1	ADCY1	7	45613739	45762715	1	adenylate cyclase 1 (brain) [Source:HGNC Symbol;Acc:232]	0	Y	N	N
ENSG00000164776	Tier 1	PHKG1	7	56148440	56160689	-1	phosphorylase kinase, gamma 1 (muscle) [Source:HGNC Symbol;Acc:8930]	2	Y	N	N
ENSG00000164850	Tier 1	GPER1	7	1121844	1133451	1	G protein-coupled estrogen receptor 1 [Source:HGNC Symbol;Acc:4485]	1	Y	Y	N
ENSG00000164867	Tier 1	NOS3	7	150688083	150711676	1	nitric oxide synthase 3 (endothelial cell) [Source:HGNC Symbol;Acc:7876]	0	Y	N	Y
ENSG00000164879	Tier 1	CA3	8	86285665	86361269	1	carbonic anhydrase III, muscle specific [Source:HGNC Symbol;Acc:1374]	1	Y	N	N
ENSG00000164885	Tier 1	CDK5	7	150750899	150755617	-1	cyclin-dependent kinase 5 [Source:HGNC Symbol;Acc:1774]	0	Y	N	N
ENSG00000164904	Tier 1	ALDH7A1	5	125877533	125931110	-1	aldehyde dehydrogenase 7 family, member A1 [Source:HGNC Symbol;Acc:877]	1	Y	N	Y
ENSG00000165025	Tier 1	SYK	9	93564069	93660831	1	spleen tyrosine kinase [Source:HGNC Symbol;Acc:11491]	1	Y	N	N
ENSG00000165029	Tier 1	ABCA1	9	107543283	107690518	-1	ATP-binding cassette, sub-family A (ABC1), member 1 [Source:HGNC Symbol;Acc:29]	15	Y	Y	Y
ENSG00000165092	Tier 1	ALDH1A1	9	75515578	75695358	-1	aldehyde dehydrogenase 1 family, member A1 [Source:HGNC Symbol;Acc:402]	0	Y	N	Y
ENSG00000165240	Tier 1	ATP7A	X	77166194	77305892	1	ATPase, Cu++ transporting, alpha polypeptide [Source:HGNC Symbol;Acc:869]	0	N	N	Y
ENSG00000165304	Tier 1	MELK	9	36572859	36677678	1	maternal embryonic leucine zipper kinase [Source:HGNC Symbol;Acc:16870]	0	Y	N	N
ENSG00000165409	Tier 1	TSHR	14	81421333	81612646	1	thyroid stimulating hormone receptor [Source:HGNC Symbol;Acc:12373]	1	Y	Y	N
ENSG00000165646	Tier 1	SLC18A2	10	119000604	119038941	1	solute carrier family 18 (vesicular monoamine transporter), member 2 [Source:HGNC Symbol;Acc:10935]	0	Y	N	N
ENSG00000165731	Tier 1	RET	10	43572475	43625799	1	ret proto-oncogene [Source:HGNC Symbol;Acc:9967]	2	Y	N	N
ENSG00000165841	Tier 1	CYP2C19	10	96447911	96613017	1	cytochrome P450, family 2, subfamily C, polypeptide 19 [Source:HGNC Symbol;Acc:2621]	12	Y	N	Y
ENSG00000166148	Tier 1	AVPR1A	12	63539014	63544722	-1	arginine vasopressin receptor 1A [Source:HGNC Symbol;Acc:895]	0	Y	Y	N
ENSG00000166206	Tier 1	GABRB3	15	26788693	27184686	-1	gamma-aminobutyric acid (GABA) A receptor, beta 3 [Source:HGNC Symbol;Acc:4083]	0	Y	Y	N
ENSG00000166501	Tier 1	PRKCB	16	23847322	24231932	1	protein kinase C, beta [Source:HGNC Symbol;Acc:9395]	1	Y	N	N
ENSG00000166603	Tier 1	MC4R	18	58038564	58040001	-1	melanocortin 4 receptor [Source:HGNC Symbol;Acc:6932]	0	Y	Y	N
ENSG00000166736	Tier 1	HTR3A	11	113845603	113861035	1	5-hydroxytryptamine (serotonin) receptor 3A, ionotropic [Source:HGNC Symbol;Acc:5297]	0	Y	N	N
ENSG00000166741	Tier 1	NNMT	11	114128509	114184007	1	nicotinamide N-methyltransferase [Source:HGNC Symbol;Acc:7861]	0	Y	N	Y
ENSG00000166794	Tier 1	PPIB	15	64448011	64455404	-1	peptidylprolyl isomerase B (cyclophilin B) [Source:HGNC Symbol;Acc:9255]	0	Y	Y	N
ENSG00000166851	Tier 1	PLK1	16	23688977	23701688	1	polo-like kinase 1 [Source:HGNC Symbol;Acc:9077]	1	Y	N	N
ENSG00000167165	Tier 1	UGT1A6	2	234600253	234681946	1	UDP glucuronosyltransferase 1 family, polypeptide A6 [Source:HGNC Symbol;Acc:12538]	32	N	N	Y
ENSG00000167244	Tier 1	IGF2	11	2150342	2170833	-1	insulin-like growth factor 2 (somatomedin A) [Source:HGNC Symbol;Acc:5466]	3	N	Y	N
ENSG00000167325	Tier 1	RRM1	11	4115937	4160106	1	ribonucleotide reductase M1 [Source:HGNC Symbol;Acc:10451]	0	Y	N	N
ENSG00000167346	Tier 1	MMP26	11	4726157	5013659	1	matrix metallopeptidase 26 [Source:HGNC Symbol;Acc:14249]	1	Y	Y	N
ENSG00000167397	Tier 1	VKORC1	16	31102163	31107301	-1	vitamin K epoxide reductase complex, subunit 1 [Source:HGNC Symbol;Acc:23663]	6	Y	N	N
ENSG00000167434	Tier 1	CA4	17	58227297	58248260	1	carbonic anhydrase IV [Source:HGNC Symbol;Acc:1375]	0	Y	Y	N
ENSG00000167468	Tier 1	GPX4	19	1103936	1106787	1	glutathione peroxidase 4 [Source:HGNC Symbol;Acc:4556]	2	N	N	Y
ENSG00000167536	Tier 1	DHRS13	17	27224799	27230089	-1	dehydrogenase/reductase (SDR family) member 13 [Source:HGNC Symbol;Acc:28326]	0	N	N	Y
ENSG00000167600	Tier 1	CYP2S1	19	41698954	41713444	1	cytochrome P450, family 2, subfamily S, polypeptide 1 [Source:HGNC Symbol;Acc:15654]	0	Y	N	Y
ENSG00000167601	Tier 1	AXL	19	41725108	41767671	1	AXL receptor tyrosine kinase [Source:HGNC Symbol;Acc:905]	0	Y	Y	N
ENSG00000167653	Tier 1	PSCA	8	143751726	143764142	1	prostate stem cell antigen [Source:HGNC Symbol;Acc:9500]	3	N	Y	N
ENSG00000167657	Tier 1	DAPK3	19	3958451	3971121	-1	death-associated protein kinase 3 [Source:HGNC Symbol;Acc:2676]	0	Y	N	N
ENSG00000167658	Tier 1	EEF2	19	3976054	3985467	-1	eukaryotic translation elongation factor 2 [Source:HGNC Symbol;Acc:3214]	0	N	Y	N
ENSG00000167723	Tier 1	TRPV3	17	3413796	3461289	-1	transient receptor potential cation channel, subfamily V, member 3 [Source:HGNC Symbol;Acc:18084]	0	Y	N	N
ENSG00000167900	Tier 1	TK1	17	76170160	76183314	-1	thymidine kinase 1, soluble [Source:HGNC Symbol;Acc:11830]	0	Y	N	N
ENSG00000167910	Tier 1	CYP7A1	8	59402737	59412795	-1	cytochrome P450, family 7, subfamily A, polypeptide 1 [Source:HGNC Symbol;Acc:2651]	3	N	N	Y
ENSG00000167941	Tier 1	SOST	17	41831099	41836156	-1	sclerostin [Source:HGNC Symbol;Acc:13771]	2	N	Y	N
ENSG00000168065	Tier 1	SLC22A11	11	64323098	64340347	1	solute carrier family 22 (organic anion/urate transporter), member 11 [Source:HGNC Symbol;Acc:18120]	3	Y	Y	Y
ENSG00000168067	Tier 1	MAP4K2	11	64556290	64570713	-1	mitogen-activated protein kinase kinase kinase kinase 2 [Source:HGNC Symbol;Acc:6864]	1	Y	N	N
ENSG00000168229	Tier 1	PTGDR	14	52734431	52743442	1	prostaglandin D2 receptor (DP) [Source:HGNC Symbol;Acc:9591]	0	Y	N	N
ENSG00000168298	Tier 1	HIST1H1E	6	26156559	26157343	1	histone cluster 1, H1e [Source:HGNC Symbol;Acc:4718]	0	N	Y	N
ENSG00000168356	Tier 1	SCN11A	3	38887260	38992052	-1	sodium channel, voltage-gated, type XI, alpha subunit [Source:HGNC Symbol;Acc:10583]	1	Y	N	N
ENSG00000168398	Tier 1	BDKRB2	14	96671016	96710666	1	bradykinin receptor B2 [Source:HGNC Symbol;Acc:1030]	0	Y	Y	N
ENSG00000168412	Tier 1	MTNR1A	4	187454809	187476721	-1	melatonin receptor 1A [Source:HGNC Symbol;Acc:7463]	0	Y	N	N
ENSG00000168522	Tier 1	FNTA	8	42889337	42940931	1	farnesyltransferase, CAAX box, alpha [Source:HGNC Symbol;Acc:3782]	0	Y	N	N
ENSG00000168539	Tier 1	CHRM1	11	62676151	62689279	-1	cholinergic receptor, muscarinic 1 [Source:HGNC Symbol;Acc:1950]	0	Y	N	N
ENSG00000168610	Tier 1	STAT3	17	40465342	40540586	-1	signal transducer and activator of transcription 3 (acute-phase response factor) [Source:HGNC Symbol;Acc:11364]	6	Y	Y	N
ENSG00000168615	Tier 1	ADAM9	8	38854388	38962663	1	ADAM metallopeptidase domain 9 [Source:HGNC Symbol;Acc:216]	0	Y	Y	N
ENSG00000168748	Tier 1	CA7	16	66878282	66888056	1	carbonic anhydrase VII [Source:HGNC Symbol;Acc:1381]	0	Y	N	N
ENSG00000168765	Tier 1	GSTM4	1	110198703	110208118	1	glutathione S-transferase mu 4 [Source:HGNC Symbol;Acc:4636]	1	N	N	Y
ENSG00000168830	Tier 1	HTR1E	6	87647024	87726349	1	5-hydroxytryptamine (serotonin) receptor 1E, G protein-coupled [Source:HGNC Symbol;Acc:5291]	0	Y	Y	N
ENSG00000168959	Tier 1	GRM5	11	88237744	88799113	-1	glutamate receptor, metabotropic 5 [Source:HGNC Symbol;Acc:4597]	10	Y	N	N
ENSG00000169032	Tier 1	MAP2K1	15	66679155	66784650	1	mitogen-activated protein kinase kinase 1 [Source:HGNC Symbol;Acc:6840]	0	Y	N	N
ENSG00000169083	Tier 1	AR	X	66764465	66950461	1	androgen receptor [Source:HGNC Symbol;Acc:644]	4	Y	Y	N
ENSG00000169084	Tier 1	DHRSX	X	2137557	2420846	-1	dehydrogenase/reductase (SDR family) X-linked [Source:HGNC Symbol;Acc:18399]	0	N	N	Y
ENSG00000169174	Tier 1	PCSK9	1	55505221	55530525	1	proprotein convertase subtilisin/kexin type 9 [Source:HGNC Symbol;Acc:20001]	3	N	Y	N
ENSG00000169194	Tier 1	IL13	5	131991955	131996802	1	interleukin 13 [Source:HGNC Symbol;Acc:5973]	6	N	Y	N
ENSG00000169239	Tier 1	CA5B	X	15706953	15805747	1	carbonic anhydrase VB, mitochondrial [Source:HGNC Symbol;Acc:1378]	0	Y	N	N
ENSG00000169245	Tier 1	CXCL10	4	76942273	76944650	-1	chemokine (C-X-C motif) ligand 10 [Source:HGNC Symbol;Acc:10637]	0	N	Y	N
ENSG00000169252	Tier 1	ADRB2	5	148206156	148208196	1	adrenoceptor beta 2, surface [Source:HGNC Symbol;Acc:286]	0	Y	Y	N
ENSG00000169313	Tier 1	P2RY12	3	151055168	151102600	-1	purinergic receptor P2Y, G-protein coupled, 12 [Source:HGNC Symbol;Acc:18124]	0	Y	N	N
ENSG00000169398	Tier 1	PTK2	8	141667999	142012315	-1	protein tyrosine kinase 2 [Source:HGNC Symbol;Acc:9611]	0	Y	N	N
ENSG00000169403	Tier 1	PTAFR	1	28473677	28520447	-1	platelet-activating factor receptor [Source:HGNC Symbol;Acc:9582]	0	Y	Y	N
ENSG00000169418	Tier 1	NPR1	1	153651113	153666468	1	natriuretic peptide receptor A/guanylate cyclase A (atrionatriuretic peptide receptor A) [Source:HGNC Symbol;Acc:7943]	0	Y	Y	N
ENSG00000169427	Tier 1	KCNK9	8	140613081	140715299	-1	potassium channel, subfamily K, member 9 [Source:HGNC Symbol;Acc:6283]	1	Y	N	N
ENSG00000169429	Tier 1	IL8	4	74606223	74609433	1	interleukin 8 [Source:HGNC Symbol;Acc:6025]	0	Y	Y	N
ENSG00000169432	Tier 1	SCN9A	2	167051695	167232503	-1	sodium channel, voltage-gated, type IX, alpha subunit [Source:HGNC Symbol;Acc:10597]	0	Y	N	N
ENSG00000169442	Tier 1	CD52	1	26644448	26647014	1	CD52 molecule [Source:HGNC Symbol;Acc:1804]	0	N	Y	N
ENSG00000169676	Tier 1	DRD5	4	9783258	9785632	1	dopamine receptor D5 [Source:HGNC Symbol;Acc:3026]	0	Y	N	N
ENSG00000169710	Tier 1	FASN	17	80036214	80056208	-1	fatty acid synthase [Source:HGNC Symbol;Acc:3594]	1	Y	N	N
ENSG00000169783	Tier 1	LINGO1	15	77905369	78113242	-1	leucine rich repeat and Ig domain containing 1 [Source:HGNC Symbol;Acc:21205]	1	N	Y	N
ENSG00000169836	Tier 1	TACR3	4	104507188	104640973	-1	tachykinin receptor 3 [Source:HGNC Symbol;Acc:11528]	1	Y	Y	N
ENSG00000169967	Tier 1	MAP3K2	2	128056306	128146041	-1	mitogen-activated protein kinase kinase kinase 2 [Source:HGNC Symbol;Acc:6854]	3	Y	N	N
ENSG00000170145	Tier 1	SIK2	11	111473115	111601577	1	salt-inducible kinase 2 [Source:HGNC Symbol;Acc:21680]	0	Y	N	N
ENSG00000170175	Tier 1	CHRNB1	17	7348380	7361026	1	cholinergic receptor, nicotinic, beta 1 (muscle) [Source:HGNC Symbol;Acc:1961]	0	Y	Y	N
ENSG00000170209	Tier 1	ANKK1	11	113258513	113271140	1	ankyrin repeat and kinase domain containing 1 [Source:HGNC Symbol;Acc:21027]	0	Y	N	N
ENSG00000170214	Tier 1	ADRA1B	5	159343790	159399551	1	adrenoceptor alpha 1B [Source:HGNC Symbol;Acc:278]	0	Y	Y	N
ENSG00000170312	Tier 1	CDK1	10	62538089	62554610	1	cyclin-dependent kinase 1 [Source:HGNC Symbol;Acc:1722]	0	Y	N	N
ENSG00000170421	Tier 1	KRT8	12	53290977	53343738	-1	keratin 8 [Source:HGNC Symbol;Acc:6446]	1	N	Y	N
ENSG00000170425	Tier 1	ADORA2B	17	15848231	15879060	1	adenosine A2b receptor [Source:HGNC Symbol;Acc:264]	0	Y	Y	N
ENSG00000170430	Tier 1	MGMT	10	131265448	131566271	1	O-6-methylguanine-DNA methyltransferase [Source:HGNC Symbol;Acc:7059]	1	Y	N	N
ENSG00000170458	Tier 1	CD14	5	140011313	140013286	-1	CD14 molecule [Source:HGNC Symbol;Acc:1628]	0	N	Y	N
ENSG00000170558	Tier 1	CDH2	18	25530930	25757410	-1	cadherin 2, type 1, N-cadherin (neuronal) [Source:HGNC Symbol;Acc:1759]	0	N	Y	N
ENSG00000170820	Tier 1	FSHR	2	49189296	49381676	-1	follicle stimulating hormone receptor [Source:HGNC Symbol;Acc:3969]	1	Y	Y	N
ENSG00000170899	Tier 1	GSTA4	6	52842751	52860176	-1	glutathione S-transferase alpha 4 [Source:HGNC Symbol;Acc:4629]	0	N	N	Y
ENSG00000170956	Tier 1	CEACAM3	19	42300369	42315591	1	carcinoembryonic antigen-related cell adhesion molecule 3 [Source:HGNC Symbol;Acc:1815]	0	N	Y	N
ENSG00000170989	Tier 1	S1PR1	1	101702444	101707074	1	sphingosine-1-phosphate receptor 1 [Source:HGNC Symbol;Acc:3165]	0	Y	Y	N
ENSG00000171094	Tier 1	ALK	2	29415640	30144432	-1	anaplastic lymphoma receptor tyrosine kinase [Source:HGNC Symbol;Acc:427]	0	Y	Y	N
ENSG00000171105	Tier 1	INSR	19	7112266	7294045	-1	insulin receptor [Source:HGNC Symbol;Acc:6091]	4	Y	Y	N
ENSG00000171132	Tier 1	PRKCE	2	45878484	46415129	1	protein kinase C, epsilon [Source:HGNC Symbol;Acc:9401]	5	Y	N	N
ENSG00000171189	Tier 1	GRIK1	21	30909254	31312351	-1	glutamate receptor, ionotropic, kainate 1 [Source:HGNC Symbol;Acc:4579]	1	Y	N	N
ENSG00000171234	Tier 1	UGT2B7	4	69917081	69978705	1	UDP glucuronosyltransferase 2 family, polypeptide B7 [Source:HGNC Symbol;Acc:12554]	0	Y	Y	Y
ENSG00000171298	Tier 1	GAA	17	78075355	78093678	1	glucosidase, alpha; acid [Source:HGNC Symbol;Acc:4065]	0	Y	N	N
ENSG00000171303	Tier 1	KCNK3	2	26915619	26956288	1	potassium channel, subfamily K, member 3 [Source:HGNC Symbol;Acc:6278]	0	Y	N	N
ENSG00000171310	Tier 1	CHST11	12	104849073	105155792	1	carbohydrate (chondroitin 4) sulfotransferase 11 [Source:HGNC Symbol;Acc:17422]	0	N	N	Y
ENSG00000171345	Tier 1	KRT19	17	39679869	39684560	-1	keratin 19 [Source:HGNC Symbol;Acc:6436]	0	N	Y	N
ENSG00000171408	Tier 1	PDE7B	6	136172834	136516712	1	phosphodiesterase 7B [Source:HGNC Symbol;Acc:8792]	1	Y	N	N
ENSG00000171428	Tier 1	NAT1	8	18027986	18081198	1	N-acetyltransferase 1 (arylamine N-acetyltransferase) [Source:HGNC Symbol;Acc:7645]	0	Y	N	Y
ENSG00000171497	Tier 1	PPID	4	159630286	159644548	-1	peptidylprolyl isomerase D [Source:HGNC Symbol;Acc:9257]	6	Y	Y	N
ENSG00000171522	Tier 1	PTGER4	5	40679600	40693837	1	prostaglandin E receptor 4 (subtype EP4) [Source:HGNC Symbol;Acc:9596]	1	Y	N	N
ENSG00000171552	Tier 1	BCL2L1	20	30252255	30311792	-1	BCL2-like 1 [Source:HGNC Symbol;Acc:992]	0	Y	N	N
ENSG00000171557	Tier 1	FGG	4	155525286	155534119	-1	fibrinogen gamma chain [Source:HGNC Symbol;Acc:3694]	5	N	Y	N
ENSG00000171560	Tier 1	FGA	4	155504278	155511918	-1	fibrinogen alpha chain [Source:HGNC Symbol;Acc:3661]	6	N	Y	N
ENSG00000171564	Tier 1	FGB	4	155484108	155492238	1	fibrinogen beta chain [Source:HGNC Symbol;Acc:3662]	7	N	Y	N
ENSG00000171608	Tier 1	PIK3CD	1	9711790	9789172	1	phosphatidylinositol-4,5-bisphosphate 3-kinase, catalytic subunit delta [Source:HGNC Symbol;Acc:8977]	0	Y	N	N
ENSG00000171720	Tier 1	HDAC3	5	141000443	141016437	-1	histone deacetylase 3 [Source:HGNC Symbol;Acc:4854]	0	Y	N	N
ENSG00000171759	Tier 1	PAH	12	103230663	103352188	-1	phenylalanine hydroxylase [Source:HGNC Symbol;Acc:8582]	1	Y	N	N
ENSG00000171791	Tier 1	BCL2	18	60790579	60987361	-1	B-cell CLL/lymphoma 2 [Source:HGNC Symbol;Acc:990]	3	Y	N	N
ENSG00000171848	Tier 1	RRM2	2	10262455	10271545	1	ribonucleotide reductase M2 [Source:HGNC Symbol;Acc:10452]	0	Y	N	N
ENSG00000171873	Tier 1	ADRA1D	20	4201329	4229721	-1	adrenoceptor alpha 1D [Source:HGNC Symbol;Acc:280]	0	Y	Y	N
ENSG00000171903	Tier 1	CYP4F11	19	16023177	16045677	-1	cytochrome P450, family 4, subfamily F, polypeptide 11 [Source:HGNC Symbol;Acc:13265]	1	Y	N	Y
ENSG00000172037	Tier 1	LAMB2	3	49158547	49170551	-1	laminin, beta 2 (laminin S) [Source:HGNC Symbol;Acc:6487]	2	N	Y	N
ENSG00000172062	Tier 1	SMN1	5	70220768	70249769	1	survival of motor neuron 1, telomeric [Source:HGNC Symbol;Acc:11117]	0	Y	N	N
ENSG00000172156	Tier 1	CCL11	17	32612687	32615353	1	chemokine (C-C motif) ligand 11 [Source:HGNC Symbol;Acc:10610]	3	N	Y	N
ENSG00000172270	Tier 1	BSG	19	571297	583493	1	basigin (Ok blood group) [Source:HGNC Symbol;Acc:1116]	0	N	Y	N
ENSG00000172572	Tier 1	PDE3A	12	20522179	20837315	1	phosphodiesterase 3A, cGMP-inhibited [Source:HGNC Symbol;Acc:8778]	1	Y	N	Y
ENSG00000172817	Tier 1	CYP7B1	8	65500320	65711318	-1	cytochrome P450, family 7, subfamily B, polypeptide 1 [Source:HGNC Symbol;Acc:2652]	0	N	N	Y
ENSG00000172819	Tier 1	RARG	12	53604354	53626764	-1	retinoic acid receptor, gamma [Source:HGNC Symbol;Acc:9866]	0	Y	N	N
ENSG00000172831	Tier 1	CES2	16	66968347	66978999	1	carboxylesterase 2 [Source:HGNC Symbol;Acc:1864]	0	Y	Y	Y
ENSG00000172889	Tier 1	EGFL7	9	139553308	139567130	1	EGF-like-domain, multiple 7 [Source:HGNC Symbol;Acc:20594]	0	N	Y	N
ENSG00000172893	Tier 1	DHCR7	11	71139239	71163914	-1	7-dehydrocholesterol reductase [Source:HGNC Symbol;Acc:2860]	2	Y	N	N
ENSG00000172940	Tier 1	SLC22A13	3	38307303	38319806	1	solute carrier family 22 (organic anion/urate transporter), member 13 [Source:HGNC Symbol;Acc:8494]	0	Y	N	Y
ENSG00000172955	Tier 1	ADH6	4	100123795	100140694	-1	alcohol dehydrogenase 6 (class V) [Source:HGNC Symbol;Acc:255]	5	Y	N	Y
ENSG00000173020	Tier 1	ADRBK1	11	67033881	67054027	1	adrenergic, beta, receptor kinase 1 [Source:HGNC Symbol;Acc:289]	0	Y	N	N
ENSG00000173153	Tier 1	ESRRA	11	64073044	64084215	1	estrogen-related receptor alpha [Source:HGNC Symbol;Acc:3471]	5	Y	N	N
ENSG00000173175	Tier 1	ADCY5	3	123001143	123168605	-1	adenylate cyclase 5 [Source:HGNC Symbol;Acc:236]	7	Y	N	N
ENSG00000173198	Tier 1	CYSLTR1	X	77526961	77583048	-1	cysteinyl leukotriene receptor 1 [Source:HGNC Symbol;Acc:17451]	0	Y	N	N
ENSG00000173327	Tier 1	MAP3K11	11	65365226	65382853	-1	mitogen-activated protein kinase kinase kinase 11 [Source:HGNC Symbol;Acc:6850]	2	Y	N	N
ENSG00000173511	Tier 1	VEGFB	11	64002010	64006259	1	vascular endothelial growth factor B [Source:HGNC Symbol;Acc:12681]	1	N	Y	N
ENSG00000173585	Tier 1	CCR9	3	45927996	45944667	1	chemokine (C-C motif) receptor 9 [Source:HGNC Symbol;Acc:1610]	0	Y	Y	N
ENSG00000173597	Tier 1	SULT1B1	4	70586880	70653679	-1	sulfotransferase family, cytosolic, 1B, member 1 [Source:HGNC Symbol;Acc:17845]	0	N	N	Y
ENSG00000173610	Tier 1	UGT2A1	4	70454135	70518965	-1	UDP glucuronosyltransferase 2 family, polypeptide A1, complex locus [Source:HGNC Symbol;Acc:12542]	0	N	N	Y
ENSG00000173638	Tier 1	SLC19A1	21	46913486	46964325	-1	solute carrier family 19 (folate transporter), member 1 [Source:HGNC Symbol;Acc:10937]	0	N	Y	Y
ENSG00000173930	Tier 1	SLCO4C1	5	101569690	101632253	-1	solute carrier organic anion transporter family, member 4C1 [Source:HGNC Symbol;Acc:23612]	2	Y	N	Y
ENSG00000174156	Tier 1	GSTA3	6	52761437	52774483	-1	glutathione S-transferase alpha 3 [Source:HGNC Symbol;Acc:4628]	0	N	N	Y
ENSG00000174175	Tier 1	SELP	1	169558087	169599431	-1	selectin P (granule membrane protein 140kDa, antigen CD62) [Source:HGNC Symbol;Acc:10721]	5	Y	Y	N
ENSG00000174292	Tier 1	TNK1	17	7283853	7293093	1	tyrosine kinase, non-receptor, 1 [Source:HGNC Symbol;Acc:11940]	0	Y	N	N
ENSG00000174417	Tier 1	TRHR	8	110098850	110131813	1	thyrotropin-releasing hormone receptor [Source:HGNC Symbol;Acc:12299]	1	Y	Y	N
ENSG00000174607	Tier 1	UGT8	4	115519611	115599380	1	UDP glycosyltransferase 8 [Source:HGNC Symbol;Acc:12555]	0	N	N	Y
ENSG00000174640	Tier 1	SLCO2A1	3	133651540	133771028	-1	solute carrier organic anion transporter family, member 2A1 [Source:HGNC Symbol;Acc:10955]	0	Y	N	Y
ENSG00000174669	Tier 1	SLC29A2	11	66129992	66139685	-1	solute carrier family 29 (equilibrative nucleoside transporter), member 2 [Source:HGNC Symbol;Acc:11004]	0	Y	N	Y
ENSG00000174672	Tier 1	BRSK2	11	1411129	1483919	1	BR serine/threonine kinase 2 [Source:HGNC Symbol;Acc:11405]	0	Y	N	N
ENSG00000174775	Tier 1	HRAS	11	532242	537287	-1	Harvey rat sarcoma viral oncogene homolog [Source:HGNC Symbol;Acc:5173]	0	Y	N	N
ENSG00000174807	Tier 1	CD248	11	66081958	66084515	-1	CD248 molecule, endosialin [Source:HGNC Symbol;Acc:18219]	0	N	Y	N
ENSG00000174990	Tier 1	CA5A	16	87921625	87970135	-1	carbonic anhydrase VA, mitochondrial [Source:HGNC Symbol;Acc:1377]	0	Y	N	N
ENSG00000175003	Tier 1	SLC22A1	6	160542821	160579750	1	solute carrier family 22 (organic cation transporter), member 1 [Source:HGNC Symbol;Acc:10963]	12	Y	N	Y
ENSG00000175040	Tier 1	CHST2	3	142838173	142841800	1	carbohydrate (N-acetylglucosamine-6-O) sulfotransferase 2 [Source:HGNC Symbol;Acc:1970]	0	N	N	Y
ENSG00000175206	Tier 1	NPPA	1	11905766	11908402	-1	natriuretic peptide A [Source:HGNC Symbol;Acc:7939]	1	Y	Y	N
ENSG00000175264	Tier 1	CHST1	11	45670427	45687172	-1	carbohydrate (keratan sulfate Gal-6) sulfotransferase 1 [Source:HGNC Symbol;Acc:1969]	0	N	N	Y
ENSG00000175305	Tier 1	CCNE2	8	95891998	95908906	-1	cyclin E2 [Source:HGNC Symbol;Acc:1590]	1	Y	N	N
ENSG00000175344	Tier 1	CHRNA7	15	32322691	32464722	1	cholinergic receptor, nicotinic, alpha 7 (neuronal) [Source:HGNC Symbol;Acc:1960]	0	Y	Y	N
ENSG00000175535	Tier 1	PNLIP	10	118305443	118327367	1	pancreatic lipase [Source:HGNC Symbol;Acc:9155]	0	Y	Y	N
ENSG00000175591	Tier 1	P2RY2	11	72929343	72947397	1	purinergic receptor P2Y, G-protein coupled, 2 [Source:HGNC Symbol;Acc:8541]	0	Y	Y	N
ENSG00000175756	Tier 1	AURKAIP1	1	1309110	1310875	-1	aurora kinase A interacting protein 1 [Source:HGNC Symbol;Acc:24114]	1	Y	N	N
ENSG00000176014	Tier 1	TUBB6	18	12307668	12344319	1	tubulin, beta 6 class V [Source:HGNC Symbol;Acc:20776]	0	Y	Y	N
ENSG00000176105	Tier 1	YES1	18	721588	812547	-1	v-yes-1 Yamaguchi sarcoma viral oncogene homolog 1 [Source:HGNC Symbol;Acc:12841]	0	Y	N	N
ENSG00000176136	Tier 1	MC5R	18	13824154	13826861	1	melanocortin 5 receptor [Source:HGNC Symbol;Acc:6933]	0	Y	Y	N
ENSG00000176153	Tier 1	GPX2	14	65405870	65409531	-1	glutathione peroxidase 2 (gastrointestinal) [Source:HGNC Symbol;Acc:4554]	0	N	N	Y
ENSG00000176387	Tier 1	HSD11B2	16	67464555	67471456	1	hydroxysteroid (11-beta) dehydrogenase 2 [Source:HGNC Symbol;Acc:5209]	0	Y	N	N
ENSG00000176444	Tier 1	CLK2	1	155232659	155248282	-1	CDC-like kinase 2 [Source:HGNC Symbol;Acc:2069]	4	Y	N	N
ENSG00000176463	Tier 1	SLCO3A1	15	92396925	92715665	1	solute carrier organic anion transporter family, member 3A1 [Source:HGNC Symbol;Acc:10952]	0	N	N	Y
ENSG00000176601	Tier 1	MAP3K19	2	135722061	135805038	-1	mitogen-activated protein kinase kinase kinase 19 [Source:HGNC Symbol;Acc:26249]	5	Y	N	N
ENSG00000176749	Tier 1	CDK5R1	17	30813637	30818274	1	cyclin-dependent kinase 5, regulatory subunit 1 (p35) [Source:HGNC Symbol;Acc:1775]	0	Y	N	N
ENSG00000176884	Tier 1	GRIN1	9	140032842	140063207	1	glutamate receptor, ionotropic, N-methyl D-aspartate 1 [Source:HGNC Symbol;Acc:4584]	0	Y	N	N
ENSG00000176890	Tier 1	TYMS	18	657604	673578	1	thymidylate synthetase [Source:HGNC Symbol;Acc:12441]	0	Y	N	N
ENSG00000177084	Tier 1	POLE	12	133200348	133263951	-1	polymerase (DNA directed), epsilon, catalytic subunit [Source:HGNC Symbol;Acc:9177]	0	Y	N	N
ENSG00000177169	Tier 1	ULK1	12	132379196	132407712	1	unc-51 like autophagy activating kinase 1 [Source:HGNC Symbol;Acc:12558]	0	Y	N	N
ENSG00000177189	Tier 1	RPS6KA3	X	20168029	20285523	-1	ribosomal protein S6 kinase, 90kDa, polypeptide 3 [Source:HGNC Symbol;Acc:10432]	0	Y	N	N
ENSG00000177455	Tier 1	CD19	16	28943260	28950667	1	CD19 molecule [Source:HGNC Symbol;Acc:1633]	8	N	Y	N
ENSG00000177628	Tier 1	GBA	1	155204243	155214490	-1	glucosidase, beta, acid [Source:HGNC Symbol;Acc:4177]	4	Y	Y	N
ENSG00000177663	Tier 1	IL17RA	22	17565844	17596583	1	interleukin 17 receptor A [Source:HGNC Symbol;Acc:5985]	0	N	Y	N
ENSG00000178035	Tier 1	IMPDH2	3	49061758	49066841	-1	IMP (inosine 5'-monophosphate) dehydrogenase 2 [Source:HGNC Symbol;Acc:6053]	2	Y	N	N
ENSG00000178084	Tier 1	HTR3C	3	183770835	183778459	1	5-hydroxytryptamine (serotonin) receptor 3C, ionotropic [Source:HGNC Symbol;Acc:24003]	0	Y	N	N
ENSG00000178394	Tier 1	HTR1A	5	63256183	63258334	-1	5-hydroxytryptamine (serotonin) receptor 1A, G protein-coupled [Source:HGNC Symbol;Acc:5286]	0	Y	Y	N
ENSG00000178467	Tier 1	P4HTM	3	49027319	49044587	1	prolyl 4-hydroxylase, transmembrane (endoplasmic reticulum) [Source:HGNC Symbol;Acc:28858]	2	Y	N	N
ENSG00000178562	Tier 1	CD28	2	204571198	204603635	1	CD28 molecule [Source:HGNC Symbol;Acc:1653]	2	N	Y	N
ENSG00000178568	Tier 1	ERBB4	2	212240446	213403565	-1	v-erb-b2 avian erythroblastic leukemia viral oncogene homolog 4 [Source:HGNC Symbol;Acc:3432]	1	Y	Y	N
ENSG00000178607	Tier 1	ERN1	17	62116502	62208179	-1	endoplasmic reticulum to nucleus signaling 1 [Source:HGNC Symbol;Acc:3449]	0	Y	N	N
ENSG00000178623	Tier 1	GPR35	2	241544848	241570676	1	G protein-coupled receptor 35 [Source:HGNC Symbol;Acc:4492]	2	Y	Y	N
ENSG00000178950	Tier 1	GAK	4	843064	926161	-1	cyclin G associated kinase [Source:HGNC Symbol;Acc:4113]	4	Y	N	N
ENSG00000178999	Tier 1	AURKB	17	8108056	8113918	-1	aurora kinase B [Source:HGNC Symbol;Acc:11390]	1	Y	N	N
ENSG00000179097	Tier 1	HTR1F	3	88039846	88042919	1	5-hydroxytryptamine (serotonin) receptor 1F, G protein-coupled [Source:HGNC Symbol;Acc:5292]	0	Y	Y	N
ENSG00000179142	Tier 1	CYP11B2	8	143991975	143999259	-1	cytochrome P450, family 11, subfamily B, polypeptide 2 [Source:HGNC Symbol;Acc:2592]	0	Y	N	Y
ENSG00000179546	Tier 1	HTR1D	1	23516993	23521222	-1	5-hydroxytryptamine (serotonin) receptor 1D, G protein-coupled [Source:HGNC Symbol;Acc:5289]	1	Y	Y	N
ENSG00000179603	Tier 1	GRM8	7	126078652	126893348	-1	glutamate receptor, metabotropic 8 [Source:HGNC Symbol;Acc:4600]	0	Y	N	N
ENSG00000179921	Tier 1	GPBAR1	2	219124219	219128582	1	G protein-coupled bile acid receptor 1 [Source:HGNC Symbol;Acc:19680]	2	Y	N	N
ENSG00000180176	Tier 1	TH	11	2185159	2193107	-1	tyrosine hydroxylase [Source:HGNC Symbol;Acc:11782]	1	Y	N	N
ENSG00000180210	Tier 1	F2	11	46740730	46761056	1	coagulation factor II (thrombin) [Source:HGNC Symbol;Acc:3535]	5	Y	Y	N
ENSG00000180370	Tier 1	PAK2	3	196466728	196559518	1	p21 protein (Cdc42/Rac)-activated kinase 2 [Source:HGNC Symbol;Acc:8591]	0	Y	N	N
ENSG00000180432	Tier 1	CYP8B1	3	42897497	42917633	-1	cytochrome P450, family 8, subfamily B, polypeptide 1 [Source:HGNC Symbol;Acc:2653]	1	N	N	Y
ENSG00000180616	Tier 1	SSTR2	17	71161151	71167185	1	somatostatin receptor 2 [Source:HGNC Symbol;Acc:11331]	0	Y	Y	N
ENSG00000180638	Tier 1	SLC47A2	17	19581601	19622292	-1	solute carrier family 47 (multidrug and toxin extrusion), member 2 [Source:HGNC Symbol;Acc:26439]	0	Y	N	Y
ENSG00000180720	Tier 1	CHRM4	11	46406640	46408107	-1	cholinergic receptor, muscarinic 4 [Source:HGNC Symbol;Acc:1953]	0	Y	Y	N
ENSG00000180739	Tier 1	S1PR5	19	10623623	10628607	-1	sphingosine-1-phosphate receptor 5 [Source:HGNC Symbol;Acc:14299]	0	Y	Y	N
ENSG00000180767	Tier 1	CHST13	3	126243126	126262134	1	carbohydrate (chondroitin 4) sulfotransferase 13 [Source:HGNC Symbol;Acc:21755]	0	N	N	Y
ENSG00000180772	Tier 1	AGTR2	X	115301975	115306225	1	angiotensin II receptor, type 2 [Source:HGNC Symbol;Acc:338]	0	Y	Y	N
ENSG00000180815	Tier 1	MAP3K15	X	19378174	19533379	-1	mitogen-activated protein kinase kinase kinase 15 [Source:HGNC Symbol;Acc:31689]	0	Y	N	N
ENSG00000180871	Tier 1	CXCR2	2	218990012	219001976	1	chemokine (C-X-C motif) receptor 2 [Source:HGNC Symbol;Acc:6027]	2	Y	Y	N
ENSG00000180914	Tier 1	OXTR	3	8792094	8811314	-1	oxytocin receptor [Source:HGNC Symbol;Acc:8529]	0	Y	Y	N
ENSG00000181019	Tier 1	NQO1	16	69740899	69760854	-1	NAD(P)H dehydrogenase, quinone 1 [Source:HGNC Symbol;Acc:2874]	3	Y	N	N
ENSG00000181072	Tier 1	CHRM2	7	136553416	136705002	1	cholinergic receptor, muscarinic 2 [Source:HGNC Symbol;Acc:1951]	1	Y	Y	N
ENSG00000181085	Tier 1	MAPK15	8	144798429	144804628	1	mitogen-activated protein kinase 15 [Source:HGNC Symbol;Acc:24667]	0	Y	N	N
ENSG00000181104	Tier 1	F2R	5	76011868	76031606	1	coagulation factor II (thrombin) receptor [Source:HGNC Symbol;Acc:3537]	2	Y	Y	N
ENSG00000181143	Tier 1	MUC16	19	8959520	9092018	-1	mucin 16, cell surface associated [Source:HGNC Symbol;Acc:15582]	0	N	Y	N
ENSG00000181408	Tier 1	UTS2R	17	80332153	80333462	1	urotensin 2 receptor [Source:HGNC Symbol;Acc:4468]	0	Y	Y	N
ENSG00000181856	Tier 1	SLC2A4	17	7184986	7191576	1	solute carrier family 2 (facilitated glucose transporter), member 4 [Source:HGNC Symbol;Acc:11009]	1	N	Y	Y
ENSG00000182256	Tier 1	GABRG3	15	27216429	27778373	1	gamma-aminobutyric acid (GABA) A receptor, gamma 3 [Source:HGNC Symbol;Acc:4088]	1	Y	Y	N
ENSG00000182333	Tier 1	LIPF	10	90424198	90438571	1	lipase, gastric [Source:HGNC Symbol;Acc:6622]	0	Y	Y	N
ENSG00000182541	Tier 1	LIMK2	22	31608225	31676066	1	LIM domain kinase 2 [Source:HGNC Symbol;Acc:6614]	0	Y	N	N
ENSG00000182578	Tier 1	CSF1R	5	149432854	149492935	-1	colony stimulating factor 1 receptor [Source:HGNC Symbol;Acc:2433]	0	Y	Y	N
ENSG00000182580	Tier 1	EPHB3	3	184279572	184300197	1	EPH receptor B3 [Source:HGNC Symbol;Acc:3394]	0	Y	N	N
ENSG00000182782	Tier 1	HCAR2	12	123185840	123187890	-1	hydroxycarboxylic acid receptor 2 [Source:HGNC Symbol;Acc:24827]	0	Y	Y	N
ENSG00000182793	Tier 1	GSTA5	6	52696453	52710893	-1	glutathione S-transferase alpha 5 [Source:HGNC Symbol;Acc:19662]	0	N	N	Y
ENSG00000182866	Tier 1	LCK	1	32716840	32751766	1	lymphocyte-specific protein tyrosine kinase [Source:HGNC Symbol;Acc:6524]	0	Y	N	N
ENSG00000183044	Tier 1	ABAT	16	8768422	8878432	1	4-aminobutyrate aminotransferase [Source:HGNC Symbol;Acc:23]	0	Y	N	N
ENSG00000183049	Tier 1	CAMK1D	10	12391481	12877545	1	calcium/calmodulin-dependent protein kinase ID [Source:HGNC Symbol;Acc:19341]	0	Y	N	N
ENSG00000183134	Tier 1	PTGDR2	11	60618413	60623444	-1	prostaglandin D2 receptor 2 [Source:HGNC Symbol;Acc:4502]	0	Y	Y	N
ENSG00000183196	Tier 1	CHST6	16	75510949	75529282	-1	carbohydrate (N-acetylglucosamine 6-O) sulfotransferase 6 [Source:HGNC Symbol;Acc:6938]	3	N	N	Y
ENSG00000183317	Tier 1	EPHA10	1	38179552	38230805	-1	EPH receptor A10 [Source:HGNC Symbol;Acc:19987]	0	Y	Y	N
ENSG00000183421	Tier 1	RIPK4	21	43159529	43187266	-1	receptor-interacting serine-threonine kinase 4 [Source:HGNC Symbol;Acc:496]	0	Y	N	N
ENSG00000183454	Tier 1	GRIN2A	16	9852376	10276611	-1	glutamate receptor, ionotropic, N-methyl D-aspartate 2A [Source:HGNC Symbol;Acc:4585]	3	Y	N	N
ENSG00000183473	Tier 1	SSTR3	22	37600278	37608362	-1	somatostatin receptor 3 [Source:HGNC Symbol;Acc:11332]	1	Y	Y	N
ENSG00000183735	Tier 1	TBK1	12	64845660	64895888	1	TANK-binding kinase 1 [Source:HGNC Symbol;Acc:11584]	0	Y	N	N
ENSG00000183765	Tier 1	CHEK2	22	29083731	29138410	-1	checkpoint kinase 2 [Source:HGNC Symbol;Acc:16627]	7	Y	N	N
ENSG00000183813	Tier 1	CCR4	3	32993066	32997841	1	chemokine (C-C motif) receptor 4 [Source:HGNC Symbol;Acc:1605]	1	Y	Y	N
ENSG00000183873	Tier 1	SCN5A	3	38589548	38691164	-1	sodium channel, voltage-gated, type V, alpha subunit [Source:HGNC Symbol;Acc:10593]	17	Y	N	N
ENSG00000183943	Tier 1	PRKX	X	3522411	3631649	-1	protein kinase, X-linked [Source:HGNC Symbol;Acc:9441]	0	Y	N	N
ENSG00000184156	Tier 1	KCNQ3	8	133133108	133493200	-1	potassium voltage-gated channel, KQT-like subfamily, member 3 [Source:HGNC Symbol;Acc:6297]	0	Y	N	N
ENSG00000184160	Tier 1	ADRA2C	4	3768075	3770251	1	adrenoceptor alpha 2C [Source:HGNC Symbol;Acc:283]	0	Y	Y	N
ENSG00000184216	Tier 1	IRAK1	X	153275951	153285431	-1	interleukin-1 receptor-associated kinase 1 [Source:HGNC Symbol;Acc:6112]	3	Y	N	N
ENSG00000184254	Tier 1	ALDH1A3	15	101417919	101456831	1	aldehyde dehydrogenase 1 family, member A3 [Source:HGNC Symbol;Acc:409]	0	Y	N	Y
ENSG00000184304	Tier 1	PRKD1	14	30045687	30661104	-1	protein kinase D1 [Source:HGNC Symbol;Acc:9407]	2	Y	N	N
ENSG00000184343	Tier 1	SRPK3	X	153041867	153051187	1	SRSF protein kinase 3 [Source:HGNC Symbol;Acc:11402]	0	Y	N	N
ENSG00000184357	Tier 1	HIST1H1B	6	27834570	27835359	-1	histone cluster 1, H1b [Source:HGNC Symbol;Acc:4719]	7	N	Y	N
ENSG00000184371	Tier 1	CSF1	1	110452864	110473614	1	colony stimulating factor 1 (macrophage) [Source:HGNC Symbol;Acc:2432]	0	N	Y	N
ENSG00000184428	Tier 1	TOP1MT	8	144386554	144442149	-1	topoisomerase (DNA) I, mitochondrial [Source:HGNC Symbol;Acc:29787]	0	Y	N	N
ENSG00000184544	Tier 1	DHRS7C	17	9674751	9694614	-1	dehydrogenase/reductase (SDR family) member 7C [Source:HGNC Symbol;Acc:32423]	0	N	N	Y
ENSG00000184588	Tier 1	PDE4B	1	66258197	66840259	1	phosphodiesterase 4B, cAMP-specific [Source:HGNC Symbol;Acc:8781]	0	Y	N	N
ENSG00000184674	Tier 1	GSTT1	22	24376133	24384680	-1	glutathione S-transferase theta 1 [Source:HGNC Symbol;Acc:4641]	1	N	N	Y
ENSG00000184845	Tier 1	DRD1	5	174867042	174871211	-1	dopamine receptor D1 [Source:HGNC Symbol;Acc:3020]	0	Y	N	N
ENSG00000184937	Tier 1	WT1	11	32409321	32457176	-1	Wilms tumor 1 [Source:HGNC Symbol;Acc:12796]	0	N	Y	N
ENSG00000184984	Tier 1	CHRM5	15	34260921	34357291	1	cholinergic receptor, muscarinic 5 [Source:HGNC Symbol;Acc:1954]	0	Y	Y	N
ENSG00000184999	Tier 1	SLC22A10	11	62905339	63137190	1	solute carrier family 22, member 10 [Source:HGNC Symbol;Acc:18057]	0	Y	N	Y
ENSG00000185010	Tier 1	F8	X	154064063	154255215	-1	coagulation factor VIII, procoagulant component [Source:HGNC Symbol;Acc:3546]	11	N	Y	N
ENSG00000185015	Tier 1	CA13	8	86132816	86196302	1	carbonic anhydrase XIII [Source:HGNC Symbol;Acc:14914]	1	Y	N	N
ENSG00000185231	Tier 1	MC2R	18	13882043	13915706	-1	melanocortin 2 receptor (adrenocorticotropic hormone) [Source:HGNC Symbol;Acc:6930]	0	Y	Y	N
ENSG00000185291	Tier 1	IL3RA	X	1455509	1501578	1	interleukin 3 receptor, alpha (low affinity) [Source:HGNC Symbol;Acc:6012]	0	N	Y	N
ENSG00000185313	Tier 1	SCN10A	3	38738293	38835501	-1	sodium channel, voltage-gated, type X, alpha subunit [Source:HGNC Symbol;Acc:10582]	13	Y	N	N
ENSG00000185386	Tier 1	MAPK11	22	50702142	50709196	-1	mitogen-activated protein kinase 11 [Source:HGNC Symbol;Acc:6873]	0	Y	N	N
ENSG00000185499	Tier 1	MUC1	1	155158300	155162707	-1	mucin 1, cell surface associated [Source:HGNC Symbol;Acc:7508]	5	N	Y	N
ENSG00000185513	Tier 1	L3MBTL1	20	42136320	42179590	1	l(3)mbt-like 1 (Drosophila) [Source:HGNC Symbol;Acc:15905]	0	Y	N	N
ENSG00000185559	Tier 1	DLK1	14	101192042	101201539	1	delta-like 1 homolog (Drosophila) [Source:HGNC Symbol;Acc:2907]	0	Y	Y	N
ENSG00000185664	Tier 1	PMEL	12	56347889	56367101	-1	premelanosome protein [Source:HGNC Symbol;Acc:10880]	4	N	Y	N
ENSG00000185686	Tier 1	PRAME	22	22890123	22901768	-1	preferentially expressed antigen in melanoma [Source:HGNC Symbol;Acc:9336]	0	N	Y	N
ENSG00000185760	Tier 1	KCNQ5	6	73331520	73908574	1	potassium voltage-gated channel, KQT-like subfamily, member 5 [Source:HGNC Symbol;Acc:6299]	1	Y	N	N
ENSG00000185974	Tier 1	GRK1	13	114321470	114440708	1	G protein-coupled receptor kinase 1 [Source:HGNC Symbol;Acc:10013]	0	Y	N	N
ENSG00000186009	Tier 1	ATP4B	13	114303119	114312501	-1	ATPase, H+/K+ exchanging, beta polypeptide [Source:HGNC Symbol;Acc:820]	0	Y	N	N
ENSG00000186038	Tier 1	HTR3E	3	183814852	183824783	1	5-hydroxytryptamine (serotonin) receptor 3E, ionotropic [Source:HGNC Symbol;Acc:24005]	0	Y	N	N
ENSG00000186090	Tier 1	HTR3D	3	183749332	183757157	1	5-hydroxytryptamine (serotonin) receptor 3D, ionotropic [Source:HGNC Symbol;Acc:24004]	0	Y	N	N
ENSG00000186104	Tier 1	CYP2R1	11	14899553	14913798	-1	cytochrome P450, family 2, subfamily R, polypeptide 1 [Source:HGNC Symbol;Acc:20580]	5	Y	N	Y
ENSG00000186115	Tier 1	CYP4F2	19	15988833	16008930	-1	cytochrome P450, family 4, subfamily F, polypeptide 2 [Source:HGNC Symbol;Acc:2645]	5	Y	N	Y
ENSG00000186160	Tier 1	CYP4Z1	1	47533160	47583991	1	cytochrome P450, family 4, subfamily Z, polypeptide 1 [Source:HGNC Symbol;Acc:20583]	0	Y	N	Y
ENSG00000186204	Tier 1	CYP4F12	19	15783567	15807984	1	cytochrome P450, family 4, subfamily F, polypeptide 12 [Source:HGNC Symbol;Acc:18857]	0	Y	N	Y
ENSG00000186297	Tier 1	GABRA5	15	27111510	27194354	1	gamma-aminobutyric acid (GABA) A receptor, alpha 5 [Source:HGNC Symbol;Acc:4079]	0	Y	N	N
ENSG00000186318	Tier 1	BACE1	11	117156402	117186975	-1	beta-site APP-cleaving enzyme 1 [Source:HGNC Symbol;Acc:933]	0	Y	Y	N
ENSG00000186350	Tier 1	RXRA	9	137208944	137332431	1	retinoid X receptor, alpha [Source:HGNC Symbol;Acc:10477]	0	Y	N	Y
ENSG00000186526	Tier 1	CYP4F8	19	15726029	15741448	1	cytochrome P450, family 4, subfamily F, polypeptide 8 [Source:HGNC Symbol;Acc:2648]	0	N	N	Y
ENSG00000186529	Tier 1	CYP4F3	19	15751707	15773635	1	cytochrome P450, family 4, subfamily F, polypeptide 3 [Source:HGNC Symbol;Acc:2646]	0	Y	N	Y
ENSG00000186716	Tier 1	BCR	22	23521891	23660224	1	breakpoint cluster region [Source:HGNC Symbol;Acc:1014]	0	Y	N	N
ENSG00000186795	Tier 1	KCNK18	10	118957000	118969810	1	potassium channel, subfamily K, member 18 [Source:HGNC Symbol;Acc:19439]	0	Y	N	N
ENSG00000186803	Tier 1	IFNA10	9	21206180	21207142	-1	interferon, alpha 10 [Source:HGNC Symbol;Acc:5418]	0	N	Y	N
ENSG00000186827	Tier 1	TNFRSF4	1	1146706	1149518	-1	tumor necrosis factor receptor superfamily, member 4 [Source:HGNC Symbol;Acc:11918]	0	N	Y	N
ENSG00000186868	Tier 1	MAPT	17	43971748	44105700	1	microtubule-associated protein tau [Source:HGNC Symbol;Acc:6893]	19	Y	N	N
ENSG00000186891	Tier 1	TNFRSF18	1	1138888	1142071	-1	tumor necrosis factor receptor superfamily, member 18 [Source:HGNC Symbol;Acc:11914]	0	N	Y	N
ENSG00000186951	Tier 1	PPARA	22	46546424	46639653	1	peroxisome proliferator-activated receptor alpha [Source:HGNC Symbol;Acc:9232]	2	Y	N	Y
ENSG00000187010	Tier 1	RHD	1	25598884	25656936	1	Rh blood group, D antigen [Source:HGNC Symbol;Acc:10009]	8	N	Y	N
ENSG00000187048	Tier 1	CYP4A11	1	47394849	47407156	-1	cytochrome P450, family 4, subfamily A, polypeptide 11 [Source:HGNC Symbol;Acc:2642]	5	Y	N	Y
ENSG00000187134	Tier 1	AKR1C1	10	4934796	5025475	1	aldo-keto reductase family 1, member C1 [Source:HGNC Symbol;Acc:384]	0	Y	N	N
ENSG00000187258	Tier 1	NPSR1	7	34697851	34917944	1	neuropeptide S receptor 1 [Source:HGNC Symbol;Acc:23631]	0	Y	Y	N
ENSG00000187266	Tier 1	EPOR	19	11488236	11495018	-1	erythropoietin receptor [Source:HGNC Symbol;Acc:3416]	0	N	Y	N
ENSG00000187486	Tier 1	KCNJ11	11	17407406	17410878	-1	potassium inwardly-rectifying channel, subfamily J, member 11 [Source:HGNC Symbol;Acc:6257]	4	Y	Y	Y
ENSG00000187553	Tier 1	CYP26C1	10	94821021	94828454	1	cytochrome P450, family 26, subfamily C, polypeptide 1 [Source:HGNC Symbol;Acc:20577]	0	Y	N	Y
ENSG00000187630	Tier 1	DHRS4L2	14	24439148	24475617	1	dehydrogenase/reductase (SDR family) member 4 like 2 [Source:HGNC Symbol;Acc:19731]	0	N	N	Y
ENSG00000187758	Tier 1	ADH1A	4	100197524	100212185	-1	alcohol dehydrogenase 1A (class I), alpha polypeptide [Source:HGNC Symbol;Acc:249]	5	Y	N	Y
ENSG00000187837	Tier 1	HIST1H1C	6	26055968	26056699	-1	histone cluster 1, H1c [Source:HGNC Symbol;Acc:4716]	40	N	Y	N
ENSG00000188130	Tier 1	MAPK12	22	50683879	50700254	-1	mitogen-activated protein kinase 12 [Source:HGNC Symbol;Acc:6874]	0	Y	N	N
ENSG00000188229	Tier 1	TUBB4B	9	140135665	140138159	1	tubulin, beta 4B class IVb [Source:HGNC Symbol;Acc:20771]	0	Y	Y	N
ENSG00000188257	Tier 1	PLA2G2A	1	20301925	20306932	-1	phospholipase A2, group IIA (platelets, synovial fluid) [Source:HGNC Symbol;Acc:9031]	0	Y	Y	N
ENSG00000188379	Tier 1	IFNA2	9	21384254	21385396	-1	interferon, alpha 2 [Source:HGNC Symbol;Acc:5423]	0	N	Y	N
ENSG00000188389	Tier 1	PDCD1	2	242792033	242801060	-1	programmed cell death 1 [Source:HGNC Symbol;Acc:8760]	0	N	Y	N
ENSG00000188404	Tier 1	SELL	1	169659808	169680839	-1	selectin L [Source:HGNC Symbol;Acc:10720]	1	Y	Y	N
ENSG00000188641	Tier 1	DPYD	1	97543299	98386605	-1	dihydropyrimidine dehydrogenase [Source:HGNC Symbol;Acc:3012]	5	Y	N	Y
ENSG00000188778	Tier 1	ADRB3	8	37820516	37824483	-1	adrenoceptor beta 3 [Source:HGNC Symbol;Acc:288]	0	Y	Y	N
ENSG00000188784	Tier 1	PLA2G2E	1	20246502	20250110	-1	phospholipase A2, group IIE [Source:HGNC Symbol;Acc:13414]	0	Y	Y	N
ENSG00000188822	Tier 1	CNR2	1	24197016	24285549	-1	cannabinoid receptor 2 (macrophage) [Source:HGNC Symbol;Acc:2160]	0	Y	Y	N
ENSG00000188906	Tier 1	LRRK2	12	40590546	40763087	1	leucine-rich repeat kinase 2 [Source:HGNC Symbol;Acc:18618]	8	Y	N	N
ENSG00000189013	Tier 1	KIR2DL4	19	55236002	55325972	1	killer cell immunoglobulin-like receptor, two domains, long cytoplasmic tail, 4 [Source:HGNC Symbol;Acc:6332]	0	N	Y	N
ENSG00000189060	Tier 1	H1F0	22	38201114	38203442	1	H1 histone family, member 0 [Source:HGNC Symbol;Acc:4714]	1	N	Y	N
ENSG00000189091	Tier 1	SF3B3	16	70557691	70608820	1	splicing factor 3b, subunit 3, 130kDa [Source:HGNC Symbol;Acc:10770]	0	Y	N	N
ENSG00000189221	Tier 1	MAOA	X	43515467	43606068	1	monoamine oxidase A [Source:HGNC Symbol;Acc:6833]	0	Y	N	Y
ENSG00000196126	Tier 1	HLA-DRB1	6	32546546	32557625	-1	major histocompatibility complex, class II, DR beta 1 [Source:HGNC Symbol;Acc:4948]	127	N	Y	N
ENSG00000196132	Tier 1	MYT1	20	62783144	62873604	1	myelin transcription factor 1 [Source:HGNC Symbol;Acc:7622]	0	Y	N	N
ENSG00000196139	Tier 1	AKR1C3	10	5077546	5149878	1	aldo-keto reductase family 1, member C3 [Source:HGNC Symbol;Acc:386]	4	Y	N	N
ENSG00000196188	Tier 1	CTSE	1	206317459	206332104	1	cathepsin E [Source:HGNC Symbol;Acc:2530]	0	Y	Y	N
ENSG00000196218	Tier 1	RYR1	19	38924339	39078204	1	ryanodine receptor 1 (skeletal) [Source:HGNC Symbol;Acc:10483]	0	Y	N	N
ENSG00000196230	Tier 1	TUBB	6	30687978	30693203	1	tubulin, beta class I [Source:HGNC Symbol;Acc:20778]	12	Y	Y	N
ENSG00000196262	Tier 1	PPIA	7	44836279	44864163	1	peptidylprolyl isomerase A (cyclophilin A) [Source:HGNC Symbol;Acc:9253]	0	Y	Y	N
ENSG00000196305	Tier 1	IARS	9	94972489	95056038	-1	isoleucyl-tRNA synthetase [Source:HGNC Symbol;Acc:5330]	0	Y	N	N
ENSG00000196344	Tier 1	ADH7	4	100333418	100356894	-1	alcohol dehydrogenase 7 (class IV), mu or sigma polypeptide [Source:HGNC Symbol;Acc:256]	1	Y	Y	Y
ENSG00000196352	Tier 1	CD55	1	207494853	207534311	1	CD55 molecule, decay accelerating factor for complement (Cromer blood group) [Source:HGNC Symbol;Acc:2665]	0	N	Y	N
ENSG00000196411	Tier 1	EPHB4	7	100400187	100425121	-1	EPH receptor B4 [Source:HGNC Symbol;Acc:3395]	3	Y	N	N
ENSG00000196468	Tier 1	FGF16	X	76709648	76712769	1	fibroblast growth factor 16 [Source:HGNC Symbol;Acc:3672]	0	Y	Y	N
ENSG00000196498	Tier 1	NCOR2	12	124808961	125052135	-1	nuclear receptor corepressor 2 [Source:HGNC Symbol;Acc:7673]	0	Y	N	N
ENSG00000196502	Tier 1	SULT1A1	16	28616903	28634946	-1	sulfotransferase family, cytosolic, 1A, phenol-preferring, member 1 [Source:HGNC Symbol;Acc:11453]	12	N	N	Y
ENSG00000196517	Tier 1	SLC6A9	1	44457172	44497139	-1	solute carrier family 6 (neurotransmitter transporter, glycine), member 9 [Source:HGNC Symbol;Acc:11056]	0	Y	N	N
ENSG00000196549	Tier 1	MME	3	154741913	154901497	1	membrane metallo-endopeptidase [Source:HGNC Symbol;Acc:7154]	0	Y	Y	N
ENSG00000196557	Tier 1	CACNA1H	16	1203241	1271771	1	calcium channel, voltage-dependent, T type, alpha 1H subunit [Source:HGNC Symbol;Acc:1395]	0	Y	N	N
ENSG00000196569	Tier 1	LAMA2	6	129204342	129837714	1	laminin, alpha 2 [Source:HGNC Symbol;Acc:6482]	2	N	Y	N
ENSG00000196591	Tier 1	HDAC2	6	114254192	114332472	-1	histone deacetylase 2 [Source:HGNC Symbol;Acc:4853]	0	Y	N	N
ENSG00000196611	Tier 1	MMP1	11	102660651	102668891	-1	matrix metallopeptidase 1 (interstitial collagenase) [Source:HGNC Symbol;Acc:7155]	0	Y	Y	N
ENSG00000196616	Tier 1	ADH1B	4	100226121	100242558	-1	alcohol dehydrogenase 1B (class I), beta polypeptide [Source:HGNC Symbol;Acc:250]	5	Y	N	Y
ENSG00000196620	Tier 1	UGT2B15	4	69512348	69536346	-1	UDP glucuronosyltransferase 2 family, polypeptide B15 [Source:HGNC Symbol;Acc:12546]	1	N	N	Y
ENSG00000196639	Tier 1	HRH1	3	11178779	11305243	1	histamine receptor H1 [Source:HGNC Symbol;Acc:5182]	0	Y	N	N
ENSG00000196664	Tier 1	TLR7	X	12885202	12908499	1	toll-like receptor 7 [Source:HGNC Symbol;Acc:15631]	0	Y	N	N
ENSG00000196689	Tier 1	TRPV1	17	3468738	3500392	-1	transient receptor potential cation channel, subfamily V, member 1 [Source:HGNC Symbol;Acc:12716]	0	Y	N	N
ENSG00000196730	Tier 1	DAPK1	9	90112143	90323548	1	death-associated protein kinase 1 [Source:HGNC Symbol;Acc:2674]	0	Y	N	N
ENSG00000196811	Tier 1	CHRNG	2	233404437	233411113	1	cholinergic receptor, nicotinic, gamma (muscle) [Source:HGNC Symbol;Acc:1967]	2	Y	N	N
ENSG00000196839	Tier 1	ADA	20	43248163	43280874	-1	adenosine deaminase [Source:HGNC Symbol;Acc:186]	0	Y	Y	N
ENSG00000196876	Tier 1	SCN8A	12	51984050	52206648	1	sodium channel, voltage gated, type VIII, alpha subunit [Source:HGNC Symbol;Acc:10596]	0	Y	N	N
ENSG00000196878	Tier 1	LAMB3	1	209788215	209825811	-1	laminin, beta 3 [Source:HGNC Symbol;Acc:6490]	0	N	Y	N
ENSG00000197122	Tier 1	SRC	20	35973088	36034453	1	v-src avian sarcoma (Schmidt-Ruppin A-2) viral oncogene homolog [Source:HGNC Symbol;Acc:11283]	0	Y	N	N
ENSG00000197150	Tier 1	ABCB8	7	150725510	150744869	1	ATP-binding cassette, sub-family B (MDR/TAP), member 8 [Source:HGNC Symbol;Acc:49]	0	Y	N	Y
ENSG00000197165	Tier 1	SULT1A2	16	28603264	28608430	-1	sulfotransferase family, cytosolic, 1A, phenol-preferring, member 2 [Source:HGNC Symbol;Acc:11454]	12	N	N	Y
ENSG00000197208	Tier 1	SLC22A4	5	131630136	131679899	1	solute carrier family 22 (organic cation/zwitterion transporter), member 4 [Source:HGNC Symbol;Acc:10968]	21	Y	N	Y
ENSG00000197299	Tier 1	BLM	15	91260558	91358859	1	Bloom syndrome, RecQ helicase-like [Source:HGNC Symbol;Acc:1058]	0	Y	N	N
ENSG00000197375	Tier 1	SLC22A5	5	131705444	131731306	1	solute carrier family 22 (organic cation/carnitine transporter), member 5 [Source:HGNC Symbol;Acc:10969]	21	Y	N	Y
ENSG00000197386	Tier 1	HTT	4	3076408	3245676	1	huntingtin [Source:HGNC Symbol;Acc:4851]	0	Y	N	N
ENSG00000197408	Tier 1	CYP2B6	19	41497204	41524303	1	cytochrome P450, family 2, subfamily B, polypeptide 6 [Source:HGNC Symbol;Acc:2615]	0	Y	N	Y
ENSG00000197442	Tier 1	MAP3K5	6	136878185	137113656	-1	mitogen-activated protein kinase kinase kinase 5 [Source:HGNC Symbol;Acc:6857]	0	Y	N	N
ENSG00000197446	Tier 1	CYP2F1	19	41620337	41634271	1	cytochrome P450, family 2, subfamily F, polypeptide 1 [Source:HGNC Symbol;Acc:2632]	0	Y	N	Y
ENSG00000197448	Tier 1	GSTK1	7	142941186	142967947	1	glutathione S-transferase kappa 1 [Source:HGNC Symbol;Acc:16906]	0	Y	Y	Y
ENSG00000197506	Tier 1	SLC28A3	9	86890372	86955672	-1	solute carrier family 28 (concentrative nucleoside transporter), member 3 [Source:HGNC Symbol;Acc:16484]	0	N	N	Y
ENSG00000197561	Tier 1	ELANE	19	851014	856242	1	elastase, neutrophil expressed [Source:HGNC Symbol;Acc:3309]	0	Y	Y	N
ENSG00000197616	Tier 1	MYH6	14	23851199	23877486	-1	myosin, heavy chain 6, cardiac muscle, alpha [Source:HGNC Symbol;Acc:7576]	3	N	Y	N
ENSG00000197635	Tier 1	DPP4	2	162848751	162931052	-1	dipeptidyl-peptidase 4 [Source:HGNC Symbol;Acc:3009]	2	Y	Y	N
ENSG00000197646	Tier 1	PDCD1LG2	9	5510545	5571282	1	programmed cell death 1 ligand 2 [Source:HGNC Symbol;Acc:18731]	0	N	Y	N
ENSG00000197766	Tier 1	CFD	19	859453	863453	1	complement factor D (adipsin) [Source:HGNC Symbol;Acc:2771]	0	N	Y	N
ENSG00000197838	Tier 1	CYP2A13	19	41594377	41602100	1	cytochrome P450, family 2, subfamily A, polypeptide 13 [Source:HGNC Symbol;Acc:2608]	0	Y	N	Y
ENSG00000197888	Tier 1	UGT2B17	4	69402902	69434245	-1	UDP glucuronosyltransferase 2 family, polypeptide B17 [Source:HGNC Symbol;Acc:12547]	0	N	N	Y
ENSG00000197891	Tier 1	SLC22A12	11	64358113	64369820	1	solute carrier family 22 (organic anion/urate transporter), member 12 [Source:HGNC Symbol;Acc:17989]	7	Y	N	Y
ENSG00000197894	Tier 1	ADH5	4	99992132	100009952	-1	alcohol dehydrogenase 5 (class III), chi polypeptide [Source:HGNC Symbol;Acc:253]	0	Y	N	Y
ENSG00000197901	Tier 1	SLC22A6	11	62703857	62752455	-1	solute carrier family 22 (organic anion transporter), member 6 [Source:HGNC Symbol;Acc:10970]	0	Y	N	Y
ENSG00000197919	Tier 1	IFNA1	9	21440440	21441315	1	interferon, alpha 1 [Source:HGNC Symbol;Acc:5417]	0	N	Y	N
ENSG00000198001	Tier 1	IRAK4	12	44152747	44183346	1	interleukin-1 receptor-associated kinase 4 [Source:HGNC Symbol;Acc:17967]	1	Y	N	N
ENSG00000198049	Tier 1	AVPR1B	1	206223976	206231639	1	arginine vasopressin receptor 1B [Source:HGNC Symbol;Acc:896]	0	Y	Y	N
ENSG00000198074	Tier 1	AKR1B10	7	134212344	134226160	1	aldo-keto reductase family 1, member B10 (aldose reductase) [Source:HGNC Symbol;Acc:382]	0	Y	Y	N
ENSG00000198077	Tier 1	CYP2A7	19	41381344	41388657	-1	cytochrome P450, family 2, subfamily A, polypeptide 7 [Source:HGNC Symbol;Acc:2611]	0	Y	N	Y
ENSG00000198099	Tier 1	ADH4	4	100044808	100078949	-1	alcohol dehydrogenase 4 (class II), pi polypeptide [Source:HGNC Symbol;Acc:252]	3	Y	N	Y
ENSG00000198121	Tier 1	LPAR1	9	113635543	113800981	-1	lysophosphatidic acid receptor 1 [Source:HGNC Symbol;Acc:3166]	2	Y	Y	N
ENSG00000198189	Tier 1	HSD17B11	4	88257762	88312538	-1	hydroxysteroid (17-beta) dehydrogenase 11 [Source:HGNC Symbol;Acc:22960]	0	N	N	Y
ENSG00000198203	Tier 1	SULT1C2	2	108905095	108926371	1	sulfotransferase family, cytosolic, 1C, member 2 [Source:HGNC Symbol;Acc:11456]	0	N	N	Y
ENSG00000198223	Tier 1	CSF2RA	X	1387693	1429274	1	colony stimulating factor 2 receptor, alpha, low-affinity (granulocyte-macrophage) [Source:HGNC Symbol;Acc:2435]	0	N	Y	N
ENSG00000198355	Tier 1	PIM3	22	50354161	50357728	1	pim-3 oncogene [Source:HGNC Symbol;Acc:19310]	1	Y	N	N
ENSG00000198400	Tier 1	NTRK1	1	156785432	156851642	1	neurotrophic tyrosine kinase, receptor, type 1 [Source:HGNC Symbol;Acc:8031]	0	Y	N	N
ENSG00000198431	Tier 1	TXNRD1	12	104609557	104744061	1	thioredoxin reductase 1 [Source:HGNC Symbol;Acc:12437]	0	Y	N	N
ENSG00000198502	Tier 1	HLA-DRB5	6	32485120	32498064	-1	major histocompatibility complex, class II, DR beta 5 [Source:HGNC Symbol;Acc:4953]	120	N	Y	N
ENSG00000198598	Tier 1	MMP17	12	132312938	132336328	1	matrix metallopeptidase 17 (membrane-inserted) [Source:HGNC Symbol;Acc:7163]	0	Y	Y	N
ENSG00000198691	Tier 1	ABCA4	1	94458393	94586688	-1	ATP-binding cassette, sub-family A (ABC1), member 4 [Source:HGNC Symbol;Acc:34]	2	Y	Y	Y
ENSG00000198704	Tier 1	GPX6	6	28471073	28495992	-1	glutathione peroxidase 6 (olfactory) [Source:HGNC Symbol;Acc:4558]	8	N	Y	Y
ENSG00000198734	Tier 1	F5	1	169483404	169555826	-1	coagulation factor V (proaccelerin, labile factor) [Source:HGNC Symbol;Acc:3542]	8	N	Y	N
ENSG00000198785	Tier 1	GRIN3A	9	104331635	104500862	-1	glutamate receptor, ionotropic, N-methyl-D-aspartate 3A [Source:HGNC Symbol;Acc:16767]	0	Y	N	N
ENSG00000198793	Tier 1	MTOR	1	11166592	11322564	-1	mechanistic target of rapamycin (serine/threonine kinase) [Source:HGNC Symbol;Acc:3942]	2	Y	N	N
ENSG00000198805	Tier 1	PNP	14	20937113	20945253	1	purine nucleoside phosphorylase [Source:HGNC Symbol;Acc:7892]	0	Y	N	N
ENSG00000198822	Tier 1	GRM3	7	86273230	86494200	1	glutamate receptor, metabotropic 3 [Source:HGNC Symbol;Acc:4595]	1	Y	N	N
ENSG00000198838	Tier 1	RYR3	15	33603163	34158303	1	ryanodine receptor 3 [Source:HGNC Symbol;Acc:10485]	1	Y	N	N
ENSG00000198848	Tier 1	CES1	16	55836763	55867249	-1	carboxylesterase 1 [Source:HGNC Symbol;Acc:1863]	0	Y	Y	Y
ENSG00000198851	Tier 1	CD3E	11	118175260	118186890	1	CD3e molecule, epsilon (CD3-TCR complex) [Source:HGNC Symbol;Acc:1674]	0	N	Y	N
ENSG00000198900	Tier 1	TOP1	20	39657458	39753127	1	topoisomerase (DNA) I [Source:HGNC Symbol;Acc:11986]	4	Y	N	N
ENSG00000198909	Tier 1	MAP3K3	17	61699775	61773663	1	mitogen-activated protein kinase kinase kinase 3 [Source:HGNC Symbol;Acc:6855]	5	Y	N	N
ENSG00000198947	Tier 1	DMD	X	31115794	33357558	-1	dystrophin [Source:HGNC Symbol;Acc:2928]	0	N	Y	N
ENSG00000203797	Tier 1	DDO	6	110712974	110736765	-1	D-aspartate oxidase [Source:HGNC Symbol;Acc:2727]	0	Y	N	Y
ENSG00000203859	Tier 1	HSD3B2	1	119957554	119965658	1	hydroxy-delta-5-steroid dehydrogenase, 3 beta- and steroid delta-isomerase 2 [Source:HGNC Symbol;Acc:5218]	1	Y	N	N
ENSG00000204231	Tier 1	RXRB	6	33161365	33168630	-1	retinoid X receptor, beta [Source:HGNC Symbol;Acc:10478]	1	Y	N	N
ENSG00000204264	Tier 1	PSMB8	6	32808494	32812480	-1	proteasome (prosome, macropain) subunit, beta type, 8 [Source:HGNC Symbol;Acc:9545]	6	Y	N	N
ENSG00000204287	Tier 1	HLA-DRA	6	32407619	32412823	1	major histocompatibility complex, class II, DR alpha [Source:HGNC Symbol;Acc:4947]	100	N	Y	N
ENSG00000204385	Tier 1	SLC44A4	6	31830969	31846823	-1	solute carrier family 44, member 4 [Source:HGNC Symbol;Acc:13941]	60	N	Y	N
ENSG00000204427	Tier 1	ABHD16A	6	31654726	31671221	-1	abhydrolase domain containing 16A [Source:HGNC Symbol;Acc:13921]	56	Y	N	N
ENSG00000204580	Tier 1	DDR1	6	30844198	30867933	1	discoidin domain receptor tyrosine kinase 1 [Source:HGNC Symbol;Acc:2730]	19	Y	Y	N
ENSG00000204681	Tier 1	GABBR1	6	29523406	29601753	-1	gamma-aminobutyric acid (GABA) B receptor, 1 [Source:HGNC Symbol;Acc:4070]	4	Y	Y	N
ENSG00000204983	Tier 1	PRSS1	7	142457319	142460923	1	protease, serine, 1 (trypsin 1) [Source:HGNC Symbol;Acc:9475]	1	Y	Y	N
ENSG00000205155	Tier 1	PSENEN	19	36236015	36237911	1	presenilin enhancer gamma secretase subunit [Source:HGNC Symbol;Acc:30100]	0	Y	N	N
ENSG00000205268	Tier 1	PDE7A	8	66629745	66754557	-1	phosphodiesterase 7A [Source:HGNC Symbol;Acc:8791]	0	Y	N	N
ENSG00000205359	Tier 1	SLCO6A1	5	101707486	101834720	-1	solute carrier organic anion transporter family, member 6A1 [Source:HGNC Symbol;Acc:23613]	2	N	N	Y
ENSG00000205571	Tier 1	SMN2	5	69345350	69374349	1	survival of motor neuron 2, centromeric [Source:HGNC Symbol;Acc:11118]	0	Y	N	N
ENSG00000205755	Tier 1	CRLF2	X	1314890	1331616	-1	cytokine receptor-like factor 2 [Source:HGNC Symbol;Acc:14281]	0	N	Y	N
ENSG00000206503	Tier 1	HLA-A	6	29909037	29913661	1	major histocompatibility complex, class I, A [Source:HGNC Symbol;Acc:4931]	20	Y	Y	N
ENSG00000211445	Tier 1	GPX3	5	150400124	150408554	1	glutathione peroxidase 3 (plasma) [Source:HGNC Symbol;Acc:4555]	0	N	Y	Y
ENSG00000211452	Tier 1	DIO1	1	54356912	54376759	1	deiodinase, iodothyronine, type I [Source:HGNC Symbol;Acc:2883]	3	Y	N	N
ENSG00000211699	Tier 1	TRGV3	7	38398113	38398763	-1	T cell receptor gamma variable 3 [Source:HGNC Symbol;Acc:12288]	0	N	Y	N
ENSG00000211707	Tier 1	TRBV7-1	7	142032006	142032527	1	T cell receptor beta variable 7-1 (non-functional) [Source:HGNC Symbol;Acc:12235]	0	N	Y	N
ENSG00000211810	Tier 1	TRAV29DV5	14	22631134	22631766	1	T cell receptor alpha variable 29/delta variable 5 (gene/pseudogene) [Source:HGNC Symbol;Acc:12127]	0	N	Y	N
ENSG00000211891	Tier 1	IGHE	14	106064224	106068065	-1	immunoglobulin heavy constant epsilon [Source:HGNC Symbol;Acc:5522]	0	N	Y	N
ENSG00000212122	Tier 1	TSSK1B	5	112768251	112770728	-1	testis-specific serine kinase 1B [Source:HGNC Symbol;Acc:14968]	0	Y	N	N
ENSG00000213341	Tier 1	CHUK	10	101948055	101989376	-1	conserved helix-loop-helix ubiquitous kinase [Source:HGNC Symbol;Acc:1974]	1	Y	N	N
ENSG00000213366	Tier 1	GSTM2	1	110210644	110252171	1	glutathione S-transferase mu 2 (muscle) [Source:HGNC Symbol;Acc:4634]	1	N	N	Y
ENSG00000213694	Tier 1	S1PR3	9	91606362	91619925	1	sphingosine-1-phosphate receptor 3 [Source:HGNC Symbol;Acc:3167]	0	Y	Y	N
ENSG00000213759	Tier 1	UGT2B11	4	70065669	70080449	-1	UDP glucuronosyltransferase 2 family, polypeptide B11 [Source:HGNC Symbol;Acc:12545]	0	N	N	Y
ENSG00000213903	Tier 1	LTB4R	14	24780656	24787242	1	leukotriene B4 receptor [Source:HGNC Symbol;Acc:6713]	1	Y	Y	N
ENSG00000213923	Tier 1	CSNK1E	22	38686697	38794527	-1	casein kinase 1, epsilon [Source:HGNC Symbol;Acc:2453]	0	Y	N	N
ENSG00000214042	Tier 1	IFNA7	9	21201468	21202204	-1	interferon, alpha 7 [Source:HGNC Symbol;Acc:5428]	0	N	Y	N
ENSG00000214102	Tier 1	WEE2	7	141408153	141431071	1	WEE1 homolog 2 (S. pombe) [Source:HGNC Symbol;Acc:19684]	0	Y	N	N
ENSG00000215182	Tier 1	MUC5AC	11	1151580	1222364	1	mucin 5AC, oligomeric mucus/gel-forming [Source:HGNC Symbol;Acc:7515]	0	N	Y	N
ENSG00000215644	Tier 1	GCGR	17	79762008	79771889	1	glucagon receptor [Source:HGNC Symbol;Acc:4192]	0	Y	Y	N
ENSG00000220205	Tier 1	VAMP2	17	8062467	8066864	-1	vesicle-associated membrane protein 2 (synaptobrevin 2) [Source:HGNC Symbol;Acc:12643]	1	N	Y	N
ENSG00000221867	Tier 1	MAGEA3	X	151934652	151938240	-1	melanoma antigen family A, 3 [Source:HGNC Symbol;Acc:6801]	0	N	Y	N
ENSG00000222040	Tier 1	ADRA2B	2	96778707	96781984	-1	adrenoceptor alpha 2B [Source:HGNC Symbol;Acc:282]	0	Y	Y	N
ENSG00000226979	Tier 1	LTA	6	31539831	31542101	1	lymphotoxin alpha [Source:HGNC Symbol;Acc:6709]	35	N	Y	N
ENSG00000227507	Tier 1	LTB	6	31548302	31550299	-1	lymphotoxin beta (TNF superfamily, member 3) [Source:HGNC Symbol;Acc:6711]	34	N	Y	N
ENSG00000228716	Tier 1	DHFR	5	79922047	79950802	-1	dihydrofolate reductase [Source:HGNC Symbol;Acc:2861]	0	Y	N	N
ENSG00000229164	Tier 1	TRAC	14	23016447	23021097	1	T cell receptor alpha constant [Source:HGNC Symbol;Acc:12029]	2	N	Y	N
ENSG00000232810	Tier 1	TNF	6	31543344	31546113	1	tumor necrosis factor [Source:HGNC Symbol;Acc:11892]	35	Y	Y	N
ENSG00000233276	Tier 1	GPX1	3	49394609	49396033	-1	glutathione peroxidase 1 [Source:HGNC Symbol;Acc:4553]	11	N	N	Y
ENSG00000236637	Tier 1	IFNA4	9	21186617	21187598	-1	interferon, alpha 4 [Source:HGNC Symbol;Acc:5425]	0	N	Y	N
ENSG00000239697	Tier 1	TNFSF12	17	7452208	7464925	1	tumor necrosis factor (ligand) superfamily, member 12 [Source:HGNC Symbol;Acc:11927]	19	N	Y	N
ENSG00000239732	Tier 1	TLR9	3	52255096	52273183	-1	toll-like receptor 9 [Source:HGNC Symbol;Acc:15633]	6	Y	Y	N
ENSG00000240224	Tier 1	UGT1A5	2	234621638	234681945	1	UDP glucuronosyltransferase 1 family, polypeptide A5 [Source:HGNC Symbol;Acc:12537]	32	N	N	Y
ENSG00000241119	Tier 1	UGT1A9	2	234580499	234681946	1	UDP glucuronosyltransferase 1 family, polypeptide A9 [Source:HGNC Symbol;Acc:12541]	32	N	N	Y
ENSG00000241186	Tier 1	TDGF1	3	46616045	46668033	1	teratocarcinoma-derived growth factor 1 [Source:HGNC Symbol;Acc:11701]	0	N	Y	N
ENSG00000241635	Tier 1	UGT1A8	2	234526291	234681956	1	UDP glucuronosyltransferase 1 family, polypeptide A8 [Source:HGNC Symbol;Acc:12540]	32	N	N	Y
ENSG00000242366	Tier 1	UGT1A1	2	234668894	234681945	1	UDP glucuronosyltransferase 1 family, polypeptide A1 [Source:HGNC Symbol;Acc:12530]	32	N	N	Y
ENSG00000242515	Tier 1	UGT1A10	2	234545100	234681951	1	UDP glucuronosyltransferase 1 family, polypeptide A10 [Source:HGNC Symbol;Acc:12531]	32	N	N	Y
ENSG00000243135	Tier 1	UGT1A3	2	234637754	234681945	1	UDP glucuronosyltransferase 1 family, polypeptide A3 [Source:HGNC Symbol;Acc:12535]	32	N	N	Y
ENSG00000243480	Tier 1	AMY2A	1	104159999	104168402	1	amylase, alpha 2A (pancreatic) [Source:HGNC Symbol;Acc:477]	0	Y	Y	N
ENSG00000243772	Tier 1	KIR2DL3	19	55249980	55295776	1	killer cell immunoglobulin-like receptor, two domains, long cytoplasmic tail, 3 [Source:HGNC Symbol;Acc:6331]	0	N	Y	N
ENSG00000243955	Tier 1	GSTA1	6	52656462	52668708	-1	glutathione S-transferase alpha 1 [Source:HGNC Symbol;Acc:4626]	0	Y	N	Y
ENSG00000244067	Tier 1	GSTA2	6	52614897	52628367	-1	glutathione S-transferase alpha 2 [Source:HGNC Symbol;Acc:4627]	0	N	N	Y
ENSG00000244122	Tier 1	UGT1A7	2	234590584	234681945	1	UDP glucuronosyltransferase 1 family, polypeptide A7 [Source:HGNC Symbol;Acc:12539]	32	N	N	Y
ENSG00000244474	Tier 1	UGT1A4	2	234627424	234681945	1	UDP glucuronosyltransferase 1 family, polypeptide A4 [Source:HGNC Symbol;Acc:12536]	32	N	N	Y
ENSG00000248144	Tier 1	ADH1C	4	100257649	100274184	-1	alcohol dehydrogenase 1C (class I), gamma polypeptide [Source:HGNC Symbol;Acc:251]	0	Y	N	Y
ENSG00000254087	Tier 1	LYN	8	56792372	56923940	1	v-yes-1 Yamaguchi sarcoma viral related oncogene homolog [Source:HGNC Symbol;Acc:6735]	0	Y	N	N
ENSG00000255974	Tier 1	CYP2A6	19	41349443	41356352	-1	cytochrome P450, family 2, subfamily A, polypeptide 6 [Source:HGNC Symbol;Acc:2610]	3	Y	N	Y
ENSG00000256713	Tier 1	PGA5	11	61008514	61018920	1	pepsinogen 5, group I (pepsinogen A) [Source:HGNC Symbol;Acc:8887]	0	Y	Y	N
ENSG00000257335	Tier 1	MGAM	7	141607613	141806547	1	maltase-glucoamylase (alpha-glucosidase) [Source:HGNC Symbol;Acc:7043]	3	Y	N	N
ENSG00000257365	Tier 1	FNTB	14	65381203	65529368	1	farnesyltransferase, CAAX box, beta [Source:HGNC Symbol;Acc:3785]	1	Y	N	N
ENSG00000258429	Tier 1	PDF	16	69362524	69364498	-1	peptide deformylase (mitochondrial) [Source:HGNC Symbol;Acc:30012]	0	Y	N	N
ENSG00000258839	Tier 1	MC1R	16	89978527	89987385	1	melanocortin 1 receptor (alpha melanocyte stimulating hormone receptor) [Source:HGNC Symbol;Acc:6929]	17	Y	Y	N
ENSG00000258947	Tier 1		16	89987800	90005169	1	Tubulin beta-3 chain [Source:UniProtKB/Swiss-Prot;Acc:Q13509]	17	Y	Y	N
ENSG00000259207	Tier 1	ITGB3	17	45331212	45421658	1	integrin, beta 3 (platelet glycoprotein IIIa, antigen CD61) [Source:HGNC Symbol;Acc:6156]	2	Y	Y	N
ENSG00000261052	Tier 1	SULT1A3	16	30205754	30215631	1	sulfotransferase family, cytosolic, 1A, phenol-preferring, member 3 [Source:HGNC Symbol;Acc:11455]	0	N	N	Y
ENSG00000267534	Tier 1	S1PR2	19	10334520	10341948	-1	sphingosine-1-phosphate receptor 2 [Source:HGNC Symbol;Acc:3169]	0	Y	N	N
ENSG00000269858	Tier 1	EGLN2	19	41304901	41314338	1	egl-9 family hypoxia-inducible factor 2 [Source:HGNC Symbol;Acc:14660]	4	Y	N	N
ENSG00000270024	Tier 1	C8orf44-SGK3	8	67579831	67772707	1	C8orf44-SGK3 readthrough [Source:HGNC Symbol;Acc:48354]	0	Y	N	N
ENSG00000273079	Tier 1	GRIN2B	12	13693165	14133053	-1	glutamate receptor, ionotropic, N-methyl D-aspartate 2B [Source:HGNC Symbol;Acc:4586]	1	Y	N	N
ENSG00000001036	Tier 2	FUCA2	6	143815948	143832827	-1	fucosidase, alpha-L- 2, plasma [Source:HGNC Symbol;Acc:4008]	0	Y	Y	N
ENSG00000001084	Tier 2	GCLC	6	53362139	53481768	-1	glutamate-cysteine ligase, catalytic subunit [Source:HGNC Symbol;Acc:4311]	0	Y	N	N
ENSG00000002330	Tier 2	BAD	11	64037302	64052176	-1	BCL2-associated agonist of cell death [Source:HGNC Symbol;Acc:936]	4	Y	N	N
ENSG00000002726	Tier 2	AOC1	7	150521715	150558592	1	amine oxidase, copper containing 1 [Source:HGNC Symbol;Acc:80]	5	Y	Y	N
ENSG00000004487	Tier 2	KDM1A	1	23345941	23410182	1	lysine (K)-specific demethylase 1A [Source:HGNC Symbol;Acc:29079]	1	Y	N	N
ENSG00000005339	Tier 2	CREBBP	16	3775055	3930727	-1	CREB binding protein [Source:HGNC Symbol;Acc:2348]	1	Y	N	N
ENSG00000006062	Tier 2	MAP3K14	17	43340488	43394414	-1	mitogen-activated protein kinase kinase kinase 14 [Source:HGNC Symbol;Acc:6853]	0	Y	N	N
ENSG00000006634	Tier 2	DBF4	7	87505531	87538856	1	DBF4 homolog (S. cerevisiae) [Source:HGNC Symbol;Acc:17364]	0	Y	N	N
ENSG00000006837	Tier 2	CDKL3	5	133541305	133706738	-1	cyclin-dependent kinase-like 3 [Source:HGNC Symbol;Acc:15483]	0	Y	N	N
ENSG00000007952	Tier 2	NOX1	X	100098313	100129334	-1	NADPH oxidase 1 [Source:HGNC Symbol;Acc:7889]	0	Y	N	N
ENSG00000008118	Tier 2	CAMK1G	1	209757062	209787283	1	calcium/calmodulin-dependent protein kinase IG [Source:HGNC Symbol;Acc:14585]	0	Y	N	N
ENSG00000008128	Tier 2	CDK11A	1	1634169	1655766	-1	cyclin-dependent kinase 11A [Source:HGNC Symbol;Acc:1730]	0	Y	N	N
ENSG00000008516	Tier 2	MMP25	16	3096682	3110727	1	matrix metallopeptidase 25 [Source:HGNC Symbol;Acc:14246]	0	Y	Y	N
ENSG00000010219	Tier 2	DYRK4	12	4671370	4723325	1	dual-specificity tyrosine-(Y)-phosphorylation regulated kinase 4 [Source:HGNC Symbol;Acc:3095]	0	Y	N	N
ENSG00000010379	Tier 2	SLC6A13	12	329789	372039	-1	solute carrier family 6 (neurotransmitter transporter), member 13 [Source:HGNC Symbol;Acc:11046]	4	Y	N	N
ENSG00000010438	Tier 2	PRSS3	9	33750515	33799230	1	protease, serine, 3 [Source:HGNC Symbol;Acc:9486]	0	Y	Y	N
ENSG00000011304	Tier 2	PTBP1	19	797075	812327	1	polypyrimidine tract binding protein 1 [Source:HGNC Symbol;Acc:9583]	0	Y	N	N
ENSG00000011405	Tier 2	PIK3C2A	11	17099277	17229530	-1	phosphatidylinositol-4-phosphate 3-kinase, catalytic subunit type 2 alpha [Source:HGNC Symbol;Acc:8971]	3	Y	N	N
ENSG00000011422	Tier 2	PLAUR	19	44150247	44174699	-1	plasminogen activator, urokinase receptor [Source:HGNC Symbol;Acc:9053]	0	Y	Y	N
ENSG00000011485	Tier 2	PPP5C	19	46850251	46896238	1	protein phosphatase 5, catalytic subunit [Source:HGNC Symbol;Acc:9322]	1	Y	N	N
ENSG00000012048	Tier 2	BRCA1	17	41196312	41277500	-1	breast cancer 1, early onset [Source:HGNC Symbol;Acc:1100]	0	Y	N	N
ENSG00000014216	Tier 2	CAPN1	11	64948037	64979477	1	calpain 1, (mu/I) large subunit [Source:HGNC Symbol;Acc:1476]	1	Y	N	N
ENSG00000014257	Tier 2	ACPP	3	132036211	132087142	1	acid phosphatase, prostate [Source:HGNC Symbol;Acc:125]	0	Y	Y	N
ENSG00000025434	Tier 2	NR1H3	11	47269851	47290396	1	nuclear receptor subfamily 1, group H, member 3 [Source:HGNC Symbol;Acc:7966]	11	Y	N	N
ENSG00000025708	Tier 2	TYMP	22	50964181	50968485	-1	thymidine phosphorylase [Source:HGNC Symbol;Acc:3148]	5	Y	N	N
ENSG00000027644	Tier 2	INSRR	1	156809855	156828810	-1	insulin receptor-related receptor [Source:HGNC Symbol;Acc:6093]	0	Y	Y	N
ENSG00000031544	Tier 2	NR2E3	15	72084977	72110600	1	nuclear receptor subfamily 2, group E, member 3 [Source:HGNC Symbol;Acc:7974]	1	Y	N	N
ENSG00000033178	Tier 2	UBA6	4	68478370	68566897	-1	ubiquitin-like modifier activating enzyme 6 [Source:HGNC Symbol;Acc:25581]	0	Y	N	N
ENSG00000036473	Tier 2	OTC	X	38211798	38280703	1	ornithine carbamoyltransferase [Source:HGNC Symbol;Acc:8512]	0	Y	N	N
ENSG00000036565	Tier 2	SLC18A1	8	20002366	20040717	-1	solute carrier family 18 (vesicular monoamine transporter), member 1 [Source:HGNC Symbol;Acc:10934]	0	Y	N	N
ENSG00000036672	Tier 2	USP2	11	119225925	119252436	-1	ubiquitin specific peptidase 2 [Source:HGNC Symbol;Acc:12618]	0	Y	N	N
ENSG00000041880	Tier 2	PARP3	3	51976361	51982883	1	poly (ADP-ribose) polymerase family, member 3 [Source:HGNC Symbol;Acc:273]	0	Y	N	N
ENSG00000044574	Tier 2	HSPA5	9	127997132	128003609	-1	heat shock 70kDa protein 5 (glucose-regulated protein, 78kDa) [Source:HGNC Symbol;Acc:5238]	0	Y	Y	N
ENSG00000049247	Tier 2	UTS2	1	7903143	7913572	-1	urotensin 2 [Source:HGNC Symbol;Acc:12636]	1	Y	Y	N
ENSG00000051180	Tier 2	RAD51	15	40986972	41024354	1	RAD51 recombinase [Source:HGNC Symbol;Acc:9817]	0	Y	N	N
ENSG00000055332	Tier 2	EIF2AK2	2	37326353	37384208	-1	eukaryotic translation initiation factor 2-alpha kinase 2 [Source:HGNC Symbol;Acc:9437]	0	Y	N	N
ENSG00000055732	Tier 2	MCOLN3	1	85483765	85514182	-1	mucolipin 3 [Source:HGNC Symbol;Acc:13358]	0	Y	N	N
ENSG00000056291	Tier 2	NPFFR2	4	72897521	73013784	1	neuropeptide FF receptor 2 [Source:HGNC Symbol;Acc:4525]	0	Y	Y	N
ENSG00000057252	Tier 2	SOAT1	1	179262925	179327815	1	sterol O-acyltransferase 1 [Source:HGNC Symbol;Acc:11177]	0	Y	N	N
ENSG00000058091	Tier 2	CDK14	7	90095738	90839905	1	cyclin-dependent kinase 14 [Source:HGNC Symbol;Acc:8883]	0	Y	N	N
ENSG00000059758	Tier 2	CDK17	12	96672039	96794338	-1	cyclin-dependent kinase 17 [Source:HGNC Symbol;Acc:8750]	0	Y	N	N
ENSG00000060982	Tier 2	BCAT1	12	24964295	25102393	-1	branched chain amino-acid transaminase 1, cytosolic [Source:HGNC Symbol;Acc:976]	0	Y	N	N
ENSG00000064601	Tier 2	CTSA	20	44518783	44527459	1	cathepsin A [Source:HGNC Symbol;Acc:9251]	0	Y	Y	N
ENSG00000064651	Tier 2	SLC12A2	5	127419458	127525380	1	solute carrier family 12 (sodium/potassium/chloride transporter), member 2 [Source:HGNC Symbol;Acc:10911]	0	Y	N	N
ENSG00000064687	Tier 2	ABCA7	19	1040102	1065571	1	ATP-binding cassette, sub-family A (ABC1), member 7 [Source:HGNC Symbol;Acc:37]	3	Y	Y	N
ENSG00000065427	Tier 2	KARS	16	75661622	75682541	-1	lysyl-tRNA synthetase [Source:HGNC Symbol;Acc:6215]	0	Y	Y	N
ENSG00000065833	Tier 2	ME1	6	83920108	84140797	-1	malic enzyme 1, NADP(+)-dependent, cytosolic [Source:HGNC Symbol;Acc:6983]	0	Y	N	N
ENSG00000066044	Tier 2	ELAVL1	19	8023463	8070543	-1	ELAV like RNA binding protein 1 [Source:HGNC Symbol;Acc:3312]	0	Y	N	N
ENSG00000066135	Tier 2	KDM4A	1	44115829	44171186	1	lysine (K)-specific demethylase 4A [Source:HGNC Symbol;Acc:22978]	2	Y	N	N
ENSG00000068903	Tier 2	SIRT2	19	39369197	39390502	-1	sirtuin 2 [Source:HGNC Symbol;Acc:10886]	0	Y	N	N
ENSG00000068976	Tier 2	PYGM	11	64513861	64527769	-1	phosphorylase, glycogen, muscle [Source:HGNC Symbol;Acc:9726]	1	Y	N	N
ENSG00000069956	Tier 2	MAPK6	15	52244303	52358462	1	mitogen-activated protein kinase 6 [Source:HGNC Symbol;Acc:6879]	0	Y	N	N
ENSG00000070501	Tier 2	POLB	8	42195972	42229326	1	polymerase (DNA directed), beta [Source:HGNC Symbol;Acc:9174]	2	Y	N	N
ENSG00000070610	Tier 2	GBA2	9	35736863	35749983	-1	glucosidase, beta (bile acid) 2 [Source:HGNC Symbol;Acc:18986]	0	Y	N	N
ENSG00000070759	Tier 2	TESK2	1	45809555	45956872	-1	testis-specific kinase 2 [Source:HGNC Symbol;Acc:11732]	2	Y	N	N
ENSG00000070770	Tier 2	CSNK2A2	16	58191811	58231824	-1	casein kinase 2, alpha prime polypeptide [Source:HGNC Symbol;Acc:2459]	0	Y	N	N
ENSG00000070831	Tier 2	CDC42	1	22379120	22419437	1	cell division cycle 42 [Source:HGNC Symbol;Acc:1736]	8	Y	N	N
ENSG00000071909	Tier 2	MYO3B	2	171034655	171511681	1	myosin IIIB [Source:HGNC Symbol;Acc:15576]	0	Y	N	N
ENSG00000073009	Tier 2	IKBKG	X	153769414	153796782	1	inhibitor of kappa light polypeptide gene enhancer in B-cells, kinase gamma [Source:HGNC Symbol;Acc:5961]	9	Y	N	N
ENSG00000073060	Tier 2	SCARB1	12	125261402	125367214	-1	scavenger receptor class B, member 1 [Source:HGNC Symbol;Acc:1664]	6	Y	N	N
ENSG00000074047	Tier 2	GLI2	2	121493199	121750229	1	GLI family zinc finger 2 [Source:HGNC Symbol;Acc:4318]	0	Y	N	N
ENSG00000074416	Tier 2	MGLL	3	127407909	127542051	-1	monoglyceride lipase [Source:HGNC Symbol;Acc:17038]	1	Y	N	N
ENSG00000074603	Tier 2	DPP8	15	65734801	65810042	-1	dipeptidyl-peptidase 8 [Source:HGNC Symbol;Acc:16490]	2	Y	N	N
ENSG00000075673	Tier 2	ATP12A	13	25254549	25285921	1	ATPase, H+/K+ transporting, nongastric, alpha polypeptide [Source:HGNC Symbol;Acc:13816]	0	Y	N	N
ENSG00000076555	Tier 2	ACACB	12	109554400	109706031	1	acetyl-CoA carboxylase beta [Source:HGNC Symbol;Acc:85]	0	Y	N	N
ENSG00000077616	Tier 2	NAALAD2	11	89864683	89926062	1	N-acetylated alpha-linked acidic dipeptidase 2 [Source:HGNC Symbol;Acc:14526]	1	Y	N	N
ENSG00000078061	Tier 2	ARAF	X	47420516	47431307	1	v-raf murine sarcoma 3611 viral oncogene homolog [Source:HGNC Symbol;Acc:646]	0	Y	N	N
ENSG00000078142	Tier 2	PIK3C3	18	39535171	39667794	1	phosphatidylinositol 3-kinase, catalytic subunit type 3 [Source:HGNC Symbol;Acc:8974]	0	Y	N	N
ENSG00000078549	Tier 2	ADCYAP1R1	7	31092076	31151089	1	adenylate cyclase activating polypeptide 1 (pituitary) receptor type I [Source:HGNC Symbol;Acc:242]	0	Y	Y	N
ENSG00000079215	Tier 2	SLC1A3	5	36606457	36688436	1	solute carrier family 1 (glial high affinity glutamate transporter), member 3 [Source:HGNC Symbol;Acc:10941]	0	Y	N	N
ENSG00000079435	Tier 2	LIPE	19	42905659	42931578	-1	lipase, hormone-sensitive [Source:HGNC Symbol;Acc:6621]	0	Y	N	N
ENSG00000080618	Tier 2	CPB2	13	46627321	46679211	-1	carboxypeptidase B2 (plasma) [Source:HGNC Symbol;Acc:2300]	0	Y	Y	N
ENSG00000080709	Tier 2	KCNN2	5	113696642	113832337	1	potassium intermediate/small conductance calcium-activated channel, subfamily N, member 2 [Source:HGNC Symbol;Acc:6291]	1	Y	N	N
ENSG00000084072	Tier 2	PPIE	1	40157854	40229586	1	peptidylprolyl isomerase E (cyclophilin E) [Source:HGNC Symbol;Acc:9258]	0	N	Y	N
ENSG00000084774	Tier 2	CAD	2	27440258	27466811	1	carbamoyl-phosphate synthetase 2, aspartate transcarbamylase, and dihydroorotase [Source:HGNC Symbol;Acc:1424]	1	Y	N	N
ENSG00000085377	Tier 2	PREP	6	105725440	105850959	-1	prolyl endopeptidase [Source:HGNC Symbol;Acc:9358]	0	Y	N	N
ENSG00000086061	Tier 2	DNAJA1	9	33025209	33039905	1	DnaJ (Hsp40) homolog, subfamily A, member 1 [Source:HGNC Symbol;Acc:5229]	0	Y	N	N
ENSG00000086232	Tier 2	EIF2AK1	7	6061881	6098861	-1	eukaryotic translation initiation factor 2-alpha kinase 1 [Source:HGNC Symbol;Acc:24921]	0	Y	N	N
ENSG00000086696	Tier 2	HSD17B2	16	82068609	82132139	1	hydroxysteroid (17-beta) dehydrogenase 2 [Source:HGNC Symbol;Acc:5211]	0	Y	N	N
ENSG00000086991	Tier 2	NOX4	11	89057524	89322779	-1	NADPH oxidase 4 [Source:HGNC Symbol;Acc:7891]	11	Y	N	N
ENSG00000087095	Tier 2	NLK	17	26368763	26523407	1	nemo-like kinase [Source:HGNC Symbol;Acc:29858]	0	Y	N	N
ENSG00000088305	Tier 2	DNMT3B	20	31350191	31397162	1	DNA (cytosine-5-)-methyltransferase 3 beta [Source:HGNC Symbol;Acc:2979]	1	Y	N	N
ENSG00000088926	Tier 2	F11	4	187187099	187210835	1	coagulation factor XI [Source:HGNC Symbol;Acc:3529]	4	Y	Y	N
ENSG00000089022	Tier 2	MAPKAPK5	12	112279782	112334343	1	mitogen-activated protein kinase-activated protein kinase 5 [Source:HGNC Symbol;Acc:6889]	74	Y	N	N
ENSG00000089041	Tier 2	P2RX7	12	121570622	121623876	1	purinergic receptor P2X, ligand-gated ion channel, 7 [Source:HGNC Symbol;Acc:8537]	0	Y	N	N
ENSG00000089050	Tier 2	RBBP9	20	18467184	18477887	-1	retinoblastoma binding protein 9 [Source:HGNC Symbol;Acc:9892]	0	Y	N	N
ENSG00000089685	Tier 2	BIRC5	17	76210267	76221717	1	baculoviral IAP repeat containing 5 [Source:HGNC Symbol;Acc:593]	0	Y	N	N
ENSG00000091428	Tier 2	RAPGEF4	2	173600002	173917621	1	Rap guanine nucleotide exchange factor (GEF) 4 [Source:HGNC Symbol;Acc:16626]	0	Y	N	N
ENSG00000091704	Tier 2	CPA1	7	130020180	130027955	1	carboxypeptidase A1 (pancreatic) [Source:HGNC Symbol;Acc:2296]	0	Y	Y	N
ENSG00000092295	Tier 2	TGM1	14	24718320	24733638	-1	transglutaminase 1 [Source:HGNC Symbol;Acc:11777]	0	Y	N	N
ENSG00000092531	Tier 2	SNAP23	15	42783431	42837547	1	synaptosomal-associated protein, 23kDa [Source:HGNC Symbol;Acc:11131]	0	N	Y	N
ENSG00000095015	Tier 2	MAP3K1	5	56111401	56191979	1	mitogen-activated protein kinase kinase kinase 1, E3 ubiquitin protein ligase [Source:HGNC Symbol;Acc:6848]	14	Y	N	N
ENSG00000095777	Tier 2	MYO3A	10	26223196	26501456	1	myosin IIIA [Source:HGNC Symbol;Acc:7601]	0	Y	N	N
ENSG00000097046	Tier 2	CDC7	1	91966408	91991321	1	cell division cycle 7 [Source:HGNC Symbol;Acc:1745]	0	Y	N	N
ENSG00000099194	Tier 2	SCD	10	102106881	102124591	1	stearoyl-CoA desaturase (delta-9-desaturase) [Source:HGNC Symbol;Acc:10571]	0	Y	N	N
ENSG00000099810	Tier 2	MTAP	9	21802542	21931646	1	methylthioadenosine phosphorylase [Source:HGNC Symbol;Acc:7413]	2	Y	N	N
ENSG00000100219	Tier 2	XBP1	22	29190543	29196585	-1	X-box binding protein 1 [Source:HGNC Symbol;Acc:12801]	3	Y	N	N
ENSG00000100300	Tier 2	TSPO	22	43547520	43559248	1	translocator protein (18kDa) [Source:HGNC Symbol;Acc:1158]	0	Y	N	N
ENSG00000100312	Tier 2	ACR	22	51176624	51183762	1	acrosin [Source:HGNC Symbol;Acc:126]	0	Y	Y	N
ENSG00000100324	Tier 2	TAB1	22	39795746	39833065	1	TGF-beta activated kinase 1/MAP3K7 binding protein 1 [Source:HGNC Symbol;Acc:18157]	20	Y	N	N
ENSG00000100393	Tier 2	EP300	22	41487790	41576081	1	E1A binding protein p300 [Source:HGNC Symbol;Acc:3373]	1	Y	N	N
ENSG00000100448	Tier 2	CTSG	14	25042728	25045466	-1	cathepsin G [Source:HGNC Symbol;Acc:2532]	0	Y	Y	N
ENSG00000100453	Tier 2	GZMB	14	25100160	25103473	-1	granzyme B (granzyme 2, cytotoxic T-lymphocyte-associated serine esterase 1) [Source:HGNC Symbol;Acc:4709]	1	Y	Y	N
ENSG00000100490	Tier 2	CDKL1	14	50796310	50883179	-1	cyclin-dependent kinase-like 1 (CDC2-related kinase) [Source:HGNC Symbol;Acc:1781]	0	Y	N	N
ENSG00000100504	Tier 2	PYGL	14	51324609	51411454	-1	phosphorylase, glycogen, liver [Source:HGNC Symbol;Acc:9725]	1	Y	N	N
ENSG00000100906	Tier 2	NFKBIA	14	35870717	35873955	-1	nuclear factor of kappa light polypeptide gene enhancer in B-cells inhibitor, alpha [Source:HGNC Symbol;Acc:7797]	0	Y	N	N
ENSG00000101049	Tier 2	SGK2	20	42187608	42216877	1	serum/glucocorticoid regulated kinase 2 [Source:HGNC Symbol;Acc:13900]	0	Y	N	N
ENSG00000101160	Tier 2	CTSZ	20	57570240	57582302	-1	cathepsin Z [Source:HGNC Symbol;Acc:2547]	1	Y	Y	N
ENSG00000101224	Tier 2	CDC25B	20	3767578	3786762	1	cell division cycle 25B [Source:HGNC Symbol;Acc:1726]	0	Y	N	N
ENSG00000101323	Tier 2	HAO1	20	7863628	7921121	-1	hydroxyacid oxidase (glycolate oxidase) 1 [Source:HGNC Symbol;Acc:4809]	1	Y	N	N
ENSG00000101444	Tier 2	AHCY	20	32868074	32899608	-1	adenosylhomocysteinase [Source:HGNC Symbol;Acc:343]	1	Y	N	N
ENSG00000101670	Tier 2	LIPG	18	47087069	47119272	1	lipase, endothelial [Source:HGNC Symbol;Acc:6623]	0	Y	Y	N
ENSG00000101916	Tier 2	TLR8	X	12924739	12941288	1	toll-like receptor 8 [Source:HGNC Symbol;Acc:15632]	0	Y	Y	N
ENSG00000101945	Tier 2	SUV39H1	X	48553945	48567403	1	suppressor of variegation 3-9 homolog 1 (Drosophila) [Source:HGNC Symbol;Acc:11479]	0	Y	N	N
ENSG00000101958	Tier 2	GLRA2	X	14547420	14749934	1	glycine receptor, alpha 2 [Source:HGNC Symbol;Acc:4327]	0	Y	Y	N
ENSG00000101981	Tier 2	F9	X	138612917	138645617	1	coagulation factor IX [Source:HGNC Symbol;Acc:3551]	0	Y	Y	N
ENSG00000102172	Tier 2	SMS	X	21958691	22025798	1	spermine synthase [Source:HGNC Symbol;Acc:11123]	0	Y	N	N
ENSG00000102195	Tier 2	GPR50	X	150345125	150349937	1	G protein-coupled receptor 50 [Source:HGNC Symbol;Acc:4506]	0	Y	Y	N
ENSG00000102239	Tier 2	BRS3	X	135570046	135575939	1	bombesin-like receptor 3 [Source:HGNC Symbol;Acc:1113]	0	Y	Y	N
ENSG00000102554	Tier 2	KLF5	13	73629114	73651676	1	Kruppel-like factor 5 (intestinal) [Source:HGNC Symbol;Acc:6349]	0	Y	N	N
ENSG00000102699	Tier 2	PARP4	13	24995064	25086948	-1	poly (ADP-ribose) polymerase family, member 4 [Source:HGNC Symbol;Acc:271]	0	Y	N	N
ENSG00000103150	Tier 2	MLYCD	16	83932731	83949787	1	malonyl-CoA decarboxylase [Source:HGNC Symbol;Acc:7150]	0	Y	N	N
ENSG00000103319	Tier 2	EEF2K	16	22217603	22298554	1	eukaryotic elongation factor-2 kinase [Source:HGNC Symbol;Acc:24615]	0	Y	N	N
ENSG00000103811	Tier 2	CTSH	15	79213400	79241916	-1	cathepsin H [Source:HGNC Symbol;Acc:2535]	1	Y	Y	N
ENSG00000104332	Tier 2	SFRP1	8	41119481	41167016	-1	secreted frizzled-related protein 1 [Source:HGNC Symbol;Acc:10776]	0	Y	Y	N
ENSG00000104885	Tier 2	DOT1L	19	2164148	2232577	1	DOT1-like histone H3K79 methyltransferase [Source:HGNC Symbol;Acc:24948]	5	Y	N	N
ENSG00000105143	Tier 2	SLC1A6	19	15060846	15133802	-1	solute carrier family 1 (high affinity aspartate/glutamate transporter), member 6 [Source:HGNC Symbol;Acc:10944]	0	Y	N	N
ENSG00000105426	Tier 2	PTPRS	19	5158506	5340814	-1	protein tyrosine phosphatase, receptor type, S [Source:HGNC Symbol;Acc:9681]	0	Y	N	N
ENSG00000105486	Tier 2	LIG1	19	48618702	48673860	-1	ligase I, DNA, ATP-dependent [Source:HGNC Symbol;Acc:6598]	0	Y	N	N
ENSG00000105492	Tier 2	SIGLEC6	19	52022779	52035110	-1	sialic acid binding Ig-like lectin 6 [Source:HGNC Symbol;Acc:10875]	0	N	Y	N
ENSG00000105501	Tier 2	SIGLEC5	19	52114781	52150151	-1	sialic acid binding Ig-like lectin 5 [Source:HGNC Symbol;Acc:10874]	1	N	Y	N
ENSG00000105642	Tier 2	KCNN1	19	18062102	18110889	1	potassium intermediate/small conductance calcium-activated channel, subfamily N, member 1 [Source:HGNC Symbol;Acc:6290]	0	Y	N	N
ENSG00000105835	Tier 2	NAMPT	7	105888731	105926772	-1	nicotinamide phosphoribosyltransferase [Source:HGNC Symbol;Acc:30092]	0	Y	N	N
ENSG00000106018	Tier 2	VIPR2	7	158820866	158937649	-1	vasoactive intestinal peptide receptor 2 [Source:HGNC Symbol;Acc:12695]	1	N	Y	N
ENSG00000106100	Tier 2	NOD1	7	30464143	30518400	-1	nucleotide-binding oligomerization domain containing 1 [Source:HGNC Symbol;Acc:16390]	0	Y	N	N
ENSG00000106144	Tier 2	CASP2	7	142985308	143004789	1	caspase 2, apoptosis-related cysteine peptidase [Source:HGNC Symbol;Acc:1503]	0	Y	N	N
ENSG00000106366	Tier 2	SERPINE1	7	100770370	100782547	1	serpin peptidase inhibitor, clade E (nexin, plasminogen activator inhibitor type 1), member 1 [Source:HGNC Symbol;Acc:8583]	0	Y	Y	N
ENSG00000106633	Tier 2	GCK	7	44183872	44237769	-1	glucokinase (hexokinase 4) [Source:HGNC Symbol;Acc:4195]	13	Y	N	N
ENSG00000106682	Tier 2	EIF4H	7	73588575	73611431	1	eukaryotic translation initiation factor 4H [Source:HGNC Symbol;Acc:12741]	0	Y	N	N
ENSG00000106683	Tier 2	LIMK1	7	73497263	73536855	1	LIM domain kinase 1 [Source:HGNC Symbol;Acc:6613]	0	Y	N	N
ENSG00000107077	Tier 2	KDM4C	9	6720863	7175648	1	lysine (K)-specific demethylase 4C [Source:HGNC Symbol;Acc:17071]	2	Y	N	N
ENSG00000107593	Tier 2	PKD2L1	10	102047903	102090243	-1	polycystic kidney disease 2-like 1 [Source:HGNC Symbol;Acc:9011]	9	Y	N	N
ENSG00000107779	Tier 2	BMPR1A	10	88516407	88692595	1	bone morphogenetic protein receptor, type IA [Source:HGNC Symbol;Acc:1076]	0	Y	Y	N
ENSG00000107798	Tier 2	LIPA	10	90973326	91174314	-1	lipase A, lysosomal acid, cholesterol esterase [Source:HGNC Symbol;Acc:6617]	2	Y	N	N
ENSG00000107968	Tier 2	MAP3K8	10	30722866	30750762	1	mitogen-activated protein kinase kinase kinase 8 [Source:HGNC Symbol;Acc:6860]	1	Y	N	N
ENSG00000108179	Tier 2	PPIF	10	81107225	81115093	1	peptidylprolyl isomerase F [Source:HGNC Symbol;Acc:9259]	1	N	Y	N
ENSG00000108379	Tier 2	WNT3	17	44839872	44910520	-1	wingless-type MMTV integration site family, member 3 [Source:HGNC Symbol;Acc:12782]	13	Y	Y	N
ENSG00000108479	Tier 2	GALK1	17	73747675	73761792	-1	galactokinase 1 [Source:HGNC Symbol;Acc:4118]	0	Y	N	N
ENSG00000108788	Tier 2	MLX	17	40719086	40725257	1	MLX, MAX dimerization protein [Source:HGNC Symbol;Acc:11645]	1	Y	N	N
ENSG00000108839	Tier 2	ALOX12	17	6899384	6914055	1	arachidonate 12-lipoxygenase [Source:HGNC Symbol;Acc:429]	3	Y	N	N
ENSG00000108861	Tier 2	DUSP3	17	41843489	41856356	-1	dual specificity phosphatase 3 [Source:HGNC Symbol;Acc:3069]	2	Y	N	N
ENSG00000109321	Tier 2	AREG	4	75310851	75320726	1	amphiregulin [Source:HGNC Symbol;Acc:651]	0	Y	Y	N
ENSG00000109323	Tier 2	MANBA	4	103552660	103682151	-1	mannosidase, beta A, lysosomal [Source:HGNC Symbol;Acc:6831]	1	Y	N	N
ENSG00000109576	Tier 2	AADAT	4	170981373	171012850	-1	aminoadipate aminotransferase [Source:HGNC Symbol;Acc:17929]	1	Y	N	N
ENSG00000109861	Tier 2	CTSC	11	88026760	88070955	-1	cathepsin C [Source:HGNC Symbol;Acc:2528]	0	Y	Y	N
ENSG00000109991	Tier 2	P2RX3	11	57105848	57138073	1	purinergic receptor P2X, ligand-gated ion channel, 3 [Source:HGNC Symbol;Acc:8534]	0	Y	N	N
ENSG00000110090	Tier 2	CPT1A	11	68522088	68611878	-1	carnitine palmitoyltransferase 1A (liver) [Source:HGNC Symbol;Acc:2328]	1	Y	N	N
ENSG00000110436	Tier 2	SLC1A2	11	35272753	35441610	-1	solute carrier family 1 (glial high affinity glutamate transporter), member 2 [Source:HGNC Symbol;Acc:10940]	1	Y	N	N
ENSG00000110881	Tier 2	ASIC1	12	50451331	50477394	1	acid-sensing (proton-gated) ion channel 1 [Source:HGNC Symbol;Acc:100]	1	Y	Y	N
ENSG00000110887	Tier 2	DAO	12	109252708	109294819	1	D-amino-acid oxidase [Source:HGNC Symbol;Acc:2671]	0	Y	N	N
ENSG00000110911	Tier 2	SLC11A2	12	51373184	51422349	-1	solute carrier family 11 (proton-coupled divalent metal ion transporter), member 2 [Source:HGNC Symbol;Acc:10908]	0	Y	N	N
ENSG00000111199	Tier 2	TRPV4	12	110220890	110271212	-1	transient receptor potential cation channel, subfamily V, member 4 [Source:HGNC Symbol;Acc:18083]	0	Y	N	N
ENSG00000111640	Tier 2	GAPDH	12	6643093	6647537	1	glyceraldehyde-3-phosphate dehydrogenase [Source:HGNC Symbol;Acc:4141]	0	Y	N	N
ENSG00000111716	Tier 2	LDHB	12	21788276	21910791	-1	lactate dehydrogenase B [Source:HGNC Symbol;Acc:6541]	0	Y	N	N
ENSG00000111725	Tier 2	PRKAB1	12	120105558	120119435	1	protein kinase, AMP-activated, beta 1 non-catalytic subunit [Source:HGNC Symbol;Acc:9378]	1	Y	N	N
ENSG00000111886	Tier 2	GABRR2	6	89966927	90025018	-1	gamma-aminobutyric acid (GABA) A receptor, rho 2 [Source:HGNC Symbol;Acc:4091]	0	Y	Y	N
ENSG00000112079	Tier 2	STK38	6	36461669	36515247	-1	serine/threonine kinase 38 [Source:HGNC Symbol;Acc:17847]	0	Y	N	N
ENSG00000112245	Tier 2	PTP4A1	6	64231666	64293492	1	protein tyrosine phosphatase type IVA, member 1 [Source:HGNC Symbol;Acc:9634]	0	Y	N	N
ENSG00000112486	Tier 2	CCR6	6	167525295	167553184	1	chemokine (C-C motif) receptor 6 [Source:HGNC Symbol;Acc:1607]	11	Y	Y	N
ENSG00000112701	Tier 2	SENP6	6	76311225	76427997	1	SUMO1/sentrin specific peptidase 6 [Source:HGNC Symbol;Acc:20944]	2	Y	N	N
ENSG00000113262	Tier 2	GRM6	5	178405328	178423207	-1	glutamate receptor, metabotropic 6 [Source:HGNC Symbol;Acc:4598]	0	Y	N	N
ENSG00000113407	Tier 2	TARS	5	33440802	33469644	1	threonyl-tRNA synthetase [Source:HGNC Symbol;Acc:11572]	0	Y	N	N
ENSG00000113441	Tier 2	LNPEP	5	96271098	96373219	1	leucyl/cystinyl aminopeptidase [Source:HGNC Symbol;Acc:6656]	3	Y	Y	N
ENSG00000114166	Tier 2	KAT2B	3	20081515	20195896	1	K(lysine) acetyltransferase 2B [Source:HGNC Symbol;Acc:8638]	0	Y	N	N
ENSG00000114491	Tier 2	UMPS	3	124449213	124464040	1	uridine monophosphate synthetase [Source:HGNC Symbol;Acc:12563]	0	Y	N	N
ENSG00000114670	Tier 2	NEK11	3	130745694	131069309	1	NIMA-related kinase 11 [Source:HGNC Symbol;Acc:18593]	0	Y	N	N
ENSG00000114738	Tier 2	MAPKAPK3	3	50648951	50686720	1	mitogen-activated protein kinase-activated protein kinase 3 [Source:HGNC Symbol;Acc:6888]	1	Y	N	N
ENSG00000114739	Tier 2	ACVR2B	3	38495342	38534633	1	activin A receptor, type IIB [Source:HGNC Symbol;Acc:174]	0	Y	N	N
ENSG00000114812	Tier 2	VIPR1	3	42530791	42579059	1	vasoactive intestinal peptide receptor 1 [Source:HGNC Symbol;Acc:12694]	0	N	Y	N
ENSG00000114854	Tier 2	TNNC1	3	52485118	52488086	-1	troponin C type 1 (slow) [Source:HGNC Symbol;Acc:11943]	10	Y	N	N
ENSG00000114857	Tier 2	NKTR	3	42642106	42690227	1	natural killer-tumor recognition sequence [Source:HGNC Symbol;Acc:7833]	0	N	Y	N
ENSG00000114904	Tier 2	NEK4	3	52744800	52804965	-1	NIMA-related kinase 4 [Source:HGNC Symbol;Acc:11399]	10	Y	N	N
ENSG00000114999	Tier 2	TTL	2	113239731	113299316	1	tubulin tyrosine ligase [Source:HGNC Symbol;Acc:21586]	0	Y	N	N
ENSG00000115233	Tier 2	PSMD14	2	162164549	162268228	1	proteasome (prosome, macropain) 26S subunit, non-ATPase, 14 [Source:HGNC Symbol;Acc:16889]	0	Y	N	N
ENSG00000115252	Tier 2	PDE1A	2	183004763	183387919	-1	phosphodiesterase 1A, calmodulin-dependent [Source:HGNC Symbol;Acc:8774]	0	Y	N	N
ENSG00000115415	Tier 2	STAT1	2	191829084	191885686	-1	signal transducer and activator of transcription 1, 91kDa [Source:HGNC Symbol;Acc:11362]	0	Y	N	N
ENSG00000115457	Tier 2	IGFBP2	2	217497551	217529159	1	insulin-like growth factor binding protein 2, 36kDa [Source:HGNC Symbol;Acc:5471]	1	Y	Y	N
ENSG00000115461	Tier 2	IGFBP5	2	217536828	217560248	-1	insulin-like growth factor binding protein 5 [Source:HGNC Symbol;Acc:5474]	0	Y	Y	N
ENSG00000115665	Tier 2	SLC5A7	2	108602979	108630450	1	solute carrier family 5 (sodium/choline cotransporter), member 7 [Source:HGNC Symbol;Acc:14025]	0	Y	N	N
ENSG00000115687	Tier 2	PASK	2	242045514	242089679	-1	PAS domain containing serine/threonine kinase [Source:HGNC Symbol;Acc:17270]	0	Y	N	N
ENSG00000115828	Tier 2	QPCT	2	37571717	37600465	1	glutaminyl-peptide cyclotransferase [Source:HGNC Symbol;Acc:9753]	1	Y	Y	N
ENSG00000115919	Tier 2	KYNU	2	143635067	143799890	1	kynureninase [Source:HGNC Symbol;Acc:6469]	0	Y	N	N
ENSG00000116014	Tier 2	KISS1R	19	917287	921015	1	KISS1 receptor [Source:HGNC Symbol;Acc:4510]	0	Y	Y	N
ENSG00000116016	Tier 2	EPAS1	2	46520806	46613836	1	endothelial PAS domain protein 1 [Source:HGNC Symbol;Acc:3374]	1	Y	N	N
ENSG00000116039	Tier 2	ATP6V1B1	2	71163012	71192536	1	ATPase, H+ transporting, lysosomal 56/58kDa, V1 subunit B1 [Source:HGNC Symbol;Acc:853]	0	Y	N	N
ENSG00000116171	Tier 2	SCP2	1	53392901	53517375	1	sterol carrier protein 2 [Source:HGNC Symbol;Acc:10606]	0	Y	N	N
ENSG00000116237	Tier 2	ICMT	1	6281253	6296032	-1	isoprenylcysteine carboxyl methyltransferase [Source:HGNC Symbol;Acc:5350]	3	Y	N	N
ENSG00000116337	Tier 2	AMPD2	1	110158726	110174673	1	adenosine monophosphate deaminase 2 [Source:HGNC Symbol;Acc:469]	1	Y	N	N
ENSG00000116649	Tier 2	SRM	1	11114641	11120081	-1	spermidine synthase [Source:HGNC Symbol;Acc:11296]	0	Y	N	N
ENSG00000116748	Tier 2	AMPD1	1	115215719	115238239	-1	adenosine monophosphate deaminase 1 [Source:HGNC Symbol;Acc:468]	9	Y	N	N
ENSG00000116882	Tier 2	HAO2	1	119911402	119936753	1	hydroxyacid oxidase 2 (long chain) [Source:HGNC Symbol;Acc:4810]	1	Y	N	N
ENSG00000117009	Tier 2	KMO	1	241695434	241758944	1	kynurenine 3-monooxygenase (kynurenine 3-hydroxylase) [Source:HGNC Symbol;Acc:6381]	0	Y	N	N
ENSG00000117152	Tier 2	RGS4	1	163038565	163046592	1	regulator of G-protein signaling 4 [Source:HGNC Symbol;Acc:10000]	0	Y	N	N
ENSG00000117266	Tier 2	CDK18	1	205473723	205501921	1	cyclin-dependent kinase 18 [Source:HGNC Symbol;Acc:8751]	0	Y	N	N
ENSG00000117298	Tier 2	ECE1	1	21543740	21671997	-1	endothelin converting enzyme 1 [Source:HGNC Symbol;Acc:3146]	0	Y	Y	N
ENSG00000117308	Tier 2	GALE	1	24122089	24127271	-1	UDP-galactose-4-epimerase [Source:HGNC Symbol;Acc:4116]	0	Y	N	N
ENSG00000117394	Tier 2	SLC2A1	1	43391052	43424530	-1	solute carrier family 2 (facilitated glucose transporter), member 1 [Source:HGNC Symbol;Acc:11005]	0	Y	N	N
ENSG00000117834	Tier 2	SLC5A9	1	48688357	48714316	1	solute carrier family 5 (sodium/sugar cotransporter), member 9 [Source:HGNC Symbol;Acc:22146]	0	Y	N	N
ENSG00000118194	Tier 2	TNNT2	1	201328136	201346890	-1	troponin T type 2 (cardiac) [Source:HGNC Symbol;Acc:11949]	0	Y	N	N
ENSG00000118515	Tier 2	SGK1	6	134490384	134639250	-1	serum/glucocorticoid regulated kinase 1 [Source:HGNC Symbol;Acc:10810]	1	Y	N	N
ENSG00000118762	Tier 2	PKD2	4	88928820	88998929	1	polycystic kidney disease 2 (autosomal dominant) [Source:HGNC Symbol;Acc:9009]	11	Y	N	N
ENSG00000118939	Tier 2	UCHL3	13	76123619	76180085	1	ubiquitin carboxyl-terminal esterase L3 (ubiquitin thiolesterase) [Source:HGNC Symbol;Acc:12515]	0	Y	N	N
ENSG00000119121	Tier 2	TRPM6	9	77337411	77503010	-1	transient receptor potential cation channel, subfamily M, member 6 [Source:HGNC Symbol;Acc:17995]	1	Y	N	N
ENSG00000119408	Tier 2	NEK6	9	127019885	127115586	1	NIMA-related kinase 6 [Source:HGNC Symbol;Acc:7749]	0	Y	N	N
ENSG00000119638	Tier 2	NEK9	14	75548822	75594047	-1	NIMA-related kinase 9 [Source:HGNC Symbol;Acc:18591]	0	Y	N	N
ENSG00000119912	Tier 2	IDE	10	94211441	94333833	-1	insulin-degrading enzyme [Source:HGNC Symbol;Acc:5381]	10	Y	Y	N
ENSG00000119915	Tier 2	ELOVL3	10	103986085	103989346	1	ELOVL fatty acid elongase 3 [Source:HGNC Symbol;Acc:18047]	1	Y	N	N
ENSG00000120054	Tier 2	CPN1	10	101801950	101841634	-1	carboxypeptidase N, polypeptide 1 [Source:HGNC Symbol;Acc:2312]	4	Y	Y	N
ENSG00000120868	Tier 2	APAF1	12	99038919	99129204	1	apoptotic peptidase activating factor 1 [Source:HGNC Symbol;Acc:576]	0	Y	N	N
ENSG00000121774	Tier 2	KHDRBS1	1	32479430	32526451	1	KH domain containing, RNA binding, signal transduction associated 1 [Source:HGNC Symbol;Acc:18116]	0	Y	N	N
ENSG00000121858	Tier 2	TNFSF10	3	172223298	172241297	-1	tumor necrosis factor (ligand) superfamily, member 10 [Source:HGNC Symbol;Acc:11925]	0	Y	Y	N
ENSG00000121989	Tier 2	ACVR2A	2	148602086	148688393	1	activin A receptor, type IIA [Source:HGNC Symbol;Acc:173]	1	Y	N	N
ENSG00000122012	Tier 2	SV2C	5	75378997	75649764	1	synaptic vesicle glycoprotein 2C [Source:HGNC Symbol;Acc:30670]	0	Y	N	N
ENSG00000122121	Tier 2	XPNPEP2	X	128872950	128903514	1	X-prolyl aminopeptidase (aminopeptidase P) 2, membrane-bound [Source:HGNC Symbol;Acc:12823]	0	Y	N	N
ENSG00000122861	Tier 2	PLAU	10	75668935	75677255	1	plasminogen activator, urokinase [Source:HGNC Symbol;Acc:9052]	1	Y	Y	N
ENSG00000122873	Tier 2	CISD1	10	60028818	60049346	1	CDGSH iron sulfur domain 1 [Source:HGNC Symbol;Acc:30880]	2	Y	N	N
ENSG00000123268	Tier 2	ATF1	12	51157493	51214905	1	activating transcription factor 1 [Source:HGNC Symbol;Acc:783]	2	Y	N	N
ENSG00000123358	Tier 2	NR4A1	12	52416616	52453291	1	nuclear receptor subfamily 4, group A, member 1 [Source:HGNC Symbol;Acc:7980]	0	Y	N	N
ENSG00000123360	Tier 2	PDE1B	12	54943134	54973023	1	phosphodiesterase 1B, calmodulin-dependent [Source:HGNC Symbol;Acc:8775]	0	Y	N	N
ENSG00000123454	Tier 2	DBH	9	136501482	136524466	1	dopamine beta-hydroxylase (dopamine beta-monooxygenase) [Source:HGNC Symbol;Acc:2689]	0	Y	N	N
ENSG00000123700	Tier 2	KCNJ2	17	68164814	68176189	1	potassium inwardly-rectifying channel, subfamily J, member 2 [Source:HGNC Symbol;Acc:6263]	0	Y	Y	N
ENSG00000123815	Tier 2	ADCK4	19	41197434	41224112	-1	aarF domain containing kinase 4 [Source:HGNC Symbol;Acc:19041]	2	Y	N	N
ENSG00000123992	Tier 2	DNPEP	2	220238268	220264744	-1	aspartyl aminopeptidase [Source:HGNC Symbol;Acc:2981]	0	Y	N	N
ENSG00000124140	Tier 2	SLC12A5	20	44650356	44688784	1	solute carrier family 12 (potassium/chloride transporter), member 5 [Source:HGNC Symbol;Acc:13818]	7	Y	N	N
ENSG00000124151	Tier 2	NCOA3	20	46130601	46285621	1	nuclear receptor coactivator 3 [Source:HGNC Symbol;Acc:7670]	1	Y	N	N
ENSG00000124253	Tier 2	PCK1	20	56136136	56141513	1	phosphoenolpyruvate carboxykinase 1 (soluble) [Source:HGNC Symbol;Acc:8724]	0	Y	N	N
ENSG00000124299	Tier 2	PEPD	19	33877856	34012700	-1	peptidase D [Source:HGNC Symbol;Acc:8840]	6	Y	N	N
ENSG00000124491	Tier 2	F13A1	6	6144318	6321246	-1	coagulation factor XIII, A1 polypeptide [Source:HGNC Symbol;Acc:3531]	2	Y	Y	N
ENSG00000124493	Tier 2	GRM4	6	33989628	34123399	-1	glutamate receptor, metabotropic 4 [Source:HGNC Symbol;Acc:4596]	1	Y	N	N
ENSG00000124762	Tier 2	CDKN1A	6	36644305	36655116	1	cyclin-dependent kinase inhibitor 1A (p21, Cip1) [Source:HGNC Symbol;Acc:1784]	4	Y	N	N
ENSG00000124767	Tier 2	GLO1	6	38643701	38670917	-1	glyoxalase I [Source:HGNC Symbol;Acc:4323]	0	Y	N	N
ENSG00000125378	Tier 2	BMP4	14	54416454	54425479	-1	bone morphogenetic protein 4 [Source:HGNC Symbol;Acc:1071]	2	Y	Y	N
ENSG00000125780	Tier 2	TGM3	20	2276647	2321724	1	transglutaminase 3 [Source:HGNC Symbol;Acc:11779]	1	Y	N	N
ENSG00000126012	Tier 2	KDM5C	X	53220503	53254604	-1	lysine (K)-specific demethylase 5C [Source:HGNC Symbol;Acc:11114]	0	Y	N	N
ENSG00000126247	Tier 2	CAPNS1	19	36630477	36641255	1	calpain, small subunit 1 [Source:HGNC Symbol;Acc:1481]	0	Y	N	N
ENSG00000126261	Tier 2	UBA2	19	34919257	34960853	1	ubiquitin-like modifier activating enzyme 2 [Source:HGNC Symbol;Acc:30661]	0	Y	N	N
ENSG00000126262	Tier 2	FFAR2	19	35934809	35942669	1	free fatty acid receptor 2 [Source:HGNC Symbol;Acc:4501]	0	Y	N	N
ENSG00000126368	Tier 2	NR1D1	17	38249040	38256978	-1	nuclear receptor subfamily 1, group D, member 1 [Source:HGNC Symbol;Acc:7962]	0	Y	N	N
ENSG00000126561	Tier 2	STAT5A	17	40439565	40463961	1	signal transducer and activator of transcription 5A [Source:HGNC Symbol;Acc:11366]	4	Y	N	N
ENSG00000126602	Tier 2	TRAP1	16	3701640	3767598	-1	TNF receptor-associated protein 1 [Source:HGNC Symbol;Acc:16264]	0	Y	N	N
ENSG00000127329	Tier 2	PTPRB	12	70910630	71031220	-1	protein tyrosine phosphatase, receptor type, B [Source:HGNC Symbol;Acc:9665]	1	Y	N	N
ENSG00000127445	Tier 2	PIN1	19	9945933	9960358	1	peptidylprolyl cis/trans isomerase, NIMA-interacting 1 [Source:HGNC Symbol;Acc:8988]	1	Y	N	N
ENSG00000127472	Tier 2	PLA2G5	1	20354672	20417683	1	phospholipase A2, group V [Source:HGNC Symbol;Acc:9038]	0	Y	Y	N
ENSG00000127564	Tier 2	PKMYT1	16	3018025	3030540	-1	protein kinase, membrane associated tyrosine/threonine 1 [Source:HGNC Symbol;Acc:29650]	0	Y	N	N
ENSG00000127947	Tier 2	PTPN12	7	77166592	77269388	1	protein tyrosine phosphatase, non-receptor type 12 [Source:HGNC Symbol;Acc:9645]	1	Y	N	N
ENSG00000128285	Tier 2	MCHR1	22	41074754	41078818	1	melanin-concentrating hormone receptor 1 [Source:HGNC Symbol;Acc:4479]	0	Y	Y	N
ENSG00000128310	Tier 2	GALR3	22	38219389	38221502	1	galanin receptor 3 [Source:HGNC Symbol;Acc:4134]	0	Y	Y	N
ENSG00000128383	Tier 2	APOBEC3A	22	39348746	39359188	1	apolipoprotein B mRNA editing enzyme, catalytic polypeptide-like 3A [Source:HGNC Symbol;Acc:17343]	0	Y	N	N
ENSG00000128951	Tier 2	DUT	15	48623208	48635570	1	deoxyuridine triphosphatase [Source:HGNC Symbol;Acc:3078]	0	Y	N	N
ENSG00000129167	Tier 2	TPH1	11	18039111	18063973	-1	tryptophan hydroxylase 1 [Source:HGNC Symbol;Acc:12008]	0	Y	N	N
ENSG00000129219	Tier 2	PLD2	17	4710391	4726729	1	phospholipase D2 [Source:HGNC Symbol;Acc:9068]	0	Y	N	N
ENSG00000129450	Tier 2	SIGLEC9	19	51628165	51639908	1	sialic acid binding Ig-like lectin 9 [Source:HGNC Symbol;Acc:10878]	0	N	Y	N
ENSG00000129473	Tier 2	BCL2L2	14	23767999	23780968	1	BCL2-like 2 [Source:HGNC Symbol;Acc:995]	0	Y	N	N
ENSG00000129991	Tier 2	TNNI3	19	55663137	55669141	-1	troponin I type 3 (cardiac) [Source:HGNC Symbol;Acc:11947]	0	Y	N	N
ENSG00000130037	Tier 2	KCNA5	12	5153085	5155949	1	potassium voltage-gated channel, shaker-related subfamily, member 5 [Source:HGNC Symbol;Acc:6224]	0	Y	N	N
ENSG00000130164	Tier 2	LDLR	19	11200038	11244492	1	low density lipoprotein receptor [Source:HGNC Symbol;Acc:6547]	21	Y	Y	N
ENSG00000130234	Tier 2	ACE2	X	15579156	15620271	-1	angiotensin I converting enzyme 2 [Source:HGNC Symbol;Acc:13557]	0	Y	Y	N
ENSG00000130821	Tier 2	SLC6A8	X	152953554	152962048	1	solute carrier family 6 (neurotransmitter transporter), member 8 [Source:HGNC Symbol;Acc:11055]	0	Y	N	N
ENSG00000130948	Tier 2	HSD17B3	9	98997588	99064434	-1	hydroxysteroid (17-beta) dehydrogenase 3 [Source:HGNC Symbol;Acc:5212]	0	Y	N	N
ENSG00000131203	Tier 2	IDO1	8	39759794	39785963	1	indoleamine 2,3-dioxygenase 1 [Source:HGNC Symbol;Acc:6059]	1	Y	N	N
ENSG00000131408	Tier 2	NR1H2	19	50832910	50886239	1	nuclear receptor subfamily 1, group H, member 2 [Source:HGNC Symbol;Acc:7965]	0	Y	N	N
ENSG00000131473	Tier 2	ACLY	17	40023161	40086795	-1	ATP citrate lyase [Source:HGNC Symbol;Acc:115]	0	Y	N	N
ENSG00000131480	Tier 2	AOC2	17	40996617	41002724	1	amine oxidase, copper containing 2 (retina-specific) [Source:HGNC Symbol;Acc:549]	0	Y	N	N
ENSG00000131482	Tier 2	G6PC	17	41052814	41065386	1	glucose-6-phosphatase, catalytic subunit [Source:HGNC Symbol;Acc:4056]	0	Y	N	N
ENSG00000132142	Tier 2	ACACA	17	35441923	35766909	-1	acetyl-CoA carboxylase alpha [Source:HGNC Symbol;Acc:84]	0	Y	N	N
ENSG00000132164	Tier 2	SLC6A11	3	10857885	10982419	1	solute carrier family 6 (neurotransmitter transporter), member 11 [Source:HGNC Symbol;Acc:11044]	0	Y	N	N
ENSG00000132196	Tier 2	HSD17B7	1	162760492	162782607	1	hydroxysteroid (17-beta) dehydrogenase 7 [Source:HGNC Symbol;Acc:5215]	0	Y	N	N
ENSG00000132670	Tier 2	PTPRA	20	2844830	3019722	1	protein tyrosine phosphatase, receptor type, A [Source:HGNC Symbol;Acc:9664]	0	Y	N	N
ENSG00000132840	Tier 2	BHMT2	5	78365540	78385289	1	betaine--homocysteine S-methyltransferase 2 [Source:HGNC Symbol;Acc:1048]	7	Y	N	N
ENSG00000132906	Tier 2	CASP9	1	15817327	15853029	-1	caspase 9, apoptosis-related cysteine peptidase [Source:HGNC Symbol;Acc:1511]	0	Y	N	N
ENSG00000132915	Tier 2	PDE6A	5	149237519	149324356	-1	phosphodiesterase 6A, cGMP-specific, rod, alpha [Source:HGNC Symbol;Acc:8785]	0	Y	N	N
ENSG00000133056	Tier 2	PIK3C2B	1	204391756	204463852	-1	phosphatidylinositol-4-phosphate 3-kinase, catalytic subunit type 2 beta [Source:HGNC Symbol;Acc:8972]	3	Y	N	N
ENSG00000133275	Tier 2	CSNK1G2	19	1941188	1981337	1	casein kinase 1, gamma 2 [Source:HGNC Symbol;Acc:2455]	0	Y	N	N
ENSG00000133706	Tier 2	LARS	5	145492601	145562223	-1	leucyl-tRNA synthetase [Source:HGNC Symbol;Acc:6512]	0	Y	N	N
ENSG00000133805	Tier 2	AMPD3	11	10329860	10529126	1	adenosine monophosphate deaminase 3 [Source:HGNC Symbol;Acc:470]	3	Y	N	N
ENSG00000134072	Tier 2	CAMK1	3	9799026	9811676	-1	calcium/calmodulin-dependent protein kinase I [Source:HGNC Symbol;Acc:1459]	0	Y	N	N
ENSG00000134216	Tier 2	CHIA	1	111833484	111863188	1	chitinase, acidic [Source:HGNC Symbol;Acc:17432]	0	Y	Y	N
ENSG00000134242	Tier 2	PTPN22	1	114356433	114414381	-1	protein tyrosine phosphatase, non-receptor type 22 (lymphoid) [Source:HGNC Symbol;Acc:9652]	20	Y	N	N
ENSG00000134333	Tier 2	LDHA	11	18415935	18429972	1	lactate dehydrogenase A [Source:HGNC Symbol;Acc:6535]	1	Y	N	N
ENSG00000134480	Tier 2	CCNH	5	86687311	86708836	-1	cyclin H [Source:HGNC Symbol;Acc:1594]	0	Y	N	N
ENSG00000134684	Tier 2	YARS	1	33240840	33283754	-1	tyrosyl-tRNA synthetase [Source:HGNC Symbol;Acc:12840]	0	Y	Y	N
ENSG00000134817	Tier 2	APLNR	11	57001051	57004709	-1	apelin receptor [Source:HGNC Symbol;Acc:339]	0	Y	Y	N
ENSG00000134899	Tier 2	ERCC5	13	103497194	103528345	1	excision repair cross-complementing rodent repair deficiency, complementation group 5 [Source:HGNC Symbol;Acc:3437]	0	Y	N	N
ENSG00000135124	Tier 2	P2RX4	12	121647660	121671909	1	purinergic receptor P2X, ligand-gated ion channel, 4 [Source:HGNC Symbol;Acc:8535]	0	Y	N	N
ENSG00000135486	Tier 2	HNRNPA1	12	54673977	54680872	1	heterogeneous nuclear ribonucleoprotein A1 [Source:HGNC Symbol;Acc:5031]	2	Y	N	N
ENSG00000135577	Tier 2	NMBR	6	142379467	142409936	-1	neuromedin B receptor [Source:HGNC Symbol;Acc:7843]	1	Y	Y	N
ENSG00000135587	Tier 2	SMPD2	6	109761966	109765122	1	sphingomyelin phosphodiesterase 2, neutral membrane (neutral sphingomyelinase) [Source:HGNC Symbol;Acc:11121]	1	Y	N	N
ENSG00000135678	Tier 2	CPM	12	69235977	69365350	-1	carboxypeptidase M [Source:HGNC Symbol;Acc:2311]	0	Y	Y	N
ENSG00000135898	Tier 2	GPR55	2	231772033	231825781	-1	G protein-coupled receptor 55 [Source:HGNC Symbol;Acc:4511]	0	Y	N	N
ENSG00000136098	Tier 2	NEK3	13	52706775	52733996	-1	NIMA-related kinase 3 [Source:HGNC Symbol;Acc:7746]	0	Y	N	N
ENSG00000136448	Tier 2	NMT1	17	43128978	43186384	1	N-myristoyltransferase 1 [Source:HGNC Symbol;Acc:7857]	0	Y	N	N
ENSG00000136810	Tier 2	TXN	9	113006091	113018920	-1	thioredoxin [Source:HGNC Symbol;Acc:12435]	0	Y	Y	N
ENSG00000136869	Tier 2	TLR4	9	120466610	120479149	1	toll-like receptor 4 [Source:HGNC Symbol;Acc:11850]	0	Y	Y	N
ENSG00000136877	Tier 2	FPGS	9	130556876	130576606	1	folylpolyglutamate synthase [Source:HGNC Symbol;Acc:3824]	0	Y	N	N
ENSG00000136931	Tier 2	NR5A1	9	127243516	127269709	-1	nuclear receptor subfamily 5, group A, member 1 [Source:HGNC Symbol;Acc:7983]	0	Y	N	N
ENSG00000136960	Tier 2	ENPP2	8	120569326	120685693	-1	ectonucleotide pyrophosphatase/phosphodiesterase 2 [Source:HGNC Symbol;Acc:3357]	0	Y	Y	N
ENSG00000137055	Tier 2	PLAA	9	26904081	26947461	-1	phospholipase A2-activating protein [Source:HGNC Symbol;Acc:9043]	0	Y	N	N
ENSG00000137168	Tier 2	PPIL1	6	36822603	36842800	-1	peptidylprolyl isomerase (cyclophilin)-like 1 [Source:HGNC Symbol;Acc:9260]	0	N	Y	N
ENSG00000137563	Tier 2	GGH	8	63927638	63951730	-1	gamma-glutamyl hydrolase (conjugase, folylpolygammaglutamyl hydrolase) [Source:HGNC Symbol;Acc:4248]	0	Y	Y	N
ENSG00000137601	Tier 2	NEK1	4	170314426	170533780	-1	NIMA-related kinase 1 [Source:HGNC Symbol;Acc:7744]	1	Y	N	N
ENSG00000137674	Tier 2	MMP20	11	102447566	102496063	-1	matrix metallopeptidase 20 [Source:HGNC Symbol;Acc:7167]	0	Y	Y	N
ENSG00000137675	Tier 2	MMP27	11	102562218	102576537	-1	matrix metallopeptidase 27 [Source:HGNC Symbol;Acc:14250]	1	Y	Y	N
ENSG00000137875	Tier 2	BCL2L10	15	52401460	52404972	-1	BCL2-like 10 (apoptosis facilitator) [Source:HGNC Symbol;Acc:993]	0	Y	N	N
ENSG00000137948	Tier 2	BRDT	1	92414928	92479983	1	bromodomain, testis-specific [Source:HGNC Symbol;Acc:1105]	0	Y	N	N
ENSG00000138030	Tier 2	KHK	2	27309615	27323640	1	ketohexokinase (fructokinase) [Source:HGNC Symbol;Acc:6315]	0	Y	N	N
ENSG00000138032	Tier 2	PPM1B	2	44395108	44471523	1	protein phosphatase, Mg2+/Mn2+ dependent, 1B [Source:HGNC Symbol;Acc:9276]	1	Y	N	N
ENSG00000138207	Tier 2	RBP4	10	95351444	95361501	-1	retinol binding protein 4, plasma [Source:HGNC Symbol;Acc:9922]	1	Y	Y	N
ENSG00000138363	Tier 2	ATIC	2	216176540	216214487	1	5-aminoimidazole-4-carboxamide ribonucleotide formyltransferase/IMP cyclohydrolase [Source:HGNC Symbol;Acc:794]	0	Y	N	N
ENSG00000138395	Tier 2	CDK15	2	202655184	202760273	1	cyclin-dependent kinase 15 [Source:HGNC Symbol;Acc:14434]	0	Y	N	N
ENSG00000138398	Tier 2	PPIG	2	170440850	170497916	1	peptidylprolyl isomerase G (cyclophilin G) [Source:HGNC Symbol;Acc:14650]	0	N	Y	N
ENSG00000138468	Tier 2	SENP7	3	101043049	101232085	-1	SUMO1/sentrin specific peptidase 7 [Source:HGNC Symbol;Acc:30402]	0	Y	N	N
ENSG00000138622	Tier 2	HCN4	15	73612200	73661605	-1	hyperpolarization activated cyclic nucleotide-gated potassium channel 4 [Source:HGNC Symbol;Acc:16882]	2	Y	N	N
ENSG00000138744	Tier 2	NAAA	4	76831809	76862204	-1	N-acylethanolamine acid amidase [Source:HGNC Symbol;Acc:736]	0	Y	N	N
ENSG00000138792	Tier 2	ENPEP	4	111286889	111486441	1	glutamyl aminopeptidase (aminopeptidase A) [Source:HGNC Symbol;Acc:3355]	2	Y	Y	N
ENSG00000138794	Tier 2	CASP6	4	110609785	110624739	-1	caspase 6, apoptosis-related cysteine peptidase [Source:HGNC Symbol;Acc:1507]	1	Y	N	N
ENSG00000139144	Tier 2	PIK3C2G	12	18400548	18801348	1	phosphatidylinositol-4-phosphate 3-kinase, catalytic subunit type 2 gamma [Source:HGNC Symbol;Acc:8973]	0	Y	N	N
ENSG00000139190	Tier 2	VAMP1	12	6571403	6580153	-1	vesicle-associated membrane protein 1 (synaptobrevin 1) [Source:HGNC Symbol;Acc:12642]	0	N	Y	N
ENSG00000139287	Tier 2	TPH2	12	72332626	72580398	1	tryptophan hydroxylase 2 [Source:HGNC Symbol;Acc:20692]	0	Y	N	N
ENSG00000139687	Tier 2	RB1	13	48877887	49056122	1	retinoblastoma 1 [Source:HGNC Symbol;Acc:9884]	0	Y	N	N
ENSG00000140263	Tier 2	SORD	15	45315302	45369383	1	sorbitol dehydrogenase [Source:HGNC Symbol;Acc:11184]	0	Y	Y	N
ENSG00000140287	Tier 2	HDC	15	50534144	50558223	-1	histidine decarboxylase [Source:HGNC Symbol;Acc:4855]	0	Y	N	N
ENSG00000140379	Tier 2	BCL2A1	15	80253231	80263788	-1	BCL2-related protein A1 [Source:HGNC Symbol;Acc:991]	0	Y	N	N
ENSG00000140943	Tier 2	MBTPS1	16	84087368	84150511	-1	membrane-bound transcription factor peptidase, site 1 [Source:HGNC Symbol;Acc:15456]	0	Y	Y	N
ENSG00000141401	Tier 2	IMPA2	18	11981024	12030876	1	inositol(myo)-1(or 4)-monophosphatase 2 [Source:HGNC Symbol;Acc:6051]	0	Y	N	N
ENSG00000141753	Tier 2	IGFBP4	17	38599702	38613983	1	insulin-like growth factor binding protein 4 [Source:HGNC Symbol;Acc:5473]	1	Y	Y	N
ENSG00000141837	Tier 2	CACNA1A	19	13317256	13734804	-1	calcium channel, voltage-dependent, P/Q type, alpha 1A subunit [Source:HGNC Symbol;Acc:1388]	0	Y	N	N
ENSG00000141867	Tier 2	BRD4	19	15347647	15443356	-1	bromodomain containing 4 [Source:HGNC Symbol;Acc:13575]	0	Y	N	N
ENSG00000142082	Tier 2	SIRT3	11	215458	236931	-1	sirtuin 3 [Source:HGNC Symbol;Acc:14931]	6	Y	N	N
ENSG00000142149	Tier 2	HUNK	21	33245628	33416946	1	hormonally up-regulated Neu-associated kinase [Source:HGNC Symbol;Acc:13326]	0	Y	N	N
ENSG00000142230	Tier 2	SAE1	19	47616531	47713886	1	SUMO1 activating enzyme subunit 1 [Source:HGNC Symbol;Acc:30660]	1	Y	N	N
ENSG00000142453	Tier 2	CARM1	19	10982189	11033453	1	coactivator-associated arginine methyltransferase 1 [Source:HGNC Symbol;Acc:23393]	2	Y	N	N
ENSG00000142515	Tier 2	KLK3	19	51358171	51364020	1	kallikrein-related peptidase 3 [Source:HGNC Symbol;Acc:6364]	8	Y	Y	N
ENSG00000142619	Tier 2	PADI3	1	17575593	17610728	1	peptidyl arginine deiminase, type III [Source:HGNC Symbol;Acc:18337]	0	Y	N	N
ENSG00000142623	Tier 2	PADI1	1	17531621	17572500	1	peptidyl arginine deiminase, type I [Source:HGNC Symbol;Acc:18367]	0	Y	N	N
ENSG00000142657	Tier 2	PGD	1	10458649	10480201	1	phosphogluconate dehydrogenase [Source:HGNC Symbol;Acc:8891]	3	Y	N	N
ENSG00000142733	Tier 2	MAP3K6	1	27681675	27693383	-1	mitogen-activated protein kinase kinase kinase 6 [Source:HGNC Symbol;Acc:6858]	0	Y	N	N
ENSG00000142875	Tier 2	PRKACB	1	84543745	84704181	1	protein kinase, cAMP-dependent, catalytic, beta [Source:HGNC Symbol;Acc:9381]	0	Y	N	N
ENSG00000142920	Tier 2	ADC	1	33546705	33586131	1	arginine decarboxylase [Source:HGNC Symbol;Acc:29957]	0	Y	N	N
ENSG00000142949	Tier 2	PTPRF	1	43990858	44089343	1	protein tyrosine phosphatase, receptor type, F [Source:HGNC Symbol;Acc:9670]	2	Y	N	N
ENSG00000143224	Tier 2	PPOX	1	161136200	161147803	1	protoporphyrinogen oxidase [Source:HGNC Symbol;Acc:9280]	0	Y	N	N
ENSG00000143384	Tier 2	MCL1	1	150547032	150552066	-1	myeloid cell leukemia sequence 1 (BCL2-related) [Source:HGNC Symbol;Acc:6943]	1	Y	N	N
ENSG00000143393	Tier 2	PI4KB	1	151264273	151300191	-1	phosphatidylinositol 4-kinase, catalytic, beta [Source:HGNC Symbol;Acc:8984]	0	Y	N	N
ENSG00000143479	Tier 2	DYRK3	1	206808881	206857764	1	dual-specificity tyrosine-(Y)-phosphorylation regulated kinase 3 [Source:HGNC Symbol;Acc:3094]	0	Y	N	N
ENSG00000143603	Tier 2	KCNN3	1	154669931	154842756	-1	potassium intermediate/small conductance calcium-activated channel, subfamily N, member 3 [Source:HGNC Symbol;Acc:6292]	4	Y	N	N
ENSG00000143627	Tier 2	PKLR	1	155259630	155271225	-1	pyruvate kinase, liver and RBC [Source:HGNC Symbol;Acc:9020]	5	Y	N	N
ENSG00000143727	Tier 2	ACP1	2	264140	278283	1	acid phosphatase 1, soluble [Source:HGNC Symbol;Acc:122]	0	Y	N	N
ENSG00000143776	Tier 2	CDC42BPA	1	227177566	227506175	-1	CDC42 binding protein kinase alpha (DMPK-like) [Source:HGNC Symbol;Acc:1737]	0	Y	N	N
ENSG00000143933	Tier 2	CALM2	2	47387221	47403740	-1	calmodulin 2 (phosphorylase kinase, delta) [Source:HGNC Symbol;Acc:1445]	0	Y	Y	N
ENSG00000144407	Tier 2	PTH2R	2	209224438	209719227	1	parathyroid hormone 2 receptor [Source:HGNC Symbol;Acc:9609]	0	N	Y	N
ENSG00000144476	Tier 2	ACKR3	2	237476430	237491001	1	atypical chemokine receptor 3 [Source:HGNC Symbol;Acc:23692]	0	Y	Y	N
ENSG00000144579	Tier 2	CTDSP1	2	219262979	219270664	1	CTD (carboxy-terminal domain, RNA polymerase II, polypeptide A) small phosphatase 1 [Source:HGNC Symbol;Acc:21614]	0	Y	N	N
ENSG00000144959	Tier 2	NCEH1	3	172348039	172429008	-1	neutral cholesterol ester hydrolase 1 [Source:HGNC Symbol;Acc:29260]	0	Y	N	N
ENSG00000145284	Tier 2	SCD5	4	83550692	83720010	-1	stearoyl-CoA desaturase 5 [Source:HGNC Symbol;Acc:21088]	0	Y	N	N
ENSG00000145335	Tier 2	SNCA	4	90645250	90759466	-1	synuclein, alpha (non A4 component of amyloid precursor) [Source:HGNC Symbol;Acc:11138]	13	Y	Y	N
ENSG00000145384	Tier 2	FABP2	4	120238405	120243545	-1	fatty acid binding protein 2, intestinal [Source:HGNC Symbol;Acc:3556]	0	Y	N	N
ENSG00000145451	Tier 2	GLRA3	4	175558065	175750465	-1	glycine receptor, alpha 3 [Source:HGNC Symbol;Acc:4328]	1	Y	Y	N
ENSG00000145632	Tier 2	PLK2	5	57749809	57756087	-1	polo-like kinase 2 [Source:HGNC Symbol;Acc:19699]	0	Y	N	N
ENSG00000145675	Tier 2	PIK3R1	5	67511548	67597649	1	phosphoinositide-3-kinase, regulatory subunit 1 (alpha) [Source:HGNC Symbol;Acc:8979]	0	Y	N	N
ENSG00000145692	Tier 2	BHMT	5	78407602	78428108	1	betaine--homocysteine S-methyltransferase [Source:HGNC Symbol;Acc:1047]	9	Y	N	N
ENSG00000145730	Tier 2	PAM	5	102089685	102366809	1	peptidylglycine alpha-amidating monooxygenase [Source:HGNC Symbol;Acc:8596]	0	Y	Y	N
ENSG00000145982	Tier 2	FARS2	6	5261277	5771813	1	phenylalanyl-tRNA synthetase 2, mitochondrial [Source:HGNC Symbol;Acc:21062]	0	Y	N	N
ENSG00000146276	Tier 2	GABRR1	6	89887220	89940997	-1	gamma-aminobutyric acid (GABA) A receptor, rho 1 [Source:HGNC Symbol;Acc:4090]	1	Y	Y	N
ENSG00000146674	Tier 2	IGFBP3	7	45951949	45961473	-1	insulin-like growth factor binding protein 3 [Source:HGNC Symbol;Acc:5472]	1	Y	Y	N
ENSG00000146678	Tier 2	IGFBP1	7	45927956	45933267	1	insulin-like growth factor binding protein 1 [Source:HGNC Symbol;Acc:5469]	0	Y	Y	N
ENSG00000147044	Tier 2	CASK	X	41374187	41782716	-1	calcium/calmodulin-dependent serine protein kinase (MAGUK family) [Source:HGNC Symbol;Acc:1497]	0	Y	Y	N
ENSG00000147262	Tier 2	GPR119	X	129518319	129519511	-1	G protein-coupled receptor 119 [Source:HGNC Symbol;Acc:19060]	0	Y	Y	N
ENSG00000147432	Tier 2	CHRNB3	8	42552519	42592550	1	cholinergic receptor, nicotinic, beta 3 (neuronal) [Source:HGNC Symbol;Acc:1963]	2	Y	N	N
ENSG00000147434	Tier 2	CHRNA6	8	42607763	42651535	-1	cholinergic receptor, nicotinic, alpha 6 (neuronal) [Source:HGNC Symbol;Acc:15963]	0	Y	Y	N
ENSG00000148734	Tier 2	NPFFR1	10	72007085	72043432	-1	neuropeptide FF receptor 1 [Source:HGNC Symbol;Acc:17425]	0	Y	Y	N
ENSG00000148832	Tier 2	PAOX	10	135192695	135205198	1	polyamine oxidase (exo-N4-amino) [Source:HGNC Symbol;Acc:20837]	1	Y	N	N
ENSG00000149311	Tier 2	ATM	11	108093211	108239829	1	ataxia telangiectasia mutated [Source:HGNC Symbol;Acc:795]	3	Y	N	N
ENSG00000149418	Tier 2	ST14	11	130029457	130080271	1	suppression of tumorigenicity 14 (colon carcinoma) [Source:HGNC Symbol;Acc:11344]	0	Y	N	N
ENSG00000149451	Tier 2	ADAM33	20	3648612	3662893	-1	ADAM metallopeptidase domain 33 [Source:HGNC Symbol;Acc:15478]	0	Y	N	N
ENSG00000149930	Tier 2	TAOK2	16	29984962	30003582	1	TAO kinase 2 [Source:HGNC Symbol;Acc:16835]	2	Y	N	N
ENSG00000151292	Tier 2	CSNK1G3	5	122847793	122952739	1	casein kinase 1, gamma 3 [Source:HGNC Symbol;Acc:2456]	2	Y	N	N
ENSG00000151414	Tier 2	NEK7	1	198126093	198291550	1	NIMA-related kinase 7 [Source:HGNC Symbol;Acc:13386]	0	Y	N	N
ENSG00000151552	Tier 2	QDPR	4	17461884	17513857	-1	quinoid dihydropteridine reductase [Source:HGNC Symbol;Acc:9752]	0	Y	N	N
ENSG00000151632	Tier 2	AKR1C2	10	5029967	5060223	-1	aldo-keto reductase family 1, member C2 [Source:HGNC Symbol;Acc:385]	0	Y	N	N
ENSG00000151651	Tier 2	ADAM8	10	135075907	135090372	-1	ADAM metallopeptidase domain 8 [Source:HGNC Symbol;Acc:215]	0	Y	Y	N
ENSG00000151704	Tier 2	KCNJ1	11	128706210	128737268	-1	potassium inwardly-rectifying channel, subfamily J, member 1 [Source:HGNC Symbol;Acc:6255]	0	Y	Y	N
ENSG00000151790	Tier 2	TDO2	4	156775890	156841558	1	tryptophan 2,3-dioxygenase [Source:HGNC Symbol;Acc:11708]	1	Y	N	N
ENSG00000152034	Tier 2	MCHR2	6	100367786	100442123	-1	melanin-concentrating hormone receptor 2 [Source:HGNC Symbol;Acc:20867]	0	Y	Y	N
ENSG00000152256	Tier 2	PDK1	2	173420101	173489823	1	pyruvate dehydrogenase kinase, isozyme 1 [Source:HGNC Symbol;Acc:8809]	1	Y	N	N
ENSG00000152495	Tier 2	CAMK4	5	110559351	110830584	1	calcium/calmodulin-dependent protein kinase IV [Source:HGNC Symbol;Acc:1464]	0	Y	N	N
ENSG00000152689	Tier 2	RASGRP3	2	33661391	33789817	1	RAS guanyl releasing protein 3 (calcium and DAG-regulated) [Source:HGNC Symbol;Acc:14545]	1	Y	N	N
ENSG00000152904	Tier 2	GGPS1	1	235490665	235507847	1	geranylgeranyl diphosphate synthase 1 [Source:HGNC Symbol;Acc:4249]	0	Y	N	N
ENSG00000152953	Tier 2	STK32B	4	5053169	5502725	1	serine/threonine kinase 32B [Source:HGNC Symbol;Acc:14217]	2	Y	N	N
ENSG00000153002	Tier 2	CPB1	3	148508889	148577974	1	carboxypeptidase B1 (tissue) [Source:HGNC Symbol;Acc:2299]	0	Y	Y	N
ENSG00000153201	Tier 2	RANBP2	2	109335937	109402267	1	RAN binding protein 2 [Source:HGNC Symbol;Acc:9848]	0	N	Y	N
ENSG00000153234	Tier 2	NR4A2	2	157180944	157198860	-1	nuclear receptor subfamily 4, group A, member 2 [Source:HGNC Symbol;Acc:7981]	2	Y	N	N
ENSG00000153802	Tier 2	TMPRSS11D	4	68686594	68749750	-1	transmembrane protease, serine 11D [Source:HGNC Symbol;Acc:24059]	0	Y	Y	N
ENSG00000154025	Tier 2	SLC5A10	17	18853658	18925908	1	solute carrier family 5 (sodium/sugar cotransporter), member 10 [Source:HGNC Symbol;Acc:23155]	0	Y	N	N
ENSG00000154277	Tier 2	UCHL1	4	41258430	41270472	1	ubiquitin carboxyl-terminal esterase L1 (ubiquitin thiolesterase) [Source:HGNC Symbol;Acc:12513]	0	Y	N	N
ENSG00000154678	Tier 2	PDE1C	7	31790793	32338941	-1	phosphodiesterase 1C, calmodulin-dependent 70kDa [Source:HGNC Symbol;Acc:8776]	0	Y	N	N
ENSG00000154734	Tier 2	ADAMTS1	21	28208066	28217728	-1	ADAM metallopeptidase with thrombospondin type 1 motif, 1 [Source:HGNC Symbol;Acc:217]	0	Y	Y	N
ENSG00000154736	Tier 2	ADAMTS5	21	28290231	28338832	-1	ADAM metallopeptidase with thrombospondin type 1 motif, 5 [Source:HGNC Symbol;Acc:221]	0	Y	Y	N
ENSG00000155096	Tier 2	AZIN1	8	103838585	103906092	-1	antizyme inhibitor 1 [Source:HGNC Symbol;Acc:16432]	1	Y	N	N
ENSG00000156110	Tier 2	ADK	10	75910960	76469061	1	adenosine kinase [Source:HGNC Symbol;Acc:257]	3	Y	N	N
ENSG00000156113	Tier 2	KCNMA1	10	78629359	79398353	-1	potassium large conductance calcium-activated channel, subfamily M, alpha member 1 [Source:HGNC Symbol;Acc:6284]	4	Y	N	N
ENSG00000156136	Tier 2	DCK	4	71858255	71896631	1	deoxycytidine kinase [Source:HGNC Symbol;Acc:2704]	0	Y	N	N
ENSG00000156510	Tier 2	HKDC1	10	70980059	71027315	1	hexokinase domain containing 1 [Source:HGNC Symbol;Acc:23302]	1	Y	N	N
ENSG00000157106	Tier 2	SMG1	16	18816175	18937776	-1	SMG1 phosphatidylinositol 3-kinase-related kinase [Source:HGNC Symbol;Acc:30045]	0	Y	N	N
ENSG00000157184	Tier 2	CPT2	1	53662101	53679869	1	carnitine palmitoyltransferase 2 [Source:HGNC Symbol;Acc:2330]	1	Y	N	N
ENSG00000157554	Tier 2	ERG	21	39751949	40033704	-1	v-ets avian erythroblastosis virus E26 oncogene homolog [Source:HGNC Symbol;Acc:3446]	1	Y	N	N
ENSG00000157778	Tier 2	PSMG3	7	1606966	1610641	-1	proteasome (prosome, macropain) assembly chaperone 3 [Source:HGNC Symbol;Acc:22420]	0	Y	N	N
ENSG00000158402	Tier 2	CDC25C	5	137620954	137674044	-1	cell division cycle 25C [Source:HGNC Symbol;Acc:1727]	2	Y	N	N
ENSG00000158786	Tier 2	PLA2G2F	1	20465819	20476879	1	phospholipase A2, group IIF [Source:HGNC Symbol;Acc:30040]	0	Y	Y	N
ENSG00000158859	Tier 2	ADAMTS4	1	161154098	161168846	-1	ADAM metallopeptidase with thrombospondin type 1 motif, 4 [Source:HGNC Symbol;Acc:220]	0	Y	Y	N
ENSG00000158865	Tier 2	SLC5A11	16	24857162	24922949	1	solute carrier family 5 (sodium/inositol cotransporter), member 11 [Source:HGNC Symbol;Acc:23091]	2	Y	N	N
ENSG00000159267	Tier 2	HLCS	21	38123189	38362536	-1	holocarboxylase synthetase (biotin-(proprionyl-CoA-carboxylase (ATP-hydrolysing)) ligase) [Source:HGNC Symbol;Acc:4976]	0	Y	N	N
ENSG00000159403	Tier 2	C1R	12	7187513	7245203	-1	complement component 1, r subcomponent [Source:HGNC Symbol;Acc:1246]	0	Y	Y	N
ENSG00000159593	Tier 2	NAE1	16	66836778	66907159	-1	NEDD8 activating enzyme E1 subunit 1 [Source:HGNC Symbol;Acc:621]	0	Y	N	N
ENSG00000159788	Tier 2	RGS12	4	3294755	3441640	1	regulator of G-protein signaling 12 [Source:HGNC Symbol;Acc:9994]	0	Y	N	N
ENSG00000160014	Tier 2	CALM3	19	47104331	47114050	1	calmodulin 3 (phosphorylase kinase, delta) [Source:HGNC Symbol;Acc:1449]	0	Y	Y	N
ENSG00000160191	Tier 2	PDE9A	21	44073746	44195619	1	phosphodiesterase 9A [Source:HGNC Symbol;Acc:8795]	0	Y	N	N
ENSG00000160211	Tier 2	G6PD	X	153759606	153775787	-1	glucose-6-phosphate dehydrogenase [Source:HGNC Symbol;Acc:4057]	9	Y	N	N
ENSG00000160285	Tier 2	LSS	21	47608055	47648738	-1	lanosterol synthase (2,3-oxidosqualene-lanosterol cyclase) [Source:HGNC Symbol;Acc:6708]	1	Y	N	N
ENSG00000160307	Tier 2	S100B	21	48018875	48025121	-1	S100 calcium binding protein B [Source:HGNC Symbol;Acc:10500]	0	Y	Y	N
ENSG00000161570	Tier 2	CCL5	17	34198495	34207797	-1	chemokine (C-C motif) ligand 5 [Source:HGNC Symbol;Acc:10632]	0	Y	Y	N
ENSG00000161960	Tier 2	EIF4A1	17	7476024	7482323	1	eukaryotic translation initiation factor 4A1 [Source:HGNC Symbol;Acc:3282]	20	Y	N	N
ENSG00000162383	Tier 2	SLC1A7	1	53552855	53608289	-1	solute carrier family 1 (glutamate transporter), member 7 [Source:HGNC Symbol;Acc:10945]	0	Y	N	N
ENSG00000162438	Tier 2	CTRC	1	15764935	15775737	1	chymotrypsin C (caldecrin) [Source:HGNC Symbol;Acc:2523]	0	Y	N	N
ENSG00000162551	Tier 2	ALPL	1	21835858	21904905	1	alkaline phosphatase, liver/bone/kidney [Source:HGNC Symbol;Acc:438]	2	Y	Y	N
ENSG00000162692	Tier 2	VCAM1	1	101185298	101204601	1	vascular cell adhesion molecule 1 [Source:HGNC Symbol;Acc:12663]	0	Y	Y	N
ENSG00000162711	Tier 2	NLRP3	1	247579458	247612410	1	NLR family, pyrin domain containing 3 [Source:HGNC Symbol;Acc:16400]	3	Y	N	N
ENSG00000162728	Tier 2	KCNJ9	1	160051360	160060353	1	potassium inwardly-rectifying channel, subfamily J, member 9 [Source:HGNC Symbol;Acc:6270]	0	Y	Y	N
ENSG00000162881	Tier 2	OXER1	2	42989642	42991401	-1	oxoeicosanoid (OXE) receptor 1 [Source:HGNC Symbol;Acc:24884]	1	Y	Y	N
ENSG00000162889	Tier 2	MAPKAPK2	1	206858289	206907628	1	mitogen-activated protein kinase-activated protein kinase 2 [Source:HGNC Symbol;Acc:6887]	0	Y	N	N
ENSG00000162909	Tier 2	CAPN2	1	223889295	223963720	1	calpain 2, (m/II) large subunit [Source:HGNC Symbol;Acc:1479]	0	Y	N	N
ENSG00000163050	Tier 2	ADCK3	1	227085237	227175246	1	aarF domain containing kinase 3 [Source:HGNC Symbol;Acc:16812]	0	Y	N	N
ENSG00000163098	Tier 2	BIRC8	19	53792856	53794875	-1	baculoviral IAP repeat containing 8 [Source:HGNC Symbol;Acc:14878]	0	Y	N	N
ENSG00000163106	Tier 2	HPGDS	4	95219686	95264027	-1	hematopoietic prostaglandin D synthase [Source:HGNC Symbol;Acc:17890]	3	Y	N	N
ENSG00000163286	Tier 2	ALPPL2	2	233271553	233275424	1	alkaline phosphatase, placental-like 2 [Source:HGNC Symbol;Acc:441]	0	Y	N	N
ENSG00000163295	Tier 2	ALPI	2	233320833	233324742	1	alkaline phosphatase, intestinal [Source:HGNC Symbol;Acc:437]	0	Y	Y	N
ENSG00000163482	Tier 2	STK36	2	219536749	219567439	1	serine/threonine kinase 36 [Source:HGNC Symbol;Acc:17209]	2	Y	N	N
ENSG00000163629	Tier 2	PTPN13	4	87515468	87736324	1	protein tyrosine phosphatase, non-receptor type 13 (APO-1/CD95 (Fas)-associated phosphatase) [Source:HGNC Symbol;Acc:9646]	0	Y	N	N
ENSG00000163631	Tier 2	ALB	4	74262831	74287129	1	albumin [Source:HGNC Symbol;Acc:399]	1	Y	Y	N
ENSG00000163751	Tier 2	CPA3	3	148583043	148614983	1	carboxypeptidase A3 (mast cell) [Source:HGNC Symbol;Acc:2298]	0	Y	Y	N
ENSG00000163788	Tier 2	SNRK	3	43328004	43466256	1	SNF related kinase [Source:HGNC Symbol;Acc:30598]	0	Y	N	N
ENSG00000163931	Tier 2	TKT	3	53258723	53290068	-1	transketolase [Source:HGNC Symbol;Acc:11834]	2	Y	N	N
ENSG00000164045	Tier 2	CDC25A	3	48198636	48229892	-1	cell division cycle 25A [Source:HGNC Symbol;Acc:1725]	0	Y	N	N
ENSG00000164116	Tier 2	GUCY1A3	4	156587863	156653501	1	guanylate cyclase 1, soluble, alpha 3 [Source:HGNC Symbol;Acc:4685]	1	Y	N	N
ENSG00000164120	Tier 2	HPGD	4	175411328	175444305	-1	hydroxyprostaglandin dehydrogenase 15-(NAD) [Source:HGNC Symbol;Acc:5154]	0	Y	N	N
ENSG00000164128	Tier 2	NPY1R	4	164245113	164265984	-1	neuropeptide Y receptor Y1 [Source:HGNC Symbol;Acc:7956]	0	Y	Y	N
ENSG00000164219	Tier 2	PGGT1B	5	114546527	114598569	-1	protein geranylgeranyltransferase type I, beta subunit [Source:HGNC Symbol;Acc:8895]	0	Y	N	N
ENSG00000164251	Tier 2	F2RL1	5	76114758	76131140	1	coagulation factor II (thrombin) receptor-like 1 [Source:HGNC Symbol;Acc:3538]	0	Y	Y	N
ENSG00000164305	Tier 2	CASP3	4	185548850	185570663	-1	caspase 3, apoptosis-related cysteine peptidase [Source:HGNC Symbol;Acc:1504]	1	Y	N	N
ENSG00000164362	Tier 2	TERT	5	1253262	1295184	-1	telomerase reverse transcriptase [Source:HGNC Symbol;Acc:11730]	21	Y	N	N
ENSG00000164588	Tier 2	HCN1	5	45259349	45696253	-1	hyperpolarization activated cyclic nucleotide-gated potassium channel 1 [Source:HGNC Symbol;Acc:4845]	1	Y	N	N
ENSG00000165140	Tier 2	FBP1	9	97365415	97402531	-1	fructose-1,6-bisphosphatase 1 [Source:HGNC Symbol;Acc:3606]	0	Y	N	N
ENSG00000165168	Tier 2	CYBB	X	37639264	37672714	1	cytochrome b-245, beta polypeptide [Source:HGNC Symbol;Acc:2578]	0	Y	N	N
ENSG00000165280	Tier 2	VCP	9	35056061	35073246	-1	valosin containing protein [Source:HGNC Symbol;Acc:12666]	0	Y	N	N
ENSG00000165591	Tier 2	FAAH2	X	57313139	57515629	1	fatty acid amide hydrolase 2 [Source:HGNC Symbol;Acc:26440]	1	Y	N	N
ENSG00000165704	Tier 2	HPRT1	X	133594183	133654543	1	hypoxanthine phosphoribosyltransferase 1 [Source:HGNC Symbol;Acc:5157]	0	Y	N	N
ENSG00000165752	Tier 2	STK32C	10	134020996	134145351	-1	serine/threonine kinase 32C [Source:HGNC Symbol;Acc:21332]	0	Y	N	N
ENSG00000165806	Tier 2	CASP7	10	115438942	115490662	1	caspase 7, apoptosis-related cysteine peptidase [Source:HGNC Symbol;Acc:1508]	1	Y	N	N
ENSG00000165862	Tier 2	PNLIPRP2	10	118380465	118404654	1	pancreatic lipase-related protein 2 [Source:HGNC Symbol;Acc:9157]	0	Y	Y	N
ENSG00000165970	Tier 2	SLC6A5	11	20620946	20680831	1	solute carrier family 6 (neurotransmitter transporter), member 5 [Source:HGNC Symbol;Acc:11051]	0	Y	N	N
ENSG00000166192	Tier 2	SENP8	15	72406599	72433311	1	SUMO/sentrin specific peptidase family member 8 [Source:HGNC Symbol;Acc:22992]	1	Y	N	N
ENSG00000166483	Tier 2	WEE1	11	9595228	9615004	1	WEE1 G2 checkpoint kinase [Source:HGNC Symbol;Acc:12761]	0	Y	N	N
ENSG00000166484	Tier 2	MAPK7	17	19281034	19286857	1	mitogen-activated protein kinase 7 [Source:HGNC Symbol;Acc:6880]	0	Y	N	N
ENSG00000166548	Tier 2	TK2	16	66541906	66586447	-1	thymidine kinase 2, mitochondrial [Source:HGNC Symbol;Acc:11831]	0	Y	N	N
ENSG00000166598	Tier 2	HSP90B1	12	104323885	104347423	1	heat shock protein 90kDa beta (Grp94), member 1 [Source:HGNC Symbol;Acc:12028]	2	Y	Y	N
ENSG00000166670	Tier 2	MMP10	11	102641234	102651359	-1	matrix metallopeptidase 10 (stromelysin 2) [Source:HGNC Symbol;Acc:7156]	0	Y	Y	N
ENSG00000166825	Tier 2	ANPEP	15	90328120	90358633	-1	alanyl (membrane) aminopeptidase [Source:HGNC Symbol;Acc:500]	1	Y	Y	N
ENSG00000166828	Tier 2	SCNN1G	16	23194036	23228204	1	sodium channel, non-voltage-gated 1, gamma subunit [Source:HGNC Symbol;Acc:10602]	0	Y	Y	N
ENSG00000166888	Tier 2	STAT6	12	57489191	57525922	-1	signal transducer and activator of transcription 6, interleukin-4 induced [Source:HGNC Symbol;Acc:11368]	8	Y	N	N
ENSG00000166908	Tier 2	PIP4K2C	12	57984957	57997198	1	phosphatidylinositol-5-phosphate 4-kinase, type II, gamma [Source:HGNC Symbol;Acc:23786]	1	Y	N	N
ENSG00000166948	Tier 2	TGM6	20	2361554	2413399	1	transglutaminase 6 [Source:HGNC Symbol;Acc:16255]	1	Y	N	N
ENSG00000166949	Tier 2	SMAD3	15	67356101	67487533	1	SMAD family member 3 [Source:HGNC Symbol;Acc:6769]	6	Y	N	N
ENSG00000166986	Tier 2	MARS	12	57869228	57911352	1	methionyl-tRNA synthetase [Source:HGNC Symbol;Acc:6898]	0	Y	N	N
ENSG00000167114	Tier 2	SLC27A4	9	131102925	131123749	1	solute carrier family 27 (fatty acid transporter), member 4 [Source:HGNC Symbol;Acc:10998]	0	Y	N	N
ENSG00000167207	Tier 2	NOD2	16	50727514	50766988	1	nucleotide-binding oligomerization domain containing 2 [Source:HGNC Symbol;Acc:5331]	12	Y	N	N
ENSG00000167261	Tier 2	DPEP2	16	68021297	68034489	-1	dipeptidase 2 [Source:HGNC Symbol;Acc:23028]	11	Y	N	N
ENSG00000167280	Tier 2	ENGASE	17	77071021	77084681	1	endo-beta-N-acetylglucosaminidase [Source:HGNC Symbol;Acc:24622]	0	Y	N	N
ENSG00000167508	Tier 2	MVD	16	88718343	88729569	-1	mevalonate (diphospho) decarboxylase [Source:HGNC Symbol;Acc:7529]	0	Y	N	N
ENSG00000167748	Tier 2	KLK1	19	51322404	51327043	-1	kallikrein 1 [Source:HGNC Symbol;Acc:6357]	0	Y	Y	N
ENSG00000167779	Tier 2	IGFBP6	12	53491220	53496129	1	insulin-like growth factor binding protein 6 [Source:HGNC Symbol;Acc:5475]	0	Y	Y	N
ENSG00000167780	Tier 2	SOAT2	12	53497302	53518322	1	sterol O-acyltransferase 2 [Source:HGNC Symbol;Acc:11178]	0	Y	N	N
ENSG00000168036	Tier 2	CTNNB1	3	41236328	41301587	1	catenin (cadherin-associated protein), beta 1, 88kDa [Source:HGNC Symbol;Acc:2514]	0	Y	N	N
ENSG00000168078	Tier 2	PBK	8	27667137	27695612	-1	PDZ binding kinase [Source:HGNC Symbol;Acc:18282]	0	Y	N	N
ENSG00000168329	Tier 2	CX3CR1	3	39304985	39323226	-1	chemokine (C-X3-C motif) receptor 1 [Source:HGNC Symbol;Acc:2558]	0	Y	Y	N
ENSG00000168397	Tier 2	ATG4B	2	242576628	242613272	1	autophagy related 4B, cysteine peptidase [Source:HGNC Symbol;Acc:20790]	0	Y	N	N
ENSG00000168447	Tier 2	SCNN1B	16	23289552	23392620	1	sodium channel, non-voltage-gated 1, beta subunit [Source:HGNC Symbol;Acc:10600]	0	Y	Y	N
ENSG00000168487	Tier 2	BMP1	8	22022249	22069839	1	bone morphogenetic protein 1 [Source:HGNC Symbol;Acc:1067]	0	Y	Y	N
ENSG00000168496	Tier 2	FEN1	11	61560109	61564716	1	flap structure-specific endonuclease 1 [Source:HGNC Symbol;Acc:3650]	105	Y	N	N
ENSG00000168646	Tier 2	AXIN2	17	63524681	63557765	-1	axin 2 [Source:HGNC Symbol;Acc:904]	0	Y	N	N
ENSG00000168925	Tier 2	CTRB1	16	75252898	75258822	1	chymotrypsinogen B1 [Source:HGNC Symbol;Acc:2521]	2	Y	Y	N
ENSG00000168938	Tier 2	PPIC	5	122358945	122372436	-1	peptidylprolyl isomerase C (cyclophilin C) [Source:HGNC Symbol;Acc:9256]	0	N	Y	N
ENSG00000169118	Tier 2	CSNK1G1	15	64457716	64648442	-1	casein kinase 1, gamma 1 [Source:HGNC Symbol;Acc:2454]	0	Y	N	N
ENSG00000169302	Tier 2	STK32A	5	146614526	146767415	1	serine/threonine kinase 32A [Source:HGNC Symbol;Acc:28317]	0	Y	N	N
ENSG00000169618	Tier 2	PROKR1	2	68870721	68882708	1	prokineticin receptor 1 [Source:HGNC Symbol;Acc:4524]	0	Y	Y	N
ENSG00000169684	Tier 2	CHRNA5	15	78857862	78887611	1	cholinergic receptor, nicotinic, alpha 5 (neuronal) [Source:HGNC Symbol;Acc:1959]	27	Y	N	N
ENSG00000169692	Tier 2	AGPAT2	9	139567595	139581875	-1	1-acylglycerol-3-phosphate O-acyltransferase 2 [Source:HGNC Symbol;Acc:325]	0	Y	N	N
ENSG00000169860	Tier 2	P2RY1	3	152552736	152555841	1	purinergic receptor P2Y, G-protein coupled, 1 [Source:HGNC Symbol;Acc:8539]	0	Y	Y	N
ENSG00000169925	Tier 2	BRD3	9	136895427	136933657	-1	bromodomain containing 3 [Source:HGNC Symbol;Acc:1104]	1	Y	N	N
ENSG00000170027	Tier 2	YWHAG	7	75956116	75988348	-1	tyrosine 3-monooxygenase/tryptophan 5-monooxygenase activation protein, gamma [Source:HGNC Symbol;Acc:12852]	0	Y	N	N
ENSG00000170242	Tier 2	USP47	11	11862970	11980870	1	ubiquitin specific peptidase 47 [Source:HGNC Symbol;Acc:20076]	0	Y	N	N
ENSG00000170255	Tier 2	MRGPRX1	11	18955360	18961054	-1	MAS-related GPR, member X1 [Source:HGNC Symbol;Acc:17962]	0	Y	Y	N
ENSG00000170266	Tier 2	GLB1	3	33038100	33138722	-1	galactosidase, beta 1 [Source:HGNC Symbol;Acc:4298]	1	Y	Y	N
ENSG00000170323	Tier 2	FABP4	8	82390654	82395498	-1	fatty acid binding protein 4, adipocyte [Source:HGNC Symbol;Acc:3559]	0	Y	N	N
ENSG00000170345	Tier 2	FOS	14	75745477	75748933	1	FBJ murine osteosarcoma viral oncogene homolog [Source:HGNC Symbol;Acc:3796]	0	Y	N	N
ENSG00000170390	Tier 2	DCLK2	4	150999426	151178609	1	doublecortin-like kinase 2 [Source:HGNC Symbol;Acc:19002]	0	Y	N	N
ENSG00000170522	Tier 2	ELOVL6	4	110967002	111120355	-1	ELOVL fatty acid elongase 6 [Source:HGNC Symbol;Acc:15829]	0	Y	N	N
ENSG00000170835	Tier 2	CEL	9	135937365	135947248	1	carboxyl ester lipase [Source:HGNC Symbol;Acc:1848]	0	Y	Y	N
ENSG00000170890	Tier 2	PLA2G1B	12	120759914	120765592	-1	phospholipase A2, group IB (pancreas) [Source:HGNC Symbol;Acc:9030]	0	Y	Y	N
ENSG00000171049	Tier 2	FPR2	19	52255279	52273779	1	formyl peptide receptor 2 [Source:HGNC Symbol;Acc:3827]	0	Y	Y	N
ENSG00000171051	Tier 2	FPR1	19	52248425	52307363	-1	formyl peptide receptor 1 [Source:HGNC Symbol;Acc:3826]	1	Y	Y	N
ENSG00000171219	Tier 2	CDC42BPG	11	64590859	64612041	-1	CDC42 binding protein kinase gamma (DMPK-like) [Source:HGNC Symbol;Acc:29829]	0	Y	N	N
ENSG00000171509	Tier 2	RXFP1	4	159236463	159574524	1	relaxin/insulin-like family peptide receptor 1 [Source:HGNC Symbol;Acc:19718]	0	Y	Y	N
ENSG00000171517	Tier 2	LPAR3	1	85277285	85358896	-1	lysophosphatidic acid receptor 3 [Source:HGNC Symbol;Acc:14298]	0	Y	N	N
ENSG00000171631	Tier 2	P2RY6	11	72975550	73009662	1	pyrimidinergic receptor P2Y, G-protein coupled, 6 [Source:HGNC Symbol;Acc:8543]	0	Y	Y	N
ENSG00000171860	Tier 2	C3AR1	12	8210898	8219067	-1	complement component 3a receptor 1 [Source:HGNC Symbol;Acc:1319]	0	Y	Y	N
ENSG00000171865	Tier 2	RNASEH1	2	3592383	3606206	-1	ribonuclease H1 [Source:HGNC Symbol;Acc:18466]	0	Y	N	N
ENSG00000171960	Tier 2	PPIH	1	43124096	43142429	1	peptidylprolyl isomerase H (cyclophilin H) [Source:HGNC Symbol;Acc:14651]	0	N	Y	N
ENSG00000172071	Tier 2	EIF2AK3	2	88856259	88927094	-1	eukaryotic translation initiation factor 2-alpha kinase 3 [Source:HGNC Symbol;Acc:3255]	3	Y	N	N
ENSG00000172236	Tier 2	TPSAB1	16	1290697	1292555	1	tryptase alpha/beta 1 [Source:HGNC Symbol;Acc:12019]	0	Y	Y	N
ENSG00000172531	Tier 2	PPP1CA	11	67165654	67188654	-1	protein phosphatase 1, catalytic subunit, alpha isozyme [Source:HGNC Symbol;Acc:9281]	0	Y	N	N
ENSG00000172939	Tier 2	OXSR1	3	38206580	38296979	1	oxidative stress responsive 1 [Source:HGNC Symbol;Acc:8508]	0	Y	N	N
ENSG00000172943	Tier 2	PHF8	X	53963109	54075391	-1	PHD finger protein 8 [Source:HGNC Symbol;Acc:20672]	0	Y	N	N
ENSG00000173039	Tier 2	RELA	11	65421067	65430565	-1	v-rel avian reticuloendotheliosis viral oncogene homolog A [Source:HGNC Symbol;Acc:9955]	2	Y	N	N
ENSG00000173083	Tier 2	HPSE	4	84213614	84256306	-1	heparanase [Source:HGNC Symbol;Acc:5164]	0	Y	Y	N
ENSG00000173120	Tier 2	KDM2A	11	66886740	67025558	1	lysine (K)-specific demethylase 2A [Source:HGNC Symbol;Acc:13606]	0	Y	N	N
ENSG00000173213	Tier 2		18	47225	73545	-1	Tubulin beta-8 chain-like protein LOC260334 [Source:UniProtKB/Swiss-Prot;Acc:A6NNZ2]	0	Y	Y	N
ENSG00000173239	Tier 2	LIPM	10	90562487	90580303	1	lipase, family member M [Source:HGNC Symbol;Acc:23455]	0	Y	N	N
ENSG00000173273	Tier 2	TNKS	8	9413424	9639856	1	tankyrase, TRF1-interacting ankyrin-related ADP-ribose polymerase [Source:HGNC Symbol;Acc:11941]	0	Y	N	N
ENSG00000173366	Tier 2		3	52255097	52265206	-1	TLR9 [Source:UniProtKB/TrEMBL;Acc:C3W5P5]	4	Y	N	N
ENSG00000173486	Tier 2	FKBP2	11	64008475	64011604	1	FK506 binding protein 2, 13kDa [Source:HGNC Symbol;Acc:3718]	1	Y	Y	N
ENSG00000173653	Tier 2	RCE1	11	66610306	66614017	1	Ras converting CAAX endopeptidase 1 [Source:HGNC Symbol;Acc:13721]	0	Y	N	N
ENSG00000173757	Tier 2	STAT5B	17	40351186	40428725	-1	signal transducer and activator of transcription 5B [Source:HGNC Symbol;Acc:11367]	3	Y	N	N
ENSG00000173826	Tier 2	KCNH6	17	61600695	61626338	1	potassium voltage-gated channel, subfamily H (eag-related), member 6 [Source:HGNC Symbol;Acc:18862]	0	Y	N	N
ENSG00000173846	Tier 2	PLK3	1	45265897	45271662	1	polo-like kinase 3 [Source:HGNC Symbol;Acc:2154]	0	Y	N	N
ENSG00000173868	Tier 2	PHOSPHO1	17	47300724	47308128	-1	phosphatase, orphan 1 [Source:HGNC Symbol;Acc:16815]	1	Y	N	N
ENSG00000173876	Tier 2	TUBB8	10	92828	120103	-1	tubulin, beta 8 class VIII [Source:HGNC Symbol;Acc:20773]	0	Y	Y	N
ENSG00000174080	Tier 2	CTSF	11	66330934	66336312	-1	cathepsin F [Source:HGNC Symbol;Acc:2531]	0	Y	N	N
ENSG00000174600	Tier 2	CMKLR1	12	108681821	108733118	-1	chemokine-like receptor 1 [Source:HGNC Symbol;Acc:2121]	0	Y	Y	N
ENSG00000174738	Tier 2	NR1D2	3	23986751	24022109	1	nuclear receptor subfamily 1, group D, member 2 [Source:HGNC Symbol;Acc:7963]	0	Y	N	N
ENSG00000174876	Tier 2	AMY1B	1	104230037	104239302	-1	amylase, alpha 1B (salivary) [Source:HGNC Symbol;Acc:475]	0	Y	Y	N
ENSG00000175054	Tier 2	ATR	3	142168077	142297668	-1	ataxia telangiectasia and Rad3 related [Source:HGNC Symbol;Acc:882]	0	Y	N	N
ENSG00000175354	Tier 2	PTPN2	18	12785477	12929642	-1	protein tyrosine phosphatase, non-receptor type 2 [Source:HGNC Symbol;Acc:9650]	15	Y	N	N
ENSG00000175445	Tier 2	LPL	8	19759228	19824769	1	lipoprotein lipase [Source:HGNC Symbol;Acc:6677]	47	Y	Y	N
ENSG00000175634	Tier 2	RPS6KB2	11	67195931	67202872	1	ribosomal protein S6 kinase, 70kDa, polypeptide 2 [Source:HGNC Symbol;Acc:10437]	0	Y	N	N
ENSG00000176170	Tier 2	SPHK1	17	74372665	74383941	1	sphingosine kinase 1 [Source:HGNC Symbol;Acc:11240]	0	Y	N	N
ENSG00000176393	Tier 2	RNPEP	1	201951500	201975275	1	arginyl aminopeptidase (aminopeptidase B) [Source:HGNC Symbol;Acc:10078]	1	Y	Y	N
ENSG00000176978	Tier 2	DPP7	9	140004994	140009629	-1	dipeptidyl-peptidase 7 [Source:HGNC Symbol;Acc:14892]	0	Y	Y	N
ENSG00000177239	Tier 2	MAN1B1	9	139981379	140003635	1	mannosidase, alpha, class 1B, member 1 [Source:HGNC Symbol;Acc:6823]	0	Y	N	N
ENSG00000177272	Tier 2	KCNA3	1	111214310	111217655	-1	potassium voltage-gated channel, shaker-related subfamily, member 3 [Source:HGNC Symbol;Acc:6221]	0	Y	N	N
ENSG00000177453	Tier 2	NIM1K	5	43192173	43280952	1	NIM1 serine/threonine protein kinase [Source:HGNC Symbol;Acc:28646]	1	Y	N	N
ENSG00000177463	Tier 2	NR2C2	3	14989091	15095107	1	nuclear receptor subfamily 2, group C, member 2 [Source:HGNC Symbol;Acc:7972]	0	Y	N	N
ENSG00000177602	Tier 2	GSG2	17	3627211	3630067	1	germ cell associated 2 (haspin) [Source:HGNC Symbol;Acc:19682]	0	Y	N	N
ENSG00000177606	Tier 2	JUN	1	59246465	59249785	-1	jun proto-oncogene [Source:HGNC Symbol;Acc:6204]	0	Y	N	N
ENSG00000177889	Tier 2	UBE2N	12	93799449	93836038	-1	ubiquitin-conjugating enzyme E2N [Source:HGNC Symbol;Acc:12492]	0	Y	N	N
ENSG00000177954	Tier 2	RPS27	1	153963235	153964626	1	ribosomal protein S27 [Source:HGNC Symbol;Acc:10416]	0	Y	N	N
ENSG00000178700	Tier 2	DHFRL1	3	93766680	93782233	-1	dihydrofolate reductase-like 1 [Source:HGNC Symbol;Acc:27309]	0	Y	N	N
ENSG00000178802	Tier 2	MPI	15	75182346	75191798	1	mannose phosphate isomerase [Source:HGNC Symbol;Acc:7216]	9	Y	N	N
ENSG00000179163	Tier 2	FUCA1	1	24171567	24194784	-1	fucosidase, alpha-L- 1, tissue [Source:HGNC Symbol;Acc:4006]	0	Y	N	N
ENSG00000179295	Tier 2	PTPN11	12	112856155	112947717	1	protein tyrosine phosphatase, non-receptor type 11 [Source:HGNC Symbol;Acc:9644]	66	Y	N	N
ENSG00000179335	Tier 2	CLK3	15	74890841	74932057	1	CDC-like kinase 3 [Source:HGNC Symbol;Acc:2071]	6	Y	N	N
ENSG00000179934	Tier 2	CCR8	3	39371197	39375171	1	chemokine (C-C motif) receptor 8 [Source:HGNC Symbol;Acc:1609]	0	Y	Y	N
ENSG00000180138	Tier 2	CSNK1A1L	13	37677398	37679803	-1	casein kinase 1, alpha 1-like [Source:HGNC Symbol;Acc:20289]	0	Y	N	N
ENSG00000180509	Tier 2	KCNE1	21	35818988	35884573	-1	potassium voltage-gated channel, Isk-related family, member 1 [Source:HGNC Symbol;Acc:6240]	2	Y	N	N
[truncated: 2,481 more rows]

## Sheet: Column Descriptions
Column Name	Description
ensembl_gene_id	The Ensembl gene identifier (from Ensembl version 75)
druggability_tier	The priority tier for the druggable gene. Possible values are Tier 1,Tier 2,Tier 3A, Tier 3B. See the main text methods section for a description on how these were defined.
hgnc_names	The HGNC name for the Ensembl gene ID
chr_b37	The chromosome where the gene resides (from build 37 (GRCh37))
start_b37	The start position of the gene in bp (from build 37 (GRCh37))
end_b37	The end position of the gene in bp (from build 37 (GRCh37))
strand	The strand of the gene. Possible values are 1 and -1
description	A long name for the gene
no_of_gwas_regions	The number of GWAS LD intervals that the gene has overlapped
small_mol_druggable	Is the protein product of the gene targeted, or predicted to be targeted, by a small molecule. Possible values are Y/N (Yes/No)
bio_druggable	Is the protein product of the gene targeted, or predicted to be targeted, by a biotherapeutic (Monoclonal antibody/enzyme or other protein) . Possible values are Y/N (Yes/No)
adme_gene	Is the protein product of the gene involved in absorption, distribution, metabolism, and excretion (ADME) of a compound. Possible values are Y/N (Yes/No)

## Sheet: Legend
Table S1. All the druggable genes, their locations and druggability priority. Additionally, the number of times each gene has overlapped an LD region surrounding a significant GWAS association (P ≤ 5×10-8)) is indicated along with the type of molecule that binds to each of the druggable genes.
