# Supplementary material for: Leveraging pQTL-based Mendelian randomization to identify new treatment prospects for primary biliary cholangitis and primary sclerosing cholangitis
Source: Aging (Albany NY). 2024 May 27;16(10):9228–50. doi: 10.18632/aging.205867 (PMC11164478; doi:10.18632/aging.205867)
Supplement: Supplementary Table 3 [file aging-16-205867-s004.xlsx]

## Sheet: Supplementary Table 3
Supplementary Table 3. Basic information of 1046 druggable genes identified through screening.
file	seqid	protein.(short.name)	protein.(full.name)	gene	uniprot	ensembl.gene.id	entrez.gene.id	hgnc.id
10037_98_SIGLEC12_SIG12.txt.gz	10037_98	SIG12	Sialic acid-binding Ig-like lectin 12	SIGLEC12	Q96PQ1	ENSG00000254521	89858	HGNC:15482
10042_8_SGK3_SGK3.txt.gz	10042_8	SGK3	Serine/threonine-protein kinase Sgk3	SGK3	Q96BR1	ENSG00000104205	23678	HGNC:10812
10070_22_PLCG2_PLCG2.txt.gz	10070_22	PLCG2	1-phosphatidylinositol 4,5-bisphosphate phosphodiesterase gamma-2	PLCG2	P16885	ENSG00000197943	5336	HGNC:9066
10346_5_STAT3_STAT3.txt.gz	10346_5	STAT3	Signal transducer and activator of transcription 3	STAT3	P40763	ENSG00000168610	6774	HGNC:11364
10366_11_PDGFRA_PDGFRA.txt.gz	10366_11	PDGFRA	Platelet-derived growth factor receptor alpha	PDGFRA	P16234	ENSG00000134853	5156	HGNC:8803
10372_18_STAT6_STAT6.txt.gz	10372_18	STAT6	Signal transducer and activator of transcription 6	STAT6	P42226	ENSG00000166888	6778	HGNC:11368
10391_1_ANGPTL3_ANGL3.txt.gz	10391_1	ANGL3	Angiopoietin-related protein 3	ANGPTL3	Q9Y5C1	ENSG00000132855	27329	HGNC:491
10396_6_MCL1_Mcl_1.txt.gz	10396_6	Mcl-1	Induced myeloid leukemia cell differentiation protein Mcl-1	MCL1	Q07820	ENSG00000143384	4170	HGNC:6943
10451_11_NUCB1_NUCB1.txt.gz	10451_11	NUCB1	Nucleobindin-1	NUCB1	Q02818	ENSG00000104805	4924	HGNC:8043
10462_14_INSL5_INSL5.txt.gz	10462_14	INSL5	Insulin-like peptide INSL5	INSL5	Q9Y5Q6	ENSG00000172410	10022	HGNC:6088
10490_3_RPN1_RPN1.txt.gz	10490_3	RPN1	Dolichyl-diphosphooligosaccharide--protein glycosyltransferase subunit 1	RPN1	P04843	ENSG00000163902	6184	HGNC:10381
10511_10_COL6A3_Collagen_alpha_3_VI_.txt.gz	10511_10	Collagen alpha-3(VI)	Collagen alpha-3(VI) chain	COL6A3	P12111	ENSG00000163359	1293	HGNC:2213
10512_13_CSF2RB_IL3RB.txt.gz	10512_13	IL3RB	Cytokine receptor common subunit beta	CSF2RB	P32927	ENSG00000100368	1439	HGNC:2436
10514_5_PTGDS_PGD2_synthase.txt.gz	10514_5	PGD2 synthase	Prostaglandin-H2 D-isomerase	PTGDS	P41222	ENSG00000107317	5730	HGNC:9592
10534_40_PARP1_PARP.txt.gz	10534_40	PARP	Poly [ADP-ribose] polymerase 1	PARP1	P09874	ENSG00000143799	142	HGNC:270
10554_23_GLB1_BGAL.txt.gz	10554_23	BGAL	Beta-galactosidase	GLB1	P16278	ENSG00000170266	2720	HGNC:4298
10561_5_PGLYRP3_PGRP_I_alpha.txt.gz	10561_5	PGRP-I-alpha	Peptidoglycan recognition protein 3	PGLYRP3	Q96LB9	ENSG00000159527	114771	HGNC:30014
10569_28_SCGB1A1_Urinary_protein_1.txt.gz	10569_28	MFAP2	Microfibrillar-associated protein 2	MFAP2	P55001	ENSG00000117122	4237	HGNC:7033
10603_1_HTN3_HIS3.txt.gz	10603_1	HIS3	Histatin-3	HTN3	P15516	ENSG00000205649	3347	HGNC:5284
10620_21_MSMB_PSP_94.txt.gz	10620_21	PSP-94	Beta-microseminoprotein	MSMB	P08118	ENSG00000138294	4477	HGNC:7372
10666_7_GNPTG_GNPTG.txt.gz	10666_7	GNPTG	N-acetylglucosamine-1-phosphotransferase subunit gamma	GNPTG	Q9UJJ9	ENSG00000090581	84572	HGNC:23026
10672_75_SFTPB_SP_B.txt.gz	10672_75	SP-B	Pulmonary surfactant-associated protein B	SFTPB	P07988	ENSG00000168878	6439	HGNC:10801
10702_1_COL28A1_COSA1.txt.gz	10702_1	COSA1	Collagen alpha-1(XXVIII) chain	COL28A1	Q2UY09	ENSG00000215018	340267	HGNC:22442
10708_3_GNRH2_GON2.txt.gz	10708_3	GON2	Progonadoliberin-2	GNRH2	O43555	ENSG00000125787	2797	HGNC:4420
10714_7_ACE_ACE.txt.gz	10714_7	ACE	Angiotensin-converting enzyme	ACE	P12821	ENSG00000159640	1636	HGNC:2707
10722_13_SYK_KSYK.txt.gz	10722_13	KSYK	Tyrosine-protein kinase SYK	SYK	P43405	ENSG00000165025	6850	HGNC:11491
10737_96_SERPINB1_Serpin_B1.txt.gz	10737_96	Serpin B1	Leukocyte elastase inhibitor	SERPINB1	P30740	ENSG00000021355	1992	HGNC:3311
10754_113_PROK2_Prokineticin_2.txt.gz	10754_113	Prokineticin-2	Prokineticin-2	PROK2	Q9HC23	ENSG00000163421	60675	HGNC:18455
10809_14_KLRB1_KLRB1.txt.gz	10809_14	KLRB1	Killer cell lectin-like receptor subfamily B member 1	KLRB1	Q12918	ENSG00000111796	3820	HGNC:6373
10815_2_HABP4_HABP4.txt.gz	10815_2	HABP4	Intracellular hyaluronan-binding protein 4	HABP4	Q5JVS0	ENSG00000130956	22927	HGNC:17062
10818_36_SMPD1_ASM.txt.gz	10818_36	ASM	Sphingomyelin phosphodiesterase	SMPD1	P17405	ENSG00000166311	6609	HGNC:11120
10833_64_HHIP_HHIP.txt.gz	10833_64	HHIP	Hedgehog-interacting protein	HHIP	Q96QV1	ENSG00000164161	64399	HGNC:14866
10851_77_EBI3_IL27B.txt.gz	10851_77	IL27B	Interleukin-27 subunit beta	EBI3	Q14213	ENSG00000105246	10148	HGNC:3129
10907_116_NTM_NTRI.txt.gz	10907_116	NTRI	Neurotrimin	NTM	Q9P121	ENSG00000182667	50863	HGNC:17941
10916_44_PLA2R1_PLA2R.txt.gz	10916_44	PLA2R	Secretory phospholipase A2 receptor	PLA2R1	Q13018	ENSG00000153246	22925	HGNC:9042
10924_258_CYB5D2_NEUFC.txt.gz	10924_258	NEUFC	Neuferricin	CYB5D2	Q8WUJ1	ENSG00000167740	124936	HGNC:28471
10938_13_CD58_sLFA_3.txt.gz	10938_13	sLFA-3	Lymphocyte function-associated antigen 3	CD58	P19256	ENSG00000116815	965	HGNC:1688
10977_55_UCMA_UCMA.txt.gz	10977_55	UCMA	Unique cartilage matrix-associated protein	UCMA	Q8WVF2	ENSG00000165623	221044	HGNC:25205
11102_22_REG4_REG4.txt.gz	11102_22	REG4	Regenerating islet-derived protein 4	REG4	Q9BYZ8	ENSG00000134193	83998	HGNC:22977
11103_24_HSPB1_HSP_27.txt.gz	11103_24	HSP 27	Heat shock protein beta-1	HSPB1	P04792	ENSG00000106211	3315	HGNC:5246
11104_13_CHI3L1_YKL_40.txt.gz	11104_13	YKL-40	Chitinase-3-like protein 1	CHI3L1	P36222	ENSG00000133048	1116	HGNC:1932
11126_102_TRIO_TRIO.txt.gz	11126_102	TRIO	Triple functional domain protein	TRIO	O75962	ENSG00000038382	7204	HGNC:12303
11140_56_COL1A1_CO1A1.txt.gz	11140_56	CO1A1	Collagen alpha-1(I) chain	COL1A1	P02452	ENSG00000108821	1277	HGNC:2197
11142_11_ANGPTL1_ANGL1.txt.gz	11142_11	ANGL1	Angiopoietin-related protein 1	ANGPTL1	O95841	ENSG00000116194	9068	HGNC:489
11152_46_KLK13_kallikrein_13.txt.gz	11152_46	kallikrein 13	Kallikrein-13	KLK13	Q9UKR3	ENSG00000167759	26085	HGNC:6361
11192_168_TINAGL1_TINAL.txt.gz	11192_168	TINAL	Tubulointerstitial nephritis antigen-like	TINAGL1	Q9GZM7	ENSG00000142910	64129	HGNC:19168
11196_31_COL6A3_Collagen_alpha_3_VI_.txt.gz	11196_31	Collagen alpha-3(VI)	Collagen alpha-3(VI) chain	COL6A3	P12111	ENSG00000163359	1293	HGNC:2213
11219_95_FGFBP3_FGFP3.txt.gz	11219_95	FGFP3	Fibroblast growth factor-binding protein 3	FGFBP3	Q8TAT2	ENSG00000174721	143282	HGNC:23428
11237_49_PCOLCE_PCOC1.txt.gz	11237_49	PCOC1	Procollagen C-endopeptidase enhancer 1	PCOLCE	Q15113	ENSG00000106333	5118	HGNC:8738
11257_1_QDPR_DHPR.txt.gz	11257_1	DHPR	Dihydropteridine reductase	QDPR	P09417	ENSG00000151552	5860	HGNC:9752
11265_8_ALDH1A1_Retinal_dehydrogenase_1.txt.gz	11265_8	Retinal dehydrogenase 1	Retinal dehydrogenase 1	ALDH1A1	P00352	ENSG00000165092	216	HGNC:402
11266_8_SELPLG_SELPL.txt.gz	11266_8	SELPL	P-selectin glycoprotein ligand 1	SELPLG	Q14242	ENSG00000110876	6404	HGNC:10722
11273_176_GSTT2B_GSTT2.txt.gz	11273_176	GSTT2	Glutathione S-transferase theta-2B	GSTT2B	P0CG30	NA	2953	HGNC:33437
11302_237_TNR_TENR.txt.gz	11302_237	TENR	Tenascin-R	TNR	Q92752	ENSG00000116147	7143	HGNC:11953
11360_39_RRM1_RRM1.txt.gz	11360_39	RRM1	Ribonucleoside-diphosphate reductase large subunit	RRM1	P23921	ENSG00000167325	6240	HGNC:10451
11369_23_ADH5_ADHX.txt.gz	11369_23	ADHX	Alcohol dehydrogenase class-3	ADH5	P11766	ENSG00000197894	128	HGNC:253
11377_19_ADH7_ADH7.txt.gz	11377_19	ADH7	Alcohol dehydrogenase class 4 mu/sigma chain	ADH7	P40394	ENSG00000196344	131	HGNC:256
11378_37_SYK_KSYK.txt.gz	11378_37	KSYK	Tyrosine-protein kinase SYK	SYK	P43405	ENSG00000165025	6850	HGNC:11491
11388_75_WFDC2_HE4.txt.gz	11388_75	HE4	WAP four-disulfide core domain protein 2	WFDC2	Q14508	ENSG00000101443	10406	HGNC:15939
11390_24_CA8_Carbonic_Anhydrase_VIII.txt.gz	11390_24	Carbonic Anhydrase VIII	Carbonic anhydrase-related protein	CA8	P35219	ENSG00000178538	767	HGNC:1382
11431_235_RECQL_RECQ1.txt.gz	11431_235	RECQ1	ATP-dependent DNA helicase Q1	RECQL	P46063	ENSG00000004700	NA	HGNC:9948
11441_11_PYGL_PYGL.txt.gz	11441_11	PYGL	Glycogen phosphorylase, liver form	PYGL	P06737	ENSG00000100504	5836	HGNC:9725
11480_1_ALDH3A1_Aldehyde_dehydrogenase__class_3.txt.gz	11480_1	Aldehyde dehydrogenase, class 3	Aldehyde dehydrogenase, dimeric NADP-preferring	ALDH3A1	P30838	ENSG00000108602	218	HGNC:405
11510_31_APOL1_Apo_L1.txt.gz	11510_31	Apo L1	Apolipoprotein L1	APOL1	O14791	ENSG00000100342	8542	HGNC:618
11514_196_CD59_CD59.txt.gz	11514_196	CD59	CD59 glycoprotein	CD59	P13987	ENSG00000085063	966	HGNC:1689
11516_7_FABP1_FABPL.txt.gz	11516_7	FABPL	Fatty acid-binding protein, liver	FABP1	P07148	ENSG00000163586	2168	HGNC:3555
11531_24_C10orf54_GI24.txt.gz	11531_24	GI24	V-type immunoglobulin domain-containing suppressor of T-cell activation	C10orf54	Q9H7M9	ENSG00000107738	NA	HGNC:30085
11547_84_MUSK_MUSK.txt.gz	11547_84	MUSK	Muscle, skeletal receptor tyrosine-protein kinase	MUSK	O15146	ENSG00000030304	NA	HGNC:7525
11568_2_FKBP1B_FKB1B.txt.gz	11568_2	FKB1B	Peptidyl-prolyl cis-trans isomerase FKBP1B	FKBP1B	P68106	ENSG00000119782	2281	HGNC:3712
11646_4_CHST9_Carbohydrate_sulfotransferase_9.txt.gz	11646_4	Carbohydrate sulfotransferase 9	Carbohydrate sulfotransferase 9	CHST9	Q7L1S5	ENSG00000154080	83539	HGNC:19898
11708_2_LCN1_LCN1.txt.gz	11708_2	LCN1	Lipocalin-1	LCN1	P31025	ENSG00000160349	3933	HGNC:6525
12008_3_CD7_CD7.txt.gz	12008_3	CD7	T-cell antigen CD7	CD7	P09564	ENSG00000173762	924	HGNC:1695
12329_21_RPS6KA1_KS6A1.txt.gz	12329_21	KS6A1	Ribosomal protein S6 kinase alpha-1	RPS6KA1	Q15418	ENSG00000117676	6195	HGNC:10430
12338_27_EGFLAM_EGFLA.txt.gz	12338_27	EGFLA	Pikachurin	EGFLAM	Q63HQ2	ENSG00000164318	NA	HGNC:26810
12357_41_SNAP29_SNP29.txt.gz	12357_41	SNP29	Synaptosomal-associated protein 29	SNAP29	O95721	ENSG00000099940	9342	HGNC:11133
12370_30_APOF_Apo_F.txt.gz	12370_30	Apo F	Apolipoprotein F	APOF	Q13790	ENSG00000175336	319	HGNC:615
12381_26_CBR1_CBR1.txt.gz	12381_26	CBR1	Carbonyl reductase [NADPH] 1	CBR1	P16152	ENSG00000159228	873	HGNC:1548
12386_11_RNPEP_AMPB.txt.gz	12386_11	AMPB	Aminopeptidase B	RNPEP	Q9H4A4	ENSG00000176393	6051	HGNC:10078
12422_143_ALOX15B_LX15B.txt.gz	12422_143	LX15B	Arachidonate 15-lipoxygenase B	ALOX15B	O15296	ENSG00000179593	NA	HGNC:434
12436_84_GSTO1_GST_omega_1.txt.gz	12436_84	GST omega-1	Glutathione S-transferase omega-1	GSTO1	P78417	ENSG00000148834	9446	HGNC:13312
12437_18_ULK3_ULK3.txt.gz	12437_18	ULK3	Serine/threonine-protein kinase ULK3	ULK3	Q6PHR2	ENSG00000140474	NA	HGNC:19703
12449_16_PPIH_PPIH.txt.gz	12449_16	PPIH	Peptidyl-prolyl cis-trans isomerase H	PPIH	O43447	ENSG00000171960	10465	HGNC:14651
12549_33_HPGDS_PTGD2.txt.gz	12549_33	PTGD2	Hematopoietic prostaglandin D synthase	HPGDS	O60760	ENSG00000163106	27306	HGNC:17890
12612_37_PSMB1_PSB1.txt.gz	12612_37	PSB1	Proteasome subunit beta type-1	PSMB1	P20618	ENSG00000008018	5689	HGNC:9537
12616_45_NRBP1_NRBP.txt.gz	12616_45	NRBP	Nuclear receptor-binding protein	NRBP1	Q9UHY1	ENSG00000115216	NA	HGNC:7993
12703_6_NEK7_NEK7.txt.gz	12703_6	NEK7	Serine/threonine-protein kinase Nek7	NEK7	Q8TDX7	ENSG00000151414	NA	HGNC:13386
12727_7_PTGFRN_FPRP.txt.gz	12727_7	FPRP	Prostaglandin F2 receptor negative regulator	PTGFRN	Q9P2B2	ENSG00000134247	NA	HGNC:9601
12940_35_ALDH3B1_AL3B1.txt.gz	12940_35	AL3B1	Aldehyde dehydrogenase family 3 member B1	ALDH3B1	P43353	NA	221	HGNC:410
12990_39_MAP3K3_MAP3K3.txt.gz	12990_39	MAP3K3	Mitogen-activated protein kinase kinase kinase 3	MAP3K3	Q99759	ENSG00000198909	4215	HGNC:6855
13044_5_TSG101_TS101.txt.gz	13044_5	TS101	Tumor susceptibility gene 101 protein	TSG101	Q99816	ENSG00000074319	7251	HGNC:15971
13088_397_BTC_BTC.txt.gz	13088_397	BTC	Betacellulin	BTC	P35070	ENSG00000174808	685	HGNC:1121
13093_6_SECTM1_SECTM1.txt.gz	13093_6	SECTM1	Secreted and transmembrane protein 1	SECTM1	Q8WVN6	ENSG00000141574	6398	HGNC:10707
13094_75_RSPO3_RSPO3.txt.gz	13094_75	RSPO3	R-spondin-3	RSPO3	Q9BXY4	ENSG00000146374	84870	HGNC:20866
13095_51_REG1A_PSP.txt.gz	13095_51	PSP	Lithostathine-1-alpha	REG1A	P05451	ENSG00000115386	5967	HGNC:9951
13109_82_NEGR1_NEGR1.txt.gz	13109_82	NEGR1	Neuronal growth regulator 1	NEGR1	Q7Z3B1	ENSG00000172260	257194	HGNC:17302
13112_179_FSTL1_FSTL1.txt.gz	13112_179	FSTL1	Follistatin-related protein 1	FSTL1	Q12841	ENSG00000163430	11167	HGNC:3972
13113_7_SPP1_Osteopontin.txt.gz	13113_7	Osteopontin	Osteopontin	SPP1	P10451	ENSG00000118785	6696	HGNC:11255
13114_50_LUM_Lumican.txt.gz	13114_50	Lumican	Lumican	LUM	P51884	ENSG00000139329	4060	HGNC:6724
13116_25_CD177_CD177.txt.gz	13116_25	CD177	CD177 antigen	CD177	Q8N6Q3	NA	57126	HGNC:30072
13118_5_SMOC1_SMOC1.txt.gz	13118_5	SMOC1	SPARC-related modular calcium-binding protein 1	SMOC1	Q9H4F8	ENSG00000198732	64093	HGNC:20318
13119_26_SERPINA10_protein_Z_inhibitor.txt.gz	13119_26	protein Z inhibitor	Protein Z-dependent protease inhibitor	SERPINA10	Q9UK55	ENSG00000140093	51156	HGNC:15996
13122_19_FLRT2_FLRT2.txt.gz	13122_19	FLRT2	Leucine-rich repeat transmembrane protein FLRT2	FLRT2	O43155	ENSG00000185070	23768	HGNC:3761
13124_20_ISLR2_ISLR2.txt.gz	13124_20	ISLR2	Immunoglobulin superfamily containing leucine-rich repeat protein 2	ISLR2	Q6UXK2	ENSG00000167178	57611	HGNC:29286
13133_73_LTBP4_LTBP4.txt.gz	13133_73	LTBP4	Latent-transforming growth factor beta-binding protein 4	LTBP4	Q8N2S1	ENSG00000090006	8425	HGNC:6717
13381_49_B4GALT1_B4GT1.txt.gz	13381_49	B4GT1	Beta-1,4-galactosyltransferase 1	B4GALT1	P15291	ENSG00000086062	2683	HGNC:924
13388_57_PCSK1_NEC1.txt.gz	13388_57	NEC1	Neuroendocrine convertase 1	PCSK1	P29120	ENSG00000175426	5122	HGNC:8743
13397_88_DEFB4A_HBD_2.txt.gz	13397_88	HBD-2	Beta-defensin 4A	DEFB4A	O15263	ENSG00000171711	100289462	HGNC:2767
13405_61_SPINK2_ISK2.txt.gz	13405_61	ISK2	Serine protease inhibitor Kazal-type 2	SPINK2	P20155	ENSG00000128040	6691	HGNC:11245
13438_115_CHRD_CHRD.txt.gz	13438_115	CHRD	Chordin	CHRD	Q9H2X0	ENSG00000090539	8646	HGNC:1949
13460_4_CHAD_CHAD.txt.gz	13460_4	CHAD	Chondroadherin	CHAD	O15335	ENSG00000136457	1101	HGNC:1909
13463_1_PXDN_PXDN.txt.gz	13463_1	PXDN	Peroxidasin homolog	PXDN	Q92626	ENSG00000130508	7837	HGNC:14966
13666_222_CA10_Carbonic_Anhydrase_X.txt.gz	13666_222	Carbonic Anhydrase X	Carbonic anhydrase-related protein 10	CA10	Q9NS85	ENSG00000154975	56934	HGNC:1369
13669_6_FGFR3_FGFR_3.txt.gz	13669_6	FGFR-3	Fibroblast growth factor receptor 3	FGFR3	P22607	ENSG00000068078	2261	HGNC:3690
13671_40_ELANE_Elastase.txt.gz	13671_40	Elastase	Neutrophil elastase	ELANE	P08246	ENSG00000277571	1991	HGNC:3309
13676_46_INHBB_Inhibin_bB_chain.txt.gz	13676_46	Inhibin bB chain	Inhibin beta B chain	INHBB	P09529	ENSG00000163083	3625	HGNC:6067
13682_47_CSF1R_M_CSF_R.txt.gz	13682_47	M-CSF R	Macrophage colony-stimulating factor 1 receptor	CSF1R	P07333	ENSG00000182578	1436	HGNC:2433
13686_2_IL5RA_IL_5_Ra.txt.gz	13686_2	IL-5 Ra	Interleukin-5 receptor subunit alpha	IL5RA	Q01344	ENSG00000091181	3568	HGNC:6017
13692_154_WISP1_WISP_1.txt.gz	13692_154	WISP-1	WNT1-inducible-signaling pathway protein 1	WISP1	O95388	ENSG00000104415	8840	HGNC:12769
13700_10_ANXA2_annexin_II.txt.gz	13700_10	annexin II	Annexin A2	ANXA2	P07355	ENSG00000182718	302	HGNC:537
13717_15_FCN2_FCN2.txt.gz	13717_15	FCN2	Ficolin-2	FCN2	Q15485	ENSG00000160339	2220	HGNC:3624
13719_19_PAK4_PAK4.txt.gz	13719_19	PAK4	Serine/threonine-protein kinase PAK 4	PAK4	O96013	ENSG00000130669	NA	HGNC:16059
13720_95_PRTN3_Proteinase_3.txt.gz	13720_95	Proteinase-3	Myeloblastin	PRTN3	P24158	ENSG00000196415	5657	HGNC:9495
13733_5_IL12B_IL_12_p40.txt.gz	13733_5	IL-12 p40	Interleukin-12 subunit beta	IL12B	P29460	ENSG00000113302	3593	HGNC:5970
13738_8_INHBA_Inhibin_bA_chain.txt.gz	13738_8	Inhibin bA chain	Inhibin beta A chain	INHBA	P08476	ENSG00000122641	3624	HGNC:6066
13740_51_FRZB_sFRP_3.txt.gz	13740_51	sFRP-3	Secreted frizzled-related protein 3	FRZB	Q92765	ENSG00000162998	2487	HGNC:3959
13748_4_CCL8_MCP_2.txt.gz	13748_4	MCP-2	C-C motif chemokine 8	CCL8	P80075	ENSG00000108700	6355	HGNC:10635
13930_3_APOBEC3G_ABC3G.txt.gz	13930_3	ABC3G	DNA dC->dU-editing enzyme APOBEC-3G	APOBEC3G	Q9HC16	ENSG00000239713	60489	HGNC:17357
13944_3_SULT1A3_SULT_1A3.txt.gz	13944_3	SULT 1A3	Sulfotransferase 1A3	SULT1A3	P0DMM9	ENSG00000213599	445329	HGNC:11455
13959_7_LAP3_LAP.txt.gz	13959_7	LAP	Cytosol aminopeptidase	LAP3	P28838	ENSG00000002549	51056	HGNC:18449
13972_4_HSD17B14_DHB14.txt.gz	13972_4	DHB14	17-beta-hydroxysteroid dehydrogenase 14	HSD17B14	Q9BPX1	ENSG00000087076	NA	HGNC:23238
13973_62_TTL_TTL.txt.gz	13973_62	TTL	Tubulin--tyrosine ligase	TTL	Q8NG68	ENSG00000114999	NA	HGNC:21586
14047_78_BDNF_BDNF.txt.gz	14047_78	BDNF	Brain-derived neurotrophic factor	BDNF	P23560	ENSG00000176697	627	HGNC:1033
14048_7_IL1RAP_IL_1_R_AcP.txt.gz	14048_7	IL-1 R AcP	Interleukin-1 Receptor accessory protein	IL1RAP	Q9NPH3	ENSG00000196083	3556	HGNC:5995
14054_17_IL15RA_IL_15_Ra.txt.gz	14054_17	IL-15 Ra	Interleukin-15 receptor subunit alpha	IL15RA	Q13261	ENSG00000134470	3601	HGNC:5978
14076_74_CST4_Cystatin_S.txt.gz	14076_74	Cystatin-S	Cystatin-S	CST4	P01036	ENSG00000101441	1472	HGNC:2476
14079_14_IL18R1_IL_18_Ra.txt.gz	14079_14	IL-18 Ra	Interleukin-18 receptor 1	IL18R1	Q13478	ENSG00000115604	8809	HGNC:5988
14088_38_IGFBP6_IGFBP_6.txt.gz	14088_38	IGFBP-6	Insulin-like growth factor-binding protein 6	IGFBP6	P24592	ENSG00000167779	3489	HGNC:5475
14091_42_CBR3_Carbonyl_reductase_3.txt.gz	14091_42	Carbonyl reductase 3	Carbonyl reductase [NADPH] 3	CBR3	O75828	ENSG00000159231	874	HGNC:1549
14094_29_HBEGF_HB_EGF.txt.gz	14094_29	HB-EGF	Heparin-binding EGF-like growth factor	HBEGF	Q99075	ENSG00000113070	1839	HGNC:3059
14100_63_C1QC_C1QC.txt.gz	14100_63	C1QC	Complement C1q subcomponent subunit C	C1QC	P02747	ENSG00000159189	714	HGNC:1245
14101_2_CNTFR_CNTFR_alpha.txt.gz	14101_2	CNTFR alpha	Ciliary neurotrophic factor receptor subunit alpha	CNTFR	P26992	ENSG00000122756	1271	HGNC:2170
14111_15_THBS2_TSP2.txt.gz	14111_15	TSP2	Thrombospondin-2	THBS2	P35442	ENSG00000186340	7058	HGNC:11786
14112_40_RELT_RELT.txt.gz	14112_40	RELT	Tumor necrosis factor receptor superfamily member 19L	RELT	Q969Z4	ENSG00000054967	84957	HGNC:13764
14123_34_C10orf54_GI24.txt.gz	14123_34	GI24	V-type immunoglobulin domain-containing suppressor of T-cell activation	C10orf54	Q9H7M9	ENSG00000107738	NA	HGNC:30085
14133_93_IL1R2_IL_1_sRII.txt.gz	14133_93	IL-1 sRII	Interleukin-1 receptor type 2	IL1R2	P27930	ENSG00000115590	7850	HGNC:5994
14151_4_ISG15_UCRP.txt.gz	14151_4	UCRP	Ubiquitin-like protein ISG15	ISG15	P05161	ENSG00000187608	9636	HGNC:4053
14273_19_PREP_PPCE.txt.gz	14273_19	PPCE	Prolyl endopeptidase	PREP	P48147	ENSG00000085377	5550	HGNC:9358
14684_17_CAPN2_CAN2.txt.gz	14684_17	CAN2	Calpain-2 catalytic subunit	CAPN2	P17655	ENSG00000162909	824	HGNC:1479
14688_6_PTPN7_PTN7.txt.gz	14688_6	PTN7	Tyrosine-protein phosphatase non-receptor type 7	PTPN7	P35236	ENSG00000143851	NA	HGNC:9659
14708_59_C8G_CO8G.txt.gz	14708_59	CO8G	Complement component C8 gamma chain	C8G	P07360	ENSG00000176919	733	HGNC:1354
14711_27_CST6_Cystatin_M.txt.gz	14711_27	Cystatin M	Cystatin-M	CST6	Q15828	ENSG00000175315	1474	HGNC:2478
14747_9_CRLF1_CRLF1.txt.gz	14747_9	CRLF1	Cytokine receptor-like factor 1	CRLF1	O75462	ENSG00000006016	NA	HGNC:2364
15304_1_REG3A_PAP1.txt.gz	15304_1	PAP1	Regenerating islet-derived protein 3-alpha	REG3A	Q06141	ENSG00000172016	5068	HGNC:8601
15305_7_SCGN_Secretagogin.txt.gz	15305_7	Secretagogin	Secretagogin	SCGN	O76038	ENSG00000079689	10590	HGNC:16941
15308_108_VWC2_VWC2.txt.gz	15308_108	VWC2	Brorin	VWC2	Q2TAL6	ENSG00000188730	375567	HGNC:30200
15333_11_SDF2_SDF2.txt.gz	15333_11	SDF2	Stromal cell-derived factor 2	SDF2	Q99470	ENSG00000132581	6388	HGNC:10675
15343_337_KNG1_Kininogen__HMW__Two_Chain.txt.gz	15343_337	Kininogen, HMW, Two Chain	Kininogen, HMW, Two Chain	KNG1	P01042	ENSG00000113889	3827	HGNC:6383
15363_32_APOA5_Apo_A_V.txt.gz	15363_32	Apo A-V	Apolipoprotein A-V	APOA5	Q6Q788	ENSG00000110243	116519	HGNC:17288
15364_101_APOC1_Apo_C_I.txt.gz	15364_101	Apo C-I	Apolipoprotein C-I	APOC1	P02654	ENSG00000130208	341	HGNC:607
15367_38_BPIFB1_LPLC1.txt.gz	15367_38	LPLC1	BPI fold-containing family B member 1	BPIFB1	Q8TDL5	ENSG00000125999	92747	HGNC:16108
15368_3_BMPER_BMPER.txt.gz	15368_3	BMPER	BMP-binding endothelial regulator protein	BMPER	Q8N8U9	ENSG00000164619	168667	HGNC:24154
15370_5_BOLA1_BOLA1.txt.gz	15370_5	BOLA1	BolA-like protein 1	BOLA1	Q9Y3E2	ENSG00000178096	51027	HGNC:24263
15375_49_CPB1_Carboxypeptidase_B1.txt.gz	15375_49	Carboxypeptidase B1	Carboxypeptidase B	CPB1	P15086	ENSG00000153002	1360	HGNC:2299
15376_134_CTSE_CATE.txt.gz	15376_134	CATE	Cathepsin E	CTSE	P14091	ENSG00000196188	1510	HGNC:2530
15384_15_KL_KLOTHO.txt.gz	15384_15	KLOTHO	Klotho	KL	Q9UEF7	ENSG00000133116	9365	HGNC:6344
15385_116_FABP2_FABP2.txt.gz	15385_116	FABP2	Fatty acid-binding protein, intestinal	FABP2	P12104	ENSG00000145384	2169	HGNC:3556
15386_7_FABP4_FABPA.txt.gz	15386_7	FABPA	Fatty acid-binding protein, adipocyte	FABP4	P15090	ENSG00000170323	2167	HGNC:3559
15388_24_FCGR3A_FcRIIIa.txt.gz	15388_24	FcRIIIa	Low affinity immunoglobulin gamma Fc region receptor III-A	FCGR3A	P08637	ENSG00000203747	2214	HGNC:3619
15391_114_GAS6_GAS_6.txt.gz	15391_114	GAS-6	Growth arrest-specific protein 6	GAS6	Q14393	ENSG00000183087	2621	HGNC:4168
15395_15_GSTM1_GST_M1_1.txt.gz	15395_15	GST M1-1	Glutathione S-transferase Mu 1	GSTM1	P09488	ENSG00000134184	2944	HGNC:4632
15398_2_GFER_HERV1.txt.gz	15398_2	HERV1	FAD-linked sulfhydryl oxidase ALR	GFER	P55789	ENSG00000127554	2671	HGNC:4236
15414_316_LDHA_LDHA.txt.gz	15414_316	LDHA	L-lactate dehydrogenase A chain	LDHA	P00338	ENSG00000134333	3939	HGNC:6535
15417_3_SERPINB5_Maspin.txt.gz	15417_3	Maspin	Serpin B5	SERPINB5	P36952	ENSG00000206075	5268	HGNC:8949
15427_35_LOXL3_LOXL3.txt.gz	15427_35	LOXL3	Lysyl oxidase homolog 3	LOXL3	P58215	ENSG00000115318	84695	HGNC:13869
15435_4_PNP_PNP.txt.gz	15435_4	PNP	Purine nucleoside phosphorylase	PNP	P00491	ENSG00000198805	4860	HGNC:7892
15440_57_PCSK2_NEC2.txt.gz	15440_57	NEC2	Neuroendocrine convertase 2	PCSK2	P16519	ENSG00000125851	5126	HGNC:8744
15444_45_SERPINB4_SCCA2.txt.gz	15444_45	SCCA2	Serpin B4	SERPINB4	P48594	ENSG00000206073	6318	HGNC:10570
15447_45_SORD_Sorbitol_dehydrogenase.txt.gz	15447_45	Sorbitol dehydrogenase	Sorbitol dehydrogenase	SORD	Q00796	ENSG00000140263	6652	HGNC:11184
15452_5_NT5E_5__Nucleotidase.txt.gz	15452_5	5'-Nucleotidase	5'-Nucleotidase	NT5E	P21589	ENSG00000135318	4907	HGNC:8021
15453_3_AMBP_a1_Microglobulin.txt.gz	15453_3	a1-Microglobulin	Alpha-1-microglobulin	AMBP	P02760	ENSG00000106927	259	HGNC:453
15462_28_CD8A_CD8A.txt.gz	15462_28	CD8A	T-cell surface glycoprotein CD8 alpha chain	CD8A	P01732	ENSG00000153563	925	HGNC:1706
15466_30_COL9A1_CO9A1.txt.gz	15466_30	CO9A1	Collagen alpha-1(IX) chain	COL9A1	P20849	ENSG00000112280	1297	HGNC:2217
15468_14_CFHR1_FHR1.txt.gz	15468_14	FHR1	Complement factor H-related protein 1	CFHR1	Q03591	ENSG00000244414	100293069	HGNC:4888
15471_29_PNLIPRP2_LIPR2.txt.gz	15471_29	LIPR2	Pancreatic lipase-related protein 2	PNLIPRP2	P54317	NA	5408	HGNC:9157
15475_4_PLTP_PLTP.txt.gz	15475_4	PLTP	Phospholipid transfer protein	PLTP	P55058	ENSG00000100979	5360	HGNC:9093
15476_6_REG3G_REG3G.txt.gz	15476_6	REG3G	Regenerating islet-derived protein 3-gamma	REG3G	Q6UW15	ENSG00000143954	130120	HGNC:29595
15481_45_CAMP_LL_37.txt.gz	15481_45	LL-37	Antibacterial protein LL-37	CAMP	P49913	ENSG00000164047	820	HGNC:1472
15483_377_AGRN_Agrin.txt.gz	15483_377	Agrin	Agrin	AGRN	O00468	ENSG00000188157	375790	HGNC:329
15486_126_AOC1_ABP1.txt.gz	15486_126	ABP1	Amiloride-sensitive amine oxidase [copper-containing]	AOC1	P19801	ENSG00000002726	26	HGNC:80
15487_164_CES1_carboxylesterase__liver.txt.gz	15487_164	carboxylesterase, liver	Liver carboxylesterase 1	CES1	P23141	ENSG00000198848	1066	HGNC:1863
15491_20_CD248_CD248.txt.gz	15491_20	CD248	Endosialin	CD248	Q9HCU0	ENSG00000174807	57124	HGNC:18219
15494_11_FGFBP1_FGFP1.txt.gz	15494_11	FGFP1	Fibroblast growth factor-binding protein 1	FGFBP1	Q14512	ENSG00000137440	9982	HGNC:19695
15495_9_FOLR3_FOLR3.txt.gz	15495_9	FOLR3	Folate receptor gamma	FOLR3	P41439	ENSG00000110203	2352	HGNC:3795
15499_11_ATRN_Attractin.txt.gz	15499_11	Attractin	Attractin	ATRN	O75882	ENSG00000088812	8455	HGNC:885
15503_15_LEFTY2_Lefty_A.txt.gz	15503_15	Lefty-A	Left-right determination factor 2	LEFTY2	O00292	ENSG00000143768	7044	HGNC:3122
15503_20_LEFTY2_Lefty_A.txt.gz	15503_20	Lefty-A	Left-right determination factor 2	LEFTY2	O00292	ENSG00000143768	7044	HGNC:3122
15509_2_NAGLU_NAG.txt.gz	15509_2	NAG	Alpha-N-acetylglucosaminidase	NAGLU	P54802	ENSG00000108784	4669	HGNC:7632
15513_108_PRSS8_Prostasin.txt.gz	15513_108	Prostasin	Prostasin	PRSS8	Q16651	ENSG00000052344	5652	HGNC:9491
15514_26_BCHE_Pseudocholinesterase.txt.gz	15514_26	Pseudocholinesterase	Cholinesterase	BCHE	P06276	ENSG00000114200	590	HGNC:983
15515_2_SAA1_SAA.txt.gz	15515_2	SAA	Serum amyloid A-1 protein	SAA1	P0DJI8	ENSG00000173432	6288	HGNC:10513
15516_12_SAA4_SAA_4.txt.gz	15516_12	SAA-4	Serum amyloid A-4 protein	SAA4	P35542	ENSG00000148965	6291	HGNC:10516
15521_4_CLSTN1_Alcadein_alpha_1.txt.gz	15521_4	Alcadein alpha-1	Calsyntenin-1	CLSTN1	O94985	ENSG00000171603	22883	HGNC:17447
15525_294_ADH1C_ADH1G.txt.gz	15525_294	ADH1G	Alcohol dehydrogenase 1C	ADH1C	P00326	ENSG00000196616	126	HGNC:251
15526_33_GSS_GSHB.txt.gz	15526_33	GSHB	Glutathione synthetase	GSS	P48637	ENSG00000100983	2937	HGNC:4624
15527_90_DLD_DLDH.txt.gz	15527_90	DLDH	Dihydrolipoyl dehydrogenase, mitochondrial	DLD	P09622	ENSG00000091140	1738	HGNC:2898
15530_33_EPHB4_EphB4.txt.gz	15530_33	EphB4	Ephrin type-B receptor 4	EPHB4	P54760	ENSG00000196411	2050	HGNC:3395
15533_97_MSR1_Macrophage_scavenger_receptor.txt.gz	15533_97	Macrophage scavenger receptor	Macrophage scavenger receptor types I and II	MSR1	P21757	ENSG00000038945	4481	HGNC:7376
15535_3_PRSS27_Marapsin.txt.gz	15535_3	Marapsin	Serine protease 27	PRSS27	Q9BQR3	ENSG00000172382	83886	HGNC:15475
15540_6_VIM_Vimentin.txt.gz	15540_6	Vimentin	Vimentin	VIM	P08670	ENSG00000026025	7431	HGNC:12692
15544_25_KLK14_kallikrein_14.txt.gz	15544_25	kallikrein 14	Kallikrein-14	KLK14	Q9P0G3	ENSG00000129437	43847	HGNC:6362
15556_49_AMY2B_Alpha_amylase_2B.txt.gz	15556_49	Alpha-amylase 2B	Alpha-amylase 2B	AMY2B	P19961	ENSG00000240038	280	HGNC:478
15558_63_ENPEP_AMPE.txt.gz	15558_63	AMPE	Glutamyl aminopeptidase	ENPEP	Q07075	ENSG00000138792	2028	HGNC:3355
15559_5_ANTXR2_ANTR2.txt.gz	15559_5	ANTR2	Anthrax toxin receptor 2	ANTXR2	P58335	ENSG00000163297	118429	HGNC:21732
15560_52_TCN2_Apo_TC_II.txt.gz	15560_52	Apo-TC II	Transcobalamin-2	TCN2	P20062	ENSG00000185339	6948	HGNC:11653
15562_24_GUSB_BGLR.txt.gz	15562_24	BGLR	Beta-glucuronidase	GUSB	P08236	ENSG00000169919	2990	HGNC:4696
15565_102_MUC16_CA125.txt.gz	15565_102	CA125	Mucin-16	MUC16	Q8WXI7	ENSG00000181143	94025	HGNC:15582
15570_99_CR2_Complement_receptor_type_2.txt.gz	15570_99	Complement receptor type 2	Complement receptor type 2	CR2	P20023	ENSG00000117322	1380	HGNC:2336
15573_110_NCAN_CSPG3.txt.gz	15573_110	CSPG3	Neurocan core protein	NCAN	O14594	ENSG00000130287	1463	HGNC:2465
15576_158_RNASE3_ECP.txt.gz	15576_158	ECP	Eosinophil cationic protein	RNASE3	P12724	ENSG00000169397	6037	HGNC:10046
15579_26_ENPP6_ENPP6.txt.gz	15579_26	ENPP6	Ectonucleotide pyrophosphatase/phosphodiesterase family member 6	ENPP6	Q6UWR7	ENSG00000164303	133121	HGNC:23409
15582_25_FCN1_FCN1.txt.gz	15582_25	FCN1	Ficolin-1	FCN1	O00602	ENSG00000085265	2219	HGNC:3623
15584_9_CFHR2_FHR2.txt.gz	15584_9	FHR2	Complement factor H-related protein 2	CFHR2	P36980	ENSG00000080910	3080	HGNC:4890
15585_304_FBLN5_fibulin_5.txt.gz	15585_304	fibulin 5	Fibulin-5	FBLN5	Q9UBX5	ENSG00000140092	10516	HGNC:3602
15587_20_FOLR2_FOLR2.txt.gz	15587_20	FOLR2	Folate receptor beta	FOLR2	P14207	ENSG00000165457	2350	HGNC:3793
15589_1_GC_Gc_Globulin__Mixed_Type.txt.gz	15589_1	Gc-Globulin, Mixed Type	Vitamin D-binding protein	GC	P02774	ENSG00000145321	2638	HGNC:4187
15594_47_HTRA1_HTRA1.txt.gz	15594_47	HTRA1	Serine protease HTRA1	HTRA1	Q92743	ENSG00000166033	5654	HGNC:9476
15602_43_IL6R_IL_6_sRa.txt.gz	15602_43	IL-6 sRa	Interleukin-6 receptor subunit alpha	IL6R	P08887	ENSG00000160712	3570	HGNC:6019
15603_20_ITGA2_Integrin_alpha_2.txt.gz	15603_20	Integrin alpha-2	Integrin alpha-2	ITGA2	P17301	ENSG00000164171	3673	HGNC:6137
15604_18_MAPK9_JNK2.txt.gz	15604_18	JNK2	Mitogen-activated protein kinase 9	MAPK9	P45984	ENSG00000050748	5601	HGNC:6886
15607_56_PKLR_KPYR.txt.gz	15607_56	KPYR	Pyruvate kinase PKLR	PKLR	P30613	ENSG00000143627	5313	HGNC:9020
15610_72_LAP3_LAP.txt.gz	15610_72	LAP	Cytosol aminopeptidase	LAP3	P28838	ENSG00000002549	51056	HGNC:18449
15613_16_PNLIP_LIPP.txt.gz	15613_16	LIPP	Pancreatic triacylglycerol lipase	PNLIP	P16233	ENSG00000175535	5406	HGNC:9155
15614_168_LILRA2_LIRA2.txt.gz	15614_168	LIRA2	Leukocyte immunoglobulin-like receptor subfamily A member 2	LILRA2	Q8N149	ENSG00000239998	11027	HGNC:6603
15617_8_XCL2_lymphotactin_beta.txt.gz	15617_8	lymphotactin beta	Cytokine SCM-1 beta	XCL2	Q9UBD3	ENSG00000143185	6846	HGNC:10646
15620_4_NLGN1_NLGN1.txt.gz	15620_4	NLGN1	Neuroligin-1	NLGN1	Q8N2Q7	ENSG00000169760	22871	HGNC:14291
15622_13_OPCML_OBCAM.txt.gz	15622_13	OBCAM	Opioid-binding protein/cell adhesion molecule	OPCML	Q14982	ENSG00000183715	4978	HGNC:8143
15626_223_HSPG2_Perlecan.txt.gz	15626_223	Perlecan	Basement membrane-specific heparan sulfate proteoglycan core protein	HSPG2	P98160	ENSG00000142798	3339	HGNC:5273
15633_6_RBP4_RBP.txt.gz	15633_6	RBP	Retinol-binding protein 4	RBP4	P02753	ENSG00000138207	5950	HGNC:9922
15635_4_SMOC2_SMOC2.txt.gz	15635_4	SMOC2	SPARC-related modular calcium-binding protein 2	SMOC2	Q9H3U7	ENSG00000112562	64094	HGNC:20323
15644_1_BTD_Biotinidase.txt.gz	15644_1	Biotinidase	Biotinidase	BTD	P43251	ENSG00000169814	686	HGNC:1122
15653_9_COL10A1_COAA1.txt.gz	15653_9	COAA1	Collagen alpha-1(X) chain	COL10A1	Q03692	ENSG00000123500	1300	HGNC:2185
15686_49_INHBC_INHBC.txt.gz	15686_49	INHBC	Inhibin beta C chain	INHBC	P55103	ENSG00000175189	3626	HGNC:6068
16035_8_FLT4_VEGF_sR3.txt.gz	16035_8	VEGF sR3	Vascular endothelial growth factor receptor 3	FLT4	P35916	ENSG00000037280	2324	HGNC:3767
16049_43_OLR1_OLR1.txt.gz	16049_43	OLR1	Oxidized low-density lipoprotein receptor 1	OLR1	P78380	ENSG00000173391	4973	HGNC:8133
16055_3_CFHR5_complement_factor_H_related_5.txt.gz	16055_3	complement factor H-related 5	Complement factor H-related protein 5	CFHR5	Q9BXR6	ENSG00000134389	81494	HGNC:24668
16057_6_IGF2R_IGF_II_receptor.txt.gz	16057_6	IGF-II receptor	Cation-independent mannose-6-phosphate receptor	IGF2R	P11717	ENSG00000197081	3482	HGNC:5467
16060_99_NID2_NID2.txt.gz	16060_99	NID2	Nidogen-2	NID2	Q14112	ENSG00000087303	22795	HGNC:13389
16070_7_WIF1_WIF_1.txt.gz	16070_7	WIF-1	Wnt inhibitory factor 1	WIF1	Q9Y5W5	ENSG00000156076	11197	HGNC:18081
16079_2_TEC_TEC.txt.gz	16079_2	TEC	Tyrosine-protein kinase Tec	TEC	P42680	ENSG00000135605	7006	HGNC:11719
16288_17_EPHA4_EPHA4.txt.gz	16288_17	EPHA4	Ephrin type-A receptor 4	EPHA4	P54764	ENSG00000116106	2043	HGNC:3388
16292_288_GIP_GIP.txt.gz	16292_288	GIP	Gastric inhibitory polypeptide	GIP	P09681	ENSG00000159224	2695	HGNC:4270
16296_43_LGR5_LGR5.txt.gz	16296_43	LGR5	Leucine-rich repeat-containing G-protein coupled receptor 5	LGR5	O75473	ENSG00000139292	8549	HGNC:4504
16302_11_BPIFA2_SPLC2.txt.gz	16302_11	SPLC2	BPI fold-containing family A member 2	BPIFA2	Q96DR5	ENSG00000131050	140683	HGNC:16203
16304_6_LGR4_LGR4.txt.gz	16304_6	LGR4	Leucine-rich repeat-containing G-protein coupled receptor 4	LGR4	Q9BXB1	ENSG00000205213	NA	HGNC:13299
16309_30_DKKL1_Soggy_1.txt.gz	16309_30	Soggy-1	Dickkopf-like protein 1	DKKL1	Q9UK85	ENSG00000104901	27120	HGNC:16528
16318_12_ACVRL1_ALK_1.txt.gz	16318_12	ALK-1	Serine/threonine-protein kinase receptor R3	ACVRL1	P37023	ENSG00000139567	94	HGNC:175
16323_8_NRXN3_NRX3A.txt.gz	16323_8	NRX3A	Neurexin-3	NRXN3	Q9Y4C0	ENSG00000021645	9369	HGNC:8010
16324_38_TLR1_TLR1.txt.gz	16324_38	TLR1	Toll-like receptor 1	TLR1	Q15399	ENSG00000174125	7096	HGNC:11847
16558_2_MYOC_MYOC.txt.gz	16558_2	MYOC	Myocilin	MYOC	Q99972	ENSG00000034971	4653	HGNC:7610
16561_9_A1BG_Alpha_1B_glycoprotein.txt.gz	16561_9	Alpha-1B-glycoprotein	Alpha-1B-glycoprotein	A1BG	P04217	ENSG00000121410	1	HGNC:5
16605_2_C1QTNF9_C1T9A.txt.gz	16605_2	C1T9A	Complement C1q and tumor necrosis factor-related protein 9A	C1QTNF9	P0C862	ENSG00000240654	338872	HGNC:28732
16606_85_AKR1B1_Aldose_reductase.txt.gz	16606_85	Aldose reductase	Aldose reductase	AKR1B1	P15121	ENSG00000085662	231	HGNC:381
16607_78_GSN_Gelsolin.txt.gz	16607_78	Gelsolin	Gelsolin	GSN	P06396	ENSG00000148180	2934	HGNC:4620
16609_106_KIRREL2_KIRR2.txt.gz	16609_106	KIRR2	Kin of IRRE-like protein 2	KIRREL2	Q6UWL6	ENSG00000126259	84063	HGNC:18816
16614_27_RSPO1_RSPO1.txt.gz	16614_27	RSPO1	R-spondin-1	RSPO1	Q2MKA7	ENSG00000169218	284654	HGNC:21679
16620_26_LY75_LY75.txt.gz	16620_26	LY75	Lymphocyte antigen 75	LY75	O60449	ENSG00000054219	4065	HGNC:6729
16621_77_APOA1BP_AIBP.txt.gz	16621_77	AIBP	NAD(P)H-hydrate epimerase	APOA1BP	Q8NCW5	ENSG00000163382	128240	HGNC:18453
16751_15_NPPB_BNP.txt.gz	16751_15	BNP	Natriuretic peptides B	NPPB	P16860	ENSG00000120937	4879	HGNC:7940
16753_46_COL6A2_CO6A2.txt.gz	16753_46	CO6A2	Collagen alpha-2(VI) chain	COL6A2	P12110	ENSG00000142173	1292	HGNC:2212
16758_96_HDGF_HDGF.txt.gz	16758_96	HDGF	Hepatoma-derived growth factor	HDGF	P51858	ENSG00000143321	3068	HGNC:4856
16763_11_LECT2_LECT2.txt.gz	16763_11	LECT2	Leukocyte cell-derived chemotaxin-2	LECT2	O14960	ENSG00000145826	3950	HGNC:6550
16770_3_REG1B_REG1B.txt.gz	16770_3	REG1B	Lithostathine-1-beta	REG1B	P48304	ENSG00000172023	5968	HGNC:9952
16773_29_SCUBE3_SCUB3.txt.gz	16773_29	SCUB3	Signal peptide, CUB and EGF-like domain-containing protein 3	SCUBE3	Q8IX30	ENSG00000146197	222663	HGNC:13655
16781_2_ENGASE_ENASE.txt.gz	16781_2	ENASE	Cytosolic endo-beta-N-acetylglucosaminidase	ENGASE	Q8NFI3	ENSG00000167280	64772	HGNC:24622
16785_45_DEFA5_HD_5.txt.gz	16785_45	HD-5	Defensin-5	DEFA5	Q01523	ENSG00000164816	1670	HGNC:2764
16792_4_SIGLEC5_Siglec_5.txt.gz	16792_4	Siglec-5	Sialic acid-binding Ig-like lectin 5	SIGLEC5	O15389	ENSG00000105501	8778	HGNC:10874
16805_5_PDE5A_PDE5A.txt.gz	16805_5	PDE5A	cGMP-specific 3',5'-cyclic phosphodiesterase	PDE5A	O76074	ENSG00000138735	8654	HGNC:8784
16818_200_CDCP1_CDCP1.txt.gz	16818_200	CDCP1	CUB domain-containing protein 1	CDCP1	Q9H5V8	ENSG00000163814	64866	HGNC:24357
16828_8_COL6A1_Collagen_a1_VI_.txt.gz	16828_8	Collagen a1(VI)	Collagen alpha-1(VI) chain	COL6A1	P12109	ENSG00000142156	1291	HGNC:2211
16836_1_CFHR3_FHR3.txt.gz	16836_1	FHR3	Complement factor H-related protein 3	CFHR3	Q02985	ENSG00000116785	10878	HGNC:16980
16872_248_GSTZ1_MAAI.txt.gz	16872_248	MAAI	Maleylacetoacetate isomerase	GSTZ1	O43708	ENSG00000100577	2954	HGNC:4643
16890_37_ADAMTSL1_ATL1.txt.gz	16890_37	ATL1	ADAMTS-like protein 1	ADAMTSL1	Q8N6G6	ENSG00000178031	92949	HGNC:14632
16892_23_ENPP2_ENPP2.txt.gz	16892_23	ENPP2	Ectonucleotide pyrophosphatase/phosphodiesterase family member 2	ENPP2	Q13822	ENSG00000136960	5168	HGNC:3357
16908_5_OMG_OMGP.txt.gz	16908_5	OMGP	Oligodendrocyte-myelin glycoprotein	OMG	P23515	ENSG00000126861	4974	HGNC:8135
16913_8_RNASET2_RNT2.txt.gz	16913_8	RNT2	Ribonuclease T2	RNASET2	O00584	ENSG00000026297	8635	HGNC:21686
16914_104_CD14_sCD14.txt.gz	16914_104	sCD14	Monocyte differentiation antigen CD14, soluble	CD14	P08571	ENSG00000170458	929	HGNC:1628
16918_198_TLR3_TLR3.txt.gz	16918_198	TLR3	Toll-like receptor 3	TLR3	O15455	ENSG00000164342	7098	HGNC:11849
17138_8_GSTA1_GST_A1_1.txt.gz	17138_8	GST A1-1	Glutathione S-transferase A1	GSTA1	P08263	ENSG00000243955	2938	HGNC:4626
17140_57_PDGFD_PDGFD.txt.gz	17140_57	PDGFD	Platelet-derived growth factor D	PDGFD	Q9GZP0	ENSG00000170962	80310	HGNC:30620
17153_46_KIR2DL3_KI2L3.txt.gz	17153_46	KI2L3	Killer cell immunoglobulin-like receptor 2DL3	KIR2DL3	P43628	ENSG00000276459	3804	HGNC:6331
17156_72_DCLK1_DCAK1.txt.gz	17156_72	DCAK1	Serine/threonine-protein kinase DCLK1	DCLK1	O15075	ENSG00000133083	9201	HGNC:2700
17161_1_DDOST_OST48.txt.gz	17161_1	OST48	Dolichyl-diphosphooligosaccharide--protein glycosyltransferase 48 kDa subunit	DDOST	P39656	ENSG00000244038	1650	HGNC:2728
17170_15_CALCB_CALCB.txt.gz	17170_15	CALCB	Calcitonin gene-related peptide 2	CALCB	P10092	ENSG00000175868	797	HGNC:1438
17224_12_OGN_MIME.txt.gz	17224_12	MIME	Mimecan	OGN	P20774	ENSG00000106809	4969	HGNC:8126
17377_1_AKR1C3_Aldose_reductase_like_C3.txt.gz	17377_1	Aldose reductase-like C3	Aldo-keto reductase family 1 member C3	AKR1C3	P42330	ENSG00000196139	8644	HGNC:386
17396_23_ADH1A_ADH1A.txt.gz	17396_23	ADH1A	Alcohol dehydrogenase 1A	ADH1A	P07327	ENSG00000187758	124	HGNC:249
17398_55_HMOX1_HO_1.txt.gz	17398_55	HO-1	Heme oxygenase 1	HMOX1	P09601	ENSG00000100292	3162	HGNC:5013
17447_52_SFRP4_SFRP4.txt.gz	17447_52	SFRP4	Secreted frizzled-related protein 4	SFRP4	Q6FHJ7	ENSG00000106483	6424	HGNC:10778
17453_34_CP_Ceruloplasmin.txt.gz	17453_34	Ceruloplasmin	Ceruloplasmin	CP	P00450	ENSG00000047457	1356	HGNC:2295
17672_184_GIF_Gastric_intrinsic_factor.txt.gz	17672_184	Gastric intrinsic factor	Gastric intrinsic factor	GIF	P27352	ENSG00000134812	2694	HGNC:4268
17677_47_CD160_BY55.txt.gz	17677_47	BY55	CD160 antigen	CD160	O95971	ENSG00000117281	11126	HGNC:17013
17680_12_EPHB1_EPHB1.txt.gz	17680_12	EPHB1	Ephrin type-B receptor 1	EPHB1	P54762	ENSG00000154928	2047	HGNC:3392
17682_1_CD46_CD46.txt.gz	17682_1	CD46	Membrane cofactor protein	CD46	P15529	ENSG00000117335	4179	HGNC:6953
17685_9_APOA4_Apo_A_IV.txt.gz	17685_9	Apo A-IV	Apolipoprotein A-IV	APOA4	P06727	ENSG00000110244	337	HGNC:602
17691_1_TPP1_TPP1.txt.gz	17691_1	TPP1	Tripeptidyl-peptidase 1	TPP1	O14773	ENSG00000166340	1200	HGNC:2073
17692_2_BTN3A3_BT3A3.txt.gz	17692_2	BT3A3	Butyrophilin subfamily 3 member A3	BTN3A3	O00478	ENSG00000111801	10384	HGNC:1140
17702_53_UGT1A1_UGT_1A1.txt.gz	17702_53	UGT 1A1	UDP-glucuronosyltransferase 1-1	UGT1A1	P22309	ENSG00000241635	54658	HGNC:12530
17722_5_FKBP4_FKBP52_protein.txt.gz	17722_5	FKBP52 protein	Peptidyl-prolyl cis-trans isomerase FKBP4	FKBP4	Q02790	ENSG00000004478	2288	HGNC:3720
17786_5_GGPS1_GGPPS.txt.gz	17786_5	GGPPS	Geranylgeranyl pyrophosphate synthase	GGPS1	O95749	ENSG00000152904	9453	HGNC:4249
17813_21_BPHL_BPHL.txt.gz	17813_21	BPHL	Valacyclovir hydrolase	BPHL	Q86WA6	ENSG00000137274	670	HGNC:1094
17814_8_BPNT1_BPNT1.txt.gz	17814_8	BPNT1	3'(2'),5'-bisphosphate nucleotidase 1	BPNT1	O95861	ENSG00000162813	10380	HGNC:1096
18162_167_IRAK4_IRAK4.txt.gz	18162_167	IRAK4	Interleukin-1 receptor-associated kinase 4	IRAK4	Q9NWZ3	ENSG00000198001	51135	HGNC:17967
18206_18_ADH6_ADH6.txt.gz	18206_18	ADH6	Alcohol dehydrogenase 6	ADH6	P28332	ENSG00000172955	130	HGNC:255
18216_22_IL11RA_IL_11_RA.txt.gz	18216_22	IL-11 RA	Interleukin-11 receptor subunit alpha	IL11RA	Q14626	ENSG00000137070	3590	HGNC:5967
18225_13_HEBP1_HEBP1.txt.gz	18225_13	HEBP1	Heme-binding protein 1	HEBP1	Q9NRV9	ENSG00000013583	50865	HGNC:17176
18340_2_PSMB4_Proteasome_beta_chain.txt.gz	18340_2	Proteasome beta chain	Proteasome subunit beta type-4	PSMB4	P28070	ENSG00000159377	5692	HGNC:9541
18381_16_ALDH2_ALDH_E2.txt.gz	18381_16	ALDH-E2	Aldehyde dehydrogenase, mitochondrial	ALDH2	P05091	ENSG00000111275	217	HGNC:404
18382_109_COMT_Catechol_O_methyltransferase.txt.gz	18382_109	Catechol O-methyltransferase	Catechol O-methyltransferase	COMT	P21964	ENSG00000093010	1312	HGNC:2228
18422_41_MVD_ERG19.txt.gz	18422_41	ERG19	Diphosphomevalonate decarboxylase	MVD	P53602	ENSG00000167508	4597	HGNC:7529
18819_21_PPIC_PPIC.txt.gz	18819_21	PPIC	Peptidyl-prolyl cis-trans isomerase C	PPIC	P45877	ENSG00000168938	5480	HGNC:9256
18830_1_ITLN1_Omentin.txt.gz	18830_1	Omentin	Intelectin-1	ITLN1	Q8WWA0	ENSG00000179914	55600	HGNC:18259
18832_65_SAA2_SAA2.txt.gz	18832_65	SAA2	Serum amyloid A-2 protein	SAA2	P0DJI9	ENSG00000134339	6289	HGNC:10514
18839_24_TG_Thyroglobulin.txt.gz	18839_24	Thyroglobulin	Thyroglobulin	TG	P01266	ENSG00000042832	7038	HGNC:11764
18841_1_SERPINB13_SPB13.txt.gz	18841_1	SPB13	Serpin B13	SERPINB13	Q9UIV8	ENSG00000197641	5275	HGNC:8944
18864_7_PRSS3_TRY3.txt.gz	18864_7	TRY3	Trypsin-3	PRSS3	P35030	ENSG00000010438	5646	HGNC:9486
18873_8_CEACAM8_CEAM8.txt.gz	18873_8	CEAM8	Carcinoembryonic antigen-related cell adhesion molecule 8	CEACAM8	P31997	ENSG00000124469	1088	HGNC:1820
18875_125_COL2A1_Chondrocalcin.txt.gz	18875_125	Chondrocalcin	Chondrocalcin	COL2A1	P02458	ENSG00000139219	1280	HGNC:2200
18876_77_CHST4_CHST4.txt.gz	18876_77	CHST4	Carbohydrate sulfotransferase 4	CHST4	Q8NCG5	ENSG00000140835	10164	HGNC:1972
18878_15_GREM1_GREM1.txt.gz	18878_15	GREM1	Gremlin-1	GREM1	O60565	ENSG00000166923	26585	HGNC:2001
18880_81_COL3A1_Collagen_Type_III.txt.gz	18880_81	Collagen Type III	Collagen Type III	COL3A1	P02461	ENSG00000168542	1281	HGNC:2201
18881_7_CD97_CD97.txt.gz	18881_7	CD97	CD97 antigen	CD97	P48960	ENSG00000123146	976	HGNC:1711
18893_26_GPR56_GPR56.txt.gz	18893_26	GPR56	Adhesion G-protein coupled receptor G1	GPR56	Q9Y653	ENSG00000205336	9289	HGNC:4512
18895_54_GSTM4_GSTM4.txt.gz	18895_54	GSTM4	Glutathione S-transferase Mu 4	GSTM4	Q03013	ENSG00000168765	2948	HGNC:4636
18917_53_AMY2A_Pancreatic_alpha_amylase.txt.gz	18917_53	Pancreatic alpha-amylase	Pancreatic alpha-amylase	AMY2A	P04746	ENSG00000243480	279	HGNC:477
18918_86_PDE4A_PDE4A.txt.gz	18918_86	PDE4A	cAMP-specific 3',5'-cyclic phosphodiesterase 4A	PDE4A	P27815	ENSG00000065989	5141	HGNC:8780
18922_27_CD68_CD68.txt.gz	18922_27	CD68	Macrosialin	CD68	P34810	ENSG00000129226	968	HGNC:1693
18930_28_SLIT2_SLIT2.txt.gz	18930_28	SLIT2	Slit homolog 2 protein	SLIT2	O94813	ENSG00000145147	9353	HGNC:11086
18934_50_TGM2_Tissue_transglutaminase.txt.gz	18934_50	Tissue transglutaminase	Protein-glutamine gamma-glutamyltransferase 2	TGM2	P21980	ENSG00000198959	7052	HGNC:11778
19130_81_SERPINB8_SPB8.txt.gz	19130_81	SPB8	Serpin B8	SERPINB8	P50452	ENSG00000166401	5271	HGNC:8952
19136_22_ALDH6A1_MMSA.txt.gz	19136_22	MMSA	Methylmalonate-semialdehyde dehydrogenase [acylating], mitochondrial	ALDH6A1	Q02252	ENSG00000119711	4329	HGNC:7179
19154_41_SERPINE2_Protease_nexin_I.txt.gz	19154_41	Protease nexin I	Glia-derived nexin	SERPINE2	P07093	ENSG00000135919	5270	HGNC:8951
19207_119_ADK_ADK.txt.gz	19207_119	ADK	Adenosine kinase	ADK	P55263	ENSG00000156110	132	HGNC:257
19213_1_SPINK4_ISK4.txt.gz	19213_1	ISK4	Serine protease inhibitor Kazal-type 4	SPINK4	O60575	ENSG00000122711	27290	HGNC:16646
19238_12_GLUL_GLNA.txt.gz	19238_12	GLNA	Glutamine synthetase	GLUL	P15104	ENSG00000135821	2752	HGNC:4341
19251_56_SRGN_Platelet_proteoglycan.txt.gz	19251_56	Platelet proteoglycan	Serglycin	SRGN	P10124	ENSG00000122862	5552	HGNC:9361
19267_14_HAGH_GLO2.txt.gz	19267_14	GLO2	Hydroxyacylglutathione hydrolase, mitochondrial	HAGH	Q16775	ENSG00000063854	3029	HGNC:4805
19273_3_GSR_Glutathione_reductase.txt.gz	19273_3	Glutathione reductase	Glutathione reductase, mitochondrial	GSR	P00390	ENSG00000104687	2936	HGNC:4623
19334_62_TXNDC12_TXD12.txt.gz	19334_62	TXD12	Thioredoxin domain-containing protein 12	TXNDC12	O95881	ENSG00000117862	51060	HGNC:24626
19347_37_CA12_Carbonic_Anhydrase_XII.txt.gz	19347_37	Carbonic Anhydrase XII	Carbonic anhydrase 12	CA12	O43570	ENSG00000074410	771	HGNC:1371
19361_78_MATN3_MATN3.txt.gz	19361_78	MATN3	Matrilin-3	MATN3	O15232	ENSG00000132031	4148	HGNC:6909
19376_74_NNMT_NNMT.txt.gz	19376_74	NNMT	Nicotinamide N-methyltransferase	NNMT	P40261	ENSG00000166741	4837	HGNC:7861
19377_14_OLFM2_NOE2.txt.gz	19377_14	NOE2	Noelin-2	OLFM2	O95897	ENSG00000105088	93145	HGNC:17189
19437_61_VEGFA_L_VEGF165.txt.gz	19437_61	L-VEGF165	Isoform L-VEGF165	VEGFA	P15692	NA	NA	HGNC:12680
19448_104_UPP1_UPP1.txt.gz	19448_104	UPP1	Uridine phosphorylase 1	UPP1	Q16831	ENSG00000183696	7378	HGNC:12576
19556_12_CR1_Complement_receptor_type_1.txt.gz	19556_12	Complement receptor type 1	Complement receptor type 1	CR1	P17927	ENSG00000203710	1378	HGNC:2334
19581_15_IGFBP5_IGFBP_5.txt.gz	19581_15	IGFBP-5	Insulin-like growth factor-binding protein 5	IGFBP5	P24593	ENSG00000115461	3488	HGNC:5474
19590_46_SFTPD_SP_D.txt.gz	19590_46	SP-D	Pulmonary surfactant-associated protein D	SFTPD	P35247	ENSG00000133661	6441	HGNC:10803
19606_28_IHH_ihh.txt.gz	19606_28	ihh	Indian hedgehog protein	IHH	Q14623	ENSG00000163501	3549	HGNC:5956
19614_8_TCN1_Holo_TC_I.txt.gz	19614_8	Holo-TC I	Transcobalamin-1	TCN1	P20061	ENSG00000134827	6947	HGNC:11652
19622_7_INHBA_Activin_A.txt.gz	19622_7	Activin A	Inhibin beta A chain	INHBA	P08476	ENSG00000122641	3624	HGNC:6066
19631_13_KNG1_Kininostatin.txt.gz	19631_13	Kininostatin	Kininostatin	KNG1	P01042	ENSG00000113889	3827	HGNC:6383
19635_69_FGL2_FGL2.txt.gz	19635_69	FGL2	Fibroleukin	FGL2	Q14314	ENSG00000127951	10875	HGNC:3696
19637_9_CRH_CRH.txt.gz	19637_9	CRH	Corticoliberin	CRH	P06850	ENSG00000147571	1392	HGNC:2355
2190_55_F11_Coagulation_Factor_XI.txt.gz	2190_55	Coagulation Factor XI	Coagulation Factor XI	F11	P03951	ENSG00000088926	2160	HGNC:3529
2192_63_CCL27_CTACK.txt.gz	2192_63	CTACK	C-C motif chemokine 27	CCL27	Q9Y4X3	ENSG00000213927	10850	HGNC:10626
2201_17_COL18A1_Endostatin.txt.gz	2201_17	Endostatin	Endostatin	COL18A1	P39060	ENSG00000182871	80781	HGNC:2195
2212_69_PLAT_tPA.txt.gz	2212_69	tPA	Tissue-type plasminogen activator	PLAT	P00750	ENSG00000104368	5327	HGNC:9051
2278_61_TIMP2_TIMP_2.txt.gz	2278_61	TIMP-2	Metalloproteinase inhibitor 2	TIMP2	P16035	ENSG00000035862	7077	HGNC:11821
2381_52_C5_C5.txt.gz	2381_52	C5	Complement C5	C5	P01031	ENSG00000106804	727	HGNC:1331
2418_55_APOE_Apo_E.txt.gz	2418_55	Apo E	Apolipoprotein E	APOE	P02649	ENSG00000130203	348	HGNC:613
2421_7_BDNF_BDNF.txt.gz	2421_7	BDNF	Brain-derived neurotrophic factor	BDNF	P23560	ENSG00000176697	627	HGNC:1033
2436_49_CXCL16_CXCL16__soluble.txt.gz	2436_49	CXCL16, soluble	C-X-C motif chemokine 16	CXCL16	Q9H2A7	ENSG00000161921	58191	HGNC:16642
2474_54_APCS_SAP.txt.gz	2474_54	SAP	Serum amyloid P-component	APCS	P02743	ENSG00000132703	325	HGNC:584
2475_1_KIT_SCF_sR.txt.gz	2475_1	SCF sR	Mast/stem cell growth factor receptor Kit	KIT	P10721	ENSG00000157404	3815	HGNC:6342
2480_58_TIMP3_TIMP_3.txt.gz	2480_58	TIMP-3	Metalloproteinase inhibitor 3	TIMP3	P35625	ENSG00000100234	7078	HGNC:11822
2516_57_CCL21_6Ckine.txt.gz	2516_57	6Ckine	C-C motif chemokine 21	CCL21	O00585	ENSG00000137077	6366	HGNC:10620
2567_5_CFI_Factor_I.txt.gz	2567_5	Factor I	Complement factor I	CFI	P05156	ENSG00000205403	3426	HGNC:5394
2571_12_IGFBP3_IGFBP_3.txt.gz	2571_12	IGFBP-3	Insulin-like growth factor-binding protein 3	IGFBP3	P17936	ENSG00000146674	3486	HGNC:5472
2579_17_MMP9_MMP_9.txt.gz	2579_17	MMP-9	Matrix metalloproteinase-9	MMP9	P14780	ENSG00000100985	4318	HGNC:7176
2580_83_MPO_Myeloperoxidase.txt.gz	2580_83	Myeloperoxidase	Myeloperoxidase	MPO	P05164	ENSG00000005381	4353	HGNC:7218
2590_69_ROR1_ROR1.txt.gz	2590_69	ROR1	Inactive tyrosine-protein kinase transmembrane receptor ROR1	ROR1	Q01973	ENSG00000185483	4919	HGNC:10256
2597_8_VEGFA_VEGF.txt.gz	2597_8	VEGF	Vascular endothelial growth factor A	VEGFA	P15692	ENSG00000112715	7422	HGNC:12680
2602_2_ANGPT2_Angiopoietin_2.txt.gz	2602_2	Angiopoietin-2	Angiopoietin-2	ANGPT2	O15123	ENSG00000091879	285	HGNC:485
2609_59_CST3_Cystatin_C.txt.gz	2609_59	Cystatin C	Cystatin-C	CST3	P01034	ENSG00000101439	1471	HGNC:2475
2611_72_TYRO3_Dtk.txt.gz	2611_72	Dtk	Tyrosine-protein kinase receptor TYRO3	TYRO3	Q06418	ENSG00000092445	7301	HGNC:12446
2615_60_EFNA5_Ephrin_A5.txt.gz	2615_60	Ephrin-A5	Ephrin-A5	EFNA5	P52803	ENSG00000184349	1946	HGNC:3225
2617_56_ERBB3_ERBB3.txt.gz	2617_56	ERBB3	Receptor tyrosine-protein kinase erbB-3	ERBB3	P21860	ENSG00000065361	2065	HGNC:3431
2620_4_IL6ST_gp130__soluble.txt.gz	2620_4	gp130, soluble	Interleukin-6 receptor subunit beta	IL6ST	P40189	ENSG00000134352	3572	HGNC:6021
2631_50_IL10RB_IL_10_Rb.txt.gz	2631_50	IL-10 Rb	Interleukin-10 receptor subunit beta	IL10RB	Q08334	ENSG00000243646	3588	HGNC:5965
2632_5_IL12RB1_IL_12_Rb1.txt.gz	2632_5	IL-12 Rb1	Interleukin-12 receptor subunit beta-1	IL12RB1	P42701	ENSG00000096996	3594	HGNC:5971
2637_77_MRC1_Macrophage_mannose_receptor.txt.gz	2637_77	Macrophage mannose receptor	Macrophage mannose receptor 1	MRC1	P22897	ENSG00000120586	4360	HGNC:7228
2644_11_PRKCA_PKC_A.txt.gz	2644_11	PKC-A	Protein kinase C alpha type	PRKCA	P17252	ENSG00000154229	5578	HGNC:9393
2652_15_PLAUR_suPAR.txt.gz	2652_15	suPAR	Urokinase plasminogen activator surface receptor	PLAUR	Q03405	ENSG00000011422	5329	HGNC:9053
2654_19_TNFRSF1A_TNF_sR_I.txt.gz	2654_19	TNF sR-I	Tumor necrosis factor receptor superfamily member 1A	TNFRSF1A	P19438	ENSG00000067182	7132	HGNC:11916
2658_27_NTRK3_TrkC.txt.gz	2658_27	TrkC	NT-3 growth factor receptor	NTRK3	Q16288	ENSG00000140538	4916	HGNC:8033
2665_26_TNFRSF17_BCMA.txt.gz	2665_26	BCMA	Tumor necrosis factor receptor superfamily member 17	TNFRSF17	Q02223	ENSG00000048462	608	HGNC:11913
2677_1_EGFR_ERBB1.txt.gz	2677_1	ERBB1	Epidermal growth factor receptor	EGFR	P00533	ENSG00000146648	1956	HGNC:3236
2681_23_HGF_HGF.txt.gz	2681_23	HGF	Hepatocyte growth factor	HGF	P14210	ENSG00000019991	3082	HGNC:4893
2683_1_C3_iC3b.txt.gz	2683_1	iC3b	Complement C3b, inactivated	C3	P01024	ENSG00000125730	718	HGNC:1318
2687_2_MIA_MIA.txt.gz	2687_2	MIA	Melanoma-derived growth regulatory protein	MIA	Q16674	ENSG00000261857	8190	HGNC:7076
2692_74_PLA2G2A_NPS_PLA2.txt.gz	2692_74	NPS-PLA2	Phospholipase A2, membrane associated	PLA2G2A	P14555	ENSG00000188257	5320	HGNC:9031
2697_7_PF4_PF_4.txt.gz	2697_7	PF-4	Platelet factor 4	PF4	P02776	ENSG00000163737	5196	HGNC:8861
2700_56_PROS1_Protein_S.txt.gz	2700_56	Protein S	Vitamin K-dependent protein S	PROS1	P07225	ENSG00000184500	5627	HGNC:9456
2705_5_CCL25_TECK.txt.gz	2705_5	TECK	C-C motif chemokine 25	CCL25	O15444	ENSG00000131142	6370	HGNC:10624
2731_29_POR_NADPH_P450_Oxidoreductase.txt.gz	2731_29	NADPH-P450 Oxidoreductase	NADPH--cytochrome P450 reductase	POR	P16435	ENSG00000127948	5447	HGNC:9208
2737_22_NOV_NovH.txt.gz	2737_22	NovH	Protein NOV homolog	NOV	P48745	ENSG00000136999	4856	HGNC:7885
2741_22_SIGLEC6_Siglec_6.txt.gz	2741_22	Siglec-6	Sialic acid-binding Ig-like lectin 6	SIGLEC6	O43699	ENSG00000105492	946	HGNC:10875
2742_68_SIGLEC7_Siglec_7.txt.gz	2742_68	Siglec-7	Sialic acid-binding Ig-like lectin 7	SIGLEC7	Q9Y286	ENSG00000168995	27036	HGNC:10876
2743_5_SHH_Sonic_Hedgehog.txt.gz	2743_5	Sonic Hedgehog	Sonic hedgehog protein	SHH	Q15465	ENSG00000164690	6469	HGNC:10848
2750_3_APOA1_Apo_A_I.txt.gz	2750_3	Apo A-I	Apolipoprotein A-I	APOA1	P02647	ENSG00000118137	335	HGNC:600
2754_50_C3_C3.txt.gz	2754_50	C3	Complement C3	C3	P01024	ENSG00000125730	718	HGNC:1318
2771_35_IGFBP1_IGFBP_1.txt.gz	2771_35	IGFBP-1	Insulin-like growth factor-binding protein 1	IGFBP1	P08833	ENSG00000146678	3484	HGNC:5469
2774_10_IL16_IL_16.txt.gz	2774_10	IL-16	Interleukin-16	IL16	Q14005	ENSG00000172349	3603	HGNC:5980
2778_10_IL22_IL_22.txt.gz	2778_10	IL-22	Interleukin-22	IL22	Q9GZX6	ENSG00000127318	50616	HGNC:14900
2780_35_LTF_Lactoferrin.txt.gz	2780_35	Lactoferrin	Lactotransferrin	LTF	P02788	ENSG00000012223	4057	HGNC:6720
2783_18_CCL3L1_LD78_beta.txt.gz	2783_18	LD78-beta	C-C motif chemokine 3-like 1	CCL3L1	P16619	ENSG00000205021	414062	HGNC:10628
2789_26_MMP7_MMP_7.txt.gz	2789_26	MMP-7	Matrilysin	MMP7	P09237	ENSG00000137673	4316	HGNC:7174
2797_56_APOB_Apo_B.txt.gz	2797_56	Apo B	Apolipoprotein B	APOB	P04114	ENSG00000084674	338	HGNC:603
2811_27_ANGPT1_Angiopoietin_1.txt.gz	2811_27	Angiopoietin-1	Angiopoietin-1	ANGPT1	Q15389	ENSG00000154188	284	HGNC:484
2813_11_AGRP_ART.txt.gz	2813_11	ART	Agouti-related protein	AGRP	O00253	ENSG00000159723	181	HGNC:330
2816_50_BCAM_BCAM.txt.gz	2816_50	BCAM	Basal Cell Adhesion Molecule	BCAM	P50895	ENSG00000187244	4059	HGNC:6722
2819_23_CDH5_Cadherin_5.txt.gz	2819_23	Cadherin-5	Cadherin-5	CDH5	P33151	ENSG00000179776	1003	HGNC:1764
2827_23_CX3CL1_Fractalkine_CX3CL_1.txt.gz	2827_23	Fractalkine/CX3CL-1	Fractalkine	CX3CL1	P78423	ENSG00000006210	6376	HGNC:10647
2828_82_SPINT1_HAI_1.txt.gz	2828_82	HAI-1	Kunitz-type protease inhibitor 1	SPINT1	O43278	ENSG00000166145	6692	HGNC:11246
2831_29_KLK11_Kallikrein_11.txt.gz	2831_29	Kallikrein 11	Kallikrein-11	KLK11	Q9UBX7	ENSG00000167757	11012	HGNC:6359
2834_54_KLK8_kallikrein_8.txt.gz	2834_54	kallikrein 8	Kallikrein-8	KLK8	O60259	ENSG00000129455	11202	HGNC:6369
2836_68_LCN2_Lipocalin_2.txt.gz	2836_68	Lipocalin 2	Neutrophil gelatinase-associated lipocalin	LCN2	P80188	ENSG00000148346	3934	HGNC:6526
2837_3_MET_Met.txt.gz	2837_3	Met	Hepatocyte growth factor receptor	MET	P08581	ENSG00000105976	4233	HGNC:7029
2843_13_SPINT2_SPINT2.txt.gz	2843_13	SPINT2	Kunitz-type protease inhibitor 2	SPINT2	O43291	ENSG00000167642	10653	HGNC:11247
2844_53_TIE1_sTie_1.txt.gz	2844_53	sTie-1	Tyrosine-protein kinase receptor Tie-1, soluble	TIE1	P35590	ENSG00000066056	7075	HGNC:11809
2851_63_C5_C5a.txt.gz	2851_63	C5a	C5a anaphylatoxin	C5	P01031	ENSG00000106804	727	HGNC:1331
2855_49_MAPK3_ERK_1.txt.gz	2855_49	ERK-1	Mitogen-activated protein kinase 3	MAPK3	P27361	ENSG00000102882	5595	HGNC:6877
2864_2_MAP2K1_MEK1.txt.gz	2864_2	MEK1	Dual specificity mitogen-activated protein kinase kinase 1	MAP2K1	Q02750	ENSG00000169032	5604	HGNC:6840
2879_9_SERPINA3_a1_Antichymotrypsin.txt.gz	2879_9	a1-Antichymotrypsin	Alpha-1-antichymotrypsin	SERPINA3	P01011	ENSG00000196136	12	HGNC:16
2888_49_C7_C7.txt.gz	2888_49	C7	Complement component C7	C7	P10643	ENSG00000112936	730	HGNC:1346
2890_59_CCL28_CCL28.txt.gz	2890_59	CCL28	C-C motif chemokine 28	CCL28	Q9NRJ3	ENSG00000151882	56477	HGNC:17700
2900_53_CCL14_HCC_1.txt.gz	2900_53	HCC-1	C-C motif chemokine 14	CCL14	Q16627	ENSG00000213494	6358	HGNC:10612
2911_27_MDK_Midkine.txt.gz	2911_27	Midkine	Midkine	MDK	P21741	ENSG00000110492	4192	HGNC:6972
2913_1_CCL23_MPIF_1.txt.gz	2913_1	MPIF-1	C-C motif chemokine 23	CCL23	P55773	ENSG00000167236	6368	HGNC:10622
2925_9_SERPINE1_PAI_1.txt.gz	2925_9	PAI-1	Plasminogen activator inhibitor 1	SERPINE1	P05121	ENSG00000106366	5054	HGNC:8583
2944_66_NBL1_DAN.txt.gz	2944_66	DAN	Neuroblastoma suppressor of tumorigenicity 1	NBL1	P41271	ENSG00000158747	4681	HGNC:7650
2946_52_CFD_Factor_D.txt.gz	2946_52	Factor D	Complement factor D	CFD	P00746	ENSG00000197766	1675	HGNC:2771
2948_58_GHR_Growth_hormone_receptor.txt.gz	2948_58	Growth hormone receptor	Growth hormone receptor	GHR	P10912	ENSG00000112964	2690	HGNC:4263
2950_57_IGFBP4_IGFBP_4.txt.gz	2950_57	IGFBP-4	Insulin-like growth factor-binding protein 4	IGFBP4	P22692	ENSG00000141753	3487	HGNC:5473
2961_1_PROC_Protein_C.txt.gz	2961_1	Protein C	Vitamin K-dependent protein C	PROC	P04070	ENSG00000115718	5624	HGNC:9451
2962_50_PTHLH_PTHrP.txt.gz	2962_50	PTHrP	Parathyroid hormone-related protein	PTHLH	P12272	ENSG00000087494	5744	HGNC:9607
2966_65_CLEC11A_SCGF_beta.txt.gz	2966_65	SCGF-beta	Stem cell growth factor-beta	CLEC11A	Q9Y240	ENSG00000105472	6320	HGNC:10576
2968_61_TNFSF15_TNFSF15.txt.gz	2968_61	TNFSF15	Tumor necrosis factor ligand superfamily member 15	TNFSF15	O95150	ENSG00000181634	9966	HGNC:11931
2972_57_BMP7_BMP_7.txt.gz	2972_57	BMP-7	Bone morphogenetic protein 7	BMP7	P18075	ENSG00000101144	655	HGNC:1074
2973_15_CD36_CD36_ANTIGEN.txt.gz	2973_15	CD36 ANTIGEN	Platelet glycoprotein 4	CD36	P16671	ENSG00000135218	948	HGNC:1663
2974_61_CNTN1_contactin_1.txt.gz	2974_61	contactin-1	Contactin-1	CNTN1	Q12860	ENSG00000018236	1272	HGNC:2171
2977_7_EDAR_EDAR.txt.gz	2977_7	EDAR	Tumor necrosis factor receptor superfamily member EDAR	EDAR	Q9UNE0	ENSG00000135960	10913	HGNC:2895
2979_8_CXCL5_ENA_78.txt.gz	2979_8	ENA-78	C-X-C motif chemokine 5	CXCL5	P42830	ENSG00000163735	6374	HGNC:10642
2985_35_CXCL1_Gro_a.txt.gz	2985_35	Gro-a	Growth-regulated alpha protein	CXCL1	P09341	ENSG00000163739	2919	HGNC:4602
2991_9_IL1R1_IL_1_sRI.txt.gz	2991_9	IL-1 sRI	Interleukin-1 receptor type 1	IL1R1	P14778	ENSG00000115594	3554	HGNC:5993
2992_59_IL17RA_IL_17_sR.txt.gz	2992_59	IL-17 sR	Interleukin-17 receptor A	IL17RA	Q96F46	ENSG00000177663	23765	HGNC:5985
2993_1_IL18RAP_IL_18_Rb.txt.gz	2993_1	IL-18 Rb	Interleukin-18 receptor accessory protein	IL18RAP	O95256	ENSG00000115607	8807	HGNC:5989
2994_71_IL1RL2_IL_1Rrp2.txt.gz	2994_71	IL-1Rrp2	Interleukin-1 receptor-like 2	IL1RL2	Q9HB29	ENSG00000115598	8808	HGNC:5999
3000_66_MBL2_MBL.txt.gz	3000_66	MBL	Mannose-binding protein C	MBL2	P11226	ENSG00000165471	4153	HGNC:6922
3004_67_PDCD1LG2_PD_L2.txt.gz	3004_67	PD-L2	Programmed cell death 1 ligand 2	PDCD1LG2	Q9BQ51	ENSG00000197646	80380	HGNC:18731
3007_7_SIGLEC9_Siglec_9.txt.gz	3007_7	Siglec-9	Sialic acid-binding Ig-like lectin 9	SIGLEC9	Q9Y336	ENSG00000129450	27180	HGNC:10878
3009_3_TGFBR3_TGF_b_R_III.txt.gz	3009_3	TGF-b R III	Transforming growth factor beta receptor type 3	TGFBR3	Q03167	ENSG00000069702	7049	HGNC:11774
3024_18_SERPINF2_a2_Antiplasmin.txt.gz	3024_18	a2-Antiplasmin	Alpha-2-antiplasmin	SERPINF2	P08697	ENSG00000276838	5345	HGNC:9075
3025_50_FGF2_bFGF.txt.gz	3025_50	bFGF	Fibroblast growth factor 2	FGF2	P09038	ENSG00000138685	2247	HGNC:3676
3028_36_CCL23_Ck_b_8_1.txt.gz	3028_36	Ck-b-8-1	Ck-beta-8-1	CCL23	P55773	ENSG00000167236	6368	HGNC:10622
3029_52_CD209_DC_SIGN.txt.gz	3029_52	DC-SIGN	CD209 antigen	CD209	Q9NNX6	ENSG00000090659	30835	HGNC:1641
3038_9_CXCL11_I_TAC.txt.gz	3038_9	I-TAC	C-X-C motif chemokine 11	CXCL11	O14625	ENSG00000169248	6373	HGNC:10638
3040_59_CCL3_MIP_1a.txt.gz	3040_59	MIP-1a	C-C motif chemokine 3	CCL3	P10147	ENSG00000006075	6348	HGNC:10627
3041_55_MRC2_MRC2.txt.gz	3041_55	MRC2	C-type mannose receptor 2	MRC2	Q9UBG0	ENSG00000011028	9902	HGNC:16875
3043_49_SPARC_ON.txt.gz	3043_49	ON	SPARC	SPARC	P09486	ENSG00000113140	6678	HGNC:11219
3044_3_CCL18_PARC.txt.gz	3044_3	PARC	C-C motif chemokine 18	CCL18	P55774	ENSG00000006074	6362	HGNC:10616
3045_72_PTN_PTN.txt.gz	3045_72	PTN	Pleiotrophin	PTN	P21246	ENSG00000105894	5764	HGNC:9630
3046_31_RETN_resistin.txt.gz	3046_31	resistin	Resistin	RETN	Q9HD89	ENSG00000104918	56729	HGNC:20389
3049_61_PRSS1_Trypsin.txt.gz	3049_61	Trypsin	Trypsin-1	PRSS1	P07477	ENSG00000274247	5644	HGNC:9475
3050_7_VWF_vWF.txt.gz	3050_7	vWF	von Willebrand factor	VWF	P04275	ENSG00000110799	7450	HGNC:12726
3054_3_HP_Haptoglobin__Mixed_Type.txt.gz	3054_3	Haptoglobin, Mixed Type	Haptoglobin	HP	P00738	ENSG00000197711	3240	HGNC:5141
3059_50_TNFSF13B_BAFF.txt.gz	3059_50	BAFF	Tumor necrosis factor ligand superfamily member 13B	TNFSF13B	Q9Y275	ENSG00000102524	10673	HGNC:11929
3060_43_C9_C9.txt.gz	3060_43	C9	Complement component C9	C9	P02748	ENSG00000113600	735	HGNC:1358
3066_12_LGALS3_Galectin_3.txt.gz	3066_12	Galectin-3	Galectin-3	LGALS3	P17931	ENSG00000131981	3958	HGNC:6563
3074_6_LBP_LBP.txt.gz	3074_6	LBP	Lipopolysaccharide-binding protein	LBP	P18428	ENSG00000129988	3929	HGNC:6517
3077_66_F10_Coagulation_Factor_Xa.txt.gz	3077_66	Coagulation Factor Xa	Coagulation factor Xa	F10	P00742	ENSG00000126218	2159	HGNC:3528
3132_1_VEGFC_VEGF_C.txt.gz	3132_1	VEGF-C	Vascular endothelial growth factor C	VEGFC	P49767	ENSG00000150630	7424	HGNC:12682
3143_3_CD4_sCD4.txt.gz	3143_3	sCD4	T-cell surface glycoprotein CD4	CD4	P01730	ENSG00000010610	920	HGNC:1678
3151_6_IL2RA_IL_2_sRa.txt.gz	3151_6	IL-2 sRa	Interleukin-2 receptor subunit alpha	IL2RA	P01589	ENSG00000134460	3559	HGNC:6008
3152_57_TNFRSF1B_TNF_sR_II.txt.gz	3152_57	TNF sR-II	Tumor necrosis factor receptor superfamily member 1B	TNFRSF1B	P20333	ENSG00000028137	7133	HGNC:11917
3166_92_CD33_Siglec_3.txt.gz	3166_92	Siglec-3	Myeloid cell surface antigen CD33	CD33	P20138	ENSG00000105383	945	HGNC:1659
3168_8_ADAMTS5_ADAMTS_5.txt.gz	3168_8	ADAMTS-5	A disintegrin and metalloproteinase with thrombospondin motifs 5	ADAMTS5	Q9UNA0	ENSG00000154736	11096	HGNC:221
3171_57_APP_amyloid_precursor_protein.txt.gz	3171_57	amyloid precursor protein	Amyloid beta A4 protein	APP	P05067	ENSG00000142192	351	HGNC:620
3173_49_NAAA_ASAHL.txt.gz	3173_49	ASAHL	N-acylethanolamine-hydrolyzing acid amidase	NAAA	Q02083	ENSG00000138744	27163	HGNC:736
3175_51_ADAMTS13_ATS13.txt.gz	3175_51	ATS13	A disintegrin and metalloproteinase with thrombospondin motifs 13	ADAMTS13	Q76LX8	ENSG00000160323	11093	HGNC:1366
3181_50_CTSS_Cathepsin_S.txt.gz	3181_50	Cathepsin S	Cathepsin S	CTSS	P25774	ENSG00000163131	1520	HGNC:2545
3184_25_F7_Coagulation_Factor_VII.txt.gz	3184_25	Coagulation Factor VII	Coagulation factor VII	F7	P08709	ENSG00000057593	2155	HGNC:3544
3191_50_WFIKKN1_WFKN1.txt.gz	3191_50	WFKN1	WAP, kazal, immunoglobulin, kunitz and NTR domain-containing protein 1	WFIKKN1	Q96NZ8	ENSG00000127578	117166	HGNC:30912
3195_50_GNLY_Granulysin.txt.gz	3195_50	Granulysin	Granulysin	GNLY	P22749	ENSG00000115523	10578	HGNC:4414
3196_6_HAPLN1_HPLN1.txt.gz	3196_6	HPLN1	Hyaluronan and proteoglycan link protein 1	HAPLN1	P10915	ENSG00000145681	1404	HGNC:2380
3199_54_KLK12_kallikrein_12.txt.gz	3199_54	kallikrein 12	Kallikrein-12	KLK12	Q9UKR0	ENSG00000186474	43849	HGNC:6360
3210_1_METAP1_METAP1.txt.gz	3210_1	METAP1	Methionine aminopeptidase 1	METAP1	P53582	ENSG00000164024	23173	HGNC:15789
3213_65_NID1_Nidogen.txt.gz	3213_65	Nidogen	Nidogen-1	NID1	P14543	ENSG00000116962	4811	HGNC:7821
3216_2_PIGR_PIGR.txt.gz	3216_2	PIGR	Polymeric immunoglobulin receptor	PIGR	P01833	ENSG00000162896	5284	HGNC:8968
3220_40_RET_RET.txt.gz	3220_40	RET	Proto-oncogene tyrosine-protein kinase receptor Ret	RET	P07949	ENSG00000165731	5979	HGNC:9967
3221_54_SFRP1_SARP_2.txt.gz	3221_54	SARP-2	Secreted frizzled-related protein 1	SFRP1	Q8N474	ENSG00000104332	6422	HGNC:10776
3232_28_ACP5_TrATPase.txt.gz	3232_28	TrATPase	Tartrate-resistant acid phosphatase type 5	ACP5	P13686	ENSG00000102575	54	HGNC:124
3234_23_CCDC80_URB.txt.gz	3234_23	URB	Coiled-coil domain-containing protein 80	CCDC80	Q76M96	ENSG00000091986	151887	HGNC:30649
3235_50_WFIKKN2_WFKN2.txt.gz	3235_50	WFKN2	WAP, Kazal, immunoglobulin, Kunitz and NTR domain-containing protein 2	WFIKKN2	Q8TEU8	ENSG00000173714	124857	HGNC:30916
3280_49_ACAN_Aggrecan.txt.gz	3280_49	Aggrecan	Aggrecan core protein	ACAN	P16112	ENSG00000157766	176	HGNC:319
3283_21_TGFBI_BGH3.txt.gz	3283_21	BGH3	Transforming growth factor-beta-induced protein ig-h3	TGFBI	Q15582	ENSG00000120708	7045	HGNC:11771
3285_23_C1R_C1r.txt.gz	3285_23	C1r	Complement C1r subcomponent	C1R	P00736	ENSG00000159403	715	HGNC:1246
3290_50_CD109_CD109.txt.gz	3290_50	CD109	CD109 antigen	CD109	Q6YHK3	ENSG00000156535	135228	HGNC:21685
3291_30_FCER2_CD23.txt.gz	3291_30	CD23	Low affinity immunoglobulin epsilon Fc receptor	FCER2	P06734	ENSG00000104921	2208	HGNC:3612
3292_75_CD48_CD48.txt.gz	3292_75	CD48	CD48 antigen	CD48	P09326	ENSG00000117091	962	HGNC:1683
3293_2_CD5L_CD5L.txt.gz	3293_2	CD5L	CD5 antigen-like	CD5L	O43866	ENSG00000073754	922	HGNC:1690
3296_92_CNTN2_CNTN2.txt.gz	3296_92	CNTN2	Contactin-2	CNTN2	Q02246	ENSG00000184144	6900	HGNC:2172
3298_52_CNTN4_Contactin_4.txt.gz	3298_52	Contactin-4	Contactin-4	CNTN4	Q8IWV2	ENSG00000144619	152330	HGNC:2174
3302_58_CST7_CYTF.txt.gz	3302_58	CYTF	Cystatin-F	CST7	O76096	ENSG00000077984	8530	HGNC:2479
3305_6_DLL4_DLL4.txt.gz	3305_6	DLL4	Delta-like protein 4	DLL4	Q9NR61	ENSG00000128917	54567	HGNC:2910
3309_2_FCGR2A_FCG2A.txt.gz	3309_2	FCG2A	Low affinity immunoglobulin gamma Fc region receptor II-a	FCGR2A	P12318	ENSG00000143226	2212	HGNC:3616
3310_62_FCGR2B_FCG2B.txt.gz	3310_62	FCG2B	Low affinity immunoglobulin gamma Fc region receptor II-b	FCGR2B	P31994	ENSG00000072694	2213	HGNC:3618
3311_27_FCGR3B_FCG3B.txt.gz	3311_27	FCG3B	Low affinity immunoglobulin gamma Fc region receptor III-B	FCGR3B	O75015	ENSG00000162747	2215	HGNC:3620
3313_21_FCN2_FCN2.txt.gz	3313_21	FCN2	Ficolin-2	FCN2	Q15485	ENSG00000160339	2220	HGNC:3624
3316_58_SERPIND1_Heparin_cofactor_II.txt.gz	3316_58	Heparin cofactor II	Heparin cofactor 2	SERPIND1	P05546	ENSG00000099937	3053	HGNC:4838
3320_49_IGFBP7_IGFBP_7.txt.gz	3320_49	IGFBP-7	Insulin-like growth factor-binding protein 7	IGFBP7	Q16270	ENSG00000163453	3490	HGNC:5476
3322_52_LRIG3_LRIG3.txt.gz	3322_52	LRIG3	Leucine-rich repeats and immunoglobulin-like domains protein 3	LRIG3	Q6UXM1	ENSG00000139263	121227	HGNC:30991
3323_37_LRP8_LRP8.txt.gz	3323_37	LRP8	Low-density lipoprotein receptor-related protein 8	LRP8	Q14114	ENSG00000157193	7804	HGNC:6700
3324_51_LY9_LY9.txt.gz	3324_51	LY9	T-lymphocyte surface antigen Ly-9	LY9	Q9HBG7	ENSG00000122224	4063	HGNC:6730
3325_2_MATN2_MATN2.txt.gz	3325_2	MATN2	Matrilin-2	MATN2	O00339	ENSG00000132561	4147	HGNC:6908
3327_27_NTN4_NET4.txt.gz	3327_27	NET4	Netrin-4	NTN4	Q9HB63	ENSG00000074527	59277	HGNC:13658
3329_14_PGLYRP1_PGRP_S.txt.gz	3329_14	PGRP-S	Peptidoglycan recognition protein 1	PGLYRP1	O75594	ENSG00000008438	8993	HGNC:8904
3336_50_TFPI_TFPI.txt.gz	3336_50	TFPI	Tissue factor pathway inhibitor	TFPI	P10646	ENSG00000003436	7035	HGNC:11760
3339_33_THBS2_TSP2.txt.gz	3339_33	TSP2	Thrombospondin-2	THBS2	P35442	ENSG00000186340	7058	HGNC:11786
3340_53_THBS4_TSP4.txt.gz	3340_53	TSP4	Thrombospondin-4	THBS4	P35443	ENSG00000113296	7060	HGNC:11788
3344_60_SERPINC1_Antithrombin_III.txt.gz	3344_60	Antithrombin III	Antithrombin-III	SERPINC1	P01008	ENSG00000117601	462	HGNC:775
3348_49_BMP1_BMP_1.txt.gz	3348_49	BMP-1	Bone morphogenetic protein 1	BMP1	P13497	ENSG00000168487	649	HGNC:1067
3352_80_CA6_Carbonic_anhydrase_6.txt.gz	3352_80	Carbonic anhydrase 6	Carbonic anhydrase 6	CA6	P23280	ENSG00000131686	765	HGNC:1380
3363_31_CSK_CSK.txt.gz	3363_31	CSK	Tyrosine-protein kinase CSK	CSK	P41240	ENSG00000103653	1445	HGNC:2444
3364_76_CTSV_Cathepsin_V.txt.gz	3364_76	Cathepsin V	Cathepsin L2	CTSV	O60911	ENSG00000136943	1515	HGNC:2538
3366_51_ECM1_ECM1.txt.gz	3366_51	ECM1	Extracellular matrix protein 1	ECM1	Q16610	ENSG00000143369	1893	HGNC:3153
3378_49_KLK7_Kallikrein_7.txt.gz	3378_49	Kallikrein 7	Kallikrein-7	KLK7	P49862	ENSG00000169035	5650	HGNC:6368
3389_7_SERPINA5_PCI.txt.gz	3389_7	PCI	Plasma serine protease inhibitor	SERPINA5	P05154	ENSG00000188488	5104	HGNC:8723
3391_10_PIK3CG_PK3CG.txt.gz	3391_10	PK3CG	Phosphatidylinositol 4,5-bisphosphate 3-kinase catalytic subunit gamma isoform	PIK3CG	P48736	ENSG00000105851	5294	HGNC:8978
3396_54_REN_Renin.txt.gz	3396_54	Renin	Renin	REN	P00797	ENSG00000143839	5972	HGNC:9958
3415_61_IBSP_BSP.txt.gz	3415_61	BSP	Bone sialoprotein 2	IBSP	P21815	ENSG00000029559	3381	HGNC:5341
3419_49_CAMK2D_CAMK2D.txt.gz	3419_49	CAMK2D	Calcium/calmodulin-dependent protein kinase type II subunit delta	CAMK2D	Q13557	ENSG00000145349	817	HGNC:1462
3420_21_CA13_Carbonic_anhydrase_XIII.txt.gz	3420_21	Carbonic anhydrase XIII	Carbonic anhydrase 13	CA13	Q8N1Q1	ENSG00000185015	377677	HGNC:14914
3421_54_TNFSF8_CD30_Ligand.txt.gz	3421_54	CD30 Ligand	Tumor necrosis factor ligand superfamily member 8	TNFSF8	P32971	ENSG00000106952	944	HGNC:11938
3431_54_EPHA1_EphA1.txt.gz	3431_54	EphA1	Ephrin type-A receptor 1	EPHA1	P21709	ENSG00000146904	2041	HGNC:3385
3434_34_FN1_FN1_3.txt.gz	3434_34	FN1.3	Fibronectin Fragment 3	FN1	P02751	ENSG00000115414	2335	HGNC:3778
3435_53_FN1_FN1_4.txt.gz	3435_53	FN1.4	Fibronectin Fragment 4	FN1	P02751	ENSG00000115414	2335	HGNC:3778
3438_10_FSTL3_FSTL3.txt.gz	3438_10	FSTL3	Follistatin-related protein 3	FSTL3	O95633	ENSG00000070404	10272	HGNC:3973
3440_7_GZMA_granzyme_A.txt.gz	3440_7	granzyme A	Granzyme A	GZMA	P12544	ENSG00000145649	3001	HGNC:4708
3445_53_IL15RA_IL_15_Ra.txt.gz	3445_53	IL-15 Ra	Interleukin-15 receptor subunit alpha	IL15RA	Q13261	ENSG00000134470	3601	HGNC:5978
3448_13_INSR_IR.txt.gz	3448_13	IR	Insulin receptor	INSR	P06213	ENSG00000171105	3643	HGNC:6091
3449_58_SERPINA4_Kallistatin.txt.gz	3449_58	Kallistatin	Kallistatin	SERPINA4	P29622	ENSG00000100665	5267	HGNC:8948
3457_57_POSTN_Periostin.txt.gz	3457_57	Periostin	Periostin	POSTN	Q15063	ENSG00000133110	10631	HGNC:16953
3459_49_PDGFRB_PDGF_Rb.txt.gz	3459_49	PDGF Rb	Platelet-derived growth factor receptor beta	PDGFRB	P09619	ENSG00000113721	5159	HGNC:8804
3461_58_BCAN_PGCB.txt.gz	3461_58	PGCB	Brevican core protein	BCAN	Q96GW7	ENSG00000132692	63827	HGNC:23059
3470_1_SELE_sE_Selectin.txt.gz	3470_1	sE-Selectin	E-selectin	SELE	P16581	ENSG00000007908	6401	HGNC:10718
3474_19_THBS1_Thrombospondin_1.txt.gz	3474_19	Thrombospondin-1	Thrombospondin-1	THBS1	P07996	ENSG00000137801	7057	HGNC:11785
3484_60_AGT_Angiotensinogen.txt.gz	3484_60	Angiotensinogen	Angiotensinogen	AGT	P01019	ENSG00000135744	183	HGNC:333
3488_64_CAT_Catalase.txt.gz	3488_64	Catalase	Catalase	CAT	P04040	ENSG00000121691	847	HGNC:1516
3495_15_CXCL6_GCP_2.txt.gz	3495_15	GCP-2	C-X-C motif chemokine 6	CXCL6	P80162	ENSG00000124875	6372	HGNC:10643
3499_77_IL17B_IL_17B.txt.gz	3499_77	IL-17B	Interleukin-17B	IL17B	Q9UHF5	ENSG00000127743	27190	HGNC:5982
3508_78_CCL22_MDC.txt.gz	3508_78	MDC	C-C motif chemokine 22	CCL22	O00626	ENSG00000102962	6367	HGNC:10621
3516_60_CXCL12_SDF_1.txt.gz	3516_60	SDF-1	Stromal cell-derived factor 1	CXCL12	P48061	ENSG00000107562	6387	HGNC:10672
3518_54_CPB2_TAFI.txt.gz	3518_54	TAFI	Carboxypeptidase B2	CPB2	Q96IY4	ENSG00000080618	1361	HGNC:2300
3519_3_CCL17_TARC.txt.gz	3519_3	TARC	C-C motif chemokine 17	CCL17	Q92583	ENSG00000102970	6361	HGNC:10615
3535_84_DKK1_DKK1.txt.gz	3535_84	DKK1	Dickkopf-related protein 1	DKK1	O94907	ENSG00000107984	22943	HGNC:2891
3554_24_ADIPOQ_Adiponectin.txt.gz	3554_24	Adiponectin	Adiponectin	ADIPOQ	Q15848	ENSG00000181092	9370	HGNC:13633
3580_25_SERPINA1_a1_Antitrypsin.txt.gz	3580_25	a1-Antitrypsin	Alpha-1-antitrypsin	SERPINA1	P01009	ENSG00000197249	5265	HGNC:8941
3581_53_AHSG_a2_HS_Glycoprotein.txt.gz	3581_53	a2-HS-Glycoprotein	Alpha-2-HS-glycoprotein	AHSG	P02765	ENSG00000145192	197	HGNC:349
3583_54_ARSA_Arylsulfatase_A.txt.gz	3583_54	Arylsulfatase A	Arylsulfatase A	ARSA	P15289	ENSG00000100299	410	HGNC:713
3593_72_CASP3_Caspase_3.txt.gz	3593_72	Caspase-3	Caspase-3	CASP3	P42574	ENSG00000164305	836	HGNC:1504
3600_2_CHIT1_Chitotriosidase_1.txt.gz	3600_2	Chitotriosidase-1	Chitotriosidase-1	CHIT1	Q13231	ENSG00000133063	1118	HGNC:1936
3605_77_MASP1_MASP3.txt.gz	3605_77	MASP3	Mannan-binding lectin serine protease 1	MASP1	P48740	ENSG00000127241	5648	HGNC:6901
3607_71_DKK3_DKK3.txt.gz	3607_71	DKK3	Dickkopf-related protein 3	DKK3	Q9UBP4	ENSG00000050165	27122	HGNC:2893
3616_3_GNS_GNS.txt.gz	3616_3	GNS	N-acetylglucosamine-6-sulfatase	GNS	P15586	ENSG00000135677	2799	HGNC:4422
3617_80_HGFAC_HGFA.txt.gz	3617_80	HGFA	Hepatocyte growth factor activator	HGFAC	Q04756	ENSG00000109758	3083	HGNC:4894
3622_33_LGMN_LGMN.txt.gz	3622_33	LGMN	Legumain	LGMN	Q99538	ENSG00000100600	5641	HGNC:9472
3640_14_LRPAP1_RAP.txt.gz	3640_14	RAP	alpha-2-macroglobulin receptor-associated protein	LRPAP1	P30533	ENSG00000163956	4043	HGNC:6701
3651_50_KDR_VEGF_sR2.txt.gz	3651_50	VEGF sR2	Vascular endothelial growth factor receptor 2	KDR	P35968	ENSG00000128052	3791	HGNC:6307
3710_49_PLG_Angiostatin.txt.gz	3710_49	Angiostatin	Angiostatin	PLG	P00747	ENSG00000122194	5340	HGNC:9071
3727_35_PYY_PYY.txt.gz	3727_35	PYY	Peptide YY	PYY	P10082	ENSG00000131096	5697	HGNC:9748
3773_15_TEK_sTie_2.txt.gz	3773_15	sTie-2	Angiopoietin-1 receptor, soluble	TEK	Q02763	ENSG00000120156	7010	HGNC:11724
3795_6_ADAM9_ADAM_9.txt.gz	3795_6	ADAM 9	Disintegrin and metalloproteinase domain-containing protein 9	ADAM9	Q13443	ENSG00000168615	8754	HGNC:216
3796_79_ANGPTL4_ANGL4.txt.gz	3796_79	ANGL4	Angiopoietin-related protein 4	ANGPTL4	Q9BY76	ENSG00000167772	51129	HGNC:16039
3799_11_CA3_Carbonic_anhydrase_III.txt.gz	3799_11	Carbonic anhydrase III	Carbonic anhydrase 3	CA3	P07451	ENSG00000164879	761	HGNC:1374
3803_10_CST5_CYTD.txt.gz	3803_10	CYTD	Cystatin-D	CST5	P28325	ENSG00000170367	1473	HGNC:2477
3805_16_ESM1_Endocan.txt.gz	3805_16	Endocan	Endothelial cell-specific molecule 1	ESM1	Q9NQ30	ENSG00000164283	11082	HGNC:3466
3806_55_EPHA5_EphA5.txt.gz	3806_55	EphA5	Ephrin type-A receptor 5	EPHA5	P54756	ENSG00000145242	2044	HGNC:3389
3807_1_FGF23_FGF23.txt.gz	3807_1	FGF23	Fibroblast growth factor 23	FGF23	Q9GZV9	ENSG00000118972	8074	HGNC:3680
3810_50_FGR_FGR.txt.gz	3810_50	FGR	Tyrosine-protein kinase Fgr	FGR	P09769	ENSG00000000938	2268	HGNC:3697
3820_68_MAPKAPK2_MAPK2.txt.gz	3820_68	MAPK2	MAP kinase-activated protein kinase 2	MAPKAPK2	P49137	ENSG00000162889	9261	HGNC:6887
3825_18_MAPK8_MK08.txt.gz	3825_18	MK08	Mitogen-activated protein kinase 8	MAPK8	P45983	ENSG00000107643	5599	HGNC:6881
3835_11_TLR2_TLR2.txt.gz	3835_11	TLR2	Toll-like receptor 2	TLR2	O60603	ENSG00000137462	7097	HGNC:11848
3848_14_GAPDH_GAPDH__liver.txt.gz	3848_14	GAPDH, liver	Glyceraldehyde-3-phosphate dehydrogenase	GAPDH	P04406	ENSG00000111640	2597	HGNC:4141
3858_5_ACP1_PPAC.txt.gz	3858_5	PPAC	Low molecular weight phosphotyrosine protein phosphatase	ACP1	P24666	ENSG00000143727	52	HGNC:122
3890_8_LDHB_LDH_H_1.txt.gz	3890_8	LDH-H 1	L-lactate dehydrogenase B chain	LDHB	P07195	ENSG00000111716	3945	HGNC:6541
3905_62_UBE2N_UBE2N.txt.gz	3905_62	UBE2N	Ubiquitin-conjugating enzyme E2 N	UBE2N	P61088	ENSG00000177889	7334	HGNC:12492
4126_22_BPI_BPI.txt.gz	4126_22	BPI	Bactericidal permeability-increasing protein	BPI	P17213	ENSG00000101425	671	HGNC:1095
4127_75_C6_C6.txt.gz	4127_75	C6	Complement component C6	C6	P13671	ENSG00000039537	729	HGNC:1339
4131_72_FN1_Fibronectin.txt.gz	4131_72	Fibronectin	Fibronectin	FN1	P02751	ENSG00000115414	2335	HGNC:3778
4133_54_GZMB_Granzyme_B.txt.gz	4133_54	Granzyme B	Granzyme B	GZMB	P10144	ENSG00000100453	3002	HGNC:4709
4141_79_CXCL10_IP_10.txt.gz	4141_79	IP-10	C-X-C motif chemokine 10	CXCL10	P02778	ENSG00000169245	3627	HGNC:10637
4145_58_NTF3_Neurotrophin_3.txt.gz	4145_58	Neurotrophin-3	Neurotrophin-3	NTF3	P20783	ENSG00000185652	4908	HGNC:8023
4151_6_PLG_Plasminogen.txt.gz	4151_6	Plasminogen	Plasminogen	PLG	P00747	ENSG00000122194	5340	HGNC:9071
4152_58_KLKB1_Prekallikrein.txt.gz	4152_58	Prekallikrein	Plasma kallikrein	KLKB1	P03952	ENSG00000164344	3818	HGNC:6371
4153_11_SERPINA3_alpha_1_antichymotrypsin_complex.txt.gz	4153_11	alpha-1-antichymotrypsin complex	Alpha-1-antichymotrypsin complex	SERPINA3	P01011	NA	12	HGNC:16
4154_57_SELP_P_Selectin.txt.gz	4154_57	P-Selectin	P-selectin	SELP	P16109	ENSG00000174175	6403	HGNC:10721
4155_3_TNC_Tenascin.txt.gz	4155_3	Tenascin	Tenascin	TNC	P24821	ENSG00000041982	3371	HGNC:5318
4157_2_F2_Thrombin.txt.gz	4157_2	Thrombin	Thrombin	F2	P00734	ENSG00000180210	2147	HGNC:3535
4158_54_PLAU_uPA.txt.gz	4158_54	uPA	Urokinase-type plasminogen activator	PLAU	P00749	ENSG00000122861	5328	HGNC:9052
4159_130_CFH_Factor_H.txt.gz	4159_130	Factor H	Complement factor H	CFH	P08603	ENSG00000000971	3075	HGNC:4883
4160_49_MMP2_MMP_2.txt.gz	4160_49	MMP-2	72 kDa type IV collagenase	MMP2	P08253	ENSG00000087245	4313	HGNC:7166
4162_54_TF_Transferrin.txt.gz	4162_54	Transferrin	Serotransferrin	TF	P02787	ENSG00000091513	7018	HGNC:11740
4187_49_PGD_6_Phosphogluconate_dehydrogenase.txt.gz	4187_49	6-Phosphogluconate dehydrogenase	6-phosphogluconate dehydrogenase, decarboxylating	PGD	P52209	ENSG00000142657	5226	HGNC:8891
4192_10_AKR1A1_AK1A1.txt.gz	4192_10	AK1A1	Alcohol dehydrogenase [NADP(+)]	AKR1A1	P14550	ENSG00000117448	10327	HGNC:380
4220_39_FER_FER.txt.gz	4220_39	FER	Tyrosine-protein kinase Fer	FER	P16591	ENSG00000151422	2241	HGNC:3655
4232_19_IGF1R_IGF_I_sR.txt.gz	4232_19	IGF-I sR	Insulin-like growth factor 1 receptor	IGF1R	P08069	ENSG00000140443	3480	HGNC:5465
4234_8_IL1RL1_IL_1_R4.txt.gz	4234_8	IL-1 R4	Interleukin-1 receptor-like 1	IL1RL1	Q01638	ENSG00000115602	9173	HGNC:5998
4278_14_P4HB_Protein_disulfide_isomerase.txt.gz	4278_14	Protein disulfide-isomerase	Protein disulfide-isomerase	P4HB	P07237	ENSG00000185624	5034	HGNC:8548
4294_16_SPHK1_Sphingosine_kinase_1.txt.gz	4294_16	Sphingosine kinase 1	Sphingosine kinase 1	SPHK1	Q9NYA1	ENSG00000176170	8877	HGNC:11240
4324_33_CST2_CYTT.txt.gz	4324_33	CYTT	Cystatin-SA	CST2	P09228	ENSG00000170369	1470	HGNC:2474
4328_2_BOC_BOC.txt.gz	4328_2	BOC	Brother of CDO	BOC	Q9BWV1	ENSG00000144857	91653	HGNC:17173
4337_49_CRP_CRP.txt.gz	4337_49	CRP	C-reactive protein	CRP	P02741	ENSG00000132693	1401	HGNC:2367
4342_10_ICAM1_sICAM_1.txt.gz	4342_10	sICAM-1	Intercellular adhesion molecule 1	ICAM1	P05362	ENSG00000090339	3383	HGNC:5344
4355_13_DAPK2_DAPK2.txt.gz	4355_13	DAPK2	Death-associated protein kinase 2	DAPK2	Q9UIK4	ENSG00000035664	23604	HGNC:2675
4374_45_GDF15_MIC_1.txt.gz	4374_45	MIC-1	Growth/differentiation factor 15	GDF15	Q99988	ENSG00000130513	9518	HGNC:30142
4407_10_MST1_MSP.txt.gz	4407_10	MSP	Hepatocyte growth factor-like protein	MST1	P26927	ENSG00000173531	4485	HGNC:7380
4413_3_SLPI_SLPI.txt.gz	4413_3	SLPI	Antileukoproteinase	SLPI	P03973	ENSG00000124107	6590	HGNC:11092
4435_66_ENPP7_ENPP7.txt.gz	4435_66	ENPP7	Ectonucleotide pyrophosphatase/phosphodiesterase family member 7	ENPP7	Q6UWV6	ENSG00000182156	339221	HGNC:23764
4440_15_FCRL3_FCRL3.txt.gz	4440_15	FCRL3	Fc receptor-like protein 3	FCRL3	Q96P31	ENSG00000160856	115352	HGNC:18506
4455_89_MFGE8_MFGM.txt.gz	4455_89	MFGM	Lactadherin	MFGE8	Q08431	ENSG00000140545	4240	HGNC:7036
4459_68_PCSK7_PCSK7.txt.gz	4459_68	PCSK7	Proprotein convertase subtilisin/kexin type 7	PCSK7	Q16549	ENSG00000160613	9159	HGNC:8748
4464_10_SIGLEC1_Sialoadhesin.txt.gz	4464_10	Sialoadhesin	Sialoadhesin	SIGLEC1	Q9BZZ2	ENSG00000088827	6614	HGNC:11127
4467_49_SPARCL1_SPARCL1.txt.gz	4467_49	SPARCL1	SPARC-like protein 1	SPARCL1	Q14515	ENSG00000152583	8404	HGNC:11220
4471_50_TGM3_TGM3.txt.gz	4471_50	TGM3	Protein-glutamine gamma-glutamyltransferase E	TGM3	Q08188	ENSG00000125780	7053	HGNC:11779
4479_14_SERPING1_C1_Esterase_Inhibitor.txt.gz	4479_14	C1-Esterase Inhibitor	Plasma protease C1 inhibitor	SERPING1	P05155	ENSG00000149131	710	HGNC:1228
4480_59_C3_C3b.txt.gz	4480_59	C3b	Complement C3b	C3	P01024	ENSG00000125730	718	HGNC:1318
4498_62_NCAM1_NCAM_120.txt.gz	4498_62	NCAM-120	Neural cell adhesion molecule 1, 120 kDa isoform	NCAM1	P13591	ENSG00000149294	4684	HGNC:7656
4499_21_PDGFA_PDGF_AA.txt.gz	4499_21	PDGF-AA	Platelet-derived growth factor subunit A	PDGFA	P04085	ENSG00000197461	5154	HGNC:8799
4500_50_CLEC11A_SCGF_alpha.txt.gz	4500_50	SCGF-alpha	Stem cell growth factor-alpha	CLEC11A	Q9Y240	ENSG00000105472	6320	HGNC:10576
4534_10_PRSS22_BSSP4.txt.gz	4534_10	BSSP4	Brain-specific serine protease 4	PRSS22	Q9GZN4	ENSG00000005001	64063	HGNC:14368
4535_50_BST1_BST1.txt.gz	4535_50	BST1	ADP-ribosyl cyclase/cyclic ADP-ribose hydrolase 2	BST1	Q10588	ENSG00000109743	683	HGNC:1118
4559_64_KYNU_KYNU.txt.gz	4559_64	KYNU	Kynureninase	KYNU	Q16719	ENSG00000115919	8942	HGNC:6469
4564_2_PLXNC1_PLXC1.txt.gz	4564_2	PLXC1	Plexin-C1	PLXNC1	O60486	ENSG00000136040	10154	HGNC:9106
4721_54_TFF3_TFF3.txt.gz	4721_54	TFF3	Trefoil factor 3	TFF3	Q07654	ENSG00000160180	7033	HGNC:11757
4763_31_AFM_Afamin.txt.gz	4763_31	Afamin	Afamin	AFM	P43652	ENSG00000079557	173	HGNC:316
4771_10_SMPDL3A_ASM3A.txt.gz	4771_10	ASM3A	Acid sphingomyelinase-like phosphodiesterase 3a	SMPDL3A	Q92484	ENSG00000172594	10924	HGNC:17389
4775_34_GSN_Gelsolin.txt.gz	4775_34	Gelsolin	Gelsolin	GSN	P06396	ENSG00000148180	2934	HGNC:4620
4801_13_LPO_PERL.txt.gz	4801_13	PERL	Lactoperoxidase	LPO	P22079	ENSG00000167419	4025	HGNC:6678
4811_33_ITIH4_ITI_heavy_chain_H4.txt.gz	4811_33	ITI heavy chain H4	Inter-alpha-trypsin inhibitor heavy chain H4	ITIH4	Q14624	ENSG00000055955	3700	HGNC:6169
4831_4_SELL_sL_Selectin.txt.gz	4831_4	sL-Selectin	L-Selectin	SELL	P14151	ENSG00000188404	6402	HGNC:10720
4834_61_EPHA2_Epithelial_cell_kinase.txt.gz	4834_61	Epithelial cell kinase	Ephrin type-A receptor 2	EPHA2	P29317	ENSG00000142627	1969	HGNC:3386
4866_59_NTRK2_TrkB.txt.gz	4866_59	TrkB	BDNF/NT-3 growth factors receptor	NTRK2	Q16620	ENSG00000148053	4915	HGNC:8032
4867_15_VEGFA_VEGF121.txt.gz	4867_15	VEGF121	Vascular endothelial growth factor A, isoform 121	VEGFA	P15692	ENSG00000112715	7422	HGNC:12680
4874_3_ANG_Angiogenin.txt.gz	4874_3	Angiogenin	Angiogenin	ANG	P03950	ENSG00000214274	283	HGNC:483
4878_3_F10_Coagulation_Factor_X.txt.gz	4878_3	Coagulation Factor X	Coagulation Factor X	F10	P00742	ENSG00000126218	2159	HGNC:3528
4886_3_CCL7_MCP_3.txt.gz	4886_3	MCP-3	C-C motif chemokine 7	CCL7	P80098	ENSG00000108688	6354	HGNC:10634
4900_8_C3_C3a.txt.gz	4900_8	C3a	C3a anaphylatoxin	C3	P01024	ENSG00000125730	718	HGNC:1318
4906_35_F5_Coagulation_Factor_V.txt.gz	4906_35	Coagulation Factor V	Coagulation Factor V	F5	P12259	ENSG00000198734	2153	HGNC:3542
4908_6_ENG_Endoglin.txt.gz	4908_6	Endoglin	Endoglin	ENG	P17813	ENSG00000106991	2022	HGNC:3349
4911_49_GSTP1_Glutathione_S_transferase_Pi.txt.gz	4911_49	Glutathione S-transferase Pi	Glutathione S-transferase P	GSTP1	P09211	ENSG00000084207	2950	HGNC:4638
4913_78_CCL16_HCC_4.txt.gz	4913_78	HCC-4	C-C motif chemokine 16	CCL16	O15467	ENSG00000161573	6360	HGNC:10614
4920_10_LYZ_Lysozyme.txt.gz	4920_10	Lysozyme	Lysozyme C	LYZ	P61626	ENSG00000090382	4069	HGNC:6740
4922_13_CCL19_MIP_3b.txt.gz	4922_13	MIP-3b	C-C motif chemokine 19	CCL19	Q99731	ENSG00000172724	6363	HGNC:10617
4924_32_MMP1_MMP_1.txt.gz	4924_32	MMP-1	Interstitial collagenase	MMP1	P03956	ENSG00000196611	4312	HGNC:7155
4925_54_MMP13_MMP_13.txt.gz	4925_54	MMP-13	Collagenase 3	MMP13	P45452	ENSG00000137745	4322	HGNC:7159
4929_55_SHBG_SHBG.txt.gz	4929_55	SHBG	Sex hormone-binding globulin	SHBG	P04278	ENSG00000129214	6462	HGNC:10839
4930_21_STC1_Stanniocalcin_1.txt.gz	4930_21	Stanniocalcin-1	Stanniocalcin-1	STC1	P52823	ENSG00000159167	6781	HGNC:11373
4960_72_ANXA1_annexin_I.txt.gz	4960_72	annexin I	Annexin A1	ANXA1	P04083	ENSG00000135046	301	HGNC:533
4961_17_ANXA2_annexin_II.txt.gz	4961_17	annexin II	Annexin A2	ANXA2	P07355	ENSG00000182718	302	HGNC:537
4962_52_CDNF_ARMEL.txt.gz	4962_52	ARMEL	Cerebral dopamine neurotrophic factor	CDNF	Q49AH0	ENSG00000185267	441549	HGNC:24913
4964_67_ERAP1_ARTS1.txt.gz	4964_67	ARTS1	Endoplasmic reticulum aminopeptidase 1	ERAP1	Q9NZ08	ENSG00000164307	51752	HGNC:18173
4969_2_CA1_Carbonic_anhydrase_I.txt.gz	4969_2	Carbonic anhydrase I	Carbonic anhydrase 1	CA1	P00915	ENSG00000133742	759	HGNC:1368
4971_1_CTSZ_CATZ.txt.gz	4971_1	CATZ	Cathepsin Z	CTSZ	Q9UBR2	ENSG00000101160	1522	HGNC:2547
4979_34_DPT_DERM.txt.gz	4979_34	DERM	Dermatopontin	DPT	Q07507	ENSG00000143196	1805	HGNC:3011
4982_54_PI3_Elafin.txt.gz	4982_54	Elafin	Elafin	PI3	P19957	ENSG00000124102	5266	HGNC:8947
4989_7_FGG_Fibrinogen_g_chain_dimer.txt.gz	4989_7	Fibrinogen g-chain dimer	Fibrinogen gamma chain	FGG	P02679	ENSG00000171557	2266	HGNC:3694
4990_87_GP1BA_GP1BA.txt.gz	4990_87	GP1BA	Platelet glycoprotein Ib alpha chain	GP1BA	P07359	ENSG00000185245	2811	HGNC:4439
4991_12_GPC5_GPC5.txt.gz	4991_12	GPC5	Glypican-5	GPC5	P78333	ENSG00000179399	2262	HGNC:4453
4992_49_GRN_GRN.txt.gz	4992_49	GRN	Granulins	GRN	P28799	ENSG00000030582	2896	HGNC:4601
4996_66_HRG_HRG.txt.gz	4996_66	HRG	Histidine-rich glycoprotein	HRG	P04196	ENSG00000113905	3273	HGNC:5181
5000_52_LGALS3BP_LG3BP.txt.gz	5000_52	LG3BP	Galectin-3-binding protein	LGALS3BP	Q08380	ENSG00000108679	3959	HGNC:6564
5005_4_MAPK12_MK12.txt.gz	5005_4	MK12	Mitogen-activated protein kinase 12	MAPK12	P53778	ENSG00000188130	6300	HGNC:6874
5006_71_MAPK13_MK13.txt.gz	5006_71	MK13	Mitogen-activated protein kinase 13	MAPK13	O15264	ENSG00000156711	5603	HGNC:6875
5015_15_PLA2G7_PAFAH.txt.gz	5015_15	PAFAH	Platelet-activating factor acetylhydrolase	PLA2G7	Q13093	ENSG00000146070	7941	HGNC:9040
5029_3_FAP_SEPR.txt.gz	5029_3	SEPR	Prolyl endopeptidase FAP	FAP	Q12884	ENSG00000078098	2191	HGNC:3590
5036_50_TNFAIP6_TSG_6.txt.gz	5036_50	TSG-6	Tumor necrosis factor-inducible gene 6 protein	TNFAIP6	P98066	ENSG00000123610	7130	HGNC:11898
5060_62_CD274_B7_H1.txt.gz	5060_62	B7-H1	Programmed cell death 1 ligand 1	CD274	Q9NZQ7	ENSG00000120217	29126	HGNC:17635
5061_27_ICOSLG_B7_H2.txt.gz	5061_27	B7-H2	ICOS ligand	ICOSLG	O75144	ENSG00000160223	23308	HGNC:17087
5063_12_CD244_CD244.txt.gz	5063_12	CD244	Natural killer cell receptor 2B4	CD244	Q9BZW8	ENSG00000122223	51744	HGNC:18171
5066_134_CD300C_CLM6.txt.gz	5066_134	CLM6	CMRF35-like molecule 6	CD300C	Q08708	ENSG00000167850	10871	HGNC:19320
5069_9_CD55_DAF.txt.gz	5069_9	DAF	Complement decay-accelerating factor	CD55	P08174	ENSG00000196352	1604	HGNC:2665
5076_53_EPHA10_EPHAA.txt.gz	5076_53	EPHAA	Ephrin type-A receptor 10	EPHA10	Q5JZY3	ENSG00000183317	284656	HGNC:19987
5078_82_EPHB6_EphB6.txt.gz	5078_82	EphB6	Ephrin type-B receptor 6	EPHB6	O15197	ENSG00000106123	2051	HGNC:3396
5085_18_IL20RA_IL_20_Ra.txt.gz	5085_18	IL-20 Ra	Interleukin-20 receptor subunit alpha	IL20RA	Q9UHF4	ENSG00000016402	53832	HGNC:6003
5087_5_IL22RA2_IL_22BP.txt.gz	5087_5	IL-22BP	Interleukin-22 receptor subunit alpha-2	IL22RA2	Q969J5	ENSG00000164485	116379	HGNC:14901
5089_11_IL7R_IL_7_Ra.txt.gz	5089_11	IL-7 Ra	Interleukin-7 receptor subunit alpha	IL7R	P16871	ENSG00000168685	3575	HGNC:6024
5090_49_LILRB1_ILT_2.txt.gz	5090_49	ILT-2	Leukocyte immunoglobulin-like receptor subfamily B member 1	LILRB1	Q8NHL6	ENSG00000104972	10859	HGNC:6605
5091_28_LILRB2_ILT_4.txt.gz	5091_28	ILT-4	Leukocyte immunoglobulin-like receptor subfamily B member 2	LILRB2	Q8N423	ENSG00000131042	10288	HGNC:6606
5092_51_JAG1_JAG1.txt.gz	5092_51	JAG1	Protein jagged-1	JAG1	P78504	ENSG00000101384	182	HGNC:6188
5095_21_KIR2DL4_KI2L4.txt.gz	5095_21	KI2L4	Killer cell immunoglobulin-like receptor 2DL4	KIR2DL4	Q99706	ENSG00000215764	3805	HGNC:6332
5103_30_CD200R1_MO2R1.txt.gz	5103_30	MO2R1	Cell surface glycoprotein CD200 receptor 1	CD200R1	Q8TD46	ENSG00000163606	131450	HGNC:24235
5105_2_RTN4R_Nogo_Receptor.txt.gz	5105_2	Nogo Receptor	Reticulon-4 receptor	RTN4R	Q9BZR6	ENSG00000040608	65078	HGNC:18601
5107_7_NOTCH1_Notch_1.txt.gz	5107_7	Notch 1	Neurogenic locus notch homolog protein 1	NOTCH1	P46531	ENSG00000148400	4851	HGNC:7881
5108_72_NOTCH3_Notch_3.txt.gz	5108_72	Notch-3	Neurogenic locus notch homolog protein 3	NOTCH3	Q9UM47	ENSG00000074181	4854	HGNC:7883
5111_15_NRXN3_NRX3B.txt.gz	5111_15	NRX3B	Neurexin-3-beta	NRXN3	Q9HDB5	ENSG00000021645	9369	HGNC:8010
5112_73_CD200_OX2G.txt.gz	5112_73	OX2G	OX-2 membrane glycoprotein	CD200	P41217	ENSG00000091972	4345	HGNC:7203
5121_3_SEMA6B_SEM6B.txt.gz	5121_3	SEM6B	Semaphorin-6B	SEMA6B	Q9H3T3	ENSG00000167680	10501	HGNC:10739
5128_53_SLAMF6_SLAF6.txt.gz	5128_53	SLAF6	SLAM family member 6	SLAMF6	Q96DU3	ENSG00000162739	114836	HGNC:21392
5131_15_TNFRSF19_TAJ.txt.gz	5131_15	TAJ	Tumor necrosis factor receptor superfamily member 19	TNFRSF19	Q9NS68	ENSG00000127863	55504	HGNC:11915
5196_7_NMT1_NMT1.txt.gz	5196_7	NMT1	Glycylpeptide N-tetradecanoyltransferase 1	NMT1	P30419	ENSG00000136448	4836	HGNC:7857
5202_4_PPID_PPID.txt.gz	5202_4	PPID	Peptidyl-prolyl cis-trans isomerase D	PPID	Q08752	ENSG00000171497	5481	HGNC:9257
5227_60_PDK1_PDK1.txt.gz	5227_60	PDK1	[Pyruvate dehydrogenase (acetyl-transferring)] kinase isozyme 1, mitochondrial	PDK1	Q15118	ENSG00000152256	5163	HGNC:8809
5231_79_PCSK9_PCSK9.txt.gz	5231_79	PCSK9	Proprotein convertase subtilisin/kexin type 9	PCSK9	Q8NBP7	ENSG00000169174	255738	HGNC:20001
5238_26_PPIE_PPIE.txt.gz	5238_26	PPIE	Peptidyl-prolyl cis-trans isomerase E	PPIE	Q9UNP9	ENSG00000084072	10450	HGNC:9258
5256_86_PDE5A_PDE5A.txt.gz	5256_86	PDE5A	cGMP-specific 3',5'-cyclic phosphodiesterase	PDE5A	O76074	ENSG00000138735	8654	HGNC:8784
5301_7_CCL11_Eotaxin.txt.gz	5301_7	Eotaxin	Eotaxin	CCL11	P51671	ENSG00000172156	6356	HGNC:10610
5316_54_F2_Prothrombin.txt.gz	5316_54	Prothrombin	Prothrombin	F2	P00734	ENSG00000180210	2147	HGNC:3535
5337_64_CD86_B7_2.txt.gz	5337_64	B7-2	T-lymphocyte activation antigen CD86	CD86	P42081	ENSG00000114013	942	HGNC:1705
5339_49_S100A9_calgranulin_B.txt.gz	5339_49	calgranulin B	Protein S100-A9	S100A9	P06702	ENSG00000163220	6280	HGNC:10499
5350_14_GPC6_GPC6.txt.gz	5350_14	GPC6	Glypican-6	GPC6	Q9Y625	ENSG00000183098	10082	HGNC:4454
5353_89_IL1RN_IL_1Ra.txt.gz	5353_89	IL-1Ra	Interleukin-1 receptor antagonist protein	IL1RN	P18510	ENSG00000136689	3557	HGNC:6000
5355_69_TNFSF14_LIGHT.txt.gz	5355_69	LIGHT	Tumor necrosis factor ligand superfamily member 14	TNFSF14	O43557	ENSG00000125735	8740	HGNC:11930
5358_3_OMD_OMD.txt.gz	5358_3	OMD	Osteomodulin	OMD	Q99983	ENSG00000127083	4958	HGNC:8134
5363_51_SEMA3E_Semaphorin_3E.txt.gz	5363_51	Semaphorin 3E	Semaphorin-3E	SEMA3E	O15041	ENSG00000170381	9723	HGNC:10727
5392_73_FAS_Fas__soluble.txt.gz	5392_73	Fas, soluble	Tumor necrosis factor receptor superfamily member 6	FAS	P25445	ENSG00000026103	355	HGNC:11920
5400_52_LEPR_sLeptin_R.txt.gz	5400_52	sLeptin R	Leptin receptor	LEPR	P48357	ENSG00000116678	3953	HGNC:6554
5404_53_TNFRSF21_DR6.txt.gz	5404_53	DR6	Tumor necrosis factor receptor superfamily member 21	TNFRSF21	O75509	ENSG00000146072	27242	HGNC:13469
5430_66_SIRPA_SHPS1.txt.gz	5430_66	SHPS1	Tyrosine-protein phosphatase non-receptor type substrate 1	SIRPA	P78324	ENSG00000198053	140885	HGNC:9662
5443_62_NPPA_ANP.txt.gz	5443_62	ANP	Atrial natriuretic factor	NPPA	P01160	ENSG00000175206	4878	HGNC:7939
5451_1_ALCAM_ALCAM.txt.gz	5451_1	ALCAM	CD166 antigen	ALCAM	Q13740	ENSG00000170017	214	HGNC:400
5452_71_ASGR1_ASGR1.txt.gz	5452_71	ASGR1	Asialoglycoprotein receptor 1	ASGR1	P07306	ENSG00000141505	432	HGNC:742
5456_59_CNDP1_CNDP1.txt.gz	5456_59	CNDP1	Beta-Ala-His dipeptidase	CNDP1	Q96KN2	ENSG00000150656	84735	HGNC:20675
5459_33_CST1_CYTN.txt.gz	5459_33	CYTN	Cystatin-SN	CST1	P01037	ENSG00000170373	1469	HGNC:2473
5462_62_FCN3_Ficolin_3.txt.gz	5462_62	Ficolin-3	Ficolin-3	FCN3	O75636	ENSG00000142748	8547	HGNC:3625
5475_10_PRKCB_PKC_B_II.txt.gz	5475_10	PKC-B-II	Protein kinase C beta type (splice variant beta-II)	PRKCB	P05771	ENSG00000166501	5579	HGNC:9395
5478_50_FOLH1_PSMA.txt.gz	5478_50	PSMA	Glutamate carboxypeptidase 2	FOLH1	Q04609	ENSG00000086205	2346	HGNC:3788
5480_49_CCL5_RANTES.txt.gz	5480_49	RANTES	C-C motif chemokine 5	CCL5	P13501	ENSG00000161570	6352	HGNC:10632
5487_7_SLAMF7_SLAF7.txt.gz	5487_7	SLAF7	SLAM family member 7	SLAMF7	Q9NQ25	ENSG00000026751	57823	HGNC:21394
5491_12_SPOCK2_Testican_2.txt.gz	5491_12	Testican-2	Testican-2	SPOCK2	Q92563	ENSG00000107742	9806	HGNC:13564
5508_62_CTSD_Cathepsin_D.txt.gz	5508_62	Cathepsin D	Cathepsin D	CTSD	P07339	ENSG00000117984	1509	HGNC:2529
5509_7_EGF_EGF.txt.gz	5509_7	EGF	Epidermal growth factor	EGF	P01133	ENSG00000138798	1950	HGNC:3229
5532_53_FGFR1_bFGF_R.txt.gz	5532_53	bFGF-R	Fibroblast growth factor receptor 1	FGFR1	P11362	ENSG00000077782	2260	HGNC:3688
5542_22_NRP1_NRP1.txt.gz	5542_22	NRP1	Neuropilin-1	NRP1	O14786	ENSG00000099250	8829	HGNC:8004
5581_28_FGL1_FGL1.txt.gz	5581_28	FGL1	Fibrinogen-like protein 1	FGL1	Q08830	ENSG00000104760	2267	HGNC:3695
5584_21_TCN2_Holo_TC_II.txt.gz	5584_21	Holo-TC II	Holo-Transcobalamin-2	TCN2	P20062	ENSG00000185339	6948	HGNC:11653
5586_66_MINPP1_MINP1.txt.gz	5586_66	MINP1	Multiple inositol polyphosphate phosphatase 1	MINPP1	Q9UNW1	ENSG00000107789	9562	HGNC:7102
5598_3_GREM2_GREM2.txt.gz	5598_3	GREM2	Gremlin-2	GREM2	Q9H772	ENSG00000180875	64388	HGNC:17655
5601_2_PGLYRP2_PGRP_L.txt.gz	5601_2	PGRP-L	N-acetylmuramoyl-L-alanine amidase	PGLYRP2	Q96PD5	ENSG00000161031	114770	HGNC:30013
5604_30_HPSE_HPSE.txt.gz	5604_30	HPSE	Heparanase	HPSE	Q9Y251	ENSG00000173083	10855	HGNC:5164
5605_77_MFNG_MFNG.txt.gz	5605_77	MFNG	Beta-1,3-N-acetylglucosaminyltransferase manic fringe	MFNG	O00587	ENSG00000100060	4242	HGNC:7038
5609_92_FAM19A5_F19A5.txt.gz	5609_92	F19A5	Protein FAM19A5	FAM19A5	Q7Z5A7	ENSG00000219438	25817	HGNC:21592
5618_50_FAM3B_FAM3B.txt.gz	5618_50	FAM3B	Protein FAM3B	FAM3B	P58499	ENSG00000183844	54097	HGNC:1253
5620_13_PAM_AMD.txt.gz	5620_13	AMD	Peptidyl-glycine alpha-amidating monooxygenase	PAM	P19021	ENSG00000145730	5066	HGNC:8596
5621_64_THSD1_THSD1.txt.gz	5621_64	THSD1	Thrombospondin type-1 domain-containing protein 1	THSD1	Q9NS62	ENSG00000136114	55901	HGNC:17754
5628_21_SEMA3G_SEM3G.txt.gz	5628_21	SEM3G	Semaphorin-3G	SEMA3G	Q9NS98	ENSG00000010319	56920	HGNC:30400
5630_48_CD300A_CM35H.txt.gz	5630_48	CM35H	CMRF35-like molecule 8	CD300A	Q9UGN4	ENSG00000167851	11314	HGNC:19319
5631_83_MLN_MOTI.txt.gz	5631_83	MOTI	Promotilin	MLN	P12872	ENSG00000096395	4295	HGNC:7141
5632_6_CRTAC1_CRAC1.txt.gz	5632_6	CRAC1	Cartilage acidic protein 1	CRTAC1	Q9NQ79	ENSG00000095713	55118	HGNC:14882
5636_10_MFAP4_MFAP4.txt.gz	5636_10	MFAP4	Microfibril-associated glycoprotein 4	MFAP4	P55083	ENSG00000166482	4239	HGNC:7035
5637_81_NTNG1_NTNG1.txt.gz	5637_81	NTNG1	Netrin-G1	NTNG1	Q9Y2I2	ENSG00000162631	22854	HGNC:23319
5644_60_RNASE4_RNAS4.txt.gz	5644_60	RNAS4	Ribonuclease 4	RNASE4	P34096	ENSG00000181784	6038	HGNC:10047
5646_20_RNASE6_RNAS6.txt.gz	5646_20	RNAS6	Ribonuclease K6	RNASE6	Q93091	ENSG00000169413	6039	HGNC:10048
5648_28_CTRB2_CTRB2.txt.gz	5648_28	CTRB2	Chymotrypsinogen B2	CTRB2	Q6GPI1	ENSG00000168928	440387	HGNC:2522
5656_53_ENDOU_PP11.txt.gz	5656_53	PP11	Poly(U)-specific endoribonuclease	ENDOU	P21128	ENSG00000111405	8909	HGNC:14369
5657_28_ST3GAL1_SIA4A.txt.gz	5657_28	SIA4A	CMP-N-acetylneuraminate-beta-galactosamide-alpha-2,3-sialyltransferase 1	ST3GAL1	Q11201	ENSG00000008513	6482	HGNC:10862
5658_64_F13B_coagulation_factor_XIII_B.txt.gz	5658_64	coagulation factor XIII B	Coagulation factor XIII B chain	F13B	P05160	ENSG00000143278	2165	HGNC:3534
5660_51_SOD3_SOD3.txt.gz	5660_51	SOD3	Extracellular superoxide dismutase [Cu-Zn]	SOD3	P08294	ENSG00000109610	6649	HGNC:11181
5663_18_PF4V1_PF4V.txt.gz	5663_18	PF4V	Platelet factor 4 variant	PF4V1	P10720	ENSG00000109272	5197	HGNC:8862
5671_1_CTRB1_Chymotrypsin.txt.gz	5671_1	Chymotrypsin	Chymotrypsinogen B	CTRB1	P17538	ENSG00000168925	1504	HGNC:2521
5676_54_ASIP_ASIP.txt.gz	5676_54	ASIP	Agouti-signaling protein	ASIP	P42127	ENSG00000101440	434	HGNC:745
5680_54_OBP2B_OBP2B.txt.gz	5680_54	OBP2B	Odorant-binding protein 2b	OBP2B	Q9NPH6	ENSG00000171102	29989	HGNC:23381
5682_13_VASN_VASN.txt.gz	5682_13	VASN	Vasorin	VASN	Q6EMK4	ENSG00000168140	114990	HGNC:18517
5687_5_PRKCSH_GLU2B.txt.gz	5687_5	GLU2B	Glucosidase 2 subunit beta	PRKCSH	P14314	ENSG00000130175	5589	HGNC:9411
5688_65_CBLN4_CBLN4.txt.gz	5688_65	CBLN4	Cerebellin-4	CBLN4	Q9NTU7	ENSG00000054803	140689	HGNC:16231
5691_2_CRISPLD2_CRLD2.txt.gz	5691_2	CRLD2	Cysteine-rich secretory protein LCCL domain-containing 2	CRISPLD2	Q9H0B8	ENSG00000103196	83716	HGNC:25248
5701_81_CLEC3B_Tetranectin.txt.gz	5701_81	Tetranectin	Tetranectin	CLEC3B	P05452	ENSG00000163815	7123	HGNC:11891
5704_74_GZMM_Granzyme_M.txt.gz	5704_74	Granzyme M	Granzyme M	GZMM	P51124	ENSG00000197540	3004	HGNC:4712
5708_1_LEAP2_LEAP2.txt.gz	5708_1	LEAP2	Liver-expressed antimicrobial peptide 2	LEAP2	Q969E1	ENSG00000164406	116842	HGNC:29571
5713_9_IFNL3_IFN_lambda_3.txt.gz	5713_9	IFN-lambda 3	Interferon lambda-3	IFNL3	Q8IZI9	ENSG00000197110	282617	HGNC:18365
5722_78_PRCP_Prolylcarboxypeptidase.txt.gz	5722_78	Prolylcarboxypeptidase	Lysosomal Pro-X carboxypeptidase	PRCP	P42785	ENSG00000137509	5547	HGNC:9344
5728_60_FCRL1_FCRL1.txt.gz	5728_60	FCRL1	Fc receptor-like protein 1	FCRL1	Q96LA6	ENSG00000163534	115350	HGNC:18509
5731_1_SPINK6_ISK6.txt.gz	5731_1	ISK6	Serine protease inhibitor Kazal-type 6	SPINK6	Q6UWN8	ENSG00000178172	404203	HGNC:29486
5734_13_PVRL4_nectin_4.txt.gz	5734_13	nectin-4	Nectin-4	PVRL4	Q96NY8	ENSG00000143217	81607	HGNC:19688
5737_61_SEMA4D_SEM4D.txt.gz	5737_61	SEM4D	Semaphorin-4D	SEMA4D	Q92854	ENSG00000187764	10507	HGNC:10732
5742_14_ACP6_PPA6.txt.gz	5742_14	PPA6	Lysophosphatidic acid phosphatase type 6	ACP6	Q9NPH0	ENSG00000162836	51205	HGNC:29609
5749_53_CLPS_COL.txt.gz	5749_53	COL	Colipase	CLPS	P04118	ENSG00000137392	1208	HGNC:2085
5763_67_DEFB104A_HBD_4.txt.gz	5763_67	HBD-4	Beta-defensin 104	DEFB104A	Q8WTQ1	ENSG00000177023	140596	HGNC:18115
5803_24_C3_C3d.txt.gz	5803_24	C3d	Complement C3d fragment	C3	P01024	ENSG00000125730	718	HGNC:1318
5810_25_TDGF1_Cripto.txt.gz	5810_25	Cripto	Teratocarcinoma-derived growth factor 1	TDGF1	P13385	ENSG00000241186	6997	HGNC:11701
5813_58_EPO_Epo.txt.gz	5813_58	Epo	Erythropoietin	EPO	P01588	ENSG00000130427	2056	HGNC:3415
5825_49_IFNGR1_IFN_g_R1.txt.gz	5825_49	IFN-g R1	Interferon gamma receptor 1	IFNGR1	P15260	ENSG00000027697	3459	HGNC:5439
5834_18_IL9_IL_9.txt.gz	5834_18	IL-9	Interleukin-9	IL9	P15248	ENSG00000145839	3578	HGNC:6029
5837_49_LIFR_LIF_sR.txt.gz	5837_49	LIF sR	Leukemia inhibitory factor receptor	LIFR	P42702	ENSG00000113594	3977	HGNC:6597
5852_6_S100A12_S100A12.txt.gz	5852_6	S100A12	Protein S100-A12	S100A12	P80511	ENSG00000163221	6283	HGNC:10489
5939_42_TNFSF12_TWEAK.txt.gz	5939_42	TWEAK	Tumor necrosis factor ligand superfamily member 12	TNFSF12	O43508	ENSG00000239697	8742	HGNC:11927
5963_9_DMKN_Dermokine.txt.gz	5963_9	Dermokine	Dermokine	DMKN	Q6E0U4	ENSG00000161249	93099	HGNC:25063
5980_55_BOLA3_BOLA3.txt.gz	5980_55	BOLA3	BolA-like protein 3	BOLA3	Q53S33	ENSG00000163170	388962	HGNC:24415
5988_49_TNFSF14_LIGHT.txt.gz	5988_49	LIGHT	Tumor necrosis factor ligand superfamily member 14	TNFSF14	O43557	ENSG00000125735	8740	HGNC:11930
6039_24_CRHBP_CRHBP.txt.gz	6039_24	CRHBP	Corticotropin-releasing factor-binding protein	CRHBP	P24387	ENSG00000145708	1393	HGNC:2356
6049_64_PTPRS_PTPRS.txt.gz	6049_64	PTPRS	Receptor-type tyrosine-protein phosphatase S	PTPRS	Q13332	ENSG00000105426	5802	HGNC:9681
6060_2_PIP_PIP.txt.gz	6060_2	PIP	Prolactin-inducible protein	PIP	P12273	ENSG00000159763	5304	HGNC:8993
6077_63_CECR1_CECR1.txt.gz	6077_63	CECR1	Adenosine deaminase CECR1	CECR1	Q9NZK5	ENSG00000093072	51816	HGNC:1839
6081_52_PCOLCE2_PCOC2.txt.gz	6081_52	PCOC2	Procollagen C-endopeptidase enhancer 2	PCOLCE2	Q9UKZ9	ENSG00000163710	26577	HGNC:8739
6086_15_CHRDL2_CRDL2.txt.gz	6086_15	CRDL2	Chordin-like protein 2	CHRDL2	Q6WN34	ENSG00000054938	25884	HGNC:24168
6151_18_MAP2K3_MP2K3.txt.gz	6151_18	MP2K3	Dual specificity mitogen-activated protein kinase kinase 3	MAP2K3	P46734	ENSG00000034152	5606	HGNC:6843
6207_10_PSAP_prosaposin.txt.gz	6207_10	prosaposin	Prosaposin	PSAP	P07602	ENSG00000197746	5660	HGNC:9498
6223_5_GUCA2B_GUC2B.txt.gz	6223_5	GUC2B	Guanylate cyclase activator 2B	GUCA2B	Q16661	ENSG00000044012	2981	HGNC:4683
6227_1_KLK10_kallikrein_10.txt.gz	6227_1	kallikrein 10	Kallikrein-10	KLK10	O43240	ENSG00000129451	5655	HGNC:6358
6234_74_VIT_VITRN.txt.gz	6234_74	VITRN	Vitrin	VIT	Q6UXI7	ENSG00000205221	5212	HGNC:12697
6245_4_PVRL2_Nectin_2.txt.gz	6245_4	Nectin-2	Nectin-2	PVRL2	Q92692	ENSG00000130202	5819	HGNC:9707
6247_9_SIRPB1_SIRB1.txt.gz	6247_9	SIRB1	Signal-regulatory protein beta-1	SIRPB1	O00241	ENSG00000101307	10326	HGNC:15928
6252_62_SCGB3A1_Secretoglobin_family_3A_member_1.txt.gz	6252_62	Secretoglobin family 3A member 1	Secretoglobin family 3A member 1	SCGB3A1	Q96QR1	ENSG00000161055	92304	HGNC:18384
6255_74_CPXM1_CPXM1.txt.gz	6255_74	CPXM1	Probable carboxypeptidase X1	CPXM1	Q96SM3	ENSG00000088882	56265	HGNC:15771
6342_10_NPNT_Nephronectin.txt.gz	6342_10	Nephronectin	Nephronectin	NPNT	Q6UXI9	ENSG00000168743	255743	HGNC:27405
6364_7_TAPBPL_TPSNR.txt.gz	6364_7	TPSNR	Tapasin-related protein	TAPBPL	Q9BX59	ENSG00000139192	55080	HGNC:30683
6367_66_FMOD_fibromodulin.txt.gz	6367_66	fibromodulin	fibromodulin	FMOD	Q06828	ENSG00000122176	2331	HGNC:3774
6373_54_SEMG2_SEMG2.txt.gz	6373_54	DLK1	Protein delta homolog 1	DLK1	P80370	ENSG00000185559	8788	HGNC:2907
6382_17_MANBA_MANBA.txt.gz	6382_17	MANBA	Beta-mannosidase	MANBA	O00462	ENSG00000109323	4126	HGNC:6831
6383_90_TLL1_TLL1.txt.gz	6383_90	TLL1	Tolloid-like protein 1	TLL1	O43897	ENSG00000038295	7092	HGNC:11843
6385_63_VWA1_VWA1.txt.gz	6385_63	VWA1	von Willebrand factor A domain-containing protein 1	VWA1	Q6PCB0	ENSG00000179403	64856	HGNC:30910
6392_7_WISP2_WISP_2.txt.gz	6392_7	WISP-2	WNT1-inducible-signaling pathway protein 2	WISP2	O76076	ENSG00000064205	8839	HGNC:12770
6393_63_HSP90B1_Endoplasmin.txt.gz	6393_63	Endoplasmin	Endoplasmin	HSP90B1	P14625	ENSG00000166598	7184	HGNC:12028
6404_20_C1QL1_C1QRF.txt.gz	6404_20	C1QRF	C1q-related factor	C1QL1	O75973	ENSG00000131094	10882	HGNC:24182
6408_2_INHBC_INHBC.txt.gz	6408_2	INHBC	Inhibin beta C chain	INHBC	P55103	ENSG00000175189	3626	HGNC:6068
6415_90_CPN2_CPN2.txt.gz	6415_90	CPN2	Carboxypeptidase N subunit 2	CPN2	P22792	ENSG00000178772	1585	HGNC:2313
6416_8_GKN2_GKN2.txt.gz	6416_8	GKN2	Gastrokine-2	GKN2	Q86XP6	ENSG00000183607	200504	HGNC:24588
6425_87_MMP19_MMP19.txt.gz	6425_87	MMP19	Matrix metalloproteinase-19	MMP19	Q99542	ENSG00000123342	4327	HGNC:7165
6431_68_PCYOX1_PCYOX.txt.gz	6431_68	PCYOX	Prenylcysteine oxidase 1	PCYOX1	Q9UHG3	ENSG00000116005	51449	HGNC:20588
6433_57_FAM20A_FA20A.txt.gz	6433_57	FA20A	Pseudokinase FAM20A	FAM20A	Q96MK3	ENSG00000108950	54757	HGNC:23015
6434_18_AOC2_Amine_oxidase.txt.gz	6434_18	Amine oxidase	Retina-specific copper amine oxidase	AOC2	O75106	ENSG00000131480	314	HGNC:549
6448_36_SEMA3C_Sema_E.txt.gz	6448_36	Sema E	Semaphorin-3C	SEMA3C	Q99985	ENSG00000075223	10512	HGNC:10725
6451_64_ASPN_ASPN.txt.gz	6451_64	ASPN	Asporin	ASPN	Q9BXN1	ENSG00000106819	54829	HGNC:14872
6455_52_HAPLN4_HPLN4.txt.gz	6455_52	HPLN4	Hyaluronan and proteoglycan link protein 4	HAPLN4	Q86UW8	ENSG00000187664	404037	HGNC:31357
6461_54_APOC3_Apo_C_III.txt.gz	6461_54	Apo C-III	Apolipoprotein C-III	APOC3	P02656	ENSG00000110245	345	HGNC:610
6462_12_TIMP4_TIMP_4.txt.gz	6462_12	TIMP-4	Metalloproteinase inhibitor 4	TIMP4	Q99727	ENSG00000157150	7079	HGNC:11823
6467_65_POGLUT1_KTEL1.txt.gz	6467_65	KTEL1	Protein O-glucosyltransferase 1	POGLUT1	Q8NBL1	ENSG00000163389	56983	HGNC:22954
6470_19_FBLN1_fibulin_1.txt.gz	6470_19	fibulin 1	Fibulin-1	FBLN1	P23142	ENSG00000077942	2192	HGNC:3600
6471_53_CFHR4_FHR4.txt.gz	6471_53	FHR4	Complement factor H-related protein 4	CFHR4	Q92496	ENSG00000134365	10877	HGNC:16979
6472_40_PMEL_GP100.txt.gz	6472_40	GP100	Melanocyte protein PMEL	PMEL	P40967	ENSG00000185664	6490	HGNC:10880
6485_59_IGLL1_IGLL1.txt.gz	6485_59	IGLL1	Immunoglobulin lambda-like polypeptide 1	IGLL1	P15814	ENSG00000128322	3543	HGNC:5870
6493_9_CPZ_CBPZ.txt.gz	6493_9	CBPZ	Carboxypeptidase Z	CPZ	Q66K79	ENSG00000109625	8532	HGNC:2333
6496_60_DLK1_DLK1.txt.gz	6496_60	DLK1	Protein delta homolog 1	DLK1	P80370	ENSG00000185559	8788	HGNC:2907
6520_87_MGP_MGP.txt.gz	6520_87	MGP	Matrix Gla protein	MGP	P08493	ENSG00000111341	4256	HGNC:7060
6521_35_NPTX2_NPTX2.txt.gz	6521_35	NPTX2	Neuronal pentraxin-2	NPTX2	P47972	ENSG00000106236	4885	HGNC:7953
6544_33_NELL1_NELL1.txt.gz	6544_33	NELL1	Protein kinase C-binding protein NELL1	NELL1	Q92832	ENSG00000165973	4745	HGNC:7750
6550_4_ICAM4_ICAM4.txt.gz	6550_4	ICAM4	Intercellular adhesion molecule 4	ICAM4	Q14773	ENSG00000105371	3386	HGNC:5347
6551_94_SERPINA12_Vaspin.txt.gz	6551_94	Vaspin	Serpin A12	SERPINA12	Q8IW75	ENSG00000165953	145264	HGNC:18359
6556_5_ENPP5_ENPP5.txt.gz	6556_5	ENPP5	Ectonucleotide pyrophosphatase/phosphodiesterase family member 5	ENPP5	Q9UJA9	ENSG00000112796	59084	HGNC:13717
6558_5_COLEC10_COL10.txt.gz	6558_5	COL10	Collectin-10	COLEC10	Q9Y6Z7	ENSG00000184374	10584	HGNC:2220
6576_1_ART4_ART4.txt.gz	6576_1	ART4	Ecto-ADP-ribosyltransferase 4	ART4	Q93070	ENSG00000111339	420	HGNC:726
6580_29_PZP_Pregnancy_zone_protein.txt.gz	6580_29	Pregnancy zone protein	Pregnancy zone protein	PZP	P20742	ENSG00000126838	5858	HGNC:9750
6605_17_IGFALS_IGFALS.txt.gz	6605_17	IGFALS	Insulin-like growth factor-binding protein complex acid labile subunit	IGFALS	P35858	ENSG00000099769	3483	HGNC:5468
6609_22_CNP_CN37.txt.gz	6609_22	CN37	2',3'-cyclic-nucleotide 3'-phosphodiesterase	CNP	P09543	ENSG00000173786	1267	HGNC:2158
6617_12_FCRL6_FCRL6.txt.gz	6617_12	FCRL6	Fc receptor-like protein 6	FCRL6	Q6DN72	ENSG00000181036	343413	HGNC:31910
6620_82_LINGO1_LIGO1.txt.gz	6620_82	LIGO1	Leucine-rich repeat and immunoglobulin-like domain-containing nogo receptor-interacting protein 1	LINGO1	Q96FE5	ENSG00000169783	84894	HGNC:21205
6626_81_CHST12_CHSTC.txt.gz	6626_81	CHSTC	Carbohydrate sulfotransferase 12	CHST12	Q9NRB3	ENSG00000136213	55501	HGNC:17423
6627_25_PNLIPRP1_LIPR1.txt.gz	6627_25	LIPR1	Inactive pancreatic lipase-related protein 1	PNLIPRP1	P54315	ENSG00000187021	5407	HGNC:9156
6629_3_DEFB1_HBD_1.txt.gz	6629_3	HBD-1	Beta-defensin 1	DEFB1	P60022	ENSG00000164825	1672	HGNC:2766
6649_51_NTN1_NET1.txt.gz	6649_51	NET1	Netrin-1	NTN1	O95631	ENSG00000065320	9423	HGNC:8029
6706_18_ALPPL2_PPBN.txt.gz	6706_18	PPBN	Alkaline phosphatase, placental-like	ALPPL2	P10696	ENSG00000163286	251	HGNC:441
6715_63_ALPPL2_PPBN.txt.gz	6715_63	PPBN	Alkaline phosphatase, placental-like	ALPPL2	P10696	ENSG00000163286	251	HGNC:441
6984_6_IGSF8_IGSF8.txt.gz	6984_6	IGSF8	Immunoglobulin superfamily member 8	IGSF8	Q969P0	ENSG00000162729	93185	HGNC:17813
7009_8_CD72_CD72.txt.gz	7009_8	CD72	B-cell differentiation antigen CD72	CD72	P21854	ENSG00000137101	971	HGNC:1696
7015_8_LILRB5_LIRB5.txt.gz	7015_8	LIRB5	Leukocyte immunoglobulin-like receptor subfamily B member 5	LILRB5	O75023	ENSG00000105609	10990	HGNC:6609
7019_13_SEMA7A_Semaphorin_7A.txt.gz	7019_13	Semaphorin-7A	Semaphorin-7A	SEMA7A	O75326	ENSG00000138623	8482	HGNC:10741
7049_2_ADAM23_ADAM_23.txt.gz	7049_2	ADAM 23	Disintegrin and metalloproteinase domain-containing protein 23	ADAM23	O75077	ENSG00000114948	8745	HGNC:202
7050_5_NEGR1_NEGR1.txt.gz	7050_5	NEGR1	Neuronal growth regulator 1	NEGR1	Q7Z3B1	ENSG00000172260	257194	HGNC:17302
7059_14_LILRA6_LIRA6.txt.gz	7059_14	LIRA6	Leukocyte immunoglobulin-like receptor subfamily A member 6	LILRA6	Q6PI73	ENSG00000244482	11025	HGNC:15495
7083_74_MATN4_MATN4.txt.gz	7083_74	MATN4	Matrilin-4	MATN4	O95460	ENSG00000124159	8785	HGNC:6910
7110_2_DNAJB11_DJB11.txt.gz	7110_2	DJB11	DnaJ homolog subfamily B member 11	DNAJB11	Q9UBS4	ENSG00000090520	51726	HGNC:14889
7128_9_VWA2_VWA2.txt.gz	7128_9	VWA2	von Willebrand factor A domain-containing protein 2	VWA2	Q5GFL6	ENSG00000165816	340706	HGNC:24709
7140_1_CELA2A_ELA2A.txt.gz	7140_1	ELA2A	Chymotrypsin-like elastase family member 2A	CELA2A	P08217	ENSG00000142615	63036	HGNC:24609
7145_1_ITIH3_ITIH3.txt.gz	7145_1	ITIH3	Inter-alpha-trypsin inhibitor heavy chain H3	ITIH3	Q06033	ENSG00000162267	3699	HGNC:6168
7161_25_H6PD_G6PE.txt.gz	7161_25	G6PE	GDH/6PGL endoplasmic bifunctional protein	H6PD	O95479	ENSG00000049239	9563	HGNC:4795
7163_26_LACRT_lacritin.txt.gz	7163_26	lacritin	Extracellular glycoprotein lacritin	LACRT	Q9GZZ8	ENSG00000135413	90070	HGNC:16430
7185_29_GP5_GPV.txt.gz	7185_29	GPV	Platelet glycoprotein V	GP5	P40197	ENSG00000178732	2814	HGNC:4443
7206_20_FBP1_F16P1.txt.gz	7206_20	F16P1	Fructose-1,6-bisphosphatase 1	FBP1	P09467	ENSG00000165140	2203	HGNC:3606
7211_2_RNASE1_RNase_1.txt.gz	7211_2	RNase 1	Ribonuclease pancreatic	RNASE1	P07998	ENSG00000129538	6035	HGNC:10044
7218_87_ATP1B2_AT1B2.txt.gz	7218_87	AT1B2	Sodium/potassium-transporting ATPase subunit beta-2	ATP1B2	P14415	ENSG00000129244	482	HGNC:805
7227_75_COCH_COCH.txt.gz	7227_75	COCH	Cochlin	COCH	O43405	ENSG00000100473	1690	HGNC:2180
7266_4_SERPINA9_SPA9.txt.gz	7266_4	SPA9	Serpin A9	SERPINA9	Q86WD7	ENSG00000170054	327657	HGNC:15995
7655_11_NPPB_N_terminal_pro_BNP.txt.gz	7655_11	N-terminal pro-BNP	N-terminal pro-BNP	NPPB	P16860	ENSG00000120937	4879	HGNC:7940
7779_86_CHST11_CHSTB.txt.gz	7779_86	CHSTB	Carbohydrate sulfotransferase 11	CHST11	Q9NPF2	ENSG00000171310	50515	HGNC:17422
7784_1_KNG1_Kininogen__HMW.txt.gz	7784_1	Kininogen, HMW	Kininogen-1	KNG1	P01042	ENSG00000113889	3827	HGNC:6383
7787_25_LILRA5_LIRA5.txt.gz	7787_25	LIRA5	Leukocyte immunoglobulin-like receptor subfamily A member 5	LILRA5	A6NI73	ENSG00000262800	353514	HGNC:16309
7810_20_C1QTNF5_C1QTNF5.txt.gz	7810_20	C1QTNF5	Complement C1q tumor necrosis factor-related protein 5	C1QTNF5	Q9BXJ0	ENSG00000223953	114902	HGNC:14344
7841_84_ESAM_ESAM.txt.gz	7841_84	ESAM	Endothelial cell-selective adhesion molecule	ESAM	Q96AP7	ENSG00000149564	90952	HGNC:17474
7849_3_QPCT_Glutaminyl_cyclase.txt.gz	7849_3	Glutaminyl cyclase	Glutaminyl-peptide cyclotransferase	QPCT	Q16769	ENSG00000115828	25797	HGNC:9753
7861_9_ROR2_ROR2.txt.gz	7861_9	ROR2	Tyrosine-protein kinase transmembrane receptor ROR2	ROR2	Q01974	ENSG00000169071	4920	HGNC:10257
7875_86_PLEK_PLEK.txt.gz	7875_86	PLEK	Pleckstrin	PLEK	P08567	ENSG00000115956	5341	HGNC:9070
7891_45_UGT1A6_UGT_1A6.txt.gz	7891_45	UGT 1A6	UDP-glucuronosyltransferase 1-6	UGT1A6	P19224	ENSG00000167165	54578	HGNC:12538
7905_30_HP_HPT.txt.gz	7905_30	HPT	Haptoglobin	HP	P00738	ENSG00000257017	3240	HGNC:5141
7916_10_S100A7_S100A7.txt.gz	7916_10	S100A7	Protein S100-A7	S100A7	P31151	ENSG00000143556	6278	HGNC:10497
7918_114_AMY1A_Amylase__alpha_1A.txt.gz	7918_114	Amylase, alpha 1A	Alpha-amylase 1	AMY1A	P04745	ENSG00000237763	276	HGNC:474
7921_65_FJX1_FJX1.txt.gz	7921_65	FJX1	Four-jointed box protein 1	FJX1	Q86VR8	ENSG00000179431	24147	HGNC:17166
7926_13_SPINT3_SPIT3.txt.gz	7926_13	SPIT3	Kunitz-type protease inhibitor 3	SPINT3	P49223	ENSG00000101446	10816	HGNC:11248
7955_195_ITIH1_ITI_heavy_chain_H1.txt.gz	7955_195	ITI heavy chain H1	Inter-alpha-trypsin inhibitor heavy chain H1	ITIH1	P19827	ENSG00000055957	3697	HGNC:6166
7957_2_SCG3_SCG3.txt.gz	7957_2	SCG3	Secretogranin-3	SCG3	Q8WXD2	ENSG00000104112	29106	HGNC:13707
7968_15_CRTAM_CRTAM.txt.gz	7968_15	CRTAM	Cytotoxic and regulatory T-cell molecule	CRTAM	O95727	ENSG00000109943	56253	HGNC:24313
7999_23_ENTPD1_CD39.txt.gz	7999_23	CD39	Ectonucleoside triphosphate diphosphohydrolase 1	ENTPD1	P49961	ENSG00000138185	953	HGNC:3363
8007_19_CTSB_Cathepsin_B.txt.gz	8007_19	Cathepsin B	Cathepsin B	CTSB	P07858	ENSG00000164733	1508	HGNC:2527
8028_22_SPINK5_SPINK5.txt.gz	8028_22	SPINK5	Serine protease inhibitor Kazal-type 5	SPINK5	Q9NQ38	ENSG00000133710	11005	HGNC:15464
8043_153_COMP_COMP.txt.gz	8043_153	COMP	Cartilage oligomeric matrix protein	COMP	P49747	ENSG00000105664	1311	HGNC:2227
8065_245_PATE4_PATE4.txt.gz	8065_245	PATE4	Prostate and testis expressed protein 4	PATE4	P0C8F1	ENSG00000237353	399968	HGNC:35427
8080_24_MSMP_PSMP.txt.gz	8080_24	PSMP	Prostate-associated microseminoprotein	MSMP	Q1L6U9	ENSG00000215183	692094	HGNC:29663
8097_77_LIPN_LIPN.txt.gz	8097_77	LIPN	Lipase member N	LIPN	Q5VXI9	ENSG00000204020	643418	HGNC:23452
8099_42_SPON2_SPON2.txt.gz	8099_42	SPON2	Spondin-2	SPON2	Q9BUD6	ENSG00000159674	10417	HGNC:11253
8100_15_ADM2_ADM2.txt.gz	8100_15	ADM2	ADM2	ADM2	Q7Z4H4	ENSG00000128165	79924	HGNC:28898
8221_19_MIF_MIF.txt.gz	8221_19	MIF	Macrophage migration inhibitory factor	MIF	P14174	ENSG00000240972	4282	HGNC:7097
8225_86_EPHB2_EPHB2.txt.gz	8225_86	EPHB2	Ephrin type-B receptor 2	EPHB2	P29323	ENSG00000133216	2048	HGNC:3393
8231_122_FLT1_VEGF_sR1.txt.gz	8231_122	VEGF sR1	Vascular endothelial growth factor receptor 1	FLT1	P17948	ENSG00000102755	2321	HGNC:3763
8233_2_ITIH5_ITIH5.txt.gz	8233_2	ITIH5	Inter-alpha-trypsin inhibitor heavy chain H5	ITIH5	Q86UX2	ENSG00000123243	80760	HGNC:21449
8235_48_CHGB_SCG1.txt.gz	8235_48	SCG1	Secretogranin-1	CHGB	P05060	ENSG00000089199	1114	HGNC:1930
8243_55_SPINK1_TATI.txt.gz	8243_55	TATI	Serine protease inhibitor Kazal-type 1	SPINK1	P00995	ENSG00000164266	6690	HGNC:11244
8250_2_PTPRJ_PTPRJ.txt.gz	8250_2	PTPRJ	Receptor-type tyrosine-protein phosphatase eta	PTPRJ	Q12913	ENSG00000149177	5795	HGNC:9673
8252_2_NOTUM_NOTUM.txt.gz	8252_2	NOTUM	Palmitoleoyl-protein carboxylesterase NOTUM	NOTUM	Q6P988	ENSG00000185269	147111	HGNC:27106
8288_27_APOH_b2_Glycoprotein_I.txt.gz	8288_27	b2-Glycoprotein I	Beta-2-glycoprotein 1	APOH	P02749	ENSG00000091583	350	HGNC:616
8289_8_GPNMB_GPNMB.txt.gz	8289_8	GPNMB	Transmembrane glycoprotein NMB	GPNMB	Q14956	ENSG00000136235	10457	HGNC:4462
8299_66_LILRA4_LIRA4.txt.gz	8299_66	LIRA4	Leukocyte immunoglobulin-like receptor subfamily A member 4	LILRA4	P59901	ENSG00000262284	23547	HGNC:15503
8304_50_TNFRSF11B_OPG.txt.gz	8304_50	OPG	Tumor necrosis factor receptor superfamily member 11B	TNFRSF11B	O00300	ENSG00000164761	4982	HGNC:11909
8309_12_HYAL1_HYAL1.txt.gz	8309_12	HYAL1	Hyaluronidase-1	HYAL1	Q12794	ENSG00000114378	3373	HGNC:5320
8323_163_TFF3_TFF3.txt.gz	8323_163	TFF3	Trefoil factor 3	TFF3	Q07654	ENSG00000160180	7033	HGNC:11757
8325_37_ADH4_ADH4.txt.gz	8325_37	ADH4	Alcohol dehydrogenase 4	ADH4	P08319	ENSG00000198099	127	HGNC:252
8327_26_DPEP2_DPEP2.txt.gz	8327_26	DPEP2	Dipeptidase 2	DPEP2	Q9H4A9	ENSG00000167261	64174	HGNC:23028
8345_27_GPX7_GPX7.txt.gz	8345_27	GPX7	Glutathione peroxidase 7	GPX7	Q96SL4	ENSG00000116157	2882	HGNC:4559
8346_9_DPP7_DPP2.txt.gz	8346_9	DPP2	Dipeptidyl peptidase 2	DPP7	Q9UHL4	ENSG00000176978	29952	HGNC:14892
8356_88_OXT_NEU1.txt.gz	8356_88	NEU1	Oxytocin-neurophysin 1	OXT	P01178	ENSG00000101405	5020	HGNC:8528
8360_169_NCR1_NKp46.txt.gz	8360_169	NKp46	Natural cytotoxicity triggering receptor 1	NCR1	O76036	ENSG00000189430	9437	HGNC:6731
8368_102_TNFRSF1B_TNF_sR_II.txt.gz	8368_102	TNF sR-II	Tumor necrosis factor receptor superfamily member 1B	TNFRSF1B	P20333	ENSG00000028137	7133	HGNC:11917
8376_25_LHB_LSHB.txt.gz	8376_25	LSHB	Lutropin subunit beta	LHB	P01229	ENSG00000104826	3972	HGNC:6584
8394_56_RNASE2_RNase_2.txt.gz	8394_56	RNase 2	Non-secretory ribonuclease	RNASE2	P10153	ENSG00000169385	6036	HGNC:10045
8397_147_QSOX2_QSOX2.txt.gz	8397_147	QSOX2	Sulfhydryl oxidase 2	QSOX2	Q6ZRP7	ENSG00000261074	169714	HGNC:30249
8402_22_CYTL1_CYTL1.txt.gz	8402_22	CYTL1	Cytokine-like protein 1	CYTL1	Q9NRR1	ENSG00000170891	54360	HGNC:24435
8403_18_FASN_Fatty_acid_synthase.txt.gz	8403_18	Fatty acid synthase	Fatty acid synthase	FASN	P49327	ENSG00000169710	2194	HGNC:3594
8427_118_RSPO3_RSPO3.txt.gz	8427_118	RSPO3	R-spondin-3	RSPO3	Q9BXY4	ENSG00000146374	84870	HGNC:20866
8428_102_NTM_NTRI.txt.gz	8428_102	NTRI	Neurotrimin	NTM	Q9P121	ENSG00000182667	50863	HGNC:17941
8458_111_SNCA_a_Synuclein.txt.gz	8458_111	a-Synuclein	Alpha-synuclein	SNCA	P37840	ENSG00000145335	6622	HGNC:11138
8464_31_RSPO4_RSPO4.txt.gz	8464_31	RSPO4	R-spondin-4	RSPO4	Q2I0M5	ENSG00000101282	343637	HGNC:16175
8465_52_CTSH_Cathepsin_H.txt.gz	8465_52	Cathepsin H	Cathepsin H	CTSH	P09668	ENSG00000103811	1512	HGNC:2535
8468_19_KLK3_PSA.txt.gz	8468_19	PSA	Prostate-specific antigen	KLK3	P07288	ENSG00000142515	354	HGNC:6364
8469_41_IGFBP2_IGFBP_2.txt.gz	8469_41	IGFBP-2	Insulin-like growth factor-binding protein 2	IGFBP2	P18065	ENSG00000115457	3485	HGNC:5471
8476_11_CHGA_CgA.txt.gz	8476_11	CgA	Chromogranin-A	CHGA	P10645	ENSG00000100604	1113	HGNC:1929
8479_4_MMP10_MMP_10.txt.gz	8479_4	MMP-10	Stromelysin-2	MMP10	P09238	ENSG00000166670	4319	HGNC:7156
8480_29_EFEMP1_FBLN3.txt.gz	8480_29	FBLN3	EGF-containing fibulin-like extracellular matrix protein 1	EFEMP1	Q12805	ENSG00000115380	2202	HGNC:3218
8606_39_GPNMB_GPNMB.txt.gz	8606_39	GPNMB	Transmembrane glycoprotein NMB	GPNMB	Q14956	ENSG00000136235	10457	HGNC:4462
8660_5_OLFML3_OLFL3.txt.gz	8660_5	OLFL3	Olfactomedin-like protein 3	OLFML3	Q9NRN5	ENSG00000116774	56944	HGNC:24956
8697_38_GPC1_Glypican_1.txt.gz	8697_38	Glypican 1	Glypican-1	GPC1	P35052	ENSG00000063660	2817	HGNC:4449
8766_29_LILRA5_LIRA5.txt.gz	8766_29	LIRA5	Leukocyte immunoglobulin-like receptor subfamily A member 5	LILRA5	A6NI73	ENSG00000262800	353514	HGNC:16309
8773_172_EMILIN3_EMIL3.txt.gz	8773_172	EMIL3	EMILIN-3	EMILIN3	Q9NT22	ENSG00000183798	90187	HGNC:16123
8778_3_NOG_Noggin.txt.gz	8778_3	Noggin	Noggin	NOG	Q13253	ENSG00000183691	9241	HGNC:7866
8794_13_DPEP1_DPEP1.txt.gz	8794_13	DPEP1	Dipeptidase 1	DPEP1	P16444	ENSG00000015413	1800	HGNC:3002
8795_48_TFRC_TR.txt.gz	8795_48	TR	Transferrin receptor protein 1	TFRC	P02786	ENSG00000072274	7037	HGNC:11763
8840_61_C1S_C1s.txt.gz	8840_61	C1s	Complement C1s subcomponent	C1S	P09871	ENSG00000182326	716	HGNC:1247
8841_65_CILP2_CILP2.txt.gz	8841_65	CILP2	Cartilage intermediate layer protein 2	CILP2	Q8IUL8	ENSG00000160161	148113	HGNC:24213
8859_51_CA11_CAH11.txt.gz	8859_51	CAH11	Carbonic anhydrase-related protein 11	CA11	O75493	ENSG00000063180	770	HGNC:1370
8885_6_CACNA2D3_CA2D3.txt.gz	8885_6	CA2D3	Voltage-dependent calcium channel subunit alpha-2/delta-3	CACNA2D3	Q8IZS8	ENSG00000157445	55799	HGNC:15460
8893_29_PARP1_PARP.txt.gz	8893_29	PARP	Poly [ADP-ribose] polymerase 1	PARP1	P09874	ENSG00000143799	142	HGNC:270
8925_25_RRM2B_RIR2B.txt.gz	8925_25	RIR2B	Ribonucleoside-diphosphate reductase subunit M2 B	RRM2B	Q7LG56	ENSG00000048392	50484	HGNC:17296
8932_1_ENTPD6_ENTP6.txt.gz	8932_1	ENTP6	Ectonucleoside triphosphate diphosphohydrolase 6	ENTPD6	O75354	ENSG00000197586	955	HGNC:3368
8953_47_HDGF_HDGF.txt.gz	8953_47	HDGF	Hepatoma-derived growth factor	HDGF	P51858	ENSG00000143321	3068	HGNC:4856
8958_51_CHL1_CHL1.txt.gz	8958_51	CHL1	Neural cell adhesion molecule L1-like protein	CHL1	O00533	ENSG00000134121	10752	HGNC:1939
8969_49_CD14_CD14.txt.gz	8969_49	CD14	Monocyte differentiation antigen CD14	CD14	P08571	ENSG00000170458	929	HGNC:1628
8970_9_RIPK2_RIPK2.txt.gz	8970_9	RIPK2	Receptor-interacting serine/threonine-protein kinase 2	RIPK2	O43353	ENSG00000104312	8767	HGNC:10020
8973_23_FCRL4_FCRL4.txt.gz	8973_23	FCRL4	Fc receptor-like protein 4	FCRL4	Q96PJ5	ENSG00000163518	83417	HGNC:18507
8974_172_COL15A1_COFA1.txt.gz	8974_172	COFA1	Collagen alpha-1(XV) chain	COL15A1	P39059	ENSG00000204291	1306	HGNC:2192
8982_65_THBS3_TSP3.txt.gz	8982_65	TSP3	Thrombospondin-3	THBS3	P49746	ENSG00000169231	7059	HGNC:11787
8989_40_SCUBE1_SCUB1.txt.gz	8989_40	SCUB1	Signal peptide, CUB and EGF-like domain-containing protein 1	SCUBE1	Q8IWY4	ENSG00000159307	80274	HGNC:13441
9002_36_SERPINA11_SPA11.txt.gz	9002_36	SPA11	Serpin A11	SERPINA11	Q86U17	ENSG00000186910	256394	HGNC:19193
9017_58_LCT_LPH.txt.gz	9017_58	LPH	Lactase-phlorizin hydrolase	LCT	P09848	ENSG00000115850	3938	HGNC:6530
9026_40_BTNL8_BTNL8.txt.gz	9026_40	BTNL8	Butyrophilin-like protein 8	BTNL8	Q6UX41	ENSG00000113303	79908	HGNC:26131
9076_25_PENK_PENK.txt.gz	9076_25	PENK	Proenkephalin-A	PENK	P01210	ENSG00000181195	5179	HGNC:8831
9092_33_ANGPTL1_ANGL1.txt.gz	9092_33	ANGL1	Angiopoietin-related protein 1	ANGPTL1	O95841	ENSG00000116194	9068	HGNC:489
9094_5_CLEC4C_CLC4C.txt.gz	9094_5	CLC4C	C-type lectin domain family 4 member C	CLEC4C	Q8WTT0	ENSG00000198178	170482	HGNC:13258
9172_69_MMP8_MMP_8.txt.gz	9172_69	MMP-8	Neutrophil collagenase	MMP8	P22894	ENSG00000118113	4317	HGNC:7175
9175_48_DSCAM_DSCAM.txt.gz	9175_48	DSCAM	Down syndrome cell adhesion molecule	DSCAM	O60469	ENSG00000171587	1826	HGNC:3039
9177_6_FAM3B_FAM3B.txt.gz	9177_6	FAM3B	Protein FAM3B	FAM3B	P58499	ENSG00000183844	54097	HGNC:1253
9183_7_IFNAR1_IFN_a_b_R1.txt.gz	9183_7	IFN-a/b R1	Interferon alpha/beta receptor 1	IFNAR1	P17181	ENSG00000142166	3454	HGNC:5432
9185_15_TFF1_TFF1.txt.gz	9185_15	TFF1	Trefoil factor 1	TFF1	P04155	ENSG00000160182	7031	HGNC:11755
9188_119_CXCL9_MIG.txt.gz	9188_119	MIG	C-X-C motif chemokine 9	CXCL9	Q07325	ENSG00000138755	4283	HGNC:7098
9191_8_TFF2_Trefoil_factor_2.txt.gz	9191_8	Trefoil factor 2	Trefoil factor 2	TFF2	Q03403	ENSG00000160181	7032	HGNC:11756
9197_4_LGALS9_LEG9.txt.gz	9197_4	LEG9	Galectin-9	LGALS9	O00182	ENSG00000168961	3965	HGNC:6570
9204_33_POMC_Corticotropin_lipotropin.txt.gz	9204_33	Corticotropin-lipotropin	Pro-opiomelanocortin	POMC	P01189	ENSG00000115138	5443	HGNC:9201
9211_19_SERPINF1_PEDF.txt.gz	9211_19	PEDF	Pigment epithelium-derived factor	SERPINF1	P36955	ENSG00000132386	5176	HGNC:8824
9212_22_CTSF_CATF.txt.gz	9212_22	CATF	Cathepsin F	CTSF	Q9UBX1	ENSG00000174080	8722	HGNC:2531
9223_11_MANF_ARMET.txt.gz	9223_11	ARMET	Mesencephalic astrocyte-derived neurotrophic factor	MANF	P55145	ENSG00000145050	7873	HGNC:15461
9233_71_TFPI2_TFPI__2.txt.gz	9233_71	TFPI -2	Tissue factor pathway inhibitor 2	TFPI2	P48307	ENSG00000105825	7980	HGNC:11761
9234_8_TWSG1_TWSG1.txt.gz	9234_8	TWSG1	Twisted gastrulation protein homolog 1	TWSG1	Q9GZX9	ENSG00000128791	57045	HGNC:12429
9241_40_SIRPG_SIRPG.txt.gz	9241_40	SIRPG	Signal-regulatory protein gamma	SIRPG	Q9P1W8	ENSG00000089012	55423	HGNC:15757
9244_27_PPT1_PPT1.txt.gz	9244_27	PPT1	Palmitoyl-protein thioesterase 1	PPT1	P50897	ENSG00000131238	5538	HGNC:9325
9263_57_SIAE_SIAE.txt.gz	9263_57	SIAE	Sialate O-acetylesterase	SIAE	Q9HAT2	ENSG00000110013	54414	HGNC:18187
9266_1_TREM1_sTREM_1.txt.gz	9266_1	sTREM-1	Triggering receptor expressed on myeloid cells 1	TREM1	Q9NP99	ENSG00000124731	54210	HGNC:17760
9267_2_CPA4_CBPA4.txt.gz	9267_2	CBPA4	Carboxypeptidase A4	CPA4	Q9UI42	ENSG00000128510	51200	HGNC:15740
9275_2_CTSL_Cathepsin_L.txt.gz	9275_2	Siglec-5	Sialic acid-binding Ig-like lectin 5	SIGLEC5	O15389	ENSG00000105501	8778	HGNC:10874
9278_9_EPYC_Epiphycan.txt.gz	9278_9	SDF-1	Stromal cell-derived factor 1	CXCL12	P48061	ENSG00000107562	6387	HGNC:10672
9282_12_CRISP2_CRIS2.txt.gz	9282_12	CRIS2	Cysteine-rich secretory protein 2	CRISP2	P16562	ENSG00000124490	7180	HGNC:12024
9288_7_FKBP7_FKBP7.txt.gz	9288_7	FKBP7	Peptidyl-prolyl cis-trans isomerase FKBP7	FKBP7	Q9Y680	ENSG00000079150	51661	HGNC:3723
9294_45_MFAP2_MFAP2.txt.gz	9294_45	MFAP2	Microfibrillar-associated protein 2	MFAP2	P55001	ENSG00000117122	4237	HGNC:7033
9312_8_AZGP1_AZGP1.txt.gz	9312_8	AZGP1	Zinc-alpha-2-glycoprotein	AZGP1	P25311	ENSG00000160862	563	HGNC:910
9313_27_CBLN1_CBLN1.txt.gz	9313_27	CBLN1	Cerebellin-1	CBLN1	P23435	ENSG00000102924	869	HGNC:1543
9321_400_NMB_NMB.txt.gz	9321_400	NMB	Neuromedin-B	NMB	P08949	ENSG00000197696	4828	HGNC:7842
9326_33_ITIH2_ITI_heavy_chain_H2.txt.gz	9326_33	ITI heavy chain H2	Inter-alpha-trypsin inhibitor heavy chain H2	ITIH2	P19823	ENSG00000151655	3698	HGNC:6167
9337_43_TAC1_TKN1.txt.gz	9337_43	TKN1	Protachykinin-1	TAC1	P20366	ENSG00000006128	6863	HGNC:11517
9339_204_FKBP2_FKBP2.txt.gz	9339_204	FKBP2	Peptidyl-prolyl cis-trans isomerase FKBP2	FKBP2	P26885	ENSG00000173486	2286	HGNC:3718
9341_1_PDGFD_PDGFD.txt.gz	9341_1	PDGFD	Platelet-derived growth factor D	PDGFD	Q9GZP0	ENSG00000170962	80310	HGNC:30620
9343_16_IL2RB_IL_2_sRb.txt.gz	9343_16	IL-2 sRb	Interleukin-2 receptor subunit beta	IL2RB	P14784	ENSG00000100385	3560	HGNC:6009
9348_1_C1RL_C1RL1.txt.gz	9348_1	C1RL1	Complement C1r subcomponent-like protein	C1RL	Q9NZP8	ENSG00000139178	51279	HGNC:21265
9350_3_FSTL4_FSTL4.txt.gz	9350_3	FSTL4	Follistatin-related protein 4	FSTL4	Q6MZW2	ENSG00000053108	23105	HGNC:21389
9357_4_CREG1_CREG1.txt.gz	9357_4	CREG1	Protein CREG1	CREG1	O75629	ENSG00000143162	8804	HGNC:2351
9360_33_EDIL3_EDIL3.txt.gz	9360_33	EDIL3	EGF-like repeat and discoidin I-like domain-containing protein 3	EDIL3	O43854	ENSG00000164176	10085	HGNC:3173
9369_174_LRRC4C_NGL1.txt.gz	9369_174	NGL1	Leucine-rich repeat-containing protein 4C	LRRC4C	Q9HCJ2	ENSG00000148948	57689	HGNC:29317
9370_69_GGH_GGH.txt.gz	9370_69	GGH	Gamma-glutamyl hydrolase	GGH	Q92820	ENSG00000137563	8836	HGNC:4248
9380_2_PLA2G12B_sPLA_2__XIII.txt.gz	9380_2	sPLA(2)-XIII	Group XIIB secretory phospholipase A2-like protein	PLA2G12B	Q9BX93	ENSG00000138308	84647	HGNC:18555
9383_24_CHI3L2_CH3L2.txt.gz	9383_24	CH3L2	Chitinase-3-like protein 2	CHI3L2	Q15782	ENSG00000064886	1117	HGNC:1933
9384_17_CAMP_Cathelicidin_peptide.txt.gz	9384_17	Cathelicidin peptide	Cathelicidin antimicrobial peptide	CAMP	P49913	ENSG00000164047	820	HGNC:1472
9385_4_GAA_GAA.txt.gz	9385_4	GAA	Lysosomal alpha-glucosidase	GAA	P10253	ENSG00000171298	2548	HGNC:4065
9394_19_CPQ_Aminopeptidase.txt.gz	9394_19	Aminopeptidase	Carboxypeptidase Q	CPQ	Q9Y646	ENSG00000104324	10404	HGNC:16910
9398_30_GALP_GALP.txt.gz	9398_30	GALP	Galanin-like peptide	GALP	Q9UBC7	ENSG00000197487	85569	HGNC:24840
9409_11_TPSAB1_TRYB1.txt.gz	9409_11	TRYB1	Tryptase beta-1	TPSAB1	Q15661	ENSG00000172236	7177	HGNC:12019
9416_77_CPM_CBPM.txt.gz	9416_77	CBPM	Carboxypeptidase M	CPM	P14384	ENSG00000135678	1368	HGNC:2311
9449_150_C4BPA_C4b_binding_protein_alpha_chain.txt.gz	9449_150	C4b-binding protein alpha chain	C4b-binding protein alpha chain	C4BPA	P04003	ENSG00000123838	722	HGNC:1325
9459_7_FAS_Fas__soluble.txt.gz	9459_7	Fas, soluble	Tumor necrosis factor receptor superfamily member 6	FAS	P25445	ENSG00000026103	355	HGNC:11920
9525_1_PTK7_PTK7.txt.gz	9525_1	PTK7	Inactive tyrosine-protein kinase 7	PTK7	Q13308	ENSG00000112655	5754	HGNC:9618
9545_156_GZMK_Granzyme_K.txt.gz	9545_156	Granzyme K	Granzyme K	GZMK	P49863	ENSG00000113088	3003	HGNC:4711
9580_5_LAMC2_Laminin_gamma_2.txt.gz	9580_5	Laminin gamma-2	Laminin subunit gamma-2	LAMC2	Q13753	ENSG00000058085	3918	HGNC:6493
9713_67_PDGFRL_PGFRL.txt.gz	9713_67	PGFRL	Platelet-derived growth factor receptor-like protein	PDGFRL	Q15198	ENSG00000104213	5157	HGNC:8805
9719_145_MMP16_MMP_16.txt.gz	9719_145	MMP-16	Matrix metalloproteinase-16	MMP16	P51512	ENSG00000156103	4325	HGNC:7162
9747_48_MARK3_MARK3.txt.gz	9747_48	MARK3	MAP/microtubule affinity-regulating kinase 3	MARK3	P27448	ENSG00000075413	4140	HGNC:6897
9748_31_GSTM3_GSTM3_3.txt.gz	9748_31	GSTM3-3	Glutathione S-transferase Mu 3	GSTM3	P21266	ENSG00000134202	2947	HGNC:4635
9754_33_NQO2_Quinone_reductase_2.txt.gz	9754_33	Quinone reductase 2	Ribosyldihydronicotinamide dehydrogenase [quinone]	NQO2	P16083	ENSG00000124588	4835	HGNC:7856
9759_13_IDO1_INDO.txt.gz	9759_13	INDO	Indoleamine 2,3-dioxygenase 1	IDO1	P14902	ENSG00000131203	3620	HGNC:6059
9772_153_NLGN2_NLGN2.txt.gz	9772_153	NLGN2	Neuroligin-2	NLGN2	Q8NFZ4	ENSG00000169992	57555	HGNC:14290
9790_28_BRSK2_BR_serine_threonine_kinase_2.txt.gz	9790_28	BR serine/threonine kinase 2	Serine/threonine-protein kinase BRSK2	BRSK2	Q8IWQ3	ENSG00000174672	9024	HGNC:11405
9796_4_CEL_CEL.txt.gz	9796_4	CEL	Bile salt-activated lipase	CEL	P19835	ENSG00000170835	1056	HGNC:1848
9829_91_SULT2A1_SULT_2A1.txt.gz	9829_91	SULT 2A1	Bile salt sulfotransferase	SULT2A1	Q06520	ENSG00000105398	6822	HGNC:11458
9837_60_NQO1_NAD_P_H_dehydrogenase.txt.gz	9837_60	NAD(P)H dehydrogenase	NAD(P)H dehydrogenase [quinone] 1	NQO1	P15559	ENSG00000181019	1728	HGNC:2874
9848_22_CCNH_Cyclin_H.txt.gz	9848_22	Cyclin H	Cyclin-H	CCNH	P51946	ENSG00000134480	902	HGNC:1594
9869_28_NFKB1_NF_kappa_B_p105.txt.gz	9869_28	NF-kappa-B p105	Nuclear factor NF-kappa-B p105 subunit	NFKB1	P19838	ENSG00000109320	4790	HGNC:7794
9883_29_GLO1_Glyoxalase_I.txt.gz	9883_29	Glyoxalase I	Lactoylglutathione lyase	GLO1	Q04760	ENSG00000124767	2739	HGNC:4323
9884_8_PPIL1_PPIL1.txt.gz	9884_8	PPIL1	Peptidyl-prolyl cis-trans isomerase-like 1	PPIL1	Q9Y3C6	ENSG00000137168	51645	HGNC:9260
9901_28_EGLN1_EGLN1.txt.gz	9901_28	EGLN1	Egl nine homolog 1	EGLN1	Q9GZT9	ENSG00000135766	54583	HGNC:1232
9906_21_SPOCK3_TICN3.txt.gz	9906_21	TICN3	Testican-3	SPOCK3	Q9BQ16	ENSG00000196104	50859	HGNC:13565
9916_146_LRRC4B_LRC4B.txt.gz	9916_146	LRC4B	Leucine-rich repeat-containing protein 4B	LRRC4B	Q9NT99	ENSG00000131409	94030	HGNC:25042
9950_229_LAG3_LAG_3.txt.gz	9950_229	LAG-3	Lymphocyte activation gene 3 protein	LAG3	P18627	ENSG00000089692	3902	HGNC:6476
9986_14_NPW_Neuropeptide_W.txt.gz	9986_14	Neuropeptide W	Neuropeptide W	NPW	Q8N729	ENSG00000183971	283869	HGNC:30509
9995_6_DUT_DUT.txt.gz	9995_6	DUT	Deoxyuridine 5'-triphosphate nucleotidohydrolase, mitochondrial	DUT	P33316	ENSG00000128951	1854	HGNC:3078
