# Supplementary material for: Leveraging pQTL-based Mendelian randomization to identify new treatment prospects for primary biliary cholangitis and primary sclerosing cholangitis
Source: Aging (Albany NY). 2024 May 27;16(10):9228–50. doi: 10.18632/aging.205867 (PMC11164478; doi:10.18632/aging.205867)
Supplement: Supplementary Table 4 [file aging-16-205867-s005.xlsx]

## Sheet: Supplementary Table 4
Supplementary Table 4. The detailed results of Mendelian randomization between 1046 druggable proteins and primary biliary cholangitis.
id.exposure	id.outcome	outcome	exposure	method	nsnp	b	se	pval
10037_98_SIGLEC12_SIG12.txt.gz	finngen_R9_CHIRBIL_PRIM.gz	outcome	10037_98_SIGLEC12_SIG12.txt.gz	MR Egger	128	-0.0526752	0.0689218	0.446132
10037_98_SIGLEC12_SIG12.txt.gz	finngen_R9_CHIRBIL_PRIM.gz	outcome	10037_98_SIGLEC12_SIG12.txt.gz	Weighted median	128	-0.0258774	0.0772534	0.737649
10037_98_SIGLEC12_SIG12.txt.gz	finngen_R9_CHIRBIL_PRIM.gz	outcome	10037_98_SIGLEC12_SIG12.txt.gz	Inverse variance weighted	128	-0.0741821	0.0464172	0.110007
10037_98_SIGLEC12_SIG12.txt.gz	finngen_R9_CHIRBIL_PRIM.gz	outcome	10037_98_SIGLEC12_SIG12.txt.gz	Simple mode	128	-0.0246784	0.145495	0.865581
10037_98_SIGLEC12_SIG12.txt.gz	finngen_R9_CHIRBIL_PRIM.gz	outcome	10037_98_SIGLEC12_SIG12.txt.gz	Weighted mode	128	-0.0597229	0.0618805	0.336312
10042_8_SGK3_SGK3.txt.gz	finngen_R9_CHIRBIL_PRIM.gz	outcome	10042_8_SGK3_SGK3.txt.gz	Wald ratio	1	1.34772	2.44493	0.581475
10070_22_PLCG2_PLCG2.txt.gz	finngen_R9_CHIRBIL_PRIM.gz	outcome	10070_22_PLCG2_PLCG2.txt.gz	MR Egger	9	0.169424	0.748665	0.827433
10070_22_PLCG2_PLCG2.txt.gz	finngen_R9_CHIRBIL_PRIM.gz	outcome	10070_22_PLCG2_PLCG2.txt.gz	Weighted median	9	-0.0442313	0.389938	0.909688
10070_22_PLCG2_PLCG2.txt.gz	finngen_R9_CHIRBIL_PRIM.gz	outcome	10070_22_PLCG2_PLCG2.txt.gz	Inverse variance weighted	9	0.146199	0.293443	0.61833
10070_22_PLCG2_PLCG2.txt.gz	finngen_R9_CHIRBIL_PRIM.gz	outcome	10070_22_PLCG2_PLCG2.txt.gz	Simple mode	9	-0.520585	0.646616	0.444034
10070_22_PLCG2_PLCG2.txt.gz	finngen_R9_CHIRBIL_PRIM.gz	outcome	10070_22_PLCG2_PLCG2.txt.gz	Weighted mode	9	-0.253039	0.442898	0.583469
10346_5_STAT3_STAT3.txt.gz	finngen_R9_CHIRBIL_PRIM.gz	outcome	10346_5_STAT3_STAT3.txt.gz	MR Egger	11	1.32263	0.841319	0.150378
10346_5_STAT3_STAT3.txt.gz	finngen_R9_CHIRBIL_PRIM.gz	outcome	10346_5_STAT3_STAT3.txt.gz	Weighted median	11	0.718736	0.346902	0.0382774
10346_5_STAT3_STAT3.txt.gz	finngen_R9_CHIRBIL_PRIM.gz	outcome	10346_5_STAT3_STAT3.txt.gz	Inverse variance weighted	11	0.731259	0.269778	0.00671621
10346_5_STAT3_STAT3.txt.gz	finngen_R9_CHIRBIL_PRIM.gz	outcome	10346_5_STAT3_STAT3.txt.gz	Simple mode	11	0.848402	0.599022	0.187071
10346_5_STAT3_STAT3.txt.gz	finngen_R9_CHIRBIL_PRIM.gz	outcome	10346_5_STAT3_STAT3.txt.gz	Weighted mode	11	0.696459	0.392391	0.106302
10366_11_PDGFRA_PDGFRA.txt.gz	finngen_R9_CHIRBIL_PRIM.gz	outcome	10366_11_PDGFRA_PDGFRA.txt.gz	MR Egger	6	-1.32162	1.94154	0.533421
10366_11_PDGFRA_PDGFRA.txt.gz	finngen_R9_CHIRBIL_PRIM.gz	outcome	10366_11_PDGFRA_PDGFRA.txt.gz	Weighted median	6	0.631609	0.558749	0.258308
10366_11_PDGFRA_PDGFRA.txt.gz	finngen_R9_CHIRBIL_PRIM.gz	outcome	10366_11_PDGFRA_PDGFRA.txt.gz	Inverse variance weighted	6	0.537322	0.451474	0.233988
10366_11_PDGFRA_PDGFRA.txt.gz	finngen_R9_CHIRBIL_PRIM.gz	outcome	10366_11_PDGFRA_PDGFRA.txt.gz	Simple mode	6	-0.348292	0.843231	0.69669
10366_11_PDGFRA_PDGFRA.txt.gz	finngen_R9_CHIRBIL_PRIM.gz	outcome	10366_11_PDGFRA_PDGFRA.txt.gz	Weighted mode	6	0.704662	0.546225	0.25347
10372_18_STAT6_STAT6.txt.gz	finngen_R9_CHIRBIL_PRIM.gz	outcome	10372_18_STAT6_STAT6.txt.gz	MR Egger	11	0.280486	0.687733	0.692921
10372_18_STAT6_STAT6.txt.gz	finngen_R9_CHIRBIL_PRIM.gz	outcome	10372_18_STAT6_STAT6.txt.gz	Weighted median	11	-0.759083	0.428253	0.0763099
10372_18_STAT6_STAT6.txt.gz	finngen_R9_CHIRBIL_PRIM.gz	outcome	10372_18_STAT6_STAT6.txt.gz	Inverse variance weighted	11	-0.624024	0.327739	0.0569068
10372_18_STAT6_STAT6.txt.gz	finngen_R9_CHIRBIL_PRIM.gz	outcome	10372_18_STAT6_STAT6.txt.gz	Simple mode	11	-0.913431	0.760032	0.257117
10372_18_STAT6_STAT6.txt.gz	finngen_R9_CHIRBIL_PRIM.gz	outcome	10372_18_STAT6_STAT6.txt.gz	Weighted mode	11	-0.85268	0.585494	0.175967
10391_1_ANGPTL3_ANGL3.txt.gz	finngen_R9_CHIRBIL_PRIM.gz	outcome	10391_1_ANGPTL3_ANGL3.txt.gz	MR Egger	42	-0.209664	0.234163	0.375942
10391_1_ANGPTL3_ANGL3.txt.gz	finngen_R9_CHIRBIL_PRIM.gz	outcome	10391_1_ANGPTL3_ANGL3.txt.gz	Weighted median	42	-0.211102	0.192062	0.271709
10391_1_ANGPTL3_ANGL3.txt.gz	finngen_R9_CHIRBIL_PRIM.gz	outcome	10391_1_ANGPTL3_ANGL3.txt.gz	Inverse variance weighted	42	-0.267758	0.145004	0.0648125
10391_1_ANGPTL3_ANGL3.txt.gz	finngen_R9_CHIRBIL_PRIM.gz	outcome	10391_1_ANGPTL3_ANGL3.txt.gz	Simple mode	42	-0.0163709	0.452547	0.971318
10391_1_ANGPTL3_ANGL3.txt.gz	finngen_R9_CHIRBIL_PRIM.gz	outcome	10391_1_ANGPTL3_ANGL3.txt.gz	Weighted mode	42	-0.175221	0.19275	0.368633
10396_6_MCL1_Mcl_1.txt.gz	finngen_R9_CHIRBIL_PRIM.gz	outcome	10396_6_MCL1_Mcl_1.txt.gz	MR Egger	3	-0.320545	1.33416	0.849891
10396_6_MCL1_Mcl_1.txt.gz	finngen_R9_CHIRBIL_PRIM.gz	outcome	10396_6_MCL1_Mcl_1.txt.gz	Weighted median	3	-0.134877	0.386558	0.727151
10396_6_MCL1_Mcl_1.txt.gz	finngen_R9_CHIRBIL_PRIM.gz	outcome	10396_6_MCL1_Mcl_1.txt.gz	Inverse variance weighted	3	-0.188714	0.456508	0.679323
10396_6_MCL1_Mcl_1.txt.gz	finngen_R9_CHIRBIL_PRIM.gz	outcome	10396_6_MCL1_Mcl_1.txt.gz	Simple mode	3	-0.0968467	0.545918	0.875534
10396_6_MCL1_Mcl_1.txt.gz	finngen_R9_CHIRBIL_PRIM.gz	outcome	10396_6_MCL1_Mcl_1.txt.gz	Weighted mode	3	-0.15755	0.497989	0.781686
10451_11_NUCB1_NUCB1.txt.gz	finngen_R9_CHIRBIL_PRIM.gz	outcome	10451_11_NUCB1_NUCB1.txt.gz	MR Egger	9	-0.988869	0.660685	0.178125
10451_11_NUCB1_NUCB1.txt.gz	finngen_R9_CHIRBIL_PRIM.gz	outcome	10451_11_NUCB1_NUCB1.txt.gz	Weighted median	9	-0.347872	0.389091	0.371287
10451_11_NUCB1_NUCB1.txt.gz	finngen_R9_CHIRBIL_PRIM.gz	outcome	10451_11_NUCB1_NUCB1.txt.gz	Inverse variance weighted	9	-0.356954	0.300244	0.234486
10451_11_NUCB1_NUCB1.txt.gz	finngen_R9_CHIRBIL_PRIM.gz	outcome	10451_11_NUCB1_NUCB1.txt.gz	Simple mode	9	0.713516	0.761284	0.376056
10451_11_NUCB1_NUCB1.txt.gz	finngen_R9_CHIRBIL_PRIM.gz	outcome	10451_11_NUCB1_NUCB1.txt.gz	Weighted mode	9	-1.04729	0.448131	0.0476369
10462_14_INSL5_INSL5.txt.gz	finngen_R9_CHIRBIL_PRIM.gz	outcome	10462_14_INSL5_INSL5.txt.gz	Wald ratio	1	-0.0205354	1.08716	0.98493
10490_3_RPN1_RPN1.txt.gz	finngen_R9_CHIRBIL_PRIM.gz	outcome	10490_3_RPN1_RPN1.txt.gz	MR Egger	9	-0.678094	0.875789	0.464117
10490_3_RPN1_RPN1.txt.gz	finngen_R9_CHIRBIL_PRIM.gz	outcome	10490_3_RPN1_RPN1.txt.gz	Weighted median	9	-0.52875	0.37014	0.153144
10490_3_RPN1_RPN1.txt.gz	finngen_R9_CHIRBIL_PRIM.gz	outcome	10490_3_RPN1_RPN1.txt.gz	Inverse variance weighted	9	-0.50724	0.300617	0.0915394
10490_3_RPN1_RPN1.txt.gz	finngen_R9_CHIRBIL_PRIM.gz	outcome	10490_3_RPN1_RPN1.txt.gz	Simple mode	9	-0.188493	0.655804	0.781093
10490_3_RPN1_RPN1.txt.gz	finngen_R9_CHIRBIL_PRIM.gz	outcome	10490_3_RPN1_RPN1.txt.gz	Weighted mode	9	-0.52133	0.404354	0.233323
10511_10_COL6A3_Collagen_alpha_3_VI_.txt.gz	finngen_R9_CHIRBIL_PRIM.gz	outcome	10511_10_COL6A3_Collagen_alpha_3_VI_.txt.gz	MR Egger	6	-1.55225	2.40185	0.553313
10511_10_COL6A3_Collagen_alpha_3_VI_.txt.gz	finngen_R9_CHIRBIL_PRIM.gz	outcome	10511_10_COL6A3_Collagen_alpha_3_VI_.txt.gz	Weighted median	6	-0.256833	0.524028	0.624055
10511_10_COL6A3_Collagen_alpha_3_VI_.txt.gz	finngen_R9_CHIRBIL_PRIM.gz	outcome	10511_10_COL6A3_Collagen_alpha_3_VI_.txt.gz	Inverse variance weighted	6	-0.424319	0.538048	0.43033
10511_10_COL6A3_Collagen_alpha_3_VI_.txt.gz	finngen_R9_CHIRBIL_PRIM.gz	outcome	10511_10_COL6A3_Collagen_alpha_3_VI_.txt.gz	Simple mode	6	-0.691736	0.917755	0.484972
10511_10_COL6A3_Collagen_alpha_3_VI_.txt.gz	finngen_R9_CHIRBIL_PRIM.gz	outcome	10511_10_COL6A3_Collagen_alpha_3_VI_.txt.gz	Weighted mode	6	-0.188838	0.561986	0.750499
10512_13_CSF2RB_IL3RB.txt.gz	finngen_R9_CHIRBIL_PRIM.gz	outcome	10512_13_CSF2RB_IL3RB.txt.gz	MR Egger	70	0.109408	0.187059	0.560559
10512_13_CSF2RB_IL3RB.txt.gz	finngen_R9_CHIRBIL_PRIM.gz	outcome	10512_13_CSF2RB_IL3RB.txt.gz	Weighted median	70	-0.00984946	0.136393	0.942432
10512_13_CSF2RB_IL3RB.txt.gz	finngen_R9_CHIRBIL_PRIM.gz	outcome	10512_13_CSF2RB_IL3RB.txt.gz	Inverse variance weighted	70	-0.133752	0.0973608	0.16951
10512_13_CSF2RB_IL3RB.txt.gz	finngen_R9_CHIRBIL_PRIM.gz	outcome	10512_13_CSF2RB_IL3RB.txt.gz	Simple mode	70	0.0571647	0.270819	0.833446
10512_13_CSF2RB_IL3RB.txt.gz	finngen_R9_CHIRBIL_PRIM.gz	outcome	10512_13_CSF2RB_IL3RB.txt.gz	Weighted mode	70	0.0231873	0.155058	0.881564
10514_5_PTGDS_PGD2_synthase.txt.gz	finngen_R9_CHIRBIL_PRIM.gz	outcome	10514_5_PTGDS_PGD2_synthase.txt.gz	MR Egger	7	-0.863973	1.00772	0.430418
10514_5_PTGDS_PGD2_synthase.txt.gz	finngen_R9_CHIRBIL_PRIM.gz	outcome	10514_5_PTGDS_PGD2_synthase.txt.gz	Weighted median	7	-0.302309	0.354154	0.393322
10514_5_PTGDS_PGD2_synthase.txt.gz	finngen_R9_CHIRBIL_PRIM.gz	outcome	10514_5_PTGDS_PGD2_synthase.txt.gz	Inverse variance weighted	7	-0.139491	0.377542	0.711777
10514_5_PTGDS_PGD2_synthase.txt.gz	finngen_R9_CHIRBIL_PRIM.gz	outcome	10514_5_PTGDS_PGD2_synthase.txt.gz	Simple mode	7	-0.405815	0.480144	0.430411
10514_5_PTGDS_PGD2_synthase.txt.gz	finngen_R9_CHIRBIL_PRIM.gz	outcome	10514_5_PTGDS_PGD2_synthase.txt.gz	Weighted mode	7	-0.346645	0.363261	0.376801
10534_40_PARP1_PARP.txt.gz	finngen_R9_CHIRBIL_PRIM.gz	outcome	10534_40_PARP1_PARP.txt.gz	Wald ratio	1	0.328307	1.12576	0.770568
10554_23_GLB1_BGAL.txt.gz	finngen_R9_CHIRBIL_PRIM.gz	outcome	10554_23_GLB1_BGAL.txt.gz	Inverse variance weighted	2	0.544576	1.00833	0.589143
10561_5_PGLYRP3_PGRP_I_alpha.txt.gz	finngen_R9_CHIRBIL_PRIM.gz	outcome	10561_5_PGLYRP3_PGRP_I_alpha.txt.gz	MR Egger	3	-2.32498	1.25588	0.315295
10561_5_PGLYRP3_PGRP_I_alpha.txt.gz	finngen_R9_CHIRBIL_PRIM.gz	outcome	10561_5_PGLYRP3_PGRP_I_alpha.txt.gz	Weighted median	3	-1.46482	0.7865	0.0625385
10561_5_PGLYRP3_PGRP_I_alpha.txt.gz	finngen_R9_CHIRBIL_PRIM.gz	outcome	10561_5_PGLYRP3_PGRP_I_alpha.txt.gz	Inverse variance weighted	3	-1.37477	0.645648	0.03323
10561_5_PGLYRP3_PGRP_I_alpha.txt.gz	finngen_R9_CHIRBIL_PRIM.gz	outcome	10561_5_PGLYRP3_PGRP_I_alpha.txt.gz	Simple mode	3	-1.43315	0.900054	0.252321
10561_5_PGLYRP3_PGRP_I_alpha.txt.gz	finngen_R9_CHIRBIL_PRIM.gz	outcome	10561_5_PGLYRP3_PGRP_I_alpha.txt.gz	Weighted mode	3	-1.63627	0.898994	0.210347
10569_28_SCGB1A1_Urinary_protein_1.txt.gz	finngen_R9_CHIRBIL_PRIM.gz	outcome	10569_28_SCGB1A1_Urinary_protein_1.txt.gz	MR Egger	32	-0.736385	0.356101	0.0473658
10569_28_SCGB1A1_Urinary_protein_1.txt.gz	finngen_R9_CHIRBIL_PRIM.gz	outcome	10569_28_SCGB1A1_Urinary_protein_1.txt.gz	Weighted median	32	-0.722639	0.221587	0.0011094
10569_28_SCGB1A1_Urinary_protein_1.txt.gz	finngen_R9_CHIRBIL_PRIM.gz	outcome	10569_28_SCGB1A1_Urinary_protein_1.txt.gz	Inverse variance weighted	32	-0.493192	0.15443	0.001405
10569_28_SCGB1A1_Urinary_protein_1.txt.gz	finngen_R9_CHIRBIL_PRIM.gz	outcome	10569_28_SCGB1A1_Urinary_protein_1.txt.gz	Simple mode	32	-0.77635	0.382174	0.0508625
10569_28_SCGB1A1_Urinary_protein_1.txt.gz	finngen_R9_CHIRBIL_PRIM.gz	outcome	10569_28_SCGB1A1_Urinary_protein_1.txt.gz	Weighted mode	32	-0.834444	0.279946	0.00555317
10603_1_HTN3_HIS3.txt.gz	finngen_R9_CHIRBIL_PRIM.gz	outcome	10603_1_HTN3_HIS3.txt.gz	MR Egger	4	0.543743	0.687923	0.512124
10603_1_HTN3_HIS3.txt.gz	finngen_R9_CHIRBIL_PRIM.gz	outcome	10603_1_HTN3_HIS3.txt.gz	Weighted median	4	0.561706	0.440709	0.202468
10603_1_HTN3_HIS3.txt.gz	finngen_R9_CHIRBIL_PRIM.gz	outcome	10603_1_HTN3_HIS3.txt.gz	Inverse variance weighted	4	0.630232	0.399685	0.114837
10603_1_HTN3_HIS3.txt.gz	finngen_R9_CHIRBIL_PRIM.gz	outcome	10603_1_HTN3_HIS3.txt.gz	Simple mode	4	0.613399	0.599544	0.381557
10603_1_HTN3_HIS3.txt.gz	finngen_R9_CHIRBIL_PRIM.gz	outcome	10603_1_HTN3_HIS3.txt.gz	Weighted mode	4	0.551856	0.509353	0.357916
10620_21_MSMB_PSP_94.txt.gz	finngen_R9_CHIRBIL_PRIM.gz	outcome	10620_21_MSMB_PSP_94.txt.gz	MR Egger	93	-0.244974	0.0756302	0.00167465
10620_21_MSMB_PSP_94.txt.gz	finngen_R9_CHIRBIL_PRIM.gz	outcome	10620_21_MSMB_PSP_94.txt.gz	Weighted median	93	-0.131991	0.0654123	0.0436088
10620_21_MSMB_PSP_94.txt.gz	finngen_R9_CHIRBIL_PRIM.gz	outcome	10620_21_MSMB_PSP_94.txt.gz	Inverse variance weighted	93	-0.116357	0.0423433	0.005997
10620_21_MSMB_PSP_94.txt.gz	finngen_R9_CHIRBIL_PRIM.gz	outcome	10620_21_MSMB_PSP_94.txt.gz	Simple mode	93	-0.219957	0.119792	0.069564
10620_21_MSMB_PSP_94.txt.gz	finngen_R9_CHIRBIL_PRIM.gz	outcome	10620_21_MSMB_PSP_94.txt.gz	Weighted mode	93	-0.142946	0.058144	0.015824
10666_7_GNPTG_GNPTG.txt.gz	finngen_R9_CHIRBIL_PRIM.gz	outcome	10666_7_GNPTG_GNPTG.txt.gz	MR Egger	26	-0.24332	0.246225	0.332912
10666_7_GNPTG_GNPTG.txt.gz	finngen_R9_CHIRBIL_PRIM.gz	outcome	10666_7_GNPTG_GNPTG.txt.gz	Weighted median	26	-0.241964	0.215468	0.261449
10666_7_GNPTG_GNPTG.txt.gz	finngen_R9_CHIRBIL_PRIM.gz	outcome	10666_7_GNPTG_GNPTG.txt.gz	Inverse variance weighted	26	-0.31287	0.148806	0.0355068
10666_7_GNPTG_GNPTG.txt.gz	finngen_R9_CHIRBIL_PRIM.gz	outcome	10666_7_GNPTG_GNPTG.txt.gz	Simple mode	26	0.0102342	0.396926	0.979635
10666_7_GNPTG_GNPTG.txt.gz	finngen_R9_CHIRBIL_PRIM.gz	outcome	10666_7_GNPTG_GNPTG.txt.gz	Weighted mode	26	-0.187092	0.198031	0.353823
10672_75_SFTPB_SP_B.txt.gz	finngen_R9_CHIRBIL_PRIM.gz	outcome	10672_75_SFTPB_SP_B.txt.gz	MR Egger	37	-0.0333256	0.187009	0.859591
10672_75_SFTPB_SP_B.txt.gz	finngen_R9_CHIRBIL_PRIM.gz	outcome	10672_75_SFTPB_SP_B.txt.gz	Weighted median	37	-0.0315775	0.144115	0.826561
10672_75_SFTPB_SP_B.txt.gz	finngen_R9_CHIRBIL_PRIM.gz	outcome	10672_75_SFTPB_SP_B.txt.gz	Inverse variance weighted	37	-0.0280451	0.108523	0.796078
10672_75_SFTPB_SP_B.txt.gz	finngen_R9_CHIRBIL_PRIM.gz	outcome	10672_75_SFTPB_SP_B.txt.gz	Simple mode	37	0.362884	0.377896	0.343323
10672_75_SFTPB_SP_B.txt.gz	finngen_R9_CHIRBIL_PRIM.gz	outcome	10672_75_SFTPB_SP_B.txt.gz	Weighted mode	37	-0.0298026	0.146844	0.840313
10708_3_GNRH2_GON2.txt.gz	finngen_R9_CHIRBIL_PRIM.gz	outcome	10708_3_GNRH2_GON2.txt.gz	MR Egger	7	-0.842766	0.637423	0.243372
10708_3_GNRH2_GON2.txt.gz	finngen_R9_CHIRBIL_PRIM.gz	outcome	10708_3_GNRH2_GON2.txt.gz	Weighted median	7	-0.327921	0.355342	0.356096
10708_3_GNRH2_GON2.txt.gz	finngen_R9_CHIRBIL_PRIM.gz	outcome	10708_3_GNRH2_GON2.txt.gz	Inverse variance weighted	7	-0.306358	0.3838	0.424741
10708_3_GNRH2_GON2.txt.gz	finngen_R9_CHIRBIL_PRIM.gz	outcome	10708_3_GNRH2_GON2.txt.gz	Simple mode	7	-0.1138	0.807439	0.89253
10708_3_GNRH2_GON2.txt.gz	finngen_R9_CHIRBIL_PRIM.gz	outcome	10708_3_GNRH2_GON2.txt.gz	Weighted mode	7	-0.353038	0.386009	0.395677
10714_7_ACE_ACE.txt.gz	finngen_R9_CHIRBIL_PRIM.gz	outcome	10714_7_ACE_ACE.txt.gz	MR Egger	85	-0.0123465	0.0994635	0.901512
10714_7_ACE_ACE.txt.gz	finngen_R9_CHIRBIL_PRIM.gz	outcome	10714_7_ACE_ACE.txt.gz	Weighted median	85	-0.0181715	0.0841414	0.829016
10714_7_ACE_ACE.txt.gz	finngen_R9_CHIRBIL_PRIM.gz	outcome	10714_7_ACE_ACE.txt.gz	Inverse variance weighted	85	0.05946	0.0555032	0.284039
10714_7_ACE_ACE.txt.gz	finngen_R9_CHIRBIL_PRIM.gz	outcome	10714_7_ACE_ACE.txt.gz	Simple mode	85	0.177536	0.145115	0.224595
10714_7_ACE_ACE.txt.gz	finngen_R9_CHIRBIL_PRIM.gz	outcome	10714_7_ACE_ACE.txt.gz	Weighted mode	85	0.0280957	0.0745042	0.707049
10722_13_SYK_KSYK.txt.gz	finngen_R9_CHIRBIL_PRIM.gz	outcome	10722_13_SYK_KSYK.txt.gz	MR Egger	4	-3.10226	2.38479	0.323006
10722_13_SYK_KSYK.txt.gz	finngen_R9_CHIRBIL_PRIM.gz	outcome	10722_13_SYK_KSYK.txt.gz	Weighted median	4	-0.775751	0.586582	0.186004
10722_13_SYK_KSYK.txt.gz	finngen_R9_CHIRBIL_PRIM.gz	outcome	10722_13_SYK_KSYK.txt.gz	Inverse variance weighted	4	-0.697909	0.65953	0.289968
10722_13_SYK_KSYK.txt.gz	finngen_R9_CHIRBIL_PRIM.gz	outcome	10722_13_SYK_KSYK.txt.gz	Simple mode	4	-0.865011	0.903807	0.409135
10722_13_SYK_KSYK.txt.gz	finngen_R9_CHIRBIL_PRIM.gz	outcome	10722_13_SYK_KSYK.txt.gz	Weighted mode	4	-0.970417	0.753568	0.288173
10737_96_SERPINB1_Serpin_B1.txt.gz	finngen_R9_CHIRBIL_PRIM.gz	outcome	10737_96_SERPINB1_Serpin_B1.txt.gz	Wald ratio	1	0.180842	0.769745	0.814257
10754_113_PROK2_Prokineticin_2.txt.gz	finngen_R9_CHIRBIL_PRIM.gz	outcome	10754_113_PROK2_Prokineticin_2.txt.gz	MR Egger	74	-0.0472903	0.105495	0.655303
10754_113_PROK2_Prokineticin_2.txt.gz	finngen_R9_CHIRBIL_PRIM.gz	outcome	10754_113_PROK2_Prokineticin_2.txt.gz	Weighted median	74	-0.128488	0.098041	0.190008
10754_113_PROK2_Prokineticin_2.txt.gz	finngen_R9_CHIRBIL_PRIM.gz	outcome	10754_113_PROK2_Prokineticin_2.txt.gz	Inverse variance weighted	74	-0.126713	0.0667981	0.0578341
10754_113_PROK2_Prokineticin_2.txt.gz	finngen_R9_CHIRBIL_PRIM.gz	outcome	10754_113_PROK2_Prokineticin_2.txt.gz	Simple mode	74	-0.0467091	0.202896	0.818571
10754_113_PROK2_Prokineticin_2.txt.gz	finngen_R9_CHIRBIL_PRIM.gz	outcome	10754_113_PROK2_Prokineticin_2.txt.gz	Weighted mode	74	-0.0874543	0.0889259	0.328633
10809_14_KLRB1_KLRB1.txt.gz	finngen_R9_CHIRBIL_PRIM.gz	outcome	10809_14_KLRB1_KLRB1.txt.gz	Inverse variance weighted	2	0.635051	1.38338	0.646194
10815_2_HABP4_HABP4.txt.gz	finngen_R9_CHIRBIL_PRIM.gz	outcome	10815_2_HABP4_HABP4.txt.gz	MR Egger	35	-0.0827699	0.342039	0.810286
10815_2_HABP4_HABP4.txt.gz	finngen_R9_CHIRBIL_PRIM.gz	outcome	10815_2_HABP4_HABP4.txt.gz	Weighted median	35	-0.211322	0.218034	0.332438
10815_2_HABP4_HABP4.txt.gz	finngen_R9_CHIRBIL_PRIM.gz	outcome	10815_2_HABP4_HABP4.txt.gz	Inverse variance weighted	35	-0.0480915	0.150719	0.749665
10815_2_HABP4_HABP4.txt.gz	finngen_R9_CHIRBIL_PRIM.gz	outcome	10815_2_HABP4_HABP4.txt.gz	Simple mode	35	-0.322537	0.333545	0.340373
10815_2_HABP4_HABP4.txt.gz	finngen_R9_CHIRBIL_PRIM.gz	outcome	10815_2_HABP4_HABP4.txt.gz	Weighted mode	35	-0.13154	0.2662	0.624385
10818_36_SMPD1_ASM.txt.gz	finngen_R9_CHIRBIL_PRIM.gz	outcome	10818_36_SMPD1_ASM.txt.gz	MR Egger	43	-0.144934	0.21675	0.507454
10818_36_SMPD1_ASM.txt.gz	finngen_R9_CHIRBIL_PRIM.gz	outcome	10818_36_SMPD1_ASM.txt.gz	Weighted median	43	0.034565	0.18858	0.85457
10818_36_SMPD1_ASM.txt.gz	finngen_R9_CHIRBIL_PRIM.gz	outcome	10818_36_SMPD1_ASM.txt.gz	Inverse variance weighted	43	0.037728	0.121473	0.756113
10818_36_SMPD1_ASM.txt.gz	finngen_R9_CHIRBIL_PRIM.gz	outcome	10818_36_SMPD1_ASM.txt.gz	Simple mode	43	0.0877645	0.361177	0.809191
10818_36_SMPD1_ASM.txt.gz	finngen_R9_CHIRBIL_PRIM.gz	outcome	10818_36_SMPD1_ASM.txt.gz	Weighted mode	43	0.053477	0.178274	0.765679
10833_64_HHIP_HHIP.txt.gz	finngen_R9_CHIRBIL_PRIM.gz	outcome	10833_64_HHIP_HHIP.txt.gz	MR Egger	9	0.32257	0.576801	0.593432
10833_64_HHIP_HHIP.txt.gz	finngen_R9_CHIRBIL_PRIM.gz	outcome	10833_64_HHIP_HHIP.txt.gz	Weighted median	9	0.116276	0.363705	0.749196
10833_64_HHIP_HHIP.txt.gz	finngen_R9_CHIRBIL_PRIM.gz	outcome	10833_64_HHIP_HHIP.txt.gz	Inverse variance weighted	9	-0.0466876	0.28721	0.870868
10833_64_HHIP_HHIP.txt.gz	finngen_R9_CHIRBIL_PRIM.gz	outcome	10833_64_HHIP_HHIP.txt.gz	Simple mode	9	0.153897	0.470275	0.751878
10833_64_HHIP_HHIP.txt.gz	finngen_R9_CHIRBIL_PRIM.gz	outcome	10833_64_HHIP_HHIP.txt.gz	Weighted mode	9	0.19438	0.382996	0.625479
10851_77_EBI3_IL27B.txt.gz	finngen_R9_CHIRBIL_PRIM.gz	outcome	10851_77_EBI3_IL27B.txt.gz	MR Egger	181	-0.15439	0.0711716	0.0313818
10851_77_EBI3_IL27B.txt.gz	finngen_R9_CHIRBIL_PRIM.gz	outcome	10851_77_EBI3_IL27B.txt.gz	Weighted median	181	-0.143988	0.0767714	0.0607184
10851_77_EBI3_IL27B.txt.gz	finngen_R9_CHIRBIL_PRIM.gz	outcome	10851_77_EBI3_IL27B.txt.gz	Inverse variance weighted	181	-0.0902701	0.0458093	0.0487741
10851_77_EBI3_IL27B.txt.gz	finngen_R9_CHIRBIL_PRIM.gz	outcome	10851_77_EBI3_IL27B.txt.gz	Simple mode	181	-0.137719	0.152969	0.36916
10851_77_EBI3_IL27B.txt.gz	finngen_R9_CHIRBIL_PRIM.gz	outcome	10851_77_EBI3_IL27B.txt.gz	Weighted mode	181	-0.137719	0.0767473	0.0744193
10907_116_NTM_NTRI.txt.gz	finngen_R9_CHIRBIL_PRIM.gz	outcome	10907_116_NTM_NTRI.txt.gz	MR Egger	73	-0.307099	0.157905	0.0557565
10907_116_NTM_NTRI.txt.gz	finngen_R9_CHIRBIL_PRIM.gz	outcome	10907_116_NTM_NTRI.txt.gz	Weighted median	73	-0.146446	0.142799	0.305108
10907_116_NTM_NTRI.txt.gz	finngen_R9_CHIRBIL_PRIM.gz	outcome	10907_116_NTM_NTRI.txt.gz	Inverse variance weighted	73	-0.067149	0.0866644	0.438448
10907_116_NTM_NTRI.txt.gz	finngen_R9_CHIRBIL_PRIM.gz	outcome	10907_116_NTM_NTRI.txt.gz	Simple mode	73	-0.00852266	0.263241	0.974262
10907_116_NTM_NTRI.txt.gz	finngen_R9_CHIRBIL_PRIM.gz	outcome	10907_116_NTM_NTRI.txt.gz	Weighted mode	73	-0.181616	0.12991	0.166402
10916_44_PLA2R1_PLA2R.txt.gz	finngen_R9_CHIRBIL_PRIM.gz	outcome	10916_44_PLA2R1_PLA2R.txt.gz	MR Egger	120	0.00925339	0.0747491	0.90169
10916_44_PLA2R1_PLA2R.txt.gz	finngen_R9_CHIRBIL_PRIM.gz	outcome	10916_44_PLA2R1_PLA2R.txt.gz	Weighted median	120	0.111941	0.0631528	0.0763045
10916_44_PLA2R1_PLA2R.txt.gz	finngen_R9_CHIRBIL_PRIM.gz	outcome	10916_44_PLA2R1_PLA2R.txt.gz	Inverse variance weighted	120	0.0618573	0.0388132	0.110999
10916_44_PLA2R1_PLA2R.txt.gz	finngen_R9_CHIRBIL_PRIM.gz	outcome	10916_44_PLA2R1_PLA2R.txt.gz	Simple mode	120	0.247838	0.11006	0.0261664
10916_44_PLA2R1_PLA2R.txt.gz	finngen_R9_CHIRBIL_PRIM.gz	outcome	10916_44_PLA2R1_PLA2R.txt.gz	Weighted mode	120	0.0841349	0.066958	0.211384
10924_258_CYB5D2_NEUFC.txt.gz	finngen_R9_CHIRBIL_PRIM.gz	outcome	10924_258_CYB5D2_NEUFC.txt.gz	MR Egger	14	0.062803	0.263455	0.815607
10924_258_CYB5D2_NEUFC.txt.gz	finngen_R9_CHIRBIL_PRIM.gz	outcome	10924_258_CYB5D2_NEUFC.txt.gz	Weighted median	14	0.0251776	0.208706	0.903979
10924_258_CYB5D2_NEUFC.txt.gz	finngen_R9_CHIRBIL_PRIM.gz	outcome	10924_258_CYB5D2_NEUFC.txt.gz	Inverse variance weighted	14	-0.069668	0.153487	0.649899
10924_258_CYB5D2_NEUFC.txt.gz	finngen_R9_CHIRBIL_PRIM.gz	outcome	10924_258_CYB5D2_NEUFC.txt.gz	Simple mode	14	-0.139231	0.340742	0.689475
10924_258_CYB5D2_NEUFC.txt.gz	finngen_R9_CHIRBIL_PRIM.gz	outcome	10924_258_CYB5D2_NEUFC.txt.gz	Weighted mode	14	0.0799605	0.239145	0.743441
10938_13_CD58_sLFA_3.txt.gz	finngen_R9_CHIRBIL_PRIM.gz	outcome	10938_13_CD58_sLFA_3.txt.gz	MR Egger	4	-0.400613	0.327843	0.346197
10938_13_CD58_sLFA_3.txt.gz	finngen_R9_CHIRBIL_PRIM.gz	outcome	10938_13_CD58_sLFA_3.txt.gz	Weighted median	4	0.166874	0.232432	0.47279
10938_13_CD58_sLFA_3.txt.gz	finngen_R9_CHIRBIL_PRIM.gz	outcome	10938_13_CD58_sLFA_3.txt.gz	Inverse variance weighted	4	0.268442	0.33348	0.420835
10938_13_CD58_sLFA_3.txt.gz	finngen_R9_CHIRBIL_PRIM.gz	outcome	10938_13_CD58_sLFA_3.txt.gz	Simple mode	4	0.527854	0.476188	0.348525
10938_13_CD58_sLFA_3.txt.gz	finngen_R9_CHIRBIL_PRIM.gz	outcome	10938_13_CD58_sLFA_3.txt.gz	Weighted mode	4	0.0543121	0.236016	0.832796
10977_55_UCMA_UCMA.txt.gz	finngen_R9_CHIRBIL_PRIM.gz	outcome	10977_55_UCMA_UCMA.txt.gz	MR Egger	63	-0.305879	0.232871	0.19393
10977_55_UCMA_UCMA.txt.gz	finngen_R9_CHIRBIL_PRIM.gz	outcome	10977_55_UCMA_UCMA.txt.gz	Weighted median	63	-0.0541057	0.144455	0.707995
10977_55_UCMA_UCMA.txt.gz	finngen_R9_CHIRBIL_PRIM.gz	outcome	10977_55_UCMA_UCMA.txt.gz	Inverse variance weighted	63	-0.125468	0.117053	0.283769
10977_55_UCMA_UCMA.txt.gz	finngen_R9_CHIRBIL_PRIM.gz	outcome	10977_55_UCMA_UCMA.txt.gz	Simple mode	63	-0.165016	0.251165	0.513611
10977_55_UCMA_UCMA.txt.gz	finngen_R9_CHIRBIL_PRIM.gz	outcome	10977_55_UCMA_UCMA.txt.gz	Weighted mode	63	-0.0818183	0.159542	0.609891
11102_22_REG4_REG4.txt.gz	finngen_R9_CHIRBIL_PRIM.gz	outcome	11102_22_REG4_REG4.txt.gz	MR Egger	10	-0.292444	0.692518	0.683933
11102_22_REG4_REG4.txt.gz	finngen_R9_CHIRBIL_PRIM.gz	outcome	11102_22_REG4_REG4.txt.gz	Weighted median	10	-0.241793	0.269673	0.369924
11102_22_REG4_REG4.txt.gz	finngen_R9_CHIRBIL_PRIM.gz	outcome	11102_22_REG4_REG4.txt.gz	Inverse variance weighted	10	-0.176469	0.220471	0.423469
11102_22_REG4_REG4.txt.gz	finngen_R9_CHIRBIL_PRIM.gz	outcome	11102_22_REG4_REG4.txt.gz	Simple mode	10	-0.0312168	0.349572	0.930799
11102_22_REG4_REG4.txt.gz	finngen_R9_CHIRBIL_PRIM.gz	outcome	11102_22_REG4_REG4.txt.gz	Weighted mode	10	-0.309832	0.309843	0.343453
11103_24_HSPB1_HSP_27.txt.gz	finngen_R9_CHIRBIL_PRIM.gz	outcome	11103_24_HSPB1_HSP_27.txt.gz	MR Egger	55	0.606349	0.16918	0.000736066
11103_24_HSPB1_HSP_27.txt.gz	finngen_R9_CHIRBIL_PRIM.gz	outcome	11103_24_HSPB1_HSP_27.txt.gz	Weighted median	55	0.486513	0.133614	0.000271403
11103_24_HSPB1_HSP_27.txt.gz	finngen_R9_CHIRBIL_PRIM.gz	outcome	11103_24_HSPB1_HSP_27.txt.gz	Inverse variance weighted	55	0.485996	0.0902466	7.23654e-08
11103_24_HSPB1_HSP_27.txt.gz	finngen_R9_CHIRBIL_PRIM.gz	outcome	11103_24_HSPB1_HSP_27.txt.gz	Simple mode	55	0.868611	0.250519	0.00103958
11103_24_HSPB1_HSP_27.txt.gz	finngen_R9_CHIRBIL_PRIM.gz	outcome	11103_24_HSPB1_HSP_27.txt.gz	Weighted mode	55	0.391704	0.139541	0.00694066
11104_13_CHI3L1_YKL_40.txt.gz	finngen_R9_CHIRBIL_PRIM.gz	outcome	11104_13_CHI3L1_YKL_40.txt.gz	MR Egger	149	0.0428776	0.0768884	0.577924
11104_13_CHI3L1_YKL_40.txt.gz	finngen_R9_CHIRBIL_PRIM.gz	outcome	11104_13_CHI3L1_YKL_40.txt.gz	Weighted median	149	0.00394875	0.0706372	0.95542
11104_13_CHI3L1_YKL_40.txt.gz	finngen_R9_CHIRBIL_PRIM.gz	outcome	11104_13_CHI3L1_YKL_40.txt.gz	Inverse variance weighted	149	-0.0345097	0.0442446	0.435406
11104_13_CHI3L1_YKL_40.txt.gz	finngen_R9_CHIRBIL_PRIM.gz	outcome	11104_13_CHI3L1_YKL_40.txt.gz	Simple mode	149	-0.102831	0.161589	0.525514
11104_13_CHI3L1_YKL_40.txt.gz	finngen_R9_CHIRBIL_PRIM.gz	outcome	11104_13_CHI3L1_YKL_40.txt.gz	Weighted mode	149	-0.04575	0.078532	0.561072
11126_102_TRIO_TRIO.txt.gz	finngen_R9_CHIRBIL_PRIM.gz	outcome	11126_102_TRIO_TRIO.txt.gz	Wald ratio	1	-0.536551	1.39492	0.700499
11140_56_COL1A1_CO1A1.txt.gz	finngen_R9_CHIRBIL_PRIM.gz	outcome	11140_56_COL1A1_CO1A1.txt.gz	MR Egger	8	-0.0172981	0.356319	0.962856
11140_56_COL1A1_CO1A1.txt.gz	finngen_R9_CHIRBIL_PRIM.gz	outcome	11140_56_COL1A1_CO1A1.txt.gz	Weighted median	8	-0.0378984	0.278615	0.891802
11140_56_COL1A1_CO1A1.txt.gz	finngen_R9_CHIRBIL_PRIM.gz	outcome	11140_56_COL1A1_CO1A1.txt.gz	Inverse variance weighted	8	-0.0914599	0.216599	0.672839
11140_56_COL1A1_CO1A1.txt.gz	finngen_R9_CHIRBIL_PRIM.gz	outcome	11140_56_COL1A1_CO1A1.txt.gz	Simple mode	8	-0.173699	0.359988	0.644165
11140_56_COL1A1_CO1A1.txt.gz	finngen_R9_CHIRBIL_PRIM.gz	outcome	11140_56_COL1A1_CO1A1.txt.gz	Weighted mode	8	0.156094	0.334961	0.655363
11142_11_ANGPTL1_ANGL1.txt.gz	finngen_R9_CHIRBIL_PRIM.gz	outcome	11142_11_ANGPTL1_ANGL1.txt.gz	MR Egger	51	0.331014	0.170733	0.0582991
11142_11_ANGPTL1_ANGL1.txt.gz	finngen_R9_CHIRBIL_PRIM.gz	outcome	11142_11_ANGPTL1_ANGL1.txt.gz	Weighted median	51	0.12216	0.137697	0.374988
11142_11_ANGPTL1_ANGL1.txt.gz	finngen_R9_CHIRBIL_PRIM.gz	outcome	11142_11_ANGPTL1_ANGL1.txt.gz	Inverse variance weighted	51	0.109194	0.087473	0.211913
11142_11_ANGPTL1_ANGL1.txt.gz	finngen_R9_CHIRBIL_PRIM.gz	outcome	11142_11_ANGPTL1_ANGL1.txt.gz	Simple mode	51	0.153411	0.25257	0.546334
11142_11_ANGPTL1_ANGL1.txt.gz	finngen_R9_CHIRBIL_PRIM.gz	outcome	11142_11_ANGPTL1_ANGL1.txt.gz	Weighted mode	51	0.195866	0.133897	0.149776
11152_46_KLK13_kallikrein_13.txt.gz	finngen_R9_CHIRBIL_PRIM.gz	outcome	11152_46_KLK13_kallikrein_13.txt.gz	MR Egger	32	0.053936	0.157772	0.734838
11152_46_KLK13_kallikrein_13.txt.gz	finngen_R9_CHIRBIL_PRIM.gz	outcome	11152_46_KLK13_kallikrein_13.txt.gz	Weighted median	32	-0.0297955	0.128977	0.817304
11152_46_KLK13_kallikrein_13.txt.gz	finngen_R9_CHIRBIL_PRIM.gz	outcome	11152_46_KLK13_kallikrein_13.txt.gz	Inverse variance weighted	32	-0.0121344	0.0953097	0.898691
11152_46_KLK13_kallikrein_13.txt.gz	finngen_R9_CHIRBIL_PRIM.gz	outcome	11152_46_KLK13_kallikrein_13.txt.gz	Simple mode	32	0.132714	0.247173	0.595152
11152_46_KLK13_kallikrein_13.txt.gz	finngen_R9_CHIRBIL_PRIM.gz	outcome	11152_46_KLK13_kallikrein_13.txt.gz	Weighted mode	32	-0.0245458	0.12663	0.847567
11192_168_TINAGL1_TINAL.txt.gz	finngen_R9_CHIRBIL_PRIM.gz	outcome	11192_168_TINAGL1_TINAL.txt.gz	MR Egger	3	-2.85253	1.21185	0.255749
11192_168_TINAGL1_TINAL.txt.gz	finngen_R9_CHIRBIL_PRIM.gz	outcome	11192_168_TINAGL1_TINAL.txt.gz	Weighted median	3	-0.899343	0.645471	0.163525
11192_168_TINAGL1_TINAL.txt.gz	finngen_R9_CHIRBIL_PRIM.gz	outcome	11192_168_TINAGL1_TINAL.txt.gz	Inverse variance weighted	3	-0.697357	0.693978	0.314959
11192_168_TINAGL1_TINAL.txt.gz	finngen_R9_CHIRBIL_PRIM.gz	outcome	11192_168_TINAGL1_TINAL.txt.gz	Simple mode	3	-1.04002	0.830879	0.337225
11192_168_TINAGL1_TINAL.txt.gz	finngen_R9_CHIRBIL_PRIM.gz	outcome	11192_168_TINAGL1_TINAL.txt.gz	Weighted mode	3	-1.07274	0.774162	0.300134
11196_31_COL6A3_Collagen_alpha_3_VI_.txt.gz	finngen_R9_CHIRBIL_PRIM.gz	outcome	11196_31_COL6A3_Collagen_alpha_3_VI_.txt.gz	MR Egger	3	0.0574457	4.4164	0.99172
11196_31_COL6A3_Collagen_alpha_3_VI_.txt.gz	finngen_R9_CHIRBIL_PRIM.gz	outcome	11196_31_COL6A3_Collagen_alpha_3_VI_.txt.gz	Weighted median	3	-0.566847	0.759147	0.455251
11196_31_COL6A3_Collagen_alpha_3_VI_.txt.gz	finngen_R9_CHIRBIL_PRIM.gz	outcome	11196_31_COL6A3_Collagen_alpha_3_VI_.txt.gz	Inverse variance weighted	3	-0.184448	0.645246	0.774987
11196_31_COL6A3_Collagen_alpha_3_VI_.txt.gz	finngen_R9_CHIRBIL_PRIM.gz	outcome	11196_31_COL6A3_Collagen_alpha_3_VI_.txt.gz	Simple mode	3	-0.571641	0.939559	0.604807
11196_31_COL6A3_Collagen_alpha_3_VI_.txt.gz	finngen_R9_CHIRBIL_PRIM.gz	outcome	11196_31_COL6A3_Collagen_alpha_3_VI_.txt.gz	Weighted mode	3	-0.575267	0.865101	0.574487
11219_95_FGFBP3_FGFP3.txt.gz	finngen_R9_CHIRBIL_PRIM.gz	outcome	11219_95_FGFBP3_FGFP3.txt.gz	MR Egger	27	-0.00526555	0.411815	0.9899
11219_95_FGFBP3_FGFP3.txt.gz	finngen_R9_CHIRBIL_PRIM.gz	outcome	11219_95_FGFBP3_FGFP3.txt.gz	Weighted median	27	0.0337735	0.244017	0.889919
11219_95_FGFBP3_FGFP3.txt.gz	finngen_R9_CHIRBIL_PRIM.gz	outcome	11219_95_FGFBP3_FGFP3.txt.gz	Inverse variance weighted	27	0.151403	0.20286	0.455461
11219_95_FGFBP3_FGFP3.txt.gz	finngen_R9_CHIRBIL_PRIM.gz	outcome	11219_95_FGFBP3_FGFP3.txt.gz	Simple mode	27	0.201795	0.454229	0.660532
11219_95_FGFBP3_FGFP3.txt.gz	finngen_R9_CHIRBIL_PRIM.gz	outcome	11219_95_FGFBP3_FGFP3.txt.gz	Weighted mode	27	0.102299	0.354007	0.774893
11237_49_PCOLCE_PCOC1.txt.gz	finngen_R9_CHIRBIL_PRIM.gz	outcome	11237_49_PCOLCE_PCOC1.txt.gz	MR Egger	15	-0.403759	0.527876	0.458007
11237_49_PCOLCE_PCOC1.txt.gz	finngen_R9_CHIRBIL_PRIM.gz	outcome	11237_49_PCOLCE_PCOC1.txt.gz	Weighted median	15	-0.330648	0.306687	0.280977
11237_49_PCOLCE_PCOC1.txt.gz	finngen_R9_CHIRBIL_PRIM.gz	outcome	11237_49_PCOLCE_PCOC1.txt.gz	Inverse variance weighted	15	-0.267091	0.232524	0.250697
11237_49_PCOLCE_PCOC1.txt.gz	finngen_R9_CHIRBIL_PRIM.gz	outcome	11237_49_PCOLCE_PCOC1.txt.gz	Simple mode	15	-0.713152	0.509045	0.183001
11237_49_PCOLCE_PCOC1.txt.gz	finngen_R9_CHIRBIL_PRIM.gz	outcome	11237_49_PCOLCE_PCOC1.txt.gz	Weighted mode	15	-0.46685	0.30369	0.146519
11257_1_QDPR_DHPR.txt.gz	finngen_R9_CHIRBIL_PRIM.gz	outcome	11257_1_QDPR_DHPR.txt.gz	MR Egger	36	0.125673	0.202774	0.539542
11257_1_QDPR_DHPR.txt.gz	finngen_R9_CHIRBIL_PRIM.gz	outcome	11257_1_QDPR_DHPR.txt.gz	Weighted median	36	-0.00466197	0.163703	0.977281
11257_1_QDPR_DHPR.txt.gz	finngen_R9_CHIRBIL_PRIM.gz	outcome	11257_1_QDPR_DHPR.txt.gz	Inverse variance weighted	36	0.137558	0.114888	0.231182
11257_1_QDPR_DHPR.txt.gz	finngen_R9_CHIRBIL_PRIM.gz	outcome	11257_1_QDPR_DHPR.txt.gz	Simple mode	36	0.421409	0.368357	0.260378
11257_1_QDPR_DHPR.txt.gz	finngen_R9_CHIRBIL_PRIM.gz	outcome	11257_1_QDPR_DHPR.txt.gz	Weighted mode	36	0.0424567	0.147206	0.774729
11265_8_ALDH1A1_Retinal_dehydrogenase_1.txt.gz	finngen_R9_CHIRBIL_PRIM.gz	outcome	11265_8_ALDH1A1_Retinal_dehydrogenase_1.txt.gz	MR Egger	5	1.35372	1.40325	0.405855
11265_8_ALDH1A1_Retinal_dehydrogenase_1.txt.gz	finngen_R9_CHIRBIL_PRIM.gz	outcome	11265_8_ALDH1A1_Retinal_dehydrogenase_1.txt.gz	Weighted median	5	1.16195	0.548607	0.0341748
11265_8_ALDH1A1_Retinal_dehydrogenase_1.txt.gz	finngen_R9_CHIRBIL_PRIM.gz	outcome	11265_8_ALDH1A1_Retinal_dehydrogenase_1.txt.gz	Inverse variance weighted	5	1.16939	0.479829	0.0148057
11265_8_ALDH1A1_Retinal_dehydrogenase_1.txt.gz	finngen_R9_CHIRBIL_PRIM.gz	outcome	11265_8_ALDH1A1_Retinal_dehydrogenase_1.txt.gz	Simple mode	5	1.14999	0.790897	0.219614
11265_8_ALDH1A1_Retinal_dehydrogenase_1.txt.gz	finngen_R9_CHIRBIL_PRIM.gz	outcome	11265_8_ALDH1A1_Retinal_dehydrogenase_1.txt.gz	Weighted mode	5	1.15847	0.692541	0.169686
11266_8_SELPLG_SELPL.txt.gz	finngen_R9_CHIRBIL_PRIM.gz	outcome	11266_8_SELPLG_SELPL.txt.gz	MR Egger	32	0.17776	0.219233	0.42385
11266_8_SELPLG_SELPL.txt.gz	finngen_R9_CHIRBIL_PRIM.gz	outcome	11266_8_SELPLG_SELPL.txt.gz	Weighted median	32	0.342512	0.188523	0.0692453
11266_8_SELPLG_SELPL.txt.gz	finngen_R9_CHIRBIL_PRIM.gz	outcome	11266_8_SELPLG_SELPL.txt.gz	Inverse variance weighted	32	0.395464	0.126131	0.00171661
11266_8_SELPLG_SELPL.txt.gz	finngen_R9_CHIRBIL_PRIM.gz	outcome	11266_8_SELPLG_SELPL.txt.gz	Simple mode	32	0.513567	0.326605	0.126001
11266_8_SELPLG_SELPL.txt.gz	finngen_R9_CHIRBIL_PRIM.gz	outcome	11266_8_SELPLG_SELPL.txt.gz	Weighted mode	32	0.337978	0.176151	0.0642736
11273_176_GSTT2B_GSTT2.txt.gz	finngen_R9_CHIRBIL_PRIM.gz	outcome	11273_176_GSTT2B_GSTT2.txt.gz	MR Egger	23	0.349456	0.262603	0.197545
11273_176_GSTT2B_GSTT2.txt.gz	finngen_R9_CHIRBIL_PRIM.gz	outcome	11273_176_GSTT2B_GSTT2.txt.gz	Weighted median	23	0.132243	0.208811	0.526529
11273_176_GSTT2B_GSTT2.txt.gz	finngen_R9_CHIRBIL_PRIM.gz	outcome	11273_176_GSTT2B_GSTT2.txt.gz	Inverse variance weighted	23	0.0357653	0.155371	0.817942
11273_176_GSTT2B_GSTT2.txt.gz	finngen_R9_CHIRBIL_PRIM.gz	outcome	11273_176_GSTT2B_GSTT2.txt.gz	Simple mode	23	0.515268	0.352298	0.157719
11273_176_GSTT2B_GSTT2.txt.gz	finngen_R9_CHIRBIL_PRIM.gz	outcome	11273_176_GSTT2B_GSTT2.txt.gz	Weighted mode	23	0.122792	0.198677	0.54289
11302_237_TNR_TENR.txt.gz	finngen_R9_CHIRBIL_PRIM.gz	outcome	11302_237_TNR_TENR.txt.gz	MR Egger	5	-0.105096	1.01478	0.924049
11302_237_TNR_TENR.txt.gz	finngen_R9_CHIRBIL_PRIM.gz	outcome	11302_237_TNR_TENR.txt.gz	Weighted median	5	-0.411487	0.380194	0.279115
11302_237_TNR_TENR.txt.gz	finngen_R9_CHIRBIL_PRIM.gz	outcome	11302_237_TNR_TENR.txt.gz	Inverse variance weighted	5	-0.493815	0.33847	0.144575
11302_237_TNR_TENR.txt.gz	finngen_R9_CHIRBIL_PRIM.gz	outcome	11302_237_TNR_TENR.txt.gz	Simple mode	5	-0.519417	0.63049	0.456321
11302_237_TNR_TENR.txt.gz	finngen_R9_CHIRBIL_PRIM.gz	outcome	11302_237_TNR_TENR.txt.gz	Weighted mode	5	-0.25348	0.43328	0.589942
11360_39_RRM1_RRM1.txt.gz	finngen_R9_CHIRBIL_PRIM.gz	outcome	11360_39_RRM1_RRM1.txt.gz	Wald ratio	1	0.375167	1.1016	0.73343
11369_23_ADH5_ADHX.txt.gz	finngen_R9_CHIRBIL_PRIM.gz	outcome	11369_23_ADH5_ADHX.txt.gz	MR Egger	15	0.143387	0.471488	0.765853
11369_23_ADH5_ADHX.txt.gz	finngen_R9_CHIRBIL_PRIM.gz	outcome	11369_23_ADH5_ADHX.txt.gz	Weighted median	15	0.295319	0.309231	0.339571
11369_23_ADH5_ADHX.txt.gz	finngen_R9_CHIRBIL_PRIM.gz	outcome	11369_23_ADH5_ADHX.txt.gz	Inverse variance weighted	15	0.154536	0.233809	0.508644
11369_23_ADH5_ADHX.txt.gz	finngen_R9_CHIRBIL_PRIM.gz	outcome	11369_23_ADH5_ADHX.txt.gz	Simple mode	15	0.300696	0.45803	0.522149
11369_23_ADH5_ADHX.txt.gz	finngen_R9_CHIRBIL_PRIM.gz	outcome	11369_23_ADH5_ADHX.txt.gz	Weighted mode	15	0.339479	0.390371	0.399166
11377_19_ADH7_ADH7.txt.gz	finngen_R9_CHIRBIL_PRIM.gz	outcome	11377_19_ADH7_ADH7.txt.gz	MR Egger	29	0.2591	0.258137	0.324421
11377_19_ADH7_ADH7.txt.gz	finngen_R9_CHIRBIL_PRIM.gz	outcome	11377_19_ADH7_ADH7.txt.gz	Weighted median	29	0.280523	0.199973	0.160677
11377_19_ADH7_ADH7.txt.gz	finngen_R9_CHIRBIL_PRIM.gz	outcome	11377_19_ADH7_ADH7.txt.gz	Inverse variance weighted	29	0.43809	0.1551	0.00473437
11377_19_ADH7_ADH7.txt.gz	finngen_R9_CHIRBIL_PRIM.gz	outcome	11377_19_ADH7_ADH7.txt.gz	Simple mode	29	0.858259	0.488033	0.0895709
11377_19_ADH7_ADH7.txt.gz	finngen_R9_CHIRBIL_PRIM.gz	outcome	11377_19_ADH7_ADH7.txt.gz	Weighted mode	29	0.216293	0.206805	0.304561
11378_37_SYK_KSYK.txt.gz	finngen_R9_CHIRBIL_PRIM.gz	outcome	11378_37_SYK_KSYK.txt.gz	MR Egger	6	0.22521	1.14803	0.854039
11378_37_SYK_KSYK.txt.gz	finngen_R9_CHIRBIL_PRIM.gz	outcome	11378_37_SYK_KSYK.txt.gz	Weighted median	6	-1.19379	0.53443	0.0254981
11378_37_SYK_KSYK.txt.gz	finngen_R9_CHIRBIL_PRIM.gz	outcome	11378_37_SYK_KSYK.txt.gz	Inverse variance weighted	6	-1.25272	0.448033	0.00517323
11378_37_SYK_KSYK.txt.gz	finngen_R9_CHIRBIL_PRIM.gz	outcome	11378_37_SYK_KSYK.txt.gz	Simple mode	6	-1.31641	0.735167	0.133358
11378_37_SYK_KSYK.txt.gz	finngen_R9_CHIRBIL_PRIM.gz	outcome	11378_37_SYK_KSYK.txt.gz	Weighted mode	6	-1.38518	0.666028	0.0920904
11388_75_WFDC2_HE4.txt.gz	finngen_R9_CHIRBIL_PRIM.gz	outcome	11388_75_WFDC2_HE4.txt.gz	Inverse variance weighted	2	-1.8989	0.716919	0.00808018
11390_24_CA8_Carbonic_Anhydrase_VIII.txt.gz	finngen_R9_CHIRBIL_PRIM.gz	outcome	11390_24_CA8_Carbonic_Anhydrase_VIII.txt.gz	MR Egger	55	-0.230967	0.149616	0.128604
11390_24_CA8_Carbonic_Anhydrase_VIII.txt.gz	finngen_R9_CHIRBIL_PRIM.gz	outcome	11390_24_CA8_Carbonic_Anhydrase_VIII.txt.gz	Weighted median	55	0.0129718	0.131737	0.921561
11390_24_CA8_Carbonic_Anhydrase_VIII.txt.gz	finngen_R9_CHIRBIL_PRIM.gz	outcome	11390_24_CA8_Carbonic_Anhydrase_VIII.txt.gz	Inverse variance weighted	55	-0.0179903	0.082211	0.826782
11390_24_CA8_Carbonic_Anhydrase_VIII.txt.gz	finngen_R9_CHIRBIL_PRIM.gz	outcome	11390_24_CA8_Carbonic_Anhydrase_VIII.txt.gz	Simple mode	55	-0.266653	0.229102	0.249579
11390_24_CA8_Carbonic_Anhydrase_VIII.txt.gz	finngen_R9_CHIRBIL_PRIM.gz	outcome	11390_24_CA8_Carbonic_Anhydrase_VIII.txt.gz	Weighted mode	55	-0.0934524	0.123558	0.45273
11431_235_RECQL_RECQ1.txt.gz	finngen_R9_CHIRBIL_PRIM.gz	outcome	11431_235_RECQL_RECQ1.txt.gz	MR Egger	34	0.260782	0.230445	0.266192
11431_235_RECQL_RECQ1.txt.gz	finngen_R9_CHIRBIL_PRIM.gz	outcome	11431_235_RECQL_RECQ1.txt.gz	Weighted median	34	0.0423024	0.202488	0.834516
11431_235_RECQL_RECQ1.txt.gz	finngen_R9_CHIRBIL_PRIM.gz	outcome	11431_235_RECQL_RECQ1.txt.gz	Inverse variance weighted	34	0.191146	0.145151	0.187878
11431_235_RECQL_RECQ1.txt.gz	finngen_R9_CHIRBIL_PRIM.gz	outcome	11431_235_RECQL_RECQ1.txt.gz	Simple mode	34	-0.0364085	0.45573	0.936807
11431_235_RECQL_RECQ1.txt.gz	finngen_R9_CHIRBIL_PRIM.gz	outcome	11431_235_RECQL_RECQ1.txt.gz	Weighted mode	34	-0.0480053	0.429195	0.91162
11441_11_PYGL_PYGL.txt.gz	finngen_R9_CHIRBIL_PRIM.gz	outcome	11441_11_PYGL_PYGL.txt.gz	MR Egger	3	-0.814382	1.19641	0.619525
11441_11_PYGL_PYGL.txt.gz	finngen_R9_CHIRBIL_PRIM.gz	outcome	11441_11_PYGL_PYGL.txt.gz	Weighted median	3	-0.377667	0.436004	0.38638
11441_11_PYGL_PYGL.txt.gz	finngen_R9_CHIRBIL_PRIM.gz	outcome	11441_11_PYGL_PYGL.txt.gz	Inverse variance weighted	3	-0.209695	0.415063	0.61341
11441_11_PYGL_PYGL.txt.gz	finngen_R9_CHIRBIL_PRIM.gz	outcome	11441_11_PYGL_PYGL.txt.gz	Simple mode	3	-0.512479	0.53431	0.4387
11441_11_PYGL_PYGL.txt.gz	finngen_R9_CHIRBIL_PRIM.gz	outcome	11441_11_PYGL_PYGL.txt.gz	Weighted mode	3	-0.43532	0.4901	0.468133
11480_1_ALDH3A1_Aldehyde_dehydrogenase__class_3.txt.gz	finngen_R9_CHIRBIL_PRIM.gz	outcome	11480_1_ALDH3A1_Aldehyde_dehydrogenase__class_3.txt.gz	MR Egger	3	0.00734482	1.40035	0.996661
11480_1_ALDH3A1_Aldehyde_dehydrogenase__class_3.txt.gz	finngen_R9_CHIRBIL_PRIM.gz	outcome	11480_1_ALDH3A1_Aldehyde_dehydrogenase__class_3.txt.gz	Weighted median	3	0.0232883	0.469831	0.960467
11480_1_ALDH3A1_Aldehyde_dehydrogenase__class_3.txt.gz	finngen_R9_CHIRBIL_PRIM.gz	outcome	11480_1_ALDH3A1_Aldehyde_dehydrogenase__class_3.txt.gz	Inverse variance weighted	3	0.0250144	0.434277	0.954067
11480_1_ALDH3A1_Aldehyde_dehydrogenase__class_3.txt.gz	finngen_R9_CHIRBIL_PRIM.gz	outcome	11480_1_ALDH3A1_Aldehyde_dehydrogenase__class_3.txt.gz	Simple mode	3	-0.0414265	0.656203	0.955404
11480_1_ALDH3A1_Aldehyde_dehydrogenase__class_3.txt.gz	finngen_R9_CHIRBIL_PRIM.gz	outcome	11480_1_ALDH3A1_Aldehyde_dehydrogenase__class_3.txt.gz	Weighted mode	3	0.00807139	0.510626	0.988824
11510_31_APOL1_Apo_L1.txt.gz	finngen_R9_CHIRBIL_PRIM.gz	outcome	11510_31_APOL1_Apo_L1.txt.gz	MR Egger	34	-0.0542941	0.194577	0.782012
11510_31_APOL1_Apo_L1.txt.gz	finngen_R9_CHIRBIL_PRIM.gz	outcome	11510_31_APOL1_Apo_L1.txt.gz	Weighted median	34	-0.246385	0.160316	0.124324
11510_31_APOL1_Apo_L1.txt.gz	finngen_R9_CHIRBIL_PRIM.gz	outcome	11510_31_APOL1_Apo_L1.txt.gz	Inverse variance weighted	34	-0.0796476	0.118225	0.500504
11510_31_APOL1_Apo_L1.txt.gz	finngen_R9_CHIRBIL_PRIM.gz	outcome	11510_31_APOL1_Apo_L1.txt.gz	Simple mode	34	-0.00330266	0.285159	0.990829
11510_31_APOL1_Apo_L1.txt.gz	finngen_R9_CHIRBIL_PRIM.gz	outcome	11510_31_APOL1_Apo_L1.txt.gz	Weighted mode	34	-0.141654	0.157843	0.375987
11514_196_CD59_CD59.txt.gz	finngen_R9_CHIRBIL_PRIM.gz	outcome	11514_196_CD59_CD59.txt.gz	MR Egger	8	0.0453628	0.514858	0.932658
11514_196_CD59_CD59.txt.gz	finngen_R9_CHIRBIL_PRIM.gz	outcome	11514_196_CD59_CD59.txt.gz	Weighted median	8	-0.310928	0.285014	0.275308
11514_196_CD59_CD59.txt.gz	finngen_R9_CHIRBIL_PRIM.gz	outcome	11514_196_CD59_CD59.txt.gz	Inverse variance weighted	8	-0.401715	0.236081	0.0888307
11514_196_CD59_CD59.txt.gz	finngen_R9_CHIRBIL_PRIM.gz	outcome	11514_196_CD59_CD59.txt.gz	Simple mode	8	-0.395277	0.445857	0.404746
11514_196_CD59_CD59.txt.gz	finngen_R9_CHIRBIL_PRIM.gz	outcome	11514_196_CD59_CD59.txt.gz	Weighted mode	8	-0.280462	0.272639	0.337852
11516_7_FABP1_FABPL.txt.gz	finngen_R9_CHIRBIL_PRIM.gz	outcome	11516_7_FABP1_FABPL.txt.gz	Wald ratio	1	-0.308676	0.549768	0.57448
11531_24_C10orf54_GI24.txt.gz	finngen_R9_CHIRBIL_PRIM.gz	outcome	11531_24_C10orf54_GI24.txt.gz	MR Egger	26	0.710879	0.3595	0.0595899
11531_24_C10orf54_GI24.txt.gz	finngen_R9_CHIRBIL_PRIM.gz	outcome	11531_24_C10orf54_GI24.txt.gz	Weighted median	26	0.221208	0.214149	0.301621
11531_24_C10orf54_GI24.txt.gz	finngen_R9_CHIRBIL_PRIM.gz	outcome	11531_24_C10orf54_GI24.txt.gz	Inverse variance weighted	26	0.420499	0.183437	0.0218864
11531_24_C10orf54_GI24.txt.gz	finngen_R9_CHIRBIL_PRIM.gz	outcome	11531_24_C10orf54_GI24.txt.gz	Simple mode	26	0.776408	0.507094	0.138303
11531_24_C10orf54_GI24.txt.gz	finngen_R9_CHIRBIL_PRIM.gz	outcome	11531_24_C10orf54_GI24.txt.gz	Weighted mode	26	0.366074	0.217674	0.105068
11547_84_MUSK_MUSK.txt.gz	finngen_R9_CHIRBIL_PRIM.gz	outcome	11547_84_MUSK_MUSK.txt.gz	Inverse variance weighted	2	0.375283	1.08996	0.730614
11568_2_FKBP1B_FKB1B.txt.gz	finngen_R9_CHIRBIL_PRIM.gz	outcome	11568_2_FKBP1B_FKB1B.txt.gz	MR Egger	17	-0.220069	0.356403	0.546183
11568_2_FKBP1B_FKB1B.txt.gz	finngen_R9_CHIRBIL_PRIM.gz	outcome	11568_2_FKBP1B_FKB1B.txt.gz	Weighted median	17	-0.215045	0.220092	0.328534
11568_2_FKBP1B_FKB1B.txt.gz	finngen_R9_CHIRBIL_PRIM.gz	outcome	11568_2_FKBP1B_FKB1B.txt.gz	Inverse variance weighted	17	-0.152782	0.172541	0.375896
11568_2_FKBP1B_FKB1B.txt.gz	finngen_R9_CHIRBIL_PRIM.gz	outcome	11568_2_FKBP1B_FKB1B.txt.gz	Simple mode	17	-0.368068	0.336733	0.290553
11568_2_FKBP1B_FKB1B.txt.gz	finngen_R9_CHIRBIL_PRIM.gz	outcome	11568_2_FKBP1B_FKB1B.txt.gz	Weighted mode	17	-0.231827	0.233895	0.336362
11646_4_CHST9_Carbohydrate_sulfotransferase_9.txt.gz	finngen_R9_CHIRBIL_PRIM.gz	outcome	11646_4_CHST9_Carbohydrate_sulfotransferase_9.txt.gz	MR Egger	30	-0.0787906	0.332841	0.814596
11646_4_CHST9_Carbohydrate_sulfotransferase_9.txt.gz	finngen_R9_CHIRBIL_PRIM.gz	outcome	11646_4_CHST9_Carbohydrate_sulfotransferase_9.txt.gz	Weighted median	30	-0.356876	0.207693	0.0857449
11646_4_CHST9_Carbohydrate_sulfotransferase_9.txt.gz	finngen_R9_CHIRBIL_PRIM.gz	outcome	11646_4_CHST9_Carbohydrate_sulfotransferase_9.txt.gz	Inverse variance weighted	30	-0.206578	0.143534	0.150085
11646_4_CHST9_Carbohydrate_sulfotransferase_9.txt.gz	finngen_R9_CHIRBIL_PRIM.gz	outcome	11646_4_CHST9_Carbohydrate_sulfotransferase_9.txt.gz	Simple mode	30	-0.335778	0.328493	0.315149
11646_4_CHST9_Carbohydrate_sulfotransferase_9.txt.gz	finngen_R9_CHIRBIL_PRIM.gz	outcome	11646_4_CHST9_Carbohydrate_sulfotransferase_9.txt.gz	Weighted mode	30	-0.335778	0.206543	0.114832
11708_2_LCN1_LCN1.txt.gz	finngen_R9_CHIRBIL_PRIM.gz	outcome	11708_2_LCN1_LCN1.txt.gz	Wald ratio	1	-0.902145	0.947605	0.341084
12008_3_CD7_CD7.txt.gz	finngen_R9_CHIRBIL_PRIM.gz	outcome	12008_3_CD7_CD7.txt.gz	MR Egger	12	-0.246715	0.543497	0.659565
12008_3_CD7_CD7.txt.gz	finngen_R9_CHIRBIL_PRIM.gz	outcome	12008_3_CD7_CD7.txt.gz	Weighted median	12	-0.292253	0.290256	0.313992
12008_3_CD7_CD7.txt.gz	finngen_R9_CHIRBIL_PRIM.gz	outcome	12008_3_CD7_CD7.txt.gz	Inverse variance weighted	12	-0.233082	0.311479	0.454274
12008_3_CD7_CD7.txt.gz	finngen_R9_CHIRBIL_PRIM.gz	outcome	12008_3_CD7_CD7.txt.gz	Simple mode	12	-0.418564	0.400911	0.318872
12008_3_CD7_CD7.txt.gz	finngen_R9_CHIRBIL_PRIM.gz	outcome	12008_3_CD7_CD7.txt.gz	Weighted mode	12	-0.265208	0.280564	0.364823
12329_21_RPS6KA1_KS6A1.txt.gz	finngen_R9_CHIRBIL_PRIM.gz	outcome	12329_21_RPS6KA1_KS6A1.txt.gz	MR Egger	4	4.31283	2.21453	0.190837
12329_21_RPS6KA1_KS6A1.txt.gz	finngen_R9_CHIRBIL_PRIM.gz	outcome	12329_21_RPS6KA1_KS6A1.txt.gz	Weighted median	4	0.0145333	0.581991	0.980078
12329_21_RPS6KA1_KS6A1.txt.gz	finngen_R9_CHIRBIL_PRIM.gz	outcome	12329_21_RPS6KA1_KS6A1.txt.gz	Inverse variance weighted	4	0.302711	0.653764	0.643344
12329_21_RPS6KA1_KS6A1.txt.gz	finngen_R9_CHIRBIL_PRIM.gz	outcome	12329_21_RPS6KA1_KS6A1.txt.gz	Simple mode	4	-0.866424	1.07379	0.478773
12329_21_RPS6KA1_KS6A1.txt.gz	finngen_R9_CHIRBIL_PRIM.gz	outcome	12329_21_RPS6KA1_KS6A1.txt.gz	Weighted mode	4	1.38436	0.638221	0.118557
12338_27_EGFLAM_EGFLA.txt.gz	finngen_R9_CHIRBIL_PRIM.gz	outcome	12338_27_EGFLAM_EGFLA.txt.gz	MR Egger	16	-0.269518	0.307308	0.395272
12338_27_EGFLAM_EGFLA.txt.gz	finngen_R9_CHIRBIL_PRIM.gz	outcome	12338_27_EGFLAM_EGFLA.txt.gz	Weighted median	16	-0.395996	0.258609	0.125707
12338_27_EGFLAM_EGFLA.txt.gz	finngen_R9_CHIRBIL_PRIM.gz	outcome	12338_27_EGFLAM_EGFLA.txt.gz	Inverse variance weighted	16	-0.171291	0.185442	0.355649
12338_27_EGFLAM_EGFLA.txt.gz	finngen_R9_CHIRBIL_PRIM.gz	outcome	12338_27_EGFLAM_EGFLA.txt.gz	Simple mode	16	-0.270447	0.415305	0.524768
12338_27_EGFLAM_EGFLA.txt.gz	finngen_R9_CHIRBIL_PRIM.gz	outcome	12338_27_EGFLAM_EGFLA.txt.gz	Weighted mode	16	-0.382785	0.281506	0.193991
12357_41_SNAP29_SNP29.txt.gz	finngen_R9_CHIRBIL_PRIM.gz	outcome	12357_41_SNAP29_SNP29.txt.gz	Inverse variance weighted	2	1.12095	0.626548	0.0736005
12370_30_APOF_Apo_F.txt.gz	finngen_R9_CHIRBIL_PRIM.gz	outcome	12370_30_APOF_Apo_F.txt.gz	MR Egger	16	0.102481	0.471098	0.83093
12370_30_APOF_Apo_F.txt.gz	finngen_R9_CHIRBIL_PRIM.gz	outcome	12370_30_APOF_Apo_F.txt.gz	Weighted median	16	-0.462591	0.341184	0.17515
12370_30_APOF_Apo_F.txt.gz	finngen_R9_CHIRBIL_PRIM.gz	outcome	12370_30_APOF_Apo_F.txt.gz	Inverse variance weighted	16	-0.25134	0.268981	0.350089
12370_30_APOF_Apo_F.txt.gz	finngen_R9_CHIRBIL_PRIM.gz	outcome	12370_30_APOF_Apo_F.txt.gz	Simple mode	16	-0.430735	0.562358	0.455594
12370_30_APOF_Apo_F.txt.gz	finngen_R9_CHIRBIL_PRIM.gz	outcome	12370_30_APOF_Apo_F.txt.gz	Weighted mode	16	-0.446374	0.375915	0.25352
12381_26_CBR1_CBR1.txt.gz	finngen_R9_CHIRBIL_PRIM.gz	outcome	12381_26_CBR1_CBR1.txt.gz	MR Egger	18	0.491959	0.376302	0.20957
12381_26_CBR1_CBR1.txt.gz	finngen_R9_CHIRBIL_PRIM.gz	outcome	12381_26_CBR1_CBR1.txt.gz	Weighted median	18	0.510138	0.284611	0.0730677
12381_26_CBR1_CBR1.txt.gz	finngen_R9_CHIRBIL_PRIM.gz	outcome	12381_26_CBR1_CBR1.txt.gz	Inverse variance weighted	18	0.525885	0.209212	0.0119492
12381_26_CBR1_CBR1.txt.gz	finngen_R9_CHIRBIL_PRIM.gz	outcome	12381_26_CBR1_CBR1.txt.gz	Simple mode	18	0.56136	0.450801	0.229931
12381_26_CBR1_CBR1.txt.gz	finngen_R9_CHIRBIL_PRIM.gz	outcome	12381_26_CBR1_CBR1.txt.gz	Weighted mode	18	0.579475	0.302526	0.0724113
12386_11_RNPEP_AMPB.txt.gz	finngen_R9_CHIRBIL_PRIM.gz	outcome	12386_11_RNPEP_AMPB.txt.gz	MR Egger	53	-0.173092	0.179286	0.338876
12386_11_RNPEP_AMPB.txt.gz	finngen_R9_CHIRBIL_PRIM.gz	outcome	12386_11_RNPEP_AMPB.txt.gz	Weighted median	53	-0.109289	0.140675	0.437223
12386_11_RNPEP_AMPB.txt.gz	finngen_R9_CHIRBIL_PRIM.gz	outcome	12386_11_RNPEP_AMPB.txt.gz	Inverse variance weighted	53	0.0307044	0.0980911	0.754266
12386_11_RNPEP_AMPB.txt.gz	finngen_R9_CHIRBIL_PRIM.gz	outcome	12386_11_RNPEP_AMPB.txt.gz	Simple mode	53	-0.123648	0.284805	0.665975
12386_11_RNPEP_AMPB.txt.gz	finngen_R9_CHIRBIL_PRIM.gz	outcome	12386_11_RNPEP_AMPB.txt.gz	Weighted mode	53	-0.170322	0.148704	0.257297
12422_143_ALOX15B_LX15B.txt.gz	finngen_R9_CHIRBIL_PRIM.gz	outcome	12422_143_ALOX15B_LX15B.txt.gz	Wald ratio	1	0.566297	0.896953	0.527807
12436_84_GSTO1_GST_omega_1.txt.gz	finngen_R9_CHIRBIL_PRIM.gz	outcome	12436_84_GSTO1_GST_omega_1.txt.gz	MR Egger	112	0.0511442	0.0811001	0.52959
12436_84_GSTO1_GST_omega_1.txt.gz	finngen_R9_CHIRBIL_PRIM.gz	outcome	12436_84_GSTO1_GST_omega_1.txt.gz	Weighted median	112	0.0135846	0.0763302	0.858745
12436_84_GSTO1_GST_omega_1.txt.gz	finngen_R9_CHIRBIL_PRIM.gz	outcome	12436_84_GSTO1_GST_omega_1.txt.gz	Inverse variance weighted	112	0.0941781	0.0456828	0.039249
12436_84_GSTO1_GST_omega_1.txt.gz	finngen_R9_CHIRBIL_PRIM.gz	outcome	12436_84_GSTO1_GST_omega_1.txt.gz	Simple mode	112	-0.0118	0.136922	0.931478
12436_84_GSTO1_GST_omega_1.txt.gz	finngen_R9_CHIRBIL_PRIM.gz	outcome	12436_84_GSTO1_GST_omega_1.txt.gz	Weighted mode	112	0.0238159	0.0707956	0.737202
12437_18_ULK3_ULK3.txt.gz	finngen_R9_CHIRBIL_PRIM.gz	outcome	12437_18_ULK3_ULK3.txt.gz	Wald ratio	1	-0.542548	0.741474	0.464343
12449_16_PPIH_PPIH.txt.gz	finngen_R9_CHIRBIL_PRIM.gz	outcome	12449_16_PPIH_PPIH.txt.gz	MR Egger	3	2.16529	5.86463	0.774836
12449_16_PPIH_PPIH.txt.gz	finngen_R9_CHIRBIL_PRIM.gz	outcome	12449_16_PPIH_PPIH.txt.gz	Weighted median	3	0.0222182	0.688296	0.974249
12449_16_PPIH_PPIH.txt.gz	finngen_R9_CHIRBIL_PRIM.gz	outcome	12449_16_PPIH_PPIH.txt.gz	Inverse variance weighted	3	-0.110016	0.593827	0.853021
12449_16_PPIH_PPIH.txt.gz	finngen_R9_CHIRBIL_PRIM.gz	outcome	12449_16_PPIH_PPIH.txt.gz	Simple mode	3	0.680279	1.02095	0.573779
12449_16_PPIH_PPIH.txt.gz	finngen_R9_CHIRBIL_PRIM.gz	outcome	12449_16_PPIH_PPIH.txt.gz	Weighted mode	3	-0.76081	0.745025	0.41458
12549_33_HPGDS_PTGD2.txt.gz	finngen_R9_CHIRBIL_PRIM.gz	outcome	12549_33_HPGDS_PTGD2.txt.gz	MR Egger	65	0.118419	0.0882899	0.184655
12549_33_HPGDS_PTGD2.txt.gz	finngen_R9_CHIRBIL_PRIM.gz	outcome	12549_33_HPGDS_PTGD2.txt.gz	Weighted median	65	0.192375	0.0914756	0.035464
12549_33_HPGDS_PTGD2.txt.gz	finngen_R9_CHIRBIL_PRIM.gz	outcome	12549_33_HPGDS_PTGD2.txt.gz	Inverse variance weighted	65	0.0930623	0.0626517	0.13744
12549_33_HPGDS_PTGD2.txt.gz	finngen_R9_CHIRBIL_PRIM.gz	outcome	12549_33_HPGDS_PTGD2.txt.gz	Simple mode	65	0.039529	0.186147	0.832506
12549_33_HPGDS_PTGD2.txt.gz	finngen_R9_CHIRBIL_PRIM.gz	outcome	12549_33_HPGDS_PTGD2.txt.gz	Weighted mode	65	0.148642	0.0777896	0.0605095
12612_37_PSMB1_PSB1.txt.gz	finngen_R9_CHIRBIL_PRIM.gz	outcome	12612_37_PSMB1_PSB1.txt.gz	MR Egger	25	0.361024	0.310162	0.256363
12612_37_PSMB1_PSB1.txt.gz	finngen_R9_CHIRBIL_PRIM.gz	outcome	12612_37_PSMB1_PSB1.txt.gz	Weighted median	25	0.480593	0.179825	0.00752762
12612_37_PSMB1_PSB1.txt.gz	finngen_R9_CHIRBIL_PRIM.gz	outcome	12612_37_PSMB1_PSB1.txt.gz	Inverse variance weighted	25	0.468689	0.139646	0.000790057
12612_37_PSMB1_PSB1.txt.gz	finngen_R9_CHIRBIL_PRIM.gz	outcome	12612_37_PSMB1_PSB1.txt.gz	Simple mode	25	0.782984	0.311446	0.0190491
12612_37_PSMB1_PSB1.txt.gz	finngen_R9_CHIRBIL_PRIM.gz	outcome	12612_37_PSMB1_PSB1.txt.gz	Weighted mode	25	0.516617	0.15562	0.0028702
12616_45_NRBP1_NRBP.txt.gz	finngen_R9_CHIRBIL_PRIM.gz	outcome	12616_45_NRBP1_NRBP.txt.gz	Wald ratio	1	0.166835	1.2616	0.894794
12703_6_NEK7_NEK7.txt.gz	finngen_R9_CHIRBIL_PRIM.gz	outcome	12703_6_NEK7_NEK7.txt.gz	Wald ratio	1	-0.0783747	0.919643	0.932084
12727_7_PTGFRN_FPRP.txt.gz	finngen_R9_CHIRBIL_PRIM.gz	outcome	12727_7_PTGFRN_FPRP.txt.gz	MR Egger	100	0.170496	0.0727852	0.0211798
12727_7_PTGFRN_FPRP.txt.gz	finngen_R9_CHIRBIL_PRIM.gz	outcome	12727_7_PTGFRN_FPRP.txt.gz	Weighted median	100	0.185058	0.0793637	0.0197124
12727_7_PTGFRN_FPRP.txt.gz	finngen_R9_CHIRBIL_PRIM.gz	outcome	12727_7_PTGFRN_FPRP.txt.gz	Inverse variance weighted	100	0.15111	0.0477055	0.00153724
12727_7_PTGFRN_FPRP.txt.gz	finngen_R9_CHIRBIL_PRIM.gz	outcome	12727_7_PTGFRN_FPRP.txt.gz	Simple mode	100	0.299287	0.156174	0.0582026
12727_7_PTGFRN_FPRP.txt.gz	finngen_R9_CHIRBIL_PRIM.gz	outcome	12727_7_PTGFRN_FPRP.txt.gz	Weighted mode	100	0.204162	0.0670531	0.00298333
12940_35_ALDH3B1_AL3B1.txt.gz	finngen_R9_CHIRBIL_PRIM.gz	outcome	12940_35_ALDH3B1_AL3B1.txt.gz	MR Egger	3	0.882748	0.96124	0.527082
12940_35_ALDH3B1_AL3B1.txt.gz	finngen_R9_CHIRBIL_PRIM.gz	outcome	12940_35_ALDH3B1_AL3B1.txt.gz	Weighted median	3	0.125044	0.440915	0.776716
12940_35_ALDH3B1_AL3B1.txt.gz	finngen_R9_CHIRBIL_PRIM.gz	outcome	12940_35_ALDH3B1_AL3B1.txt.gz	Inverse variance weighted	3	0.134507	0.42582	0.752095
12940_35_ALDH3B1_AL3B1.txt.gz	finngen_R9_CHIRBIL_PRIM.gz	outcome	12940_35_ALDH3B1_AL3B1.txt.gz	Simple mode	3	-0.509961	0.695498	0.539715
12940_35_ALDH3B1_AL3B1.txt.gz	finngen_R9_CHIRBIL_PRIM.gz	outcome	12940_35_ALDH3B1_AL3B1.txt.gz	Weighted mode	3	0.355225	0.514125	0.561027
12990_39_MAP3K3_MAP3K3.txt.gz	finngen_R9_CHIRBIL_PRIM.gz	outcome	12990_39_MAP3K3_MAP3K3.txt.gz	Wald ratio	1	1.48558	1.30821	0.256133
13044_5_TSG101_TS101.txt.gz	finngen_R9_CHIRBIL_PRIM.gz	outcome	13044_5_TSG101_TS101.txt.gz	MR Egger	6	-0.361155	0.762596	0.660485
13044_5_TSG101_TS101.txt.gz	finngen_R9_CHIRBIL_PRIM.gz	outcome	13044_5_TSG101_TS101.txt.gz	Weighted median	6	-0.519019	0.367791	0.158192
13044_5_TSG101_TS101.txt.gz	finngen_R9_CHIRBIL_PRIM.gz	outcome	13044_5_TSG101_TS101.txt.gz	Inverse variance weighted	6	-0.607169	0.329371	0.0652677
13044_5_TSG101_TS101.txt.gz	finngen_R9_CHIRBIL_PRIM.gz	outcome	13044_5_TSG101_TS101.txt.gz	Simple mode	6	-0.497931	0.601895	0.445755
13044_5_TSG101_TS101.txt.gz	finngen_R9_CHIRBIL_PRIM.gz	outcome	13044_5_TSG101_TS101.txt.gz	Weighted mode	6	-0.504356	0.397848	0.26073
13088_397_BTC_BTC.txt.gz	finngen_R9_CHIRBIL_PRIM.gz	outcome	13088_397_BTC_BTC.txt.gz	MR Egger	11	0.159562	0.653284	0.812517
13088_397_BTC_BTC.txt.gz	finngen_R9_CHIRBIL_PRIM.gz	outcome	13088_397_BTC_BTC.txt.gz	Weighted median	11	-0.127405	0.338044	0.706257
13088_397_BTC_BTC.txt.gz	finngen_R9_CHIRBIL_PRIM.gz	outcome	13088_397_BTC_BTC.txt.gz	Inverse variance weighted	11	-0.0814129	0.249688	0.74438
13088_397_BTC_BTC.txt.gz	finngen_R9_CHIRBIL_PRIM.gz	outcome	13088_397_BTC_BTC.txt.gz	Simple mode	11	-0.0748746	0.512556	0.886761
13088_397_BTC_BTC.txt.gz	finngen_R9_CHIRBIL_PRIM.gz	outcome	13088_397_BTC_BTC.txt.gz	Weighted mode	11	-0.161316	0.405899	0.699402
13093_6_SECTM1_SECTM1.txt.gz	finngen_R9_CHIRBIL_PRIM.gz	outcome	13093_6_SECTM1_SECTM1.txt.gz	MR Egger	15	-0.375903	0.423505	0.390882
13093_6_SECTM1_SECTM1.txt.gz	finngen_R9_CHIRBIL_PRIM.gz	outcome	13093_6_SECTM1_SECTM1.txt.gz	Weighted median	15	-0.541724	0.246456	0.0279452
13093_6_SECTM1_SECTM1.txt.gz	finngen_R9_CHIRBIL_PRIM.gz	outcome	13093_6_SECTM1_SECTM1.txt.gz	Inverse variance weighted	15	-0.563893	0.186466	0.0024937
13093_6_SECTM1_SECTM1.txt.gz	finngen_R9_CHIRBIL_PRIM.gz	outcome	13093_6_SECTM1_SECTM1.txt.gz	Simple mode	15	-0.407294	0.380766	0.302864
13093_6_SECTM1_SECTM1.txt.gz	finngen_R9_CHIRBIL_PRIM.gz	outcome	13093_6_SECTM1_SECTM1.txt.gz	Weighted mode	15	-0.484088	0.246342	0.0695632
13094_75_RSPO3_RSPO3.txt.gz	finngen_R9_CHIRBIL_PRIM.gz	outcome	13094_75_RSPO3_RSPO3.txt.gz	MR Egger	17	0.288089	0.451576	0.533116
13094_75_RSPO3_RSPO3.txt.gz	finngen_R9_CHIRBIL_PRIM.gz	outcome	13094_75_RSPO3_RSPO3.txt.gz	Weighted median	17	0.644753	0.234243	0.00591429
13094_75_RSPO3_RSPO3.txt.gz	finngen_R9_CHIRBIL_PRIM.gz	outcome	13094_75_RSPO3_RSPO3.txt.gz	Inverse variance weighted	17	0.320216	0.193191	0.0974166
13094_75_RSPO3_RSPO3.txt.gz	finngen_R9_CHIRBIL_PRIM.gz	outcome	13094_75_RSPO3_RSPO3.txt.gz	Simple mode	17	0.524046	0.455116	0.266461
13094_75_RSPO3_RSPO3.txt.gz	finngen_R9_CHIRBIL_PRIM.gz	outcome	13094_75_RSPO3_RSPO3.txt.gz	Weighted mode	17	0.561341	0.253398	0.0415963
13095_51_REG1A_PSP.txt.gz	finngen_R9_CHIRBIL_PRIM.gz	outcome	13095_51_REG1A_PSP.txt.gz	MR Egger	48	-0.100606	0.183288	0.585731
13095_51_REG1A_PSP.txt.gz	finngen_R9_CHIRBIL_PRIM.gz	outcome	13095_51_REG1A_PSP.txt.gz	Weighted median	48	0.0264758	0.150556	0.860409
13095_51_REG1A_PSP.txt.gz	finngen_R9_CHIRBIL_PRIM.gz	outcome	13095_51_REG1A_PSP.txt.gz	Inverse variance weighted	48	-0.0689369	0.102442	0.500989
13095_51_REG1A_PSP.txt.gz	finngen_R9_CHIRBIL_PRIM.gz	outcome	13095_51_REG1A_PSP.txt.gz	Simple mode	48	0.206551	0.285089	0.472341
13095_51_REG1A_PSP.txt.gz	finngen_R9_CHIRBIL_PRIM.gz	outcome	13095_51_REG1A_PSP.txt.gz	Weighted mode	48	0.082526	0.166413	0.622268
13109_82_NEGR1_NEGR1.txt.gz	finngen_R9_CHIRBIL_PRIM.gz	outcome	13109_82_NEGR1_NEGR1.txt.gz	MR Egger	10	-0.0202844	0.954966	0.983574
13109_82_NEGR1_NEGR1.txt.gz	finngen_R9_CHIRBIL_PRIM.gz	outcome	13109_82_NEGR1_NEGR1.txt.gz	Weighted median	10	-0.0553317	0.379519	0.884084
13109_82_NEGR1_NEGR1.txt.gz	finngen_R9_CHIRBIL_PRIM.gz	outcome	13109_82_NEGR1_NEGR1.txt.gz	Inverse variance weighted	10	0.0781785	0.292182	0.789032
13109_82_NEGR1_NEGR1.txt.gz	finngen_R9_CHIRBIL_PRIM.gz	outcome	13109_82_NEGR1_NEGR1.txt.gz	Simple mode	10	-0.0259231	0.590032	0.965916
13109_82_NEGR1_NEGR1.txt.gz	finngen_R9_CHIRBIL_PRIM.gz	outcome	13109_82_NEGR1_NEGR1.txt.gz	Weighted mode	10	-0.116512	0.4247	0.790017
13112_179_FSTL1_FSTL1.txt.gz	finngen_R9_CHIRBIL_PRIM.gz	outcome	13112_179_FSTL1_FSTL1.txt.gz	MR Egger	8	0.573281	1.05346	0.605927
13112_179_FSTL1_FSTL1.txt.gz	finngen_R9_CHIRBIL_PRIM.gz	outcome	13112_179_FSTL1_FSTL1.txt.gz	Weighted median	8	0.345304	0.363431	0.34205
13112_179_FSTL1_FSTL1.txt.gz	finngen_R9_CHIRBIL_PRIM.gz	outcome	13112_179_FSTL1_FSTL1.txt.gz	Inverse variance weighted	8	0.164049	0.295318	0.578553
13112_179_FSTL1_FSTL1.txt.gz	finngen_R9_CHIRBIL_PRIM.gz	outcome	13112_179_FSTL1_FSTL1.txt.gz	Simple mode	8	0.772062	0.607405	0.244306
13112_179_FSTL1_FSTL1.txt.gz	finngen_R9_CHIRBIL_PRIM.gz	outcome	13112_179_FSTL1_FSTL1.txt.gz	Weighted mode	8	0.397478	0.378195	0.328187
13113_7_SPP1_Osteopontin.txt.gz	finngen_R9_CHIRBIL_PRIM.gz	outcome	13113_7_SPP1_Osteopontin.txt.gz	MR Egger	8	-0.11396	1.26924	0.931379
13113_7_SPP1_Osteopontin.txt.gz	finngen_R9_CHIRBIL_PRIM.gz	outcome	13113_7_SPP1_Osteopontin.txt.gz	Weighted median	8	0.234002	0.510478	0.646667
13113_7_SPP1_Osteopontin.txt.gz	finngen_R9_CHIRBIL_PRIM.gz	outcome	13113_7_SPP1_Osteopontin.txt.gz	Inverse variance weighted	8	0.148768	0.393106	0.705102
13113_7_SPP1_Osteopontin.txt.gz	finngen_R9_CHIRBIL_PRIM.gz	outcome	13113_7_SPP1_Osteopontin.txt.gz	Simple mode	8	0.620713	0.811262	0.469205
13113_7_SPP1_Osteopontin.txt.gz	finngen_R9_CHIRBIL_PRIM.gz	outcome	13113_7_SPP1_Osteopontin.txt.gz	Weighted mode	8	0.561401	0.776446	0.493101
13114_50_LUM_Lumican.txt.gz	finngen_R9_CHIRBIL_PRIM.gz	outcome	13114_50_LUM_Lumican.txt.gz	MR Egger	17	-0.257824	0.456248	0.580363
13114_50_LUM_Lumican.txt.gz	finngen_R9_CHIRBIL_PRIM.gz	outcome	13114_50_LUM_Lumican.txt.gz	Weighted median	17	0.0919629	0.30073	0.759758
13114_50_LUM_Lumican.txt.gz	finngen_R9_CHIRBIL_PRIM.gz	outcome	13114_50_LUM_Lumican.txt.gz	Inverse variance weighted	17	-0.191646	0.275322	0.48638
13114_50_LUM_Lumican.txt.gz	finngen_R9_CHIRBIL_PRIM.gz	outcome	13114_50_LUM_Lumican.txt.gz	Simple mode	17	0.51435	0.527234	0.343801
13114_50_LUM_Lumican.txt.gz	finngen_R9_CHIRBIL_PRIM.gz	outcome	13114_50_LUM_Lumican.txt.gz	Weighted mode	17	0.219342	0.450014	0.632577
13116_25_CD177_CD177.txt.gz	finngen_R9_CHIRBIL_PRIM.gz	outcome	13116_25_CD177_CD177.txt.gz	MR Egger	126	-0.0973639	0.061342	0.115007
13116_25_CD177_CD177.txt.gz	finngen_R9_CHIRBIL_PRIM.gz	outcome	13116_25_CD177_CD177.txt.gz	Weighted median	126	-0.104137	0.055972	0.0628126
13116_25_CD177_CD177.txt.gz	finngen_R9_CHIRBIL_PRIM.gz	outcome	13116_25_CD177_CD177.txt.gz	Inverse variance weighted	126	-0.0436543	0.0375659	0.245205
13116_25_CD177_CD177.txt.gz	finngen_R9_CHIRBIL_PRIM.gz	outcome	13116_25_CD177_CD177.txt.gz	Simple mode	126	-0.0512588	0.105606	0.628259
13116_25_CD177_CD177.txt.gz	finngen_R9_CHIRBIL_PRIM.gz	outcome	13116_25_CD177_CD177.txt.gz	Weighted mode	126	-0.095109	0.0546805	0.0844333
13118_5_SMOC1_SMOC1.txt.gz	finngen_R9_CHIRBIL_PRIM.gz	outcome	13118_5_SMOC1_SMOC1.txt.gz	MR Egger	21	-0.117462	0.416163	0.780803
13118_5_SMOC1_SMOC1.txt.gz	finngen_R9_CHIRBIL_PRIM.gz	outcome	13118_5_SMOC1_SMOC1.txt.gz	Weighted median	21	-0.430985	0.225931	0.0564442
13118_5_SMOC1_SMOC1.txt.gz	finngen_R9_CHIRBIL_PRIM.gz	outcome	13118_5_SMOC1_SMOC1.txt.gz	Inverse variance weighted	21	-0.372426	0.171878	0.0302493
13118_5_SMOC1_SMOC1.txt.gz	finngen_R9_CHIRBIL_PRIM.gz	outcome	13118_5_SMOC1_SMOC1.txt.gz	Simple mode	21	-0.630754	0.349329	0.0860538
13118_5_SMOC1_SMOC1.txt.gz	finngen_R9_CHIRBIL_PRIM.gz	outcome	13118_5_SMOC1_SMOC1.txt.gz	Weighted mode	21	-0.419955	0.285901	0.15742
13119_26_SERPINA10_protein_Z_inhibitor.txt.gz	finngen_R9_CHIRBIL_PRIM.gz	outcome	13119_26_SERPINA10_protein_Z_inhibitor.txt.gz	MR Egger	119	0.11044	0.0845169	0.193869
13119_26_SERPINA10_protein_Z_inhibitor.txt.gz	finngen_R9_CHIRBIL_PRIM.gz	outcome	13119_26_SERPINA10_protein_Z_inhibitor.txt.gz	Weighted median	119	0.147289	0.0837112	0.0784952
13119_26_SERPINA10_protein_Z_inhibitor.txt.gz	finngen_R9_CHIRBIL_PRIM.gz	outcome	13119_26_SERPINA10_protein_Z_inhibitor.txt.gz	Inverse variance weighted	119	0.13764	0.052477	0.00871928
13119_26_SERPINA10_protein_Z_inhibitor.txt.gz	finngen_R9_CHIRBIL_PRIM.gz	outcome	13119_26_SERPINA10_protein_Z_inhibitor.txt.gz	Simple mode	119	0.217935	0.166688	0.193604
13119_26_SERPINA10_protein_Z_inhibitor.txt.gz	finngen_R9_CHIRBIL_PRIM.gz	outcome	13119_26_SERPINA10_protein_Z_inhibitor.txt.gz	Weighted mode	119	0.133719	0.0827794	0.108903
13122_19_FLRT2_FLRT2.txt.gz	finngen_R9_CHIRBIL_PRIM.gz	outcome	13122_19_FLRT2_FLRT2.txt.gz	MR Egger	43	0.431892	0.288295	0.141771
13122_19_FLRT2_FLRT2.txt.gz	finngen_R9_CHIRBIL_PRIM.gz	outcome	13122_19_FLRT2_FLRT2.txt.gz	Weighted median	43	0.0907875	0.215095	0.672965
13122_19_FLRT2_FLRT2.txt.gz	finngen_R9_CHIRBIL_PRIM.gz	outcome	13122_19_FLRT2_FLRT2.txt.gz	Inverse variance weighted	43	0.137972	0.132878	0.299114
13122_19_FLRT2_FLRT2.txt.gz	finngen_R9_CHIRBIL_PRIM.gz	outcome	13122_19_FLRT2_FLRT2.txt.gz	Simple mode	43	-0.0407754	0.39516	0.918306
13122_19_FLRT2_FLRT2.txt.gz	finngen_R9_CHIRBIL_PRIM.gz	outcome	13122_19_FLRT2_FLRT2.txt.gz	Weighted mode	43	0.153294	0.221324	0.492359
13124_20_ISLR2_ISLR2.txt.gz	finngen_R9_CHIRBIL_PRIM.gz	outcome	13124_20_ISLR2_ISLR2.txt.gz	MR Egger	32	0.637566	0.431035	0.149525
13124_20_ISLR2_ISLR2.txt.gz	finngen_R9_CHIRBIL_PRIM.gz	outcome	13124_20_ISLR2_ISLR2.txt.gz	Weighted median	32	0.212092	0.241142	0.379111
13124_20_ISLR2_ISLR2.txt.gz	finngen_R9_CHIRBIL_PRIM.gz	outcome	13124_20_ISLR2_ISLR2.txt.gz	Inverse variance weighted	32	0.185613	0.176732	0.293602
13124_20_ISLR2_ISLR2.txt.gz	finngen_R9_CHIRBIL_PRIM.gz	outcome	13124_20_ISLR2_ISLR2.txt.gz	Simple mode	32	0.315527	0.458623	0.496576
13124_20_ISLR2_ISLR2.txt.gz	finngen_R9_CHIRBIL_PRIM.gz	outcome	13124_20_ISLR2_ISLR2.txt.gz	Weighted mode	32	0.297291	0.305639	0.338237
13133_73_LTBP4_LTBP4.txt.gz	finngen_R9_CHIRBIL_PRIM.gz	outcome	13133_73_LTBP4_LTBP4.txt.gz	Inverse variance weighted	2	0.428372	0.444363	0.335039
13381_49_B4GALT1_B4GT1.txt.gz	finngen_R9_CHIRBIL_PRIM.gz	outcome	13381_49_B4GALT1_B4GT1.txt.gz	MR Egger	13	0.0613149	0.394318	0.879247
13381_49_B4GALT1_B4GT1.txt.gz	finngen_R9_CHIRBIL_PRIM.gz	outcome	13381_49_B4GALT1_B4GT1.txt.gz	Weighted median	13	0.117357	0.279893	0.675003
13381_49_B4GALT1_B4GT1.txt.gz	finngen_R9_CHIRBIL_PRIM.gz	outcome	13381_49_B4GALT1_B4GT1.txt.gz	Inverse variance weighted	13	0.143704	0.212565	0.499011
13381_49_B4GALT1_B4GT1.txt.gz	finngen_R9_CHIRBIL_PRIM.gz	outcome	13381_49_B4GALT1_B4GT1.txt.gz	Simple mode	13	0.403358	0.447613	0.385248
13381_49_B4GALT1_B4GT1.txt.gz	finngen_R9_CHIRBIL_PRIM.gz	outcome	13381_49_B4GALT1_B4GT1.txt.gz	Weighted mode	13	0.182439	0.298304	0.55222
13388_57_PCSK1_NEC1.txt.gz	finngen_R9_CHIRBIL_PRIM.gz	outcome	13388_57_PCSK1_NEC1.txt.gz	MR Egger	124	0.0622464	0.0926034	0.502738
13388_57_PCSK1_NEC1.txt.gz	finngen_R9_CHIRBIL_PRIM.gz	outcome	13388_57_PCSK1_NEC1.txt.gz	Weighted median	124	0.00638746	0.0766246	0.933565
13388_57_PCSK1_NEC1.txt.gz	finngen_R9_CHIRBIL_PRIM.gz	outcome	13388_57_PCSK1_NEC1.txt.gz	Inverse variance weighted	124	0.010788	0.0523956	0.836873
13388_57_PCSK1_NEC1.txt.gz	finngen_R9_CHIRBIL_PRIM.gz	outcome	13388_57_PCSK1_NEC1.txt.gz	Simple mode	124	-0.0901254	0.159996	0.574258
13388_57_PCSK1_NEC1.txt.gz	finngen_R9_CHIRBIL_PRIM.gz	outcome	13388_57_PCSK1_NEC1.txt.gz	Weighted mode	124	-0.0365906	0.0737107	0.620492
13397_88_DEFB4A_HBD_2.txt.gz	finngen_R9_CHIRBIL_PRIM.gz	outcome	13397_88_DEFB4A_HBD_2.txt.gz	MR Egger	20	0.294704	0.534916	0.588452
13397_88_DEFB4A_HBD_2.txt.gz	finngen_R9_CHIRBIL_PRIM.gz	outcome	13397_88_DEFB4A_HBD_2.txt.gz	Weighted median	20	0.0448349	0.363212	0.901759
13397_88_DEFB4A_HBD_2.txt.gz	finngen_R9_CHIRBIL_PRIM.gz	outcome	13397_88_DEFB4A_HBD_2.txt.gz	Inverse variance weighted	20	-0.0207351	0.25242	0.934531
13397_88_DEFB4A_HBD_2.txt.gz	finngen_R9_CHIRBIL_PRIM.gz	outcome	13397_88_DEFB4A_HBD_2.txt.gz	Simple mode	20	-0.35721	0.605482	0.562169
13397_88_DEFB4A_HBD_2.txt.gz	finngen_R9_CHIRBIL_PRIM.gz	outcome	13397_88_DEFB4A_HBD_2.txt.gz	Weighted mode	20	-0.0251614	0.406524	0.951294
13405_61_SPINK2_ISK2.txt.gz	finngen_R9_CHIRBIL_PRIM.gz	outcome	13405_61_SPINK2_ISK2.txt.gz	MR Egger	47	-0.0209674	0.173971	0.904606
13405_61_SPINK2_ISK2.txt.gz	finngen_R9_CHIRBIL_PRIM.gz	outcome	13405_61_SPINK2_ISK2.txt.gz	Weighted median	47	-0.0234016	0.145494	0.872217
13405_61_SPINK2_ISK2.txt.gz	finngen_R9_CHIRBIL_PRIM.gz	outcome	13405_61_SPINK2_ISK2.txt.gz	Inverse variance weighted	47	0.0742512	0.10142	0.464098
13405_61_SPINK2_ISK2.txt.gz	finngen_R9_CHIRBIL_PRIM.gz	outcome	13405_61_SPINK2_ISK2.txt.gz	Simple mode	47	0.016962	0.233232	0.94234
13405_61_SPINK2_ISK2.txt.gz	finngen_R9_CHIRBIL_PRIM.gz	outcome	13405_61_SPINK2_ISK2.txt.gz	Weighted mode	47	-0.0294687	0.166299	0.860126
13438_115_CHRD_CHRD.txt.gz	finngen_R9_CHIRBIL_PRIM.gz	outcome	13438_115_CHRD_CHRD.txt.gz	Inverse variance weighted	2	-0.446435	1.16628	0.701879
13460_4_CHAD_CHAD.txt.gz	finngen_R9_CHIRBIL_PRIM.gz	outcome	13460_4_CHAD_CHAD.txt.gz	Wald ratio	1	1.40497	1.30844	0.282926
13463_1_PXDN_PXDN.txt.gz	finngen_R9_CHIRBIL_PRIM.gz	outcome	13463_1_PXDN_PXDN.txt.gz	MR Egger	11	-0.0956435	0.727104	0.898241
13463_1_PXDN_PXDN.txt.gz	finngen_R9_CHIRBIL_PRIM.gz	outcome	13463_1_PXDN_PXDN.txt.gz	Weighted median	11	0.0496043	0.300608	0.868934
13463_1_PXDN_PXDN.txt.gz	finngen_R9_CHIRBIL_PRIM.gz	outcome	13463_1_PXDN_PXDN.txt.gz	Inverse variance weighted	11	-0.105828	0.256035	0.679363
13463_1_PXDN_PXDN.txt.gz	finngen_R9_CHIRBIL_PRIM.gz	outcome	13463_1_PXDN_PXDN.txt.gz	Simple mode	11	0.00747783	0.446334	0.986963
13463_1_PXDN_PXDN.txt.gz	finngen_R9_CHIRBIL_PRIM.gz	outcome	13463_1_PXDN_PXDN.txt.gz	Weighted mode	11	0.0528517	0.335785	0.878064
13666_222_CA10_Carbonic_Anhydrase_X.txt.gz	finngen_R9_CHIRBIL_PRIM.gz	outcome	13666_222_CA10_Carbonic_Anhydrase_X.txt.gz	MR Egger	18	0.519863	0.225031	0.0345466
13666_222_CA10_Carbonic_Anhydrase_X.txt.gz	finngen_R9_CHIRBIL_PRIM.gz	outcome	13666_222_CA10_Carbonic_Anhydrase_X.txt.gz	Weighted median	18	0.440666	0.195312	0.0240571
13666_222_CA10_Carbonic_Anhydrase_X.txt.gz	finngen_R9_CHIRBIL_PRIM.gz	outcome	13666_222_CA10_Carbonic_Anhydrase_X.txt.gz	Inverse variance weighted	18	0.322183	0.145853	0.0271777
13666_222_CA10_Carbonic_Anhydrase_X.txt.gz	finngen_R9_CHIRBIL_PRIM.gz	outcome	13666_222_CA10_Carbonic_Anhydrase_X.txt.gz	Simple mode	18	0.412135	0.35396	0.260361
13666_222_CA10_Carbonic_Anhydrase_X.txt.gz	finngen_R9_CHIRBIL_PRIM.gz	outcome	13666_222_CA10_Carbonic_Anhydrase_X.txt.gz	Weighted mode	18	0.443702	0.196684	0.0375404
13669_6_FGFR3_FGFR_3.txt.gz	finngen_R9_CHIRBIL_PRIM.gz	outcome	13669_6_FGFR3_FGFR_3.txt.gz	MR Egger	23	-0.76197	0.484323	0.130603
13669_6_FGFR3_FGFR_3.txt.gz	finngen_R9_CHIRBIL_PRIM.gz	outcome	13669_6_FGFR3_FGFR_3.txt.gz	Weighted median	23	-0.133406	0.263072	0.612078
13669_6_FGFR3_FGFR_3.txt.gz	finngen_R9_CHIRBIL_PRIM.gz	outcome	13669_6_FGFR3_FGFR_3.txt.gz	Inverse variance weighted	23	-0.17672	0.19257	0.358782
13669_6_FGFR3_FGFR_3.txt.gz	finngen_R9_CHIRBIL_PRIM.gz	outcome	13669_6_FGFR3_FGFR_3.txt.gz	Simple mode	23	-0.452516	0.43462	0.309102
13669_6_FGFR3_FGFR_3.txt.gz	finngen_R9_CHIRBIL_PRIM.gz	outcome	13669_6_FGFR3_FGFR_3.txt.gz	Weighted mode	23	-0.198397	0.298656	0.513403
13671_40_ELANE_Elastase.txt.gz	finngen_R9_CHIRBIL_PRIM.gz	outcome	13671_40_ELANE_Elastase.txt.gz	MR Egger	60	0.323515	0.164513	0.0540315
13671_40_ELANE_Elastase.txt.gz	finngen_R9_CHIRBIL_PRIM.gz	outcome	13671_40_ELANE_Elastase.txt.gz	Weighted median	60	0.165929	0.136945	0.225647
13671_40_ELANE_Elastase.txt.gz	finngen_R9_CHIRBIL_PRIM.gz	outcome	13671_40_ELANE_Elastase.txt.gz	Inverse variance weighted	60	0.194918	0.0926309	0.0353571
13671_40_ELANE_Elastase.txt.gz	finngen_R9_CHIRBIL_PRIM.gz	outcome	13671_40_ELANE_Elastase.txt.gz	Simple mode	60	0.302792	0.288967	0.298985
13671_40_ELANE_Elastase.txt.gz	finngen_R9_CHIRBIL_PRIM.gz	outcome	13671_40_ELANE_Elastase.txt.gz	Weighted mode	60	0.31805	0.135862	0.0226318
13676_46_INHBB_Inhibin_bB_chain.txt.gz	finngen_R9_CHIRBIL_PRIM.gz	outcome	13676_46_INHBB_Inhibin_bB_chain.txt.gz	MR Egger	23	0.224156	0.28195	0.435496
13676_46_INHBB_Inhibin_bB_chain.txt.gz	finngen_R9_CHIRBIL_PRIM.gz	outcome	13676_46_INHBB_Inhibin_bB_chain.txt.gz	Weighted median	23	-0.0439722	0.161499	0.78541
13676_46_INHBB_Inhibin_bB_chain.txt.gz	finngen_R9_CHIRBIL_PRIM.gz	outcome	13676_46_INHBB_Inhibin_bB_chain.txt.gz	Inverse variance weighted	23	0.0782324	0.148483	0.598278
13676_46_INHBB_Inhibin_bB_chain.txt.gz	finngen_R9_CHIRBIL_PRIM.gz	outcome	13676_46_INHBB_Inhibin_bB_chain.txt.gz	Simple mode	23	0.0756686	0.323207	0.817058
13676_46_INHBB_Inhibin_bB_chain.txt.gz	finngen_R9_CHIRBIL_PRIM.gz	outcome	13676_46_INHBB_Inhibin_bB_chain.txt.gz	Weighted mode	23	0.0574178	0.161318	0.725284
13682_47_CSF1R_M_CSF_R.txt.gz	finngen_R9_CHIRBIL_PRIM.gz	outcome	13682_47_CSF1R_M_CSF_R.txt.gz	MR Egger	10	-0.495631	0.944523	0.613989
13682_47_CSF1R_M_CSF_R.txt.gz	finngen_R9_CHIRBIL_PRIM.gz	outcome	13682_47_CSF1R_M_CSF_R.txt.gz	Weighted median	10	-0.0991632	0.390337	0.799461
13682_47_CSF1R_M_CSF_R.txt.gz	finngen_R9_CHIRBIL_PRIM.gz	outcome	13682_47_CSF1R_M_CSF_R.txt.gz	Inverse variance weighted	10	-0.224139	0.308706	0.467803
13682_47_CSF1R_M_CSF_R.txt.gz	finngen_R9_CHIRBIL_PRIM.gz	outcome	13682_47_CSF1R_M_CSF_R.txt.gz	Simple mode	10	0.133236	0.546621	0.812894
13682_47_CSF1R_M_CSF_R.txt.gz	finngen_R9_CHIRBIL_PRIM.gz	outcome	13682_47_CSF1R_M_CSF_R.txt.gz	Weighted mode	10	-0.0361788	0.454896	0.93835
13686_2_IL5RA_IL_5_Ra.txt.gz	finngen_R9_CHIRBIL_PRIM.gz	outcome	13686_2_IL5RA_IL_5_Ra.txt.gz	MR Egger	86	-0.105221	0.111619	0.348547
13686_2_IL5RA_IL_5_Ra.txt.gz	finngen_R9_CHIRBIL_PRIM.gz	outcome	13686_2_IL5RA_IL_5_Ra.txt.gz	Weighted median	86	-0.354292	0.110554	0.00135204
13686_2_IL5RA_IL_5_Ra.txt.gz	finngen_R9_CHIRBIL_PRIM.gz	outcome	13686_2_IL5RA_IL_5_Ra.txt.gz	Inverse variance weighted	86	-0.238745	0.0647798	0.000228267
13686_2_IL5RA_IL_5_Ra.txt.gz	finngen_R9_CHIRBIL_PRIM.gz	outcome	13686_2_IL5RA_IL_5_Ra.txt.gz	Simple mode	86	0.179017	0.237164	0.452441
13686_2_IL5RA_IL_5_Ra.txt.gz	finngen_R9_CHIRBIL_PRIM.gz	outcome	13686_2_IL5RA_IL_5_Ra.txt.gz	Weighted mode	86	-0.323828	0.116954	0.00690491
13692_154_WISP1_WISP_1.txt.gz	finngen_R9_CHIRBIL_PRIM.gz	outcome	13692_154_WISP1_WISP_1.txt.gz	MR Egger	125	0.0455715	0.0982339	0.643533
13692_154_WISP1_WISP_1.txt.gz	finngen_R9_CHIRBIL_PRIM.gz	outcome	13692_154_WISP1_WISP_1.txt.gz	Weighted median	125	0.0371882	0.0879216	0.672317
13692_154_WISP1_WISP_1.txt.gz	finngen_R9_CHIRBIL_PRIM.gz	outcome	13692_154_WISP1_WISP_1.txt.gz	Inverse variance weighted	125	0.0392587	0.0548368	0.474042
13692_154_WISP1_WISP_1.txt.gz	finngen_R9_CHIRBIL_PRIM.gz	outcome	13692_154_WISP1_WISP_1.txt.gz	Simple mode	125	0.262111	0.184147	0.157138
13692_154_WISP1_WISP_1.txt.gz	finngen_R9_CHIRBIL_PRIM.gz	outcome	13692_154_WISP1_WISP_1.txt.gz	Weighted mode	125	0.0723125	0.085709	0.400463
13700_10_ANXA2_annexin_II.txt.gz	finngen_R9_CHIRBIL_PRIM.gz	outcome	13700_10_ANXA2_annexin_II.txt.gz	MR Egger	110	0.170257	0.0990367	0.0884552
13700_10_ANXA2_annexin_II.txt.gz	finngen_R9_CHIRBIL_PRIM.gz	outcome	13700_10_ANXA2_annexin_II.txt.gz	Weighted median	110	0.160589	0.0962495	0.0952245
13700_10_ANXA2_annexin_II.txt.gz	finngen_R9_CHIRBIL_PRIM.gz	outcome	13700_10_ANXA2_annexin_II.txt.gz	Inverse variance weighted	110	0.184814	0.0601887	0.00213642
13700_10_ANXA2_annexin_II.txt.gz	finngen_R9_CHIRBIL_PRIM.gz	outcome	13700_10_ANXA2_annexin_II.txt.gz	Simple mode	110	0.29158	0.178057	0.104397
13700_10_ANXA2_annexin_II.txt.gz	finngen_R9_CHIRBIL_PRIM.gz	outcome	13700_10_ANXA2_annexin_II.txt.gz	Weighted mode	110	0.143144	0.0863433	0.100223
13717_15_FCN2_FCN2.txt.gz	finngen_R9_CHIRBIL_PRIM.gz	outcome	13717_15_FCN2_FCN2.txt.gz	MR Egger	131	0.0303991	0.0754179	0.68756
13717_15_FCN2_FCN2.txt.gz	finngen_R9_CHIRBIL_PRIM.gz	outcome	13717_15_FCN2_FCN2.txt.gz	Weighted median	131	-0.02757	0.0817311	0.735872
13717_15_FCN2_FCN2.txt.gz	finngen_R9_CHIRBIL_PRIM.gz	outcome	13717_15_FCN2_FCN2.txt.gz	Inverse variance weighted	131	-0.0255048	0.0488473	0.601578
13717_15_FCN2_FCN2.txt.gz	finngen_R9_CHIRBIL_PRIM.gz	outcome	13717_15_FCN2_FCN2.txt.gz	Simple mode	131	-0.0481536	0.139543	0.730592
13717_15_FCN2_FCN2.txt.gz	finngen_R9_CHIRBIL_PRIM.gz	outcome	13717_15_FCN2_FCN2.txt.gz	Weighted mode	131	0.00247739	0.0717408	0.972505
13719_19_PAK4_PAK4.txt.gz	finngen_R9_CHIRBIL_PRIM.gz	outcome	13719_19_PAK4_PAK4.txt.gz	Wald ratio	1	0.849799	1.35721	0.531225
13720_95_PRTN3_Proteinase_3.txt.gz	finngen_R9_CHIRBIL_PRIM.gz	outcome	13720_95_PRTN3_Proteinase_3.txt.gz	MR Egger	65	-0.198205	0.191946	0.305737
13720_95_PRTN3_Proteinase_3.txt.gz	finngen_R9_CHIRBIL_PRIM.gz	outcome	13720_95_PRTN3_Proteinase_3.txt.gz	Weighted median	65	-0.0812939	0.149375	0.586285
13720_95_PRTN3_Proteinase_3.txt.gz	finngen_R9_CHIRBIL_PRIM.gz	outcome	13720_95_PRTN3_Proteinase_3.txt.gz	Inverse variance weighted	65	-0.050405	0.0943657	0.593241
13720_95_PRTN3_Proteinase_3.txt.gz	finngen_R9_CHIRBIL_PRIM.gz	outcome	13720_95_PRTN3_Proteinase_3.txt.gz	Simple mode	65	0.152863	0.325452	0.64017
13720_95_PRTN3_Proteinase_3.txt.gz	finngen_R9_CHIRBIL_PRIM.gz	outcome	13720_95_PRTN3_Proteinase_3.txt.gz	Weighted mode	65	-0.0383705	0.199469	0.848067
13733_5_IL12B_IL_12_p40.txt.gz	finngen_R9_CHIRBIL_PRIM.gz	outcome	13733_5_IL12B_IL_12_p40.txt.gz	MR Egger	52	0.201282	0.167117	0.23409
13733_5_IL12B_IL_12_p40.txt.gz	finngen_R9_CHIRBIL_PRIM.gz	outcome	13733_5_IL12B_IL_12_p40.txt.gz	Weighted median	52	-0.0478772	0.131383	0.715552
13733_5_IL12B_IL_12_p40.txt.gz	finngen_R9_CHIRBIL_PRIM.gz	outcome	13733_5_IL12B_IL_12_p40.txt.gz	Inverse variance weighted	52	0.0648074	0.108632	0.550789
13733_5_IL12B_IL_12_p40.txt.gz	finngen_R9_CHIRBIL_PRIM.gz	outcome	13733_5_IL12B_IL_12_p40.txt.gz	Simple mode	52	-0.0762771	0.252942	0.764214
13733_5_IL12B_IL_12_p40.txt.gz	finngen_R9_CHIRBIL_PRIM.gz	outcome	13733_5_IL12B_IL_12_p40.txt.gz	Weighted mode	52	0.0849726	0.108297	0.436301
13738_8_INHBA_Inhibin_bA_chain.txt.gz	finngen_R9_CHIRBIL_PRIM.gz	outcome	13738_8_INHBA_Inhibin_bA_chain.txt.gz	Wald ratio	1	0.773639	0.716956	0.28056
13740_51_FRZB_sFRP_3.txt.gz	finngen_R9_CHIRBIL_PRIM.gz	outcome	13740_51_FRZB_sFRP_3.txt.gz	MR Egger	55	0.44152	0.165988	0.0103152
13740_51_FRZB_sFRP_3.txt.gz	finngen_R9_CHIRBIL_PRIM.gz	outcome	13740_51_FRZB_sFRP_3.txt.gz	Weighted median	55	0.249153	0.138153	0.0713159
13740_51_FRZB_sFRP_3.txt.gz	finngen_R9_CHIRBIL_PRIM.gz	outcome	13740_51_FRZB_sFRP_3.txt.gz	Inverse variance weighted	55	0.187894	0.0981196	0.0554989
13740_51_FRZB_sFRP_3.txt.gz	finngen_R9_CHIRBIL_PRIM.gz	outcome	13740_51_FRZB_sFRP_3.txt.gz	Simple mode	55	0.214177	0.226155	0.34784
13740_51_FRZB_sFRP_3.txt.gz	finngen_R9_CHIRBIL_PRIM.gz	outcome	13740_51_FRZB_sFRP_3.txt.gz	Weighted mode	55	0.230748	0.13027	0.0821528
13748_4_CCL8_MCP_2.txt.gz	finngen_R9_CHIRBIL_PRIM.gz	outcome	13748_4_CCL8_MCP_2.txt.gz	MR Egger	159	-0.0451965	0.0713384	0.527296
13748_4_CCL8_MCP_2.txt.gz	finngen_R9_CHIRBIL_PRIM.gz	outcome	13748_4_CCL8_MCP_2.txt.gz	Weighted median	159	-0.0102051	0.0618951	0.86904
13748_4_CCL8_MCP_2.txt.gz	finngen_R9_CHIRBIL_PRIM.gz	outcome	13748_4_CCL8_MCP_2.txt.gz	Inverse variance weighted	159	-0.052694	0.0464986	0.257114
13748_4_CCL8_MCP_2.txt.gz	finngen_R9_CHIRBIL_PRIM.gz	outcome	13748_4_CCL8_MCP_2.txt.gz	Simple mode	159	-0.039239	0.127979	0.759549
13748_4_CCL8_MCP_2.txt.gz	finngen_R9_CHIRBIL_PRIM.gz	outcome	13748_4_CCL8_MCP_2.txt.gz	Weighted mode	159	-0.0168902	0.058341	0.772572
13930_3_APOBEC3G_ABC3G.txt.gz	finngen_R9_CHIRBIL_PRIM.gz	outcome	13930_3_APOBEC3G_ABC3G.txt.gz	MR Egger	4	-0.159601	1.31205	0.914302
13930_3_APOBEC3G_ABC3G.txt.gz	finngen_R9_CHIRBIL_PRIM.gz	outcome	13930_3_APOBEC3G_ABC3G.txt.gz	Weighted median	4	-0.226456	0.421768	0.591323
13930_3_APOBEC3G_ABC3G.txt.gz	finngen_R9_CHIRBIL_PRIM.gz	outcome	13930_3_APOBEC3G_ABC3G.txt.gz	Inverse variance weighted	4	-0.217162	0.380415	0.568097
13930_3_APOBEC3G_ABC3G.txt.gz	finngen_R9_CHIRBIL_PRIM.gz	outcome	13930_3_APOBEC3G_ABC3G.txt.gz	Simple mode	4	-0.569662	0.62856	0.43159
13930_3_APOBEC3G_ABC3G.txt.gz	finngen_R9_CHIRBIL_PRIM.gz	outcome	13930_3_APOBEC3G_ABC3G.txt.gz	Weighted mode	4	-0.111778	0.506566	0.839522
13944_3_SULT1A3_SULT_1A3.txt.gz	finngen_R9_CHIRBIL_PRIM.gz	outcome	13944_3_SULT1A3_SULT_1A3.txt.gz	MR Egger	17	0.283648	0.586709	0.635753
13944_3_SULT1A3_SULT_1A3.txt.gz	finngen_R9_CHIRBIL_PRIM.gz	outcome	13944_3_SULT1A3_SULT_1A3.txt.gz	Weighted median	17	0.866074	0.327222	0.00812705
13944_3_SULT1A3_SULT_1A3.txt.gz	finngen_R9_CHIRBIL_PRIM.gz	outcome	13944_3_SULT1A3_SULT_1A3.txt.gz	Inverse variance weighted	17	0.64256	0.266881	0.0160551
13944_3_SULT1A3_SULT_1A3.txt.gz	finngen_R9_CHIRBIL_PRIM.gz	outcome	13944_3_SULT1A3_SULT_1A3.txt.gz	Simple mode	17	1.06056	0.490598	0.0461336
13944_3_SULT1A3_SULT_1A3.txt.gz	finngen_R9_CHIRBIL_PRIM.gz	outcome	13944_3_SULT1A3_SULT_1A3.txt.gz	Weighted mode	17	1.08937	0.344802	0.00607405
13959_7_LAP3_LAP.txt.gz	finngen_R9_CHIRBIL_PRIM.gz	outcome	13959_7_LAP3_LAP.txt.gz	MR Egger	8	-0.547854	0.686737	0.455412
13959_7_LAP3_LAP.txt.gz	finngen_R9_CHIRBIL_PRIM.gz	outcome	13959_7_LAP3_LAP.txt.gz	Weighted median	8	-0.412724	0.459796	0.369387
13959_7_LAP3_LAP.txt.gz	finngen_R9_CHIRBIL_PRIM.gz	outcome	13959_7_LAP3_LAP.txt.gz	Inverse variance weighted	8	0.0260571	0.446246	0.953437
13959_7_LAP3_LAP.txt.gz	finngen_R9_CHIRBIL_PRIM.gz	outcome	13959_7_LAP3_LAP.txt.gz	Simple mode	8	-0.288469	0.778493	0.721933
13959_7_LAP3_LAP.txt.gz	finngen_R9_CHIRBIL_PRIM.gz	outcome	13959_7_LAP3_LAP.txt.gz	Weighted mode	8	-0.461222	0.496453	0.38379
13972_4_HSD17B14_DHB14.txt.gz	finngen_R9_CHIRBIL_PRIM.gz	outcome	13972_4_HSD17B14_DHB14.txt.gz	MR Egger	4	-1.16651	2.27699	0.659405
13972_4_HSD17B14_DHB14.txt.gz	finngen_R9_CHIRBIL_PRIM.gz	outcome	13972_4_HSD17B14_DHB14.txt.gz	Weighted median	4	-0.753429	0.743911	0.311158
13972_4_HSD17B14_DHB14.txt.gz	finngen_R9_CHIRBIL_PRIM.gz	outcome	13972_4_HSD17B14_DHB14.txt.gz	Inverse variance weighted	4	-0.25277	0.764668	0.740975
13972_4_HSD17B14_DHB14.txt.gz	finngen_R9_CHIRBIL_PRIM.gz	outcome	13972_4_HSD17B14_DHB14.txt.gz	Simple mode	4	-0.663856	1.17632	0.611957
13972_4_HSD17B14_DHB14.txt.gz	finngen_R9_CHIRBIL_PRIM.gz	outcome	13972_4_HSD17B14_DHB14.txt.gz	Weighted mode	4	-0.924441	0.813526	0.338375
13973_62_TTL_TTL.txt.gz	finngen_R9_CHIRBIL_PRIM.gz	outcome	13973_62_TTL_TTL.txt.gz	Wald ratio	1	0.764284	1.53601	0.618783
14047_78_BDNF_BDNF.txt.gz	finngen_R9_CHIRBIL_PRIM.gz	outcome	14047_78_BDNF_BDNF.txt.gz	Inverse variance weighted	2	-0.243299	0.555204	0.66123
14048_7_IL1RAP_IL_1_R_AcP.txt.gz	finngen_R9_CHIRBIL_PRIM.gz	outcome	14048_7_IL1RAP_IL_1_R_AcP.txt.gz	MR Egger	142	-0.102851	0.0463114	0.0279672
14048_7_IL1RAP_IL_1_R_AcP.txt.gz	finngen_R9_CHIRBIL_PRIM.gz	outcome	14048_7_IL1RAP_IL_1_R_AcP.txt.gz	Weighted median	142	-0.0510817	0.0528699	0.333955
14048_7_IL1RAP_IL_1_R_AcP.txt.gz	finngen_R9_CHIRBIL_PRIM.gz	outcome	14048_7_IL1RAP_IL_1_R_AcP.txt.gz	Inverse variance weighted	142	-0.0801423	0.0350972	0.0224043
14048_7_IL1RAP_IL_1_R_AcP.txt.gz	finngen_R9_CHIRBIL_PRIM.gz	outcome	14048_7_IL1RAP_IL_1_R_AcP.txt.gz	Simple mode	142	-0.10884	0.112669	0.33569
14048_7_IL1RAP_IL_1_R_AcP.txt.gz	finngen_R9_CHIRBIL_PRIM.gz	outcome	14048_7_IL1RAP_IL_1_R_AcP.txt.gz	Weighted mode	142	-0.078639	0.0427566	0.067986
14054_17_IL15RA_IL_15_Ra.txt.gz	finngen_R9_CHIRBIL_PRIM.gz	outcome	14054_17_IL15RA_IL_15_Ra.txt.gz	MR Egger	86	-0.0833347	0.125069	0.50704
14054_17_IL15RA_IL_15_Ra.txt.gz	finngen_R9_CHIRBIL_PRIM.gz	outcome	14054_17_IL15RA_IL_15_Ra.txt.gz	Weighted median	86	-0.0954803	0.101456	0.346652
14054_17_IL15RA_IL_15_Ra.txt.gz	finngen_R9_CHIRBIL_PRIM.gz	outcome	14054_17_IL15RA_IL_15_Ra.txt.gz	Inverse variance weighted	86	-0.0890034	0.0656704	0.175321
14054_17_IL15RA_IL_15_Ra.txt.gz	finngen_R9_CHIRBIL_PRIM.gz	outcome	14054_17_IL15RA_IL_15_Ra.txt.gz	Simple mode	86	0.120455	0.193128	0.534492
14054_17_IL15RA_IL_15_Ra.txt.gz	finngen_R9_CHIRBIL_PRIM.gz	outcome	14054_17_IL15RA_IL_15_Ra.txt.gz	Weighted mode	86	-0.110665	0.0961251	0.252853
14076_74_CST4_Cystatin_S.txt.gz	finngen_R9_CHIRBIL_PRIM.gz	outcome	14076_74_CST4_Cystatin_S.txt.gz	MR Egger	42	-0.127706	0.245723	0.606125
14076_74_CST4_Cystatin_S.txt.gz	finngen_R9_CHIRBIL_PRIM.gz	outcome	14076_74_CST4_Cystatin_S.txt.gz	Weighted median	42	-0.1814	0.180697	0.315431
14076_74_CST4_Cystatin_S.txt.gz	finngen_R9_CHIRBIL_PRIM.gz	outcome	14076_74_CST4_Cystatin_S.txt.gz	Inverse variance weighted	42	-0.0911987	0.122452	0.456409
14076_74_CST4_Cystatin_S.txt.gz	finngen_R9_CHIRBIL_PRIM.gz	outcome	14076_74_CST4_Cystatin_S.txt.gz	Simple mode	42	-0.0968047	0.288089	0.738566
14076_74_CST4_Cystatin_S.txt.gz	finngen_R9_CHIRBIL_PRIM.gz	outcome	14076_74_CST4_Cystatin_S.txt.gz	Weighted mode	42	-0.15281	0.180218	0.401407
14079_14_IL18R1_IL_18_Ra.txt.gz	finngen_R9_CHIRBIL_PRIM.gz	outcome	14079_14_IL18R1_IL_18_Ra.txt.gz	MR Egger	71	0.104719	0.12069	0.388583
14079_14_IL18R1_IL_18_Ra.txt.gz	finngen_R9_CHIRBIL_PRIM.gz	outcome	14079_14_IL18R1_IL_18_Ra.txt.gz	Weighted median	71	0.0805315	0.0892596	0.366942
14079_14_IL18R1_IL_18_Ra.txt.gz	finngen_R9_CHIRBIL_PRIM.gz	outcome	14079_14_IL18R1_IL_18_Ra.txt.gz	Inverse variance weighted	71	-0.0609443	0.0663394	0.358266
14079_14_IL18R1_IL_18_Ra.txt.gz	finngen_R9_CHIRBIL_PRIM.gz	outcome	14079_14_IL18R1_IL_18_Ra.txt.gz	Simple mode	71	0.0989813	0.153476	0.521082
14079_14_IL18R1_IL_18_Ra.txt.gz	finngen_R9_CHIRBIL_PRIM.gz	outcome	14079_14_IL18R1_IL_18_Ra.txt.gz	Weighted mode	71	0.025022	0.087739	0.776343
14091_42_CBR3_Carbonyl_reductase_3.txt.gz	finngen_R9_CHIRBIL_PRIM.gz	outcome	14091_42_CBR3_Carbonyl_reductase_3.txt.gz	MR Egger	40	0.112322	0.184018	0.54524
14091_42_CBR3_Carbonyl_reductase_3.txt.gz	finngen_R9_CHIRBIL_PRIM.gz	outcome	14091_42_CBR3_Carbonyl_reductase_3.txt.gz	Weighted median	40	0.0902604	0.127146	0.477769
14091_42_CBR3_Carbonyl_reductase_3.txt.gz	finngen_R9_CHIRBIL_PRIM.gz	outcome	14091_42_CBR3_Carbonyl_reductase_3.txt.gz	Inverse variance weighted	40	0.0401871	0.111644	0.718879
14091_42_CBR3_Carbonyl_reductase_3.txt.gz	finngen_R9_CHIRBIL_PRIM.gz	outcome	14091_42_CBR3_Carbonyl_reductase_3.txt.gz	Simple mode	40	-0.171163	0.309308	0.583166
14091_42_CBR3_Carbonyl_reductase_3.txt.gz	finngen_R9_CHIRBIL_PRIM.gz	outcome	14091_42_CBR3_Carbonyl_reductase_3.txt.gz	Weighted mode	40	0.0596974	0.116312	0.61067
14094_29_HBEGF_HB_EGF.txt.gz	finngen_R9_CHIRBIL_PRIM.gz	outcome	14094_29_HBEGF_HB_EGF.txt.gz	Wald ratio	1	0.198711	1.20751	0.869288
14100_63_C1QC_C1QC.txt.gz	finngen_R9_CHIRBIL_PRIM.gz	outcome	14100_63_C1QC_C1QC.txt.gz	MR Egger	97	0.0551942	0.0894075	0.538492
14100_63_C1QC_C1QC.txt.gz	finngen_R9_CHIRBIL_PRIM.gz	outcome	14100_63_C1QC_C1QC.txt.gz	Weighted median	97	0.146997	0.0938817	0.117403
14100_63_C1QC_C1QC.txt.gz	finngen_R9_CHIRBIL_PRIM.gz	outcome	14100_63_C1QC_C1QC.txt.gz	Inverse variance weighted	97	0.0842634	0.0563296	0.13468
14100_63_C1QC_C1QC.txt.gz	finngen_R9_CHIRBIL_PRIM.gz	outcome	14100_63_C1QC_C1QC.txt.gz	Simple mode	97	0.104197	0.177971	0.559604
14100_63_C1QC_C1QC.txt.gz	finngen_R9_CHIRBIL_PRIM.gz	outcome	14100_63_C1QC_C1QC.txt.gz	Weighted mode	97	0.164592	0.0907505	0.0728513
14101_2_CNTFR_CNTFR_alpha.txt.gz	finngen_R9_CHIRBIL_PRIM.gz	outcome	14101_2_CNTFR_CNTFR_alpha.txt.gz	MR Egger	13	0.505395	0.455618	0.290984
14101_2_CNTFR_CNTFR_alpha.txt.gz	finngen_R9_CHIRBIL_PRIM.gz	outcome	14101_2_CNTFR_CNTFR_alpha.txt.gz	Weighted median	13	0.218843	0.217083	0.313403
14101_2_CNTFR_CNTFR_alpha.txt.gz	finngen_R9_CHIRBIL_PRIM.gz	outcome	14101_2_CNTFR_CNTFR_alpha.txt.gz	Inverse variance weighted	13	0.115091	0.282666	0.68389
14101_2_CNTFR_CNTFR_alpha.txt.gz	finngen_R9_CHIRBIL_PRIM.gz	outcome	14101_2_CNTFR_CNTFR_alpha.txt.gz	Simple mode	13	-0.503386	0.522808	0.354624
14101_2_CNTFR_CNTFR_alpha.txt.gz	finngen_R9_CHIRBIL_PRIM.gz	outcome	14101_2_CNTFR_CNTFR_alpha.txt.gz	Weighted mode	13	0.151784	0.227063	0.516489
14111_15_THBS2_TSP2.txt.gz	finngen_R9_CHIRBIL_PRIM.gz	outcome	14111_15_THBS2_TSP2.txt.gz	Wald ratio	1	0.262496	0.780273	0.736557
14112_40_RELT_RELT.txt.gz	finngen_R9_CHIRBIL_PRIM.gz	outcome	14112_40_RELT_RELT.txt.gz	Wald ratio	1	1.36707	1.11125	0.218622
14123_34_C10orf54_GI24.txt.gz	finngen_R9_CHIRBIL_PRIM.gz	outcome	14123_34_C10orf54_GI24.txt.gz	MR Egger	35	0.486737	0.251541	0.0615966
14123_34_C10orf54_GI24.txt.gz	finngen_R9_CHIRBIL_PRIM.gz	outcome	14123_34_C10orf54_GI24.txt.gz	Weighted median	35	0.175247	0.176399	0.320481
14123_34_C10orf54_GI24.txt.gz	finngen_R9_CHIRBIL_PRIM.gz	outcome	14123_34_C10orf54_GI24.txt.gz	Inverse variance weighted	35	0.333028	0.142787	0.0196829
14123_34_C10orf54_GI24.txt.gz	finngen_R9_CHIRBIL_PRIM.gz	outcome	14123_34_C10orf54_GI24.txt.gz	Simple mode	35	0.11626	0.404153	0.775351
14123_34_C10orf54_GI24.txt.gz	finngen_R9_CHIRBIL_PRIM.gz	outcome	14123_34_C10orf54_GI24.txt.gz	Weighted mode	35	0.307457	0.159993	0.0630594
14133_93_IL1R2_IL_1_sRII.txt.gz	finngen_R9_CHIRBIL_PRIM.gz	outcome	14133_93_IL1R2_IL_1_sRII.txt.gz	MR Egger	64	-0.178313	0.201057	0.378571
14133_93_IL1R2_IL_1_sRII.txt.gz	finngen_R9_CHIRBIL_PRIM.gz	outcome	14133_93_IL1R2_IL_1_sRII.txt.gz	Weighted median	64	-0.148694	0.1309	0.255984
14133_93_IL1R2_IL_1_sRII.txt.gz	finngen_R9_CHIRBIL_PRIM.gz	outcome	14133_93_IL1R2_IL_1_sRII.txt.gz	Inverse variance weighted	64	-0.107222	0.0885352	0.225872
14133_93_IL1R2_IL_1_sRII.txt.gz	finngen_R9_CHIRBIL_PRIM.gz	outcome	14133_93_IL1R2_IL_1_sRII.txt.gz	Simple mode	64	-0.335422	0.267621	0.214711
14133_93_IL1R2_IL_1_sRII.txt.gz	finngen_R9_CHIRBIL_PRIM.gz	outcome	14133_93_IL1R2_IL_1_sRII.txt.gz	Weighted mode	64	-0.175809	0.154475	0.259384
14151_4_ISG15_UCRP.txt.gz	finngen_R9_CHIRBIL_PRIM.gz	outcome	14151_4_ISG15_UCRP.txt.gz	MR Egger	25	-0.706991	0.274002	0.0167329
14151_4_ISG15_UCRP.txt.gz	finngen_R9_CHIRBIL_PRIM.gz	outcome	14151_4_ISG15_UCRP.txt.gz	Weighted median	25	-0.545867	0.176614	0.00199665
14151_4_ISG15_UCRP.txt.gz	finngen_R9_CHIRBIL_PRIM.gz	outcome	14151_4_ISG15_UCRP.txt.gz	Inverse variance weighted	25	-0.452672	0.133836	0.000718824
14151_4_ISG15_UCRP.txt.gz	finngen_R9_CHIRBIL_PRIM.gz	outcome	14151_4_ISG15_UCRP.txt.gz	Simple mode	25	-0.578376	0.354483	0.115817
14151_4_ISG15_UCRP.txt.gz	finngen_R9_CHIRBIL_PRIM.gz	outcome	14151_4_ISG15_UCRP.txt.gz	Weighted mode	25	-0.545042	0.179038	0.00558468
14273_19_PREP_PPCE.txt.gz	finngen_R9_CHIRBIL_PRIM.gz	outcome	14273_19_PREP_PPCE.txt.gz	MR Egger	15	0.195651	0.533449	0.719695
14273_19_PREP_PPCE.txt.gz	finngen_R9_CHIRBIL_PRIM.gz	outcome	14273_19_PREP_PPCE.txt.gz	Weighted median	15	0.19107	0.298867	0.522618
14273_19_PREP_PPCE.txt.gz	finngen_R9_CHIRBIL_PRIM.gz	outcome	14273_19_PREP_PPCE.txt.gz	Inverse variance weighted	15	-0.0737254	0.225333	0.743528
14273_19_PREP_PPCE.txt.gz	finngen_R9_CHIRBIL_PRIM.gz	outcome	14273_19_PREP_PPCE.txt.gz	Simple mode	15	0.151544	0.48132	0.757519
14273_19_PREP_PPCE.txt.gz	finngen_R9_CHIRBIL_PRIM.gz	outcome	14273_19_PREP_PPCE.txt.gz	Weighted mode	15	0.22939	0.326481	0.493815
14684_17_CAPN2_CAN2.txt.gz	finngen_R9_CHIRBIL_PRIM.gz	outcome	14684_17_CAPN2_CAN2.txt.gz	MR Egger	14	0.187011	0.395896	0.645135
14684_17_CAPN2_CAN2.txt.gz	finngen_R9_CHIRBIL_PRIM.gz	outcome	14684_17_CAPN2_CAN2.txt.gz	Weighted median	14	0.0559176	0.286191	0.845091
14684_17_CAPN2_CAN2.txt.gz	finngen_R9_CHIRBIL_PRIM.gz	outcome	14684_17_CAPN2_CAN2.txt.gz	Inverse variance weighted	14	-0.0482001	0.267387	0.856946
14684_17_CAPN2_CAN2.txt.gz	finngen_R9_CHIRBIL_PRIM.gz	outcome	14684_17_CAPN2_CAN2.txt.gz	Simple mode	14	0.174145	0.590187	0.772602
14684_17_CAPN2_CAN2.txt.gz	finngen_R9_CHIRBIL_PRIM.gz	outcome	14684_17_CAPN2_CAN2.txt.gz	Weighted mode	14	0.071191	0.29896	0.815493
14688_6_PTPN7_PTN7.txt.gz	finngen_R9_CHIRBIL_PRIM.gz	outcome	14688_6_PTPN7_PTN7.txt.gz	MR Egger	3	-2.91415	7.90203	0.775075
14688_6_PTPN7_PTN7.txt.gz	finngen_R9_CHIRBIL_PRIM.gz	outcome	14688_6_PTPN7_PTN7.txt.gz	Weighted median	3	-0.304314	0.895626	0.734024
14688_6_PTPN7_PTN7.txt.gz	finngen_R9_CHIRBIL_PRIM.gz	outcome	14688_6_PTPN7_PTN7.txt.gz	Inverse variance weighted	3	-0.349055	0.828527	0.673538
14688_6_PTPN7_PTN7.txt.gz	finngen_R9_CHIRBIL_PRIM.gz	outcome	14688_6_PTPN7_PTN7.txt.gz	Simple mode	3	-0.319197	0.950795	0.769032
14688_6_PTPN7_PTN7.txt.gz	finngen_R9_CHIRBIL_PRIM.gz	outcome	14688_6_PTPN7_PTN7.txt.gz	Weighted mode	3	-0.290704	0.937943	0.785922
14708_59_C8G_CO8G.txt.gz	finngen_R9_CHIRBIL_PRIM.gz	outcome	14708_59_C8G_CO8G.txt.gz	MR Egger	77	0.204857	0.167877	0.226181
14708_59_C8G_CO8G.txt.gz	finngen_R9_CHIRBIL_PRIM.gz	outcome	14708_59_C8G_CO8G.txt.gz	Weighted median	77	-0.0297703	0.14012	0.831746
14708_59_C8G_CO8G.txt.gz	finngen_R9_CHIRBIL_PRIM.gz	outcome	14708_59_C8G_CO8G.txt.gz	Inverse variance weighted	77	0.139149	0.0949502	0.142785
14708_59_C8G_CO8G.txt.gz	finngen_R9_CHIRBIL_PRIM.gz	outcome	14708_59_C8G_CO8G.txt.gz	Simple mode	77	-0.020625	0.279185	0.941303
14708_59_C8G_CO8G.txt.gz	finngen_R9_CHIRBIL_PRIM.gz	outcome	14708_59_C8G_CO8G.txt.gz	Weighted mode	77	0.0239514	0.13011	0.854437
14711_27_CST6_Cystatin_M.txt.gz	finngen_R9_CHIRBIL_PRIM.gz	outcome	14711_27_CST6_Cystatin_M.txt.gz	MR Egger	6	0.815731	0.382668	0.100017
14711_27_CST6_Cystatin_M.txt.gz	finngen_R9_CHIRBIL_PRIM.gz	outcome	14711_27_CST6_Cystatin_M.txt.gz	Weighted median	6	0.824557	0.277139	0.00292757
14711_27_CST6_Cystatin_M.txt.gz	finngen_R9_CHIRBIL_PRIM.gz	outcome	14711_27_CST6_Cystatin_M.txt.gz	Inverse variance weighted	6	0.773466	0.262618	0.00322734
14711_27_CST6_Cystatin_M.txt.gz	finngen_R9_CHIRBIL_PRIM.gz	outcome	14711_27_CST6_Cystatin_M.txt.gz	Simple mode	6	0.819737	0.456534	0.132512
14711_27_CST6_Cystatin_M.txt.gz	finngen_R9_CHIRBIL_PRIM.gz	outcome	14711_27_CST6_Cystatin_M.txt.gz	Weighted mode	6	0.840065	0.284627	0.0318315
14747_9_CRLF1_CRLF1.txt.gz	finngen_R9_CHIRBIL_PRIM.gz	outcome	14747_9_CRLF1_CRLF1.txt.gz	MR Egger	27	0.443476	0.331027	0.192395
14747_9_CRLF1_CRLF1.txt.gz	finngen_R9_CHIRBIL_PRIM.gz	outcome	14747_9_CRLF1_CRLF1.txt.gz	Weighted median	27	0.313835	0.238406	0.188044
14747_9_CRLF1_CRLF1.txt.gz	finngen_R9_CHIRBIL_PRIM.gz	outcome	14747_9_CRLF1_CRLF1.txt.gz	Inverse variance weighted	27	0.325189	0.157839	0.0393741
14747_9_CRLF1_CRLF1.txt.gz	finngen_R9_CHIRBIL_PRIM.gz	outcome	14747_9_CRLF1_CRLF1.txt.gz	Simple mode	27	0.768964	0.422766	0.0804655
14747_9_CRLF1_CRLF1.txt.gz	finngen_R9_CHIRBIL_PRIM.gz	outcome	14747_9_CRLF1_CRLF1.txt.gz	Weighted mode	27	0.32977	0.235142	0.172614
15304_1_REG3A_PAP1.txt.gz	finngen_R9_CHIRBIL_PRIM.gz	outcome	15304_1_REG3A_PAP1.txt.gz	MR Egger	34	-0.396638	0.273638	0.156929
15304_1_REG3A_PAP1.txt.gz	finngen_R9_CHIRBIL_PRIM.gz	outcome	15304_1_REG3A_PAP1.txt.gz	Weighted median	34	-0.169838	0.228316	0.456953
15304_1_REG3A_PAP1.txt.gz	finngen_R9_CHIRBIL_PRIM.gz	outcome	15304_1_REG3A_PAP1.txt.gz	Inverse variance weighted	34	-0.126727	0.14716	0.389156
15304_1_REG3A_PAP1.txt.gz	finngen_R9_CHIRBIL_PRIM.gz	outcome	15304_1_REG3A_PAP1.txt.gz	Simple mode	34	-0.32172	0.37979	0.403041
15304_1_REG3A_PAP1.txt.gz	finngen_R9_CHIRBIL_PRIM.gz	outcome	15304_1_REG3A_PAP1.txt.gz	Weighted mode	34	-0.145348	0.248574	0.562707
15305_7_SCGN_Secretagogin.txt.gz	finngen_R9_CHIRBIL_PRIM.gz	outcome	15305_7_SCGN_Secretagogin.txt.gz	MR Egger	3	-0.147648	6.21247	0.984873
15305_7_SCGN_Secretagogin.txt.gz	finngen_R9_CHIRBIL_PRIM.gz	outcome	15305_7_SCGN_Secretagogin.txt.gz	Weighted median	3	-0.976913	0.815851	0.231145
15305_7_SCGN_Secretagogin.txt.gz	finngen_R9_CHIRBIL_PRIM.gz	outcome	15305_7_SCGN_Secretagogin.txt.gz	Inverse variance weighted	3	-0.646306	0.705677	0.359737
15305_7_SCGN_Secretagogin.txt.gz	finngen_R9_CHIRBIL_PRIM.gz	outcome	15305_7_SCGN_Secretagogin.txt.gz	Simple mode	3	-1.01584	1.04861	0.434869
15305_7_SCGN_Secretagogin.txt.gz	finngen_R9_CHIRBIL_PRIM.gz	outcome	15305_7_SCGN_Secretagogin.txt.gz	Weighted mode	3	-1.0994	0.814605	0.309609
15308_108_VWC2_VWC2.txt.gz	finngen_R9_CHIRBIL_PRIM.gz	outcome	15308_108_VWC2_VWC2.txt.gz	MR Egger	44	0.0960698	0.231192	0.679861
15308_108_VWC2_VWC2.txt.gz	finngen_R9_CHIRBIL_PRIM.gz	outcome	15308_108_VWC2_VWC2.txt.gz	Weighted median	44	0.0884554	0.17218	0.607435
15308_108_VWC2_VWC2.txt.gz	finngen_R9_CHIRBIL_PRIM.gz	outcome	15308_108_VWC2_VWC2.txt.gz	Inverse variance weighted	44	0.075925	0.120392	0.528271
15308_108_VWC2_VWC2.txt.gz	finngen_R9_CHIRBIL_PRIM.gz	outcome	15308_108_VWC2_VWC2.txt.gz	Simple mode	44	0.0383913	0.292486	0.896183
15308_108_VWC2_VWC2.txt.gz	finngen_R9_CHIRBIL_PRIM.gz	outcome	15308_108_VWC2_VWC2.txt.gz	Weighted mode	44	0.0819086	0.18873	0.66646
15333_11_SDF2_SDF2.txt.gz	finngen_R9_CHIRBIL_PRIM.gz	outcome	15333_11_SDF2_SDF2.txt.gz	MR Egger	20	0.413167	0.429979	0.349334
15333_11_SDF2_SDF2.txt.gz	finngen_R9_CHIRBIL_PRIM.gz	outcome	15333_11_SDF2_SDF2.txt.gz	Weighted median	20	0.435373	0.223926	0.0518624
15333_11_SDF2_SDF2.txt.gz	finngen_R9_CHIRBIL_PRIM.gz	outcome	15333_11_SDF2_SDF2.txt.gz	Inverse variance weighted	20	0.380693	0.172582	0.0273933
15333_11_SDF2_SDF2.txt.gz	finngen_R9_CHIRBIL_PRIM.gz	outcome	15333_11_SDF2_SDF2.txt.gz	Simple mode	20	0.330409	0.411117	0.43152
15333_11_SDF2_SDF2.txt.gz	finngen_R9_CHIRBIL_PRIM.gz	outcome	15333_11_SDF2_SDF2.txt.gz	Weighted mode	20	0.395963	0.234065	0.107043
15343_337_KNG1_Kininogen__HMW__Two_Chain.txt.gz	finngen_R9_CHIRBIL_PRIM.gz	outcome	15343_337_KNG1_Kininogen__HMW__Two_Chain.txt.gz	MR Egger	45	-0.193904	0.147049	0.194272
15343_337_KNG1_Kininogen__HMW__Two_Chain.txt.gz	finngen_R9_CHIRBIL_PRIM.gz	outcome	15343_337_KNG1_Kininogen__HMW__Two_Chain.txt.gz	Weighted median	45	-0.0484933	0.128841	0.706634
15343_337_KNG1_Kininogen__HMW__Two_Chain.txt.gz	finngen_R9_CHIRBIL_PRIM.gz	outcome	15343_337_KNG1_Kininogen__HMW__Two_Chain.txt.gz	Inverse variance weighted	45	0.015484	0.0980803	0.874559
15343_337_KNG1_Kininogen__HMW__Two_Chain.txt.gz	finngen_R9_CHIRBIL_PRIM.gz	outcome	15343_337_KNG1_Kininogen__HMW__Two_Chain.txt.gz	Simple mode	45	-0.0437781	0.254586	0.864259
15343_337_KNG1_Kininogen__HMW__Two_Chain.txt.gz	finngen_R9_CHIRBIL_PRIM.gz	outcome	15343_337_KNG1_Kininogen__HMW__Two_Chain.txt.gz	Weighted mode	45	-0.0890393	0.104614	0.399311
15363_32_APOA5_Apo_A_V.txt.gz	finngen_R9_CHIRBIL_PRIM.gz	outcome	15363_32_APOA5_Apo_A_V.txt.gz	MR Egger	72	0.130524	0.0912014	0.156832
15363_32_APOA5_Apo_A_V.txt.gz	finngen_R9_CHIRBIL_PRIM.gz	outcome	15363_32_APOA5_Apo_A_V.txt.gz	Weighted median	72	0.0824255	0.0882489	0.350298
15363_32_APOA5_Apo_A_V.txt.gz	finngen_R9_CHIRBIL_PRIM.gz	outcome	15363_32_APOA5_Apo_A_V.txt.gz	Inverse variance weighted	72	0.088941	0.062567	0.155162
15363_32_APOA5_Apo_A_V.txt.gz	finngen_R9_CHIRBIL_PRIM.gz	outcome	15363_32_APOA5_Apo_A_V.txt.gz	Simple mode	72	0.26693	0.144202	0.0683162
15363_32_APOA5_Apo_A_V.txt.gz	finngen_R9_CHIRBIL_PRIM.gz	outcome	15363_32_APOA5_Apo_A_V.txt.gz	Weighted mode	72	0.11436	0.0802899	0.15873
15364_101_APOC1_Apo_C_I.txt.gz	finngen_R9_CHIRBIL_PRIM.gz	outcome	15364_101_APOC1_Apo_C_I.txt.gz	MR Egger	38	-0.250082	0.278504	0.375181
15364_101_APOC1_Apo_C_I.txt.gz	finngen_R9_CHIRBIL_PRIM.gz	outcome	15364_101_APOC1_Apo_C_I.txt.gz	Weighted median	38	0.0674277	0.197853	0.733256
15364_101_APOC1_Apo_C_I.txt.gz	finngen_R9_CHIRBIL_PRIM.gz	outcome	15364_101_APOC1_Apo_C_I.txt.gz	Inverse variance weighted	38	0.0582117	0.140198	0.677987
15364_101_APOC1_Apo_C_I.txt.gz	finngen_R9_CHIRBIL_PRIM.gz	outcome	15364_101_APOC1_Apo_C_I.txt.gz	Simple mode	38	0.212947	0.337184	0.531568
15364_101_APOC1_Apo_C_I.txt.gz	finngen_R9_CHIRBIL_PRIM.gz	outcome	15364_101_APOC1_Apo_C_I.txt.gz	Weighted mode	38	0.0369902	0.256307	0.886031
15367_38_BPIFB1_LPLC1.txt.gz	finngen_R9_CHIRBIL_PRIM.gz	outcome	15367_38_BPIFB1_LPLC1.txt.gz	MR Egger	56	0.257274	0.172007	0.14055
15367_38_BPIFB1_LPLC1.txt.gz	finngen_R9_CHIRBIL_PRIM.gz	outcome	15367_38_BPIFB1_LPLC1.txt.gz	Weighted median	56	-0.0127335	0.130459	0.922246
15367_38_BPIFB1_LPLC1.txt.gz	finngen_R9_CHIRBIL_PRIM.gz	outcome	15367_38_BPIFB1_LPLC1.txt.gz	Inverse variance weighted	56	0.0846325	0.0879713	0.336026
15367_38_BPIFB1_LPLC1.txt.gz	finngen_R9_CHIRBIL_PRIM.gz	outcome	15367_38_BPIFB1_LPLC1.txt.gz	Simple mode	56	-0.23544	0.255579	0.360969
15367_38_BPIFB1_LPLC1.txt.gz	finngen_R9_CHIRBIL_PRIM.gz	outcome	15367_38_BPIFB1_LPLC1.txt.gz	Weighted mode	56	-0.0468266	0.120375	0.698773
15368_3_BMPER_BMPER.txt.gz	finngen_R9_CHIRBIL_PRIM.gz	outcome	15368_3_BMPER_BMPER.txt.gz	MR Egger	12	-0.375124	0.682523	0.594645
15368_3_BMPER_BMPER.txt.gz	finngen_R9_CHIRBIL_PRIM.gz	outcome	15368_3_BMPER_BMPER.txt.gz	Weighted median	12	-0.388259	0.322525	0.228663
15368_3_BMPER_BMPER.txt.gz	finngen_R9_CHIRBIL_PRIM.gz	outcome	15368_3_BMPER_BMPER.txt.gz	Inverse variance weighted	12	-0.332914	0.255147	0.191963
15368_3_BMPER_BMPER.txt.gz	finngen_R9_CHIRBIL_PRIM.gz	outcome	15368_3_BMPER_BMPER.txt.gz	Simple mode	12	-0.199458	0.455022	0.669617
15368_3_BMPER_BMPER.txt.gz	finngen_R9_CHIRBIL_PRIM.gz	outcome	15368_3_BMPER_BMPER.txt.gz	Weighted mode	12	-0.334445	0.334516	0.338899
15370_5_BOLA1_BOLA1.txt.gz	finngen_R9_CHIRBIL_PRIM.gz	outcome	15370_5_BOLA1_BOLA1.txt.gz	MR Egger	18	-0.00846287	0.163108	0.959262
15370_5_BOLA1_BOLA1.txt.gz	finngen_R9_CHIRBIL_PRIM.gz	outcome	15370_5_BOLA1_BOLA1.txt.gz	Weighted median	18	-0.0381903	0.129043	0.767269
15370_5_BOLA1_BOLA1.txt.gz	finngen_R9_CHIRBIL_PRIM.gz	outcome	15370_5_BOLA1_BOLA1.txt.gz	Inverse variance weighted	18	0.0129309	0.1181	0.912813
15370_5_BOLA1_BOLA1.txt.gz	finngen_R9_CHIRBIL_PRIM.gz	outcome	15370_5_BOLA1_BOLA1.txt.gz	Simple mode	18	0.244421	0.274473	0.385622
15370_5_BOLA1_BOLA1.txt.gz	finngen_R9_CHIRBIL_PRIM.gz	outcome	15370_5_BOLA1_BOLA1.txt.gz	Weighted mode	18	-0.0222368	0.124619	0.860488
15375_49_CPB1_Carboxypeptidase_B1.txt.gz	finngen_R9_CHIRBIL_PRIM.gz	outcome	15375_49_CPB1_Carboxypeptidase_B1.txt.gz	MR Egger	11	-0.268847	0.508286	0.609651
15375_49_CPB1_Carboxypeptidase_B1.txt.gz	finngen_R9_CHIRBIL_PRIM.gz	outcome	15375_49_CPB1_Carboxypeptidase_B1.txt.gz	Weighted median	11	-0.0794418	0.288206	0.782823
15375_49_CPB1_Carboxypeptidase_B1.txt.gz	finngen_R9_CHIRBIL_PRIM.gz	outcome	15375_49_CPB1_Carboxypeptidase_B1.txt.gz	Inverse variance weighted	11	0.108226	0.254789	0.671008
15375_49_CPB1_Carboxypeptidase_B1.txt.gz	finngen_R9_CHIRBIL_PRIM.gz	outcome	15375_49_CPB1_Carboxypeptidase_B1.txt.gz	Simple mode	11	-0.376364	0.746207	0.624929
15375_49_CPB1_Carboxypeptidase_B1.txt.gz	finngen_R9_CHIRBIL_PRIM.gz	outcome	15375_49_CPB1_Carboxypeptidase_B1.txt.gz	Weighted mode	11	-0.137633	0.295872	0.651769
15376_134_CTSE_CATE.txt.gz	finngen_R9_CHIRBIL_PRIM.gz	outcome	15376_134_CTSE_CATE.txt.gz	MR Egger	12	0.0386294	0.195739	0.847506
15376_134_CTSE_CATE.txt.gz	finngen_R9_CHIRBIL_PRIM.gz	outcome	15376_134_CTSE_CATE.txt.gz	Weighted median	12	-0.0178714	0.149631	0.90493
15376_134_CTSE_CATE.txt.gz	finngen_R9_CHIRBIL_PRIM.gz	outcome	15376_134_CTSE_CATE.txt.gz	Inverse variance weighted	12	-0.0764554	0.129057	0.553573
15376_134_CTSE_CATE.txt.gz	finngen_R9_CHIRBIL_PRIM.gz	outcome	15376_134_CTSE_CATE.txt.gz	Simple mode	12	-0.196089	0.287723	0.509638
15376_134_CTSE_CATE.txt.gz	finngen_R9_CHIRBIL_PRIM.gz	outcome	15376_134_CTSE_CATE.txt.gz	Weighted mode	12	-0.0138739	0.14407	0.925015
15384_15_KL_KLOTHO.txt.gz	finngen_R9_CHIRBIL_PRIM.gz	outcome	15384_15_KL_KLOTHO.txt.gz	MR Egger	24	-0.476285	0.333098	0.166804
15384_15_KL_KLOTHO.txt.gz	finngen_R9_CHIRBIL_PRIM.gz	outcome	15384_15_KL_KLOTHO.txt.gz	Weighted median	24	-0.432783	0.24595	0.0784699
15384_15_KL_KLOTHO.txt.gz	finngen_R9_CHIRBIL_PRIM.gz	outcome	15384_15_KL_KLOTHO.txt.gz	Inverse variance weighted	24	-0.27823	0.163452	0.0887158
15384_15_KL_KLOTHO.txt.gz	finngen_R9_CHIRBIL_PRIM.gz	outcome	15384_15_KL_KLOTHO.txt.gz	Simple mode	24	0.134207	0.465516	0.775702
15384_15_KL_KLOTHO.txt.gz	finngen_R9_CHIRBIL_PRIM.gz	outcome	15384_15_KL_KLOTHO.txt.gz	Weighted mode	24	-0.537564	0.335263	0.12249
15385_116_FABP2_FABP2.txt.gz	finngen_R9_CHIRBIL_PRIM.gz	outcome	15385_116_FABP2_FABP2.txt.gz	MR Egger	89	0.225237	0.102457	0.0305772
15385_116_FABP2_FABP2.txt.gz	finngen_R9_CHIRBIL_PRIM.gz	outcome	15385_116_FABP2_FABP2.txt.gz	Weighted median	89	0.0973912	0.077522	0.209006
15385_116_FABP2_FABP2.txt.gz	finngen_R9_CHIRBIL_PRIM.gz	outcome	15385_116_FABP2_FABP2.txt.gz	Inverse variance weighted	89	0.0525383	0.0537648	0.328476
15385_116_FABP2_FABP2.txt.gz	finngen_R9_CHIRBIL_PRIM.gz	outcome	15385_116_FABP2_FABP2.txt.gz	Simple mode	89	-0.0278621	0.13593	0.838066
15385_116_FABP2_FABP2.txt.gz	finngen_R9_CHIRBIL_PRIM.gz	outcome	15385_116_FABP2_FABP2.txt.gz	Weighted mode	89	0.122139	0.0790146	0.125747
15388_24_FCGR3A_FcRIIIa.txt.gz	finngen_R9_CHIRBIL_PRIM.gz	outcome	15388_24_FCGR3A_FcRIIIa.txt.gz	MR Egger	176	-0.0521121	0.0632206	0.410903
15388_24_FCGR3A_FcRIIIa.txt.gz	finngen_R9_CHIRBIL_PRIM.gz	outcome	15388_24_FCGR3A_FcRIIIa.txt.gz	Weighted median	176	-0.0579116	0.0531634	0.276015
15388_24_FCGR3A_FcRIIIa.txt.gz	finngen_R9_CHIRBIL_PRIM.gz	outcome	15388_24_FCGR3A_FcRIIIa.txt.gz	Inverse variance weighted	176	-0.0145918	0.0338047	0.665996
15388_24_FCGR3A_FcRIIIa.txt.gz	finngen_R9_CHIRBIL_PRIM.gz	outcome	15388_24_FCGR3A_FcRIIIa.txt.gz	Simple mode	176	0.148583	0.10813	0.171164
15388_24_FCGR3A_FcRIIIa.txt.gz	finngen_R9_CHIRBIL_PRIM.gz	outcome	15388_24_FCGR3A_FcRIIIa.txt.gz	Weighted mode	176	-0.131251	0.0619972	0.0356689
15391_114_GAS6_GAS_6.txt.gz	finngen_R9_CHIRBIL_PRIM.gz	outcome	15391_114_GAS6_GAS_6.txt.gz	MR Egger	25	-0.171097	0.324617	0.60319
15391_114_GAS6_GAS_6.txt.gz	finngen_R9_CHIRBIL_PRIM.gz	outcome	15391_114_GAS6_GAS_6.txt.gz	Weighted median	25	-0.232509	0.230371	0.31284
15391_114_GAS6_GAS_6.txt.gz	finngen_R9_CHIRBIL_PRIM.gz	outcome	15391_114_GAS6_GAS_6.txt.gz	Inverse variance weighted	25	-0.316207	0.160112	0.0482779
15391_114_GAS6_GAS_6.txt.gz	finngen_R9_CHIRBIL_PRIM.gz	outcome	15391_114_GAS6_GAS_6.txt.gz	Simple mode	25	-0.196641	0.395919	0.623941
15391_114_GAS6_GAS_6.txt.gz	finngen_R9_CHIRBIL_PRIM.gz	outcome	15391_114_GAS6_GAS_6.txt.gz	Weighted mode	25	-0.224433	0.221917	0.321943
15395_15_GSTM1_GST_M1_1.txt.gz	finngen_R9_CHIRBIL_PRIM.gz	outcome	15395_15_GSTM1_GST_M1_1.txt.gz	MR Egger	132	0.0136605	0.0671595	0.839138
15395_15_GSTM1_GST_M1_1.txt.gz	finngen_R9_CHIRBIL_PRIM.gz	outcome	15395_15_GSTM1_GST_M1_1.txt.gz	Weighted median	132	-0.0129956	0.0731399	0.858973
15395_15_GSTM1_GST_M1_1.txt.gz	finngen_R9_CHIRBIL_PRIM.gz	outcome	15395_15_GSTM1_GST_M1_1.txt.gz	Inverse variance weighted	132	-0.0666535	0.0460969	0.148193
15395_15_GSTM1_GST_M1_1.txt.gz	finngen_R9_CHIRBIL_PRIM.gz	outcome	15395_15_GSTM1_GST_M1_1.txt.gz	Simple mode	132	-0.0872952	0.136199	0.522682
15395_15_GSTM1_GST_M1_1.txt.gz	finngen_R9_CHIRBIL_PRIM.gz	outcome	15395_15_GSTM1_GST_M1_1.txt.gz	Weighted mode	132	-0.041737	0.0657938	0.526952
15398_2_GFER_HERV1.txt.gz	finngen_R9_CHIRBIL_PRIM.gz	outcome	15398_2_GFER_HERV1.txt.gz	Wald ratio	1	1.09099	1.07232	0.308955
15414_316_LDHA_LDHA.txt.gz	finngen_R9_CHIRBIL_PRIM.gz	outcome	15414_316_LDHA_LDHA.txt.gz	Inverse variance weighted	2	-1.12399	0.902913	0.213189
15417_3_SERPINB5_Maspin.txt.gz	finngen_R9_CHIRBIL_PRIM.gz	outcome	15417_3_SERPINB5_Maspin.txt.gz	MR Egger	5	0.366642	0.846115	0.694046
15417_3_SERPINB5_Maspin.txt.gz	finngen_R9_CHIRBIL_PRIM.gz	outcome	15417_3_SERPINB5_Maspin.txt.gz	Weighted median	5	-0.00177267	0.418604	0.996621
15417_3_SERPINB5_Maspin.txt.gz	finngen_R9_CHIRBIL_PRIM.gz	outcome	15417_3_SERPINB5_Maspin.txt.gz	Inverse variance weighted	5	0.0440794	0.392641	0.910614
15417_3_SERPINB5_Maspin.txt.gz	finngen_R9_CHIRBIL_PRIM.gz	outcome	15417_3_SERPINB5_Maspin.txt.gz	Simple mode	5	-0.3497	0.737247	0.659997
15417_3_SERPINB5_Maspin.txt.gz	finngen_R9_CHIRBIL_PRIM.gz	outcome	15417_3_SERPINB5_Maspin.txt.gz	Weighted mode	5	0.0100008	0.456228	0.983561
15427_35_LOXL3_LOXL3.txt.gz	finngen_R9_CHIRBIL_PRIM.gz	outcome	15427_35_LOXL3_LOXL3.txt.gz	Inverse variance weighted	2	0.537351	0.709026	0.448528
15435_4_PNP_PNP.txt.gz	finngen_R9_CHIRBIL_PRIM.gz	outcome	15435_4_PNP_PNP.txt.gz	MR Egger	10	-0.726059	0.555085	0.2272
15435_4_PNP_PNP.txt.gz	finngen_R9_CHIRBIL_PRIM.gz	outcome	15435_4_PNP_PNP.txt.gz	Weighted median	10	-0.526442	0.343535	0.125417
15435_4_PNP_PNP.txt.gz	finngen_R9_CHIRBIL_PRIM.gz	outcome	15435_4_PNP_PNP.txt.gz	Inverse variance weighted	10	-0.530871	0.268124	0.0477091
15435_4_PNP_PNP.txt.gz	finngen_R9_CHIRBIL_PRIM.gz	outcome	15435_4_PNP_PNP.txt.gz	Simple mode	10	-0.544146	0.515256	0.318459
15435_4_PNP_PNP.txt.gz	finngen_R9_CHIRBIL_PRIM.gz	outcome	15435_4_PNP_PNP.txt.gz	Weighted mode	10	-0.574452	0.405356	0.190112
15440_57_PCSK2_NEC2.txt.gz	finngen_R9_CHIRBIL_PRIM.gz	outcome	15440_57_PCSK2_NEC2.txt.gz	MR Egger	5	-1.62527	3.14002	0.640486
15440_57_PCSK2_NEC2.txt.gz	finngen_R9_CHIRBIL_PRIM.gz	outcome	15440_57_PCSK2_NEC2.txt.gz	Weighted median	5	-0.933507	0.635769	0.14202
15440_57_PCSK2_NEC2.txt.gz	finngen_R9_CHIRBIL_PRIM.gz	outcome	15440_57_PCSK2_NEC2.txt.gz	Inverse variance weighted	5	-0.888993	0.569667	0.11863
15440_57_PCSK2_NEC2.txt.gz	finngen_R9_CHIRBIL_PRIM.gz	outcome	15440_57_PCSK2_NEC2.txt.gz	Simple mode	5	-1.5371	0.893306	0.160422
15440_57_PCSK2_NEC2.txt.gz	finngen_R9_CHIRBIL_PRIM.gz	outcome	15440_57_PCSK2_NEC2.txt.gz	Weighted mode	5	-1.14655	0.735212	0.193892
15444_45_SERPINB4_SCCA2.txt.gz	finngen_R9_CHIRBIL_PRIM.gz	outcome	15444_45_SERPINB4_SCCA2.txt.gz	MR Egger	13	-0.160337	0.399691	0.69599
15444_45_SERPINB4_SCCA2.txt.gz	finngen_R9_CHIRBIL_PRIM.gz	outcome	15444_45_SERPINB4_SCCA2.txt.gz	Weighted median	13	-0.195786	0.346891	0.57248
15444_45_SERPINB4_SCCA2.txt.gz	finngen_R9_CHIRBIL_PRIM.gz	outcome	15444_45_SERPINB4_SCCA2.txt.gz	Inverse variance weighted	13	0.130543	0.26036	0.616093
15444_45_SERPINB4_SCCA2.txt.gz	finngen_R9_CHIRBIL_PRIM.gz	outcome	15444_45_SERPINB4_SCCA2.txt.gz	Simple mode	13	1.1154	0.661703	0.117667
15444_45_SERPINB4_SCCA2.txt.gz	finngen_R9_CHIRBIL_PRIM.gz	outcome	15444_45_SERPINB4_SCCA2.txt.gz	Weighted mode	13	-0.372042	0.398052	0.368393
15447_45_SORD_Sorbitol_dehydrogenase.txt.gz	finngen_R9_CHIRBIL_PRIM.gz	outcome	15447_45_SORD_Sorbitol_dehydrogenase.txt.gz	MR Egger	33	0.320424	0.285083	0.269655
15447_45_SORD_Sorbitol_dehydrogenase.txt.gz	finngen_R9_CHIRBIL_PRIM.gz	outcome	15447_45_SORD_Sorbitol_dehydrogenase.txt.gz	Weighted median	33	0.147759	0.247147	0.549936
15447_45_SORD_Sorbitol_dehydrogenase.txt.gz	finngen_R9_CHIRBIL_PRIM.gz	outcome	15447_45_SORD_Sorbitol_dehydrogenase.txt.gz	Inverse variance weighted	33	0.210275	0.161396	0.192626
15447_45_SORD_Sorbitol_dehydrogenase.txt.gz	finngen_R9_CHIRBIL_PRIM.gz	outcome	15447_45_SORD_Sorbitol_dehydrogenase.txt.gz	Simple mode	33	0.620216	0.383318	0.115475
15447_45_SORD_Sorbitol_dehydrogenase.txt.gz	finngen_R9_CHIRBIL_PRIM.gz	outcome	15447_45_SORD_Sorbitol_dehydrogenase.txt.gz	Weighted mode	33	0.1244	0.235874	0.601554
15452_5_NT5E_5__Nucleotidase.txt.gz	finngen_R9_CHIRBIL_PRIM.gz	outcome	15452_5_NT5E_5__Nucleotidase.txt.gz	MR Egger	46	0.303451	0.195771	0.128298
15452_5_NT5E_5__Nucleotidase.txt.gz	finngen_R9_CHIRBIL_PRIM.gz	outcome	15452_5_NT5E_5__Nucleotidase.txt.gz	Weighted median	46	0.306308	0.147569	0.0379218
15452_5_NT5E_5__Nucleotidase.txt.gz	finngen_R9_CHIRBIL_PRIM.gz	outcome	15452_5_NT5E_5__Nucleotidase.txt.gz	Inverse variance weighted	46	0.315754	0.106129	0.00292797
15452_5_NT5E_5__Nucleotidase.txt.gz	finngen_R9_CHIRBIL_PRIM.gz	outcome	15452_5_NT5E_5__Nucleotidase.txt.gz	Simple mode	46	0.0165735	0.276377	0.952447
15452_5_NT5E_5__Nucleotidase.txt.gz	finngen_R9_CHIRBIL_PRIM.gz	outcome	15452_5_NT5E_5__Nucleotidase.txt.gz	Weighted mode	46	0.268461	0.134908	0.0526918
15453_3_AMBP_a1_Microglobulin.txt.gz	finngen_R9_CHIRBIL_PRIM.gz	outcome	15453_3_AMBP_a1_Microglobulin.txt.gz	MR Egger	6	0.967452	1.26527	0.487116
15453_3_AMBP_a1_Microglobulin.txt.gz	finngen_R9_CHIRBIL_PRIM.gz	outcome	15453_3_AMBP_a1_Microglobulin.txt.gz	Weighted median	6	-0.157464	0.495364	0.75058
15453_3_AMBP_a1_Microglobulin.txt.gz	finngen_R9_CHIRBIL_PRIM.gz	outcome	15453_3_AMBP_a1_Microglobulin.txt.gz	Inverse variance weighted	6	-0.335612	0.400479	0.402015
15453_3_AMBP_a1_Microglobulin.txt.gz	finngen_R9_CHIRBIL_PRIM.gz	outcome	15453_3_AMBP_a1_Microglobulin.txt.gz	Simple mode	6	-0.344224	0.720025	0.652769
15453_3_AMBP_a1_Microglobulin.txt.gz	finngen_R9_CHIRBIL_PRIM.gz	outcome	15453_3_AMBP_a1_Microglobulin.txt.gz	Weighted mode	6	-0.0796111	0.552642	0.891083
15462_28_CD8A_CD8A.txt.gz	finngen_R9_CHIRBIL_PRIM.gz	outcome	15462_28_CD8A_CD8A.txt.gz	MR Egger	31	-0.350728	0.282376	0.224165
15462_28_CD8A_CD8A.txt.gz	finngen_R9_CHIRBIL_PRIM.gz	outcome	15462_28_CD8A_CD8A.txt.gz	Weighted median	31	0.00201745	0.196099	0.991792
15462_28_CD8A_CD8A.txt.gz	finngen_R9_CHIRBIL_PRIM.gz	outcome	15462_28_CD8A_CD8A.txt.gz	Inverse variance weighted	31	-0.0599174	0.175635	0.732992
15462_28_CD8A_CD8A.txt.gz	finngen_R9_CHIRBIL_PRIM.gz	outcome	15462_28_CD8A_CD8A.txt.gz	Simple mode	31	0.22738	0.405576	0.57921
15462_28_CD8A_CD8A.txt.gz	finngen_R9_CHIRBIL_PRIM.gz	outcome	15462_28_CD8A_CD8A.txt.gz	Weighted mode	31	-0.108668	0.201574	0.593797
15466_30_COL9A1_CO9A1.txt.gz	finngen_R9_CHIRBIL_PRIM.gz	outcome	15466_30_COL9A1_CO9A1.txt.gz	MR Egger	5	0.812529	3.00906	0.804649
15466_30_COL9A1_CO9A1.txt.gz	finngen_R9_CHIRBIL_PRIM.gz	outcome	15466_30_COL9A1_CO9A1.txt.gz	Weighted median	5	0.0838779	0.622418	0.8928
15466_30_COL9A1_CO9A1.txt.gz	finngen_R9_CHIRBIL_PRIM.gz	outcome	15466_30_COL9A1_CO9A1.txt.gz	Inverse variance weighted	5	-0.0713934	0.527834	0.892408
15466_30_COL9A1_CO9A1.txt.gz	finngen_R9_CHIRBIL_PRIM.gz	outcome	15466_30_COL9A1_CO9A1.txt.gz	Simple mode	5	0.16811	0.83296	0.849904
15466_30_COL9A1_CO9A1.txt.gz	finngen_R9_CHIRBIL_PRIM.gz	outcome	15466_30_COL9A1_CO9A1.txt.gz	Weighted mode	5	0.177902	0.814758	0.837845
15468_14_CFHR1_FHR1.txt.gz	finngen_R9_CHIRBIL_PRIM.gz	outcome	15468_14_CFHR1_FHR1.txt.gz	MR Egger	61	0.177227	0.134326	0.192138
15468_14_CFHR1_FHR1.txt.gz	finngen_R9_CHIRBIL_PRIM.gz	outcome	15468_14_CFHR1_FHR1.txt.gz	Weighted median	61	0.0726328	0.104026	0.48504
15468_14_CFHR1_FHR1.txt.gz	finngen_R9_CHIRBIL_PRIM.gz	outcome	15468_14_CFHR1_FHR1.txt.gz	Inverse variance weighted	61	0.101309	0.0806045	0.208804
15468_14_CFHR1_FHR1.txt.gz	finngen_R9_CHIRBIL_PRIM.gz	outcome	15468_14_CFHR1_FHR1.txt.gz	Simple mode	61	0.260109	0.202868	0.20472
15468_14_CFHR1_FHR1.txt.gz	finngen_R9_CHIRBIL_PRIM.gz	outcome	15468_14_CFHR1_FHR1.txt.gz	Weighted mode	61	0.14023	0.102358	0.175795
15471_29_PNLIPRP2_LIPR2.txt.gz	finngen_R9_CHIRBIL_PRIM.gz	outcome	15471_29_PNLIPRP2_LIPR2.txt.gz	MR Egger	149	0.00172057	0.0754786	0.981844
15471_29_PNLIPRP2_LIPR2.txt.gz	finngen_R9_CHIRBIL_PRIM.gz	outcome	15471_29_PNLIPRP2_LIPR2.txt.gz	Weighted median	149	-0.0548579	0.0662629	0.407737
15471_29_PNLIPRP2_LIPR2.txt.gz	finngen_R9_CHIRBIL_PRIM.gz	outcome	15471_29_PNLIPRP2_LIPR2.txt.gz	Inverse variance weighted	149	-0.0295973	0.0445771	0.506717
15471_29_PNLIPRP2_LIPR2.txt.gz	finngen_R9_CHIRBIL_PRIM.gz	outcome	15471_29_PNLIPRP2_LIPR2.txt.gz	Simple mode	149	0.0139715	0.126105	0.911931
15471_29_PNLIPRP2_LIPR2.txt.gz	finngen_R9_CHIRBIL_PRIM.gz	outcome	15471_29_PNLIPRP2_LIPR2.txt.gz	Weighted mode	149	-1.54972e-05	0.0686029	0.99982
15475_4_PLTP_PLTP.txt.gz	finngen_R9_CHIRBIL_PRIM.gz	outcome	15475_4_PLTP_PLTP.txt.gz	MR Egger	78	-0.260128	0.152959	0.0931001
15475_4_PLTP_PLTP.txt.gz	finngen_R9_CHIRBIL_PRIM.gz	outcome	15475_4_PLTP_PLTP.txt.gz	Weighted median	78	-0.195644	0.135106	0.147595
15475_4_PLTP_PLTP.txt.gz	finngen_R9_CHIRBIL_PRIM.gz	outcome	15475_4_PLTP_PLTP.txt.gz	Inverse variance weighted	78	-0.12848	0.0847408	0.129482
15475_4_PLTP_PLTP.txt.gz	finngen_R9_CHIRBIL_PRIM.gz	outcome	15475_4_PLTP_PLTP.txt.gz	Simple mode	78	-0.194337	0.227454	0.395533
15475_4_PLTP_PLTP.txt.gz	finngen_R9_CHIRBIL_PRIM.gz	outcome	15475_4_PLTP_PLTP.txt.gz	Weighted mode	78	-0.194337	0.122461	0.116627
15476_6_REG3G_REG3G.txt.gz	finngen_R9_CHIRBIL_PRIM.gz	outcome	15476_6_REG3G_REG3G.txt.gz	MR Egger	86	-0.101848	0.0998912	0.31085
15476_6_REG3G_REG3G.txt.gz	finngen_R9_CHIRBIL_PRIM.gz	outcome	15476_6_REG3G_REG3G.txt.gz	Weighted median	86	0.0505622	0.0911291	0.579003
15476_6_REG3G_REG3G.txt.gz	finngen_R9_CHIRBIL_PRIM.gz	outcome	15476_6_REG3G_REG3G.txt.gz	Inverse variance weighted	86	0.000734087	0.0598306	0.990211
15476_6_REG3G_REG3G.txt.gz	finngen_R9_CHIRBIL_PRIM.gz	outcome	15476_6_REG3G_REG3G.txt.gz	Simple mode	86	-0.0566918	0.169465	0.7388
15476_6_REG3G_REG3G.txt.gz	finngen_R9_CHIRBIL_PRIM.gz	outcome	15476_6_REG3G_REG3G.txt.gz	Weighted mode	86	0.0204984	0.0793273	0.796721
15481_45_CAMP_LL_37.txt.gz	finngen_R9_CHIRBIL_PRIM.gz	outcome	15481_45_CAMP_LL_37.txt.gz	Wald ratio	1	-0.40786	0.671755	0.543748
15483_377_AGRN_Agrin.txt.gz	finngen_R9_CHIRBIL_PRIM.gz	outcome	15483_377_AGRN_Agrin.txt.gz	MR Egger	29	-0.266863	0.284914	0.357244
15483_377_AGRN_Agrin.txt.gz	finngen_R9_CHIRBIL_PRIM.gz	outcome	15483_377_AGRN_Agrin.txt.gz	Weighted median	29	0.486426	0.18667	0.00916571
15483_377_AGRN_Agrin.txt.gz	finngen_R9_CHIRBIL_PRIM.gz	outcome	15483_377_AGRN_Agrin.txt.gz	Inverse variance weighted	29	0.274719	0.131651	0.0369135
15483_377_AGRN_Agrin.txt.gz	finngen_R9_CHIRBIL_PRIM.gz	outcome	15483_377_AGRN_Agrin.txt.gz	Simple mode	29	0.217408	0.344705	0.533348
15483_377_AGRN_Agrin.txt.gz	finngen_R9_CHIRBIL_PRIM.gz	outcome	15483_377_AGRN_Agrin.txt.gz	Weighted mode	29	0.471236	0.204632	0.0289293
15486_126_AOC1_ABP1.txt.gz	finngen_R9_CHIRBIL_PRIM.gz	outcome	15486_126_AOC1_ABP1.txt.gz	MR Egger	191	-0.0625369	0.0599122	0.297907
15486_126_AOC1_ABP1.txt.gz	finngen_R9_CHIRBIL_PRIM.gz	outcome	15486_126_AOC1_ABP1.txt.gz	Weighted median	191	-0.0168274	0.064641	0.794616
15486_126_AOC1_ABP1.txt.gz	finngen_R9_CHIRBIL_PRIM.gz	outcome	15486_126_AOC1_ABP1.txt.gz	Inverse variance weighted	191	-0.0228845	0.038636	0.553643
15486_126_AOC1_ABP1.txt.gz	finngen_R9_CHIRBIL_PRIM.gz	outcome	15486_126_AOC1_ABP1.txt.gz	Simple mode	191	-0.127282	0.120693	0.292951
15486_126_AOC1_ABP1.txt.gz	finngen_R9_CHIRBIL_PRIM.gz	outcome	15486_126_AOC1_ABP1.txt.gz	Weighted mode	191	-0.058776	0.0575714	0.308589
15487_164_CES1_carboxylesterase__liver.txt.gz	finngen_R9_CHIRBIL_PRIM.gz	outcome	15487_164_CES1_carboxylesterase__liver.txt.gz	Wald ratio	1	0.360605	1.20244	0.764257
15491_20_CD248_CD248.txt.gz	finngen_R9_CHIRBIL_PRIM.gz	outcome	15491_20_CD248_CD248.txt.gz	Inverse variance weighted	2	0.801537	0.561811	0.153666
15494_11_FGFBP1_FGFP1.txt.gz	finngen_R9_CHIRBIL_PRIM.gz	outcome	15494_11_FGFBP1_FGFP1.txt.gz	MR Egger	4	-0.533426	1.53014	0.760658
15494_11_FGFBP1_FGFP1.txt.gz	finngen_R9_CHIRBIL_PRIM.gz	outcome	15494_11_FGFBP1_FGFP1.txt.gz	Weighted median	4	-0.3156	0.656615	0.630768
15494_11_FGFBP1_FGFP1.txt.gz	finngen_R9_CHIRBIL_PRIM.gz	outcome	15494_11_FGFBP1_FGFP1.txt.gz	Inverse variance weighted	4	-0.426932	0.573352	0.456499
15494_11_FGFBP1_FGFP1.txt.gz	finngen_R9_CHIRBIL_PRIM.gz	outcome	15494_11_FGFBP1_FGFP1.txt.gz	Simple mode	4	-0.288789	0.759106	0.728962
15494_11_FGFBP1_FGFP1.txt.gz	finngen_R9_CHIRBIL_PRIM.gz	outcome	15494_11_FGFBP1_FGFP1.txt.gz	Weighted mode	4	-0.310245	0.724206	0.69726
15495_9_FOLR3_FOLR3.txt.gz	finngen_R9_CHIRBIL_PRIM.gz	outcome	15495_9_FOLR3_FOLR3.txt.gz	MR Egger	77	0.0183087	0.061162	0.765503
15495_9_FOLR3_FOLR3.txt.gz	finngen_R9_CHIRBIL_PRIM.gz	outcome	15495_9_FOLR3_FOLR3.txt.gz	Weighted median	77	-0.00517688	0.0635466	0.935072
15495_9_FOLR3_FOLR3.txt.gz	finngen_R9_CHIRBIL_PRIM.gz	outcome	15495_9_FOLR3_FOLR3.txt.gz	Inverse variance weighted	77	0.0283394	0.0419331	0.499153
15495_9_FOLR3_FOLR3.txt.gz	finngen_R9_CHIRBIL_PRIM.gz	outcome	15495_9_FOLR3_FOLR3.txt.gz	Simple mode	77	-0.000962856	0.0960646	0.992029
15495_9_FOLR3_FOLR3.txt.gz	finngen_R9_CHIRBIL_PRIM.gz	outcome	15495_9_FOLR3_FOLR3.txt.gz	Weighted mode	77	-0.000962856	0.0525774	0.985437
15499_11_ATRN_Attractin.txt.gz	finngen_R9_CHIRBIL_PRIM.gz	outcome	15499_11_ATRN_Attractin.txt.gz	MR Egger	57	0.145655	0.0976362	0.141462
15499_11_ATRN_Attractin.txt.gz	finngen_R9_CHIRBIL_PRIM.gz	outcome	15499_11_ATRN_Attractin.txt.gz	Weighted median	57	0.192922	0.0992612	0.0519468
15499_11_ATRN_Attractin.txt.gz	finngen_R9_CHIRBIL_PRIM.gz	outcome	15499_11_ATRN_Attractin.txt.gz	Inverse variance weighted	57	0.196485	0.0695906	0.00475113
15499_11_ATRN_Attractin.txt.gz	finngen_R9_CHIRBIL_PRIM.gz	outcome	15499_11_ATRN_Attractin.txt.gz	Simple mode	57	0.201501	0.164319	0.225226
15499_11_ATRN_Attractin.txt.gz	finngen_R9_CHIRBIL_PRIM.gz	outcome	15499_11_ATRN_Attractin.txt.gz	Weighted mode	57	0.189177	0.0851034	0.030276
15503_15_LEFTY2_Lefty_A.txt.gz	finngen_R9_CHIRBIL_PRIM.gz	outcome	15503_15_LEFTY2_Lefty_A.txt.gz	MR Egger	16	0.762945	0.572982	0.204289
15503_15_LEFTY2_Lefty_A.txt.gz	finngen_R9_CHIRBIL_PRIM.gz	outcome	15503_15_LEFTY2_Lefty_A.txt.gz	Weighted median	16	0.825399	0.30165	0.00621376
15503_15_LEFTY2_Lefty_A.txt.gz	finngen_R9_CHIRBIL_PRIM.gz	outcome	15503_15_LEFTY2_Lefty_A.txt.gz	Inverse variance weighted	16	1.03573	0.222257	3.16085e-06
15503_15_LEFTY2_Lefty_A.txt.gz	finngen_R9_CHIRBIL_PRIM.gz	outcome	15503_15_LEFTY2_Lefty_A.txt.gz	Simple mode	16	0.693499	0.620772	0.281503
15503_15_LEFTY2_Lefty_A.txt.gz	finngen_R9_CHIRBIL_PRIM.gz	outcome	15503_15_LEFTY2_Lefty_A.txt.gz	Weighted mode	16	0.792543	0.340647	0.0344073
15503_20_LEFTY2_Lefty_A.txt.gz	finngen_R9_CHIRBIL_PRIM.gz	outcome	15503_20_LEFTY2_Lefty_A.txt.gz	MR Egger	115	0.267529	0.0749668	0.000527886
15503_20_LEFTY2_Lefty_A.txt.gz	finngen_R9_CHIRBIL_PRIM.gz	outcome	15503_20_LEFTY2_Lefty_A.txt.gz	Weighted median	115	0.333084	0.0735524	5.93971e-06
15503_20_LEFTY2_Lefty_A.txt.gz	finngen_R9_CHIRBIL_PRIM.gz	outcome	15503_20_LEFTY2_Lefty_A.txt.gz	Inverse variance weighted	115	0.279743	0.045272	6.44462e-10
15503_20_LEFTY2_Lefty_A.txt.gz	finngen_R9_CHIRBIL_PRIM.gz	outcome	15503_20_LEFTY2_Lefty_A.txt.gz	Simple mode	115	0.106201	0.139694	0.448683
15503_20_LEFTY2_Lefty_A.txt.gz	finngen_R9_CHIRBIL_PRIM.gz	outcome	15503_20_LEFTY2_Lefty_A.txt.gz	Weighted mode	115	0.28538	0.068326	5.81371e-05
15509_2_NAGLU_NAG.txt.gz	finngen_R9_CHIRBIL_PRIM.gz	outcome	15509_2_NAGLU_NAG.txt.gz	MR Egger	50	-0.294504	0.0954441	0.00336729
15509_2_NAGLU_NAG.txt.gz	finngen_R9_CHIRBIL_PRIM.gz	outcome	15509_2_NAGLU_NAG.txt.gz	Weighted median	50	-0.317923	0.104129	0.00226451
15509_2_NAGLU_NAG.txt.gz	finngen_R9_CHIRBIL_PRIM.gz	outcome	15509_2_NAGLU_NAG.txt.gz	Inverse variance weighted	50	-0.263396	0.070128	0.000172696
15509_2_NAGLU_NAG.txt.gz	finngen_R9_CHIRBIL_PRIM.gz	outcome	15509_2_NAGLU_NAG.txt.gz	Simple mode	50	-0.234093	0.222505	0.297923
15509_2_NAGLU_NAG.txt.gz	finngen_R9_CHIRBIL_PRIM.gz	outcome	15509_2_NAGLU_NAG.txt.gz	Weighted mode	50	-0.316061	0.0929423	0.00134571
15513_108_PRSS8_Prostasin.txt.gz	finngen_R9_CHIRBIL_PRIM.gz	outcome	15513_108_PRSS8_Prostasin.txt.gz	MR Egger	4	-0.986228	1.42693	0.560912
15513_108_PRSS8_Prostasin.txt.gz	finngen_R9_CHIRBIL_PRIM.gz	outcome	15513_108_PRSS8_Prostasin.txt.gz	Weighted median	4	-0.263482	0.627655	0.674641
15513_108_PRSS8_Prostasin.txt.gz	finngen_R9_CHIRBIL_PRIM.gz	outcome	15513_108_PRSS8_Prostasin.txt.gz	Inverse variance weighted	4	-0.185751	0.639274	0.771383
15513_108_PRSS8_Prostasin.txt.gz	finngen_R9_CHIRBIL_PRIM.gz	outcome	15513_108_PRSS8_Prostasin.txt.gz	Simple mode	4	-0.576912	1.06542	0.625798
15513_108_PRSS8_Prostasin.txt.gz	finngen_R9_CHIRBIL_PRIM.gz	outcome	15513_108_PRSS8_Prostasin.txt.gz	Weighted mode	4	-0.576912	0.744417	0.494827
15514_26_BCHE_Pseudocholinesterase.txt.gz	finngen_R9_CHIRBIL_PRIM.gz	outcome	15514_26_BCHE_Pseudocholinesterase.txt.gz	MR Egger	52	0.00788447	0.134535	0.9535
15514_26_BCHE_Pseudocholinesterase.txt.gz	finngen_R9_CHIRBIL_PRIM.gz	outcome	15514_26_BCHE_Pseudocholinesterase.txt.gz	Weighted median	52	-0.126512	0.110829	0.253657
15514_26_BCHE_Pseudocholinesterase.txt.gz	finngen_R9_CHIRBIL_PRIM.gz	outcome	15514_26_BCHE_Pseudocholinesterase.txt.gz	Inverse variance weighted	52	-0.148312	0.0784012	0.0585293
15514_26_BCHE_Pseudocholinesterase.txt.gz	finngen_R9_CHIRBIL_PRIM.gz	outcome	15514_26_BCHE_Pseudocholinesterase.txt.gz	Simple mode	52	-0.102472	0.18857	0.589209
15514_26_BCHE_Pseudocholinesterase.txt.gz	finngen_R9_CHIRBIL_PRIM.gz	outcome	15514_26_BCHE_Pseudocholinesterase.txt.gz	Weighted mode	52	-0.146018	0.105037	0.170519
15515_2_SAA1_SAA.txt.gz	finngen_R9_CHIRBIL_PRIM.gz	outcome	15515_2_SAA1_SAA.txt.gz	MR Egger	51	-0.109296	0.175621	0.536605
15515_2_SAA1_SAA.txt.gz	finngen_R9_CHIRBIL_PRIM.gz	outcome	15515_2_SAA1_SAA.txt.gz	Weighted median	51	-0.210655	0.156735	0.178942
15515_2_SAA1_SAA.txt.gz	finngen_R9_CHIRBIL_PRIM.gz	outcome	15515_2_SAA1_SAA.txt.gz	Inverse variance weighted	51	-0.115562	0.101303	0.253969
15515_2_SAA1_SAA.txt.gz	finngen_R9_CHIRBIL_PRIM.gz	outcome	15515_2_SAA1_SAA.txt.gz	Simple mode	51	-0.155842	0.258406	0.549176
15515_2_SAA1_SAA.txt.gz	finngen_R9_CHIRBIL_PRIM.gz	outcome	15515_2_SAA1_SAA.txt.gz	Weighted mode	51	-0.173013	0.162079	0.290892
15516_12_SAA4_SAA_4.txt.gz	finngen_R9_CHIRBIL_PRIM.gz	outcome	15516_12_SAA4_SAA_4.txt.gz	MR Egger	93	-0.0749357	0.0663823	0.261928
15516_12_SAA4_SAA_4.txt.gz	finngen_R9_CHIRBIL_PRIM.gz	outcome	15516_12_SAA4_SAA_4.txt.gz	Weighted median	93	-0.0681806	0.0650111	0.294292
15516_12_SAA4_SAA_4.txt.gz	finngen_R9_CHIRBIL_PRIM.gz	outcome	15516_12_SAA4_SAA_4.txt.gz	Inverse variance weighted	93	0.00319814	0.0437113	0.941675
15516_12_SAA4_SAA_4.txt.gz	finngen_R9_CHIRBIL_PRIM.gz	outcome	15516_12_SAA4_SAA_4.txt.gz	Simple mode	93	0.026704	0.11715	0.820192
15516_12_SAA4_SAA_4.txt.gz	finngen_R9_CHIRBIL_PRIM.gz	outcome	15516_12_SAA4_SAA_4.txt.gz	Weighted mode	93	-0.044627	0.0591363	0.452388
15521_4_CLSTN1_Alcadein_alpha_1.txt.gz	finngen_R9_CHIRBIL_PRIM.gz	outcome	15521_4_CLSTN1_Alcadein_alpha_1.txt.gz	MR Egger	20	-0.558481	0.214886	0.0181388
15521_4_CLSTN1_Alcadein_alpha_1.txt.gz	finngen_R9_CHIRBIL_PRIM.gz	outcome	15521_4_CLSTN1_Alcadein_alpha_1.txt.gz	Weighted median	20	-0.515285	0.199991	0.00997934
15521_4_CLSTN1_Alcadein_alpha_1.txt.gz	finngen_R9_CHIRBIL_PRIM.gz	outcome	15521_4_CLSTN1_Alcadein_alpha_1.txt.gz	Inverse variance weighted	20	-0.392282	0.146297	0.00733142
15521_4_CLSTN1_Alcadein_alpha_1.txt.gz	finngen_R9_CHIRBIL_PRIM.gz	outcome	15521_4_CLSTN1_Alcadein_alpha_1.txt.gz	Simple mode	20	-0.547283	0.293428	0.0776833
15521_4_CLSTN1_Alcadein_alpha_1.txt.gz	finngen_R9_CHIRBIL_PRIM.gz	outcome	15521_4_CLSTN1_Alcadein_alpha_1.txt.gz	Weighted mode	20	-0.585434	0.227011	0.0183951
15525_294_ADH1C_ADH1G.txt.gz	finngen_R9_CHIRBIL_PRIM.gz	outcome	15525_294_ADH1C_ADH1G.txt.gz	MR Egger	5	1.23096	1.03005	0.317929
15525_294_ADH1C_ADH1G.txt.gz	finngen_R9_CHIRBIL_PRIM.gz	outcome	15525_294_ADH1C_ADH1G.txt.gz	Weighted median	5	-0.302494	0.408438	0.458929
15525_294_ADH1C_ADH1G.txt.gz	finngen_R9_CHIRBIL_PRIM.gz	outcome	15525_294_ADH1C_ADH1G.txt.gz	Inverse variance weighted	5	-0.451677	0.425215	0.28813
15525_294_ADH1C_ADH1G.txt.gz	finngen_R9_CHIRBIL_PRIM.gz	outcome	15525_294_ADH1C_ADH1G.txt.gz	Simple mode	5	-0.168652	0.628557	0.801725
15525_294_ADH1C_ADH1G.txt.gz	finngen_R9_CHIRBIL_PRIM.gz	outcome	15525_294_ADH1C_ADH1G.txt.gz	Weighted mode	5	-0.276017	0.430554	0.556361
15526_33_GSS_GSHB.txt.gz	finngen_R9_CHIRBIL_PRIM.gz	outcome	15526_33_GSS_GSHB.txt.gz	MR Egger	11	-1.2736	0.817017	0.153463
15526_33_GSS_GSHB.txt.gz	finngen_R9_CHIRBIL_PRIM.gz	outcome	15526_33_GSS_GSHB.txt.gz	Weighted median	11	-0.183981	0.362077	0.611365
15526_33_GSS_GSHB.txt.gz	finngen_R9_CHIRBIL_PRIM.gz	outcome	15526_33_GSS_GSHB.txt.gz	Inverse variance weighted	11	-0.206365	0.276487	0.455436
15526_33_GSS_GSHB.txt.gz	finngen_R9_CHIRBIL_PRIM.gz	outcome	15526_33_GSS_GSHB.txt.gz	Simple mode	11	-0.116962	0.648257	0.860423
15526_33_GSS_GSHB.txt.gz	finngen_R9_CHIRBIL_PRIM.gz	outcome	15526_33_GSS_GSHB.txt.gz	Weighted mode	11	-0.335239	0.547013	0.553654
15530_33_EPHB4_EphB4.txt.gz	finngen_R9_CHIRBIL_PRIM.gz	outcome	15530_33_EPHB4_EphB4.txt.gz	MR Egger	7	0.595843	1.97749	0.775305
15530_33_EPHB4_EphB4.txt.gz	finngen_R9_CHIRBIL_PRIM.gz	outcome	15530_33_EPHB4_EphB4.txt.gz	Weighted median	7	0.756308	0.463283	0.102575
15530_33_EPHB4_EphB4.txt.gz	finngen_R9_CHIRBIL_PRIM.gz	outcome	15530_33_EPHB4_EphB4.txt.gz	Inverse variance weighted	7	0.406463	0.54001	0.451633
15530_33_EPHB4_EphB4.txt.gz	finngen_R9_CHIRBIL_PRIM.gz	outcome	15530_33_EPHB4_EphB4.txt.gz	Simple mode	7	1.51084	0.679108	0.0677543
15530_33_EPHB4_EphB4.txt.gz	finngen_R9_CHIRBIL_PRIM.gz	outcome	15530_33_EPHB4_EphB4.txt.gz	Weighted mode	7	0.579705	0.560578	0.340949
15533_97_MSR1_Macrophage_scavenger_receptor.txt.gz	finngen_R9_CHIRBIL_PRIM.gz	outcome	15533_97_MSR1_Macrophage_scavenger_receptor.txt.gz	MR Egger	27	0.523504	0.291138	0.0842446
15533_97_MSR1_Macrophage_scavenger_receptor.txt.gz	finngen_R9_CHIRBIL_PRIM.gz	outcome	15533_97_MSR1_Macrophage_scavenger_receptor.txt.gz	Weighted median	27	-0.273613	0.232053	0.238361
15533_97_MSR1_Macrophage_scavenger_receptor.txt.gz	finngen_R9_CHIRBIL_PRIM.gz	outcome	15533_97_MSR1_Macrophage_scavenger_receptor.txt.gz	Inverse variance weighted	27	-0.0648948	0.158085	0.681436
15533_97_MSR1_Macrophage_scavenger_receptor.txt.gz	finngen_R9_CHIRBIL_PRIM.gz	outcome	15533_97_MSR1_Macrophage_scavenger_receptor.txt.gz	Simple mode	27	-0.675762	0.426435	0.125128
15533_97_MSR1_Macrophage_scavenger_receptor.txt.gz	finngen_R9_CHIRBIL_PRIM.gz	outcome	15533_97_MSR1_Macrophage_scavenger_receptor.txt.gz	Weighted mode	27	-0.283026	0.31663	0.379591
15535_3_PRSS27_Marapsin.txt.gz	finngen_R9_CHIRBIL_PRIM.gz	outcome	15535_3_PRSS27_Marapsin.txt.gz	MR Egger	9	0.0551726	0.526296	0.91945
15535_3_PRSS27_Marapsin.txt.gz	finngen_R9_CHIRBIL_PRIM.gz	outcome	15535_3_PRSS27_Marapsin.txt.gz	Weighted median	9	0.504099	0.301168	0.0941674
15535_3_PRSS27_Marapsin.txt.gz	finngen_R9_CHIRBIL_PRIM.gz	outcome	15535_3_PRSS27_Marapsin.txt.gz	Inverse variance weighted	9	0.437018	0.316368	0.167168
15535_3_PRSS27_Marapsin.txt.gz	finngen_R9_CHIRBIL_PRIM.gz	outcome	15535_3_PRSS27_Marapsin.txt.gz	Simple mode	9	-0.450156	0.68217	0.527863
15535_3_PRSS27_Marapsin.txt.gz	finngen_R9_CHIRBIL_PRIM.gz	outcome	15535_3_PRSS27_Marapsin.txt.gz	Weighted mode	9	0.489738	0.305586	0.147686
15540_6_VIM_Vimentin.txt.gz	finngen_R9_CHIRBIL_PRIM.gz	outcome	15540_6_VIM_Vimentin.txt.gz	MR Egger	5	-0.123488	1.52403	0.940523
15540_6_VIM_Vimentin.txt.gz	finngen_R9_CHIRBIL_PRIM.gz	outcome	15540_6_VIM_Vimentin.txt.gz	Weighted median	5	0.0591177	0.582945	0.919223
15540_6_VIM_Vimentin.txt.gz	finngen_R9_CHIRBIL_PRIM.gz	outcome	15540_6_VIM_Vimentin.txt.gz	Inverse variance weighted	5	0.00821684	0.476429	0.98624
15540_6_VIM_Vimentin.txt.gz	finngen_R9_CHIRBIL_PRIM.gz	outcome	15540_6_VIM_Vimentin.txt.gz	Simple mode	5	0.17742	0.857571	0.846203
15540_6_VIM_Vimentin.txt.gz	finngen_R9_CHIRBIL_PRIM.gz	outcome	15540_6_VIM_Vimentin.txt.gz	Weighted mode	5	0.239679	0.889875	0.800991
15544_25_KLK14_kallikrein_14.txt.gz	finngen_R9_CHIRBIL_PRIM.gz	outcome	15544_25_KLK14_kallikrein_14.txt.gz	MR Egger	43	0.0470762	0.239126	0.844903
15544_25_KLK14_kallikrein_14.txt.gz	finngen_R9_CHIRBIL_PRIM.gz	outcome	15544_25_KLK14_kallikrein_14.txt.gz	Weighted median	43	0.19486	0.156619	0.213438
15544_25_KLK14_kallikrein_14.txt.gz	finngen_R9_CHIRBIL_PRIM.gz	outcome	15544_25_KLK14_kallikrein_14.txt.gz	Inverse variance weighted	43	0.146623	0.114446	0.200141
15544_25_KLK14_kallikrein_14.txt.gz	finngen_R9_CHIRBIL_PRIM.gz	outcome	15544_25_KLK14_kallikrein_14.txt.gz	Simple mode	43	0.429921	0.279417	0.131394
15544_25_KLK14_kallikrein_14.txt.gz	finngen_R9_CHIRBIL_PRIM.gz	outcome	15544_25_KLK14_kallikrein_14.txt.gz	Weighted mode	43	0.218736	0.215253	0.315362
15556_49_AMY2B_Alpha_amylase_2B.txt.gz	finngen_R9_CHIRBIL_PRIM.gz	outcome	15556_49_AMY2B_Alpha_amylase_2B.txt.gz	MR Egger	52	0.341937	0.157616	0.0348293
15556_49_AMY2B_Alpha_amylase_2B.txt.gz	finngen_R9_CHIRBIL_PRIM.gz	outcome	15556_49_AMY2B_Alpha_amylase_2B.txt.gz	Weighted median	52	0.158504	0.124514	0.203024
15556_49_AMY2B_Alpha_amylase_2B.txt.gz	finngen_R9_CHIRBIL_PRIM.gz	outcome	15556_49_AMY2B_Alpha_amylase_2B.txt.gz	Inverse variance weighted	52	0.299863	0.0824315	0.000275055
15556_49_AMY2B_Alpha_amylase_2B.txt.gz	finngen_R9_CHIRBIL_PRIM.gz	outcome	15556_49_AMY2B_Alpha_amylase_2B.txt.gz	Simple mode	52	0.00553522	0.185603	0.976325
15556_49_AMY2B_Alpha_amylase_2B.txt.gz	finngen_R9_CHIRBIL_PRIM.gz	outcome	15556_49_AMY2B_Alpha_amylase_2B.txt.gz	Weighted mode	52	0.122948	0.139321	0.381656
15558_63_ENPEP_AMPE.txt.gz	finngen_R9_CHIRBIL_PRIM.gz	outcome	15558_63_ENPEP_AMPE.txt.gz	MR Egger	88	-0.0770158	0.114867	0.504349
15558_63_ENPEP_AMPE.txt.gz	finngen_R9_CHIRBIL_PRIM.gz	outcome	15558_63_ENPEP_AMPE.txt.gz	Weighted median	88	-0.117257	0.101144	0.24633
15558_63_ENPEP_AMPE.txt.gz	finngen_R9_CHIRBIL_PRIM.gz	outcome	15558_63_ENPEP_AMPE.txt.gz	Inverse variance weighted	88	-0.064236	0.06828	0.346821
15558_63_ENPEP_AMPE.txt.gz	finngen_R9_CHIRBIL_PRIM.gz	outcome	15558_63_ENPEP_AMPE.txt.gz	Simple mode	88	0.040335	0.18382	0.826832
15558_63_ENPEP_AMPE.txt.gz	finngen_R9_CHIRBIL_PRIM.gz	outcome	15558_63_ENPEP_AMPE.txt.gz	Weighted mode	88	-0.102156	0.131335	0.438782
15559_5_ANTXR2_ANTR2.txt.gz	finngen_R9_CHIRBIL_PRIM.gz	outcome	15559_5_ANTXR2_ANTR2.txt.gz	MR Egger	16	0.440225	0.412764	0.304232
15559_5_ANTXR2_ANTR2.txt.gz	finngen_R9_CHIRBIL_PRIM.gz	outcome	15559_5_ANTXR2_ANTR2.txt.gz	Weighted median	16	0.2612	0.232731	0.261724
15559_5_ANTXR2_ANTR2.txt.gz	finngen_R9_CHIRBIL_PRIM.gz	outcome	15559_5_ANTXR2_ANTR2.txt.gz	Inverse variance weighted	16	0.24695	0.191573	0.197375
15559_5_ANTXR2_ANTR2.txt.gz	finngen_R9_CHIRBIL_PRIM.gz	outcome	15559_5_ANTXR2_ANTR2.txt.gz	Simple mode	16	0.318594	0.357509	0.38692
15559_5_ANTXR2_ANTR2.txt.gz	finngen_R9_CHIRBIL_PRIM.gz	outcome	15559_5_ANTXR2_ANTR2.txt.gz	Weighted mode	16	0.213836	0.225113	0.357216
15560_52_TCN2_Apo_TC_II.txt.gz	finngen_R9_CHIRBIL_PRIM.gz	outcome	15560_52_TCN2_Apo_TC_II.txt.gz	MR Egger	108	0.0502626	0.0648528	0.44005
15560_52_TCN2_Apo_TC_II.txt.gz	finngen_R9_CHIRBIL_PRIM.gz	outcome	15560_52_TCN2_Apo_TC_II.txt.gz	Weighted median	108	0.0912853	0.046977	0.051993
15560_52_TCN2_Apo_TC_II.txt.gz	finngen_R9_CHIRBIL_PRIM.gz	outcome	15560_52_TCN2_Apo_TC_II.txt.gz	Inverse variance weighted	108	0.0531398	0.0319612	0.096386
15560_52_TCN2_Apo_TC_II.txt.gz	finngen_R9_CHIRBIL_PRIM.gz	outcome	15560_52_TCN2_Apo_TC_II.txt.gz	Simple mode	108	0.142401	0.0781744	0.0713123
15560_52_TCN2_Apo_TC_II.txt.gz	finngen_R9_CHIRBIL_PRIM.gz	outcome	15560_52_TCN2_Apo_TC_II.txt.gz	Weighted mode	108	0.086359	0.0485721	0.078252
15562_24_GUSB_BGLR.txt.gz	finngen_R9_CHIRBIL_PRIM.gz	outcome	15562_24_GUSB_BGLR.txt.gz	MR Egger	9	-0.827365	0.901786	0.389411
15562_24_GUSB_BGLR.txt.gz	finngen_R9_CHIRBIL_PRIM.gz	outcome	15562_24_GUSB_BGLR.txt.gz	Weighted median	9	0.529731	0.316307	0.0939862
15562_24_GUSB_BGLR.txt.gz	finngen_R9_CHIRBIL_PRIM.gz	outcome	15562_24_GUSB_BGLR.txt.gz	Inverse variance weighted	9	0.544616	0.254121	0.0321018
15562_24_GUSB_BGLR.txt.gz	finngen_R9_CHIRBIL_PRIM.gz	outcome	15562_24_GUSB_BGLR.txt.gz	Simple mode	9	0.540208	0.46461	0.278453
15562_24_GUSB_BGLR.txt.gz	finngen_R9_CHIRBIL_PRIM.gz	outcome	15562_24_GUSB_BGLR.txt.gz	Weighted mode	9	0.575776	0.341309	0.130092
15565_102_MUC16_CA125.txt.gz	finngen_R9_CHIRBIL_PRIM.gz	outcome	15565_102_MUC16_CA125.txt.gz	MR Egger	5	0.0493665	1.37341	0.973585
15565_102_MUC16_CA125.txt.gz	finngen_R9_CHIRBIL_PRIM.gz	outcome	15565_102_MUC16_CA125.txt.gz	Weighted median	5	-0.703228	0.457442	0.124219
15565_102_MUC16_CA125.txt.gz	finngen_R9_CHIRBIL_PRIM.gz	outcome	15565_102_MUC16_CA125.txt.gz	Inverse variance weighted	5	-0.655983	0.433456	0.130183
15565_102_MUC16_CA125.txt.gz	finngen_R9_CHIRBIL_PRIM.gz	outcome	15565_102_MUC16_CA125.txt.gz	Simple mode	5	-0.898286	0.744121	0.293866
15565_102_MUC16_CA125.txt.gz	finngen_R9_CHIRBIL_PRIM.gz	outcome	15565_102_MUC16_CA125.txt.gz	Weighted mode	5	-0.67318	0.511585	0.258564
15570_99_CR2_Complement_receptor_type_2.txt.gz	finngen_R9_CHIRBIL_PRIM.gz	outcome	15570_99_CR2_Complement_receptor_type_2.txt.gz	MR Egger	34	0.257917	0.452894	0.573002
15570_99_CR2_Complement_receptor_type_2.txt.gz	finngen_R9_CHIRBIL_PRIM.gz	outcome	15570_99_CR2_Complement_receptor_type_2.txt.gz	Weighted median	34	0.399764	0.245698	0.103725
15570_99_CR2_Complement_receptor_type_2.txt.gz	finngen_R9_CHIRBIL_PRIM.gz	outcome	15570_99_CR2_Complement_receptor_type_2.txt.gz	Inverse variance weighted	34	0.213117	0.191215	0.265046
15570_99_CR2_Complement_receptor_type_2.txt.gz	finngen_R9_CHIRBIL_PRIM.gz	outcome	15570_99_CR2_Complement_receptor_type_2.txt.gz	Simple mode	34	0.196036	0.469781	0.679167
15570_99_CR2_Complement_receptor_type_2.txt.gz	finngen_R9_CHIRBIL_PRIM.gz	outcome	15570_99_CR2_Complement_receptor_type_2.txt.gz	Weighted mode	34	0.393981	0.328319	0.238686
15573_110_NCAN_CSPG3.txt.gz	finngen_R9_CHIRBIL_PRIM.gz	outcome	15573_110_NCAN_CSPG3.txt.gz	MR Egger	9	-0.480801	0.415456	0.285116
15573_110_NCAN_CSPG3.txt.gz	finngen_R9_CHIRBIL_PRIM.gz	outcome	15573_110_NCAN_CSPG3.txt.gz	Weighted median	9	-0.387365	0.330158	0.240687
15573_110_NCAN_CSPG3.txt.gz	finngen_R9_CHIRBIL_PRIM.gz	outcome	15573_110_NCAN_CSPG3.txt.gz	Inverse variance weighted	9	0.114995	0.266173	0.66572
15573_110_NCAN_CSPG3.txt.gz	finngen_R9_CHIRBIL_PRIM.gz	outcome	15573_110_NCAN_CSPG3.txt.gz	Simple mode	9	0.935383	0.741349	0.242589
15573_110_NCAN_CSPG3.txt.gz	finngen_R9_CHIRBIL_PRIM.gz	outcome	15573_110_NCAN_CSPG3.txt.gz	Weighted mode	9	-0.445369	0.343517	0.230949
15576_158_RNASE3_ECP.txt.gz	finngen_R9_CHIRBIL_PRIM.gz	outcome	15576_158_RNASE3_ECP.txt.gz	MR Egger	41	-0.218051	0.181539	0.236946
15576_158_RNASE3_ECP.txt.gz	finngen_R9_CHIRBIL_PRIM.gz	outcome	15576_158_RNASE3_ECP.txt.gz	Weighted median	41	-0.487586	0.170541	0.00424898
15576_158_RNASE3_ECP.txt.gz	finngen_R9_CHIRBIL_PRIM.gz	outcome	15576_158_RNASE3_ECP.txt.gz	Inverse variance weighted	41	-0.376639	0.110559	0.000657571
15576_158_RNASE3_ECP.txt.gz	finngen_R9_CHIRBIL_PRIM.gz	outcome	15576_158_RNASE3_ECP.txt.gz	Simple mode	41	-0.23325	0.278548	0.407356
15576_158_RNASE3_ECP.txt.gz	finngen_R9_CHIRBIL_PRIM.gz	outcome	15576_158_RNASE3_ECP.txt.gz	Weighted mode	41	-0.357479	0.175703	0.0485612
15579_26_ENPP6_ENPP6.txt.gz	finngen_R9_CHIRBIL_PRIM.gz	outcome	15579_26_ENPP6_ENPP6.txt.gz	Inverse variance weighted	2	-0.909472	0.790312	0.249824
15582_25_FCN1_FCN1.txt.gz	finngen_R9_CHIRBIL_PRIM.gz	outcome	15582_25_FCN1_FCN1.txt.gz	MR Egger	60	-0.130569	0.171596	0.449793
15582_25_FCN1_FCN1.txt.gz	finngen_R9_CHIRBIL_PRIM.gz	outcome	15582_25_FCN1_FCN1.txt.gz	Weighted median	60	-0.277222	0.152988	0.0699791
15582_25_FCN1_FCN1.txt.gz	finngen_R9_CHIRBIL_PRIM.gz	outcome	15582_25_FCN1_FCN1.txt.gz	Inverse variance weighted	60	-0.198095	0.09585	0.0387608
15582_25_FCN1_FCN1.txt.gz	finngen_R9_CHIRBIL_PRIM.gz	outcome	15582_25_FCN1_FCN1.txt.gz	Simple mode	60	-0.24013	0.277661	0.390634
15582_25_FCN1_FCN1.txt.gz	finngen_R9_CHIRBIL_PRIM.gz	outcome	15582_25_FCN1_FCN1.txt.gz	Weighted mode	60	-0.226454	0.140644	0.112711
15584_9_CFHR2_FHR2.txt.gz	finngen_R9_CHIRBIL_PRIM.gz	outcome	15584_9_CFHR2_FHR2.txt.gz	MR Egger	87	-0.0400899	0.0814288	0.623754
15584_9_CFHR2_FHR2.txt.gz	finngen_R9_CHIRBIL_PRIM.gz	outcome	15584_9_CFHR2_FHR2.txt.gz	Weighted median	87	-0.0210969	0.0609155	0.729095
15584_9_CFHR2_FHR2.txt.gz	finngen_R9_CHIRBIL_PRIM.gz	outcome	15584_9_CFHR2_FHR2.txt.gz	Inverse variance weighted	87	0.0108363	0.0489201	0.824696
15584_9_CFHR2_FHR2.txt.gz	finngen_R9_CHIRBIL_PRIM.gz	outcome	15584_9_CFHR2_FHR2.txt.gz	Simple mode	87	0.0704181	0.101502	0.4897
15584_9_CFHR2_FHR2.txt.gz	finngen_R9_CHIRBIL_PRIM.gz	outcome	15584_9_CFHR2_FHR2.txt.gz	Weighted mode	87	0.0109187	0.0592386	0.854198
15585_304_FBLN5_fibulin_5.txt.gz	finngen_R9_CHIRBIL_PRIM.gz	outcome	15585_304_FBLN5_fibulin_5.txt.gz	MR Egger	4	1.81313	2.03581	0.467107
15585_304_FBLN5_fibulin_5.txt.gz	finngen_R9_CHIRBIL_PRIM.gz	outcome	15585_304_FBLN5_fibulin_5.txt.gz	Weighted median	4	0.912042	0.646831	0.158535
15585_304_FBLN5_fibulin_5.txt.gz	finngen_R9_CHIRBIL_PRIM.gz	outcome	15585_304_FBLN5_fibulin_5.txt.gz	Inverse variance weighted	4	0.970499	0.556035	0.0809169
15585_304_FBLN5_fibulin_5.txt.gz	finngen_R9_CHIRBIL_PRIM.gz	outcome	15585_304_FBLN5_fibulin_5.txt.gz	Simple mode	4	0.771325	0.924958	0.465522
15585_304_FBLN5_fibulin_5.txt.gz	finngen_R9_CHIRBIL_PRIM.gz	outcome	15585_304_FBLN5_fibulin_5.txt.gz	Weighted mode	4	1.20436	0.762848	0.212504
15587_20_FOLR2_FOLR2.txt.gz	finngen_R9_CHIRBIL_PRIM.gz	outcome	15587_20_FOLR2_FOLR2.txt.gz	MR Egger	4	-0.293335	0.868374	0.767676
15587_20_FOLR2_FOLR2.txt.gz	finngen_R9_CHIRBIL_PRIM.gz	outcome	15587_20_FOLR2_FOLR2.txt.gz	Weighted median	4	-0.381597	0.567008	0.500947
15587_20_FOLR2_FOLR2.txt.gz	finngen_R9_CHIRBIL_PRIM.gz	outcome	15587_20_FOLR2_FOLR2.txt.gz	Inverse variance weighted	4	-0.298985	0.49583	0.546509
15587_20_FOLR2_FOLR2.txt.gz	finngen_R9_CHIRBIL_PRIM.gz	outcome	15587_20_FOLR2_FOLR2.txt.gz	Simple mode	4	-0.353847	0.671404	0.634662
15587_20_FOLR2_FOLR2.txt.gz	finngen_R9_CHIRBIL_PRIM.gz	outcome	15587_20_FOLR2_FOLR2.txt.gz	Weighted mode	4	-0.384001	0.583694	0.55759
15589_1_GC_Gc_Globulin__Mixed_Type.txt.gz	finngen_R9_CHIRBIL_PRIM.gz	outcome	15589_1_GC_Gc_Globulin__Mixed_Type.txt.gz	MR Egger	8	-0.0533501	1.35824	0.969942
15589_1_GC_Gc_Globulin__Mixed_Type.txt.gz	finngen_R9_CHIRBIL_PRIM.gz	outcome	15589_1_GC_Gc_Globulin__Mixed_Type.txt.gz	Weighted median	8	0.637779	0.437905	0.145273
15589_1_GC_Gc_Globulin__Mixed_Type.txt.gz	finngen_R9_CHIRBIL_PRIM.gz	outcome	15589_1_GC_Gc_Globulin__Mixed_Type.txt.gz	Inverse variance weighted	8	0.766712	0.352594	0.0296685
15589_1_GC_Gc_Globulin__Mixed_Type.txt.gz	finngen_R9_CHIRBIL_PRIM.gz	outcome	15589_1_GC_Gc_Globulin__Mixed_Type.txt.gz	Simple mode	8	1.06677	0.645707	0.142497
15589_1_GC_Gc_Globulin__Mixed_Type.txt.gz	finngen_R9_CHIRBIL_PRIM.gz	outcome	15589_1_GC_Gc_Globulin__Mixed_Type.txt.gz	Weighted mode	8	0.565113	0.4672	0.265703
15594_47_HTRA1_HTRA1.txt.gz	finngen_R9_CHIRBIL_PRIM.gz	outcome	15594_47_HTRA1_HTRA1.txt.gz	MR Egger	8	0.685453	1.04306	0.535458
15594_47_HTRA1_HTRA1.txt.gz	finngen_R9_CHIRBIL_PRIM.gz	outcome	15594_47_HTRA1_HTRA1.txt.gz	Weighted median	8	-0.201402	0.419245	0.630949
15594_47_HTRA1_HTRA1.txt.gz	finngen_R9_CHIRBIL_PRIM.gz	outcome	15594_47_HTRA1_HTRA1.txt.gz	Inverse variance weighted	8	-0.339631	0.317529	0.284797
15594_47_HTRA1_HTRA1.txt.gz	finngen_R9_CHIRBIL_PRIM.gz	outcome	15594_47_HTRA1_HTRA1.txt.gz	Simple mode	8	-0.138028	0.590051	0.821737
15594_47_HTRA1_HTRA1.txt.gz	finngen_R9_CHIRBIL_PRIM.gz	outcome	15594_47_HTRA1_HTRA1.txt.gz	Weighted mode	8	-0.112034	0.53355	0.839665
15602_43_IL6R_IL_6_sRa.txt.gz	finngen_R9_CHIRBIL_PRIM.gz	outcome	15602_43_IL6R_IL_6_sRa.txt.gz	MR Egger	118	-0.0987123	0.0671145	0.144052
15602_43_IL6R_IL_6_sRa.txt.gz	finngen_R9_CHIRBIL_PRIM.gz	outcome	15602_43_IL6R_IL_6_sRa.txt.gz	Weighted median	118	-0.154725	0.0674767	0.0218471
15602_43_IL6R_IL_6_sRa.txt.gz	finngen_R9_CHIRBIL_PRIM.gz	outcome	15602_43_IL6R_IL_6_sRa.txt.gz	Inverse variance weighted	118	-0.0454	0.0405066	0.262372
15602_43_IL6R_IL_6_sRa.txt.gz	finngen_R9_CHIRBIL_PRIM.gz	outcome	15602_43_IL6R_IL_6_sRa.txt.gz	Simple mode	118	-0.0816738	0.130067	0.531271
15602_43_IL6R_IL_6_sRa.txt.gz	finngen_R9_CHIRBIL_PRIM.gz	outcome	15602_43_IL6R_IL_6_sRa.txt.gz	Weighted mode	118	-0.154203	0.0672652	0.0236664
15603_20_ITGA2_Integrin_alpha_2.txt.gz	finngen_R9_CHIRBIL_PRIM.gz	outcome	15603_20_ITGA2_Integrin_alpha_2.txt.gz	Inverse variance weighted	2	0.488926	0.616016	0.427375
15604_18_MAPK9_JNK2.txt.gz	finngen_R9_CHIRBIL_PRIM.gz	outcome	15604_18_MAPK9_JNK2.txt.gz	MR Egger	10	-0.674385	0.588741	0.285123
15604_18_MAPK9_JNK2.txt.gz	finngen_R9_CHIRBIL_PRIM.gz	outcome	15604_18_MAPK9_JNK2.txt.gz	Weighted median	10	-0.160171	0.332752	0.630266
15604_18_MAPK9_JNK2.txt.gz	finngen_R9_CHIRBIL_PRIM.gz	outcome	15604_18_MAPK9_JNK2.txt.gz	Inverse variance weighted	10	-0.169633	0.26786	0.526545
15604_18_MAPK9_JNK2.txt.gz	finngen_R9_CHIRBIL_PRIM.gz	outcome	15604_18_MAPK9_JNK2.txt.gz	Simple mode	10	0.388902	0.578393	0.518228
15604_18_MAPK9_JNK2.txt.gz	finngen_R9_CHIRBIL_PRIM.gz	outcome	15604_18_MAPK9_JNK2.txt.gz	Weighted mode	10	-0.430166	0.389262	0.29779
15607_56_PKLR_KPYR.txt.gz	finngen_R9_CHIRBIL_PRIM.gz	outcome	15607_56_PKLR_KPYR.txt.gz	MR Egger	6	-0.916289	0.614396	0.210133
15607_56_PKLR_KPYR.txt.gz	finngen_R9_CHIRBIL_PRIM.gz	outcome	15607_56_PKLR_KPYR.txt.gz	Weighted median	6	-0.653229	0.41353	0.114189
15607_56_PKLR_KPYR.txt.gz	finngen_R9_CHIRBIL_PRIM.gz	outcome	15607_56_PKLR_KPYR.txt.gz	Inverse variance weighted	6	-0.609358	0.361286	0.0916732
15607_56_PKLR_KPYR.txt.gz	finngen_R9_CHIRBIL_PRIM.gz	outcome	15607_56_PKLR_KPYR.txt.gz	Simple mode	6	-0.727063	0.690598	0.340627
15607_56_PKLR_KPYR.txt.gz	finngen_R9_CHIRBIL_PRIM.gz	outcome	15607_56_PKLR_KPYR.txt.gz	Weighted mode	6	-0.667325	0.462054	0.208274
15610_72_LAP3_LAP.txt.gz	finngen_R9_CHIRBIL_PRIM.gz	outcome	15610_72_LAP3_LAP.txt.gz	MR Egger	8	-0.668336	0.672573	0.358738
15610_72_LAP3_LAP.txt.gz	finngen_R9_CHIRBIL_PRIM.gz	outcome	15610_72_LAP3_LAP.txt.gz	Weighted median	8	-0.412499	0.448103	0.357288
15610_72_LAP3_LAP.txt.gz	finngen_R9_CHIRBIL_PRIM.gz	outcome	15610_72_LAP3_LAP.txt.gz	Inverse variance weighted	8	0.0470627	0.449641	0.91664
15610_72_LAP3_LAP.txt.gz	finngen_R9_CHIRBIL_PRIM.gz	outcome	15610_72_LAP3_LAP.txt.gz	Simple mode	8	-0.108846	0.74196	0.887504
15610_72_LAP3_LAP.txt.gz	finngen_R9_CHIRBIL_PRIM.gz	outcome	15610_72_LAP3_LAP.txt.gz	Weighted mode	8	-0.43217	0.49659	0.412996
15613_16_PNLIP_LIPP.txt.gz	finngen_R9_CHIRBIL_PRIM.gz	outcome	15613_16_PNLIP_LIPP.txt.gz	MR Egger	5	-0.919997	2.52503	0.739763
15613_16_PNLIP_LIPP.txt.gz	finngen_R9_CHIRBIL_PRIM.gz	outcome	15613_16_PNLIP_LIPP.txt.gz	Weighted median	5	0.0769847	0.503043	0.878368
15613_16_PNLIP_LIPP.txt.gz	finngen_R9_CHIRBIL_PRIM.gz	outcome	15613_16_PNLIP_LIPP.txt.gz	Inverse variance weighted	5	0.205099	0.457066	0.653626
15613_16_PNLIP_LIPP.txt.gz	finngen_R9_CHIRBIL_PRIM.gz	outcome	15613_16_PNLIP_LIPP.txt.gz	Simple mode	5	0.337578	0.862073	0.715328
15613_16_PNLIP_LIPP.txt.gz	finngen_R9_CHIRBIL_PRIM.gz	outcome	15613_16_PNLIP_LIPP.txt.gz	Weighted mode	5	0.0174263	0.523477	0.975039
15614_168_LILRA2_LIRA2.txt.gz	finngen_R9_CHIRBIL_PRIM.gz	outcome	15614_168_LILRA2_LIRA2.txt.gz	MR Egger	70	0.0222706	0.119185	0.852329
15614_168_LILRA2_LIRA2.txt.gz	finngen_R9_CHIRBIL_PRIM.gz	outcome	15614_168_LILRA2_LIRA2.txt.gz	Weighted median	70	-0.12892	0.12399	0.298453
15614_168_LILRA2_LIRA2.txt.gz	finngen_R9_CHIRBIL_PRIM.gz	outcome	15614_168_LILRA2_LIRA2.txt.gz	Inverse variance weighted	70	-0.0586245	0.0767973	0.445245
15614_168_LILRA2_LIRA2.txt.gz	finngen_R9_CHIRBIL_PRIM.gz	outcome	15614_168_LILRA2_LIRA2.txt.gz	Simple mode	70	-0.236766	0.212972	0.270115
15614_168_LILRA2_LIRA2.txt.gz	finngen_R9_CHIRBIL_PRIM.gz	outcome	15614_168_LILRA2_LIRA2.txt.gz	Weighted mode	70	-0.0685366	0.114615	0.551815
15620_4_NLGN1_NLGN1.txt.gz	finngen_R9_CHIRBIL_PRIM.gz	outcome	15620_4_NLGN1_NLGN1.txt.gz	MR Egger	8	0.578304	0.920697	0.553069
15620_4_NLGN1_NLGN1.txt.gz	finngen_R9_CHIRBIL_PRIM.gz	outcome	15620_4_NLGN1_NLGN1.txt.gz	Weighted median	8	0.281726	0.387122	0.46677
15620_4_NLGN1_NLGN1.txt.gz	finngen_R9_CHIRBIL_PRIM.gz	outcome	15620_4_NLGN1_NLGN1.txt.gz	Inverse variance weighted	8	0.154373	0.321957	0.631595
15620_4_NLGN1_NLGN1.txt.gz	finngen_R9_CHIRBIL_PRIM.gz	outcome	15620_4_NLGN1_NLGN1.txt.gz	Simple mode	8	0.26539	0.54836	0.643181
15620_4_NLGN1_NLGN1.txt.gz	finngen_R9_CHIRBIL_PRIM.gz	outcome	15620_4_NLGN1_NLGN1.txt.gz	Weighted mode	8	0.353676	0.404078	0.410454
15622_13_OPCML_OBCAM.txt.gz	finngen_R9_CHIRBIL_PRIM.gz	outcome	15622_13_OPCML_OBCAM.txt.gz	MR Egger	14	-1.02553	1.02089	0.334946
15622_13_OPCML_OBCAM.txt.gz	finngen_R9_CHIRBIL_PRIM.gz	outcome	15622_13_OPCML_OBCAM.txt.gz	Weighted median	14	-0.214571	0.393187	0.585256
15622_13_OPCML_OBCAM.txt.gz	finngen_R9_CHIRBIL_PRIM.gz	outcome	15622_13_OPCML_OBCAM.txt.gz	Inverse variance weighted	14	0.240867	0.380836	0.527079
15622_13_OPCML_OBCAM.txt.gz	finngen_R9_CHIRBIL_PRIM.gz	outcome	15622_13_OPCML_OBCAM.txt.gz	Simple mode	14	-0.263443	0.581807	0.658156
15622_13_OPCML_OBCAM.txt.gz	finngen_R9_CHIRBIL_PRIM.gz	outcome	15622_13_OPCML_OBCAM.txt.gz	Weighted mode	14	-0.349504	0.438327	0.439564
15626_223_HSPG2_Perlecan.txt.gz	finngen_R9_CHIRBIL_PRIM.gz	outcome	15626_223_HSPG2_Perlecan.txt.gz	MR Egger	26	-0.320489	0.274749	0.254883
15626_223_HSPG2_Perlecan.txt.gz	finngen_R9_CHIRBIL_PRIM.gz	outcome	15626_223_HSPG2_Perlecan.txt.gz	Weighted median	26	-0.217103	0.229041	0.34319
15626_223_HSPG2_Perlecan.txt.gz	finngen_R9_CHIRBIL_PRIM.gz	outcome	15626_223_HSPG2_Perlecan.txt.gz	Inverse variance weighted	26	-0.138599	0.163861	0.397646
15626_223_HSPG2_Perlecan.txt.gz	finngen_R9_CHIRBIL_PRIM.gz	outcome	15626_223_HSPG2_Perlecan.txt.gz	Simple mode	26	0.325836	0.451552	0.47724
15626_223_HSPG2_Perlecan.txt.gz	finngen_R9_CHIRBIL_PRIM.gz	outcome	15626_223_HSPG2_Perlecan.txt.gz	Weighted mode	26	-0.125822	0.243976	0.610583
15633_6_RBP4_RBP.txt.gz	finngen_R9_CHIRBIL_PRIM.gz	outcome	15633_6_RBP4_RBP.txt.gz	Inverse variance weighted	2	0.223806	0.651867	0.73135
15635_4_SMOC2_SMOC2.txt.gz	finngen_R9_CHIRBIL_PRIM.gz	outcome	15635_4_SMOC2_SMOC2.txt.gz	MR Egger	64	-0.132127	0.173264	0.448607
15635_4_SMOC2_SMOC2.txt.gz	finngen_R9_CHIRBIL_PRIM.gz	outcome	15635_4_SMOC2_SMOC2.txt.gz	Weighted median	64	-0.090256	0.151119	0.550339
15635_4_SMOC2_SMOC2.txt.gz	finngen_R9_CHIRBIL_PRIM.gz	outcome	15635_4_SMOC2_SMOC2.txt.gz	Inverse variance weighted	64	-0.0985262	0.0910072	0.278978
15635_4_SMOC2_SMOC2.txt.gz	finngen_R9_CHIRBIL_PRIM.gz	outcome	15635_4_SMOC2_SMOC2.txt.gz	Simple mode	64	0.335301	0.26233	0.205881
15635_4_SMOC2_SMOC2.txt.gz	finngen_R9_CHIRBIL_PRIM.gz	outcome	15635_4_SMOC2_SMOC2.txt.gz	Weighted mode	64	0.0492426	0.158058	0.756413
15644_1_BTD_Biotinidase.txt.gz	finngen_R9_CHIRBIL_PRIM.gz	outcome	15644_1_BTD_Biotinidase.txt.gz	MR Egger	71	-0.0489368	0.10565	0.644681
15644_1_BTD_Biotinidase.txt.gz	finngen_R9_CHIRBIL_PRIM.gz	outcome	15644_1_BTD_Biotinidase.txt.gz	Weighted median	71	-0.0307863	0.10864	0.776886
15644_1_BTD_Biotinidase.txt.gz	finngen_R9_CHIRBIL_PRIM.gz	outcome	15644_1_BTD_Biotinidase.txt.gz	Inverse variance weighted	71	-0.0426119	0.0720477	0.554226
15644_1_BTD_Biotinidase.txt.gz	finngen_R9_CHIRBIL_PRIM.gz	outcome	15644_1_BTD_Biotinidase.txt.gz	Simple mode	71	-0.115642	0.231559	0.619059
15644_1_BTD_Biotinidase.txt.gz	finngen_R9_CHIRBIL_PRIM.gz	outcome	15644_1_BTD_Biotinidase.txt.gz	Weighted mode	71	-0.0442868	0.0978664	0.652291
15653_9_COL10A1_COAA1.txt.gz	finngen_R9_CHIRBIL_PRIM.gz	outcome	15653_9_COL10A1_COAA1.txt.gz	MR Egger	28	-0.424883	0.307665	0.179037
15653_9_COL10A1_COAA1.txt.gz	finngen_R9_CHIRBIL_PRIM.gz	outcome	15653_9_COL10A1_COAA1.txt.gz	Weighted median	28	-0.135057	0.222765	0.544332
15653_9_COL10A1_COAA1.txt.gz	finngen_R9_CHIRBIL_PRIM.gz	outcome	15653_9_COL10A1_COAA1.txt.gz	Inverse variance weighted	28	-0.0644409	0.156273	0.680074
15653_9_COL10A1_COAA1.txt.gz	finngen_R9_CHIRBIL_PRIM.gz	outcome	15653_9_COL10A1_COAA1.txt.gz	Simple mode	28	0.0528224	0.367968	0.88692
15653_9_COL10A1_COAA1.txt.gz	finngen_R9_CHIRBIL_PRIM.gz	outcome	15653_9_COL10A1_COAA1.txt.gz	Weighted mode	28	-0.0842079	0.235984	0.723988
15686_49_INHBC_INHBC.txt.gz	finngen_R9_CHIRBIL_PRIM.gz	outcome	15686_49_INHBC_INHBC.txt.gz	MR Egger	113	-0.0648126	0.0735175	0.379901
15686_49_INHBC_INHBC.txt.gz	finngen_R9_CHIRBIL_PRIM.gz	outcome	15686_49_INHBC_INHBC.txt.gz	Weighted median	113	0.0688277	0.0515309	0.181661
15686_49_INHBC_INHBC.txt.gz	finngen_R9_CHIRBIL_PRIM.gz	outcome	15686_49_INHBC_INHBC.txt.gz	Inverse variance weighted	113	0.0220769	0.0369087	0.54974
15686_49_INHBC_INHBC.txt.gz	finngen_R9_CHIRBIL_PRIM.gz	outcome	15686_49_INHBC_INHBC.txt.gz	Simple mode	113	0.0729777	0.0929742	0.434155
15686_49_INHBC_INHBC.txt.gz	finngen_R9_CHIRBIL_PRIM.gz	outcome	15686_49_INHBC_INHBC.txt.gz	Weighted mode	113	0.0244666	0.0502209	0.627084
16035_8_FLT4_VEGF_sR3.txt.gz	finngen_R9_CHIRBIL_PRIM.gz	outcome	16035_8_FLT4_VEGF_sR3.txt.gz	MR Egger	10	0.385671	0.720297	0.60691
16035_8_FLT4_VEGF_sR3.txt.gz	finngen_R9_CHIRBIL_PRIM.gz	outcome	16035_8_FLT4_VEGF_sR3.txt.gz	Weighted median	10	0.579471	0.416565	0.164204
16035_8_FLT4_VEGF_sR3.txt.gz	finngen_R9_CHIRBIL_PRIM.gz	outcome	16035_8_FLT4_VEGF_sR3.txt.gz	Inverse variance weighted	10	0.722991	0.306171	0.0182061
16035_8_FLT4_VEGF_sR3.txt.gz	finngen_R9_CHIRBIL_PRIM.gz	outcome	16035_8_FLT4_VEGF_sR3.txt.gz	Simple mode	10	1.16673	0.698938	0.129402
16035_8_FLT4_VEGF_sR3.txt.gz	finngen_R9_CHIRBIL_PRIM.gz	outcome	16035_8_FLT4_VEGF_sR3.txt.gz	Weighted mode	10	0.396224	0.476791	0.427457
16049_43_OLR1_OLR1.txt.gz	finngen_R9_CHIRBIL_PRIM.gz	outcome	16049_43_OLR1_OLR1.txt.gz	Wald ratio	1	-1.5245	1.29124	0.237741
16055_3_CFHR5_complement_factor_H_related_5.txt.gz	finngen_R9_CHIRBIL_PRIM.gz	outcome	16055_3_CFHR5_complement_factor_H_related_5.txt.gz	MR Egger	38	-0.0845741	0.113328	0.460347
16055_3_CFHR5_complement_factor_H_related_5.txt.gz	finngen_R9_CHIRBIL_PRIM.gz	outcome	16055_3_CFHR5_complement_factor_H_related_5.txt.gz	Weighted median	38	0.00490515	0.105407	0.962883
16055_3_CFHR5_complement_factor_H_related_5.txt.gz	finngen_R9_CHIRBIL_PRIM.gz	outcome	16055_3_CFHR5_complement_factor_H_related_5.txt.gz	Inverse variance weighted	38	-0.00607019	0.0771042	0.93725
16055_3_CFHR5_complement_factor_H_related_5.txt.gz	finngen_R9_CHIRBIL_PRIM.gz	outcome	16055_3_CFHR5_complement_factor_H_related_5.txt.gz	Simple mode	38	0.070216	0.210876	0.741034
16055_3_CFHR5_complement_factor_H_related_5.txt.gz	finngen_R9_CHIRBIL_PRIM.gz	outcome	16055_3_CFHR5_complement_factor_H_related_5.txt.gz	Weighted mode	38	-0.0376968	0.0918747	0.683947
16057_6_IGF2R_IGF_II_receptor.txt.gz	finngen_R9_CHIRBIL_PRIM.gz	outcome	16057_6_IGF2R_IGF_II_receptor.txt.gz	MR Egger	62	0.0460114	0.142951	0.748671
16057_6_IGF2R_IGF_II_receptor.txt.gz	finngen_R9_CHIRBIL_PRIM.gz	outcome	16057_6_IGF2R_IGF_II_receptor.txt.gz	Weighted median	62	0.0841665	0.138682	0.543914
16057_6_IGF2R_IGF_II_receptor.txt.gz	finngen_R9_CHIRBIL_PRIM.gz	outcome	16057_6_IGF2R_IGF_II_receptor.txt.gz	Inverse variance weighted	62	0.152775	0.0876849	0.0814531
16057_6_IGF2R_IGF_II_receptor.txt.gz	finngen_R9_CHIRBIL_PRIM.gz	outcome	16057_6_IGF2R_IGF_II_receptor.txt.gz	Simple mode	62	0.206497	0.268734	0.445209
16057_6_IGF2R_IGF_II_receptor.txt.gz	finngen_R9_CHIRBIL_PRIM.gz	outcome	16057_6_IGF2R_IGF_II_receptor.txt.gz	Weighted mode	62	0.0557269	0.119776	0.643403
16060_99_NID2_NID2.txt.gz	finngen_R9_CHIRBIL_PRIM.gz	outcome	16060_99_NID2_NID2.txt.gz	MR Egger	94	-0.0902666	0.108445	0.407353
16060_99_NID2_NID2.txt.gz	finngen_R9_CHIRBIL_PRIM.gz	outcome	16060_99_NID2_NID2.txt.gz	Weighted median	94	-0.147255	0.0888502	0.097451
16060_99_NID2_NID2.txt.gz	finngen_R9_CHIRBIL_PRIM.gz	outcome	16060_99_NID2_NID2.txt.gz	Inverse variance weighted	94	-0.0674525	0.0621163	0.277521
16060_99_NID2_NID2.txt.gz	finngen_R9_CHIRBIL_PRIM.gz	outcome	16060_99_NID2_NID2.txt.gz	Simple mode	94	-0.0772987	0.142742	0.589439
16060_99_NID2_NID2.txt.gz	finngen_R9_CHIRBIL_PRIM.gz	outcome	16060_99_NID2_NID2.txt.gz	Weighted mode	94	-0.128827	0.0752689	0.0903115
16070_7_WIF1_WIF_1.txt.gz	finngen_R9_CHIRBIL_PRIM.gz	outcome	16070_7_WIF1_WIF_1.txt.gz	Inverse variance weighted	2	-0.292189	0.833394	0.725887
16079_2_TEC_TEC.txt.gz	finngen_R9_CHIRBIL_PRIM.gz	outcome	16079_2_TEC_TEC.txt.gz	MR Egger	10	0.216092	1.28233	0.870361
16079_2_TEC_TEC.txt.gz	finngen_R9_CHIRBIL_PRIM.gz	outcome	16079_2_TEC_TEC.txt.gz	Weighted median	10	-0.903449	0.398428	0.0233577
16079_2_TEC_TEC.txt.gz	finngen_R9_CHIRBIL_PRIM.gz	outcome	16079_2_TEC_TEC.txt.gz	Inverse variance weighted	10	-0.518958	0.39256	0.186174
16079_2_TEC_TEC.txt.gz	finngen_R9_CHIRBIL_PRIM.gz	outcome	16079_2_TEC_TEC.txt.gz	Simple mode	10	-0.903133	0.583034	0.155785
16079_2_TEC_TEC.txt.gz	finngen_R9_CHIRBIL_PRIM.gz	outcome	16079_2_TEC_TEC.txt.gz	Weighted mode	10	-0.94423	0.432349	0.0568073
16288_17_EPHA4_EPHA4.txt.gz	finngen_R9_CHIRBIL_PRIM.gz	outcome	16288_17_EPHA4_EPHA4.txt.gz	MR Egger	22	0.346015	0.369146	0.359767
16288_17_EPHA4_EPHA4.txt.gz	finngen_R9_CHIRBIL_PRIM.gz	outcome	16288_17_EPHA4_EPHA4.txt.gz	Weighted median	22	0.0110538	0.262352	0.966392
16288_17_EPHA4_EPHA4.txt.gz	finngen_R9_CHIRBIL_PRIM.gz	outcome	16288_17_EPHA4_EPHA4.txt.gz	Inverse variance weighted	22	0.0756651	0.184026	0.680952
16288_17_EPHA4_EPHA4.txt.gz	finngen_R9_CHIRBIL_PRIM.gz	outcome	16288_17_EPHA4_EPHA4.txt.gz	Simple mode	22	0.122007	0.397228	0.761758
16288_17_EPHA4_EPHA4.txt.gz	finngen_R9_CHIRBIL_PRIM.gz	outcome	16288_17_EPHA4_EPHA4.txt.gz	Weighted mode	22	0.0499201	0.349908	0.887914
16296_43_LGR5_LGR5.txt.gz	finngen_R9_CHIRBIL_PRIM.gz	outcome	16296_43_LGR5_LGR5.txt.gz	Inverse variance weighted	2	0.901351	0.850715	0.289362
16302_11_BPIFA2_SPLC2.txt.gz	finngen_R9_CHIRBIL_PRIM.gz	outcome	16302_11_BPIFA2_SPLC2.txt.gz	MR Egger	5	-2.70336	1.51756	0.172877
16302_11_BPIFA2_SPLC2.txt.gz	finngen_R9_CHIRBIL_PRIM.gz	outcome	16302_11_BPIFA2_SPLC2.txt.gz	Weighted median	5	0.628286	0.651129	0.334586
16302_11_BPIFA2_SPLC2.txt.gz	finngen_R9_CHIRBIL_PRIM.gz	outcome	16302_11_BPIFA2_SPLC2.txt.gz	Inverse variance weighted	5	0.374472	0.657816	0.569175
16302_11_BPIFA2_SPLC2.txt.gz	finngen_R9_CHIRBIL_PRIM.gz	outcome	16302_11_BPIFA2_SPLC2.txt.gz	Simple mode	5	0.832454	0.978717	0.442934
16302_11_BPIFA2_SPLC2.txt.gz	finngen_R9_CHIRBIL_PRIM.gz	outcome	16302_11_BPIFA2_SPLC2.txt.gz	Weighted mode	5	1.16711	0.969966	0.295224
16304_6_LGR4_LGR4.txt.gz	finngen_R9_CHIRBIL_PRIM.gz	outcome	16304_6_LGR4_LGR4.txt.gz	Inverse variance weighted	2	-0.775636	0.754489	0.303937
16318_12_ACVRL1_ALK_1.txt.gz	finngen_R9_CHIRBIL_PRIM.gz	outcome	16318_12_ACVRL1_ALK_1.txt.gz	MR Egger	14	0.0554571	0.409959	0.894637
16318_12_ACVRL1_ALK_1.txt.gz	finngen_R9_CHIRBIL_PRIM.gz	outcome	16318_12_ACVRL1_ALK_1.txt.gz	Weighted median	14	-0.129662	0.269359	0.630251
16318_12_ACVRL1_ALK_1.txt.gz	finngen_R9_CHIRBIL_PRIM.gz	outcome	16318_12_ACVRL1_ALK_1.txt.gz	Inverse variance weighted	14	-0.381207	0.214347	0.0753289
16318_12_ACVRL1_ALK_1.txt.gz	finngen_R9_CHIRBIL_PRIM.gz	outcome	16318_12_ACVRL1_ALK_1.txt.gz	Simple mode	14	-1.00307	0.583537	0.109329
16318_12_ACVRL1_ALK_1.txt.gz	finngen_R9_CHIRBIL_PRIM.gz	outcome	16318_12_ACVRL1_ALK_1.txt.gz	Weighted mode	14	-0.150657	0.286295	0.607591
16323_8_NRXN3_NRX3A.txt.gz	finngen_R9_CHIRBIL_PRIM.gz	outcome	16323_8_NRXN3_NRX3A.txt.gz	MR Egger	21	0.205349	0.395099	0.609247
16323_8_NRXN3_NRX3A.txt.gz	finngen_R9_CHIRBIL_PRIM.gz	outcome	16323_8_NRXN3_NRX3A.txt.gz	Weighted median	21	0.435168	0.250102	0.0818655
16323_8_NRXN3_NRX3A.txt.gz	finngen_R9_CHIRBIL_PRIM.gz	outcome	16323_8_NRXN3_NRX3A.txt.gz	Inverse variance weighted	21	0.288426	0.176867	0.102943
16323_8_NRXN3_NRX3A.txt.gz	finngen_R9_CHIRBIL_PRIM.gz	outcome	16323_8_NRXN3_NRX3A.txt.gz	Simple mode	21	0.159153	0.422433	0.710324
16323_8_NRXN3_NRX3A.txt.gz	finngen_R9_CHIRBIL_PRIM.gz	outcome	16323_8_NRXN3_NRX3A.txt.gz	Weighted mode	21	0.458706	0.262857	0.0963187
16324_38_TLR1_TLR1.txt.gz	finngen_R9_CHIRBIL_PRIM.gz	outcome	16324_38_TLR1_TLR1.txt.gz	MR Egger	8	0.69601	1.04108	0.528651
16324_38_TLR1_TLR1.txt.gz	finngen_R9_CHIRBIL_PRIM.gz	outcome	16324_38_TLR1_TLR1.txt.gz	Weighted median	8	1.28552	0.473961	0.00668199
16324_38_TLR1_TLR1.txt.gz	finngen_R9_CHIRBIL_PRIM.gz	outcome	16324_38_TLR1_TLR1.txt.gz	Inverse variance weighted	8	1.29342	0.38874	0.000877151
16324_38_TLR1_TLR1.txt.gz	finngen_R9_CHIRBIL_PRIM.gz	outcome	16324_38_TLR1_TLR1.txt.gz	Simple mode	8	2.39879	0.780525	0.0179837
16324_38_TLR1_TLR1.txt.gz	finngen_R9_CHIRBIL_PRIM.gz	outcome	16324_38_TLR1_TLR1.txt.gz	Weighted mode	8	1.24872	0.537045	0.0529898
16558_2_MYOC_MYOC.txt.gz	finngen_R9_CHIRBIL_PRIM.gz	outcome	16558_2_MYOC_MYOC.txt.gz	MR Egger	47	0.279308	0.234175	0.239226
16558_2_MYOC_MYOC.txt.gz	finngen_R9_CHIRBIL_PRIM.gz	outcome	16558_2_MYOC_MYOC.txt.gz	Weighted median	47	0.0248298	0.164635	0.88012
16558_2_MYOC_MYOC.txt.gz	finngen_R9_CHIRBIL_PRIM.gz	outcome	16558_2_MYOC_MYOC.txt.gz	Inverse variance weighted	47	0.0559356	0.109085	0.608111
16558_2_MYOC_MYOC.txt.gz	finngen_R9_CHIRBIL_PRIM.gz	outcome	16558_2_MYOC_MYOC.txt.gz	Simple mode	47	0.0716938	0.263677	0.786916
16558_2_MYOC_MYOC.txt.gz	finngen_R9_CHIRBIL_PRIM.gz	outcome	16558_2_MYOC_MYOC.txt.gz	Weighted mode	47	0.123199	0.180299	0.497843
16561_9_A1BG_Alpha_1B_glycoprotein.txt.gz	finngen_R9_CHIRBIL_PRIM.gz	outcome	16561_9_A1BG_Alpha_1B_glycoprotein.txt.gz	MR Egger	19	0.227119	0.211301	0.297459
16561_9_A1BG_Alpha_1B_glycoprotein.txt.gz	finngen_R9_CHIRBIL_PRIM.gz	outcome	16561_9_A1BG_Alpha_1B_glycoprotein.txt.gz	Weighted median	19	0.245097	0.188714	0.19402
16561_9_A1BG_Alpha_1B_glycoprotein.txt.gz	finngen_R9_CHIRBIL_PRIM.gz	outcome	16561_9_A1BG_Alpha_1B_glycoprotein.txt.gz	Inverse variance weighted	19	0.121209	0.147668	0.411749
16561_9_A1BG_Alpha_1B_glycoprotein.txt.gz	finngen_R9_CHIRBIL_PRIM.gz	outcome	16561_9_A1BG_Alpha_1B_glycoprotein.txt.gz	Simple mode	19	0.113038	0.310995	0.720486
16561_9_A1BG_Alpha_1B_glycoprotein.txt.gz	finngen_R9_CHIRBIL_PRIM.gz	outcome	16561_9_A1BG_Alpha_1B_glycoprotein.txt.gz	Weighted mode	19	0.186274	0.202348	0.369451
16605_2_C1QTNF9_C1T9A.txt.gz	finngen_R9_CHIRBIL_PRIM.gz	outcome	16605_2_C1QTNF9_C1T9A.txt.gz	MR Egger	15	0.282999	0.58015	0.633813
16605_2_C1QTNF9_C1T9A.txt.gz	finngen_R9_CHIRBIL_PRIM.gz	outcome	16605_2_C1QTNF9_C1T9A.txt.gz	Weighted median	15	0.463728	0.283088	0.1014
16605_2_C1QTNF9_C1T9A.txt.gz	finngen_R9_CHIRBIL_PRIM.gz	outcome	16605_2_C1QTNF9_C1T9A.txt.gz	Inverse variance weighted	15	0.132978	0.282617	0.63798
16605_2_C1QTNF9_C1T9A.txt.gz	finngen_R9_CHIRBIL_PRIM.gz	outcome	16605_2_C1QTNF9_C1T9A.txt.gz	Simple mode	15	0.416335	0.494537	0.414012
16605_2_C1QTNF9_C1T9A.txt.gz	finngen_R9_CHIRBIL_PRIM.gz	outcome	16605_2_C1QTNF9_C1T9A.txt.gz	Weighted mode	15	0.43652	0.294502	0.160436
16606_85_AKR1B1_Aldose_reductase.txt.gz	finngen_R9_CHIRBIL_PRIM.gz	outcome	16606_85_AKR1B1_Aldose_reductase.txt.gz	Inverse variance weighted	2	0.0947216	0.62082	0.878734
16607_78_GSN_Gelsolin.txt.gz	finngen_R9_CHIRBIL_PRIM.gz	outcome	16607_78_GSN_Gelsolin.txt.gz	MR Egger	14	0.425761	0.269643	0.140325
16607_78_GSN_Gelsolin.txt.gz	finngen_R9_CHIRBIL_PRIM.gz	outcome	16607_78_GSN_Gelsolin.txt.gz	Weighted median	14	0.0293783	0.250788	0.906746
16607_78_GSN_Gelsolin.txt.gz	finngen_R9_CHIRBIL_PRIM.gz	outcome	16607_78_GSN_Gelsolin.txt.gz	Inverse variance weighted	14	0.116552	0.182268	0.522528
16607_78_GSN_Gelsolin.txt.gz	finngen_R9_CHIRBIL_PRIM.gz	outcome	16607_78_GSN_Gelsolin.txt.gz	Simple mode	14	-0.135972	0.481299	0.782
16607_78_GSN_Gelsolin.txt.gz	finngen_R9_CHIRBIL_PRIM.gz	outcome	16607_78_GSN_Gelsolin.txt.gz	Weighted mode	14	0.419783	0.29786	0.182209
16609_106_KIRREL2_KIRR2.txt.gz	finngen_R9_CHIRBIL_PRIM.gz	outcome	16609_106_KIRREL2_KIRR2.txt.gz	MR Egger	53	0.0157583	0.107834	0.884391
16609_106_KIRREL2_KIRR2.txt.gz	finngen_R9_CHIRBIL_PRIM.gz	outcome	16609_106_KIRREL2_KIRR2.txt.gz	Weighted median	53	0.00695215	0.120917	0.954151
16609_106_KIRREL2_KIRR2.txt.gz	finngen_R9_CHIRBIL_PRIM.gz	outcome	16609_106_KIRREL2_KIRR2.txt.gz	Inverse variance weighted	53	-0.0731665	0.0753922	0.331808
16609_106_KIRREL2_KIRR2.txt.gz	finngen_R9_CHIRBIL_PRIM.gz	outcome	16609_106_KIRREL2_KIRR2.txt.gz	Simple mode	53	0.0322045	0.221089	0.88475
16609_106_KIRREL2_KIRR2.txt.gz	finngen_R9_CHIRBIL_PRIM.gz	outcome	16609_106_KIRREL2_KIRR2.txt.gz	Weighted mode	53	-0.0261272	0.119422	0.827678
16614_27_RSPO1_RSPO1.txt.gz	finngen_R9_CHIRBIL_PRIM.gz	outcome	16614_27_RSPO1_RSPO1.txt.gz	MR Egger	7	-0.656607	0.448685	0.203227
16614_27_RSPO1_RSPO1.txt.gz	finngen_R9_CHIRBIL_PRIM.gz	outcome	16614_27_RSPO1_RSPO1.txt.gz	Weighted median	7	-0.529916	0.370554	0.152698
16614_27_RSPO1_RSPO1.txt.gz	finngen_R9_CHIRBIL_PRIM.gz	outcome	16614_27_RSPO1_RSPO1.txt.gz	Inverse variance weighted	7	-0.0446743	0.380693	0.906583
16614_27_RSPO1_RSPO1.txt.gz	finngen_R9_CHIRBIL_PRIM.gz	outcome	16614_27_RSPO1_RSPO1.txt.gz	Simple mode	7	0.413608	0.673503	0.561686
16614_27_RSPO1_RSPO1.txt.gz	finngen_R9_CHIRBIL_PRIM.gz	outcome	16614_27_RSPO1_RSPO1.txt.gz	Weighted mode	7	-0.404189	0.332488	0.269774
16620_26_LY75_LY75.txt.gz	finngen_R9_CHIRBIL_PRIM.gz	outcome	16620_26_LY75_LY75.txt.gz	MR Egger	119	0.0256001	0.0662721	0.699985
16620_26_LY75_LY75.txt.gz	finngen_R9_CHIRBIL_PRIM.gz	outcome	16620_26_LY75_LY75.txt.gz	Weighted median	119	0.0688957	0.0538059	0.200388
16620_26_LY75_LY75.txt.gz	finngen_R9_CHIRBIL_PRIM.gz	outcome	16620_26_LY75_LY75.txt.gz	Inverse variance weighted	119	-0.0168443	0.0345372	0.625753
16620_26_LY75_LY75.txt.gz	finngen_R9_CHIRBIL_PRIM.gz	outcome	16620_26_LY75_LY75.txt.gz	Simple mode	119	0.0575615	0.0925892	0.535347
16620_26_LY75_LY75.txt.gz	finngen_R9_CHIRBIL_PRIM.gz	outcome	16620_26_LY75_LY75.txt.gz	Weighted mode	119	0.011781	0.0553385	0.83178
16621_77_APOA1BP_AIBP.txt.gz	finngen_R9_CHIRBIL_PRIM.gz	outcome	16621_77_APOA1BP_AIBP.txt.gz	Inverse variance weighted	2	0.336216	0.337252	0.318799
16751_15_NPPB_BNP.txt.gz	finngen_R9_CHIRBIL_PRIM.gz	outcome	16751_15_NPPB_BNP.txt.gz	MR Egger	3	-4.00852	2.02233	0.297459
16751_15_NPPB_BNP.txt.gz	finngen_R9_CHIRBIL_PRIM.gz	outcome	16751_15_NPPB_BNP.txt.gz	Weighted median	3	-1.07602	0.645574	0.095562
16751_15_NPPB_BNP.txt.gz	finngen_R9_CHIRBIL_PRIM.gz	outcome	16751_15_NPPB_BNP.txt.gz	Inverse variance weighted	3	-1.06135	0.620478	0.0871678
16751_15_NPPB_BNP.txt.gz	finngen_R9_CHIRBIL_PRIM.gz	outcome	16751_15_NPPB_BNP.txt.gz	Simple mode	3	-1.20255	0.849781	0.292665
16751_15_NPPB_BNP.txt.gz	finngen_R9_CHIRBIL_PRIM.gz	outcome	16751_15_NPPB_BNP.txt.gz	Weighted mode	3	-1.09877	0.732812	0.272533
16753_46_COL6A2_CO6A2.txt.gz	finngen_R9_CHIRBIL_PRIM.gz	outcome	16753_46_COL6A2_CO6A2.txt.gz	MR Egger	37	-0.0816879	0.268743	0.762956
16753_46_COL6A2_CO6A2.txt.gz	finngen_R9_CHIRBIL_PRIM.gz	outcome	16753_46_COL6A2_CO6A2.txt.gz	Weighted median	37	-0.0687065	0.192071	0.720557
16753_46_COL6A2_CO6A2.txt.gz	finngen_R9_CHIRBIL_PRIM.gz	outcome	16753_46_COL6A2_CO6A2.txt.gz	Inverse variance weighted	37	-0.0927662	0.147082	0.52823
16753_46_COL6A2_CO6A2.txt.gz	finngen_R9_CHIRBIL_PRIM.gz	outcome	16753_46_COL6A2_CO6A2.txt.gz	Simple mode	37	0.00687154	0.326723	0.983336
16753_46_COL6A2_CO6A2.txt.gz	finngen_R9_CHIRBIL_PRIM.gz	outcome	16753_46_COL6A2_CO6A2.txt.gz	Weighted mode	37	-0.0131275	0.195676	0.946883
16758_96_HDGF_HDGF.txt.gz	finngen_R9_CHIRBIL_PRIM.gz	outcome	16758_96_HDGF_HDGF.txt.gz	Wald ratio	1	-0.100797	0.836954	0.90414
16763_11_LECT2_LECT2.txt.gz	finngen_R9_CHIRBIL_PRIM.gz	outcome	16763_11_LECT2_LECT2.txt.gz	MR Egger	102	0.0518235	0.084213	0.539698
16763_11_LECT2_LECT2.txt.gz	finngen_R9_CHIRBIL_PRIM.gz	outcome	16763_11_LECT2_LECT2.txt.gz	Weighted median	102	0.0440811	0.0817589	0.589777
16763_11_LECT2_LECT2.txt.gz	finngen_R9_CHIRBIL_PRIM.gz	outcome	16763_11_LECT2_LECT2.txt.gz	Inverse variance weighted	102	0.028562	0.0535374	0.59369
16763_11_LECT2_LECT2.txt.gz	finngen_R9_CHIRBIL_PRIM.gz	outcome	16763_11_LECT2_LECT2.txt.gz	Simple mode	102	-0.0316873	0.158401	0.841848
16763_11_LECT2_LECT2.txt.gz	finngen_R9_CHIRBIL_PRIM.gz	outcome	16763_11_LECT2_LECT2.txt.gz	Weighted mode	102	0.0687488	0.0756728	0.365777
16770_3_REG1B_REG1B.txt.gz	finngen_R9_CHIRBIL_PRIM.gz	outcome	16770_3_REG1B_REG1B.txt.gz	MR Egger	56	-0.157492	0.1609	0.332035
16770_3_REG1B_REG1B.txt.gz	finngen_R9_CHIRBIL_PRIM.gz	outcome	16770_3_REG1B_REG1B.txt.gz	Weighted median	56	0.0534671	0.14891	0.719554
16770_3_REG1B_REG1B.txt.gz	finngen_R9_CHIRBIL_PRIM.gz	outcome	16770_3_REG1B_REG1B.txt.gz	Inverse variance weighted	56	-0.0262378	0.0950082	0.782422
16770_3_REG1B_REG1B.txt.gz	finngen_R9_CHIRBIL_PRIM.gz	outcome	16770_3_REG1B_REG1B.txt.gz	Simple mode	56	0.147987	0.275355	0.59313
16770_3_REG1B_REG1B.txt.gz	finngen_R9_CHIRBIL_PRIM.gz	outcome	16770_3_REG1B_REG1B.txt.gz	Weighted mode	56	0.0524357	0.151283	0.73021
16773_29_SCUBE3_SCUB3.txt.gz	finngen_R9_CHIRBIL_PRIM.gz	outcome	16773_29_SCUBE3_SCUB3.txt.gz	MR Egger	18	-0.447489	0.348534	0.217453
16773_29_SCUBE3_SCUB3.txt.gz	finngen_R9_CHIRBIL_PRIM.gz	outcome	16773_29_SCUBE3_SCUB3.txt.gz	Weighted median	18	-0.538073	0.235933	0.022571
16773_29_SCUBE3_SCUB3.txt.gz	finngen_R9_CHIRBIL_PRIM.gz	outcome	16773_29_SCUBE3_SCUB3.txt.gz	Inverse variance weighted	18	-0.436307	0.188615	0.0207109
16773_29_SCUBE3_SCUB3.txt.gz	finngen_R9_CHIRBIL_PRIM.gz	outcome	16773_29_SCUBE3_SCUB3.txt.gz	Simple mode	18	-0.45774	0.371155	0.234251
16773_29_SCUBE3_SCUB3.txt.gz	finngen_R9_CHIRBIL_PRIM.gz	outcome	16773_29_SCUBE3_SCUB3.txt.gz	Weighted mode	18	-0.535934	0.255778	0.0514242
16781_2_ENGASE_ENASE.txt.gz	finngen_R9_CHIRBIL_PRIM.gz	outcome	16781_2_ENGASE_ENASE.txt.gz	MR Egger	92	0.0423601	0.0873848	0.629029
16781_2_ENGASE_ENASE.txt.gz	finngen_R9_CHIRBIL_PRIM.gz	outcome	16781_2_ENGASE_ENASE.txt.gz	Weighted median	92	0.0112032	0.0860394	0.8964
16781_2_ENGASE_ENASE.txt.gz	finngen_R9_CHIRBIL_PRIM.gz	outcome	16781_2_ENGASE_ENASE.txt.gz	Inverse variance weighted	92	-0.0228114	0.0571157	0.689607
16781_2_ENGASE_ENASE.txt.gz	finngen_R9_CHIRBIL_PRIM.gz	outcome	16781_2_ENGASE_ENASE.txt.gz	Simple mode	92	0.0120918	0.142693	0.932654
16781_2_ENGASE_ENASE.txt.gz	finngen_R9_CHIRBIL_PRIM.gz	outcome	16781_2_ENGASE_ENASE.txt.gz	Weighted mode	92	0.0120918	0.0792426	0.879058
16785_45_DEFA5_HD_5.txt.gz	finngen_R9_CHIRBIL_PRIM.gz	outcome	16785_45_DEFA5_HD_5.txt.gz	Inverse variance weighted	2	-0.00637507	0.508148	0.98999
16792_4_SIGLEC5_Siglec_5.txt.gz	finngen_R9_CHIRBIL_PRIM.gz	outcome	16792_4_SIGLEC5_Siglec_5.txt.gz	MR Egger	195	0.057405	0.0482698	0.235801
16792_4_SIGLEC5_Siglec_5.txt.gz	finngen_R9_CHIRBIL_PRIM.gz	outcome	16792_4_SIGLEC5_Siglec_5.txt.gz	Weighted median	195	0.0212481	0.0505099	0.673996
16792_4_SIGLEC5_Siglec_5.txt.gz	finngen_R9_CHIRBIL_PRIM.gz	outcome	16792_4_SIGLEC5_Siglec_5.txt.gz	Inverse variance weighted	195	0.0437566	0.0325508	0.178866
16792_4_SIGLEC5_Siglec_5.txt.gz	finngen_R9_CHIRBIL_PRIM.gz	outcome	16792_4_SIGLEC5_Siglec_5.txt.gz	Simple mode	195	0.0128555	0.0987294	0.896535
16792_4_SIGLEC5_Siglec_5.txt.gz	finngen_R9_CHIRBIL_PRIM.gz	outcome	16792_4_SIGLEC5_Siglec_5.txt.gz	Weighted mode	195	0.0718453	0.0431306	0.0973751
16805_5_PDE5A_PDE5A.txt.gz	finngen_R9_CHIRBIL_PRIM.gz	outcome	16805_5_PDE5A_PDE5A.txt.gz	MR Egger	26	0.0183893	0.444816	0.967366
16805_5_PDE5A_PDE5A.txt.gz	finngen_R9_CHIRBIL_PRIM.gz	outcome	16805_5_PDE5A_PDE5A.txt.gz	Weighted median	26	0.106048	0.273756	0.698473
16805_5_PDE5A_PDE5A.txt.gz	finngen_R9_CHIRBIL_PRIM.gz	outcome	16805_5_PDE5A_PDE5A.txt.gz	Inverse variance weighted	26	0.129486	0.189185	0.493698
16805_5_PDE5A_PDE5A.txt.gz	finngen_R9_CHIRBIL_PRIM.gz	outcome	16805_5_PDE5A_PDE5A.txt.gz	Simple mode	26	-0.233863	0.459426	0.615192
16805_5_PDE5A_PDE5A.txt.gz	finngen_R9_CHIRBIL_PRIM.gz	outcome	16805_5_PDE5A_PDE5A.txt.gz	Weighted mode	26	0.0929065	0.284651	0.746848
16818_200_CDCP1_CDCP1.txt.gz	finngen_R9_CHIRBIL_PRIM.gz	outcome	16818_200_CDCP1_CDCP1.txt.gz	MR Egger	32	0.155852	0.371511	0.677833
16818_200_CDCP1_CDCP1.txt.gz	finngen_R9_CHIRBIL_PRIM.gz	outcome	16818_200_CDCP1_CDCP1.txt.gz	Weighted median	32	0.269819	0.221331	0.222814
16818_200_CDCP1_CDCP1.txt.gz	finngen_R9_CHIRBIL_PRIM.gz	outcome	16818_200_CDCP1_CDCP1.txt.gz	Inverse variance weighted	32	0.212723	0.172877	0.218514
16818_200_CDCP1_CDCP1.txt.gz	finngen_R9_CHIRBIL_PRIM.gz	outcome	16818_200_CDCP1_CDCP1.txt.gz	Simple mode	32	0.208377	0.423201	0.625917
16818_200_CDCP1_CDCP1.txt.gz	finngen_R9_CHIRBIL_PRIM.gz	outcome	16818_200_CDCP1_CDCP1.txt.gz	Weighted mode	32	0.303443	0.226243	0.189591
16828_8_COL6A1_Collagen_a1_VI_.txt.gz	finngen_R9_CHIRBIL_PRIM.gz	outcome	16828_8_COL6A1_Collagen_a1_VI_.txt.gz	MR Egger	151	-0.0203573	0.0596485	0.733367
16828_8_COL6A1_Collagen_a1_VI_.txt.gz	finngen_R9_CHIRBIL_PRIM.gz	outcome	16828_8_COL6A1_Collagen_a1_VI_.txt.gz	Weighted median	151	0.0336331	0.0520651	0.518291
16828_8_COL6A1_Collagen_a1_VI_.txt.gz	finngen_R9_CHIRBIL_PRIM.gz	outcome	16828_8_COL6A1_Collagen_a1_VI_.txt.gz	Inverse variance weighted	151	0.0309951	0.0342865	0.365994
16828_8_COL6A1_Collagen_a1_VI_.txt.gz	finngen_R9_CHIRBIL_PRIM.gz	outcome	16828_8_COL6A1_Collagen_a1_VI_.txt.gz	Simple mode	151	0.0419652	0.10106	0.678552
16828_8_COL6A1_Collagen_a1_VI_.txt.gz	finngen_R9_CHIRBIL_PRIM.gz	outcome	16828_8_COL6A1_Collagen_a1_VI_.txt.gz	Weighted mode	151	0.0230677	0.0545531	0.673011
16836_1_CFHR3_FHR3.txt.gz	finngen_R9_CHIRBIL_PRIM.gz	outcome	16836_1_CFHR3_FHR3.txt.gz	MR Egger	4	0.151607	1.3098	0.918427
16836_1_CFHR3_FHR3.txt.gz	finngen_R9_CHIRBIL_PRIM.gz	outcome	16836_1_CFHR3_FHR3.txt.gz	Weighted median	4	0.331554	0.523539	0.526542
16836_1_CFHR3_FHR3.txt.gz	finngen_R9_CHIRBIL_PRIM.gz	outcome	16836_1_CFHR3_FHR3.txt.gz	Inverse variance weighted	4	0.392899	0.470555	0.403735
16836_1_CFHR3_FHR3.txt.gz	finngen_R9_CHIRBIL_PRIM.gz	outcome	16836_1_CFHR3_FHR3.txt.gz	Simple mode	4	0.551039	0.79584	0.538468
16836_1_CFHR3_FHR3.txt.gz	finngen_R9_CHIRBIL_PRIM.gz	outcome	16836_1_CFHR3_FHR3.txt.gz	Weighted mode	4	0.24447	0.535313	0.678934
16872_248_GSTZ1_MAAI.txt.gz	finngen_R9_CHIRBIL_PRIM.gz	outcome	16872_248_GSTZ1_MAAI.txt.gz	MR Egger	178	-0.010746	0.0461823	0.816276
16872_248_GSTZ1_MAAI.txt.gz	finngen_R9_CHIRBIL_PRIM.gz	outcome	16872_248_GSTZ1_MAAI.txt.gz	Weighted median	178	-0.0197751	0.0426656	0.643012
16872_248_GSTZ1_MAAI.txt.gz	finngen_R9_CHIRBIL_PRIM.gz	outcome	16872_248_GSTZ1_MAAI.txt.gz	Inverse variance weighted	178	-0.00423403	0.0276949	0.878492
16872_248_GSTZ1_MAAI.txt.gz	finngen_R9_CHIRBIL_PRIM.gz	outcome	16872_248_GSTZ1_MAAI.txt.gz	Simple mode	178	-0.0663787	0.0713942	0.353767
16872_248_GSTZ1_MAAI.txt.gz	finngen_R9_CHIRBIL_PRIM.gz	outcome	16872_248_GSTZ1_MAAI.txt.gz	Weighted mode	178	-0.0165261	0.0391738	0.673635
16890_37_ADAMTSL1_ATL1.txt.gz	finngen_R9_CHIRBIL_PRIM.gz	outcome	16890_37_ADAMTSL1_ATL1.txt.gz	MR Egger	53	0.288287	0.185411	0.126166
16890_37_ADAMTSL1_ATL1.txt.gz	finngen_R9_CHIRBIL_PRIM.gz	outcome	16890_37_ADAMTSL1_ATL1.txt.gz	Weighted median	53	0.13546	0.147748	0.35923
16890_37_ADAMTSL1_ATL1.txt.gz	finngen_R9_CHIRBIL_PRIM.gz	outcome	16890_37_ADAMTSL1_ATL1.txt.gz	Inverse variance weighted	53	0.269223	0.0998586	0.00701698
16890_37_ADAMTSL1_ATL1.txt.gz	finngen_R9_CHIRBIL_PRIM.gz	outcome	16890_37_ADAMTSL1_ATL1.txt.gz	Simple mode	53	0.291427	0.2232	0.197409
16890_37_ADAMTSL1_ATL1.txt.gz	finngen_R9_CHIRBIL_PRIM.gz	outcome	16890_37_ADAMTSL1_ATL1.txt.gz	Weighted mode	53	0.140589	0.152427	0.360615
16892_23_ENPP2_ENPP2.txt.gz	finngen_R9_CHIRBIL_PRIM.gz	outcome	16892_23_ENPP2_ENPP2.txt.gz	MR Egger	20	1.14054	0.681943	0.111721
16892_23_ENPP2_ENPP2.txt.gz	finngen_R9_CHIRBIL_PRIM.gz	outcome	16892_23_ENPP2_ENPP2.txt.gz	Weighted median	20	0.0107491	0.299143	0.971336
16892_23_ENPP2_ENPP2.txt.gz	finngen_R9_CHIRBIL_PRIM.gz	outcome	16892_23_ENPP2_ENPP2.txt.gz	Inverse variance weighted	20	0.143948	0.210058	0.493168
16892_23_ENPP2_ENPP2.txt.gz	finngen_R9_CHIRBIL_PRIM.gz	outcome	16892_23_ENPP2_ENPP2.txt.gz	Simple mode	20	0.0944677	0.45011	0.835998
16892_23_ENPP2_ENPP2.txt.gz	finngen_R9_CHIRBIL_PRIM.gz	outcome	16892_23_ENPP2_ENPP2.txt.gz	Weighted mode	20	-0.0284321	0.379161	0.941009
16908_5_OMG_OMGP.txt.gz	finngen_R9_CHIRBIL_PRIM.gz	outcome	16908_5_OMG_OMGP.txt.gz	Wald ratio	1	-0.562329	1.64897	0.73309
16913_8_RNASET2_RNT2.txt.gz	finngen_R9_CHIRBIL_PRIM.gz	outcome	16913_8_RNASET2_RNT2.txt.gz	MR Egger	54	-0.000954589	0.155468	0.995124
16913_8_RNASET2_RNT2.txt.gz	finngen_R9_CHIRBIL_PRIM.gz	outcome	16913_8_RNASET2_RNT2.txt.gz	Weighted median	54	-0.159547	0.143428	0.265974
16913_8_RNASET2_RNT2.txt.gz	finngen_R9_CHIRBIL_PRIM.gz	outcome	16913_8_RNASET2_RNT2.txt.gz	Inverse variance weighted	54	-0.086548	0.0945164	0.359828
16913_8_RNASET2_RNT2.txt.gz	finngen_R9_CHIRBIL_PRIM.gz	outcome	16913_8_RNASET2_RNT2.txt.gz	Simple mode	54	-0.0302068	0.246434	0.902907
16913_8_RNASET2_RNT2.txt.gz	finngen_R9_CHIRBIL_PRIM.gz	outcome	16913_8_RNASET2_RNT2.txt.gz	Weighted mode	54	-0.132351	0.137299	0.339443
16914_104_CD14_sCD14.txt.gz	finngen_R9_CHIRBIL_PRIM.gz	outcome	16914_104_CD14_sCD14.txt.gz	MR Egger	32	0.108746	0.308019	0.726521
16914_104_CD14_sCD14.txt.gz	finngen_R9_CHIRBIL_PRIM.gz	outcome	16914_104_CD14_sCD14.txt.gz	Weighted median	32	0.353217	0.200595	0.0782649
16914_104_CD14_sCD14.txt.gz	finngen_R9_CHIRBIL_PRIM.gz	outcome	16914_104_CD14_sCD14.txt.gz	Inverse variance weighted	32	0.0539193	0.139445	0.699
16914_104_CD14_sCD14.txt.gz	finngen_R9_CHIRBIL_PRIM.gz	outcome	16914_104_CD14_sCD14.txt.gz	Simple mode	32	0.1831	0.375464	0.629219
16914_104_CD14_sCD14.txt.gz	finngen_R9_CHIRBIL_PRIM.gz	outcome	16914_104_CD14_sCD14.txt.gz	Weighted mode	32	0.327033	0.23422	0.172553
16918_198_TLR3_TLR3.txt.gz	finngen_R9_CHIRBIL_PRIM.gz	outcome	16918_198_TLR3_TLR3.txt.gz	MR Egger	161	0.0188583	0.0927301	0.839108
16918_198_TLR3_TLR3.txt.gz	finngen_R9_CHIRBIL_PRIM.gz	outcome	16918_198_TLR3_TLR3.txt.gz	Weighted median	161	-0.0467045	0.0838575	0.577561
16918_198_TLR3_TLR3.txt.gz	finngen_R9_CHIRBIL_PRIM.gz	outcome	16918_198_TLR3_TLR3.txt.gz	Inverse variance weighted	161	-0.0324248	0.0513323	0.527606
16918_198_TLR3_TLR3.txt.gz	finngen_R9_CHIRBIL_PRIM.gz	outcome	16918_198_TLR3_TLR3.txt.gz	Simple mode	161	-0.0776235	0.167643	0.643973
16918_198_TLR3_TLR3.txt.gz	finngen_R9_CHIRBIL_PRIM.gz	outcome	16918_198_TLR3_TLR3.txt.gz	Weighted mode	161	-0.0438768	0.0900856	0.626884
17138_8_GSTA1_GST_A1_1.txt.gz	finngen_R9_CHIRBIL_PRIM.gz	outcome	17138_8_GSTA1_GST_A1_1.txt.gz	MR Egger	39	-0.223931	0.204815	0.281314
17138_8_GSTA1_GST_A1_1.txt.gz	finngen_R9_CHIRBIL_PRIM.gz	outcome	17138_8_GSTA1_GST_A1_1.txt.gz	Weighted median	39	-0.0695037	0.156719	0.657409
17138_8_GSTA1_GST_A1_1.txt.gz	finngen_R9_CHIRBIL_PRIM.gz	outcome	17138_8_GSTA1_GST_A1_1.txt.gz	Inverse variance weighted	39	-0.00962523	0.121115	0.936657
17138_8_GSTA1_GST_A1_1.txt.gz	finngen_R9_CHIRBIL_PRIM.gz	outcome	17138_8_GSTA1_GST_A1_1.txt.gz	Simple mode	39	-0.0907321	0.328707	0.784023
17138_8_GSTA1_GST_A1_1.txt.gz	finngen_R9_CHIRBIL_PRIM.gz	outcome	17138_8_GSTA1_GST_A1_1.txt.gz	Weighted mode	39	-0.0907321	0.148366	0.544482
17140_57_PDGFD_PDGFD.txt.gz	finngen_R9_CHIRBIL_PRIM.gz	outcome	17140_57_PDGFD_PDGFD.txt.gz	MR Egger	57	0.0900322	0.209141	0.668524
17140_57_PDGFD_PDGFD.txt.gz	finngen_R9_CHIRBIL_PRIM.gz	outcome	17140_57_PDGFD_PDGFD.txt.gz	Weighted median	57	0.0931648	0.150124	0.534872
17140_57_PDGFD_PDGFD.txt.gz	finngen_R9_CHIRBIL_PRIM.gz	outcome	17140_57_PDGFD_PDGFD.txt.gz	Inverse variance weighted	57	0.0476293	0.101012	0.637267
17140_57_PDGFD_PDGFD.txt.gz	finngen_R9_CHIRBIL_PRIM.gz	outcome	17140_57_PDGFD_PDGFD.txt.gz	Simple mode	57	-0.327873	0.299831	0.278844
17140_57_PDGFD_PDGFD.txt.gz	finngen_R9_CHIRBIL_PRIM.gz	outcome	17140_57_PDGFD_PDGFD.txt.gz	Weighted mode	57	0.0865355	0.145164	0.553494
17153_46_KIR2DL3_KI2L3.txt.gz	finngen_R9_CHIRBIL_PRIM.gz	outcome	17153_46_KIR2DL3_KI2L3.txt.gz	MR Egger	117	0.0301766	0.101096	0.765865
17153_46_KIR2DL3_KI2L3.txt.gz	finngen_R9_CHIRBIL_PRIM.gz	outcome	17153_46_KIR2DL3_KI2L3.txt.gz	Weighted median	117	-0.0137295	0.0993981	0.890141
17153_46_KIR2DL3_KI2L3.txt.gz	finngen_R9_CHIRBIL_PRIM.gz	outcome	17153_46_KIR2DL3_KI2L3.txt.gz	Inverse variance weighted	117	0.0290035	0.0597838	0.627577
17153_46_KIR2DL3_KI2L3.txt.gz	finngen_R9_CHIRBIL_PRIM.gz	outcome	17153_46_KIR2DL3_KI2L3.txt.gz	Simple mode	117	-0.178097	0.164669	0.2817
17153_46_KIR2DL3_KI2L3.txt.gz	finngen_R9_CHIRBIL_PRIM.gz	outcome	17153_46_KIR2DL3_KI2L3.txt.gz	Weighted mode	117	-0.0794419	0.0990748	0.424287
17156_72_DCLK1_DCAK1.txt.gz	finngen_R9_CHIRBIL_PRIM.gz	outcome	17156_72_DCLK1_DCAK1.txt.gz	MR Egger	9	-0.115404	0.530874	0.834109
17156_72_DCLK1_DCAK1.txt.gz	finngen_R9_CHIRBIL_PRIM.gz	outcome	17156_72_DCLK1_DCAK1.txt.gz	Weighted median	9	0.225012	0.298019	0.450232
17156_72_DCLK1_DCAK1.txt.gz	finngen_R9_CHIRBIL_PRIM.gz	outcome	17156_72_DCLK1_DCAK1.txt.gz	Inverse variance weighted	9	0.285863	0.236408	0.226588
17156_72_DCLK1_DCAK1.txt.gz	finngen_R9_CHIRBIL_PRIM.gz	outcome	17156_72_DCLK1_DCAK1.txt.gz	Simple mode	9	0.0510303	0.49311	0.920124
17156_72_DCLK1_DCAK1.txt.gz	finngen_R9_CHIRBIL_PRIM.gz	outcome	17156_72_DCLK1_DCAK1.txt.gz	Weighted mode	9	0.233202	0.282492	0.433003
17161_1_DDOST_OST48.txt.gz	finngen_R9_CHIRBIL_PRIM.gz	outcome	17161_1_DDOST_OST48.txt.gz	MR Egger	3	1.73293	2.07173	0.556542
17161_1_DDOST_OST48.txt.gz	finngen_R9_CHIRBIL_PRIM.gz	outcome	17161_1_DDOST_OST48.txt.gz	Weighted median	3	0.163602	0.673897	0.808184
17161_1_DDOST_OST48.txt.gz	finngen_R9_CHIRBIL_PRIM.gz	outcome	17161_1_DDOST_OST48.txt.gz	Inverse variance weighted	3	0.28631	0.621854	0.64522
17161_1_DDOST_OST48.txt.gz	finngen_R9_CHIRBIL_PRIM.gz	outcome	17161_1_DDOST_OST48.txt.gz	Simple mode	3	0.13717	0.880898	0.890554
17161_1_DDOST_OST48.txt.gz	finngen_R9_CHIRBIL_PRIM.gz	outcome	17161_1_DDOST_OST48.txt.gz	Weighted mode	3	0.0714033	0.857967	0.941254
17170_15_CALCB_CALCB.txt.gz	finngen_R9_CHIRBIL_PRIM.gz	outcome	17170_15_CALCB_CALCB.txt.gz	MR Egger	18	0.479009	0.417864	0.268515
17170_15_CALCB_CALCB.txt.gz	finngen_R9_CHIRBIL_PRIM.gz	outcome	17170_15_CALCB_CALCB.txt.gz	Weighted median	18	0.137943	0.28641	0.63007
17170_15_CALCB_CALCB.txt.gz	finngen_R9_CHIRBIL_PRIM.gz	outcome	17170_15_CALCB_CALCB.txt.gz	Inverse variance weighted	18	0.149801	0.222216	0.500233
17170_15_CALCB_CALCB.txt.gz	finngen_R9_CHIRBIL_PRIM.gz	outcome	17170_15_CALCB_CALCB.txt.gz	Simple mode	18	-0.354437	0.480765	0.471032
17170_15_CALCB_CALCB.txt.gz	finngen_R9_CHIRBIL_PRIM.gz	outcome	17170_15_CALCB_CALCB.txt.gz	Weighted mode	18	0.21975	0.284907	0.451115
17224_12_OGN_MIME.txt.gz	finngen_R9_CHIRBIL_PRIM.gz	outcome	17224_12_OGN_MIME.txt.gz	MR Egger	63	-0.00282605	0.194219	0.988438
17224_12_OGN_MIME.txt.gz	finngen_R9_CHIRBIL_PRIM.gz	outcome	17224_12_OGN_MIME.txt.gz	Weighted median	63	0.0942293	0.135364	0.486356
17224_12_OGN_MIME.txt.gz	finngen_R9_CHIRBIL_PRIM.gz	outcome	17224_12_OGN_MIME.txt.gz	Inverse variance weighted	63	0.187216	0.0946391	0.047905
17224_12_OGN_MIME.txt.gz	finngen_R9_CHIRBIL_PRIM.gz	outcome	17224_12_OGN_MIME.txt.gz	Simple mode	63	0.226019	0.267087	0.400676
17224_12_OGN_MIME.txt.gz	finngen_R9_CHIRBIL_PRIM.gz	outcome	17224_12_OGN_MIME.txt.gz	Weighted mode	63	0.00999785	0.137562	0.942295
17377_1_AKR1C3_Aldose_reductase_like_C3.txt.gz	finngen_R9_CHIRBIL_PRIM.gz	outcome	17377_1_AKR1C3_Aldose_reductase_like_C3.txt.gz	MR Egger	31	-0.195444	0.402988	0.631329
17377_1_AKR1C3_Aldose_reductase_like_C3.txt.gz	finngen_R9_CHIRBIL_PRIM.gz	outcome	17377_1_AKR1C3_Aldose_reductase_like_C3.txt.gz	Weighted median	31	-0.156243	0.278948	0.5754
17377_1_AKR1C3_Aldose_reductase_like_C3.txt.gz	finngen_R9_CHIRBIL_PRIM.gz	outcome	17377_1_AKR1C3_Aldose_reductase_like_C3.txt.gz	Inverse variance weighted	31	-0.0904652	0.19509	0.642855
17377_1_AKR1C3_Aldose_reductase_like_C3.txt.gz	finngen_R9_CHIRBIL_PRIM.gz	outcome	17377_1_AKR1C3_Aldose_reductase_like_C3.txt.gz	Simple mode	31	-0.354279	0.580466	0.546235
17377_1_AKR1C3_Aldose_reductase_like_C3.txt.gz	finngen_R9_CHIRBIL_PRIM.gz	outcome	17377_1_AKR1C3_Aldose_reductase_like_C3.txt.gz	Weighted mode	31	-0.451654	0.522994	0.394663
17396_23_ADH1A_ADH1A.txt.gz	finngen_R9_CHIRBIL_PRIM.gz	outcome	17396_23_ADH1A_ADH1A.txt.gz	MR Egger	4	1.44997	0.953586	0.267755
17396_23_ADH1A_ADH1A.txt.gz	finngen_R9_CHIRBIL_PRIM.gz	outcome	17396_23_ADH1A_ADH1A.txt.gz	Weighted median	4	0.740905	0.649284	0.253824
17396_23_ADH1A_ADH1A.txt.gz	finngen_R9_CHIRBIL_PRIM.gz	outcome	17396_23_ADH1A_ADH1A.txt.gz	Inverse variance weighted	4	0.855793	0.566318	0.13075
17396_23_ADH1A_ADH1A.txt.gz	finngen_R9_CHIRBIL_PRIM.gz	outcome	17396_23_ADH1A_ADH1A.txt.gz	Simple mode	4	0.682251	0.888316	0.498388
17396_23_ADH1A_ADH1A.txt.gz	finngen_R9_CHIRBIL_PRIM.gz	outcome	17396_23_ADH1A_ADH1A.txt.gz	Weighted mode	4	0.657901	0.762439	0.451662
17398_55_HMOX1_HO_1.txt.gz	finngen_R9_CHIRBIL_PRIM.gz	outcome	17398_55_HMOX1_HO_1.txt.gz	MR Egger	9	-1.24115	0.699747	0.119386
17398_55_HMOX1_HO_1.txt.gz	finngen_R9_CHIRBIL_PRIM.gz	outcome	17398_55_HMOX1_HO_1.txt.gz	Weighted median	9	-0.714356	0.468925	0.127661
17398_55_HMOX1_HO_1.txt.gz	finngen_R9_CHIRBIL_PRIM.gz	outcome	17398_55_HMOX1_HO_1.txt.gz	Inverse variance weighted	9	-0.805545	0.379641	0.0338495
17398_55_HMOX1_HO_1.txt.gz	finngen_R9_CHIRBIL_PRIM.gz	outcome	17398_55_HMOX1_HO_1.txt.gz	Simple mode	9	-1.30054	0.664423	0.0860042
17398_55_HMOX1_HO_1.txt.gz	finngen_R9_CHIRBIL_PRIM.gz	outcome	17398_55_HMOX1_HO_1.txt.gz	Weighted mode	9	-0.710599	0.627576	0.290306
17447_52_SFRP4_SFRP4.txt.gz	finngen_R9_CHIRBIL_PRIM.gz	outcome	17447_52_SFRP4_SFRP4.txt.gz	MR Egger	8	-0.531961	0.385471	0.216797
17447_52_SFRP4_SFRP4.txt.gz	finngen_R9_CHIRBIL_PRIM.gz	outcome	17447_52_SFRP4_SFRP4.txt.gz	Weighted median	8	-0.280343	0.264677	0.289513
17447_52_SFRP4_SFRP4.txt.gz	finngen_R9_CHIRBIL_PRIM.gz	outcome	17447_52_SFRP4_SFRP4.txt.gz	Inverse variance weighted	8	-0.360238	0.228201	0.114427
17447_52_SFRP4_SFRP4.txt.gz	finngen_R9_CHIRBIL_PRIM.gz	outcome	17447_52_SFRP4_SFRP4.txt.gz	Simple mode	8	-0.460134	0.41534	0.304535
17447_52_SFRP4_SFRP4.txt.gz	finngen_R9_CHIRBIL_PRIM.gz	outcome	17447_52_SFRP4_SFRP4.txt.gz	Weighted mode	8	-0.350695	0.288011	0.262808
17453_34_CP_Ceruloplasmin.txt.gz	finngen_R9_CHIRBIL_PRIM.gz	outcome	17453_34_CP_Ceruloplasmin.txt.gz	Wald ratio	1	0.957321	1.44759	0.508407
17672_184_GIF_Gastric_intrinsic_factor.txt.gz	finngen_R9_CHIRBIL_PRIM.gz	outcome	17672_184_GIF_Gastric_intrinsic_factor.txt.gz	MR Egger	10	-0.324648	0.438388	0.480135
17672_184_GIF_Gastric_intrinsic_factor.txt.gz	finngen_R9_CHIRBIL_PRIM.gz	outcome	17672_184_GIF_Gastric_intrinsic_factor.txt.gz	Weighted median	10	-0.435846	0.301604	0.148431
17672_184_GIF_Gastric_intrinsic_factor.txt.gz	finngen_R9_CHIRBIL_PRIM.gz	outcome	17672_184_GIF_Gastric_intrinsic_factor.txt.gz	Inverse variance weighted	10	-0.169467	0.31229	0.587364
17672_184_GIF_Gastric_intrinsic_factor.txt.gz	finngen_R9_CHIRBIL_PRIM.gz	outcome	17672_184_GIF_Gastric_intrinsic_factor.txt.gz	Simple mode	10	-0.334809	0.697988	0.642899
17672_184_GIF_Gastric_intrinsic_factor.txt.gz	finngen_R9_CHIRBIL_PRIM.gz	outcome	17672_184_GIF_Gastric_intrinsic_factor.txt.gz	Weighted mode	10	-0.43589	0.311743	0.195541
17677_47_CD160_BY55.txt.gz	finngen_R9_CHIRBIL_PRIM.gz	outcome	17677_47_CD160_BY55.txt.gz	MR Egger	4	1.21586	4.04867	0.79228
17677_47_CD160_BY55.txt.gz	finngen_R9_CHIRBIL_PRIM.gz	outcome	17677_47_CD160_BY55.txt.gz	Weighted median	4	-0.32173	0.44136	0.466031
17677_47_CD160_BY55.txt.gz	finngen_R9_CHIRBIL_PRIM.gz	outcome	17677_47_CD160_BY55.txt.gz	Inverse variance weighted	4	-0.371564	0.51168	0.467738
17677_47_CD160_BY55.txt.gz	finngen_R9_CHIRBIL_PRIM.gz	outcome	17677_47_CD160_BY55.txt.gz	Simple mode	4	-0.236092	0.752623	0.774302
17677_47_CD160_BY55.txt.gz	finngen_R9_CHIRBIL_PRIM.gz	outcome	17677_47_CD160_BY55.txt.gz	Weighted mode	4	-0.281666	0.43069	0.55978
17680_12_EPHB1_EPHB1.txt.gz	finngen_R9_CHIRBIL_PRIM.gz	outcome	17680_12_EPHB1_EPHB1.txt.gz	MR Egger	39	-0.230982	0.267106	0.392745
17680_12_EPHB1_EPHB1.txt.gz	finngen_R9_CHIRBIL_PRIM.gz	outcome	17680_12_EPHB1_EPHB1.txt.gz	Weighted median	39	-0.088534	0.174675	0.612261
17680_12_EPHB1_EPHB1.txt.gz	finngen_R9_CHIRBIL_PRIM.gz	outcome	17680_12_EPHB1_EPHB1.txt.gz	Inverse variance weighted	39	0.0284568	0.123922	0.818375
17680_12_EPHB1_EPHB1.txt.gz	finngen_R9_CHIRBIL_PRIM.gz	outcome	17680_12_EPHB1_EPHB1.txt.gz	Simple mode	39	0.135959	0.312943	0.666417
17680_12_EPHB1_EPHB1.txt.gz	finngen_R9_CHIRBIL_PRIM.gz	outcome	17680_12_EPHB1_EPHB1.txt.gz	Weighted mode	39	-0.0573604	0.169016	0.736194
17682_1_CD46_CD46.txt.gz	finngen_R9_CHIRBIL_PRIM.gz	outcome	17682_1_CD46_CD46.txt.gz	MR Egger	16	-0.835068	0.436657	0.0765048
17682_1_CD46_CD46.txt.gz	finngen_R9_CHIRBIL_PRIM.gz	outcome	17682_1_CD46_CD46.txt.gz	Weighted median	16	-0.384352	0.210446	0.0677945
17682_1_CD46_CD46.txt.gz	finngen_R9_CHIRBIL_PRIM.gz	outcome	17682_1_CD46_CD46.txt.gz	Inverse variance weighted	16	-0.180326	0.154616	0.243499
17682_1_CD46_CD46.txt.gz	finngen_R9_CHIRBIL_PRIM.gz	outcome	17682_1_CD46_CD46.txt.gz	Simple mode	16	-0.413843	0.351645	0.257583
17682_1_CD46_CD46.txt.gz	finngen_R9_CHIRBIL_PRIM.gz	outcome	17682_1_CD46_CD46.txt.gz	Weighted mode	16	-0.378265	0.219641	0.105582
17685_9_APOA4_Apo_A_IV.txt.gz	finngen_R9_CHIRBIL_PRIM.gz	outcome	17685_9_APOA4_Apo_A_IV.txt.gz	MR Egger	6	-1.03095	0.787637	0.260694
17685_9_APOA4_Apo_A_IV.txt.gz	finngen_R9_CHIRBIL_PRIM.gz	outcome	17685_9_APOA4_Apo_A_IV.txt.gz	Weighted median	6	-0.0881565	0.594666	0.882149
17685_9_APOA4_Apo_A_IV.txt.gz	finngen_R9_CHIRBIL_PRIM.gz	outcome	17685_9_APOA4_Apo_A_IV.txt.gz	Inverse variance weighted	6	-0.117796	0.478706	0.805627
17685_9_APOA4_Apo_A_IV.txt.gz	finngen_R9_CHIRBIL_PRIM.gz	outcome	17685_9_APOA4_Apo_A_IV.txt.gz	Simple mode	6	0.396744	1.05201	0.721555
17685_9_APOA4_Apo_A_IV.txt.gz	finngen_R9_CHIRBIL_PRIM.gz	outcome	17685_9_APOA4_Apo_A_IV.txt.gz	Weighted mode	6	0.848968	1.21459	0.515736
17691_1_TPP1_TPP1.txt.gz	finngen_R9_CHIRBIL_PRIM.gz	outcome	17691_1_TPP1_TPP1.txt.gz	MR Egger	12	-0.0419971	0.480012	0.932008
17691_1_TPP1_TPP1.txt.gz	finngen_R9_CHIRBIL_PRIM.gz	outcome	17691_1_TPP1_TPP1.txt.gz	Weighted median	12	-0.293849	0.321522	0.360752
17691_1_TPP1_TPP1.txt.gz	finngen_R9_CHIRBIL_PRIM.gz	outcome	17691_1_TPP1_TPP1.txt.gz	Inverse variance weighted	12	-0.517068	0.249627	0.0383246
17691_1_TPP1_TPP1.txt.gz	finngen_R9_CHIRBIL_PRIM.gz	outcome	17691_1_TPP1_TPP1.txt.gz	Simple mode	12	-0.932395	0.522398	0.101858
17691_1_TPP1_TPP1.txt.gz	finngen_R9_CHIRBIL_PRIM.gz	outcome	17691_1_TPP1_TPP1.txt.gz	Weighted mode	12	-0.383081	0.310946	0.24364
17692_2_BTN3A3_BT3A3.txt.gz	finngen_R9_CHIRBIL_PRIM.gz	outcome	17692_2_BTN3A3_BT3A3.txt.gz	MR Egger	24	0.0518251	0.262845	0.845505
17692_2_BTN3A3_BT3A3.txt.gz	finngen_R9_CHIRBIL_PRIM.gz	outcome	17692_2_BTN3A3_BT3A3.txt.gz	Weighted median	24	-0.0083074	0.149135	0.955578
17692_2_BTN3A3_BT3A3.txt.gz	finngen_R9_CHIRBIL_PRIM.gz	outcome	17692_2_BTN3A3_BT3A3.txt.gz	Inverse variance weighted	24	-0.0838186	0.150951	0.57871
17692_2_BTN3A3_BT3A3.txt.gz	finngen_R9_CHIRBIL_PRIM.gz	outcome	17692_2_BTN3A3_BT3A3.txt.gz	Simple mode	24	-0.188644	0.382911	0.626926
17692_2_BTN3A3_BT3A3.txt.gz	finngen_R9_CHIRBIL_PRIM.gz	outcome	17692_2_BTN3A3_BT3A3.txt.gz	Weighted mode	24	-0.062766	0.147477	0.674356
17702_53_UGT1A1_UGT_1A1.txt.gz	finngen_R9_CHIRBIL_PRIM.gz	outcome	17702_53_UGT1A1_UGT_1A1.txt.gz	MR Egger	17	0.273663	0.450472	0.552604
17702_53_UGT1A1_UGT_1A1.txt.gz	finngen_R9_CHIRBIL_PRIM.gz	outcome	17702_53_UGT1A1_UGT_1A1.txt.gz	Weighted median	17	-0.228331	0.242525	0.346462
17702_53_UGT1A1_UGT_1A1.txt.gz	finngen_R9_CHIRBIL_PRIM.gz	outcome	17702_53_UGT1A1_UGT_1A1.txt.gz	Inverse variance weighted	17	-0.325317	0.190317	0.087387
17702_53_UGT1A1_UGT_1A1.txt.gz	finngen_R9_CHIRBIL_PRIM.gz	outcome	17702_53_UGT1A1_UGT_1A1.txt.gz	Simple mode	17	-0.317136	0.425264	0.466641
17702_53_UGT1A1_UGT_1A1.txt.gz	finngen_R9_CHIRBIL_PRIM.gz	outcome	17702_53_UGT1A1_UGT_1A1.txt.gz	Weighted mode	17	-0.203847	0.253355	0.43285
17722_5_FKBP4_FKBP52_protein.txt.gz	finngen_R9_CHIRBIL_PRIM.gz	outcome	17722_5_FKBP4_FKBP52_protein.txt.gz	Inverse variance weighted	2	-0.0197741	0.942244	0.983257
17786_5_GGPS1_GGPPS.txt.gz	finngen_R9_CHIRBIL_PRIM.gz	outcome	17786_5_GGPS1_GGPPS.txt.gz	Inverse variance weighted	2	-0.656294	0.641991	0.306649
17813_21_BPHL_BPHL.txt.gz	finngen_R9_CHIRBIL_PRIM.gz	outcome	17813_21_BPHL_BPHL.txt.gz	MR Egger	3	0.46069	1.28177	0.780341
17813_21_BPHL_BPHL.txt.gz	finngen_R9_CHIRBIL_PRIM.gz	outcome	17813_21_BPHL_BPHL.txt.gz	Weighted median	3	-0.0565874	0.463	0.902726
17813_21_BPHL_BPHL.txt.gz	finngen_R9_CHIRBIL_PRIM.gz	outcome	17813_21_BPHL_BPHL.txt.gz	Inverse variance weighted	3	-0.064599	0.44072	0.883467
17813_21_BPHL_BPHL.txt.gz	finngen_R9_CHIRBIL_PRIM.gz	outcome	17813_21_BPHL_BPHL.txt.gz	Simple mode	3	0.105245	0.559916	0.868247
17813_21_BPHL_BPHL.txt.gz	finngen_R9_CHIRBIL_PRIM.gz	outcome	17813_21_BPHL_BPHL.txt.gz	Weighted mode	3	0.0710542	0.495823	0.899184
17814_8_BPNT1_BPNT1.txt.gz	finngen_R9_CHIRBIL_PRIM.gz	outcome	17814_8_BPNT1_BPNT1.txt.gz	Wald ratio	1	0.412779	1.08088	0.70254
18162_167_IRAK4_IRAK4.txt.gz	finngen_R9_CHIRBIL_PRIM.gz	outcome	18162_167_IRAK4_IRAK4.txt.gz	Wald ratio	1	-0.103429	0.968847	0.914984
18206_18_ADH6_ADH6.txt.gz	finngen_R9_CHIRBIL_PRIM.gz	outcome	18206_18_ADH6_ADH6.txt.gz	MR Egger	15	0.321989	0.451647	0.488494
18206_18_ADH6_ADH6.txt.gz	finngen_R9_CHIRBIL_PRIM.gz	outcome	18206_18_ADH6_ADH6.txt.gz	Weighted median	15	0.320322	0.311377	0.303609
18206_18_ADH6_ADH6.txt.gz	finngen_R9_CHIRBIL_PRIM.gz	outcome	18206_18_ADH6_ADH6.txt.gz	Inverse variance weighted	15	0.190289	0.227387	0.402677
18206_18_ADH6_ADH6.txt.gz	finngen_R9_CHIRBIL_PRIM.gz	outcome	18206_18_ADH6_ADH6.txt.gz	Simple mode	15	0.342799	0.492031	0.497395
18206_18_ADH6_ADH6.txt.gz	finngen_R9_CHIRBIL_PRIM.gz	outcome	18206_18_ADH6_ADH6.txt.gz	Weighted mode	15	0.390706	0.403565	0.349404
18216_22_IL11RA_IL_11_RA.txt.gz	finngen_R9_CHIRBIL_PRIM.gz	outcome	18216_22_IL11RA_IL_11_RA.txt.gz	MR Egger	22	-0.11332	0.164381	0.498507
18216_22_IL11RA_IL_11_RA.txt.gz	finngen_R9_CHIRBIL_PRIM.gz	outcome	18216_22_IL11RA_IL_11_RA.txt.gz	Weighted median	22	0.079179	0.163588	0.628375
18216_22_IL11RA_IL_11_RA.txt.gz	finngen_R9_CHIRBIL_PRIM.gz	outcome	18216_22_IL11RA_IL_11_RA.txt.gz	Inverse variance weighted	22	0.0442304	0.113243	0.696108
18216_22_IL11RA_IL_11_RA.txt.gz	finngen_R9_CHIRBIL_PRIM.gz	outcome	18216_22_IL11RA_IL_11_RA.txt.gz	Simple mode	22	-0.122469	0.251729	0.631644
18216_22_IL11RA_IL_11_RA.txt.gz	finngen_R9_CHIRBIL_PRIM.gz	outcome	18216_22_IL11RA_IL_11_RA.txt.gz	Weighted mode	22	0.0281214	0.161453	0.863394
18225_13_HEBP1_HEBP1.txt.gz	finngen_R9_CHIRBIL_PRIM.gz	outcome	18225_13_HEBP1_HEBP1.txt.gz	MR Egger	59	0.0461257	0.0992214	0.643791
18225_13_HEBP1_HEBP1.txt.gz	finngen_R9_CHIRBIL_PRIM.gz	outcome	18225_13_HEBP1_HEBP1.txt.gz	Weighted median	59	0.0320421	0.104064	0.758152
18225_13_HEBP1_HEBP1.txt.gz	finngen_R9_CHIRBIL_PRIM.gz	outcome	18225_13_HEBP1_HEBP1.txt.gz	Inverse variance weighted	59	0.0210292	0.0699978	0.763852
18225_13_HEBP1_HEBP1.txt.gz	finngen_R9_CHIRBIL_PRIM.gz	outcome	18225_13_HEBP1_HEBP1.txt.gz	Simple mode	59	-0.261069	0.180049	0.152448
18225_13_HEBP1_HEBP1.txt.gz	finngen_R9_CHIRBIL_PRIM.gz	outcome	18225_13_HEBP1_HEBP1.txt.gz	Weighted mode	59	0.0335187	0.0900243	0.711005
18340_2_PSMB4_Proteasome_beta_chain.txt.gz	finngen_R9_CHIRBIL_PRIM.gz	outcome	18340_2_PSMB4_Proteasome_beta_chain.txt.gz	MR Egger	38	-0.0210844	0.142201	0.882956
18340_2_PSMB4_Proteasome_beta_chain.txt.gz	finngen_R9_CHIRBIL_PRIM.gz	outcome	18340_2_PSMB4_Proteasome_beta_chain.txt.gz	Weighted median	38	-0.103464	0.112384	0.357245
18340_2_PSMB4_Proteasome_beta_chain.txt.gz	finngen_R9_CHIRBIL_PRIM.gz	outcome	18340_2_PSMB4_Proteasome_beta_chain.txt.gz	Inverse variance weighted	38	-0.173204	0.101365	0.0875039
18340_2_PSMB4_Proteasome_beta_chain.txt.gz	finngen_R9_CHIRBIL_PRIM.gz	outcome	18340_2_PSMB4_Proteasome_beta_chain.txt.gz	Simple mode	38	-0.205553	0.328777	0.535674
18340_2_PSMB4_Proteasome_beta_chain.txt.gz	finngen_R9_CHIRBIL_PRIM.gz	outcome	18340_2_PSMB4_Proteasome_beta_chain.txt.gz	Weighted mode	38	-0.139431	0.10447	0.190148
18381_16_ALDH2_ALDH_E2.txt.gz	finngen_R9_CHIRBIL_PRIM.gz	outcome	18381_16_ALDH2_ALDH_E2.txt.gz	MR Egger	6	1.21458	0.922406	0.258296
18381_16_ALDH2_ALDH_E2.txt.gz	finngen_R9_CHIRBIL_PRIM.gz	outcome	18381_16_ALDH2_ALDH_E2.txt.gz	Weighted median	6	0.829989	0.515113	0.10712
18381_16_ALDH2_ALDH_E2.txt.gz	finngen_R9_CHIRBIL_PRIM.gz	outcome	18381_16_ALDH2_ALDH_E2.txt.gz	Inverse variance weighted	6	1.04337	0.407899	0.0105304
18381_16_ALDH2_ALDH_E2.txt.gz	finngen_R9_CHIRBIL_PRIM.gz	outcome	18381_16_ALDH2_ALDH_E2.txt.gz	Simple mode	6	0.821554	0.726922	0.309682
18381_16_ALDH2_ALDH_E2.txt.gz	finngen_R9_CHIRBIL_PRIM.gz	outcome	18381_16_ALDH2_ALDH_E2.txt.gz	Weighted mode	6	0.821554	0.636465	0.25323
18382_109_COMT_Catechol_O_methyltransferase.txt.gz	finngen_R9_CHIRBIL_PRIM.gz	outcome	18382_109_COMT_Catechol_O_methyltransferase.txt.gz	Wald ratio	1	0.60577	0.737715	0.411565
18422_41_MVD_ERG19.txt.gz	finngen_R9_CHIRBIL_PRIM.gz	outcome	18422_41_MVD_ERG19.txt.gz	Inverse variance weighted	2	-1.29409	1.76261	0.462831
18819_21_PPIC_PPIC.txt.gz	finngen_R9_CHIRBIL_PRIM.gz	outcome	18819_21_PPIC_PPIC.txt.gz	MR Egger	80	0.324457	0.163117	0.0501959
18819_21_PPIC_PPIC.txt.gz	finngen_R9_CHIRBIL_PRIM.gz	outcome	18819_21_PPIC_PPIC.txt.gz	Weighted median	80	0.0467667	0.117213	0.689902
18819_21_PPIC_PPIC.txt.gz	finngen_R9_CHIRBIL_PRIM.gz	outcome	18819_21_PPIC_PPIC.txt.gz	Inverse variance weighted	80	0.10472	0.0803432	0.192436
18819_21_PPIC_PPIC.txt.gz	finngen_R9_CHIRBIL_PRIM.gz	outcome	18819_21_PPIC_PPIC.txt.gz	Simple mode	80	0.101414	0.194418	0.603389
18819_21_PPIC_PPIC.txt.gz	finngen_R9_CHIRBIL_PRIM.gz	outcome	18819_21_PPIC_PPIC.txt.gz	Weighted mode	80	0.0664135	0.118612	0.577117
18830_1_ITLN1_Omentin.txt.gz	finngen_R9_CHIRBIL_PRIM.gz	outcome	18830_1_ITLN1_Omentin.txt.gz	MR Egger	9	0.409917	0.71352	0.583613
18830_1_ITLN1_Omentin.txt.gz	finngen_R9_CHIRBIL_PRIM.gz	outcome	18830_1_ITLN1_Omentin.txt.gz	Weighted median	9	-0.0226465	0.513761	0.964841
18830_1_ITLN1_Omentin.txt.gz	finngen_R9_CHIRBIL_PRIM.gz	outcome	18830_1_ITLN1_Omentin.txt.gz	Inverse variance weighted	9	-0.365239	0.382931	0.340185
18830_1_ITLN1_Omentin.txt.gz	finngen_R9_CHIRBIL_PRIM.gz	outcome	18830_1_ITLN1_Omentin.txt.gz	Simple mode	9	0.210226	0.840009	0.808688
18830_1_ITLN1_Omentin.txt.gz	finngen_R9_CHIRBIL_PRIM.gz	outcome	18830_1_ITLN1_Omentin.txt.gz	Weighted mode	9	0.193737	0.684967	0.784479
18832_65_SAA2_SAA2.txt.gz	finngen_R9_CHIRBIL_PRIM.gz	outcome	18832_65_SAA2_SAA2.txt.gz	MR Egger	45	-0.149997	0.14524	0.307493
18832_65_SAA2_SAA2.txt.gz	finngen_R9_CHIRBIL_PRIM.gz	outcome	18832_65_SAA2_SAA2.txt.gz	Weighted median	45	-0.0473856	0.142956	0.74029
18832_65_SAA2_SAA2.txt.gz	finngen_R9_CHIRBIL_PRIM.gz	outcome	18832_65_SAA2_SAA2.txt.gz	Inverse variance weighted	45	-0.0643059	0.0962926	0.50425
18832_65_SAA2_SAA2.txt.gz	finngen_R9_CHIRBIL_PRIM.gz	outcome	18832_65_SAA2_SAA2.txt.gz	Simple mode	45	-0.0746594	0.248514	0.765269
18832_65_SAA2_SAA2.txt.gz	finngen_R9_CHIRBIL_PRIM.gz	outcome	18832_65_SAA2_SAA2.txt.gz	Weighted mode	45	-0.110806	0.130765	0.401378
18839_24_TG_Thyroglobulin.txt.gz	finngen_R9_CHIRBIL_PRIM.gz	outcome	18839_24_TG_Thyroglobulin.txt.gz	Wald ratio	1	-2.17112	1.24981	0.0823582
18841_1_SERPINB13_SPB13.txt.gz	finngen_R9_CHIRBIL_PRIM.gz	outcome	18841_1_SERPINB13_SPB13.txt.gz	MR Egger	15	-0.483283	0.488666	0.340723
18841_1_SERPINB13_SPB13.txt.gz	finngen_R9_CHIRBIL_PRIM.gz	outcome	18841_1_SERPINB13_SPB13.txt.gz	Weighted median	15	-0.171249	0.339774	0.614254
18841_1_SERPINB13_SPB13.txt.gz	finngen_R9_CHIRBIL_PRIM.gz	outcome	18841_1_SERPINB13_SPB13.txt.gz	Inverse variance weighted	15	-0.143311	0.242853	0.555113
18841_1_SERPINB13_SPB13.txt.gz	finngen_R9_CHIRBIL_PRIM.gz	outcome	18841_1_SERPINB13_SPB13.txt.gz	Simple mode	15	-0.000790572	0.472699	0.998689
18841_1_SERPINB13_SPB13.txt.gz	finngen_R9_CHIRBIL_PRIM.gz	outcome	18841_1_SERPINB13_SPB13.txt.gz	Weighted mode	15	-0.000790572	0.393225	0.998424
18864_7_PRSS3_TRY3.txt.gz	finngen_R9_CHIRBIL_PRIM.gz	outcome	18864_7_PRSS3_TRY3.txt.gz	MR Egger	52	0.0067789	0.164389	0.967271
18864_7_PRSS3_TRY3.txt.gz	finngen_R9_CHIRBIL_PRIM.gz	outcome	18864_7_PRSS3_TRY3.txt.gz	Weighted median	52	-6.08237e-05	0.105883	0.999542
18864_7_PRSS3_TRY3.txt.gz	finngen_R9_CHIRBIL_PRIM.gz	outcome	18864_7_PRSS3_TRY3.txt.gz	Inverse variance weighted	52	-0.017017	0.0901254	0.850238
18864_7_PRSS3_TRY3.txt.gz	finngen_R9_CHIRBIL_PRIM.gz	outcome	18864_7_PRSS3_TRY3.txt.gz	Simple mode	52	-0.296006	0.227958	0.199954
18864_7_PRSS3_TRY3.txt.gz	finngen_R9_CHIRBIL_PRIM.gz	outcome	18864_7_PRSS3_TRY3.txt.gz	Weighted mode	52	-0.0165861	0.103928	0.873833
18873_8_CEACAM8_CEAM8.txt.gz	finngen_R9_CHIRBIL_PRIM.gz	outcome	18873_8_CEACAM8_CEAM8.txt.gz	MR Egger	4	-2.38251	3.72189	0.587634
18873_8_CEACAM8_CEAM8.txt.gz	finngen_R9_CHIRBIL_PRIM.gz	outcome	18873_8_CEACAM8_CEAM8.txt.gz	Weighted median	4	-0.107844	0.738256	0.883859
18873_8_CEACAM8_CEAM8.txt.gz	finngen_R9_CHIRBIL_PRIM.gz	outcome	18873_8_CEACAM8_CEAM8.txt.gz	Inverse variance weighted	4	0.113047	0.920527	0.90226
18873_8_CEACAM8_CEAM8.txt.gz	finngen_R9_CHIRBIL_PRIM.gz	outcome	18873_8_CEACAM8_CEAM8.txt.gz	Simple mode	4	1.82428	1.58623	0.333476
18873_8_CEACAM8_CEAM8.txt.gz	finngen_R9_CHIRBIL_PRIM.gz	outcome	18873_8_CEACAM8_CEAM8.txt.gz	Weighted mode	4	-0.900837	0.875632	0.37927
18875_125_COL2A1_Chondrocalcin.txt.gz	finngen_R9_CHIRBIL_PRIM.gz	outcome	18875_125_COL2A1_Chondrocalcin.txt.gz	MR Egger	107	0.0248866	0.105631	0.814203
18875_125_COL2A1_Chondrocalcin.txt.gz	finngen_R9_CHIRBIL_PRIM.gz	outcome	18875_125_COL2A1_Chondrocalcin.txt.gz	Weighted median	107	-0.0356851	0.0887282	0.687548
18875_125_COL2A1_Chondrocalcin.txt.gz	finngen_R9_CHIRBIL_PRIM.gz	outcome	18875_125_COL2A1_Chondrocalcin.txt.gz	Inverse variance weighted	107	-0.0226938	0.0650786	0.727305
18875_125_COL2A1_Chondrocalcin.txt.gz	finngen_R9_CHIRBIL_PRIM.gz	outcome	18875_125_COL2A1_Chondrocalcin.txt.gz	Simple mode	107	0.0149862	0.190747	0.937526
18875_125_COL2A1_Chondrocalcin.txt.gz	finngen_R9_CHIRBIL_PRIM.gz	outcome	18875_125_COL2A1_Chondrocalcin.txt.gz	Weighted mode	107	0.0500143	0.0856302	0.560412
18876_77_CHST4_CHST4.txt.gz	finngen_R9_CHIRBIL_PRIM.gz	outcome	18876_77_CHST4_CHST4.txt.gz	Inverse variance weighted	2	-0.722298	0.648955	0.265701
18878_15_GREM1_GREM1.txt.gz	finngen_R9_CHIRBIL_PRIM.gz	outcome	18878_15_GREM1_GREM1.txt.gz	MR Egger	78	-0.104645	0.103726	0.316246
18878_15_GREM1_GREM1.txt.gz	finngen_R9_CHIRBIL_PRIM.gz	outcome	18878_15_GREM1_GREM1.txt.gz	Weighted median	78	-0.0417663	0.0988484	0.672639
18878_15_GREM1_GREM1.txt.gz	finngen_R9_CHIRBIL_PRIM.gz	outcome	18878_15_GREM1_GREM1.txt.gz	Inverse variance weighted	78	-0.101336	0.0626198	0.105603
18878_15_GREM1_GREM1.txt.gz	finngen_R9_CHIRBIL_PRIM.gz	outcome	18878_15_GREM1_GREM1.txt.gz	Simple mode	78	-0.0844003	0.174524	0.630041
18878_15_GREM1_GREM1.txt.gz	finngen_R9_CHIRBIL_PRIM.gz	outcome	18878_15_GREM1_GREM1.txt.gz	Weighted mode	78	-0.0844003	0.0984479	0.393935
18880_81_COL3A1_Collagen_Type_III.txt.gz	finngen_R9_CHIRBIL_PRIM.gz	outcome	18880_81_COL3A1_Collagen_Type_III.txt.gz	MR Egger	3	-3.79516	3.65907	0.488379
18880_81_COL3A1_Collagen_Type_III.txt.gz	finngen_R9_CHIRBIL_PRIM.gz	outcome	18880_81_COL3A1_Collagen_Type_III.txt.gz	Weighted median	3	-1.07552	0.836587	0.198583
18880_81_COL3A1_Collagen_Type_III.txt.gz	finngen_R9_CHIRBIL_PRIM.gz	outcome	18880_81_COL3A1_Collagen_Type_III.txt.gz	Inverse variance weighted	3	-1.09284	0.749619	0.144878
18880_81_COL3A1_Collagen_Type_III.txt.gz	finngen_R9_CHIRBIL_PRIM.gz	outcome	18880_81_COL3A1_Collagen_Type_III.txt.gz	Simple mode	3	-1.3042	1.13164	0.368272
18880_81_COL3A1_Collagen_Type_III.txt.gz	finngen_R9_CHIRBIL_PRIM.gz	outcome	18880_81_COL3A1_Collagen_Type_III.txt.gz	Weighted mode	3	-1.12891	0.89672	0.335088
18881_7_CD97_CD97.txt.gz	finngen_R9_CHIRBIL_PRIM.gz	outcome	18881_7_CD97_CD97.txt.gz	MR Egger	11	0.76006	0.424609	0.107067
18881_7_CD97_CD97.txt.gz	finngen_R9_CHIRBIL_PRIM.gz	outcome	18881_7_CD97_CD97.txt.gz	Weighted median	11	0.691038	0.346598	0.0461767
18881_7_CD97_CD97.txt.gz	finngen_R9_CHIRBIL_PRIM.gz	outcome	18881_7_CD97_CD97.txt.gz	Inverse variance weighted	11	0.380339	0.257239	0.139262
18881_7_CD97_CD97.txt.gz	finngen_R9_CHIRBIL_PRIM.gz	outcome	18881_7_CD97_CD97.txt.gz	Simple mode	11	0.804547	0.616532	0.221137
18881_7_CD97_CD97.txt.gz	finngen_R9_CHIRBIL_PRIM.gz	outcome	18881_7_CD97_CD97.txt.gz	Weighted mode	11	0.761067	0.526464	0.178884
18893_26_GPR56_GPR56.txt.gz	finngen_R9_CHIRBIL_PRIM.gz	outcome	18893_26_GPR56_GPR56.txt.gz	Wald ratio	1	0.89433	1.00793	0.374921
18895_54_GSTM4_GSTM4.txt.gz	finngen_R9_CHIRBIL_PRIM.gz	outcome	18895_54_GSTM4_GSTM4.txt.gz	MR Egger	128	0.0281945	0.0691777	0.684283
18895_54_GSTM4_GSTM4.txt.gz	finngen_R9_CHIRBIL_PRIM.gz	outcome	18895_54_GSTM4_GSTM4.txt.gz	Weighted median	128	-0.00241529	0.0733982	0.973749
18895_54_GSTM4_GSTM4.txt.gz	finngen_R9_CHIRBIL_PRIM.gz	outcome	18895_54_GSTM4_GSTM4.txt.gz	Inverse variance weighted	128	-0.0557015	0.0463445	0.229402
18895_54_GSTM4_GSTM4.txt.gz	finngen_R9_CHIRBIL_PRIM.gz	outcome	18895_54_GSTM4_GSTM4.txt.gz	Simple mode	128	-0.0484687	0.138224	0.72643
18895_54_GSTM4_GSTM4.txt.gz	finngen_R9_CHIRBIL_PRIM.gz	outcome	18895_54_GSTM4_GSTM4.txt.gz	Weighted mode	128	0.00524573	0.0660434	0.936817
18917_53_AMY2A_Pancreatic_alpha_amylase.txt.gz	finngen_R9_CHIRBIL_PRIM.gz	outcome	18917_53_AMY2A_Pancreatic_alpha_amylase.txt.gz	MR Egger	50	0.320646	0.14108	0.0275555
18917_53_AMY2A_Pancreatic_alpha_amylase.txt.gz	finngen_R9_CHIRBIL_PRIM.gz	outcome	18917_53_AMY2A_Pancreatic_alpha_amylase.txt.gz	Weighted median	50	0.363824	0.129952	0.00511534
18917_53_AMY2A_Pancreatic_alpha_amylase.txt.gz	finngen_R9_CHIRBIL_PRIM.gz	outcome	18917_53_AMY2A_Pancreatic_alpha_amylase.txt.gz	Inverse variance weighted	50	0.339624	0.0887352	0.000129509
18917_53_AMY2A_Pancreatic_alpha_amylase.txt.gz	finngen_R9_CHIRBIL_PRIM.gz	outcome	18917_53_AMY2A_Pancreatic_alpha_amylase.txt.gz	Simple mode	50	0.20877	0.254999	0.416916
18917_53_AMY2A_Pancreatic_alpha_amylase.txt.gz	finngen_R9_CHIRBIL_PRIM.gz	outcome	18917_53_AMY2A_Pancreatic_alpha_amylase.txt.gz	Weighted mode	50	0.268304	0.139876	0.0609284
18918_86_PDE4A_PDE4A.txt.gz	finngen_R9_CHIRBIL_PRIM.gz	outcome	18918_86_PDE4A_PDE4A.txt.gz	MR Egger	6	2.05382	0.872851	0.0782587
18918_86_PDE4A_PDE4A.txt.gz	finngen_R9_CHIRBIL_PRIM.gz	outcome	18918_86_PDE4A_PDE4A.txt.gz	Weighted median	6	0.578328	0.531544	0.276589
18918_86_PDE4A_PDE4A.txt.gz	finngen_R9_CHIRBIL_PRIM.gz	outcome	18918_86_PDE4A_PDE4A.txt.gz	Inverse variance weighted	6	0.753706	0.434374	0.0827133
18918_86_PDE4A_PDE4A.txt.gz	finngen_R9_CHIRBIL_PRIM.gz	outcome	18918_86_PDE4A_PDE4A.txt.gz	Simple mode	6	1.46827	0.904153	0.16532
18918_86_PDE4A_PDE4A.txt.gz	finngen_R9_CHIRBIL_PRIM.gz	outcome	18918_86_PDE4A_PDE4A.txt.gz	Weighted mode	6	0.495367	0.796783	0.56138
18922_27_CD68_CD68.txt.gz	finngen_R9_CHIRBIL_PRIM.gz	outcome	18922_27_CD68_CD68.txt.gz	MR Egger	9	1.09624	0.851666	0.238959
18922_27_CD68_CD68.txt.gz	finngen_R9_CHIRBIL_PRIM.gz	outcome	18922_27_CD68_CD68.txt.gz	Weighted median	9	0.151422	0.462033	0.743116
18922_27_CD68_CD68.txt.gz	finngen_R9_CHIRBIL_PRIM.gz	outcome	18922_27_CD68_CD68.txt.gz	Inverse variance weighted	9	0.109567	0.358404	0.759827
18922_27_CD68_CD68.txt.gz	finngen_R9_CHIRBIL_PRIM.gz	outcome	18922_27_CD68_CD68.txt.gz	Simple mode	9	0.279686	0.706502	0.702546
18922_27_CD68_CD68.txt.gz	finngen_R9_CHIRBIL_PRIM.gz	outcome	18922_27_CD68_CD68.txt.gz	Weighted mode	9	0.323603	0.649773	0.631867
18930_28_SLIT2_SLIT2.txt.gz	finngen_R9_CHIRBIL_PRIM.gz	outcome	18930_28_SLIT2_SLIT2.txt.gz	MR Egger	8	0.496449	1.75186	0.786407
18930_28_SLIT2_SLIT2.txt.gz	finngen_R9_CHIRBIL_PRIM.gz	outcome	18930_28_SLIT2_SLIT2.txt.gz	Weighted median	8	0.222073	0.418214	0.595417
18930_28_SLIT2_SLIT2.txt.gz	finngen_R9_CHIRBIL_PRIM.gz	outcome	18930_28_SLIT2_SLIT2.txt.gz	Inverse variance weighted	8	0.344188	0.316656	0.277062
18930_28_SLIT2_SLIT2.txt.gz	finngen_R9_CHIRBIL_PRIM.gz	outcome	18930_28_SLIT2_SLIT2.txt.gz	Simple mode	8	0.684231	0.79952	0.420433
18930_28_SLIT2_SLIT2.txt.gz	finngen_R9_CHIRBIL_PRIM.gz	outcome	18930_28_SLIT2_SLIT2.txt.gz	Weighted mode	8	-0.389139	0.69814	0.594625
18934_50_TGM2_Tissue_transglutaminase.txt.gz	finngen_R9_CHIRBIL_PRIM.gz	outcome	18934_50_TGM2_Tissue_transglutaminase.txt.gz	MR Egger	5	-0.282779	0.842179	0.759155
18934_50_TGM2_Tissue_transglutaminase.txt.gz	finngen_R9_CHIRBIL_PRIM.gz	outcome	18934_50_TGM2_Tissue_transglutaminase.txt.gz	Weighted median	5	-0.214014	0.452058	0.635913
18934_50_TGM2_Tissue_transglutaminase.txt.gz	finngen_R9_CHIRBIL_PRIM.gz	outcome	18934_50_TGM2_Tissue_transglutaminase.txt.gz	Inverse variance weighted	5	-0.140332	0.396031	0.723079
18934_50_TGM2_Tissue_transglutaminase.txt.gz	finngen_R9_CHIRBIL_PRIM.gz	outcome	18934_50_TGM2_Tissue_transglutaminase.txt.gz	Simple mode	5	-0.281037	0.649818	0.687684
18934_50_TGM2_Tissue_transglutaminase.txt.gz	finngen_R9_CHIRBIL_PRIM.gz	outcome	18934_50_TGM2_Tissue_transglutaminase.txt.gz	Weighted mode	5	-0.195091	0.529546	0.731235
19130_81_SERPINB8_SPB8.txt.gz	finngen_R9_CHIRBIL_PRIM.gz	outcome	19130_81_SERPINB8_SPB8.txt.gz	MR Egger	16	0.545538	0.523734	0.315237
19130_81_SERPINB8_SPB8.txt.gz	finngen_R9_CHIRBIL_PRIM.gz	outcome	19130_81_SERPINB8_SPB8.txt.gz	Weighted median	16	-0.00108634	0.242261	0.996422
19130_81_SERPINB8_SPB8.txt.gz	finngen_R9_CHIRBIL_PRIM.gz	outcome	19130_81_SERPINB8_SPB8.txt.gz	Inverse variance weighted	16	-0.228018	0.200846	0.256255
19130_81_SERPINB8_SPB8.txt.gz	finngen_R9_CHIRBIL_PRIM.gz	outcome	19130_81_SERPINB8_SPB8.txt.gz	Simple mode	16	0.0120626	0.363864	0.973991
19130_81_SERPINB8_SPB8.txt.gz	finngen_R9_CHIRBIL_PRIM.gz	outcome	19130_81_SERPINB8_SPB8.txt.gz	Weighted mode	16	-0.0037689	0.262916	0.988752
19136_22_ALDH6A1_MMSA.txt.gz	finngen_R9_CHIRBIL_PRIM.gz	outcome	19136_22_ALDH6A1_MMSA.txt.gz	MR Egger	6	-4.81173	5.9352	0.46301
19136_22_ALDH6A1_MMSA.txt.gz	finngen_R9_CHIRBIL_PRIM.gz	outcome	19136_22_ALDH6A1_MMSA.txt.gz	Weighted median	6	0.644246	0.561888	0.251558
19136_22_ALDH6A1_MMSA.txt.gz	finngen_R9_CHIRBIL_PRIM.gz	outcome	19136_22_ALDH6A1_MMSA.txt.gz	Inverse variance weighted	6	0.440794	0.503953	0.381752
19136_22_ALDH6A1_MMSA.txt.gz	finngen_R9_CHIRBIL_PRIM.gz	outcome	19136_22_ALDH6A1_MMSA.txt.gz	Simple mode	6	0.978125	0.728809	0.237285
19136_22_ALDH6A1_MMSA.txt.gz	finngen_R9_CHIRBIL_PRIM.gz	outcome	19136_22_ALDH6A1_MMSA.txt.gz	Weighted mode	6	0.733027	0.61705	0.2882
19154_41_SERPINE2_Protease_nexin_I.txt.gz	finngen_R9_CHIRBIL_PRIM.gz	outcome	19154_41_SERPINE2_Protease_nexin_I.txt.gz	MR Egger	78	-0.231395	0.132586	0.084983
19154_41_SERPINE2_Protease_nexin_I.txt.gz	finngen_R9_CHIRBIL_PRIM.gz	outcome	19154_41_SERPINE2_Protease_nexin_I.txt.gz	Weighted median	78	-0.196818	0.115396	0.0880856
19154_41_SERPINE2_Protease_nexin_I.txt.gz	finngen_R9_CHIRBIL_PRIM.gz	outcome	19154_41_SERPINE2_Protease_nexin_I.txt.gz	Inverse variance weighted	78	-0.0941056	0.0793129	0.235421
19154_41_SERPINE2_Protease_nexin_I.txt.gz	finngen_R9_CHIRBIL_PRIM.gz	outcome	19154_41_SERPINE2_Protease_nexin_I.txt.gz	Simple mode	78	0.171149	0.292192	0.559762
19154_41_SERPINE2_Protease_nexin_I.txt.gz	finngen_R9_CHIRBIL_PRIM.gz	outcome	19154_41_SERPINE2_Protease_nexin_I.txt.gz	Weighted mode	78	-0.194244	0.11218	0.0873611
19207_119_ADK_ADK.txt.gz	finngen_R9_CHIRBIL_PRIM.gz	outcome	19207_119_ADK_ADK.txt.gz	Inverse variance weighted	2	-1.11185	0.964331	0.248919
19213_1_SPINK4_ISK4.txt.gz	finngen_R9_CHIRBIL_PRIM.gz	outcome	19213_1_SPINK4_ISK4.txt.gz	MR Egger	10	0.325704	0.392745	0.430981
19213_1_SPINK4_ISK4.txt.gz	finngen_R9_CHIRBIL_PRIM.gz	outcome	19213_1_SPINK4_ISK4.txt.gz	Weighted median	10	0.201461	0.286251	0.481562
19213_1_SPINK4_ISK4.txt.gz	finngen_R9_CHIRBIL_PRIM.gz	outcome	19213_1_SPINK4_ISK4.txt.gz	Inverse variance weighted	10	0.0938948	0.24578	0.702441
19213_1_SPINK4_ISK4.txt.gz	finngen_R9_CHIRBIL_PRIM.gz	outcome	19213_1_SPINK4_ISK4.txt.gz	Simple mode	10	-0.394979	0.573508	0.50837
19213_1_SPINK4_ISK4.txt.gz	finngen_R9_CHIRBIL_PRIM.gz	outcome	19213_1_SPINK4_ISK4.txt.gz	Weighted mode	10	0.180261	0.304607	0.568561
19238_12_GLUL_GLNA.txt.gz	finngen_R9_CHIRBIL_PRIM.gz	outcome	19238_12_GLUL_GLNA.txt.gz	Wald ratio	1	0.587348	1.24291	0.636527
19251_56_SRGN_Platelet_proteoglycan.txt.gz	finngen_R9_CHIRBIL_PRIM.gz	outcome	19251_56_SRGN_Platelet_proteoglycan.txt.gz	MR Egger	20	-0.0436501	0.383814	0.910713
19251_56_SRGN_Platelet_proteoglycan.txt.gz	finngen_R9_CHIRBIL_PRIM.gz	outcome	19251_56_SRGN_Platelet_proteoglycan.txt.gz	Weighted median	20	-0.136675	0.284939	0.631466
19251_56_SRGN_Platelet_proteoglycan.txt.gz	finngen_R9_CHIRBIL_PRIM.gz	outcome	19251_56_SRGN_Platelet_proteoglycan.txt.gz	Inverse variance weighted	20	-0.089342	0.203781	0.66108
19251_56_SRGN_Platelet_proteoglycan.txt.gz	finngen_R9_CHIRBIL_PRIM.gz	outcome	19251_56_SRGN_Platelet_proteoglycan.txt.gz	Simple mode	20	-0.255037	0.441909	0.57063
19251_56_SRGN_Platelet_proteoglycan.txt.gz	finngen_R9_CHIRBIL_PRIM.gz	outcome	19251_56_SRGN_Platelet_proteoglycan.txt.gz	Weighted mode	20	-0.181676	0.346319	0.605935
19267_14_HAGH_GLO2.txt.gz	finngen_R9_CHIRBIL_PRIM.gz	outcome	19267_14_HAGH_GLO2.txt.gz	MR Egger	10	-0.805416	0.525098	0.163613
19267_14_HAGH_GLO2.txt.gz	finngen_R9_CHIRBIL_PRIM.gz	outcome	19267_14_HAGH_GLO2.txt.gz	Weighted median	10	-0.625949	0.316673	0.0480819
19267_14_HAGH_GLO2.txt.gz	finngen_R9_CHIRBIL_PRIM.gz	outcome	19267_14_HAGH_GLO2.txt.gz	Inverse variance weighted	10	-0.944463	0.250737	0.000165386
19267_14_HAGH_GLO2.txt.gz	finngen_R9_CHIRBIL_PRIM.gz	outcome	19267_14_HAGH_GLO2.txt.gz	Simple mode	10	-0.661415	0.582283	0.285341
19267_14_HAGH_GLO2.txt.gz	finngen_R9_CHIRBIL_PRIM.gz	outcome	19267_14_HAGH_GLO2.txt.gz	Weighted mode	10	-0.617906	0.376519	0.135195
19273_3_GSR_Glutathione_reductase.txt.gz	finngen_R9_CHIRBIL_PRIM.gz	outcome	19273_3_GSR_Glutathione_reductase.txt.gz	MR Egger	7	0.122014	1.02405	0.909797
19273_3_GSR_Glutathione_reductase.txt.gz	finngen_R9_CHIRBIL_PRIM.gz	outcome	19273_3_GSR_Glutathione_reductase.txt.gz	Weighted median	7	0.733347	0.498218	0.141037
19273_3_GSR_Glutathione_reductase.txt.gz	finngen_R9_CHIRBIL_PRIM.gz	outcome	19273_3_GSR_Glutathione_reductase.txt.gz	Inverse variance weighted	7	0.624575	0.382105	0.10214
19273_3_GSR_Glutathione_reductase.txt.gz	finngen_R9_CHIRBIL_PRIM.gz	outcome	19273_3_GSR_Glutathione_reductase.txt.gz	Simple mode	7	1.25211	0.708869	0.127769
19273_3_GSR_Glutathione_reductase.txt.gz	finngen_R9_CHIRBIL_PRIM.gz	outcome	19273_3_GSR_Glutathione_reductase.txt.gz	Weighted mode	7	0.848707	0.574034	0.189755
19334_62_TXNDC12_TXD12.txt.gz	finngen_R9_CHIRBIL_PRIM.gz	outcome	19334_62_TXNDC12_TXD12.txt.gz	Inverse variance weighted	2	0.233788	0.836699	0.779924
19347_37_CA12_Carbonic_Anhydrase_XII.txt.gz	finngen_R9_CHIRBIL_PRIM.gz	outcome	19347_37_CA12_Carbonic_Anhydrase_XII.txt.gz	Wald ratio	1	-3.42736	1.34316	0.0107195
19361_78_MATN3_MATN3.txt.gz	finngen_R9_CHIRBIL_PRIM.gz	outcome	19361_78_MATN3_MATN3.txt.gz	MR Egger	138	0.015992	0.0798715	0.841607
19361_78_MATN3_MATN3.txt.gz	finngen_R9_CHIRBIL_PRIM.gz	outcome	19361_78_MATN3_MATN3.txt.gz	Weighted median	138	0.121531	0.0805689	0.131449
19361_78_MATN3_MATN3.txt.gz	finngen_R9_CHIRBIL_PRIM.gz	outcome	19361_78_MATN3_MATN3.txt.gz	Inverse variance weighted	138	0.0630367	0.0494591	0.202478
19361_78_MATN3_MATN3.txt.gz	finngen_R9_CHIRBIL_PRIM.gz	outcome	19361_78_MATN3_MATN3.txt.gz	Simple mode	138	0.0382993	0.159593	0.810704
19361_78_MATN3_MATN3.txt.gz	finngen_R9_CHIRBIL_PRIM.gz	outcome	19361_78_MATN3_MATN3.txt.gz	Weighted mode	138	0.158543	0.0783772	0.045038
19376_74_NNMT_NNMT.txt.gz	finngen_R9_CHIRBIL_PRIM.gz	outcome	19376_74_NNMT_NNMT.txt.gz	Inverse variance weighted	2	0.798432	0.87805	0.363179
19377_14_OLFM2_NOE2.txt.gz	finngen_R9_CHIRBIL_PRIM.gz	outcome	19377_14_OLFM2_NOE2.txt.gz	MR Egger	84	0.231556	0.116213	0.0496412
19377_14_OLFM2_NOE2.txt.gz	finngen_R9_CHIRBIL_PRIM.gz	outcome	19377_14_OLFM2_NOE2.txt.gz	Weighted median	84	0.240289	0.102327	0.0188617
19377_14_OLFM2_NOE2.txt.gz	finngen_R9_CHIRBIL_PRIM.gz	outcome	19377_14_OLFM2_NOE2.txt.gz	Inverse variance weighted	84	0.17366	0.0637696	0.00646438
19377_14_OLFM2_NOE2.txt.gz	finngen_R9_CHIRBIL_PRIM.gz	outcome	19377_14_OLFM2_NOE2.txt.gz	Simple mode	84	0.241494	0.187113	0.200415
19377_14_OLFM2_NOE2.txt.gz	finngen_R9_CHIRBIL_PRIM.gz	outcome	19377_14_OLFM2_NOE2.txt.gz	Weighted mode	84	0.241494	0.0985761	0.0163954
19437_61_VEGFA_L_VEGF165.txt.gz	finngen_R9_CHIRBIL_PRIM.gz	outcome	19437_61_VEGFA_L_VEGF165.txt.gz	MR Egger	86	-0.0307094	0.112907	0.786298
19437_61_VEGFA_L_VEGF165.txt.gz	finngen_R9_CHIRBIL_PRIM.gz	outcome	19437_61_VEGFA_L_VEGF165.txt.gz	Weighted median	86	-0.000799099	0.102612	0.993786
19437_61_VEGFA_L_VEGF165.txt.gz	finngen_R9_CHIRBIL_PRIM.gz	outcome	19437_61_VEGFA_L_VEGF165.txt.gz	Inverse variance weighted	86	-0.110401	0.0665592	0.097177
19437_61_VEGFA_L_VEGF165.txt.gz	finngen_R9_CHIRBIL_PRIM.gz	outcome	19437_61_VEGFA_L_VEGF165.txt.gz	Simple mode	86	-0.163765	0.222352	0.463448
19437_61_VEGFA_L_VEGF165.txt.gz	finngen_R9_CHIRBIL_PRIM.gz	outcome	19437_61_VEGFA_L_VEGF165.txt.gz	Weighted mode	86	-0.00662394	0.103999	0.949365
19448_104_UPP1_UPP1.txt.gz	finngen_R9_CHIRBIL_PRIM.gz	outcome	19448_104_UPP1_UPP1.txt.gz	MR Egger	4	0.830572	1.24957	0.574635
19448_104_UPP1_UPP1.txt.gz	finngen_R9_CHIRBIL_PRIM.gz	outcome	19448_104_UPP1_UPP1.txt.gz	Weighted median	4	0.784266	0.476151	0.0995388
19448_104_UPP1_UPP1.txt.gz	finngen_R9_CHIRBIL_PRIM.gz	outcome	19448_104_UPP1_UPP1.txt.gz	Inverse variance weighted	4	0.910081	0.405652	0.0248643
19448_104_UPP1_UPP1.txt.gz	finngen_R9_CHIRBIL_PRIM.gz	outcome	19448_104_UPP1_UPP1.txt.gz	Simple mode	4	1.0009	0.660907	0.227149
19448_104_UPP1_UPP1.txt.gz	finngen_R9_CHIRBIL_PRIM.gz	outcome	19448_104_UPP1_UPP1.txt.gz	Weighted mode	4	0.681454	0.443401	0.221916
19556_12_CR1_Complement_receptor_type_1.txt.gz	finngen_R9_CHIRBIL_PRIM.gz	outcome	19556_12_CR1_Complement_receptor_type_1.txt.gz	MR Egger	85	0.227796	0.106129	0.0347594
19556_12_CR1_Complement_receptor_type_1.txt.gz	finngen_R9_CHIRBIL_PRIM.gz	outcome	19556_12_CR1_Complement_receptor_type_1.txt.gz	Weighted median	85	0.253735	0.11265	0.0242952
19556_12_CR1_Complement_receptor_type_1.txt.gz	finngen_R9_CHIRBIL_PRIM.gz	outcome	19556_12_CR1_Complement_receptor_type_1.txt.gz	Inverse variance weighted	85	0.218385	0.0698201	0.00176105
19556_12_CR1_Complement_receptor_type_1.txt.gz	finngen_R9_CHIRBIL_PRIM.gz	outcome	19556_12_CR1_Complement_receptor_type_1.txt.gz	Simple mode	85	0.177929	0.226983	0.435311
19556_12_CR1_Complement_receptor_type_1.txt.gz	finngen_R9_CHIRBIL_PRIM.gz	outcome	19556_12_CR1_Complement_receptor_type_1.txt.gz	Weighted mode	85	0.161289	0.110601	0.148489
19581_15_IGFBP5_IGFBP_5.txt.gz	finngen_R9_CHIRBIL_PRIM.gz	outcome	19581_15_IGFBP5_IGFBP_5.txt.gz	Inverse variance weighted	2	1.78397	1.34618	0.1851
19590_46_SFTPD_SP_D.txt.gz	finngen_R9_CHIRBIL_PRIM.gz	outcome	19590_46_SFTPD_SP_D.txt.gz	MR Egger	91	0.0843848	0.113149	0.457764
19590_46_SFTPD_SP_D.txt.gz	finngen_R9_CHIRBIL_PRIM.gz	outcome	19590_46_SFTPD_SP_D.txt.gz	Weighted median	91	0.148644	0.103034	0.149112
19590_46_SFTPD_SP_D.txt.gz	finngen_R9_CHIRBIL_PRIM.gz	outcome	19590_46_SFTPD_SP_D.txt.gz	Inverse variance weighted	91	0.0987527	0.066911	0.139976
19590_46_SFTPD_SP_D.txt.gz	finngen_R9_CHIRBIL_PRIM.gz	outcome	19590_46_SFTPD_SP_D.txt.gz	Simple mode	91	0.152967	0.180315	0.398505
19590_46_SFTPD_SP_D.txt.gz	finngen_R9_CHIRBIL_PRIM.gz	outcome	19590_46_SFTPD_SP_D.txt.gz	Weighted mode	91	0.118587	0.10223	0.249117
19606_28_IHH_ihh.txt.gz	finngen_R9_CHIRBIL_PRIM.gz	outcome	19606_28_IHH_ihh.txt.gz	MR Egger	3	2.15131	2.55229	0.554141
19606_28_IHH_ihh.txt.gz	finngen_R9_CHIRBIL_PRIM.gz	outcome	19606_28_IHH_ihh.txt.gz	Weighted median	3	-0.519367	1.0435	0.618685
19606_28_IHH_ihh.txt.gz	finngen_R9_CHIRBIL_PRIM.gz	outcome	19606_28_IHH_ihh.txt.gz	Inverse variance weighted	3	-0.227265	1.14953	0.843277
19606_28_IHH_ihh.txt.gz	finngen_R9_CHIRBIL_PRIM.gz	outcome	19606_28_IHH_ihh.txt.gz	Simple mode	3	-0.584021	1.5893	0.748511
19606_28_IHH_ihh.txt.gz	finngen_R9_CHIRBIL_PRIM.gz	outcome	19606_28_IHH_ihh.txt.gz	Weighted mode	3	-0.893528	1.29097	0.560409
19614_8_TCN1_Holo_TC_I.txt.gz	finngen_R9_CHIRBIL_PRIM.gz	outcome	19614_8_TCN1_Holo_TC_I.txt.gz	MR Egger	58	-0.281032	0.124764	0.0282273
19614_8_TCN1_Holo_TC_I.txt.gz	finngen_R9_CHIRBIL_PRIM.gz	outcome	19614_8_TCN1_Holo_TC_I.txt.gz	Weighted median	58	-0.174074	0.120237	0.147685
19614_8_TCN1_Holo_TC_I.txt.gz	finngen_R9_CHIRBIL_PRIM.gz	outcome	19614_8_TCN1_Holo_TC_I.txt.gz	Inverse variance weighted	58	-0.146754	0.0799414	0.0663919
19614_8_TCN1_Holo_TC_I.txt.gz	finngen_R9_CHIRBIL_PRIM.gz	outcome	19614_8_TCN1_Holo_TC_I.txt.gz	Simple mode	58	-0.00729444	0.222545	0.973967
19614_8_TCN1_Holo_TC_I.txt.gz	finngen_R9_CHIRBIL_PRIM.gz	outcome	19614_8_TCN1_Holo_TC_I.txt.gz	Weighted mode	58	-0.148822	0.107173	0.170354
19622_7_INHBA_Activin_A.txt.gz	finngen_R9_CHIRBIL_PRIM.gz	outcome	19622_7_INHBA_Activin_A.txt.gz	Wald ratio	1	0.780244	0.723077	0.28056
19631_13_KNG1_Kininostatin.txt.gz	finngen_R9_CHIRBIL_PRIM.gz	outcome	19631_13_KNG1_Kininostatin.txt.gz	MR Egger	20	-0.135349	0.328337	0.685041
19631_13_KNG1_Kininostatin.txt.gz	finngen_R9_CHIRBIL_PRIM.gz	outcome	19631_13_KNG1_Kininostatin.txt.gz	Weighted median	20	0.0847297	0.23838	0.722261
19631_13_KNG1_Kininostatin.txt.gz	finngen_R9_CHIRBIL_PRIM.gz	outcome	19631_13_KNG1_Kininostatin.txt.gz	Inverse variance weighted	20	0.0710206	0.15897	0.655051
19631_13_KNG1_Kininostatin.txt.gz	finngen_R9_CHIRBIL_PRIM.gz	outcome	19631_13_KNG1_Kininostatin.txt.gz	Simple mode	20	-0.0817983	0.38377	0.833485
19631_13_KNG1_Kininostatin.txt.gz	finngen_R9_CHIRBIL_PRIM.gz	outcome	19631_13_KNG1_Kininostatin.txt.gz	Weighted mode	20	0.0401127	0.233496	0.865418
19635_69_FGL2_FGL2.txt.gz	finngen_R9_CHIRBIL_PRIM.gz	outcome	19635_69_FGL2_FGL2.txt.gz	Wald ratio	1	0.087293	1.4236	0.951105
19637_9_CRH_CRH.txt.gz	finngen_R9_CHIRBIL_PRIM.gz	outcome	19637_9_CRH_CRH.txt.gz	Wald ratio	1	0.617829	1.79416	0.730578
2190_55_F11_Coagulation_Factor_XI.txt.gz	finngen_R9_CHIRBIL_PRIM.gz	outcome	2190_55_F11_Coagulation_Factor_XI.txt.gz	MR Egger	39	-0.25348	0.173558	0.152596
2190_55_F11_Coagulation_Factor_XI.txt.gz	finngen_R9_CHIRBIL_PRIM.gz	outcome	2190_55_F11_Coagulation_Factor_XI.txt.gz	Weighted median	39	-0.125739	0.140293	0.370113
2190_55_F11_Coagulation_Factor_XI.txt.gz	finngen_R9_CHIRBIL_PRIM.gz	outcome	2190_55_F11_Coagulation_Factor_XI.txt.gz	Inverse variance weighted	39	-0.0867751	0.0948193	0.360106
2190_55_F11_Coagulation_Factor_XI.txt.gz	finngen_R9_CHIRBIL_PRIM.gz	outcome	2190_55_F11_Coagulation_Factor_XI.txt.gz	Simple mode	39	0.28902	0.221799	0.20039
2190_55_F11_Coagulation_Factor_XI.txt.gz	finngen_R9_CHIRBIL_PRIM.gz	outcome	2190_55_F11_Coagulation_Factor_XI.txt.gz	Weighted mode	39	-0.108091	0.126792	0.399274
2192_63_CCL27_CTACK.txt.gz	finngen_R9_CHIRBIL_PRIM.gz	outcome	2192_63_CCL27_CTACK.txt.gz	Wald ratio	1	-2.33975	1.24249	0.0596851
2201_17_COL18A1_Endostatin.txt.gz	finngen_R9_CHIRBIL_PRIM.gz	outcome	2201_17_COL18A1_Endostatin.txt.gz	MR Egger	23	0.596401	0.370156	0.122061
2201_17_COL18A1_Endostatin.txt.gz	finngen_R9_CHIRBIL_PRIM.gz	outcome	2201_17_COL18A1_Endostatin.txt.gz	Weighted median	23	0.19846	0.268317	0.459513
2201_17_COL18A1_Endostatin.txt.gz	finngen_R9_CHIRBIL_PRIM.gz	outcome	2201_17_COL18A1_Endostatin.txt.gz	Inverse variance weighted	23	0.193971	0.182836	0.288735
2201_17_COL18A1_Endostatin.txt.gz	finngen_R9_CHIRBIL_PRIM.gz	outcome	2201_17_COL18A1_Endostatin.txt.gz	Simple mode	23	-0.174868	0.505036	0.732445
2201_17_COL18A1_Endostatin.txt.gz	finngen_R9_CHIRBIL_PRIM.gz	outcome	2201_17_COL18A1_Endostatin.txt.gz	Weighted mode	23	0.224823	0.385707	0.565898
2212_69_PLAT_tPA.txt.gz	finngen_R9_CHIRBIL_PRIM.gz	outcome	2212_69_PLAT_tPA.txt.gz	MR Egger	13	-0.338506	0.433751	0.451614
2212_69_PLAT_tPA.txt.gz	finngen_R9_CHIRBIL_PRIM.gz	outcome	2212_69_PLAT_tPA.txt.gz	Weighted median	13	-0.750002	0.352525	0.0333773
2212_69_PLAT_tPA.txt.gz	finngen_R9_CHIRBIL_PRIM.gz	outcome	2212_69_PLAT_tPA.txt.gz	Inverse variance weighted	13	-0.495343	0.257112	0.0540341
2212_69_PLAT_tPA.txt.gz	finngen_R9_CHIRBIL_PRIM.gz	outcome	2212_69_PLAT_tPA.txt.gz	Simple mode	13	-0.825832	0.528003	0.143777
2212_69_PLAT_tPA.txt.gz	finngen_R9_CHIRBIL_PRIM.gz	outcome	2212_69_PLAT_tPA.txt.gz	Weighted mode	13	-0.811948	0.450254	0.0964865
2278_61_TIMP2_TIMP_2.txt.gz	finngen_R9_CHIRBIL_PRIM.gz	outcome	2278_61_TIMP2_TIMP_2.txt.gz	Inverse variance weighted	2	0.366992	0.660036	0.578198
2381_52_C5_C5.txt.gz	finngen_R9_CHIRBIL_PRIM.gz	outcome	2381_52_C5_C5.txt.gz	MR Egger	14	0.320758	0.671347	0.64139
2381_52_C5_C5.txt.gz	finngen_R9_CHIRBIL_PRIM.gz	outcome	2381_52_C5_C5.txt.gz	Weighted median	14	-0.170264	0.348514	0.625165
2381_52_C5_C5.txt.gz	finngen_R9_CHIRBIL_PRIM.gz	outcome	2381_52_C5_C5.txt.gz	Inverse variance weighted	14	-0.212487	0.281093	0.44969
2381_52_C5_C5.txt.gz	finngen_R9_CHIRBIL_PRIM.gz	outcome	2381_52_C5_C5.txt.gz	Simple mode	14	-0.325219	0.569467	0.577676
2381_52_C5_C5.txt.gz	finngen_R9_CHIRBIL_PRIM.gz	outcome	2381_52_C5_C5.txt.gz	Weighted mode	14	-0.325219	0.415385	0.447694
2418_55_APOE_Apo_E.txt.gz	finngen_R9_CHIRBIL_PRIM.gz	outcome	2418_55_APOE_Apo_E.txt.gz	MR Egger	35	-0.256214	0.275416	0.358982
2418_55_APOE_Apo_E.txt.gz	finngen_R9_CHIRBIL_PRIM.gz	outcome	2418_55_APOE_Apo_E.txt.gz	Weighted median	35	-0.307007	0.178719	0.0858301
2418_55_APOE_Apo_E.txt.gz	finngen_R9_CHIRBIL_PRIM.gz	outcome	2418_55_APOE_Apo_E.txt.gz	Inverse variance weighted	35	-0.311742	0.125285	0.0128371
2418_55_APOE_Apo_E.txt.gz	finngen_R9_CHIRBIL_PRIM.gz	outcome	2418_55_APOE_Apo_E.txt.gz	Simple mode	35	0.100678	0.286378	0.727342
2418_55_APOE_Apo_E.txt.gz	finngen_R9_CHIRBIL_PRIM.gz	outcome	2418_55_APOE_Apo_E.txt.gz	Weighted mode	35	-0.22575	0.168502	0.189215
2421_7_BDNF_BDNF.txt.gz	finngen_R9_CHIRBIL_PRIM.gz	outcome	2421_7_BDNF_BDNF.txt.gz	Inverse variance weighted	2	-0.287186	0.692199	0.678223
2436_49_CXCL16_CXCL16__soluble.txt.gz	finngen_R9_CHIRBIL_PRIM.gz	outcome	2436_49_CXCL16_CXCL16__soluble.txt.gz	MR Egger	27	-0.721426	0.318522	0.0324399
2436_49_CXCL16_CXCL16__soluble.txt.gz	finngen_R9_CHIRBIL_PRIM.gz	outcome	2436_49_CXCL16_CXCL16__soluble.txt.gz	Weighted median	27	-0.492742	0.223439	0.0274354
2436_49_CXCL16_CXCL16__soluble.txt.gz	finngen_R9_CHIRBIL_PRIM.gz	outcome	2436_49_CXCL16_CXCL16__soluble.txt.gz	Inverse variance weighted	27	-0.592393	0.159008	0.000194892
2436_49_CXCL16_CXCL16__soluble.txt.gz	finngen_R9_CHIRBIL_PRIM.gz	outcome	2436_49_CXCL16_CXCL16__soluble.txt.gz	Simple mode	27	-0.791812	0.355453	0.034773
2436_49_CXCL16_CXCL16__soluble.txt.gz	finngen_R9_CHIRBIL_PRIM.gz	outcome	2436_49_CXCL16_CXCL16__soluble.txt.gz	Weighted mode	27	-0.561731	0.241274	0.0279499
2474_54_APCS_SAP.txt.gz	finngen_R9_CHIRBIL_PRIM.gz	outcome	2474_54_APCS_SAP.txt.gz	MR Egger	14	-0.0294324	0.357952	0.935824
2474_54_APCS_SAP.txt.gz	finngen_R9_CHIRBIL_PRIM.gz	outcome	2474_54_APCS_SAP.txt.gz	Weighted median	14	0.116525	0.228851	0.610631
2474_54_APCS_SAP.txt.gz	finngen_R9_CHIRBIL_PRIM.gz	outcome	2474_54_APCS_SAP.txt.gz	Inverse variance weighted	14	0.211047	0.218059	0.333122
2474_54_APCS_SAP.txt.gz	finngen_R9_CHIRBIL_PRIM.gz	outcome	2474_54_APCS_SAP.txt.gz	Simple mode	14	0.456635	0.39335	0.266562
2474_54_APCS_SAP.txt.gz	finngen_R9_CHIRBIL_PRIM.gz	outcome	2474_54_APCS_SAP.txt.gz	Weighted mode	14	0.203774	0.215468	0.361535
2475_1_KIT_SCF_sR.txt.gz	finngen_R9_CHIRBIL_PRIM.gz	outcome	2475_1_KIT_SCF_sR.txt.gz	Wald ratio	1	0.166423	1.32355	0.899937
2480_58_TIMP3_TIMP_3.txt.gz	finngen_R9_CHIRBIL_PRIM.gz	outcome	2480_58_TIMP3_TIMP_3.txt.gz	MR Egger	109	-0.0742071	0.0886815	0.40458
2480_58_TIMP3_TIMP_3.txt.gz	finngen_R9_CHIRBIL_PRIM.gz	outcome	2480_58_TIMP3_TIMP_3.txt.gz	Weighted median	109	-0.0774192	0.0873592	0.375501
2480_58_TIMP3_TIMP_3.txt.gz	finngen_R9_CHIRBIL_PRIM.gz	outcome	2480_58_TIMP3_TIMP_3.txt.gz	Inverse variance weighted	109	-0.0170242	0.0532386	0.749142
2480_58_TIMP3_TIMP_3.txt.gz	finngen_R9_CHIRBIL_PRIM.gz	outcome	2480_58_TIMP3_TIMP_3.txt.gz	Simple mode	109	-0.0692114	0.152901	0.651706
2480_58_TIMP3_TIMP_3.txt.gz	finngen_R9_CHIRBIL_PRIM.gz	outcome	2480_58_TIMP3_TIMP_3.txt.gz	Weighted mode	109	-0.0692114	0.0807681	0.393389
2516_57_CCL21_6Ckine.txt.gz	finngen_R9_CHIRBIL_PRIM.gz	outcome	2516_57_CCL21_6Ckine.txt.gz	MR Egger	7	-2.03716	1.88444	0.32904
2516_57_CCL21_6Ckine.txt.gz	finngen_R9_CHIRBIL_PRIM.gz	outcome	2516_57_CCL21_6Ckine.txt.gz	Weighted median	7	-1.65627	0.442867	0.00018411
2516_57_CCL21_6Ckine.txt.gz	finngen_R9_CHIRBIL_PRIM.gz	outcome	2516_57_CCL21_6Ckine.txt.gz	Inverse variance weighted	7	-1.13526	0.555686	0.0410526
2516_57_CCL21_6Ckine.txt.gz	finngen_R9_CHIRBIL_PRIM.gz	outcome	2516_57_CCL21_6Ckine.txt.gz	Simple mode	7	-1.65737	0.889808	0.111818
2516_57_CCL21_6Ckine.txt.gz	finngen_R9_CHIRBIL_PRIM.gz	outcome	2516_57_CCL21_6Ckine.txt.gz	Weighted mode	7	-1.83897	0.456485	0.00689174
2567_5_CFI_Factor_I.txt.gz	finngen_R9_CHIRBIL_PRIM.gz	outcome	2567_5_CFI_Factor_I.txt.gz	MR Egger	14	0.400281	0.904509	0.66597
2567_5_CFI_Factor_I.txt.gz	finngen_R9_CHIRBIL_PRIM.gz	outcome	2567_5_CFI_Factor_I.txt.gz	Weighted median	14	0.127663	0.33336	0.70175
2567_5_CFI_Factor_I.txt.gz	finngen_R9_CHIRBIL_PRIM.gz	outcome	2567_5_CFI_Factor_I.txt.gz	Inverse variance weighted	14	0.0232238	0.262481	0.929497
2567_5_CFI_Factor_I.txt.gz	finngen_R9_CHIRBIL_PRIM.gz	outcome	2567_5_CFI_Factor_I.txt.gz	Simple mode	14	0.0324666	0.489578	0.948136
2567_5_CFI_Factor_I.txt.gz	finngen_R9_CHIRBIL_PRIM.gz	outcome	2567_5_CFI_Factor_I.txt.gz	Weighted mode	14	0.0834841	0.420777	0.845797
2571_12_IGFBP3_IGFBP_3.txt.gz	finngen_R9_CHIRBIL_PRIM.gz	outcome	2571_12_IGFBP3_IGFBP_3.txt.gz	MR Egger	37	-0.235636	0.176272	0.189922
2571_12_IGFBP3_IGFBP_3.txt.gz	finngen_R9_CHIRBIL_PRIM.gz	outcome	2571_12_IGFBP3_IGFBP_3.txt.gz	Weighted median	37	-0.217376	0.164151	0.185422
2571_12_IGFBP3_IGFBP_3.txt.gz	finngen_R9_CHIRBIL_PRIM.gz	outcome	2571_12_IGFBP3_IGFBP_3.txt.gz	Inverse variance weighted	37	-0.165109	0.122152	0.176481
2571_12_IGFBP3_IGFBP_3.txt.gz	finngen_R9_CHIRBIL_PRIM.gz	outcome	2571_12_IGFBP3_IGFBP_3.txt.gz	Simple mode	37	-0.154357	0.395999	0.698988
2571_12_IGFBP3_IGFBP_3.txt.gz	finngen_R9_CHIRBIL_PRIM.gz	outcome	2571_12_IGFBP3_IGFBP_3.txt.gz	Weighted mode	37	-0.208121	0.162701	0.209023
2579_17_MMP9_MMP_9.txt.gz	finngen_R9_CHIRBIL_PRIM.gz	outcome	2579_17_MMP9_MMP_9.txt.gz	Wald ratio	1	-1.3315	0.690439	0.053795
2580_83_MPO_Myeloperoxidase.txt.gz	finngen_R9_CHIRBIL_PRIM.gz	outcome	2580_83_MPO_Myeloperoxidase.txt.gz	MR Egger	42	0.161079	0.150454	0.290756
2580_83_MPO_Myeloperoxidase.txt.gz	finngen_R9_CHIRBIL_PRIM.gz	outcome	2580_83_MPO_Myeloperoxidase.txt.gz	Weighted median	42	-0.00373233	0.137695	0.978375
2580_83_MPO_Myeloperoxidase.txt.gz	finngen_R9_CHIRBIL_PRIM.gz	outcome	2580_83_MPO_Myeloperoxidase.txt.gz	Inverse variance weighted	42	-0.0584771	0.104528	0.575862
2580_83_MPO_Myeloperoxidase.txt.gz	finngen_R9_CHIRBIL_PRIM.gz	outcome	2580_83_MPO_Myeloperoxidase.txt.gz	Simple mode	42	-0.447865	0.253205	0.0843688
2580_83_MPO_Myeloperoxidase.txt.gz	finngen_R9_CHIRBIL_PRIM.gz	outcome	2580_83_MPO_Myeloperoxidase.txt.gz	Weighted mode	42	0.0504273	0.116573	0.667585
2590_69_ROR1_ROR1.txt.gz	finngen_R9_CHIRBIL_PRIM.gz	outcome	2590_69_ROR1_ROR1.txt.gz	MR Egger	32	0.178786	0.236312	0.455211
2590_69_ROR1_ROR1.txt.gz	finngen_R9_CHIRBIL_PRIM.gz	outcome	2590_69_ROR1_ROR1.txt.gz	Weighted median	32	0.108175	0.167962	0.519547
2590_69_ROR1_ROR1.txt.gz	finngen_R9_CHIRBIL_PRIM.gz	outcome	2590_69_ROR1_ROR1.txt.gz	Inverse variance weighted	32	0.0650545	0.121933	0.593669
2590_69_ROR1_ROR1.txt.gz	finngen_R9_CHIRBIL_PRIM.gz	outcome	2590_69_ROR1_ROR1.txt.gz	Simple mode	32	0.0333861	0.303781	0.913196
2590_69_ROR1_ROR1.txt.gz	finngen_R9_CHIRBIL_PRIM.gz	outcome	2590_69_ROR1_ROR1.txt.gz	Weighted mode	32	0.111705	0.164739	0.502755
2597_8_VEGFA_VEGF.txt.gz	finngen_R9_CHIRBIL_PRIM.gz	outcome	2597_8_VEGFA_VEGF.txt.gz	MR Egger	23	0.170301	0.272301	0.538436
2597_8_VEGFA_VEGF.txt.gz	finngen_R9_CHIRBIL_PRIM.gz	outcome	2597_8_VEGFA_VEGF.txt.gz	Weighted median	23	-0.00642709	0.189547	0.972951
2597_8_VEGFA_VEGF.txt.gz	finngen_R9_CHIRBIL_PRIM.gz	outcome	2597_8_VEGFA_VEGF.txt.gz	Inverse variance weighted	23	-0.203045	0.142778	0.154997
2597_8_VEGFA_VEGF.txt.gz	finngen_R9_CHIRBIL_PRIM.gz	outcome	2597_8_VEGFA_VEGF.txt.gz	Simple mode	23	-0.330199	0.411869	0.431296
2597_8_VEGFA_VEGF.txt.gz	finngen_R9_CHIRBIL_PRIM.gz	outcome	2597_8_VEGFA_VEGF.txt.gz	Weighted mode	23	-0.0251876	0.189106	0.895251
2602_2_ANGPT2_Angiopoietin_2.txt.gz	finngen_R9_CHIRBIL_PRIM.gz	outcome	2602_2_ANGPT2_Angiopoietin_2.txt.gz	MR Egger	7	-1.9832	1.10063	0.131441
2602_2_ANGPT2_Angiopoietin_2.txt.gz	finngen_R9_CHIRBIL_PRIM.gz	outcome	2602_2_ANGPT2_Angiopoietin_2.txt.gz	Weighted median	7	-0.228848	0.443532	0.605877
2602_2_ANGPT2_Angiopoietin_2.txt.gz	finngen_R9_CHIRBIL_PRIM.gz	outcome	2602_2_ANGPT2_Angiopoietin_2.txt.gz	Inverse variance weighted	7	-0.223627	0.471019	0.634948
2602_2_ANGPT2_Angiopoietin_2.txt.gz	finngen_R9_CHIRBIL_PRIM.gz	outcome	2602_2_ANGPT2_Angiopoietin_2.txt.gz	Simple mode	7	0.0827029	0.846544	0.925357
2602_2_ANGPT2_Angiopoietin_2.txt.gz	finngen_R9_CHIRBIL_PRIM.gz	outcome	2602_2_ANGPT2_Angiopoietin_2.txt.gz	Weighted mode	7	-0.216022	0.465358	0.658866
2609_59_CST3_Cystatin_C.txt.gz	finngen_R9_CHIRBIL_PRIM.gz	outcome	2609_59_CST3_Cystatin_C.txt.gz	MR Egger	21	0.53186	0.322111	0.115136
2609_59_CST3_Cystatin_C.txt.gz	finngen_R9_CHIRBIL_PRIM.gz	outcome	2609_59_CST3_Cystatin_C.txt.gz	Weighted median	21	0.375452	0.227011	0.0981491
2609_59_CST3_Cystatin_C.txt.gz	finngen_R9_CHIRBIL_PRIM.gz	outcome	2609_59_CST3_Cystatin_C.txt.gz	Inverse variance weighted	21	0.491793	0.156118	0.00163192
2609_59_CST3_Cystatin_C.txt.gz	finngen_R9_CHIRBIL_PRIM.gz	outcome	2609_59_CST3_Cystatin_C.txt.gz	Simple mode	21	0.388635	0.415879	0.361197
2609_59_CST3_Cystatin_C.txt.gz	finngen_R9_CHIRBIL_PRIM.gz	outcome	2609_59_CST3_Cystatin_C.txt.gz	Weighted mode	21	0.350547	0.236423	0.153738
2611_72_TYRO3_Dtk.txt.gz	finngen_R9_CHIRBIL_PRIM.gz	outcome	2611_72_TYRO3_Dtk.txt.gz	MR Egger	8	-0.275238	0.567031	0.644605
2611_72_TYRO3_Dtk.txt.gz	finngen_R9_CHIRBIL_PRIM.gz	outcome	2611_72_TYRO3_Dtk.txt.gz	Weighted median	8	-0.327124	0.350697	0.350932
2611_72_TYRO3_Dtk.txt.gz	finngen_R9_CHIRBIL_PRIM.gz	outcome	2611_72_TYRO3_Dtk.txt.gz	Inverse variance weighted	8	-0.32862	0.299719	0.272892
2611_72_TYRO3_Dtk.txt.gz	finngen_R9_CHIRBIL_PRIM.gz	outcome	2611_72_TYRO3_Dtk.txt.gz	Simple mode	8	-0.0336478	0.582547	0.955554
2611_72_TYRO3_Dtk.txt.gz	finngen_R9_CHIRBIL_PRIM.gz	outcome	2611_72_TYRO3_Dtk.txt.gz	Weighted mode	8	-0.372594	0.365123	0.341475
2615_60_EFNA5_Ephrin_A5.txt.gz	finngen_R9_CHIRBIL_PRIM.gz	outcome	2615_60_EFNA5_Ephrin_A5.txt.gz	MR Egger	11	-0.474781	1.00483	0.647818
2615_60_EFNA5_Ephrin_A5.txt.gz	finngen_R9_CHIRBIL_PRIM.gz	outcome	2615_60_EFNA5_Ephrin_A5.txt.gz	Weighted median	11	0.0443158	0.434761	0.918811
2615_60_EFNA5_Ephrin_A5.txt.gz	finngen_R9_CHIRBIL_PRIM.gz	outcome	2615_60_EFNA5_Ephrin_A5.txt.gz	Inverse variance weighted	11	-0.0351019	0.338564	0.917424
2615_60_EFNA5_Ephrin_A5.txt.gz	finngen_R9_CHIRBIL_PRIM.gz	outcome	2615_60_EFNA5_Ephrin_A5.txt.gz	Simple mode	11	-0.00431638	0.663209	0.994935
2615_60_EFNA5_Ephrin_A5.txt.gz	finngen_R9_CHIRBIL_PRIM.gz	outcome	2615_60_EFNA5_Ephrin_A5.txt.gz	Weighted mode	11	-0.227825	0.535357	0.679444
2617_56_ERBB3_ERBB3.txt.gz	finngen_R9_CHIRBIL_PRIM.gz	outcome	2617_56_ERBB3_ERBB3.txt.gz	Inverse variance weighted	2	0.842594	0.561347	0.13335
2620_4_IL6ST_gp130__soluble.txt.gz	finngen_R9_CHIRBIL_PRIM.gz	outcome	2620_4_IL6ST_gp130__soluble.txt.gz	MR Egger	30	0.509925	0.251116	0.0518866
2620_4_IL6ST_gp130__soluble.txt.gz	finngen_R9_CHIRBIL_PRIM.gz	outcome	2620_4_IL6ST_gp130__soluble.txt.gz	Weighted median	30	0.364685	0.214918	0.0897233
2620_4_IL6ST_gp130__soluble.txt.gz	finngen_R9_CHIRBIL_PRIM.gz	outcome	2620_4_IL6ST_gp130__soluble.txt.gz	Inverse variance weighted	30	0.341824	0.142962	0.0168018
2620_4_IL6ST_gp130__soluble.txt.gz	finngen_R9_CHIRBIL_PRIM.gz	outcome	2620_4_IL6ST_gp130__soluble.txt.gz	Simple mode	30	0.661086	0.423729	0.12957
2620_4_IL6ST_gp130__soluble.txt.gz	finngen_R9_CHIRBIL_PRIM.gz	outcome	2620_4_IL6ST_gp130__soluble.txt.gz	Weighted mode	30	0.444985	0.227416	0.0600733
2631_50_IL10RB_IL_10_Rb.txt.gz	finngen_R9_CHIRBIL_PRIM.gz	outcome	2631_50_IL10RB_IL_10_Rb.txt.gz	Inverse variance weighted	2	1.0129	0.942604	0.282567
2632_5_IL12RB1_IL_12_Rb1.txt.gz	finngen_R9_CHIRBIL_PRIM.gz	outcome	2632_5_IL12RB1_IL_12_Rb1.txt.gz	Inverse variance weighted	2	0.556003	0.711587	0.434593
2637_77_MRC1_Macrophage_mannose_receptor.txt.gz	finngen_R9_CHIRBIL_PRIM.gz	outcome	2637_77_MRC1_Macrophage_mannose_receptor.txt.gz	MR Egger	100	0.0250762	0.0752054	0.739518
2637_77_MRC1_Macrophage_mannose_receptor.txt.gz	finngen_R9_CHIRBIL_PRIM.gz	outcome	2637_77_MRC1_Macrophage_mannose_receptor.txt.gz	Weighted median	100	0.0634051	0.0739335	0.391115
2637_77_MRC1_Macrophage_mannose_receptor.txt.gz	finngen_R9_CHIRBIL_PRIM.gz	outcome	2637_77_MRC1_Macrophage_mannose_receptor.txt.gz	Inverse variance weighted	100	-0.019479	0.0501643	0.697792
2637_77_MRC1_Macrophage_mannose_receptor.txt.gz	finngen_R9_CHIRBIL_PRIM.gz	outcome	2637_77_MRC1_Macrophage_mannose_receptor.txt.gz	Simple mode	100	0.00858987	0.134329	0.949142
2637_77_MRC1_Macrophage_mannose_receptor.txt.gz	finngen_R9_CHIRBIL_PRIM.gz	outcome	2637_77_MRC1_Macrophage_mannose_receptor.txt.gz	Weighted mode	100	-0.00820422	0.0661881	0.901604
2644_11_PRKCA_PKC_A.txt.gz	finngen_R9_CHIRBIL_PRIM.gz	outcome	2644_11_PRKCA_PKC_A.txt.gz	MR Egger	3	5.51335	2.99645	0.316929
2644_11_PRKCA_PKC_A.txt.gz	finngen_R9_CHIRBIL_PRIM.gz	outcome	2644_11_PRKCA_PKC_A.txt.gz	Weighted median	3	0.636904	0.662825	0.336606
2644_11_PRKCA_PKC_A.txt.gz	finngen_R9_CHIRBIL_PRIM.gz	outcome	2644_11_PRKCA_PKC_A.txt.gz	Inverse variance weighted	3	0.654236	0.905327	0.469894
2644_11_PRKCA_PKC_A.txt.gz	finngen_R9_CHIRBIL_PRIM.gz	outcome	2644_11_PRKCA_PKC_A.txt.gz	Simple mode	3	-0.515162	1.31195	0.732462
2644_11_PRKCA_PKC_A.txt.gz	finngen_R9_CHIRBIL_PRIM.gz	outcome	2644_11_PRKCA_PKC_A.txt.gz	Weighted mode	3	1.45752	0.787439	0.205387
2652_15_PLAUR_suPAR.txt.gz	finngen_R9_CHIRBIL_PRIM.gz	outcome	2652_15_PLAUR_suPAR.txt.gz	MR Egger	17	0.305451	0.414296	0.472329
2652_15_PLAUR_suPAR.txt.gz	finngen_R9_CHIRBIL_PRIM.gz	outcome	2652_15_PLAUR_suPAR.txt.gz	Weighted median	17	0.134895	0.280417	0.630481
2652_15_PLAUR_suPAR.txt.gz	finngen_R9_CHIRBIL_PRIM.gz	outcome	2652_15_PLAUR_suPAR.txt.gz	Inverse variance weighted	17	0.316946	0.203615	0.119566
2652_15_PLAUR_suPAR.txt.gz	finngen_R9_CHIRBIL_PRIM.gz	outcome	2652_15_PLAUR_suPAR.txt.gz	Simple mode	17	0.195286	0.477861	0.688201
2652_15_PLAUR_suPAR.txt.gz	finngen_R9_CHIRBIL_PRIM.gz	outcome	2652_15_PLAUR_suPAR.txt.gz	Weighted mode	17	0.184157	0.333726	0.588696
2654_19_TNFRSF1A_TNF_sR_I.txt.gz	finngen_R9_CHIRBIL_PRIM.gz	outcome	2654_19_TNFRSF1A_TNF_sR_I.txt.gz	MR Egger	3	-0.0335871	1.41149	0.984854
2654_19_TNFRSF1A_TNF_sR_I.txt.gz	finngen_R9_CHIRBIL_PRIM.gz	outcome	2654_19_TNFRSF1A_TNF_sR_I.txt.gz	Weighted median	3	-1.07258	0.573269	0.0613472
2654_19_TNFRSF1A_TNF_sR_I.txt.gz	finngen_R9_CHIRBIL_PRIM.gz	outcome	2654_19_TNFRSF1A_TNF_sR_I.txt.gz	Inverse variance weighted	3	-0.995834	0.757936	0.188888
2654_19_TNFRSF1A_TNF_sR_I.txt.gz	finngen_R9_CHIRBIL_PRIM.gz	outcome	2654_19_TNFRSF1A_TNF_sR_I.txt.gz	Simple mode	3	-0.995426	0.782862	0.331404
2654_19_TNFRSF1A_TNF_sR_I.txt.gz	finngen_R9_CHIRBIL_PRIM.gz	outcome	2654_19_TNFRSF1A_TNF_sR_I.txt.gz	Weighted mode	3	-1.10149	0.597014	0.206335
2658_27_NTRK3_TrkC.txt.gz	finngen_R9_CHIRBIL_PRIM.gz	outcome	2658_27_NTRK3_TrkC.txt.gz	MR Egger	24	-0.0775839	0.369201	0.835493
2658_27_NTRK3_TrkC.txt.gz	finngen_R9_CHIRBIL_PRIM.gz	outcome	2658_27_NTRK3_TrkC.txt.gz	Weighted median	24	-0.00647679	0.239646	0.978439
2658_27_NTRK3_TrkC.txt.gz	finngen_R9_CHIRBIL_PRIM.gz	outcome	2658_27_NTRK3_TrkC.txt.gz	Inverse variance weighted	24	-0.0345501	0.173249	0.84193
2658_27_NTRK3_TrkC.txt.gz	finngen_R9_CHIRBIL_PRIM.gz	outcome	2658_27_NTRK3_TrkC.txt.gz	Simple mode	24	-0.112406	0.366204	0.761643
2658_27_NTRK3_TrkC.txt.gz	finngen_R9_CHIRBIL_PRIM.gz	outcome	2658_27_NTRK3_TrkC.txt.gz	Weighted mode	24	0.000127027	0.278647	0.99964
2665_26_TNFRSF17_BCMA.txt.gz	finngen_R9_CHIRBIL_PRIM.gz	outcome	2665_26_TNFRSF17_BCMA.txt.gz	MR Egger	4	-0.511719	0.987398	0.655918
2665_26_TNFRSF17_BCMA.txt.gz	finngen_R9_CHIRBIL_PRIM.gz	outcome	2665_26_TNFRSF17_BCMA.txt.gz	Weighted median	4	-0.0397868	0.411262	0.92293
2665_26_TNFRSF17_BCMA.txt.gz	finngen_R9_CHIRBIL_PRIM.gz	outcome	2665_26_TNFRSF17_BCMA.txt.gz	Inverse variance weighted	4	-0.0197957	0.373237	0.957702
2665_26_TNFRSF17_BCMA.txt.gz	finngen_R9_CHIRBIL_PRIM.gz	outcome	2665_26_TNFRSF17_BCMA.txt.gz	Simple mode	4	0.39038	0.604885	0.564643
2665_26_TNFRSF17_BCMA.txt.gz	finngen_R9_CHIRBIL_PRIM.gz	outcome	2665_26_TNFRSF17_BCMA.txt.gz	Weighted mode	4	-0.0403676	0.438383	0.932437
2677_1_EGFR_ERBB1.txt.gz	finngen_R9_CHIRBIL_PRIM.gz	outcome	2677_1_EGFR_ERBB1.txt.gz	MR Egger	11	0.545603	0.823942	0.524444
2677_1_EGFR_ERBB1.txt.gz	finngen_R9_CHIRBIL_PRIM.gz	outcome	2677_1_EGFR_ERBB1.txt.gz	Weighted median	11	0.318575	0.355946	0.370781
2677_1_EGFR_ERBB1.txt.gz	finngen_R9_CHIRBIL_PRIM.gz	outcome	2677_1_EGFR_ERBB1.txt.gz	Inverse variance weighted	11	0.306924	0.273424	0.261641
2677_1_EGFR_ERBB1.txt.gz	finngen_R9_CHIRBIL_PRIM.gz	outcome	2677_1_EGFR_ERBB1.txt.gz	Simple mode	11	0.163335	0.54271	0.769608
2677_1_EGFR_ERBB1.txt.gz	finngen_R9_CHIRBIL_PRIM.gz	outcome	2677_1_EGFR_ERBB1.txt.gz	Weighted mode	11	0.231688	0.463072	0.627671
2681_23_HGF_HGF.txt.gz	finngen_R9_CHIRBIL_PRIM.gz	outcome	2681_23_HGF_HGF.txt.gz	Inverse variance weighted	2	1.51595e-05	0.491862	0.999975
2683_1_C3_iC3b.txt.gz	finngen_R9_CHIRBIL_PRIM.gz	outcome	2683_1_C3_iC3b.txt.gz	Wald ratio	1	-0.774083	0.936983	0.408723
2687_2_MIA_MIA.txt.gz	finngen_R9_CHIRBIL_PRIM.gz	outcome	2687_2_MIA_MIA.txt.gz	MR Egger	79	0.0297773	0.0661627	0.65393
2687_2_MIA_MIA.txt.gz	finngen_R9_CHIRBIL_PRIM.gz	outcome	2687_2_MIA_MIA.txt.gz	Weighted median	79	0.0679603	0.0733775	0.354356
2687_2_MIA_MIA.txt.gz	finngen_R9_CHIRBIL_PRIM.gz	outcome	2687_2_MIA_MIA.txt.gz	Inverse variance weighted	79	0.0694408	0.0469411	0.139056
2687_2_MIA_MIA.txt.gz	finngen_R9_CHIRBIL_PRIM.gz	outcome	2687_2_MIA_MIA.txt.gz	Simple mode	79	0.017324	0.120732	0.886272
2687_2_MIA_MIA.txt.gz	finngen_R9_CHIRBIL_PRIM.gz	outcome	2687_2_MIA_MIA.txt.gz	Weighted mode	79	0.0622659	0.0590144	0.294638
2692_74_PLA2G2A_NPS_PLA2.txt.gz	finngen_R9_CHIRBIL_PRIM.gz	outcome	2692_74_PLA2G2A_NPS_PLA2.txt.gz	MR Egger	109	-0.178087	0.105044	0.0929151
2692_74_PLA2G2A_NPS_PLA2.txt.gz	finngen_R9_CHIRBIL_PRIM.gz	outcome	2692_74_PLA2G2A_NPS_PLA2.txt.gz	Weighted median	109	-0.0260504	0.0877967	0.766686
2692_74_PLA2G2A_NPS_PLA2.txt.gz	finngen_R9_CHIRBIL_PRIM.gz	outcome	2692_74_PLA2G2A_NPS_PLA2.txt.gz	Inverse variance weighted	109	-0.10596	0.0577815	0.0666834
2692_74_PLA2G2A_NPS_PLA2.txt.gz	finngen_R9_CHIRBIL_PRIM.gz	outcome	2692_74_PLA2G2A_NPS_PLA2.txt.gz	Simple mode	109	0.000248068	0.177484	0.998887
2692_74_PLA2G2A_NPS_PLA2.txt.gz	finngen_R9_CHIRBIL_PRIM.gz	outcome	2692_74_PLA2G2A_NPS_PLA2.txt.gz	Weighted mode	109	-0.0188577	0.102833	0.854843
2697_7_PF4_PF_4.txt.gz	finngen_R9_CHIRBIL_PRIM.gz	outcome	2697_7_PF4_PF_4.txt.gz	MR Egger	3	-2.23783	3.16482	0.608179
2697_7_PF4_PF_4.txt.gz	finngen_R9_CHIRBIL_PRIM.gz	outcome	2697_7_PF4_PF_4.txt.gz	Weighted median	3	-0.83755	0.5697	0.141518
2697_7_PF4_PF_4.txt.gz	finngen_R9_CHIRBIL_PRIM.gz	outcome	2697_7_PF4_PF_4.txt.gz	Inverse variance weighted	3	-0.744521	0.508615	0.143243
2697_7_PF4_PF_4.txt.gz	finngen_R9_CHIRBIL_PRIM.gz	outcome	2697_7_PF4_PF_4.txt.gz	Simple mode	3	-0.879454	0.654599	0.311251
2697_7_PF4_PF_4.txt.gz	finngen_R9_CHIRBIL_PRIM.gz	outcome	2697_7_PF4_PF_4.txt.gz	Weighted mode	3	-0.879454	0.60479	0.283118
2700_56_PROS1_Protein_S.txt.gz	finngen_R9_CHIRBIL_PRIM.gz	outcome	2700_56_PROS1_Protein_S.txt.gz	Inverse variance weighted	2	-0.403574	0.899728	0.653755
2705_5_CCL25_TECK.txt.gz	finngen_R9_CHIRBIL_PRIM.gz	outcome	2705_5_CCL25_TECK.txt.gz	MR Egger	92	0.0247478	0.0893545	0.782444
2705_5_CCL25_TECK.txt.gz	finngen_R9_CHIRBIL_PRIM.gz	outcome	2705_5_CCL25_TECK.txt.gz	Weighted median	92	0.105292	0.0935626	0.260436
2705_5_CCL25_TECK.txt.gz	finngen_R9_CHIRBIL_PRIM.gz	outcome	2705_5_CCL25_TECK.txt.gz	Inverse variance weighted	92	0.00711151	0.0578448	0.902154
2705_5_CCL25_TECK.txt.gz	finngen_R9_CHIRBIL_PRIM.gz	outcome	2705_5_CCL25_TECK.txt.gz	Simple mode	92	-0.127146	0.172154	0.462075
2705_5_CCL25_TECK.txt.gz	finngen_R9_CHIRBIL_PRIM.gz	outcome	2705_5_CCL25_TECK.txt.gz	Weighted mode	92	0.0558834	0.0899943	0.536175
2731_29_POR_NADPH_P450_Oxidoreductase.txt.gz	finngen_R9_CHIRBIL_PRIM.gz	outcome	2731_29_POR_NADPH_P450_Oxidoreductase.txt.gz	MR Egger	14	-0.112184	0.490844	0.823065
2731_29_POR_NADPH_P450_Oxidoreductase.txt.gz	finngen_R9_CHIRBIL_PRIM.gz	outcome	2731_29_POR_NADPH_P450_Oxidoreductase.txt.gz	Weighted median	14	0.43926	0.303756	0.14815
2731_29_POR_NADPH_P450_Oxidoreductase.txt.gz	finngen_R9_CHIRBIL_PRIM.gz	outcome	2731_29_POR_NADPH_P450_Oxidoreductase.txt.gz	Inverse variance weighted	14	0.332337	0.225132	0.139894
2731_29_POR_NADPH_P450_Oxidoreductase.txt.gz	finngen_R9_CHIRBIL_PRIM.gz	outcome	2731_29_POR_NADPH_P450_Oxidoreductase.txt.gz	Simple mode	14	0.213466	0.505747	0.679864
2731_29_POR_NADPH_P450_Oxidoreductase.txt.gz	finngen_R9_CHIRBIL_PRIM.gz	outcome	2731_29_POR_NADPH_P450_Oxidoreductase.txt.gz	Weighted mode	14	0.457739	0.308511	0.161724
2737_22_NOV_NovH.txt.gz	finngen_R9_CHIRBIL_PRIM.gz	outcome	2737_22_NOV_NovH.txt.gz	Wald ratio	1	-1.88949	1.0145	0.0625347
2741_22_SIGLEC6_Siglec_6.txt.gz	finngen_R9_CHIRBIL_PRIM.gz	outcome	2741_22_SIGLEC6_Siglec_6.txt.gz	MR Egger	130	-0.0842343	0.0796307	0.292134
2741_22_SIGLEC6_Siglec_6.txt.gz	finngen_R9_CHIRBIL_PRIM.gz	outcome	2741_22_SIGLEC6_Siglec_6.txt.gz	Weighted median	130	-0.0258699	0.0883294	0.769613
2741_22_SIGLEC6_Siglec_6.txt.gz	finngen_R9_CHIRBIL_PRIM.gz	outcome	2741_22_SIGLEC6_Siglec_6.txt.gz	Inverse variance weighted	130	-0.0324726	0.0508779	0.523314
2741_22_SIGLEC6_Siglec_6.txt.gz	finngen_R9_CHIRBIL_PRIM.gz	outcome	2741_22_SIGLEC6_Siglec_6.txt.gz	Simple mode	130	-0.122732	0.184339	0.50673
2741_22_SIGLEC6_Siglec_6.txt.gz	finngen_R9_CHIRBIL_PRIM.gz	outcome	2741_22_SIGLEC6_Siglec_6.txt.gz	Weighted mode	130	-0.0699834	0.0773828	0.36748
2742_68_SIGLEC7_Siglec_7.txt.gz	finngen_R9_CHIRBIL_PRIM.gz	outcome	2742_68_SIGLEC7_Siglec_7.txt.gz	MR Egger	25	-0.0594166	0.234389	0.802137
2742_68_SIGLEC7_Siglec_7.txt.gz	finngen_R9_CHIRBIL_PRIM.gz	outcome	2742_68_SIGLEC7_Siglec_7.txt.gz	Weighted median	25	-0.219947	0.182219	0.227413
2742_68_SIGLEC7_Siglec_7.txt.gz	finngen_R9_CHIRBIL_PRIM.gz	outcome	2742_68_SIGLEC7_Siglec_7.txt.gz	Inverse variance weighted	25	-0.117126	0.131367	0.372612
2742_68_SIGLEC7_Siglec_7.txt.gz	finngen_R9_CHIRBIL_PRIM.gz	outcome	2742_68_SIGLEC7_Siglec_7.txt.gz	Simple mode	25	0.151022	0.29064	0.608089
2742_68_SIGLEC7_Siglec_7.txt.gz	finngen_R9_CHIRBIL_PRIM.gz	outcome	2742_68_SIGLEC7_Siglec_7.txt.gz	Weighted mode	25	-0.223658	0.176043	0.216093
2743_5_SHH_Sonic_Hedgehog.txt.gz	finngen_R9_CHIRBIL_PRIM.gz	outcome	2743_5_SHH_Sonic_Hedgehog.txt.gz	MR Egger	6	-0.758434	1.2556	0.578402
2743_5_SHH_Sonic_Hedgehog.txt.gz	finngen_R9_CHIRBIL_PRIM.gz	outcome	2743_5_SHH_Sonic_Hedgehog.txt.gz	Weighted median	6	0.1204	0.469993	0.797817
2743_5_SHH_Sonic_Hedgehog.txt.gz	finngen_R9_CHIRBIL_PRIM.gz	outcome	2743_5_SHH_Sonic_Hedgehog.txt.gz	Inverse variance weighted	6	0.162962	0.385402	0.672415
2743_5_SHH_Sonic_Hedgehog.txt.gz	finngen_R9_CHIRBIL_PRIM.gz	outcome	2743_5_SHH_Sonic_Hedgehog.txt.gz	Simple mode	6	0.0142685	0.651006	0.983361
2743_5_SHH_Sonic_Hedgehog.txt.gz	finngen_R9_CHIRBIL_PRIM.gz	outcome	2743_5_SHH_Sonic_Hedgehog.txt.gz	Weighted mode	6	0.025954	0.532967	0.963046
2750_3_APOA1_Apo_A_I.txt.gz	finngen_R9_CHIRBIL_PRIM.gz	outcome	2750_3_APOA1_Apo_A_I.txt.gz	MR Egger	24	-0.0157709	0.20871	0.940449
2750_3_APOA1_Apo_A_I.txt.gz	finngen_R9_CHIRBIL_PRIM.gz	outcome	2750_3_APOA1_Apo_A_I.txt.gz	Weighted median	24	0.137894	0.198383	0.487
2750_3_APOA1_Apo_A_I.txt.gz	finngen_R9_CHIRBIL_PRIM.gz	outcome	2750_3_APOA1_Apo_A_I.txt.gz	Inverse variance weighted	24	0.0670851	0.136504	0.623108
2750_3_APOA1_Apo_A_I.txt.gz	finngen_R9_CHIRBIL_PRIM.gz	outcome	2750_3_APOA1_Apo_A_I.txt.gz	Simple mode	24	-0.139448	0.323144	0.670097
2750_3_APOA1_Apo_A_I.txt.gz	finngen_R9_CHIRBIL_PRIM.gz	outcome	2750_3_APOA1_Apo_A_I.txt.gz	Weighted mode	24	0.193046	0.207476	0.361802
2754_50_C3_C3.txt.gz	finngen_R9_CHIRBIL_PRIM.gz	outcome	2754_50_C3_C3.txt.gz	Wald ratio	1	-0.655296	0.793198	0.408723
2771_35_IGFBP1_IGFBP_1.txt.gz	finngen_R9_CHIRBIL_PRIM.gz	outcome	2771_35_IGFBP1_IGFBP_1.txt.gz	MR Egger	3	12.5231	22.3426	0.674768
2771_35_IGFBP1_IGFBP_1.txt.gz	finngen_R9_CHIRBIL_PRIM.gz	outcome	2771_35_IGFBP1_IGFBP_1.txt.gz	Weighted median	3	-0.943203	0.685844	0.169056
2771_35_IGFBP1_IGFBP_1.txt.gz	finngen_R9_CHIRBIL_PRIM.gz	outcome	2771_35_IGFBP1_IGFBP_1.txt.gz	Inverse variance weighted	3	-0.989434	0.662166	0.135113
2771_35_IGFBP1_IGFBP_1.txt.gz	finngen_R9_CHIRBIL_PRIM.gz	outcome	2771_35_IGFBP1_IGFBP_1.txt.gz	Simple mode	3	-0.558772	0.94258	0.61341
2771_35_IGFBP1_IGFBP_1.txt.gz	finngen_R9_CHIRBIL_PRIM.gz	outcome	2771_35_IGFBP1_IGFBP_1.txt.gz	Weighted mode	3	-0.854321	0.874192	0.431499
2774_10_IL16_IL_16.txt.gz	finngen_R9_CHIRBIL_PRIM.gz	outcome	2774_10_IL16_IL_16.txt.gz	MR Egger	48	-0.259587	0.177858	0.151218
2774_10_IL16_IL_16.txt.gz	finngen_R9_CHIRBIL_PRIM.gz	outcome	2774_10_IL16_IL_16.txt.gz	Weighted median	48	-0.263251	0.159677	0.0992196
2774_10_IL16_IL_16.txt.gz	finngen_R9_CHIRBIL_PRIM.gz	outcome	2774_10_IL16_IL_16.txt.gz	Inverse variance weighted	48	-0.163916	0.105668	0.120846
2774_10_IL16_IL_16.txt.gz	finngen_R9_CHIRBIL_PRIM.gz	outcome	2774_10_IL16_IL_16.txt.gz	Simple mode	48	-0.416388	0.309848	0.18545
2774_10_IL16_IL_16.txt.gz	finngen_R9_CHIRBIL_PRIM.gz	outcome	2774_10_IL16_IL_16.txt.gz	Weighted mode	48	-0.262979	0.204158	0.204011
2778_10_IL22_IL_22.txt.gz	finngen_R9_CHIRBIL_PRIM.gz	outcome	2778_10_IL22_IL_22.txt.gz	Inverse variance weighted	2	-0.842392	2.06627	0.683504
2780_35_LTF_Lactoferrin.txt.gz	finngen_R9_CHIRBIL_PRIM.gz	outcome	2780_35_LTF_Lactoferrin.txt.gz	MR Egger	15	-0.0519815	0.322322	0.874359
2780_35_LTF_Lactoferrin.txt.gz	finngen_R9_CHIRBIL_PRIM.gz	outcome	2780_35_LTF_Lactoferrin.txt.gz	Weighted median	15	-0.181806	0.270719	0.501859
2780_35_LTF_Lactoferrin.txt.gz	finngen_R9_CHIRBIL_PRIM.gz	outcome	2780_35_LTF_Lactoferrin.txt.gz	Inverse variance weighted	15	-0.0700742	0.195272	0.719704
2780_35_LTF_Lactoferrin.txt.gz	finngen_R9_CHIRBIL_PRIM.gz	outcome	2780_35_LTF_Lactoferrin.txt.gz	Simple mode	15	0.639778	0.481732	0.205399
2780_35_LTF_Lactoferrin.txt.gz	finngen_R9_CHIRBIL_PRIM.gz	outcome	2780_35_LTF_Lactoferrin.txt.gz	Weighted mode	15	-0.351297	0.311333	0.278133
2783_18_CCL3L1_LD78_beta.txt.gz	finngen_R9_CHIRBIL_PRIM.gz	outcome	2783_18_CCL3L1_LD78_beta.txt.gz	Inverse variance weighted	2	0.560536	0.728608	0.441701
2789_26_MMP7_MMP_7.txt.gz	finngen_R9_CHIRBIL_PRIM.gz	outcome	2789_26_MMP7_MMP_7.txt.gz	MR Egger	34	-0.0746667	0.234399	0.752141
2789_26_MMP7_MMP_7.txt.gz	finngen_R9_CHIRBIL_PRIM.gz	outcome	2789_26_MMP7_MMP_7.txt.gz	Weighted median	34	0.0936086	0.167889	0.577143
2789_26_MMP7_MMP_7.txt.gz	finngen_R9_CHIRBIL_PRIM.gz	outcome	2789_26_MMP7_MMP_7.txt.gz	Inverse variance weighted	34	0.0938811	0.122173	0.442234
2789_26_MMP7_MMP_7.txt.gz	finngen_R9_CHIRBIL_PRIM.gz	outcome	2789_26_MMP7_MMP_7.txt.gz	Simple mode	34	0.101747	0.250203	0.686884
2789_26_MMP7_MMP_7.txt.gz	finngen_R9_CHIRBIL_PRIM.gz	outcome	2789_26_MMP7_MMP_7.txt.gz	Weighted mode	34	0.069117	0.170953	0.688598
2797_56_APOB_Apo_B.txt.gz	finngen_R9_CHIRBIL_PRIM.gz	outcome	2797_56_APOB_Apo_B.txt.gz	Wald ratio	1	-0.542523	0.8807	0.537886
2811_27_ANGPT1_Angiopoietin_1.txt.gz	finngen_R9_CHIRBIL_PRIM.gz	outcome	2811_27_ANGPT1_Angiopoietin_1.txt.gz	Wald ratio	1	0.449112	0.918804	0.624983
2813_11_AGRP_ART.txt.gz	finngen_R9_CHIRBIL_PRIM.gz	outcome	2813_11_AGRP_ART.txt.gz	MR Egger	10	0.273727	0.369859	0.480403
2813_11_AGRP_ART.txt.gz	finngen_R9_CHIRBIL_PRIM.gz	outcome	2813_11_AGRP_ART.txt.gz	Weighted median	10	0.172357	0.277349	0.534307
2813_11_AGRP_ART.txt.gz	finngen_R9_CHIRBIL_PRIM.gz	outcome	2813_11_AGRP_ART.txt.gz	Inverse variance weighted	10	0.389135	0.238821	0.103229
2813_11_AGRP_ART.txt.gz	finngen_R9_CHIRBIL_PRIM.gz	outcome	2813_11_AGRP_ART.txt.gz	Simple mode	10	0.860021	0.58514	0.175694
2813_11_AGRP_ART.txt.gz	finngen_R9_CHIRBIL_PRIM.gz	outcome	2813_11_AGRP_ART.txt.gz	Weighted mode	10	0.202683	0.298301	0.513941
2816_50_BCAM_BCAM.txt.gz	finngen_R9_CHIRBIL_PRIM.gz	outcome	2816_50_BCAM_BCAM.txt.gz	MR Egger	34	-0.0414397	0.162981	0.80092
2816_50_BCAM_BCAM.txt.gz	finngen_R9_CHIRBIL_PRIM.gz	outcome	2816_50_BCAM_BCAM.txt.gz	Weighted median	34	0.0949147	0.16952	0.575546
2816_50_BCAM_BCAM.txt.gz	finngen_R9_CHIRBIL_PRIM.gz	outcome	2816_50_BCAM_BCAM.txt.gz	Inverse variance weighted	34	0.148044	0.111925	0.185934
2816_50_BCAM_BCAM.txt.gz	finngen_R9_CHIRBIL_PRIM.gz	outcome	2816_50_BCAM_BCAM.txt.gz	Simple mode	34	0.123953	0.280852	0.661839
2816_50_BCAM_BCAM.txt.gz	finngen_R9_CHIRBIL_PRIM.gz	outcome	2816_50_BCAM_BCAM.txt.gz	Weighted mode	34	0.0755629	0.148734	0.614804
2819_23_CDH5_Cadherin_5.txt.gz	finngen_R9_CHIRBIL_PRIM.gz	outcome	2819_23_CDH5_Cadherin_5.txt.gz	MR Egger	7	-0.0774461	0.967589	0.93931
2819_23_CDH5_Cadherin_5.txt.gz	finngen_R9_CHIRBIL_PRIM.gz	outcome	2819_23_CDH5_Cadherin_5.txt.gz	Weighted median	7	-0.5225	0.365092	0.152388
2819_23_CDH5_Cadherin_5.txt.gz	finngen_R9_CHIRBIL_PRIM.gz	outcome	2819_23_CDH5_Cadherin_5.txt.gz	Inverse variance weighted	7	-0.639704	0.295578	0.0304451
2819_23_CDH5_Cadherin_5.txt.gz	finngen_R9_CHIRBIL_PRIM.gz	outcome	2819_23_CDH5_Cadherin_5.txt.gz	Simple mode	7	-0.476927	0.526823	0.400202
2819_23_CDH5_Cadherin_5.txt.gz	finngen_R9_CHIRBIL_PRIM.gz	outcome	2819_23_CDH5_Cadherin_5.txt.gz	Weighted mode	7	-0.508668	0.375971	0.224827
2827_23_CX3CL1_Fractalkine_CX3CL_1.txt.gz	finngen_R9_CHIRBIL_PRIM.gz	outcome	2827_23_CX3CL1_Fractalkine_CX3CL_1.txt.gz	Inverse variance weighted	2	-0.706077	0.617336	0.252728
2828_82_SPINT1_HAI_1.txt.gz	finngen_R9_CHIRBIL_PRIM.gz	outcome	2828_82_SPINT1_HAI_1.txt.gz	MR Egger	8	-0.453411	0.530506	0.425535
2828_82_SPINT1_HAI_1.txt.gz	finngen_R9_CHIRBIL_PRIM.gz	outcome	2828_82_SPINT1_HAI_1.txt.gz	Weighted median	8	-0.103055	0.430953	0.811003
2828_82_SPINT1_HAI_1.txt.gz	finngen_R9_CHIRBIL_PRIM.gz	outcome	2828_82_SPINT1_HAI_1.txt.gz	Inverse variance weighted	8	0.46174	0.340127	0.174607
2828_82_SPINT1_HAI_1.txt.gz	finngen_R9_CHIRBIL_PRIM.gz	outcome	2828_82_SPINT1_HAI_1.txt.gz	Simple mode	8	0.0769277	0.789852	0.925143
2828_82_SPINT1_HAI_1.txt.gz	finngen_R9_CHIRBIL_PRIM.gz	outcome	2828_82_SPINT1_HAI_1.txt.gz	Weighted mode	8	-0.0933753	0.466836	0.847154
2831_29_KLK11_Kallikrein_11.txt.gz	finngen_R9_CHIRBIL_PRIM.gz	outcome	2831_29_KLK11_Kallikrein_11.txt.gz	MR Egger	73	0.13151	0.151499	0.388287
2831_29_KLK11_Kallikrein_11.txt.gz	finngen_R9_CHIRBIL_PRIM.gz	outcome	2831_29_KLK11_Kallikrein_11.txt.gz	Weighted median	73	0.0804902	0.13671	0.556019
2831_29_KLK11_Kallikrein_11.txt.gz	finngen_R9_CHIRBIL_PRIM.gz	outcome	2831_29_KLK11_Kallikrein_11.txt.gz	Inverse variance weighted	73	-0.0311577	0.0897669	0.728519
2831_29_KLK11_Kallikrein_11.txt.gz	finngen_R9_CHIRBIL_PRIM.gz	outcome	2831_29_KLK11_Kallikrein_11.txt.gz	Simple mode	73	-0.186964	0.256793	0.468929
2831_29_KLK11_Kallikrein_11.txt.gz	finngen_R9_CHIRBIL_PRIM.gz	outcome	2831_29_KLK11_Kallikrein_11.txt.gz	Weighted mode	73	0.0787982	0.137982	0.569725
2834_54_KLK8_kallikrein_8.txt.gz	finngen_R9_CHIRBIL_PRIM.gz	outcome	2834_54_KLK8_kallikrein_8.txt.gz	MR Egger	29	0.0430452	0.211069	0.839931
2834_54_KLK8_kallikrein_8.txt.gz	finngen_R9_CHIRBIL_PRIM.gz	outcome	2834_54_KLK8_kallikrein_8.txt.gz	Weighted median	29	0.00521994	0.207364	0.979917
2834_54_KLK8_kallikrein_8.txt.gz	finngen_R9_CHIRBIL_PRIM.gz	outcome	2834_54_KLK8_kallikrein_8.txt.gz	Inverse variance weighted	29	0.146591	0.147964	0.321823
2834_54_KLK8_kallikrein_8.txt.gz	finngen_R9_CHIRBIL_PRIM.gz	outcome	2834_54_KLK8_kallikrein_8.txt.gz	Simple mode	29	-0.160022	0.405375	0.696018
2834_54_KLK8_kallikrein_8.txt.gz	finngen_R9_CHIRBIL_PRIM.gz	outcome	2834_54_KLK8_kallikrein_8.txt.gz	Weighted mode	29	-0.010155	0.188098	0.957328
2836_68_LCN2_Lipocalin_2.txt.gz	finngen_R9_CHIRBIL_PRIM.gz	outcome	2836_68_LCN2_Lipocalin_2.txt.gz	Inverse variance weighted	2	0.263024	0.715395	0.713125
2837_3_MET_Met.txt.gz	finngen_R9_CHIRBIL_PRIM.gz	outcome	2837_3_MET_Met.txt.gz	MR Egger	16	1.24179	0.85008	0.166151
2837_3_MET_Met.txt.gz	finngen_R9_CHIRBIL_PRIM.gz	outcome	2837_3_MET_Met.txt.gz	Weighted median	16	-0.0467127	0.358519	0.896334
2837_3_MET_Met.txt.gz	finngen_R9_CHIRBIL_PRIM.gz	outcome	2837_3_MET_Met.txt.gz	Inverse variance weighted	16	-0.0541926	0.262497	0.836439
2837_3_MET_Met.txt.gz	finngen_R9_CHIRBIL_PRIM.gz	outcome	2837_3_MET_Met.txt.gz	Simple mode	16	0.159008	0.572314	0.784933
2837_3_MET_Met.txt.gz	finngen_R9_CHIRBIL_PRIM.gz	outcome	2837_3_MET_Met.txt.gz	Weighted mode	16	-0.00861642	0.395974	0.982926
2843_13_SPINT2_SPINT2.txt.gz	finngen_R9_CHIRBIL_PRIM.gz	outcome	2843_13_SPINT2_SPINT2.txt.gz	MR Egger	79	0.0897154	0.09517	0.34879
2843_13_SPINT2_SPINT2.txt.gz	finngen_R9_CHIRBIL_PRIM.gz	outcome	2843_13_SPINT2_SPINT2.txt.gz	Weighted median	79	0.0663731	0.0889301	0.455455
2843_13_SPINT2_SPINT2.txt.gz	finngen_R9_CHIRBIL_PRIM.gz	outcome	2843_13_SPINT2_SPINT2.txt.gz	Inverse variance weighted	79	-0.0196177	0.0600939	0.744084
2843_13_SPINT2_SPINT2.txt.gz	finngen_R9_CHIRBIL_PRIM.gz	outcome	2843_13_SPINT2_SPINT2.txt.gz	Simple mode	79	-0.00582341	0.156718	0.970453
2843_13_SPINT2_SPINT2.txt.gz	finngen_R9_CHIRBIL_PRIM.gz	outcome	2843_13_SPINT2_SPINT2.txt.gz	Weighted mode	79	0.053354	0.0715333	0.457993
2844_53_TIE1_sTie_1.txt.gz	finngen_R9_CHIRBIL_PRIM.gz	outcome	2844_53_TIE1_sTie_1.txt.gz	MR Egger	26	-0.393066	0.346749	0.26817
2844_53_TIE1_sTie_1.txt.gz	finngen_R9_CHIRBIL_PRIM.gz	outcome	2844_53_TIE1_sTie_1.txt.gz	Weighted median	26	-0.217696	0.235015	0.354286
2844_53_TIE1_sTie_1.txt.gz	finngen_R9_CHIRBIL_PRIM.gz	outcome	2844_53_TIE1_sTie_1.txt.gz	Inverse variance weighted	26	-0.271941	0.156819	0.0828983
2844_53_TIE1_sTie_1.txt.gz	finngen_R9_CHIRBIL_PRIM.gz	outcome	2844_53_TIE1_sTie_1.txt.gz	Simple mode	26	-0.620887	0.39766	0.131012
2844_53_TIE1_sTie_1.txt.gz	finngen_R9_CHIRBIL_PRIM.gz	outcome	2844_53_TIE1_sTie_1.txt.gz	Weighted mode	26	-0.336813	0.257005	0.201929
2851_63_C5_C5a.txt.gz	finngen_R9_CHIRBIL_PRIM.gz	outcome	2851_63_C5_C5a.txt.gz	MR Egger	11	0.129848	0.698708	0.856691
2851_63_C5_C5a.txt.gz	finngen_R9_CHIRBIL_PRIM.gz	outcome	2851_63_C5_C5a.txt.gz	Weighted median	11	-0.214904	0.410096	0.600256
2851_63_C5_C5a.txt.gz	finngen_R9_CHIRBIL_PRIM.gz	outcome	2851_63_C5_C5a.txt.gz	Inverse variance weighted	11	-0.0546113	0.302602	0.856782
2851_63_C5_C5a.txt.gz	finngen_R9_CHIRBIL_PRIM.gz	outcome	2851_63_C5_C5a.txt.gz	Simple mode	11	-0.701753	0.665725	0.316632
2851_63_C5_C5a.txt.gz	finngen_R9_CHIRBIL_PRIM.gz	outcome	2851_63_C5_C5a.txt.gz	Weighted mode	11	-0.180651	0.454249	0.699214
2855_49_MAPK3_ERK_1.txt.gz	finngen_R9_CHIRBIL_PRIM.gz	outcome	2855_49_MAPK3_ERK_1.txt.gz	MR Egger	17	0.574148	0.826943	0.498106
2855_49_MAPK3_ERK_1.txt.gz	finngen_R9_CHIRBIL_PRIM.gz	outcome	2855_49_MAPK3_ERK_1.txt.gz	Weighted median	17	-0.495353	0.349883	0.156844
2855_49_MAPK3_ERK_1.txt.gz	finngen_R9_CHIRBIL_PRIM.gz	outcome	2855_49_MAPK3_ERK_1.txt.gz	Inverse variance weighted	17	-0.392167	0.247655	0.113303
2855_49_MAPK3_ERK_1.txt.gz	finngen_R9_CHIRBIL_PRIM.gz	outcome	2855_49_MAPK3_ERK_1.txt.gz	Simple mode	17	-0.880007	0.618409	0.173937
2855_49_MAPK3_ERK_1.txt.gz	finngen_R9_CHIRBIL_PRIM.gz	outcome	2855_49_MAPK3_ERK_1.txt.gz	Weighted mode	17	-0.726822	0.478789	0.148514
2864_2_MAP2K1_MEK1.txt.gz	finngen_R9_CHIRBIL_PRIM.gz	outcome	2864_2_MAP2K1_MEK1.txt.gz	Inverse variance weighted	2	-0.173438	1.32766	0.896065
2879_9_SERPINA3_a1_Antichymotrypsin.txt.gz	finngen_R9_CHIRBIL_PRIM.gz	outcome	2879_9_SERPINA3_a1_Antichymotrypsin.txt.gz	MR Egger	21	0.355327	0.363742	0.340911
2879_9_SERPINA3_a1_Antichymotrypsin.txt.gz	finngen_R9_CHIRBIL_PRIM.gz	outcome	2879_9_SERPINA3_a1_Antichymotrypsin.txt.gz	Weighted median	21	0.346053	0.287598	0.228879
2879_9_SERPINA3_a1_Antichymotrypsin.txt.gz	finngen_R9_CHIRBIL_PRIM.gz	outcome	2879_9_SERPINA3_a1_Antichymotrypsin.txt.gz	Inverse variance weighted	21	0.0900636	0.193827	0.642176
2879_9_SERPINA3_a1_Antichymotrypsin.txt.gz	finngen_R9_CHIRBIL_PRIM.gz	outcome	2879_9_SERPINA3_a1_Antichymotrypsin.txt.gz	Simple mode	21	-0.0394087	0.502578	0.938279
2879_9_SERPINA3_a1_Antichymotrypsin.txt.gz	finngen_R9_CHIRBIL_PRIM.gz	outcome	2879_9_SERPINA3_a1_Antichymotrypsin.txt.gz	Weighted mode	21	0.274884	0.321531	0.40272
2888_49_C7_C7.txt.gz	finngen_R9_CHIRBIL_PRIM.gz	outcome	2888_49_C7_C7.txt.gz	MR Egger	60	0.373874	0.186156	0.0492659
2888_49_C7_C7.txt.gz	finngen_R9_CHIRBIL_PRIM.gz	outcome	2888_49_C7_C7.txt.gz	Weighted median	60	0.0938585	0.127427	0.461385
2888_49_C7_C7.txt.gz	finngen_R9_CHIRBIL_PRIM.gz	outcome	2888_49_C7_C7.txt.gz	Inverse variance weighted	60	-0.021184	0.0868687	0.807338
2888_49_C7_C7.txt.gz	finngen_R9_CHIRBIL_PRIM.gz	outcome	2888_49_C7_C7.txt.gz	Simple mode	60	0.120529	0.246612	0.626839
2888_49_C7_C7.txt.gz	finngen_R9_CHIRBIL_PRIM.gz	outcome	2888_49_C7_C7.txt.gz	Weighted mode	60	0.0903398	0.131164	0.493677
2890_59_CCL28_CCL28.txt.gz	finngen_R9_CHIRBIL_PRIM.gz	outcome	2890_59_CCL28_CCL28.txt.gz	Inverse variance weighted	2	0.333003	0.846818	0.694142
2900_53_CCL14_HCC_1.txt.gz	finngen_R9_CHIRBIL_PRIM.gz	outcome	2900_53_CCL14_HCC_1.txt.gz	MR Egger	37	-0.0983927	0.167279	0.560177
2900_53_CCL14_HCC_1.txt.gz	finngen_R9_CHIRBIL_PRIM.gz	outcome	2900_53_CCL14_HCC_1.txt.gz	Weighted median	37	-0.156062	0.143153	0.275636
2900_53_CCL14_HCC_1.txt.gz	finngen_R9_CHIRBIL_PRIM.gz	outcome	2900_53_CCL14_HCC_1.txt.gz	Inverse variance weighted	37	0.0510909	0.112362	0.649326
2900_53_CCL14_HCC_1.txt.gz	finngen_R9_CHIRBIL_PRIM.gz	outcome	2900_53_CCL14_HCC_1.txt.gz	Simple mode	37	-0.330749	0.336984	0.332898
2900_53_CCL14_HCC_1.txt.gz	finngen_R9_CHIRBIL_PRIM.gz	outcome	2900_53_CCL14_HCC_1.txt.gz	Weighted mode	37	-0.112545	0.143376	0.437612
2911_27_MDK_Midkine.txt.gz	finngen_R9_CHIRBIL_PRIM.gz	outcome	2911_27_MDK_Midkine.txt.gz	MR Egger	4	-0.501428	1.65148	0.790089
2911_27_MDK_Midkine.txt.gz	finngen_R9_CHIRBIL_PRIM.gz	outcome	2911_27_MDK_Midkine.txt.gz	Weighted median	4	-2.00089	0.777251	0.0100437
2911_27_MDK_Midkine.txt.gz	finngen_R9_CHIRBIL_PRIM.gz	outcome	2911_27_MDK_Midkine.txt.gz	Inverse variance weighted	4	-1.65309	0.824927	0.045078
2911_27_MDK_Midkine.txt.gz	finngen_R9_CHIRBIL_PRIM.gz	outcome	2911_27_MDK_Midkine.txt.gz	Simple mode	4	-2.27566	0.852389	0.0757067
2911_27_MDK_Midkine.txt.gz	finngen_R9_CHIRBIL_PRIM.gz	outcome	2911_27_MDK_Midkine.txt.gz	Weighted mode	4	-2.08466	0.783653	0.0763269
2913_1_CCL23_MPIF_1.txt.gz	finngen_R9_CHIRBIL_PRIM.gz	outcome	2913_1_CCL23_MPIF_1.txt.gz	MR Egger	35	-0.205078	0.145386	0.167727
2913_1_CCL23_MPIF_1.txt.gz	finngen_R9_CHIRBIL_PRIM.gz	outcome	2913_1_CCL23_MPIF_1.txt.gz	Weighted median	35	-0.282834	0.129963	0.0295354
2913_1_CCL23_MPIF_1.txt.gz	finngen_R9_CHIRBIL_PRIM.gz	outcome	2913_1_CCL23_MPIF_1.txt.gz	Inverse variance weighted	35	-0.269278	0.0921856	0.00348861
2913_1_CCL23_MPIF_1.txt.gz	finngen_R9_CHIRBIL_PRIM.gz	outcome	2913_1_CCL23_MPIF_1.txt.gz	Simple mode	35	-0.220941	0.207334	0.294102
2913_1_CCL23_MPIF_1.txt.gz	finngen_R9_CHIRBIL_PRIM.gz	outcome	2913_1_CCL23_MPIF_1.txt.gz	Weighted mode	35	-0.246392	0.11771	0.0438633
2925_9_SERPINE1_PAI_1.txt.gz	finngen_R9_CHIRBIL_PRIM.gz	outcome	2925_9_SERPINE1_PAI_1.txt.gz	MR Egger	3	-0.581084	4.942	0.925488
2925_9_SERPINE1_PAI_1.txt.gz	finngen_R9_CHIRBIL_PRIM.gz	outcome	2925_9_SERPINE1_PAI_1.txt.gz	Weighted median	3	-1.13328	0.731882	0.121515
2925_9_SERPINE1_PAI_1.txt.gz	finngen_R9_CHIRBIL_PRIM.gz	outcome	2925_9_SERPINE1_PAI_1.txt.gz	Inverse variance weighted	3	-0.768108	0.622959	0.217576
2925_9_SERPINE1_PAI_1.txt.gz	finngen_R9_CHIRBIL_PRIM.gz	outcome	2925_9_SERPINE1_PAI_1.txt.gz	Simple mode	3	-1.20557	0.948802	0.331666
2925_9_SERPINE1_PAI_1.txt.gz	finngen_R9_CHIRBIL_PRIM.gz	outcome	2925_9_SERPINE1_PAI_1.txt.gz	Weighted mode	3	-1.20557	0.880338	0.304357
2944_66_NBL1_DAN.txt.gz	finngen_R9_CHIRBIL_PRIM.gz	outcome	2944_66_NBL1_DAN.txt.gz	Wald ratio	1	-1.02501	1.2122	0.397785
2946_52_CFD_Factor_D.txt.gz	finngen_R9_CHIRBIL_PRIM.gz	outcome	2946_52_CFD_Factor_D.txt.gz	MR Egger	32	0.819405	0.33971	0.0221866
2946_52_CFD_Factor_D.txt.gz	finngen_R9_CHIRBIL_PRIM.gz	outcome	2946_52_CFD_Factor_D.txt.gz	Weighted median	32	0.54562	0.213697	0.0106727
2946_52_CFD_Factor_D.txt.gz	finngen_R9_CHIRBIL_PRIM.gz	outcome	2946_52_CFD_Factor_D.txt.gz	Inverse variance weighted	32	0.454761	0.154249	0.00319615
2946_52_CFD_Factor_D.txt.gz	finngen_R9_CHIRBIL_PRIM.gz	outcome	2946_52_CFD_Factor_D.txt.gz	Simple mode	32	0.852771	0.388067	0.0355843
2946_52_CFD_Factor_D.txt.gz	finngen_R9_CHIRBIL_PRIM.gz	outcome	2946_52_CFD_Factor_D.txt.gz	Weighted mode	32	0.695849	0.299122	0.0267127
2948_58_GHR_Growth_hormone_receptor.txt.gz	finngen_R9_CHIRBIL_PRIM.gz	outcome	2948_58_GHR_Growth_hormone_receptor.txt.gz	MR Egger	14	0.677047	0.477502	0.181663
2948_58_GHR_Growth_hormone_receptor.txt.gz	finngen_R9_CHIRBIL_PRIM.gz	outcome	2948_58_GHR_Growth_hormone_receptor.txt.gz	Weighted median	14	0.361425	0.287928	0.209384
2948_58_GHR_Growth_hormone_receptor.txt.gz	finngen_R9_CHIRBIL_PRIM.gz	outcome	2948_58_GHR_Growth_hormone_receptor.txt.gz	Inverse variance weighted	14	0.176331	0.21272	0.40714
2948_58_GHR_Growth_hormone_receptor.txt.gz	finngen_R9_CHIRBIL_PRIM.gz	outcome	2948_58_GHR_Growth_hormone_receptor.txt.gz	Simple mode	14	-0.00895759	0.435559	0.983904
2948_58_GHR_Growth_hormone_receptor.txt.gz	finngen_R9_CHIRBIL_PRIM.gz	outcome	2948_58_GHR_Growth_hormone_receptor.txt.gz	Weighted mode	14	0.289137	0.32777	0.393723
2950_57_IGFBP4_IGFBP_4.txt.gz	finngen_R9_CHIRBIL_PRIM.gz	outcome	2950_57_IGFBP4_IGFBP_4.txt.gz	Wald ratio	1	1.09793	1.09298	0.315127
2961_1_PROC_Protein_C.txt.gz	finngen_R9_CHIRBIL_PRIM.gz	outcome	2961_1_PROC_Protein_C.txt.gz	MR Egger	15	1.79432	0.703447	0.0241579
2961_1_PROC_Protein_C.txt.gz	finngen_R9_CHIRBIL_PRIM.gz	outcome	2961_1_PROC_Protein_C.txt.gz	Weighted median	15	0.485886	0.349069	0.163939
2961_1_PROC_Protein_C.txt.gz	finngen_R9_CHIRBIL_PRIM.gz	outcome	2961_1_PROC_Protein_C.txt.gz	Inverse variance weighted	15	0.450714	0.255229	0.0774097
2961_1_PROC_Protein_C.txt.gz	finngen_R9_CHIRBIL_PRIM.gz	outcome	2961_1_PROC_Protein_C.txt.gz	Simple mode	15	0.642089	0.58612	0.29179
2961_1_PROC_Protein_C.txt.gz	finngen_R9_CHIRBIL_PRIM.gz	outcome	2961_1_PROC_Protein_C.txt.gz	Weighted mode	15	0.579677	0.402282	0.171584
2962_50_PTHLH_PTHrP.txt.gz	finngen_R9_CHIRBIL_PRIM.gz	outcome	2962_50_PTHLH_PTHrP.txt.gz	MR Egger	7	0.406989	0.962592	0.690005
2962_50_PTHLH_PTHrP.txt.gz	finngen_R9_CHIRBIL_PRIM.gz	outcome	2962_50_PTHLH_PTHrP.txt.gz	Weighted median	7	-0.130048	0.45264	0.773876
2962_50_PTHLH_PTHrP.txt.gz	finngen_R9_CHIRBIL_PRIM.gz	outcome	2962_50_PTHLH_PTHrP.txt.gz	Inverse variance weighted	7	-0.202921	0.355598	0.56824
2962_50_PTHLH_PTHrP.txt.gz	finngen_R9_CHIRBIL_PRIM.gz	outcome	2962_50_PTHLH_PTHrP.txt.gz	Simple mode	7	-0.438419	0.618625	0.505101
2962_50_PTHLH_PTHrP.txt.gz	finngen_R9_CHIRBIL_PRIM.gz	outcome	2962_50_PTHLH_PTHrP.txt.gz	Weighted mode	7	-0.108861	0.504861	0.836423
2966_65_CLEC11A_SCGF_beta.txt.gz	finngen_R9_CHIRBIL_PRIM.gz	outcome	2966_65_CLEC11A_SCGF_beta.txt.gz	MR Egger	17	0.182448	0.226311	0.432734
2966_65_CLEC11A_SCGF_beta.txt.gz	finngen_R9_CHIRBIL_PRIM.gz	outcome	2966_65_CLEC11A_SCGF_beta.txt.gz	Weighted median	17	0.170296	0.191363	0.373513
2966_65_CLEC11A_SCGF_beta.txt.gz	finngen_R9_CHIRBIL_PRIM.gz	outcome	2966_65_CLEC11A_SCGF_beta.txt.gz	Inverse variance weighted	17	0.135615	0.167023	0.416816
2966_65_CLEC11A_SCGF_beta.txt.gz	finngen_R9_CHIRBIL_PRIM.gz	outcome	2966_65_CLEC11A_SCGF_beta.txt.gz	Simple mode	17	0.124707	0.459872	0.789721
2966_65_CLEC11A_SCGF_beta.txt.gz	finngen_R9_CHIRBIL_PRIM.gz	outcome	2966_65_CLEC11A_SCGF_beta.txt.gz	Weighted mode	17	0.159969	0.185575	0.401413
2968_61_TNFSF15_TNFSF15.txt.gz	finngen_R9_CHIRBIL_PRIM.gz	outcome	2968_61_TNFSF15_TNFSF15.txt.gz	Wald ratio	1	-0.694581	1.37462	0.613357
2972_57_BMP7_BMP_7.txt.gz	finngen_R9_CHIRBIL_PRIM.gz	outcome	2972_57_BMP7_BMP_7.txt.gz	Wald ratio	1	1.34785	1.11568	0.227008
2973_15_CD36_CD36_ANTIGEN.txt.gz	finngen_R9_CHIRBIL_PRIM.gz	outcome	2973_15_CD36_CD36_ANTIGEN.txt.gz	MR Egger	20	0.675153	0.35797	0.075529
2973_15_CD36_CD36_ANTIGEN.txt.gz	finngen_R9_CHIRBIL_PRIM.gz	outcome	2973_15_CD36_CD36_ANTIGEN.txt.gz	Weighted median	20	0.346153	0.25377	0.172554
2973_15_CD36_CD36_ANTIGEN.txt.gz	finngen_R9_CHIRBIL_PRIM.gz	outcome	2973_15_CD36_CD36_ANTIGEN.txt.gz	Inverse variance weighted	20	0.332616	0.172645	0.0540316
2973_15_CD36_CD36_ANTIGEN.txt.gz	finngen_R9_CHIRBIL_PRIM.gz	outcome	2973_15_CD36_CD36_ANTIGEN.txt.gz	Simple mode	20	0.323841	0.435259	0.465968
2973_15_CD36_CD36_ANTIGEN.txt.gz	finngen_R9_CHIRBIL_PRIM.gz	outcome	2973_15_CD36_CD36_ANTIGEN.txt.gz	Weighted mode	20	0.251373	0.30391	0.41843
2974_61_CNTN1_contactin_1.txt.gz	finngen_R9_CHIRBIL_PRIM.gz	outcome	2974_61_CNTN1_contactin_1.txt.gz	MR Egger	49	-0.173844	0.278582	0.535625
2974_61_CNTN1_contactin_1.txt.gz	finngen_R9_CHIRBIL_PRIM.gz	outcome	2974_61_CNTN1_contactin_1.txt.gz	Weighted median	49	-0.193471	0.189808	0.308062
2974_61_CNTN1_contactin_1.txt.gz	finngen_R9_CHIRBIL_PRIM.gz	outcome	2974_61_CNTN1_contactin_1.txt.gz	Inverse variance weighted	49	0.0162592	0.130626	0.900942
2974_61_CNTN1_contactin_1.txt.gz	finngen_R9_CHIRBIL_PRIM.gz	outcome	2974_61_CNTN1_contactin_1.txt.gz	Simple mode	49	0.0636054	0.361968	0.861252
2974_61_CNTN1_contactin_1.txt.gz	finngen_R9_CHIRBIL_PRIM.gz	outcome	2974_61_CNTN1_contactin_1.txt.gz	Weighted mode	49	-0.163231	0.24383	0.506419
2977_7_EDAR_EDAR.txt.gz	finngen_R9_CHIRBIL_PRIM.gz	outcome	2977_7_EDAR_EDAR.txt.gz	MR Egger	41	-0.223106	0.158512	0.1672
2977_7_EDAR_EDAR.txt.gz	finngen_R9_CHIRBIL_PRIM.gz	outcome	2977_7_EDAR_EDAR.txt.gz	Weighted median	41	-0.0349322	0.158296	0.825344
2977_7_EDAR_EDAR.txt.gz	finngen_R9_CHIRBIL_PRIM.gz	outcome	2977_7_EDAR_EDAR.txt.gz	Inverse variance weighted	41	-0.12782	0.109558	0.243335
2977_7_EDAR_EDAR.txt.gz	finngen_R9_CHIRBIL_PRIM.gz	outcome	2977_7_EDAR_EDAR.txt.gz	Simple mode	41	0.0478426	0.298345	0.873405
2977_7_EDAR_EDAR.txt.gz	finngen_R9_CHIRBIL_PRIM.gz	outcome	2977_7_EDAR_EDAR.txt.gz	Weighted mode	41	-0.0275658	0.158834	0.863094
2979_8_CXCL5_ENA_78.txt.gz	finngen_R9_CHIRBIL_PRIM.gz	outcome	2979_8_CXCL5_ENA_78.txt.gz	MR Egger	6	-0.00420337	0.812189	0.996118
2979_8_CXCL5_ENA_78.txt.gz	finngen_R9_CHIRBIL_PRIM.gz	outcome	2979_8_CXCL5_ENA_78.txt.gz	Weighted median	6	-0.154368	0.428906	0.718914
2979_8_CXCL5_ENA_78.txt.gz	finngen_R9_CHIRBIL_PRIM.gz	outcome	2979_8_CXCL5_ENA_78.txt.gz	Inverse variance weighted	6	-0.11826	0.371719	0.750376
2979_8_CXCL5_ENA_78.txt.gz	finngen_R9_CHIRBIL_PRIM.gz	outcome	2979_8_CXCL5_ENA_78.txt.gz	Simple mode	6	-0.260959	0.63082	0.696253
2979_8_CXCL5_ENA_78.txt.gz	finngen_R9_CHIRBIL_PRIM.gz	outcome	2979_8_CXCL5_ENA_78.txt.gz	Weighted mode	6	-0.166804	0.491671	0.7482
2985_35_CXCL1_Gro_a.txt.gz	finngen_R9_CHIRBIL_PRIM.gz	outcome	2985_35_CXCL1_Gro_a.txt.gz	MR Egger	74	-0.0174915	0.0923607	0.850326
2985_35_CXCL1_Gro_a.txt.gz	finngen_R9_CHIRBIL_PRIM.gz	outcome	2985_35_CXCL1_Gro_a.txt.gz	Weighted median	74	-0.117073	0.100988	0.246347
2985_35_CXCL1_Gro_a.txt.gz	finngen_R9_CHIRBIL_PRIM.gz	outcome	2985_35_CXCL1_Gro_a.txt.gz	Inverse variance weighted	74	0.00213878	0.066117	0.974194
2985_35_CXCL1_Gro_a.txt.gz	finngen_R9_CHIRBIL_PRIM.gz	outcome	2985_35_CXCL1_Gro_a.txt.gz	Simple mode	74	0.0341032	0.195205	0.861795
2985_35_CXCL1_Gro_a.txt.gz	finngen_R9_CHIRBIL_PRIM.gz	outcome	2985_35_CXCL1_Gro_a.txt.gz	Weighted mode	74	-0.0903138	0.0870262	0.302799
2991_9_IL1R1_IL_1_sRI.txt.gz	finngen_R9_CHIRBIL_PRIM.gz	outcome	2991_9_IL1R1_IL_1_sRI.txt.gz	MR Egger	27	-0.455216	0.397923	0.263467
2991_9_IL1R1_IL_1_sRI.txt.gz	finngen_R9_CHIRBIL_PRIM.gz	outcome	2991_9_IL1R1_IL_1_sRI.txt.gz	Weighted median	27	-0.669081	0.251663	0.00784563
2991_9_IL1R1_IL_1_sRI.txt.gz	finngen_R9_CHIRBIL_PRIM.gz	outcome	2991_9_IL1R1_IL_1_sRI.txt.gz	Inverse variance weighted	27	-0.483543	0.178358	0.00670657
2991_9_IL1R1_IL_1_sRI.txt.gz	finngen_R9_CHIRBIL_PRIM.gz	outcome	2991_9_IL1R1_IL_1_sRI.txt.gz	Simple mode	27	-0.0149464	0.473889	0.97508
2991_9_IL1R1_IL_1_sRI.txt.gz	finngen_R9_CHIRBIL_PRIM.gz	outcome	2991_9_IL1R1_IL_1_sRI.txt.gz	Weighted mode	27	-0.948963	0.347786	0.0112521
2992_59_IL17RA_IL_17_sR.txt.gz	finngen_R9_CHIRBIL_PRIM.gz	outcome	2992_59_IL17RA_IL_17_sR.txt.gz	MR Egger	157	-0.0383996	0.0579758	0.508737
2992_59_IL17RA_IL_17_sR.txt.gz	finngen_R9_CHIRBIL_PRIM.gz	outcome	2992_59_IL17RA_IL_17_sR.txt.gz	Weighted median	157	-0.033024	0.057364	0.564823
2992_59_IL17RA_IL_17_sR.txt.gz	finngen_R9_CHIRBIL_PRIM.gz	outcome	2992_59_IL17RA_IL_17_sR.txt.gz	Inverse variance weighted	157	-0.0111722	0.0352248	0.751117
2992_59_IL17RA_IL_17_sR.txt.gz	finngen_R9_CHIRBIL_PRIM.gz	outcome	2992_59_IL17RA_IL_17_sR.txt.gz	Simple mode	157	-0.0620752	0.113127	0.583982
2992_59_IL17RA_IL_17_sR.txt.gz	finngen_R9_CHIRBIL_PRIM.gz	outcome	2992_59_IL17RA_IL_17_sR.txt.gz	Weighted mode	157	-0.0620752	0.0549816	0.260624
2993_1_IL18RAP_IL_18_Rb.txt.gz	finngen_R9_CHIRBIL_PRIM.gz	outcome	2993_1_IL18RAP_IL_18_Rb.txt.gz	Inverse variance weighted	2	-0.306571	1.84327	0.867906
2994_71_IL1RL2_IL_1Rrp2.txt.gz	finngen_R9_CHIRBIL_PRIM.gz	outcome	2994_71_IL1RL2_IL_1Rrp2.txt.gz	MR Egger	16	1.12378	0.429455	0.0203043
2994_71_IL1RL2_IL_1Rrp2.txt.gz	finngen_R9_CHIRBIL_PRIM.gz	outcome	2994_71_IL1RL2_IL_1Rrp2.txt.gz	Weighted median	16	0.585653	0.312915	0.0612618
2994_71_IL1RL2_IL_1Rrp2.txt.gz	finngen_R9_CHIRBIL_PRIM.gz	outcome	2994_71_IL1RL2_IL_1Rrp2.txt.gz	Inverse variance weighted	16	0.195403	0.236114	0.407909
2994_71_IL1RL2_IL_1Rrp2.txt.gz	finngen_R9_CHIRBIL_PRIM.gz	outcome	2994_71_IL1RL2_IL_1Rrp2.txt.gz	Simple mode	16	0.476842	0.587959	0.430039
2994_71_IL1RL2_IL_1Rrp2.txt.gz	finngen_R9_CHIRBIL_PRIM.gz	outcome	2994_71_IL1RL2_IL_1Rrp2.txt.gz	Weighted mode	16	0.680008	0.266318	0.0220504
3000_66_MBL2_MBL.txt.gz	finngen_R9_CHIRBIL_PRIM.gz	outcome	3000_66_MBL2_MBL.txt.gz	MR Egger	153	0.0594227	0.0630553	0.347498
3000_66_MBL2_MBL.txt.gz	finngen_R9_CHIRBIL_PRIM.gz	outcome	3000_66_MBL2_MBL.txt.gz	Weighted median	153	0.109843	0.0580003	0.058246
3000_66_MBL2_MBL.txt.gz	finngen_R9_CHIRBIL_PRIM.gz	outcome	3000_66_MBL2_MBL.txt.gz	Inverse variance weighted	153	0.070742	0.0384266	0.0656264
3000_66_MBL2_MBL.txt.gz	finngen_R9_CHIRBIL_PRIM.gz	outcome	3000_66_MBL2_MBL.txt.gz	Simple mode	153	0.130059	0.118672	0.274832
3000_66_MBL2_MBL.txt.gz	finngen_R9_CHIRBIL_PRIM.gz	outcome	3000_66_MBL2_MBL.txt.gz	Weighted mode	153	0.0938778	0.0546966	0.0881375
3004_67_PDCD1LG2_PD_L2.txt.gz	finngen_R9_CHIRBIL_PRIM.gz	outcome	3004_67_PDCD1LG2_PD_L2.txt.gz	MR Egger	46	-0.0642558	0.20165	0.751499
3004_67_PDCD1LG2_PD_L2.txt.gz	finngen_R9_CHIRBIL_PRIM.gz	outcome	3004_67_PDCD1LG2_PD_L2.txt.gz	Weighted median	46	-0.0273607	0.158106	0.86261
3004_67_PDCD1LG2_PD_L2.txt.gz	finngen_R9_CHIRBIL_PRIM.gz	outcome	3004_67_PDCD1LG2_PD_L2.txt.gz	Inverse variance weighted	46	0.0567288	0.104524	0.587311
3004_67_PDCD1LG2_PD_L2.txt.gz	finngen_R9_CHIRBIL_PRIM.gz	outcome	3004_67_PDCD1LG2_PD_L2.txt.gz	Simple mode	46	-0.0409994	0.295576	0.890298
3004_67_PDCD1LG2_PD_L2.txt.gz	finngen_R9_CHIRBIL_PRIM.gz	outcome	3004_67_PDCD1LG2_PD_L2.txt.gz	Weighted mode	46	-0.0527209	0.152299	0.73083
3007_7_SIGLEC9_Siglec_9.txt.gz	finngen_R9_CHIRBIL_PRIM.gz	outcome	3007_7_SIGLEC9_Siglec_9.txt.gz	MR Egger	179	-0.0521728	0.0651897	0.424596
3007_7_SIGLEC9_Siglec_9.txt.gz	finngen_R9_CHIRBIL_PRIM.gz	outcome	3007_7_SIGLEC9_Siglec_9.txt.gz	Weighted median	179	-0.0472208	0.0556649	0.396268
3007_7_SIGLEC9_Siglec_9.txt.gz	finngen_R9_CHIRBIL_PRIM.gz	outcome	3007_7_SIGLEC9_Siglec_9.txt.gz	Inverse variance weighted	179	-0.0968398	0.0399982	0.0154734
3007_7_SIGLEC9_Siglec_9.txt.gz	finngen_R9_CHIRBIL_PRIM.gz	outcome	3007_7_SIGLEC9_Siglec_9.txt.gz	Simple mode	179	-0.277167	0.112987	0.0151276
3007_7_SIGLEC9_Siglec_9.txt.gz	finngen_R9_CHIRBIL_PRIM.gz	outcome	3007_7_SIGLEC9_Siglec_9.txt.gz	Weighted mode	179	-0.0722783	0.0470823	0.126523
3009_3_TGFBR3_TGF_b_R_III.txt.gz	finngen_R9_CHIRBIL_PRIM.gz	outcome	3009_3_TGFBR3_TGF_b_R_III.txt.gz	MR Egger	8	-0.66048	1.07331	0.560912
3009_3_TGFBR3_TGF_b_R_III.txt.gz	finngen_R9_CHIRBIL_PRIM.gz	outcome	3009_3_TGFBR3_TGF_b_R_III.txt.gz	Weighted median	8	0.164027	0.413725	0.691763
3009_3_TGFBR3_TGF_b_R_III.txt.gz	finngen_R9_CHIRBIL_PRIM.gz	outcome	3009_3_TGFBR3_TGF_b_R_III.txt.gz	Inverse variance weighted	8	-0.0162417	0.324026	0.960023
3009_3_TGFBR3_TGF_b_R_III.txt.gz	finngen_R9_CHIRBIL_PRIM.gz	outcome	3009_3_TGFBR3_TGF_b_R_III.txt.gz	Simple mode	8	0.11018	0.596121	0.858605
3009_3_TGFBR3_TGF_b_R_III.txt.gz	finngen_R9_CHIRBIL_PRIM.gz	outcome	3009_3_TGFBR3_TGF_b_R_III.txt.gz	Weighted mode	8	0.176121	0.57842	0.76961
3024_18_SERPINF2_a2_Antiplasmin.txt.gz	finngen_R9_CHIRBIL_PRIM.gz	outcome	3024_18_SERPINF2_a2_Antiplasmin.txt.gz	MR Egger	17	-0.585885	0.611251	0.353006
3024_18_SERPINF2_a2_Antiplasmin.txt.gz	finngen_R9_CHIRBIL_PRIM.gz	outcome	3024_18_SERPINF2_a2_Antiplasmin.txt.gz	Weighted median	17	-0.105041	0.34118	0.758177
3024_18_SERPINF2_a2_Antiplasmin.txt.gz	finngen_R9_CHIRBIL_PRIM.gz	outcome	3024_18_SERPINF2_a2_Antiplasmin.txt.gz	Inverse variance weighted	17	0.0517664	0.259288	0.841756
3024_18_SERPINF2_a2_Antiplasmin.txt.gz	finngen_R9_CHIRBIL_PRIM.gz	outcome	3024_18_SERPINF2_a2_Antiplasmin.txt.gz	Simple mode	17	-0.244889	0.644263	0.708865
3024_18_SERPINF2_a2_Antiplasmin.txt.gz	finngen_R9_CHIRBIL_PRIM.gz	outcome	3024_18_SERPINF2_a2_Antiplasmin.txt.gz	Weighted mode	17	-0.139984	0.385441	0.721225
3025_50_FGF2_bFGF.txt.gz	finngen_R9_CHIRBIL_PRIM.gz	outcome	3025_50_FGF2_bFGF.txt.gz	MR Egger	81	0.148484	0.133846	0.270637
3025_50_FGF2_bFGF.txt.gz	finngen_R9_CHIRBIL_PRIM.gz	outcome	3025_50_FGF2_bFGF.txt.gz	Weighted median	81	0.247204	0.1183	0.0366497
3025_50_FGF2_bFGF.txt.gz	finngen_R9_CHIRBIL_PRIM.gz	outcome	3025_50_FGF2_bFGF.txt.gz	Inverse variance weighted	81	0.310168	0.0744969	3.134e-05
3025_50_FGF2_bFGF.txt.gz	finngen_R9_CHIRBIL_PRIM.gz	outcome	3025_50_FGF2_bFGF.txt.gz	Simple mode	81	0.354589	0.20693	0.09048
3025_50_FGF2_bFGF.txt.gz	finngen_R9_CHIRBIL_PRIM.gz	outcome	3025_50_FGF2_bFGF.txt.gz	Weighted mode	81	0.309993	0.108547	0.00546634
3028_36_CCL23_Ck_b_8_1.txt.gz	finngen_R9_CHIRBIL_PRIM.gz	outcome	3028_36_CCL23_Ck_b_8_1.txt.gz	MR Egger	48	-0.21088	0.0943412	0.0302947
3028_36_CCL23_Ck_b_8_1.txt.gz	finngen_R9_CHIRBIL_PRIM.gz	outcome	3028_36_CCL23_Ck_b_8_1.txt.gz	Weighted median	48	-0.149265	0.0949973	0.116124
3028_36_CCL23_Ck_b_8_1.txt.gz	finngen_R9_CHIRBIL_PRIM.gz	outcome	3028_36_CCL23_Ck_b_8_1.txt.gz	Inverse variance weighted	48	-0.184008	0.0663589	0.00555561
3028_36_CCL23_Ck_b_8_1.txt.gz	finngen_R9_CHIRBIL_PRIM.gz	outcome	3028_36_CCL23_Ck_b_8_1.txt.gz	Simple mode	48	-0.329782	0.206624	0.117179
3028_36_CCL23_Ck_b_8_1.txt.gz	finngen_R9_CHIRBIL_PRIM.gz	outcome	3028_36_CCL23_Ck_b_8_1.txt.gz	Weighted mode	48	-0.206695	0.0806472	0.0136403
3029_52_CD209_DC_SIGN.txt.gz	finngen_R9_CHIRBIL_PRIM.gz	outcome	3029_52_CD209_DC_SIGN.txt.gz	MR Egger	33	0.0549796	0.206288	0.791605
3029_52_CD209_DC_SIGN.txt.gz	finngen_R9_CHIRBIL_PRIM.gz	outcome	3029_52_CD209_DC_SIGN.txt.gz	Weighted median	33	-0.00296869	0.149617	0.98417
3029_52_CD209_DC_SIGN.txt.gz	finngen_R9_CHIRBIL_PRIM.gz	outcome	3029_52_CD209_DC_SIGN.txt.gz	Inverse variance weighted	33	-0.0576931	0.122059	0.63645
3029_52_CD209_DC_SIGN.txt.gz	finngen_R9_CHIRBIL_PRIM.gz	outcome	3029_52_CD209_DC_SIGN.txt.gz	Simple mode	33	-0.0284222	0.266364	0.91569
3029_52_CD209_DC_SIGN.txt.gz	finngen_R9_CHIRBIL_PRIM.gz	outcome	3029_52_CD209_DC_SIGN.txt.gz	Weighted mode	33	-0.0284222	0.136279	0.836115
3038_9_CXCL11_I_TAC.txt.gz	finngen_R9_CHIRBIL_PRIM.gz	outcome	3038_9_CXCL11_I_TAC.txt.gz	MR Egger	45	0.189865	0.198791	0.344868
3038_9_CXCL11_I_TAC.txt.gz	finngen_R9_CHIRBIL_PRIM.gz	outcome	3038_9_CXCL11_I_TAC.txt.gz	Weighted median	45	0.0136192	0.16128	0.932703
3038_9_CXCL11_I_TAC.txt.gz	finngen_R9_CHIRBIL_PRIM.gz	outcome	3038_9_CXCL11_I_TAC.txt.gz	Inverse variance weighted	45	0.0799191	0.102606	0.436043
3038_9_CXCL11_I_TAC.txt.gz	finngen_R9_CHIRBIL_PRIM.gz	outcome	3038_9_CXCL11_I_TAC.txt.gz	Simple mode	45	0.0843396	0.283281	0.767315
3038_9_CXCL11_I_TAC.txt.gz	finngen_R9_CHIRBIL_PRIM.gz	outcome	3038_9_CXCL11_I_TAC.txt.gz	Weighted mode	45	0.00416993	0.151334	0.978142
3040_59_CCL3_MIP_1a.txt.gz	finngen_R9_CHIRBIL_PRIM.gz	outcome	3040_59_CCL3_MIP_1a.txt.gz	MR Egger	10	0.198065	0.211647	0.376746
3040_59_CCL3_MIP_1a.txt.gz	finngen_R9_CHIRBIL_PRIM.gz	outcome	3040_59_CCL3_MIP_1a.txt.gz	Weighted median	10	0.173371	0.157143	0.26991
3040_59_CCL3_MIP_1a.txt.gz	finngen_R9_CHIRBIL_PRIM.gz	outcome	3040_59_CCL3_MIP_1a.txt.gz	Inverse variance weighted	10	0.206781	0.135148	0.126008
3040_59_CCL3_MIP_1a.txt.gz	finngen_R9_CHIRBIL_PRIM.gz	outcome	3040_59_CCL3_MIP_1a.txt.gz	Simple mode	10	0.265377	0.244309	0.30561
3040_59_CCL3_MIP_1a.txt.gz	finngen_R9_CHIRBIL_PRIM.gz	outcome	3040_59_CCL3_MIP_1a.txt.gz	Weighted mode	10	0.163093	0.160027	0.334742
3041_55_MRC2_MRC2.txt.gz	finngen_R9_CHIRBIL_PRIM.gz	outcome	3041_55_MRC2_MRC2.txt.gz	MR Egger	20	0.118409	0.319449	0.715211
3041_55_MRC2_MRC2.txt.gz	finngen_R9_CHIRBIL_PRIM.gz	outcome	3041_55_MRC2_MRC2.txt.gz	Weighted median	20	-0.11576	0.251034	0.644702
3041_55_MRC2_MRC2.txt.gz	finngen_R9_CHIRBIL_PRIM.gz	outcome	3041_55_MRC2_MRC2.txt.gz	Inverse variance weighted	20	-0.212258	0.183448	0.247253
3041_55_MRC2_MRC2.txt.gz	finngen_R9_CHIRBIL_PRIM.gz	outcome	3041_55_MRC2_MRC2.txt.gz	Simple mode	20	-0.181273	0.419883	0.670802
3041_55_MRC2_MRC2.txt.gz	finngen_R9_CHIRBIL_PRIM.gz	outcome	3041_55_MRC2_MRC2.txt.gz	Weighted mode	20	-0.0505519	0.275804	0.856513
3043_49_SPARC_ON.txt.gz	finngen_R9_CHIRBIL_PRIM.gz	outcome	3043_49_SPARC_ON.txt.gz	Wald ratio	1	-1.51902	2.46342	0.537478
3044_3_CCL18_PARC.txt.gz	finngen_R9_CHIRBIL_PRIM.gz	outcome	3044_3_CCL18_PARC.txt.gz	MR Egger	49	-0.0366998	0.09333	0.695931
3044_3_CCL18_PARC.txt.gz	finngen_R9_CHIRBIL_PRIM.gz	outcome	3044_3_CCL18_PARC.txt.gz	Weighted median	49	0.0291334	0.0936321	0.755689
3044_3_CCL18_PARC.txt.gz	finngen_R9_CHIRBIL_PRIM.gz	outcome	3044_3_CCL18_PARC.txt.gz	Inverse variance weighted	49	0.112661	0.0717258	0.116249
3044_3_CCL18_PARC.txt.gz	finngen_R9_CHIRBIL_PRIM.gz	outcome	3044_3_CCL18_PARC.txt.gz	Simple mode	49	0.0166485	0.223064	0.940815
3044_3_CCL18_PARC.txt.gz	finngen_R9_CHIRBIL_PRIM.gz	outcome	3044_3_CCL18_PARC.txt.gz	Weighted mode	49	0.0316013	0.0797328	0.69361
3045_72_PTN_PTN.txt.gz	finngen_R9_CHIRBIL_PRIM.gz	outcome	3045_72_PTN_PTN.txt.gz	MR Egger	22	-0.351792	0.405492	0.395921
3045_72_PTN_PTN.txt.gz	finngen_R9_CHIRBIL_PRIM.gz	outcome	3045_72_PTN_PTN.txt.gz	Weighted median	22	-0.373095	0.277246	0.178394
3045_72_PTN_PTN.txt.gz	finngen_R9_CHIRBIL_PRIM.gz	outcome	3045_72_PTN_PTN.txt.gz	Inverse variance weighted	22	-0.303866	0.194577	0.118365
3045_72_PTN_PTN.txt.gz	finngen_R9_CHIRBIL_PRIM.gz	outcome	3045_72_PTN_PTN.txt.gz	Simple mode	22	-0.319464	0.490931	0.522277
3045_72_PTN_PTN.txt.gz	finngen_R9_CHIRBIL_PRIM.gz	outcome	3045_72_PTN_PTN.txt.gz	Weighted mode	22	-0.350013	0.285928	0.23446
3046_31_RETN_resistin.txt.gz	finngen_R9_CHIRBIL_PRIM.gz	outcome	3046_31_RETN_resistin.txt.gz	MR Egger	50	-0.00543305	0.192864	0.977643
3046_31_RETN_resistin.txt.gz	finngen_R9_CHIRBIL_PRIM.gz	outcome	3046_31_RETN_resistin.txt.gz	Weighted median	50	-0.0415611	0.165412	0.801615
3046_31_RETN_resistin.txt.gz	finngen_R9_CHIRBIL_PRIM.gz	outcome	3046_31_RETN_resistin.txt.gz	Inverse variance weighted	50	-0.180269	0.108358	0.0961858
3046_31_RETN_resistin.txt.gz	finngen_R9_CHIRBIL_PRIM.gz	outcome	3046_31_RETN_resistin.txt.gz	Simple mode	50	0.14177	0.320253	0.659944
3046_31_RETN_resistin.txt.gz	finngen_R9_CHIRBIL_PRIM.gz	outcome	3046_31_RETN_resistin.txt.gz	Weighted mode	50	-0.0864938	0.209158	0.681021
3049_61_PRSS1_Trypsin.txt.gz	finngen_R9_CHIRBIL_PRIM.gz	outcome	3049_61_PRSS1_Trypsin.txt.gz	Wald ratio	1	0.0166152	1.25838	0.989465
3050_7_VWF_vWF.txt.gz	finngen_R9_CHIRBIL_PRIM.gz	outcome	3050_7_VWF_vWF.txt.gz	MR Egger	7	-0.374472	0.910439	0.697882
3050_7_VWF_vWF.txt.gz	finngen_R9_CHIRBIL_PRIM.gz	outcome	3050_7_VWF_vWF.txt.gz	Weighted median	7	0.168839	0.440669	0.701615
3050_7_VWF_vWF.txt.gz	finngen_R9_CHIRBIL_PRIM.gz	outcome	3050_7_VWF_vWF.txt.gz	Inverse variance weighted	7	-0.178943	0.344258	0.603208
3050_7_VWF_vWF.txt.gz	finngen_R9_CHIRBIL_PRIM.gz	outcome	3050_7_VWF_vWF.txt.gz	Simple mode	7	0.397868	0.861186	0.660359
3050_7_VWF_vWF.txt.gz	finngen_R9_CHIRBIL_PRIM.gz	outcome	3050_7_VWF_vWF.txt.gz	Weighted mode	7	-1.09139	0.840153	0.241615
3054_3_HP_Haptoglobin__Mixed_Type.txt.gz	finngen_R9_CHIRBIL_PRIM.gz	outcome	3054_3_HP_Haptoglobin__Mixed_Type.txt.gz	MR Egger	81	-0.0164176	0.0807504	0.839413
3054_3_HP_Haptoglobin__Mixed_Type.txt.gz	finngen_R9_CHIRBIL_PRIM.gz	outcome	3054_3_HP_Haptoglobin__Mixed_Type.txt.gz	Weighted median	81	-0.0389679	0.0729865	0.593407
3054_3_HP_Haptoglobin__Mixed_Type.txt.gz	finngen_R9_CHIRBIL_PRIM.gz	outcome	3054_3_HP_Haptoglobin__Mixed_Type.txt.gz	Inverse variance weighted	81	8.54666e-05	0.0448124	0.998478
3054_3_HP_Haptoglobin__Mixed_Type.txt.gz	finngen_R9_CHIRBIL_PRIM.gz	outcome	3054_3_HP_Haptoglobin__Mixed_Type.txt.gz	Simple mode	81	-0.0809209	0.123804	0.515232
3054_3_HP_Haptoglobin__Mixed_Type.txt.gz	finngen_R9_CHIRBIL_PRIM.gz	outcome	3054_3_HP_Haptoglobin__Mixed_Type.txt.gz	Weighted mode	81	-0.0575534	0.0797352	0.472518
3059_50_TNFSF13B_BAFF.txt.gz	finngen_R9_CHIRBIL_PRIM.gz	outcome	3059_50_TNFSF13B_BAFF.txt.gz	MR Egger	3	-0.186978	1.47051	0.919485
3059_50_TNFSF13B_BAFF.txt.gz	finngen_R9_CHIRBIL_PRIM.gz	outcome	3059_50_TNFSF13B_BAFF.txt.gz	Weighted median	3	-0.615435	0.757486	0.416522
3059_50_TNFSF13B_BAFF.txt.gz	finngen_R9_CHIRBIL_PRIM.gz	outcome	3059_50_TNFSF13B_BAFF.txt.gz	Inverse variance weighted	3	-0.857779	0.644004	0.182878
3059_50_TNFSF13B_BAFF.txt.gz	finngen_R9_CHIRBIL_PRIM.gz	outcome	3059_50_TNFSF13B_BAFF.txt.gz	Simple mode	3	-0.432469	0.922532	0.685355
3059_50_TNFSF13B_BAFF.txt.gz	finngen_R9_CHIRBIL_PRIM.gz	outcome	3059_50_TNFSF13B_BAFF.txt.gz	Weighted mode	3	-0.435094	0.982177	0.701081
3060_43_C9_C9.txt.gz	finngen_R9_CHIRBIL_PRIM.gz	outcome	3060_43_C9_C9.txt.gz	MR Egger	19	0.222257	0.321836	0.499144
3060_43_C9_C9.txt.gz	finngen_R9_CHIRBIL_PRIM.gz	outcome	3060_43_C9_C9.txt.gz	Weighted median	19	0.302996	0.240801	0.20829
3060_43_C9_C9.txt.gz	finngen_R9_CHIRBIL_PRIM.gz	outcome	3060_43_C9_C9.txt.gz	Inverse variance weighted	19	0.15557	0.184653	0.399508
3060_43_C9_C9.txt.gz	finngen_R9_CHIRBIL_PRIM.gz	outcome	3060_43_C9_C9.txt.gz	Simple mode	19	0.301329	0.428841	0.491257
3060_43_C9_C9.txt.gz	finngen_R9_CHIRBIL_PRIM.gz	outcome	3060_43_C9_C9.txt.gz	Weighted mode	19	0.415092	0.30942	0.196434
3066_12_LGALS3_Galectin_3.txt.gz	finngen_R9_CHIRBIL_PRIM.gz	outcome	3066_12_LGALS3_Galectin_3.txt.gz	MR Egger	23	-0.205337	0.237079	0.396218
3066_12_LGALS3_Galectin_3.txt.gz	finngen_R9_CHIRBIL_PRIM.gz	outcome	3066_12_LGALS3_Galectin_3.txt.gz	Weighted median	23	-0.231088	0.195654	0.23756
3066_12_LGALS3_Galectin_3.txt.gz	finngen_R9_CHIRBIL_PRIM.gz	outcome	3066_12_LGALS3_Galectin_3.txt.gz	Inverse variance weighted	23	-0.2424	0.14433	0.0930569
3066_12_LGALS3_Galectin_3.txt.gz	finngen_R9_CHIRBIL_PRIM.gz	outcome	3066_12_LGALS3_Galectin_3.txt.gz	Simple mode	23	-0.195873	0.361419	0.593297
3066_12_LGALS3_Galectin_3.txt.gz	finngen_R9_CHIRBIL_PRIM.gz	outcome	3066_12_LGALS3_Galectin_3.txt.gz	Weighted mode	23	-0.220651	0.194411	0.268601
3074_6_LBP_LBP.txt.gz	finngen_R9_CHIRBIL_PRIM.gz	outcome	3074_6_LBP_LBP.txt.gz	MR Egger	80	-0.0629985	0.091297	0.492218
3074_6_LBP_LBP.txt.gz	finngen_R9_CHIRBIL_PRIM.gz	outcome	3074_6_LBP_LBP.txt.gz	Weighted median	80	-0.152727	0.0837972	0.0683676
3074_6_LBP_LBP.txt.gz	finngen_R9_CHIRBIL_PRIM.gz	outcome	3074_6_LBP_LBP.txt.gz	Inverse variance weighted	80	-0.0893339	0.0555243	0.107635
3074_6_LBP_LBP.txt.gz	finngen_R9_CHIRBIL_PRIM.gz	outcome	3074_6_LBP_LBP.txt.gz	Simple mode	80	-0.156445	0.142616	0.275986
3074_6_LBP_LBP.txt.gz	finngen_R9_CHIRBIL_PRIM.gz	outcome	3074_6_LBP_LBP.txt.gz	Weighted mode	80	-0.221831	0.0875791	0.013292
3077_66_F10_Coagulation_Factor_Xa.txt.gz	finngen_R9_CHIRBIL_PRIM.gz	outcome	3077_66_F10_Coagulation_Factor_Xa.txt.gz	MR Egger	15	0.50645	0.489517	0.319723
3077_66_F10_Coagulation_Factor_Xa.txt.gz	finngen_R9_CHIRBIL_PRIM.gz	outcome	3077_66_F10_Coagulation_Factor_Xa.txt.gz	Weighted median	15	0.57663	0.348474	0.0979791
3077_66_F10_Coagulation_Factor_Xa.txt.gz	finngen_R9_CHIRBIL_PRIM.gz	outcome	3077_66_F10_Coagulation_Factor_Xa.txt.gz	Inverse variance weighted	15	0.211864	0.24902	0.394887
3077_66_F10_Coagulation_Factor_Xa.txt.gz	finngen_R9_CHIRBIL_PRIM.gz	outcome	3077_66_F10_Coagulation_Factor_Xa.txt.gz	Simple mode	15	-0.165226	0.654615	0.804398
3077_66_F10_Coagulation_Factor_Xa.txt.gz	finngen_R9_CHIRBIL_PRIM.gz	outcome	3077_66_F10_Coagulation_Factor_Xa.txt.gz	Weighted mode	15	0.716674	0.408399	0.101136
[truncated: 2,426 more rows]
